# Supplementary material for: Single-cell multiomics reveals endothelial mechanosensitive PIEZO1 coupling IL-33 regulates the development of pulmonary fibrosis
Source: Research Square preprint supplement (doi:10.21203/rs.3.rs-4861689/v1), 2024-09-06
Supplement: Supplementary file 1 [file Table S1.xlsx]

## Sheet: Sheet1
Table S1. Characteristics of Patients of Idiopathic Pulmonary Fibrosis
number	diagnosis	number	Age (yr)	Sex	History of smoking	Specimen Acquisition Method
1	HC	HC1	42	Female	Yes	surgical lung biopsy(SLB)
2	HC	HC2	44	Male	No	surgical lung biopsy(SLB)
5	IPF	IPF1	45	Female	Yes	Transplant
6	IPF	IPF2	60	Male	Yes	Transplant
7	IPF	IPF3	62	Male	No	Transplant
