# Supplementary material for: Single-cell multiomics reveals endothelial mechanosensitive PIEZO1 coupling IL-33 regulates the development of pulmonary fibrosis
Source: Research Square preprint supplement (doi:10.21203/rs.3.rs-4861689/v1), 2024-09-06
Supplement: Supplementary file 2 [file Table S10.xlsx]

## Sheet: Sheet1
Supplenetary Table 9: Mice scRNA sequencing Data Summary
Type	Organism	disease state	sample-name	Number of Reads	Number of Cells (Spots)	Mean Reads/Barcode	Median Genes/Barcode	Median UMI/Barcode
scRNA	Mouse	Bleomycin	Bleomycin1	659564225	6434	102512	1386	4066
scRNA	Mouse	Bleomycin	Bleomycin2	491482484	9257	53093	1447	4080
scRNA	Mouse	Bleomycin	Bleomycin3	473998200	8902	53246	1500	4370
scRNA	Mouse	Saline	Saline1	611533533	6590	92797	1339	3772
scRNA	Mouse	Saline	Saline2	482070773	7982	60395	1593	4588
scRNA	Mouse	Saline	Saline3	517487837	4593	112669	1399	5032
