# Supplementary material for: Single-cell multiomics reveals endothelial mechanosensitive PIEZO1 coupling IL-33 regulates the development of pulmonary fibrosis
Source: Research Square preprint supplement (doi:10.21203/rs.3.rs-4861689/v1), 2024-09-06
Supplement: Supplementary file 3 [file Table S11.xlsx]

## Sheet: Sheet1
Cell type proportions identified from the merged analysis of the Bleomycin-induced mouse model lung samples
Celltype	Number	proportions（%）
scATAC
endothelial cell	996	2.46541
B cell	12172	30.1295
monocyte	3879	9.60172
T cell	7061	17.4782
stromal cell	791	1.95797
macrophage	2690	6.65858
Baso	299	0.740117
dendritic cell	393	0.972796
Matrix	4608	11.4062
natural killer cell	666	1.64856
Neutrophils	2699	6.68086
Clara cell	602	1.49014
Smooth muscle cells	223	0.551994
ILC	913	2.25996
AT2	1770	4.3813
AT1	199	0.492586
Pericytes	209	0.51734
ciliated cell	225	0.556944
other epithelial cell	4	0.00990124
scRNA
B cells	7472	17.9736
Neutrophils	4237	10.192
Matrix	5720	13.7593
AT 2	3074	7.3944
T cells	6176	14.8562
macrophage	3790	9.11671
monocyte	4558	10.9641
natural killer cell	1253	3.01405
ILC	739	1.77764
endo	949	2.28279
Clara cell	525	1.26287
Matrix2	488	1.17387
stromal cell	485	1.16665
AT 1	480	1.15462
epithelial cell	460	1.10651
Pericytes	310	0.745694
dendritic cell	284	0.683152
ciliated cell	246	0.591744
Smooth muscle cells	164	0.394496
Basophils	112	0.269412
MIXED	50	0.120273
