# Supplementary material for: Single-cell multiomics reveals endothelial mechanosensitive PIEZO1 coupling IL-33 regulates the development of pulmonary fibrosis
Source: Research Square preprint supplement (doi:10.21203/rs.3.rs-4861689/v1), 2024-09-06
Supplement: Supplementary file 4 [file Table S12.xlsx]

## Sheet: Sheet 1
	p_val	avg_log2FC	pct.1	pct.2	p_val_adj	tx_id	gene_name	gene_id	gene_biotype	type	closest_region	query_region	distance
chr17-46098376-46098954	3.00091e-09	-0.617207	0.02	0.141	0.000642014	ENSMUST00000024763	Mrps18a	ENSMUSG00000023967	protein_coding	exon	chr17-46110986-46111129	chr17-46098376-46098954	12031
chr14-73507235-73508230	3.63162e-08	-0.474475	0.078	0.247	0.00776949	ENSMUST00000022705	Med4	ENSMUSG00000022109	protein_coding	exon	chr14-73510049-73510185	chr14-73507235-73508230	1818
chr5-17980422-17981068	6.89233e-08	-0.555658	0.03	0.146	0.0147455	ENSMUST00000030561	Gnat3	ENSMUSG00000028777	protein_coding	gap	chr5-17962797-17986436	chr5-17980422-17981068	0
chr17-86769358-86770244	9.49576e-08	-0.454842	0.087	0.245	0.0203152	ENSMUST00000024954	Epas1	ENSMUSG00000024140	protein_coding	gap	chr17-86754309-86797115	chr17-86769358-86770244	0
chr16-29798894-29799614	2.71908e-07	-0.54474	0.028	0.139	0.058172	ENSMUST00000181815	Gm26834	ENSMUSG00000097307	lincRNA	exon	chr16-29811058-29811300	chr16-29798894-29799614	11443
chr6-135251957-135253061	3.51534e-07	-0.419631	0.158	0.356	0.0752072	ENSMUST00000111911	Gsg1	ENSMUSG00000030206	protein_coding	gap	chr6-135244400-135253272	chr6-135251957-135253061	0
chr17-86551576-86552375	6.98239e-07	-0.556188	0.052	0.182	0.149381	ENSMUST00000097275	Prkce	ENSMUSG00000045038	protein_coding	gap	chr17-86496112-86559150	chr17-86551576-86552375	0
chr15-64421425-64422208	7.34736e-07	-0.537575	0.095	0.25	0.157189	ENSMUST00000023008	Asap1	ENSMUSG00000022377	protein_coding	exon	chr15-64382717-64382919	chr15-64421425-64422208	38505
chr6-116644015-116644721	7.51883e-07	-0.523986	0.055	0.177	0.160858	ENSMUST00000035842	Rassf4	ENSMUSG00000042129	protein_coding	gap	chr6-116641787-116645095	chr6-116644015-116644721	0
chr4-137888044-137888293	8.4397e-07	-0.477007	0.022	0.116	0.180559	ENSMUST00000130407	Ece1	ENSMUSG00000057530	protein_coding	gap	chr4-137862382-137913767	chr4-137888044-137888293	0
chr3-115768447-115769425	1.10383e-06	-0.548189	0.123	0.295	0.236153	ENSMUST00000055676	S1pr1	ENSMUSG00000045092	protein_coding	exon	chr3-115714709-115715055	chr3-115768447-115769425	53391
chr8-68983500-68983973	1.31568e-06	-0.518294	0.017	0.106	0.281476	ENSMUST00000037478	Slc18a1	ENSMUSG00000036330	protein_coding	utr	chr8-69037711-69038794	chr8-68983500-68983973	53737
chr5-33689221-33690227	1.41589e-06	-0.52722	0.11	0.275	0.302916	ENSMUST00000079534	Tacc3	ENSMUSG00000037313	protein_coding	utr	chr5-33678620-33678995	chr5-33689221-33690227	10225
chr10-70183123-70183891	1.42527e-06	-0.404471	0.052	0.187	0.304923	ENSMUST00000156001	Ccdc6	ENSMUSG00000048701	protein_coding	gap	chr10-70182261-70187690	chr10-70183123-70183891	0
chr14-20097936-20098464	1.52571e-06	-0.462229	0.028	0.129	0.32641	ENSMUST00000059666	Saysd1	ENSMUSG00000045107	protein_coding	exon	chr14-20082878-20083172	chr14-20097936-20098464	14763
chr19-21912653-21914426	1.55926e-06	-0.39419	0.125	0.318	0.333588	ENSMUST00000096194	Tmem2	ENSMUSG00000024754	protein_coding	utr	chr19-21856352-21858327	chr19-21912653-21914426	54325
chr2-9530293-9531095	1.72666e-06	-0.5449	0.053	0.187	0.369401	ENSMUST00000128180	Gm13218	ENSMUSG00000079603	lincRNA	exon	chr2-9591219-9591346	chr2-9530293-9531095	60123
chr2-13329739-13330586	1.75619e-06	0.173211	0.055	0.025	0.37572	ENSMUST00000091436	Cubn	ENSMUSG00000026726	protein_coding	gap	chr2-13326828-13331480	chr2-13329739-13330586	0
chr17-34967635-34970004	1.77324e-06	0.219893	0.148	0.081	0.379368	ENSMUST00000087328	Hspa1a	ENSMUSG00000091971	protein_coding	cds	chr17-34970000-34971925	chr17-34967635-34970004	0
chr1-90103648-90104400	1.92399e-06	-0.535321	0.017	0.114	0.411618	ENSMUST00000113094	Iqca	ENSMUSG00000026301	protein_coding	cds	chr1-90103823-90103907	chr1-90103648-90104400	0
chr17-64608937-64609597	2.2588e-06	-0.317747	0.008	0.083	0.483247	ENSMUST00000086723	Man2a1	ENSMUSG00000024085	protein_coding	gap	chr17-64601871-64624527	chr17-64608937-64609597	0
chr4-135286686-135287376	2.41932e-06	-0.439167	0.08	0.242	0.517589	ENSMUST00000037099	Clic4	ENSMUSG00000037242	protein_coding	exon	chr4-135272518-135272814	chr4-135286686-135287376	13871
chr6-55327297-55327894	2.4477e-06	-0.562036	0.078	0.227	0.523661	ENSMUST00000053094	Fam188b	ENSMUSG00000038022	protein_coding	utr	chr6-55318312-55320222	chr6-55327297-55327894	7074
chr8-110941368-110941866	2.82309e-06	-0.438868	0.043	0.164	0.603972	ENSMUST00000141464	St3gal2	ENSMUSG00000031749	protein_coding	gap	chr8-110932006-110956757	chr8-110941368-110941866	0
chr9-21723085-21724601	2.85227e-06	0.13528	0.212	0.205	0.610215	ENSMUST00000034713	Ldlr	ENSMUSG00000032193	protein_coding	cds	chr9-21723778-21723844	chr9-21723085-21724601	0
chr3-98373975-98375216	3.03026e-06	-0.418326	0.047	0.167	0.648294	ENSMUST00000056096	Zfp697	ENSMUSG00000050064	protein_coding	exon	chr3-98382481-98382578	chr3-98373975-98375216	7264
chr12-83947218-83947736	3.09777e-06	-0.561157	0.068	0.217	0.662738	ENSMUST00000053744	2410016O06Rik	ENSMUSG00000046791	protein_coding	exon	chr12-83950608-83952953	chr12-83947218-83947736	2871
chr8-114814808-114815894	4.18831e-06	-0.293357	0.045	0.187	0.896048	ENSMUST00000162052	Wwox	ENSMUSG00000004637	protein_coding	gap	chr8-114712252-115133597	chr8-114814808-114815894	0
chr18-65120126-65120653	5.16911e-06	-0.495669	0.022	0.119	1	ENSMUST00000163516	Nedd4l	ENSMUSG00000024589	protein_coding	gap	chr18-65080072-65143795	chr18-65120126-65120653	0
chr15-6259665-6260729	5.50011e-06	0.317931	0.157	0.086	1	ENSMUST00000078019	Dab2	ENSMUSG00000022150	protein_coding	exon	chr15-6299788-6299899	chr15-6259665-6260729	39058
chr6-54084967-54085341	5.52327e-06	-0.448965	0.025	0.111	1	ENSMUST00000133315	Chn2	ENSMUSG00000004633	protein_coding	gap	chr6-54040156-54173463	chr6-54084967-54085341	0
chr3-37757765-37759181	6.15353e-06	-0.368068	0.107	0.285	1	ENSMUST00000099128	Gm5148	ENSMUSG00000058174	protein_coding	exon	chr3-37724203-37724490	chr3-37757765-37759181	33274
chr3-87986658-87988326	6.59516e-06	-0.319119	0.168	0.364	1	ENSMUST00000090971	Bcan	ENSMUSG00000004892	protein_coding	cds	chr3-87988272-87988462	chr3-87986658-87988326	0
chr3-149330765-149330976	6.83948e-06	-0.488178	0.027	0.124	1	ENSMUST00000180599	Gm10287	ENSMUSG00000070342	lincRNA	exon	chr3-149221687-149225745	chr3-149330765-149330976	105019
chr10-66911154-66912014	6.94773e-06	-0.4595	0.112	0.283	1	ENSMUST00000181710	1110002J07Rik	ENSMUSG00000097134	lincRNA	exon	chr10-66912489-66913672	chr10-66911154-66912014	474
chr11-99127857-99128214	7.13951e-06	-0.465084	0.047	0.174	1	ENSMUST00000103134	Ccr7	ENSMUSG00000037944	protein_coding	utr	chr11-99144196-99144957	chr11-99127857-99128214	15981
chr12-118367057-118367704	7.56422e-06	-0.338078	0.01	0.088	1	ENSMUST00000026367	Sp4	ENSMUSG00000025323	protein_coding	exon	chr12-118301227-118301440	chr12-118367057-118367704	65616
chr2-159168479-159169221	7.78191e-06	-0.527152	0.078	0.217	1	ENSMUST00000109478	Dhx35	ENSMUSG00000027655	protein_coding	utr	chr2-158857125-158858214	chr2-159168479-159169221	310264
chr18-55095645-55096507	8.3829e-06	-0.552536	0.062	0.199	1	ENSMUST00000181765	Gm4221	ENSMUSG00000096948	lincRNA	exon	chr18-55076479-55079414	chr18-55095645-55096507	16230
chr4-56113112-56114280	8.85705e-06	-0.351843	0.168	0.354	1	ENSMUST00000128591	2310081O03Rik	ENSMUSG00000085020	lincRNA	exon	chr4-56220617-56220816	chr4-56113112-56114280	106336
chr6-89081693-89082235	8.86965e-06	-0.420959	0.007	0.071	1	ENSMUST00000168837	4933427D06Rik	ENSMUSG00000055403	protein_coding	gap	chr6-88950714-89101509	chr6-89081693-89082235	0
chr17-15177132-15177730	8.98918e-06	-0.513667	0.027	0.124	1	ENSMUST00000181658	Gm5091	ENSMUSG00000097624	lincRNA	exon	chr17-15231585-15232411	chr17-15177132-15177730	53854
chr2-158004391-158004981	9.09757e-06	-0.444459	0.013	0.098	1	ENSMUST00000126541	Tti1	ENSMUSG00000027650	protein_coding	gap	chr2-158000809-158007018	chr2-158004391-158004981	0
chr6-61179752-61181417	9.41834e-06	-0.328625	0.09	0.227	1	ENSMUST00000126214	Ccser1	ENSMUSG00000039578	protein_coding	utr	chr6-61180324-61180653	chr6-61179752-61181417	0
chr12-102453334-102454096	9.43647e-06	0.102326	0.113	0.104	1	ENSMUST00000021607	Lgmn	ENSMUSG00000021190	protein_coding	exon	chr12-102439631-102439813	chr12-102453334-102454096	13520
chr9-34993350-34994256	9.46407e-06	-0.441298	0.107	0.27	1	ENSMUST00000190549	Kirrel3	ENSMUSG00000032036	protein_coding	gap	chr9-34991093-35000854	chr9-34993350-34994256	0
chr14-8342646-8342991	9.68688e-06	-0.507268	0.037	0.144	1	ENSMUST00000022269	Oit1	ENSMUSG00000021749	protein_coding	utr	chr14-8348948-8349276	chr14-8342646-8342991	5956
chr5-92234784-92235801	1.00467e-05	-0.444026	0.045	0.159	1	ENSMUST00000031359	Ppef2	ENSMUSG00000029410	protein_coding	cds	chr5-92235732-92235917	chr5-92234784-92235801	0
chr7-139366601-139366802	1.12393e-05	-0.365839	0.008	0.083	1	ENSMUST00000106098	Inpp5a	ENSMUSG00000025477	protein_coding	exon	chr7-139389109-139389464	chr7-139366601-139366802	22306
chr13-23738178-23740563	1.20311e-05	0.12886	0.4	0.381	1	ENSMUST00000040914	Hist1h1c	ENSMUSG00000036181	protein_coding	cds	chr13-23738849-23739487	chr13-23738178-23740563	0
chr19-34049333-34049957	1.37028e-05	-0.478461	0.015	0.098	1	ENSMUST00000054260	Lipk	ENSMUSG00000024771	protein_coding	utr	chr19-34047016-34047903	chr19-34049333-34049957	1429
chr4-57678948-57679411	1.3737e-05	-0.546315	0.08	0.225	1	ENSMUST00000150412	Palm2Akap2	ENSMUSG00000089945	protein_coding	gap	chr4-57648121-57688415	chr4-57678948-57679411	0
chr8-8809155-8809727	1.52782e-05	-0.496228	0.018	0.109	1	ENSMUST00000048545	Arglu1	ENSMUSG00000040459	protein_coding	exon	chr8-8689977-8690537	chr8-8809155-8809727	118617
chr15-83679567-83680577	1.64595e-05	-0.355907	0.027	0.126	1	ENSMUST00000171496	Scube1	ENSMUSG00000016763	protein_coding	gap	chr15-83677041-83703417	chr15-83679567-83680577	0
chr4-118394586-118394801	1.75279e-05	0.328533	0.077	0.028	1	ENSMUST00000075406	Szt2	ENSMUSG00000033253	protein_coding	gap	chr4-118394031-118397612	chr4-118394586-118394801	0
chr9-65550267-65551439	1.84196e-05	0.167053	0.23	0.197	1	ENSMUST00000068944	Plekho2	ENSMUSG00000050721	protein_coding	utr	chr9-65554386-65556077	chr9-65550267-65551439	2946
chr12-58268195-58269726	1.86326e-05	-0.461727	0.138	0.308	1	ENSMUST00000062254	Clec14a	ENSMUSG00000045930	protein_coding	cds	chr12-58267455-58268834	chr12-58268195-58269726	0
chr8-120830612-120831161	2.04187e-05	-0.534337	0.092	0.24	1	ENSMUST00000127664	Gm20388	ENSMUSG00000092329	protein_coding	gap	chr8-119910940-124295357	chr8-120830612-120831161	0
chr10-62247469-62248175	2.0846e-05	-0.338102	0.01	0.086	1	ENSMUST00000020278	Tacr2	ENSMUSG00000020081	protein_coding	exon	chr10-62252438-62253209	chr10-62247469-62248175	4262
chr6-115212001-115213450	2.20039e-05	0.292616	0.138	0.081	1	ENSMUST00000169345	Syn2	ENSMUSG00000009394	protein_coding	gap	chr6-115135461-115236013	chr6-115212001-115213450	0
chr9-107701642-107702033	2.21384e-05	-0.352047	0.018	0.093	1	ENSMUST00000194039	Sema3f	ENSMUSG00000034684	protein_coding	gap	chr9-107692717-107705430	chr9-107701642-107702033	0
chr15-98295642-98296425	2.54359e-05	-0.324554	0.012	0.086	1	ENSMUST00000169721	Zfp641	ENSMUSG00000022987	protein_coding	utr	chr15-98296055-98296083	chr15-98295642-98296425	0
chrX-13469081-13469962	2.55054e-05	-0.301379	0.028	0.131	1	ENSMUST00000050434	Nyx	ENSMUSG00000051228	protein_coding	gap	chrX-13468215-13485930	chrX-13469081-13469962	0
chr8-36636819-36637260	2.55892e-05	-0.506083	0.032	0.131	1	ENSMUST00000163663	Dlc1	ENSMUSG00000031523	protein_coding	gap	chr8-36599441-36763644	chr8-36636819-36637260	0
chr11-114724794-114725566	2.59049e-05	0.26885	0.11	0.058	1	ENSMUST00000151053	Dnaic2	ENSMUSG00000034706	protein_coding	exon	chr11-114727408-114727484	chr11-114724794-114725566	1841
chr16-30491586-30492115	2.59973e-05	-0.468274	0.04	0.146	1	ENSMUST00000089775	Tmem44	ENSMUSG00000022537	protein_coding	utr	chr16-30511855-30514822	chr16-30491586-30492115	19739
chr1-4571330-4572162	2.63049e-05	-0.401449	0.188	0.361	1	ENSMUST00000195771	RP23-37D15.1	ENSMUSG00000104328	lincRNA	exon	chr1-4583129-4585585	chr1-4571330-4572162	10966
chr1-192484862-192485573	2.70134e-05	-0.494528	0.027	0.114	1	ENSMUST00000151152	Kcnh1	ENSMUSG00000058248	protein_coding	gap	chr1-192453703-192505263	chr1-192484862-192485573	0
chr8-56335459-56335981	2.78346e-05	-0.421189	0.018	0.091	1	ENSMUST00000034026	Hpgd	ENSMUSG00000031613	protein_coding	utr	chr8-56320206-56321046	chr8-56335459-56335981	14412
chr8-71516814-71517115	2.83844e-05	-0.502806	0.017	0.104	1	ENSMUST00000048452	Plvap	ENSMUSG00000034845	protein_coding	exon	chr8-71511351-71511769	chr8-71516814-71517115	5044
chr11-73048908-73049628	2.84534e-05	0.138851	0.065	0.04	1	ENSMUST00000151823	1200014J11Rik	ENSMUSG00000020783	protein_coding	gap	chr11-73048083-73049858	chr11-73048908-73049628	0
chr8-83824904-83825508	2.85888e-05	-0.513898	0.042	0.144	1	ENSMUST00000181723	Gm26721	ENSMUSG00000096943	lincRNA	exon	chr8-83887079-83887557	chr8-83824904-83825508	61570
chr8-121375838-121376948	2.86993e-05	0.339191	0.378	0.265	1	ENSMUST00000127664	Gm20388	ENSMUSG00000092329	protein_coding	gap	chr8-119910940-124295357	chr8-121375838-121376948	0
chr8-54393408-54394139	2.94839e-05	-0.548241	0.052	0.179	1	ENSMUST00000067476	Spcs3	ENSMUSG00000054408	protein_coding	utr	chr8-54520433-54523262	chr8-54393408-54394139	126293
chr16-28881593-28882081	3.01569e-05	-0.404248	0.017	0.093	1	ENSMUST00000100023	Mb21d2	ENSMUSG00000051065	protein_coding	gap	chr16-28829010-28929452	chr16-28881593-28882081	0
chr2-155369118-155369932	3.28518e-05	-0.388223	0.062	0.187	1	ENSMUST00000151466	Trp53inp2	ENSMUSG00000038375	protein_coding	exon	chr2-155381059-155381192	chr2-155369118-155369932	11126
chr15-74909418-74910250	3.42949e-05	-0.428245	0.082	0.235	1	ENSMUST00000190826	2010109I03Rik	ENSMUSG00000063522	protein_coding	exon	chr15-74896956-74897021	chr15-74909418-74910250	12396
chr6-99011807-99012333	3.52601e-05	-0.458088	0.105	0.25	1	ENSMUST00000177507	Foxp1	ENSMUSG00000030067	protein_coding	gap	chr6-99010058-99015423	chr6-99011807-99012333	0
chr11-101230915-101232518	3.58056e-05	-0.373042	0.167	0.343	1	ENSMUST00000107284	Ezh1	ENSMUSG00000006920	protein_coding	exon	chr11-101226396-101226463	chr11-101230915-101232518	4451
chr10-13090330-13091246	3.71006e-05	-0.293417	0.037	0.136	1	ENSMUST00000143582	Plagl1	ENSMUSG00000019817	protein_coding	utr	chr10-13091013-13091020	chr10-13090330-13091246	0
chr5-143571843-143572625	3.74163e-05	-0.412229	0.098	0.25	1	ENSMUST00000119488	Fam220a	ENSMUSG00000083012	protein_coding	utr	chr5-143562778-143564531	chr5-143571843-143572625	7311
chr13-6059375-6060538	3.74593e-05	0.175385	0.075	0.038	1	ENSMUST00000000080	Klf6	ENSMUSG00000000078	protein_coding	utr	chr13-5867284-5870393	chr13-6059375-6060538	188981
chr5-35794962-35796027	3.77561e-05	0.303952	0.152	0.088	1	ENSMUST00000129347	Ablim2	ENSMUSG00000029095	protein_coding	gap	chr5-35758061-35798452	chr5-35794962-35796027	0
chr10-59973941-59975390	3.9645e-05	0.167657	0.3	0.263	1	ENSMUST00000182898	Anapc16	ENSMUSG00000020107	protein_coding	utr	chr10-59987409-59988722	chr10-59973941-59975390	12018
chr8-8994446-8995054	4.21287e-05	-0.468295	0.132	0.288	1	ENSMUST00000110969	Fam155a	ENSMUSG00000079157	protein_coding	utr	chr8-9206001-9207742	chr8-8994446-8995054	210946
chr12-54191037-54192603	4.55984e-05	0.157441	0.12	0.101	1	ENSMUST00000039516	Egln3	ENSMUSG00000035105	protein_coding	gap	chr12-54185661-54203204	chr12-54191037-54192603	0
chr2-38822854-38824459	4.84677e-05	0.15382	0.117	0.091	1	ENSMUST00000142130	Nr6a1	ENSMUSG00000063972	protein_coding	gap	chr2-38760430-38885195	chr2-38822854-38824459	0
chr8-105596155-105597105	5.0118e-05	-0.299593	0.175	0.359	1	ENSMUST00000194091	Agrp	ENSMUSG00000005705	protein_coding	gap	chr8-105584378-105637279	chr8-105596155-105597105	0
chr17-86476577-86477040	5.0743e-05	-0.485088	0.03	0.126	1	ENSMUST00000097275	Prkce	ENSMUSG00000045038	protein_coding	cds	chr17-86476806-86476891	chr17-86476577-86477040	0
chr15-11801829-11802675	5.27799e-05	-0.504819	0.058	0.197	1	ENSMUST00000066529	Npr3	ENSMUSG00000022206	protein_coding	utr	chr15-11839896-11845176	chr15-11801829-11802675	37220
chr13-45274329-45275283	5.36429e-05	-0.403475	0.017	0.091	1	ENSMUST00000038275	Mylip	ENSMUSG00000038175	protein_coding	exon	chr13-45389742-45390043	chr13-45274329-45275283	114458
chr16-33676209-33678409	5.56522e-05	-0.31054	0.145	0.295	1	ENSMUST00000152782	Heg1	ENSMUSG00000075254	protein_coding	exon	chr16-33684466-33684855	chr16-33676209-33678409	6056
chr19-56613994-56614497	5.92615e-05	-0.384056	0.012	0.076	1	ENSMUST00000071423	Nhlrc2	ENSMUSG00000025078	protein_coding	utr	chr19-56597513-56598846	chr19-56613994-56614497	15147
chr16-17560965-17562220	5.94714e-05	0.113899	0.057	0.033	1	ENSMUST00000171002	P2rx6	ENSMUSG00000022758	protein_coding	cds	chr16-17562014-17562183	chr16-17560965-17562220	0
chr5-35006191-35006964	6.01175e-05	-0.241488	0.005	0.061	1	ENSMUST00000156339	Rgs12	ENSMUSG00000029101	protein_coding	gap	chr5-34999230-35019342	chr5-35006191-35006964	0
chr2-127340955-127341656	6.15859e-05	0.190523	0.14	0.088	1	ENSMUST00000179618	Astl	ENSMUSG00000050468	protein_coding	utr	chr2-127341644-127341751	chr2-127340955-127341656	0
chr5-143574191-143575104	6.16922e-05	-0.45429	0.08	0.222	1	ENSMUST00000119488	Fam220a	ENSMUSG00000083012	protein_coding	utr	chr5-143562778-143564531	chr5-143574191-143575104	9659
chr18-38795457-38796326	6.20937e-05	-0.449839	0.047	0.154	1	ENSMUST00000148850	Arhgap26	ENSMUSG00000036452	protein_coding	gap	chr18-38676806-38933792	chr18-38795457-38796326	0
chr6-50972944-50974144	6.89504e-05	-0.243941	0.008	0.066	1	ENSMUST00000187879	Gm29004	ENSMUSG00000099538	lincRNA	exon	chr6-51003175-51003904	chr6-50972944-50974144	29030
chr11-62560557-62560900	7.16104e-05	0.175391	0.058	0.02	1	ENSMUST00000019649	Ubb	ENSMUSG00000019505	protein_coding	utr	chr11-62553064-62553213	chr11-62560557-62560900	7343
chr2-7241448-7242499	7.19207e-05	-0.259412	0.01	0.068	1	ENSMUST00000182404	Celf2	ENSMUSG00000002107	protein_coding	gap	chr2-7185511-7395857	chr2-7241448-7242499	0
chr13-47479965-47480511	7.26343e-05	-0.447758	0.017	0.091	1	ENSMUST00000110111	Rnf144b	ENSMUSG00000038068	protein_coding	utr	chr13-47244502-47247991	chr13-47479965-47480511	231973
chr12-35021193-35021696	7.31491e-05	-0.344923	0.028	0.134	1	ENSMUST00000048519	Snx13	ENSMUSG00000020590	protein_coding	exon	chr12-35047189-35047411	chr12-35021193-35021696	25492
chr9-102777466-102778563	7.4471e-05	-0.447209	0.11	0.26	1	ENSMUST00000191398	Gm28621	ENSMUSG00000100924	lincRNA	exon	chr9-102771551-102771810	chr9-102777466-102778563	5655
chr2-28173111-28174006	7.64675e-05	0.299691	0.117	0.058	1	ENSMUST00000113920	Olfm1	ENSMUSG00000026833	protein_coding	exon	chr2-28192992-28193462	chr2-28173111-28174006	18985
chr1-82973932-82974668	7.83496e-05	-0.376377	0.045	0.144	1	ENSMUST00000045560	Slc19a3	ENSMUSG00000038496	protein_coding	utr	chr1-83012523-83013818	chr1-82973932-82974668	37854
chr3-95995145-95996336	7.88994e-05	-0.275278	0.067	0.21	1	ENSMUST00000143485	Plekho1	ENSMUSG00000015745	protein_coding	cds	chr3-95995771-95995797	chr3-95995145-95996336	0
chr17-86815071-86815579	7.93974e-05	-0.484333	0.035	0.139	1	ENSMUST00000024954	Epas1	ENSMUSG00000024140	protein_coding	gap	chr17-86809790-86818354	chr17-86815071-86815579	0
chr2-61012748-61013312	8.30351e-05	-0.316349	0.005	0.061	1	ENSMUST00000146034	Gm13582	ENSMUSG00000075325	lincRNA	exon	chr2-60975057-60975151	chr2-61012748-61013312	37596
chr10-60928245-60928937	8.39884e-05	0.352018	0.337	0.232	1	ENSMUST00000036304	Pldi	ENSMUSG00000037247	lincRNA	gap	chr10-60928807-60929314	chr10-60928245-60928937	0
chr13-9547674-9548214	8.47085e-05	0.275308	0.053	0.008	1	ENSMUST00000174552	Dip2c	ENSMUSG00000048264	protein_coding	gap	chr13-9536866-9550183	chr13-9547674-9548214	0
chr8-89685412-89686104	8.63476e-05	-0.471374	0.028	0.116	1	ENSMUST00000177870	Gm6625	ENSMUSG00000094790	protein_coding	exon	chr8-89146747-89147247	chr8-89685412-89686104	538164
chr19-40402053-40402855	8.97104e-05	-0.375117	0.043	0.162	1	ENSMUST00000165469	Sorbs1	ENSMUSG00000025006	protein_coding	cds	chr19-40402258-40402267	chr19-40402053-40402855	0
chr12-21229154-21229358	8.99074e-05	-0.377745	0.01	0.068	1	ENSMUST00000101562	Asap2	ENSMUSG00000052632	protein_coding	cds	chr12-21229239-21229287	chr12-21229154-21229358	0
chrX-161716716-161718024	8.99298e-05	-0.349555	0.043	0.134	1	ENSMUST00000112338	Rai2	ENSMUSG00000043518	protein_coding	utr	chrX-161717069-161717267	chrX-161716716-161718024	0
chr1-171262476-171263950	9.26553e-05	0.229006	0.267	0.212	1	ENSMUST00000111315	Adamts4	ENSMUSG00000006403	protein_coding	utr	chr1-171259179-171260637	chr1-171262476-171263950	1838
chr7-4532000-4532694	9.46058e-05	0.224814	0.142	0.104	1	ENSMUST00000094897	Dnaaf3	ENSMUSG00000055809	protein_coding	cds	chr7-4532187-4532271	chr7-4532000-4532694	0
chr7-136502309-136502871	9.72936e-05	0.394068	0.195	0.114	1	ENSMUST00000081510	Mgmt	ENSMUSG00000054612	protein_coding	exon	chr7-136894611-136894687	chr7-136502309-136502871	391739
chr1-64040872-64041426	9.7508e-05	-0.45299	0.057	0.167	1	ENSMUST00000114086	Klf7	ENSMUSG00000025959	protein_coding	gap	chr1-64035765-64042313	chr1-64040872-64041426	0
chr5-118980975-118981508	9.93392e-05	-0.501448	0.032	0.134	1	ENSMUST00000190550	1700081H04Rik	ENSMUSG00000100573	lincRNA	exon	chr5-119108234-119108715	chr5-118980975-118981508	126725
chr18-24204860-24206685	0.000100938	-0.239091	0.207	0.381	1	ENSMUST00000170243	Galnt1	ENSMUSG00000000420	protein_coding	utr	chr18-24205767-24206080	chr18-24204860-24206685	0
chr15-59248505-59249297	0.000103692	-0.414037	0.037	0.149	1	ENSMUST00000162142	Sqle	ENSMUSG00000022351	protein_coding	exon	chr15-59315077-59316129	chr15-59248505-59249297	65779
chr13-114885104-114885577	0.000106087	-0.334941	0.02	0.109	1	ENSMUST00000056117	Itga2	ENSMUSG00000015533	protein_coding	gap	chr13-114884528-114886579	chr13-114885104-114885577	0
chr2-163233624-163233853	0.000107633	-0.359928	0.01	0.068	1	ENSMUST00000165937	Tox2	ENSMUSG00000074607	protein_coding	gap	chr2-163225588-163247766	chr2-163233624-163233853	0
chr9-120398266-120398680	0.000107999	-0.380823	0.013	0.071	1	ENSMUST00000133173	Myrip	ENSMUSG00000041794	protein_coding	gap	chr9-120388334-120417139	chr9-120398266-120398680	0
chr1-89467591-89468078	0.000108372	-0.463053	0.047	0.154	1	ENSMUST00000190096	Agap1	ENSMUSG00000055013	protein_coding	gap	chr1-89455593-89604597	chr1-89467591-89468078	0
chr14-79034381-79034888	0.000109739	-0.403938	0.027	0.121	1	ENSMUST00000040990	Vwa8	ENSMUSG00000058997	protein_coding	gap	chr14-79026078-79038124	chr14-79034381-79034888	0
chr1-53970236-53970908	0.000113499	-0.354587	0.012	0.083	1	ENSMUST00000146850	Hecw2	ENSMUSG00000042807	protein_coding	gap	chr1-53950922-54040200	chr1-53970236-53970908	0
chr1-90490133-90490691	0.000113961	-0.486075	0.077	0.197	1	ENSMUST00000187630	Gm28722	ENSMUSG00000101997	lincRNA	exon	chr1-90454337-90454501	chr1-90490133-90490691	35631
chr2-146560428-146561058	0.000115484	-0.456353	0.037	0.152	1	ENSMUST00000147212	4933406D12Rik	ENSMUSG00000085796	lincRNA	exon	chr2-146545684-146546108	chr2-146560428-146561058	14319
chr8-120407500-120408576	0.000115702	-0.359141	0.083	0.212	1	ENSMUST00000180448	Gse1	ENSMUSG00000031822	protein_coding	gap	chr8-120354180-120553583	chr8-120407500-120408576	0
chr1-136178682-136179038	0.000115864	-0.34943	0.033	0.131	1	ENSMUST00000130864	Kif21b	ENSMUSG00000041642	protein_coding	utr	chr1-136174037-136177998	chr1-136178682-136179038	683
chr13-113854799-113855261	0.000118993	-0.383799	0.015	0.086	1	ENSMUST00000091201	Arl15	ENSMUSG00000042348	protein_coding	gap	chr13-113794697-113922246	chr13-113854799-113855261	0
chr5-114689339-114691406	0.000123364	0.12278	0.3	0.303	1	ENSMUST00000112214	Gltp	ENSMUSG00000011884	protein_coding	cds	chr5-114690759-114690861	chr5-114689339-114691406	0
chr6-6779016-6779423	0.000123645	0.398686	0.088	0.028	1	ENSMUST00000160937	Dlx6	ENSMUSG00000029754	protein_coding	exon	chr6-6863334-6863827	chr6-6779016-6779423	83910
chr2-135561633-135563018	0.000126652	-0.340768	0.108	0.263	1	ENSMUST00000146980	Gm14074	ENSMUSG00000084762	lincRNA	exon	chr2-135648907-135648971	chr2-135561633-135563018	85888
chr8-68206439-68207414	0.00012772	-0.316562	0.03	0.119	1	ENSMUST00000181816	Gm26659	ENSMUSG00000097609	lincRNA	exon	chr8-68218173-68220868	chr8-68206439-68207414	10758
chr18-75284345-75284653	0.000130166	-0.42771	0.05	0.159	1	ENSMUST00000039608	Dym	ENSMUSG00000035765	protein_coding	gap	chr18-75243399-75286619	chr18-75284345-75284653	0
chr2-5595642-5595973	0.000132899	-0.353538	0.017	0.076	1	ENSMUST00000155927	Camk1d	ENSMUSG00000039145	protein_coding	gap	chr2-5565781-5714145	chr2-5595642-5595973	0
chr9-32901079-32901793	0.00013491	-0.395224	0.163	0.336	1	ENSMUST00000185169	Gm27162	ENSMUSG00000099025	lincRNA	exon	chr9-32904937-32907042	chr9-32901079-32901793	3143
chr15-81247423-81248415	0.000136049	-0.365615	0.038	0.129	1	ENSMUST00000166855	Mchr1	ENSMUSG00000050164	protein_coding	utr	chr15-81238113-81238963	chr15-81247423-81248415	8459
chr10-31592120-31593520	0.000137472	-0.242225	0.018	0.078	1	ENSMUST00000081989	Rnf217	ENSMUSG00000063760	protein_coding	gap	chr10-31534897-31608383	chr10-31592120-31593520	0
chr19-24122936-24123417	0.000138	-0.38437	0.012	0.081	1	ENSMUST00000099558	Tjp2	ENSMUSG00000024812	protein_coding	gap	chr19-24122372-24124567	chr19-24122936-24123417	0
chr14-76504028-76504695	0.000139693	-0.273964	0.168	0.336	1	ENSMUST00000177207	Tsc22d1	ENSMUSG00000022010	protein_coding	utr	chr14-76504214-76504293	chr14-76504028-76504695	0
chr3-98012821-98014270	0.000141363	-0.224395	0.193	0.366	1	ENSMUST00000079812	Notch2	ENSMUSG00000027878	protein_coding	cds	chr3-98013699-98013771	chr3-98012821-98014270	0
chr9-108577924-108579176	0.000141911	0.127784	0.232	0.23	1	ENSMUST00000068700	Wdr6	ENSMUSG00000066357	protein_coding	cds	chr9-108578494-108578593	chr9-108577924-108579176	0
chr8-35650607-35651460	0.000143374	-0.207374	0.008	0.056	1	ENSMUST00000154989	Mfhas1	ENSMUSG00000070056	protein_coding	gap	chr8-35607425-35664667	chr8-35650607-35651460	0
chr7-83882852-83884799	0.000145392	-0.225394	0.337	0.503	1	ENSMUST00000094216	Mesdc1	ENSMUSG00000070462	protein_coding	cds	chr7-83882133-83883221	chr7-83882852-83884799	0
chr11-76242578-76244100	0.000147249	0.16331	0.167	0.164	1	ENSMUST00000170710	Glod4	ENSMUSG00000017286	protein_coding	cds	chr11-76242994-76243026	chr11-76242578-76244100	0
chr5-124172922-124174109	0.000148512	0.223708	0.103	0.066	1	ENSMUST00000162812	Pitpnm2	ENSMUSG00000029406	protein_coding	gap	chr5-124152720-124216315	chr5-124172922-124174109	0
chr18-65136570-65137198	0.00014878	-0.383497	0.017	0.083	1	ENSMUST00000163516	Nedd4l	ENSMUSG00000024589	protein_coding	gap	chr18-65080072-65143795	chr18-65136570-65137198	0
chr18-4368977-4369451	0.000149184	0.12903	0.05	0.033	1	ENSMUST00000180970	Gm26865	ENSMUSG00000097641	lincRNA	exon	chr18-4373669-4376738	chr18-4368977-4369451	4217
chr18-62780359-62780977	0.000149661	-0.291231	0.032	0.104	1	ENSMUST00000048109	2700046A07Rik	ENSMUSG00000041789	lincRNA	exon	chr18-62755924-62756347	chr18-62780359-62780977	24011
chr4-100223648-100223897	0.000153424	-0.408567	0.018	0.088	1	ENSMUST00000039630	Ror1	ENSMUSG00000035305	protein_coding	gap	chr4-100096310-100302879	chr4-100223648-100223897	0
chr17-56169752-56170347	0.00015676	0.273006	0.22	0.174	1	ENSMUST00000077788	Tnfaip8l1	ENSMUSG00000044469	protein_coding	gap	chr17-56162607-56171706	chr17-56169752-56170347	0
chr3-62418098-62418658	0.000156835	-0.437539	0.013	0.091	1	ENSMUST00000079300	Arhgef26	ENSMUSG00000036885	protein_coding	gap	chr3-62380992-62419548	chr3-62418098-62418658	0
chr18-38716548-38716886	0.000158509	-0.45961	0.017	0.096	1	ENSMUST00000148850	Arhgap26	ENSMUSG00000036452	protein_coding	gap	chr18-38676806-38933792	chr18-38716548-38716886	0
chr2-148395589-148396036	0.000164172	-0.308555	0.048	0.144	1	ENSMUST00000109962	Sstr4	ENSMUSG00000037014	protein_coding	cds	chr2-148395471-148396628	chr2-148395589-148396036	0
chr3-116951434-116952007	0.000177347	-0.373913	0.018	0.081	1	ENSMUST00000143611	Palmd	ENSMUSG00000033377	protein_coding	gap	chr3-116948036-116953056	chr3-116951434-116952007	0
chr2-172206837-172207356	0.000177753	0.230425	0.058	0.023	1	ENSMUST00000038532	Mc3r	ENSMUSG00000038537	protein_coding	exon	chr2-172248492-172251114	chr2-172206837-172207356	41135
chr1-34288639-34289424	0.000179161	0.298059	0.11	0.053	1	ENSMUST00000185269	Dst	ENSMUSG00000026131	protein_coding	gap	chr1-34288020-34289523	chr1-34288639-34289424	0
chr5-121586106-121587029	0.000181014	-0.286972	0.093	0.258	1	ENSMUST00000152945	Aldh2	ENSMUSG00000029455	protein_coding	gap	chr5-121580719-121593361	chr5-121586106-121587029	0
chr5-66599919-66600205	0.000181633	-0.288846	0.008	0.061	1	ENSMUST00000162994	Apbb2	ENSMUSG00000029207	protein_coding	gap	chr5-66492173-66618567	chr5-66599919-66600205	0
chr5-107120846-107121471	0.000182202	-0.319268	0.02	0.086	1	ENSMUST00000136882	Tgfbr3	ENSMUSG00000029287	protein_coding	cds	chr5-107121360-107121407	chr5-107120846-107121471	0
chr8-25108594-25109469	0.000182394	-0.334805	0.07	0.207	1	ENSMUST00000064883	Plekha2	ENSMUSG00000031557	protein_coding	exon	chr8-25102034-25102194	chr8-25108594-25109469	6399
chr7-31115183-31116162	0.000189529	0.272837	0.297	0.227	1	ENSMUST00000168884	Hpn	ENSMUSG00000001249	protein_coding	utr	chr7-31115136-31115282	chr7-31115183-31116162	0
chr5-64682153-64682976	0.000190101	-0.35667	0.058	0.174	1	ENSMUST00000180650	Gm26761	ENSMUSG00000097668	lincRNA	exon	chr5-64695850-64697137	chr5-64682153-64682976	12873
chr1-184289364-184290277	0.000193026	-0.398452	0.107	0.222	1	ENSMUST00000193894	RP23-172L16.3	ENSMUSG00000102682	lincRNA	exon	chr1-184358329-184358565	chr1-184289364-184290277	68051
chr5-137671173-137672515	0.000193752	-0.322268	0.153	0.326	1	ENSMUST00000151839	Agfg2	ENSMUSG00000029722	protein_coding	gap	chr5-137667775-137684358	chr5-137671173-137672515	0
chr11-6679602-6680785	0.000198976	-0.262532	0.08	0.217	1	ENSMUST00000045374	Ramp3	ENSMUSG00000041046	protein_coding	utr	chr11-6676739-6677475	chr11-6679602-6680785	2126
chr7-19461411-19461804	0.000200246	0.116676	0.063	0.051	1	ENSMUST00000085715	Mark4	ENSMUSG00000030397	protein_coding	exon	chr7-19458444-19458494	chr7-19461411-19461804	2916
chr2-13583472-13584001	0.000200617	0.158542	0.052	0.02	1	ENSMUST00000028062	Vim	ENSMUSG00000026728	protein_coding	utr	chr2-13582515-13582826	chr2-13583472-13584001	645
chr4-47351391-47353992	0.000201442	-0.188114	0.35	0.505	1	ENSMUST00000044234	Tgfbr1	ENSMUSG00000007613	protein_coding	cds	chr4-47353312-47353396	chr4-47351391-47353992	0
chr8-120875888-120877226	0.000206247	-0.47118	0.128	0.27	1	ENSMUST00000127664	Gm20388	ENSMUSG00000092329	protein_coding	gap	chr8-119910940-124295357	chr8-120875888-120877226	0
chr4-86873542-86875003	0.000207104	-0.241414	0.273	0.455	1	ENSMUST00000084433	Acer2	ENSMUSG00000038007	protein_coding	cds	chr4-86874489-86874596	chr4-86873542-86875003	0
chr5-150468347-150468820	0.000207946	-0.401861	0.045	0.144	1	ENSMUST00000087204	Fry	ENSMUSG00000056602	protein_coding	gap	chr5-150466947-150469676	chr5-150468347-150468820	0
chr11-72537730-72538753	0.000210572	0.112191	0.092	0.086	1	ENSMUST00000092940	Spns3	ENSMUSG00000020798	protein_coding	cds	chr11-72538324-72538390	chr11-72537730-72538753	0
chr2-30391283-30393443	0.000211157	0.122426	0.447	0.432	1	ENSMUST00000155196	Dolpp1	ENSMUSG00000026856	protein_coding	cds	chr2-30392445-30392512	chr2-30391283-30393443	0
chr2-110471819-110472818	0.000213187	-0.262138	0.005	0.051	1	ENSMUST00000099626	Fibin	ENSMUSG00000074971	protein_coding	exon	chr2-110360917-110363183	chr2-110471819-110472818	108635
chr11-109347330-109348040	0.000213602	-0.304967	0.087	0.227	1	ENSMUST00000190043	1700096J18Rik	ENSMUSG00000099630	lincRNA	gap	chr11-109347053-109353383	chr11-109347330-109348040	0
chr5-105858972-105859713	0.00021377	-0.420833	0.055	0.169	1	ENSMUST00000150440	Zfp326	ENSMUSG00000029290	protein_coding	exon	chr5-105876565-105876698	chr5-105858972-105859713	16851
chr7-145024668-145024933	0.000213957	0.222992	0.08	0.051	1	ENSMUST00000093962	Ccnd1	ENSMUSG00000070348	protein_coding	exon	chr7-144939496-144939869	chr7-145024668-145024933	84798
chr17-7194014-7194488	0.000216394	-0.4555	0.03	0.124	1	ENSMUST00000024575	Rps6ka2	ENSMUSG00000023809	protein_coding	gap	chr17-7170444-7227912	chr17-7194014-7194488	0
chr16-31428368-31430251	0.000218478	0.133134	0.272	0.25	1	ENSMUST00000115227	Bdh1	ENSMUSG00000046598	protein_coding	utr	chr16-31428748-31428987	chr16-31428368-31430251	0
chr5-147659789-147660412	0.000223021	-0.378865	0.032	0.131	1	ENSMUST00000110529	Flt1	ENSMUSG00000029648	protein_coding	gap	chr5-147655212-147672563	chr5-147659789-147660412	0
chr9-64094015-64094586	0.000223111	-0.46737	0.11	0.255	1	ENSMUST00000176950	Scarletltr	ENSMUSG00000093759	processed_transcript	exon	chr9-64086853-64086961	chr9-64094015-64094586	7053
chr9-64088754-64089423	0.000230384	-0.390515	0.09	0.232	1	ENSMUST00000176950	Scarletltr	ENSMUSG00000093759	processed_transcript	exon	chr9-64086853-64086961	chr9-64088754-64089423	1792
chr16-24433202-24433828	0.00023226	-0.285655	0.017	0.081	1	ENSMUST00000038053	Lpp	ENSMUSG00000033306	protein_coding	gap	chr16-24393605-24442780	chr16-24433202-24433828	0
chr2-71756965-71757704	0.000234117	-0.363608	0.028	0.119	1	ENSMUST00000157059	Gm13662	ENSMUSG00000084794	processed_transcript	gap	chr2-71750048-71759212	chr2-71756965-71757704	0
chr4-148925515-148926802	0.000234577	-0.449343	0.107	0.253	1	ENSMUST00000147270	Casz1	ENSMUSG00000028977	protein_coding	gap	chr4-148901744-148928996	chr4-148925515-148926802	0
chr13-42565098-42566051	0.000235273	-0.469883	0.123	0.268	1	ENSMUST00000128646	Phactr1	ENSMUSG00000054728	protein_coding	exon	chr13-42680623-42680926	chr13-42565098-42566051	114571
chr11-12335957-12336555	0.000239285	-0.434854	0.043	0.144	1	ENSMUST00000174874	Cobl	ENSMUSG00000020173	protein_coding	gap	chr11-12309753-12343743	chr11-12335957-12336555	0
chr18-53263928-53264519	0.000244598	0.1146	0.062	0.043	1	ENSMUST00000165032	Snx24	ENSMUSG00000024535	protein_coding	gap	chr18-53245853-53327411	chr18-53263928-53264519	0
chr14-62492288-62492804	0.000250677	0.177253	0.053	0.03	1	ENSMUST00000191202	Gm4131	ENSMUSG00000100486	lincRNA	exon	chr14-62480800-62480891	chr14-62492288-62492804	11396
chr5-77109785-77110103	0.00025099	-0.379359	0.013	0.078	1	ENSMUST00000081964	Hopx	ENSMUSG00000059325	protein_coding	gap	chr5-77095023-77114846	chr5-77109785-77110103	0
chr4-101264311-101265741	0.00025575	-0.234144	0.193	0.359	1	ENSMUST00000149297	Jak1	ENSMUSG00000028530	protein_coding	utr	chr4-101265042-101265273	chr4-101264311-101265741	0
chr16-31943998-31944326	0.000256658	0.10092	0.058	0.056	1	ENSMUST00000052174	Pigz	ENSMUSG00000045625	protein_coding	cds	chr16-31944250-31945808	chr16-31943998-31944326	0
chr1-136732947-136733579	0.000257316	-0.389277	0.023	0.093	1	ENSMUST00000181274	Gm16880	ENSMUSG00000097448	lincRNA	exon	chr1-136724971-136726142	chr1-136732947-136733579	6804
chr11-43493861-43494304	0.000257669	0.162851	0.053	0.03	1	ENSMUST00000057679	C1qtnf2	ENSMUSG00000046491	protein_coding	utr	chr11-43491338-43491525	chr11-43493861-43494304	2335
chr2-93982192-93983295	0.000259423	-0.304429	0.03	0.116	1	ENSMUST00000183110	Gm27027	ENSMUSG00000098004	protein_coding	gap	chr2-93957528-93996182	chr2-93982192-93983295	0
chr3-57287376-57288366	0.000271855	-0.408668	0.037	0.141	1	ENSMUST00000171384	Tm4sf1	ENSMUSG00000027800	protein_coding	cds	chr3-57287756-57287770	chr3-57287376-57288366	0
chr5-143586165-143586848	0.000272751	-0.347266	0.023	0.104	1	ENSMUST00000119488	Fam220a	ENSMUSG00000083012	protein_coding	utr	chr5-143562778-143564531	chr5-143586165-143586848	21633
chr4-53111717-53112404	0.000281331	-0.24721	0.035	0.124	1	ENSMUST00000030010	Abca1	ENSMUSG00000015243	protein_coding	gap	chr4-53109286-53127596	chr4-53111717-53112404	0
chr2-167117976-167118522	0.000282625	-0.351768	0.013	0.073	1	ENSMUST00000059826	Kcnb1	ENSMUSG00000050556	protein_coding	gap	chr2-167106360-167188056	chr2-167117976-167118522	0
chr5-34183043-34183443	0.000285146	-0.366554	0.108	0.232	1	ENSMUST00000119171	Mxd4	ENSMUSG00000037235	protein_coding	gap	chr5-34178925-34187328	chr5-34183043-34183443	0
chr1-21014290-21015250	0.000285175	0.147648	0.108	0.073	1	ENSMUST00000187210	Tram2	ENSMUSG00000041779	protein_coding	gap	chr1-21013512-21037396	chr1-21014290-21015250	0
chr10-118102813-118103826	0.000286925	-0.227364	0.165	0.336	1	ENSMUST00000020437	Mdm1	ENSMUSG00000020212	protein_coding	exon	chr10-118141787-118141962	chr10-118102813-118103826	37960
chr1-36571401-36572424	0.00028848	-0.331471	0.16	0.328	1	ENSMUST00000194839	Fam178b	ENSMUSG00000046337	protein_coding	gap	chr1-36564909-36578518	chr1-36571401-36572424	0
chr14-20094906-20095263	0.000290931	-0.400913	0.018	0.091	1	ENSMUST00000059666	Saysd1	ENSMUSG00000045107	protein_coding	exon	chr14-20082878-20083172	chr14-20094906-20095263	11733
chr15-101371674-101372300	0.000292829	-0.299274	0.067	0.189	1	ENSMUST00000077196	Krt80	ENSMUSG00000037185	protein_coding	exon	chr15-101369755-101370125	chr15-101371674-101372300	1548
chr17-28217274-28218799	0.00029327	-0.224563	0.087	0.23	1	ENSMUST00000002327	Def6	ENSMUSG00000002257	protein_coding	cds	chr17-28217601-28217786	chr17-28217274-28218799	0
chr4-55650839-55652168	0.000294077	-0.256129	0.303	0.467	1	ENSMUST00000123620	Gm12506	ENSMUSG00000085375	lincRNA	exon	chr4-55636844-55636901	chr4-55650839-55652168	13937
chr17-34563930-34564440	0.000298507	-0.406789	0.06	0.169	1	ENSMUST00000173389	Notch4	ENSMUSG00000015468	protein_coding	utr	chr17-34564337-34564445	chr17-34563930-34564440	0
chr12-52390196-52390645	0.000302718	-0.385305	0.038	0.116	1	ENSMUST00000040090	Nubpl	ENSMUSG00000035142	protein_coding	utr	chr12-52310765-52312744	chr12-52390196-52390645	77451
chr15-6871624-6872434	0.00030908	-0.387448	0.045	0.159	1	ENSMUST00000177478	Osmr	ENSMUSG00000022146	protein_coding	gap	chr15-6860378-6874200	chr15-6871624-6872434	0
chr6-60943994-60944453	0.000310591	0.344492	0.095	0.043	1	ENSMUST00000145763	Mmrn1	ENSMUSG00000054641	protein_coding	gap	chr6-60929308-60944316	chr6-60943994-60944453	0
chr16-94327798-94329671	0.00031803	-0.317944	0.095	0.25	1	ENSMUST00000023660	Ripply3	ENSMUSG00000022941	protein_coding	cds	chr16-94329346-94329421	chr16-94327798-94329671	0
chr4-81177236-81179096	0.000319141	-0.396859	0.18	0.336	1	ENSMUST00000107262	Mpdz	ENSMUSG00000028402	protein_coding	utr	chr4-81278500-81279622	chr4-81177236-81179096	99403
chr14-120388815-120389608	0.000322263	0.203064	0.052	0.023	1	ENSMUST00000167459	Mbnl2	ENSMUSG00000022139	protein_coding	cds	chr14-120388900-120389163	chr14-120388815-120389608	0
chr3-149348506-149349744	0.000325471	-0.359436	0.125	0.288	1	ENSMUST00000180599	Gm10287	ENSMUSG00000070342	lincRNA	exon	chr3-149221687-149225745	chr3-149348506-149349744	122760
chr3-101507003-101507742	0.000327865	-0.362723	0.03	0.109	1	ENSMUST00000043983	Igsf3	ENSMUSG00000042035	protein_coding	utr	chr3-101460038-101463059	chr3-101507003-101507742	43943
chr2-148530386-148530907	0.000327896	-0.365247	0.05	0.172	1	ENSMUST00000129067	Gm14120	ENSMUSG00000087678	lincRNA	exon	chr2-148476067-148478780	chr2-148530386-148530907	51605
chr12-102281900-102284665	0.000329806	-0.267229	0.177	0.336	1	ENSMUST00000150795	Rin3	ENSMUSG00000044456	protein_coding	cds	chr12-102283286-102283326	chr12-102281900-102284665	0
chr17-84175152-84176522	0.000330187	0.141465	0.107	0.051	1	ENSMUST00000060366	Zfp36l2	ENSMUSG00000045817	protein_coding	utr	chr17-84183931-84185752	chr17-84175152-84176522	7408
chr4-59188476-59190177	0.000344894	-0.242404	0.177	0.356	1	ENSMUST00000030074	Ugcg	ENSMUSG00000028381	protein_coding	cds	chr4-59189644-59189741	chr4-59188476-59190177	0
chr13-110563735-110564464	0.000346016	-0.315849	0.077	0.232	1	ENSMUST00000022212	Plk2	ENSMUSG00000021701	protein_coding	utr	chr13-110400225-110400844	chr13-110563735-110564464	162890
chr14-18678201-18678778	0.00035191	0.231942	0.08	0.04	1	ENSMUST00000177398	Ube2e2	ENSMUSG00000058317	protein_coding	gap	chr14-18636281-18871493	chr14-18678201-18678778	0
chr12-87393374-87394112	0.000353667	-0.197491	0.01	0.056	1	ENSMUST00000021424	Sptlc2	ENSMUSG00000021036	protein_coding	exon	chr12-87388046-87388355	chr12-87393374-87394112	5018
chr16-89830073-89830620	0.000356091	-0.466112	0.063	0.179	1	ENSMUST00000163370	Tiam1	ENSMUSG00000002489	protein_coding	gap	chr16-89821982-89833009	chr16-89830073-89830620	0
chr16-31274177-31275596	0.000358558	-0.222374	0.193	0.371	1	ENSMUST00000115233	Ppp1r2	ENSMUSG00000047714	protein_coding	cds	chr16-31274846-31274970	chr16-31274177-31275596	0
chr13-26916280-26916878	0.000359999	0.32829	0.102	0.051	1	ENSMUST00000110369	Prl	ENSMUSG00000021342	protein_coding	exon	chr13-27057570-27057657	chr13-26916280-26916878	140691
chr12-52327552-52328822	0.000364926	-0.247147	0.01	0.061	1	ENSMUST00000040090	Nubpl	ENSMUSG00000035142	protein_coding	utr	chr12-52310765-52312744	chr12-52327552-52328822	14807
chr4-45500250-45500732	0.0003672	-0.40883	0.032	0.131	1	ENSMUST00000147448	Shb	ENSMUSG00000044813	protein_coding	gap	chr4-45489176-45532246	chr4-45500250-45500732	0
chr18-10051419-10052955	0.000368838	0.150559	0.097	0.076	1	ENSMUST00000142013	Usp14	ENSMUSG00000047879	protein_coding	exon	chr18-10044929-10045119	chr18-10051419-10052955	6299
chr19-16447724-16449191	0.000371879	-0.378985	0.045	0.149	1	ENSMUST00000025602	Gna14	ENSMUSG00000024697	protein_coding	gap	chr19-16436818-16533712	chr19-16447724-16449191	0
chr17-30901264-30901952	0.00037473	-0.307459	0.015	0.081	1	ENSMUST00000114574	Glp1r	ENSMUSG00000024027	protein_coding	cds	chr17-30901877-30901954	chr17-30901264-30901952	0
chr12-35191836-35192645	0.000378721	0.12571	0.073	0.056	1	ENSMUST00000048519	Snx13	ENSMUSG00000020590	protein_coding	utr	chr12-35144337-35147469	chr12-35191836-35192645	44366
chr1-23202268-23203298	0.000379189	-0.35934	0.062	0.172	1	ENSMUST00000182303	Gm27028	ENSMUSG00000097970	lincRNA	exon	chr1-23291537-23291935	chr1-23202268-23203298	88238
chr9-57268098-57268942	0.000383282	-0.279109	0.032	0.131	1	ENSMUST00000034846	1700017B05Rik	ENSMUSG00000032300	protein_coding	exon	chr9-57262429-57262599	chr9-57268098-57268942	5498
chr18-33431239-33431689	0.000386783	-0.375464	0.02	0.091	1	ENSMUST00000171533	Nrep	ENSMUSG00000042834	protein_coding	utr	chr18-33437019-33438713	chr18-33431239-33431689	5329
chr8-54392816-54393154	0.000387163	-0.389587	0.008	0.071	1	ENSMUST00000067476	Spcs3	ENSMUSG00000054408	protein_coding	utr	chr8-54520433-54523262	chr8-54392816-54393154	127278
chr19-60950131-60950769	0.000391681	-0.373028	0.107	0.242	1	ENSMUST00000003313	Grk5	ENSMUSG00000003228	protein_coding	gap	chr19-60890632-60987701	chr19-60950131-60950769	0
chr6-137044955-137045298	0.000391873	-0.326128	0.008	0.061	1	ENSMUST00000032347	Rerg	ENSMUSG00000030222	protein_coding	utr	chr6-137054825-137056132	chr6-137044955-137045298	9526
chr5-53961838-53962468	0.000395183	-0.433428	0.052	0.167	1	ENSMUST00000117661	Stim2	ENSMUSG00000039156	protein_coding	exon	chr5-53998417-53999034	chr5-53961838-53962468	35948
chr17-78444045-78444389	0.000395802	-0.330358	0.005	0.056	1	ENSMUST00000070039	Fez2	ENSMUSG00000056121	protein_coding	exon	chr17-78417833-78418131	chr17-78444045-78444389	25913
chr17-4777642-4778527	0.000397415	0.131176	0.053	0.033	1	ENSMUST00000124362	Arid1b	ENSMUSG00000069729	protein_coding	exon	chr17-4994332-4994399	chr17-4777642-4778527	215804
chr11-59963900-59965792	0.000399299	0.113443	0.21	0.212	1	ENSMUST00000062405	Rasd1	ENSMUSG00000049892	protein_coding	cds	chr11-59964520-59964805	chr11-59963900-59965792	0
chr1-191556965-191557474	0.000403764	0.223279	0.098	0.061	1	ENSMUST00000195765	Dtl	ENSMUSG00000037474	protein_coding	gap	chr1-191556888-191558060	chr1-191556965-191557474	0
chr19-26604392-26605409	0.000407527	-0.213646	0.253	0.432	1	ENSMUST00000176030	Smarca2	ENSMUSG00000024921	protein_coding	utr	chr19-26605119-26605233	chr19-26604392-26605409	0
chr13-46999492-47000107	0.000408334	-0.421941	0.027	0.109	1	ENSMUST00000052747	Nhlrc1	ENSMUSG00000044231	protein_coding	utr	chr13-47012558-47013573	chr13-46999492-47000107	12450
chr12-100276681-100277909	0.000413776	0.125903	0.12	0.109	1	ENSMUST00000062957	Ttc7b	ENSMUSG00000033530	protein_coding	utr	chr12-100300771-100301548	chr12-100276681-100277909	22861
chr10-83931343-83932112	0.000416598	-0.465611	0.053	0.162	1	ENSMUST00000150459	1500009L16Rik	ENSMUSG00000087651	protein_coding	utr	chr10-83761918-83762761	chr10-83931343-83932112	168581
chr17-28014676-28015846	0.000420146	-0.292586	0.153	0.328	1	ENSMUST00000139173	Anks1	ENSMUSG00000024219	protein_coding	gap	chr17-28008433-28038079	chr17-28014676-28015846	0
chr6-90987842-90989418	0.000421981	-0.273392	0.117	0.273	1	ENSMUST00000032179	Nup210	ENSMUSG00000030091	protein_coding	utr	chr6-91013068-91014398	chr6-90987842-90989418	23649
chr14-54900013-54900740	0.000422158	0.117492	0.082	0.066	1	ENSMUST00000022808	Pabpn1	ENSMUSG00000022194	protein_coding	utr	chr14-54898057-54898169	chr14-54900013-54900740	1843
chr18-38164718-38165672	0.000424373	-0.462543	0.063	0.179	1	ENSMUST00000160721	Pcdh1	ENSMUSG00000051375	protein_coding	utr	chr18-38185914-38189942	chr18-38164718-38165672	20241
chr2-148490192-148490512	0.000432613	-0.428766	0.038	0.129	1	ENSMUST00000129067	Gm14120	ENSMUSG00000087678	lincRNA	exon	chr2-148476067-148478780	chr2-148490192-148490512	11411
chr7-97385818-97387328	0.000434536	-0.199298	0.013	0.068	1	ENSMUST00000098300	Alg8	ENSMUSG00000035704	protein_coding	cds	chr7-97386802-97386941	chr7-97385818-97387328	0
chr7-34312595-34313925	0.000435632	-0.226716	0.297	0.472	1	ENSMUST00000108074	4931406P16Rik	ENSMUSG00000066571	protein_coding	utr	chr7-34313487-34313551	chr7-34312595-34313925	0
chr3-101551215-101552414	0.00044567	-0.416672	0.055	0.159	1	ENSMUST00000036493	Atp1a1	ENSMUSG00000033161	protein_coding	utr	chr3-101576219-101576555	chr3-101551215-101552414	23804
chr6-145568686-145568998	0.000448452	-0.396317	0.018	0.083	1	ENSMUST00000148739	Lmntd1	ENSMUSG00000054966	protein_coding	gap	chr6-145543505-145613890	chr6-145568686-145568998	0
chr11-101459697-101460013	0.000448975	-0.404997	0.057	0.154	1	ENSMUST00000040430	Vat1	ENSMUSG00000034993	protein_coding	utr	chr11-101458745-101460192	chr11-101459697-101460013	0
chr13-52891572-52892622	0.000467903	0.10307	0.052	0.038	1	ENSMUST00000137064	Auh	ENSMUSG00000021460	protein_coding	gap	chr13-52889196-52898649	chr13-52891572-52892622	0
chr17-13703658-13703900	0.000471065	-0.409281	0.025	0.096	1	ENSMUST00000135850	Tcte2	ENSMUSG00000038347	protein_coding	gap	chr17-13554093-13761285	chr17-13703658-13703900	0
chr17-35896646-35898082	0.000474506	0.135251	0.222	0.225	1	ENSMUST00000148721	2310061I04Rik	ENSMUSG00000050705	protein_coding	cds	chr17-35897191-35897262	chr17-35896646-35898082	0
chr3-52927284-52927867	0.000475164	-0.328919	0.06	0.179	1	ENSMUST00000194274	RP24-297E7.1	ENSMUSG00000104401	lincRNA	gap	chr3-52924695-52927622	chr3-52927284-52927867	0
chr5-67931500-67932113	0.000476202	-0.332981	0.028	0.096	1	ENSMUST00000177616	Gm21905	ENSMUSG00000095346	protein_coding	gap	chr5-67927299-67946372	chr5-67931500-67932113	0
chr9-35116024-35117997	0.000477207	-0.234908	0.21	0.391	1	ENSMUST00000034537	St3gal4	ENSMUSG00000032038	protein_coding	utr	chr9-35116698-35116810	chr9-35116024-35117997	0
chr1-191954983-191955677	0.000487109	-0.321475	0.053	0.164	1	ENSMUST00000180463	Rd3	ENSMUSG00000049353	protein_coding	exon	chr1-191977370-191977709	chr1-191954983-191955677	21692
chr13-113863790-113864051	0.000491201	-0.361389	0.013	0.071	1	ENSMUST00000091201	Arl15	ENSMUSG00000042348	protein_coding	gap	chr13-113794697-113922246	chr13-113863790-113864051	0
chr2-92982754-92983663	0.000501078	-0.363969	0.052	0.146	1	ENSMUST00000178666	Prdm11	ENSMUSG00000075028	protein_coding	gap	chr2-92980699-92993363	chr2-92982754-92983663	0
chr6-124863051-124864273	0.000503671	0.110879	0.067	0.043	1	ENSMUST00000046893	Gpr162	ENSMUSG00000038390	protein_coding	utr	chr6-124863671-124863917	chr6-124863051-124864273	0
chr10-117982359-117983727	0.000504155	-0.277266	0.053	0.169	1	ENSMUST00000064667	Rap1b	ENSMUSG00000052681	protein_coding	exon	chr10-117845831-117845935	chr10-117982359-117983727	136423
chr5-43554757-43555682	0.000504451	0.15929	0.05	0.02	1	ENSMUST00000167522	C1qtnf7	ENSMUSG00000061535	protein_coding	gap	chr5-43515987-43609052	chr5-43554757-43555682	0
chr8-126526891-126527579	0.000508354	-0.345305	0.093	0.22	1	ENSMUST00000170518	Gm17296	ENSMUSG00000090290	protein_coding	exon	chr8-126474255-126475065	chr8-126526891-126527579	51825
chr2-65021897-65023204	0.000512063	-0.281057	0.057	0.174	1	ENSMUST00000028252	Grb14	ENSMUSG00000026888	protein_coding	cds	chr2-65022460-65022644	chr2-65021897-65023204	0
chr2-84916524-84917420	0.000529152	-0.336086	0.055	0.149	1	ENSMUST00000130278	Slc43a3	ENSMUSG00000027074	protein_coding	exon	chr2-84936579-84936644	chr2-84916524-84917420	19158
chr14-70241407-70241764	0.000529215	-0.244647	0.008	0.053	1	ENSMUST00000078434	Ppp3cc	ENSMUSG00000022092	protein_coding	gap	chr14-70240982-70245852	chr14-70241407-70241764	0
chr17-5397133-5397816	0.000535238	0.124206	0.065	0.048	1	ENSMUST00000005053	Tmem242	ENSMUSG00000004945	protein_coding	utr	chr17-5410870-5411368	chr17-5397133-5397816	13053
chr5-123674911-123675837	0.000536427	-0.230401	0.02	0.091	1	ENSMUST00000111566	Clip1	ENSMUSG00000049550	protein_coding	gap	chr5-123656087-123684251	chr5-123674911-123675837	0
chr11-117626568-117626903	0.000543387	-0.387045	0.045	0.114	1	ENSMUST00000155384	2900041M22Rik	ENSMUSG00000054418	processed_transcript	exon	chr11-117612262-117613857	chr11-117626568-117626903	12710
chr3-108435618-108435963	0.000545143	-0.41494	0.033	0.124	1	ENSMUST00000153499	Sars	ENSMUSG00000068739	protein_coding	cds	chr3-108435886-108435966	chr3-108435618-108435963	0
chr4-94829833-94830356	0.00054689	-0.466466	0.045	0.144	1	ENSMUST00000102798	Tek	ENSMUSG00000006386	protein_coding	cds	chr4-94829884-94830018	chr4-94829833-94830356	0
chr4-53186144-53187830	0.000551774	0.179287	0.14	0.114	1	ENSMUST00000146501	4930412L05Rik	ENSMUSG00000087192	processed_transcript	exon	chr4-53205066-53205299	chr4-53186144-53187830	17235
chr4-114779862-114780523	0.000555637	-0.426947	0.042	0.134	1	ENSMUST00000137570	Gm12830	ENSMUSG00000055198	protein_coding	exon	chr4-114821722-114821915	chr4-114779862-114780523	41198
chr5-137599733-137601693	0.000558446	0.104512	0.437	0.444	1	ENSMUST00000154708	Mospd3	ENSMUSG00000037221	protein_coding	cds	chr5-137600271-137600475	chr5-137599733-137601693	0
chr9-48835046-48836697	0.000558499	-0.25863	0.175	0.328	1	ENSMUST00000093852	Zbtb16	ENSMUSG00000066687	protein_coding	utr	chr9-48835788-48835945	chr9-48835046-48836697	0
chr8-88537885-88538881	0.000560071	-0.399894	0.045	0.157	1	ENSMUST00000169179	Nkd1	ENSMUSG00000031661	protein_coding	gap	chr8-88527778-88574197	chr8-88537885-88538881	0
chr2-90579113-90581573	0.000560662	-0.216084	0.16	0.336	1	ENSMUST00000168621	Ptprj	ENSMUSG00000025314	protein_coding	cds	chr2-90580156-90580587	chr2-90579113-90581573	0
chr9-115617713-115618349	0.000568494	-0.244891	0.012	0.083	1	ENSMUST00000082810	n-R5s92	ENSMUSG00000094630	rRNA	exon	chr9-115626600-115626718	chr9-115617713-115618349	8250
chr16-45870597-45871836	0.000570645	-0.396068	0.07	0.199	1	ENSMUST00000136405	Phldb2	ENSMUSG00000033149	protein_coding	gap	chr16-45860437-45873801	chr16-45870597-45871836	0
chr13-110562001-110563213	0.000576444	-0.368229	0.13	0.293	1	ENSMUST00000022212	Plk2	ENSMUSG00000021701	protein_coding	utr	chr13-110400225-110400844	chr13-110562001-110563213	161156
chr12-105511139-105512434	0.000577134	-0.372107	0.045	0.144	1	ENSMUST00000178224	D430019H16Rik	ENSMUSG00000094910	protein_coding	utr	chr12-105487830-105493095	chr12-105511139-105512434	18043
chr1-74294857-74296189	0.000584374	-0.255054	0.267	0.437	1	ENSMUST00000141560	Tmbim1	ENSMUSG00000006301	protein_coding	cds	chr1-74295198-74295399	chr1-74294857-74296189	0
chr16-15886495-15888227	0.000589455	-0.232695	0.242	0.409	1	ENSMUST00000040248	Spidr	ENSMUSG00000041974	protein_coding	utr	chr16-15889227-15889629	chr16-15886495-15888227	999
chr10-123072032-123072297	0.000599608	-0.218278	0.008	0.051	1	ENSMUST00000170935	Mon2	ENSMUSG00000034602	protein_coding	gap	chr10-123059252-123075851	chr10-123072032-123072297	0
chr2-167823073-167823850	0.000599938	-0.311323	0.042	0.144	1	ENSMUST00000143649	1200007C13Rik	ENSMUSG00000087684	lincRNA	exon	chr2-167827693-167829431	chr2-167823073-167823850	3842
chr7-109567037-109567610	0.000602529	-0.250194	0.012	0.053	1	ENSMUST00000168005	St5	ENSMUSG00000031024	protein_coding	gap	chr7-109553112-109570006	chr7-109567037-109567610	0
chr7-15962118-15963455	0.000603775	0.200127	0.265	0.232	1	ENSMUST00000144956	Ehd2	ENSMUSG00000074364	protein_coding	cds	chr7-15963380-15963473	chr7-15962118-15963455	0
chr6-125529453-125529857	0.000604456	-0.355679	0.028	0.104	1	ENSMUST00000100941	Vwf	ENSMUSG00000001930	protein_coding	exon	chr6-125546774-125546819	chr6-125529453-125529857	16916
chr2-45171582-45172226	0.000606086	-0.426827	0.033	0.116	1	ENSMUST00000188811	Gm28643	ENSMUSG00000100135	lincRNA	exon	chr2-45168248-45168467	chr2-45171582-45172226	3114
chr11-116011902-116012996	0.000607449	0.151661	0.197	0.169	1	ENSMUST00000021114	Galk1	ENSMUSG00000020766	protein_coding	cds	chr11-116012514-116012678	chr11-116011902-116012996	0
chr10-70256771-70257517	0.000609952	-0.316557	0.015	0.088	1	ENSMUST00000046807	Slc16a9	ENSMUSG00000037762	protein_coding	gap	chr10-70256193-70267091	chr10-70256771-70257517	0
chr16-14180242-14180530	0.000613703	-0.363877	0.02	0.083	1	ENSMUST00000156041	Nde1	ENSMUSG00000022678	protein_coding	gap	chr16-14175440-14183475	chr16-14180242-14180530	0
chr7-80044058-80044659	0.000618878	-0.319463	0.045	0.136	1	ENSMUST00000166250	Zfp710	ENSMUSG00000048897	protein_coding	gap	chr7-80024987-80081048	chr7-80044058-80044659	0
chr17-31905272-31906307	0.000621947	-0.303493	0.158	0.328	1	ENSMUST00000002145	Hsf2bp	ENSMUSG00000002076	protein_coding	utr	chr17-31944769-31946602	chr17-31905272-31906307	38461
chr4-58911058-58912989	0.000627116	-0.23028	0.135	0.306	1	ENSMUST00000134848	AI314180	ENSMUSG00000050812	protein_coding	cds	chr4-58911869-58911902	chr4-58911058-58912989	0
chr12-79907612-79907907	0.000630055	-0.318292	0.017	0.088	1	ENSMUST00000021552	Zfp36l1	ENSMUSG00000021127	protein_coding	utr	chr12-80107760-80109588	chr12-79907612-79907907	199852
chr8-71680405-71680655	0.000639753	-0.393445	0.02	0.091	1	ENSMUST00000110013	Jak3	ENSMUSG00000031805	protein_coding	cds	chr8-71680640-71680797	chr8-71680405-71680655	0
chr4-153023663-153024033	0.000640473	0.267205	0.058	0.02	1	ENSMUST00000151703	Gm13173	ENSMUSG00000085648	lincRNA	exon	chr4-153145590-153145883	chr4-153023663-153024033	121556
chr5-112661137-112661462	0.000644169	0.281498	0.053	0.015	1	ENSMUST00000086617	Myo18b	ENSMUSG00000072720	protein_coding	utr	chr5-112688876-112689097	chr5-112661137-112661462	27413
chr1-184279239-184279516	0.000651	-0.344714	0.007	0.061	1	ENSMUST00000193894	RP23-172L16.3	ENSMUSG00000102682	lincRNA	exon	chr1-184358329-184358565	chr1-184279239-184279516	78812
chr17-28428509-28429150	0.00066313	-0.33135	0.037	0.134	1	ENSMUST00000177939	Fkbp5	ENSMUSG00000024222	protein_coding	gap	chr17-28428467-28429220	chr17-28428509-28429150	0
chr14-61172253-61173644	0.000667832	-0.209562	0.235	0.427	1	ENSMUST00000121091	Sacs	ENSMUSG00000048279	protein_coding	cds	chr14-61173298-61173448	chr14-61172253-61173644	0
chr6-97615970-97617829	0.000673921	-0.321994	0.067	0.169	1	ENSMUST00000113355	Frmd4b	ENSMUSG00000030064	protein_coding	utr	chr6-97617190-97617541	chr6-97615970-97617829	0
chr11-54112669-54113703	0.000675748	-0.270393	0.1	0.235	1	ENSMUST00000174616	P4ha2	ENSMUSG00000018906	protein_coding	gap	chr11-54111575-54114136	chr11-54112669-54113703	0
chr5-134675745-134676933	0.000680078	-0.253728	0.21	0.371	1	ENSMUST00000100641	Gm10369	ENSMUSG00000072573	protein_coding	cds	chr5-134676564-134676799	chr5-134675745-134676933	0
chr2-27087729-27089515	0.000686607	-0.305081	0.092	0.227	1	ENSMUST00000091233	Adamtsl2	ENSMUSG00000036040	protein_coding	gap	chr2-27087292-27089583	chr2-27087729-27089515	0
chr13-46752643-46753294	0.000690015	-0.313613	0.027	0.093	1	ENSMUST00000056978	Kif13a	ENSMUSG00000021375	protein_coding	cds	chr13-46752081-46752872	chr13-46752643-46753294	0
chr9-37080129-37080818	0.000696367	-0.390455	0.018	0.086	1	ENSMUST00000189294	Pknox2	ENSMUSG00000035934	protein_coding	gap	chr9-36987273-37083206	chr9-37080129-37080818	0
chr11-115809011-115809707	0.000698616	-0.374309	0.168	0.311	1	ENSMUST00000156812	Caskin2	ENSMUSG00000034471	protein_coding	gap	chr11-115807891-115811886	chr11-115809011-115809707	0
chr10-62529960-62530806	0.000703007	-0.36653	0.08	0.205	1	ENSMUST00000160987	Srgn	ENSMUSG00000020077	protein_coding	exon	chr10-62527339-62527451	chr10-62529960-62530806	2508
chr9-14641391-14642878	0.000705121	-0.367598	0.087	0.21	1	ENSMUST00000162901	Amotl1	ENSMUSG00000013076	protein_coding	exon	chr9-14615201-14615483	chr9-14641391-14642878	25907
chr10-25290974-25291471	0.000712659	-0.359291	0.078	0.194	1	ENSMUST00000177124	Akap7	ENSMUSG00000039166	protein_coding	gap	chr10-25289731-25296927	chr10-25290974-25291471	0
chr2-163007072-163007627	0.000722883	-0.35627	0.02	0.076	1	ENSMUST00000117123	Sgk2	ENSMUSG00000017868	protein_coding	gap	chr2-163006884-163012909	chr2-163007072-163007627	0
chr6-38180694-38180998	0.000740605	-0.328783	0.018	0.078	1	ENSMUST00000169256	D630045J12Rik	ENSMUSG00000063455	protein_coding	gap	chr6-38178891-38181313	chr6-38180694-38180998	0
chr9-44537333-44538394	0.000741857	0.217091	0.217	0.174	1	ENSMUST00000179828	Cxcr5	ENSMUSG00000047880	protein_coding	gap	chr9-44526441-44556200	chr9-44537333-44538394	0
chr1-163779046-163780173	0.000744336	-0.21296	0.257	0.414	1	ENSMUST00000077642	Kifap3	ENSMUSG00000026585	protein_coding	cds	chr1-163779871-163779902	chr1-163779046-163780173	0
chr19-6488835-6489452	0.000756335	0.129999	0.067	0.045	1	ENSMUST00000137166	Nrxn2	ENSMUSG00000033768	protein_coding	gap	chr19-6488811-6490066	chr19-6488835-6489452	0
chr6-71710439-71710643	0.000760174	-0.316012	0.007	0.051	1	ENSMUST00000121469	Reep1	ENSMUSG00000052852	protein_coding	gap	chr6-71708002-71756363	chr6-71710439-71710643	0
chr18-35815443-35816439	0.000769073	0.113117	0.097	0.088	1	ENSMUST00000170693	Ube2d2a	ENSMUSG00000091896	protein_coding	utr	chr18-35805564-35807172	chr18-35815443-35816439	8270
chr8-64880397-64881455	0.000774849	-0.261016	0.037	0.119	1	ENSMUST00000034017	Klhl2	ENSMUSG00000031605	protein_coding	exon	chr8-64849633-64849818	chr8-64880397-64881455	30578
chr5-118709713-118710243	0.000784595	-0.297259	0.023	0.101	1	ENSMUST00000100816	Med13l	ENSMUSG00000018076	protein_coding	gap	chr5-118680972-118718482	chr5-118709713-118710243	0
chr5-142424406-142425427	0.000785248	-0.294375	0.135	0.288	1	ENSMUST00000072837	Foxk1	ENSMUSG00000056493	protein_coding	gap	chr5-142402042-142435140	chr5-142424406-142425427	0
chr9-60864608-60865019	0.00078869	-0.456665	0.043	0.154	1	ENSMUST00000050183	Uaca	ENSMUSG00000034485	protein_coding	gap	chr9-60863699-60866364	chr9-60864608-60865019	0
chr7-74519403-74519679	0.00078924	-0.30522	0.007	0.053	1	ENSMUST00000138099	Slco3a1	ENSMUSG00000025790	protein_coding	gap	chr7-74504643-74552111	chr7-74519403-74519679	0
chr11-102284012-102285563	0.000793585	0.107843	0.412	0.422	1	ENSMUST00000100387	Tmub2	ENSMUSG00000034757	protein_coding	cds	chr11-102284939-102285088	chr11-102284012-102285563	0
chr5-142823036-142823779	0.000795667	0.166433	0.155	0.126	1	ENSMUST00000151477	Tnrc18	ENSMUSG00000039477	protein_coding	exon	chr5-142817272-142817662	chr5-142823036-142823779	5373
chr9-50752062-50753333	0.000811382	-0.18383	0.018	0.071	1	ENSMUST00000042790	Hspb2	ENSMUSG00000038086	protein_coding	cds	chr9-50752177-50752270	chr9-50752062-50753333	0
chr11-68871422-68872314	0.000828555	-0.24428	0.053	0.174	1	ENSMUST00000101017	Ndel1	ENSMUSG00000018736	protein_coding	utr	chr11-68871781-68871858	chr11-68871422-68872314	0
chr3-151437235-151438062	0.000829439	-0.4065	0.035	0.141	1	ENSMUST00000046977	Eltd1	ENSMUSG00000039167	protein_coding	cds	chr3-151437983-151438004	chr3-151437235-151438062	0
chr15-34967281-34967684	0.000833727	0.206074	0.062	0.03	1	ENSMUST00000128425	Stk3	ENSMUSG00000022329	protein_coding	gap	chr15-34959077-34999830	chr15-34967281-34967684	0
chr7-101107747-101109834	0.000834676	-0.17426	0.427	0.566	1	ENSMUST00000098250	Fchsd2	ENSMUSG00000030691	protein_coding	cds	chr7-101109019-101109039	chr7-101107747-101109834	0
chr11-119214993-119216427	0.000835497	0.233049	0.168	0.136	1	ENSMUST00000125856	Tbc1d16	ENSMUSG00000039976	protein_coding	gap	chr11-119210741-119221843	chr11-119214993-119216427	0
chrX-151519972-151521533	0.000844563	-0.20552	0.217	0.394	1	ENSMUST00000168501	Phf8	ENSMUSG00000041229	protein_coding	utr	chrX-151520672-151521437	chrX-151519972-151521533	0
chr6-32459980-32461005	0.000849579	-0.421863	0.088	0.227	1	ENSMUST00000115096	Plxna4	ENSMUSG00000029765	protein_coding	gap	chr6-32310593-32496712	chr6-32459980-32461005	0
chr1-38604495-38604893	0.000849635	-0.404544	0.022	0.096	1	ENSMUST00000134963	Aff3	ENSMUSG00000037138	protein_coding	gap	chr1-38536947-38664857	chr1-38604495-38604893	0
chr1-131002743-131003707	0.000857852	0.196667	0.065	0.035	1	ENSMUST00000016673	Il10	ENSMUSG00000016529	protein_coding	exon	chr1-131019845-131020076	chr1-131002743-131003707	16137
chr3-116952246-116952673	0.000863284	-0.414791	0.03	0.119	1	ENSMUST00000143611	Palmd	ENSMUSG00000033377	protein_coding	gap	chr3-116948036-116953056	chr3-116952246-116952673	0
chr13-110683092-110683923	0.000869947	-0.433823	0.08	0.182	1	ENSMUST00000022212	Plk2	ENSMUSG00000021701	protein_coding	utr	chr13-110400225-110400844	chr13-110683092-110683923	282247
chr16-87393690-87394539	0.00087097	0.136651	0.052	0.028	1	ENSMUST00000039449	Ltn1	ENSMUSG00000052299	protein_coding	cds	chr16-87394522-87394708	chr16-87393690-87394539	0
chr11-69751797-69751996	0.000872119	0.155522	0.057	0.02	1	ENSMUST00000071213	Polr2a	ENSMUSG00000005198	protein_coding	gap	chr11-69748114-69758130	chr11-69751797-69751996	0
chr13-60682809-60683909	0.00087501	-0.23989	0.03	0.098	1	ENSMUST00000077453	Dapk1	ENSMUSG00000021559	protein_coding	gap	chr13-60602597-60696230	chr13-60682809-60683909	0
chr2-153428501-153428850	0.000876977	-0.380783	0.035	0.111	1	ENSMUST00000132770	Nol4l	ENSMUSG00000061411	protein_coding	gap	chr2-153420810-153436205	chr2-153428501-153428850	0
chr13-37446658-37447106	0.000877896	-0.424841	0.095	0.217	1	ENSMUST00000191359	Gm29459	ENSMUSG00000100932	lincRNA	exon	chr13-37449400-37449721	chr13-37446658-37447106	2293
chr4-101120928-101121272	0.000884314	-0.376879	0.017	0.076	1	ENSMUST00000106955	Raver2	ENSMUSG00000035275	protein_coding	gap	chr4-101120580-101131263	chr4-101120928-101121272	0
chr9-62522914-62523443	0.000900935	-0.436567	0.045	0.149	1	ENSMUST00000123379	Coro2b	ENSMUSG00000041729	protein_coding	gap	chr9-62489442-62536652	chr9-62522914-62523443	0
chr11-76130714-76131609	0.000903787	-0.362416	0.067	0.177	1	ENSMUST00000170143	Vps53	ENSMUSG00000017288	protein_coding	gap	chr11-76121597-76134408	chr11-76130714-76131609	0
chr15-73493934-73494544	0.000904659	-0.306927	0.03	0.109	1	ENSMUST00000043414	Dennd3	ENSMUSG00000036661	protein_coding	exon	chr15-73512560-73512847	chr15-73493934-73494544	18015
chr11-88172646-88174071	0.000905611	-0.269742	0.023	0.104	1	ENSMUST00000154812	Cuedc1	ENSMUSG00000018378	protein_coding	gap	chr11-88170175-88177269	chr11-88172646-88174071	0
chr18-60651572-60652459	0.000911421	-0.343566	0.118	0.242	1	ENSMUST00000137894	Synpo	ENSMUSG00000043079	protein_coding	gap	chr18-60630086-60652922	chr18-60651572-60652459	0
chr11-109560514-109561286	0.000922233	-0.267055	0.04	0.141	1	ENSMUST00000106697	Arsg	ENSMUSG00000020604	protein_coding	gap	chr11-109558072-109563181	chr11-109560514-109561286	0
chr14-30650776-30651369	0.000924351	0.112847	0.05	0.043	1	ENSMUST00000064230	Rft1	ENSMUSG00000052395	protein_coding	exon	chr14-30654360-30654475	chr14-30650776-30651369	2990
chr13-28950416-28950888	0.00094044	0.126143	0.057	0.038	1	ENSMUST00000067230	Sox4	ENSMUSG00000076431	protein_coding	utr	chr13-28948919-28951698	chr13-28950416-28950888	0
chr7-100990807-100991269	0.000951212	-0.274687	0.033	0.104	1	ENSMUST00000037540	P2ry2	ENSMUSG00000032860	protein_coding	utr	chr7-100996572-100997974	chr7-100990807-100991269	5302
chr8-22680947-22681474	0.000952267	-0.30554	0.013	0.068	1	ENSMUST00000150259	Ikbkb	ENSMUSG00000031537	protein_coding	gap	chr8-22678915-22681662	chr8-22680947-22681474	0
chr3-95904596-95905520	0.000953261	-0.289165	0.05	0.154	1	ENSMUST00000147962	Car14	ENSMUSG00000038526	protein_coding	utr	chr3-95904320-95904685	chr3-95904596-95905520	0
chrX-74022796-74024243	0.000955859	-0.226561	0.092	0.235	1	ENSMUST00000132144	Irak1	ENSMUSG00000031392	protein_coding	cds	chrX-74023066-74023091	chrX-74022796-74024243	0
chr5-137087262-137087823	0.000957156	-0.43515	0.07	0.194	1	ENSMUST00000041388	Serpine1	ENSMUSG00000037411	protein_coding	exon	chr5-137072129-137072272	chr5-137087262-137087823	14989
chr2-119313797-119314542	0.000957895	-0.409223	0.072	0.184	1	ENSMUST00000156538	Gm14207	ENSMUSG00000074912	processed_transcript	exon	chr2-119321187-119321666	chr2-119313797-119314542	6644
chr12-110702775-110703575	0.000959768	0.112011	0.123	0.126	1	ENSMUST00000155242	Hsp90aa1	ENSMUSG00000021270	protein_coding	exon	chr12-110702623-110702728	chr12-110702775-110703575	46
chr2-34670971-34672079	0.000960733	-0.206719	0.028	0.101	1	ENSMUST00000113111	Gapvd1	ENSMUSG00000026867	protein_coding	utr	chr2-34676184-34678036	chr2-34670971-34672079	4104
chr6-54971689-54973184	0.00097037	-0.249959	0.157	0.313	1	ENSMUST00000060655	Nod1	ENSMUSG00000038058	protein_coding	utr	chr6-54972269-54972612	chr6-54971689-54973184	0
chr2-180114067-180114379	0.000970444	-0.320056	0.057	0.139	1	ENSMUST00000040668	Osbpl2	ENSMUSG00000039050	protein_coding	exon	chr2-180119306-180119469	chr2-180114067-180114379	4926
chr10-19140615-19140987	0.000985066	-0.407588	0.04	0.124	1	ENSMUST00000122863	Tnfaip3	ENSMUSG00000019850	protein_coding	exon	chr10-19015548-19015657	chr10-19140615-19140987	124957
chr13-41662165-41663162	0.000985133	-0.335726	0.14	0.275	1	ENSMUST00000067176	Gm5082	ENSMUSG00000054258	protein_coding	utr	chr13-41656429-41656524	chr13-41662165-41663162	5640
chr16-38625986-38626301	0.000993603	-0.382097	0.023	0.101	1	ENSMUST00000124866	Arhgap31	ENSMUSG00000022799	protein_coding	gap	chr16-38625634-38636896	chr16-38625986-38626301	0
chr4-95474574-95475133	0.000993732	-0.311012	0.025	0.093	1	ENSMUST00000142458	Gm830	ENSMUSG00000084939	processed_transcript	gap	chr4-95469247-95487261	chr4-95474574-95475133	0
chr10-94479441-94480078	0.00099654	-0.41097	0.065	0.174	1	ENSMUST00000132743	Tmcc3	ENSMUSG00000020023	protein_coding	gap	chr10-94430640-94578422	chr10-94479441-94480078	0
chr1-165684446-165685015	0.000999955	-0.401925	0.133	0.275	1	ENSMUST00000193714	Rcsd1	ENSMUSG00000040723	protein_coding	gap	chr1-165665051-165707890	chr1-165684446-165685015	0
chr6-83120859-83122255	0.00101185	0.105257	0.368	0.371	1	ENSMUST00000146328	Wbp1	ENSMUSG00000030035	protein_coding	cds	chr6-83121203-83121271	chr6-83120859-83122255	0
chr8-9975881-9976653	0.00101901	-0.193957	0.252	0.417	1	ENSMUST00000095476	Lig4	ENSMUSG00000049717	protein_coding	utr	chr8-9976031-9976323	chr8-9975881-9976653	0
chr10-121276770-121277354	0.00101987	-0.245556	0.01	0.056	1	ENSMUST00000064107	Tbc1d30	ENSMUSG00000052302	protein_coding	gap	chr10-121275868-121279097	chr10-121276770-121277354	0
chr2-38533217-38533658	0.00102339	-0.335611	0.095	0.205	1	ENSMUST00000156726	Nek6	ENSMUSG00000026749	protein_coding	gap	chr2-38514659-38550552	chr2-38533217-38533658	0
chr2-167112307-167113084	0.00102435	0.121911	0.055	0.04	1	ENSMUST00000059826	Kcnb1	ENSMUSG00000050556	protein_coding	gap	chr2-167106360-167188056	chr2-167112307-167113084	0
chr5-65094978-65095557	0.00102766	-0.439451	0.063	0.172	1	ENSMUST00000184941	Tmem156	ENSMUSG00000037913	protein_coding	exon	chr5-65090715-65091625	chr5-65094978-65095557	3352
chr5-21144434-21145009	0.00103517	0.216071	0.168	0.121	1	ENSMUST00000036031	Gsap	ENSMUSG00000039934	protein_coding	exon	chr5-21186267-21186459	chr5-21144434-21145009	41257
chr11-118162188-118162613	0.00104122	-0.178588	0.005	0.078	1	ENSMUST00000100181	Cyth1	ENSMUSG00000017132	protein_coding	gap	chr11-118133375-118169015	chr11-118162188-118162613	0
chr17-67512526-67513273	0.00105257	-0.417586	0.108	0.232	1	ENSMUST00000097290	Lrrc30	ENSMUSG00000073375	protein_coding	utr	chr17-67630965-67631680	chr17-67512526-67513273	117691
chr4-155839301-155839940	0.00106043	-0.281547	0.1	0.227	1	ENSMUST00000141883	Mxra8	ENSMUSG00000029070	protein_coding	cds	chr4-155839842-155839890	chr4-155839301-155839940	0
chr7-67638923-67639339	0.00107038	0.23289	0.052	0.02	1	ENSMUST00000191035	Lrrc28	ENSMUSG00000030556	protein_coding	gap	chr7-67628336-67641103	chr7-67638923-67639339	0
chr5-105435393-105435760	0.00108431	-0.346602	0.022	0.091	1	ENSMUST00000112707	Lrrc8b	ENSMUSG00000070639	protein_coding	gap	chr5-105415913-105468796	chr5-105435393-105435760	0
chr1-74396888-74398476	0.00108554	-0.176649	0.328	0.497	1	ENSMUST00000027367	Ctdsp1	ENSMUSG00000026176	protein_coding	utr	chr1-74395585-74397285	chr1-74396888-74398476	0
chr7-132713322-132714014	0.0010875	0.10273	0.055	0.04	1	ENSMUST00000106169	Fam53b	ENSMUSG00000030956	protein_coding	utr	chr7-132712806-132715642	chr7-132713322-132714014	0
chr8-12905120-12906064	0.00109843	-0.4543	0.065	0.177	1	ENSMUST00000095456	Mcf2l	ENSMUSG00000031442	protein_coding	gap	chr8-12880151-12963163	chr8-12905120-12906064	0
chr1-178600835-178601413	0.00110974	0.27699	0.127	0.076	1	ENSMUST00000193931	Kif26b	ENSMUSG00000026494	protein_coding	gap	chr1-178530791-178678825	chr1-178600835-178601413	0
chr5-31267622-31268483	0.0011098	0.230575	0.087	0.051	1	ENSMUST00000041565	Ift172	ENSMUSG00000038564	protein_coding	cds	chr5-31267595-31267679	chr5-31267622-31268483	0
chr10-37095717-37096223	0.00111725	-0.286887	0.015	0.063	1	ENSMUST00000092584	Marcks	ENSMUSG00000069662	protein_coding	utr	chr10-37133375-37136107	chr10-37095717-37096223	37151
chr9-106475850-106477617	0.00113077	0.112604	0.52	0.503	1	ENSMUST00000156426	Parp3	ENSMUSG00000023249	protein_coding	cds	chr9-106475799-106475975	chr9-106475850-106477617	0
chr10-80405859-80407387	0.00113233	0.128787	0.192	0.177	1	ENSMUST00000020372	Uqcr11	ENSMUSG00000020163	protein_coding	cds	chr10-80406696-80406745	chr10-80405859-80407387	0
chr5-75596173-75596785	0.00113257	-0.413718	0.04	0.129	1	ENSMUST00000144270	Kit	ENSMUSG00000005672	protein_coding	gap	chr5-75575119-75607025	chr5-75596173-75596785	0
chr5-92745501-92746296	0.00113312	-0.367916	0.075	0.182	1	ENSMUST00000168878	Shroom3	ENSMUSG00000029381	protein_coding	gap	chr5-92683832-92780752	chr5-92745501-92746296	0
chr7-45455966-45457848	0.00113554	0.152048	0.28	0.225	1	ENSMUST00000003964	Gys1	ENSMUSG00000003865	protein_coding	utr	chr7-45455368-45456619	chr7-45455966-45457848	0
chr15-78624201-78625114	0.00113975	0.169	0.307	0.27	1	ENSMUST00000043069	Cyth4	ENSMUSG00000018008	protein_coding	utr	chr15-78620565-78622019	chr15-78624201-78625114	2181
chr4-56082381-56082816	0.00114013	-0.400262	0.023	0.091	1	ENSMUST00000134099	Gm12519	ENSMUSG00000085643	lincRNA	exon	chr4-55993614-55993739	chr4-56082381-56082816	88641
chr1-119836106-119837980	0.0011409	-0.204384	0.23	0.404	1	ENSMUST00000168303	Ptpn4	ENSMUSG00000026384	protein_coding	utr	chr1-119836902-119837071	chr1-119836106-119837980	0
chr16-33580473-33581244	0.00114592	-0.247863	0.042	0.134	1	ENSMUST00000122427	Slc12a8	ENSMUSG00000035506	protein_coding	gap	chr16-33551115-33590251	chr16-33580473-33581244	0
chr2-137757227-137757597	0.0011478	-0.316143	0.015	0.073	1	ENSMUST00000134833	Gm14064	ENSMUSG00000085640	lincRNA	gap	chr2-137692978-137828986	chr2-137757227-137757597	0
chr12-85477821-85478083	0.00114845	0.176285	0.102	0.056	1	ENSMUST00000021674	Fos	ENSMUSG00000021250	protein_coding	utr	chr12-85476459-85477273	chr12-85477821-85478083	547
chr11-117275818-117276340	0.00115709	-0.334709	0.087	0.179	1	ENSMUST00000106354	Sept9	ENSMUSG00000059248	protein_coding	gap	chr11-117232720-117290397	chr11-117275818-117276340	0
chr1-11033109-11033867	0.00116103	-0.353874	0.077	0.184	1	ENSMUST00000027056	Prex2	ENSMUSG00000048960	protein_coding	gap	chr1-10993910-11061325	chr1-11033109-11033867	0
chr18-73753861-73754650	0.00116407	-0.236929	0.122	0.293	1	ENSMUST00000041138	Elac1	ENSMUSG00000036941	protein_coding	utr	chr18-73754402-73754479	chr18-73753861-73754650	0
chr10-86164084-86164404	0.00116612	-0.340152	0.042	0.111	1	ENSMUST00000145864	Syn3	ENSMUSG00000059602	protein_coding	gap	chr10-86135049-86351550	chr10-86164084-86164404	0
chr12-82489592-82489913	0.00116669	-0.36099	0.03	0.096	1	ENSMUST00000179295	Gm5435	ENSMUSG00000094374	protein_coding	cds	chr12-82495419-82496537	chr12-82489592-82489913	5505
chr11-117098108-117098494	0.00117231	-0.284927	0.018	0.076	1	ENSMUST00000127090	Sec14l1	ENSMUSG00000020823	protein_coding	exon	chr11-117115168-117115351	chr11-117098108-117098494	16673
chr9-67565650-67566459	0.00117872	0.195388	0.078	0.038	1	ENSMUST00000040025	Tln2	ENSMUSG00000052698	protein_coding	exon	chr9-67559614-67559703	chr9-67565650-67566459	5946
chr7-64155301-64156898	0.00117895	-0.265527	0.133	0.265	1	ENSMUST00000153421	Trpm1	ENSMUSG00000030523	protein_coding	gap	chr7-64154107-64197276	chr7-64155301-64156898	0
chr16-35110024-35111375	0.00118326	0.10921	0.055	0.045	1	ENSMUST00000061156	Ptplb	ENSMUSG00000035376	protein_coding	utr	chr16-35106398-35109175	chr16-35110024-35111375	848
chr2-28446292-28447488	0.00120125	-0.252132	0.025	0.101	1	ENSMUST00000150362	Ppp1r26	ENSMUSG00000035829	protein_coding	gap	chr2-28446897-28447884	chr2-28446292-28447488	0
chr11-88673747-88674517	0.00120196	-0.323556	0.018	0.083	1	ENSMUST00000144699	Msi2	ENSMUSG00000069769	protein_coding	gap	chr11-88590148-88712437	chr11-88673747-88674517	0
chr9-102354173-102355072	0.00120713	0.171497	0.138	0.104	1	ENSMUST00000149800	Ephb1	ENSMUSG00000032537	protein_coding	cds	chr9-102354282-102354339	chr9-102354173-102355072	0
chr4-130172065-130172609	0.00121818	-0.381575	0.062	0.162	1	ENSMUST00000175992	Tinagl1	ENSMUSG00000028776	protein_coding	gap	chr4-130169134-130172931	chr4-130172065-130172609	0
chr5-40044720-40045531	0.0012224	-0.378944	0.018	0.088	1	ENSMUST00000117944	Hs3st1	ENSMUSG00000051022	protein_coding	exon	chr5-39755310-39755475	chr5-40044720-40045531	289244
chr16-85803830-85804568	0.00123422	-0.302308	0.098	0.235	1	ENSMUST00000023610	Adamts1	ENSMUSG00000022893	protein_coding	exon	chr16-85801978-85803113	chr16-85803830-85804568	716
chr11-67896717-67897587	0.00123667	0.142948	0.08	0.045	1	ENSMUST00000108677	Usp43	ENSMUSG00000020905	protein_coding	cds	chr11-67897221-67897356	chr11-67896717-67897587	0
chr2-51981532-51982900	0.001242	-0.254777	0.047	0.139	1	ENSMUST00000145656	Nmi	ENSMUSG00000026946	protein_coding	exon	chr2-51972974-51973494	chr2-51981532-51982900	8037
chr5-147757887-147759241	0.00124477	-0.228356	0.033	0.116	1	ENSMUST00000031653	Flt1	ENSMUSG00000029648	protein_coding	exon	chr5-147725671-147726011	chr5-147757887-147759241	31875
chr18-82792597-82793215	0.00124888	-0.396658	0.072	0.179	1	ENSMUST00000188435	2210420H20Rik	ENSMUSG00000101773	lincRNA	exon	chr18-82758814-82759041	chr18-82792597-82793215	33555
chr6-145967969-145969130	0.00125181	-0.315743	0.053	0.146	1	ENSMUST00000111702	Sspn	ENSMUSG00000030255	protein_coding	utr	chr6-145961496-145965223	chr6-145967969-145969130	2745
chr19-38566148-38566918	0.00125184	0.292807	0.168	0.109	1	ENSMUST00000182481	Plce1	ENSMUSG00000024998	protein_coding	gap	chr19-38525453-38620442	chr19-38566148-38566918	0
chr4-134291939-134292390	0.00125394	0.123944	0.06	0.04	1	ENSMUST00000061234	Pdik1l	ENSMUSG00000050890	protein_coding	exon	chr4-134287627-134287895	chr4-134291939-134292390	4043
chr6-39059398-39059951	0.00126217	-0.387995	0.043	0.139	1	ENSMUST00000161781	Tbxas1	ENSMUSG00000029925	protein_coding	gap	chr6-39027955-39071355	chr6-39059398-39059951	0
chr7-132339570-132339790	0.00126791	-0.379136	0.043	0.119	1	ENSMUST00000124096	Fgfr2	ENSMUSG00000030849	protein_coding	gap	chr7-130172940-133081756	chr7-132339570-132339790	0
chr14-34362894-34364214	0.00127334	-0.259295	0.133	0.275	1	ENSMUST00000023826	Sncg	ENSMUSG00000023064	protein_coding	utr	chr14-34370274-34370544	chr14-34362894-34364214	6059
chr14-25207853-25209097	0.00127652	-0.233922	0.037	0.101	1	ENSMUST00000181582	Gm26660	ENSMUSG00000097601	lincRNA	exon	chr14-25355801-25358141	chr14-25207853-25209097	146703
chr10-18036616-18037305	0.00127685	-0.277968	0.007	0.056	1	ENSMUST00000020002	Abracl	ENSMUSG00000078453	protein_coding	exon	chr10-18023067-18023252	chr10-18036616-18037305	13363
chr5-81279304-81279728	0.00127819	-0.285434	0.008	0.053	1	ENSMUST00000153264	Lphn3	ENSMUSG00000037605	protein_coding	gap	chr5-81197632-81309870	chr5-81279304-81279728	0
chr3-122474877-122475167	0.00128596	-0.304306	0.018	0.076	1	ENSMUST00000029766	Bcar3	ENSMUSG00000028121	protein_coding	gap	chr3-122455093-122504926	chr3-122474877-122475167	0
chrX-75155478-75156195	0.00129213	-0.204033	0.018	0.078	1	ENSMUST00000165080	Smim9	ENSMUSG00000073094	protein_coding	gap	chrX-75149917-75161430	chrX-75155478-75156195	0
chr8-84203304-84204439	0.00129585	-0.187917	0.388	0.54	1	ENSMUST00000180630	Gm26532	ENSMUSG00000097296	lincRNA	exon	chr8-84208920-84209609	chr8-84203304-84204439	4480
chr5-24451342-24452622	0.00132539	-0.215283	0.222	0.391	1	ENSMUST00000024123	Agap3	ENSMUSG00000023353	protein_coding	cds	chr5-24452207-24452534	chr5-24451342-24452622	0
chr17-46104162-46105097	0.00132781	-0.359117	0.122	0.27	1	ENSMUST00000024763	Mrps18a	ENSMUSG00000023967	protein_coding	exon	chr17-46110986-46111129	chr17-46104162-46105097	5888
chr10-4026618-4027854	0.00134049	-0.314827	0.027	0.114	1	ENSMUST00000120585	Mthfd1l	ENSMUSG00000040675	protein_coding	gap	chr10-4018600-4028394	chr10-4026618-4027854	0
chr10-86138864-86139445	0.00134059	-0.41181	0.075	0.189	1	ENSMUST00000145864	Syn3	ENSMUSG00000059602	protein_coding	gap	chr10-86135049-86351550	chr10-86138864-86139445	0
chrX-99149142-99150367	0.00134654	-0.247003	0.022	0.083	1	ENSMUST00000052839	Efnb1	ENSMUSG00000031217	protein_coding	utr	chrX-99147528-99148991	chrX-99149142-99150367	150
chr5-120563496-120563907	0.00135263	0.221649	0.11	0.076	1	ENSMUST00000046426	Tpcn1	ENSMUSG00000032741	protein_coding	gap	chr5-120560344-120585184	chr5-120563496-120563907	0
chr5-39437503-39438312	0.00137837	-0.393515	0.092	0.197	1	ENSMUST00000117944	Hs3st1	ENSMUSG00000051022	protein_coding	utr	chr5-39613935-39614362	chr5-39437503-39438312	175622
chr15-10869858-10870183	0.00138297	-0.348883	0.027	0.116	1	ENSMUST00000180604	4930556M19Rik	ENSMUSG00000097058	lincRNA	exon	chr15-10788615-10790123	chr15-10869858-10870183	79734
chr5-150195260-150196527	0.00139821	0.186227	0.187	0.177	1	ENSMUST00000087204	Fry	ENSMUSG00000056602	protein_coding	exon	chr5-150259930-150260338	chr5-150195260-150196527	63402
chr12-44201901-44203195	0.0014062	0.134117	0.072	0.028	1	ENSMUST00000015049	Dnajb9	ENSMUSG00000014905	protein_coding	utr	chr12-44205897-44206953	chr12-44201901-44203195	2701
chr15-10742433-10742739	0.00141431	-0.373874	0.04	0.111	1	ENSMUST00000180604	4930556M19Rik	ENSMUSG00000097058	lincRNA	gap	chr15-10716775-10767434	chr15-10742433-10742739	0
chr17-86283485-86284336	0.00141909	-0.326202	0.053	0.146	1	ENSMUST00000097275	Prkce	ENSMUSG00000045038	protein_coding	gap	chr17-86168941-86353554	chr17-86283485-86284336	0
chr14-27174710-27175090	0.00141989	-0.392201	0.025	0.111	1	ENSMUST00000049206	Arhgef3	ENSMUSG00000021895	protein_coding	exon	chr14-27238039-27238153	chr14-27174710-27175090	62948
chr18-65071132-65071884	0.00142238	-0.245381	0.018	0.068	1	ENSMUST00000163516	Nedd4l	ENSMUSG00000024589	protein_coding	gap	chr18-64997422-65074723	chr18-65071132-65071884	0
chr14-27822994-27823368	0.00142433	0.19043	0.055	0.02	1	ENSMUST00000090302	Erc2	ENSMUSG00000040640	protein_coding	gap	chr14-27777243-27876586	chr14-27822994-27823368	0
chr3-87982316-87983184	0.00142751	-0.329624	0.118	0.25	1	ENSMUST00000160694	Nes	ENSMUSG00000004891	protein_coding	utr	chr3-87980031-87980451	chr3-87982316-87983184	1864
chr19-28594125-28594566	0.00142833	-0.290572	0.005	0.051	1	ENSMUST00000162022	Glis3	ENSMUSG00000052942	protein_coding	gap	chr19-28540409-28665752	chr19-28594125-28594566	0
chr12-116069872-116071376	0.0014305	0.187614	0.058	0.025	1	ENSMUST00000176078	Vipr2	ENSMUSG00000011171	protein_coding	exon	chr12-116077726-116077893	chr12-116069872-116071376	6349
chr1-24099586-24100823	0.00143201	-0.224648	0.217	0.384	1	ENSMUST00000187752	Fam135a	ENSMUSG00000026153	protein_coding	utr	chr1-24100061-24100194	chr1-24099586-24100823	0
chr10-95232484-95232883	0.00143648	-0.322458	0.047	0.141	1	ENSMUST00000053594	Cradd	ENSMUSG00000045867	protein_coding	gap	chr10-95175979-95322585	chr10-95232484-95232883	0
chr17-24643852-24645647	0.00144351	-0.30342	0.202	0.338	1	ENSMUST00000019684	Slc9a3r2	ENSMUSG00000002504	protein_coding	cds	chr17-24644819-24644899	chr17-24643852-24645647	0
chr10-53412034-53412458	0.00144445	-0.273745	0.012	0.068	1	ENSMUST00000095691	Cep85l	ENSMUSG00000038594	protein_coding	exon	chr10-53379509-53379851	chr10-53412034-53412458	32182
chr17-86731630-86732945	0.0014534	-0.271414	0.153	0.295	1	ENSMUST00000024954	Epas1	ENSMUSG00000024140	protein_coding	exon	chr17-86753907-86754308	chr17-86731630-86732945	20961
chr9-78491248-78491509	0.0014593	-0.289157	0.007	0.056	1	ENSMUST00000154207	Eef1a1	ENSMUSG00000037742	protein_coding	exon	chr9-78489074-78489151	chr9-78491248-78491509	2096
chr15-7088623-7089423	0.00146163	-0.3124	0.053	0.172	1	ENSMUST00000067190	Lifr	ENSMUSG00000054263	protein_coding	exon	chr15-7129559-7129826	chr15-7088623-7089423	40135
chr4-102045341-102046212	0.00146334	-0.43012	0.058	0.164	1	ENSMUST00000106911	Pde4b	ENSMUSG00000028525	protein_coding	exon	chr4-102087543-102087788	chr4-102045341-102046212	41330
chr17-9949007-9949545	0.00147635	-0.346713	0.018	0.073	1	ENSMUST00000097414	Qk	ENSMUSG00000062078	protein_coding	utr	chr17-10206471-10209614	chr17-9949007-9949545	256925
chr19-4023243-4023442	0.00148244	-0.306068	0.007	0.051	1	ENSMUST00000042497	Ndufv1	ENSMUSG00000037916	protein_coding	exon	chr19-4012551-4012806	chr19-4023243-4023442	10436
chr17-84044246-84044993	0.00148362	0.22165	0.153	0.116	1	ENSMUST00000157568	Gm23905	ENSMUSG00000088193	rRNA	exon	chr17-83947588-83947696	chr17-84044246-84044993	96549
chr7-19011542-19012673	0.00148659	0.135099	0.098	0.076	1	ENSMUST00000153321	Foxa3	ENSMUSG00000040891	protein_coding	exon	chr7-19013282-19014797	chr7-19011542-19012673	608
chr4-55672198-55672712	0.00149633	-0.423099	0.047	0.136	1	ENSMUST00000123620	Gm12506	ENSMUSG00000085375	lincRNA	exon	chr4-55636844-55636901	chr4-55672198-55672712	35296
chr11-102008926-102009415	0.00149816	-0.357234	0.023	0.091	1	ENSMUST00000132094	Mpp3	ENSMUSG00000052373	protein_coding	gap	chr11-102008685-102009642	chr11-102008926-102009415	0
chr1-54665696-54666298	0.00149889	0.112397	0.057	0.045	1	ENSMUST00000179030	Ankrd44	ENSMUSG00000052331	protein_coding	gap	chr1-54663987-54667371	chr1-54665696-54666298	0
chr17-10040507-10041408	0.00153834	-0.352373	0.073	0.187	1	ENSMUST00000097414	Qk	ENSMUSG00000062078	protein_coding	utr	chr17-10206471-10209614	chr17-10040507-10041408	165062
chr11-84968402-84969213	0.00154198	-0.379313	0.077	0.182	1	ENSMUST00000108076	Car4	ENSMUSG00000000805	protein_coding	utr	chr11-84965806-84966044	chr11-84968402-84969213	2357
chr14-32076532-32077429	0.00154454	0.125076	0.088	0.071	1	ENSMUST00000022461	Dph3	ENSMUSG00000021905	protein_coding	utr	chr14-32080566-32081269	chr14-32076532-32077429	3136
chr4-95153865-95154295	0.00154547	-0.349802	0.085	0.199	1	ENSMUST00000136941	Gm12708	ENSMUSG00000084918	lincRNA	exon	chr4-95193313-95193404	chr4-95153865-95154295	39017
chr2-120128155-120129101	0.00154826	-0.354807	0.082	0.21	1	ENSMUST00000152366	Ehd4	ENSMUSG00000027293	protein_coding	gap	chr2-120127690-120136898	chr2-120128155-120129101	0
chr17-31384914-31386674	0.0015614	-0.295911	0.065	0.182	1	ENSMUST00000143549	Pde9a	ENSMUSG00000041119	protein_coding	cds	chr17-31386288-31386356	chr17-31384914-31386674	0
chr12-15684032-15684707	0.00156978	-0.401016	0.045	0.134	1	ENSMUST00000020922	Trib2	ENSMUSG00000020601	protein_coding	utr	chr12-15791727-15793607	chr12-15684032-15684707	107019
chr3-84259037-84260437	0.00157686	-0.253411	0.118	0.247	1	ENSMUST00000147901	Trim2	ENSMUSG00000027993	protein_coding	utr	chr3-84259325-84259369	chr3-84259037-84260437	0
chr9-57667670-57668259	0.00157712	-0.436942	0.062	0.167	1	ENSMUST00000034860	Cyp1a2	ENSMUSG00000032310	protein_coding	utr	chr9-57676937-57677227	chr9-57667670-57668259	8677
chr9-109930870-109933308	0.00157715	-0.149973	0.445	0.596	1	ENSMUST00000169851	Map4	ENSMUSG00000032479	protein_coding	utr	chr9-109931774-109931940	chr9-109930870-109933308	0
chr2-31770456-31771581	0.00158052	0.163331	0.235	0.217	1	ENSMUST00000142554	Abl1	ENSMUSG00000026842	protein_coding	gap	chr2-31695893-31778333	chr2-31770456-31771581	0
chr5-64750969-64751647	0.00158638	-0.316067	0.023	0.101	1	ENSMUST00000180799	Gm20033	ENSMUSG00000097640	processed_transcript	gap	chr5-64717213-64804049	chr5-64750969-64751647	0
chr5-72855647-72856151	0.00158959	0.178437	0.102	0.061	1	ENSMUST00000150193	Tec	ENSMUSG00000029217	protein_coding	gap	chr5-72825131-72868393	chr5-72855647-72856151	0
chr13-46970194-46970870	0.00159387	-0.349323	0.03	0.104	1	ENSMUST00000056978	Kif13a	ENSMUSG00000021375	protein_coding	exon	chr13-46929567-46929718	chr13-46970194-46970870	40475
chr11-4308008-4309356	0.0016065	-0.279086	0.028	0.121	1	ENSMUST00000127224	Gm11958	ENSMUSG00000085512	lincRNA	exon	chr11-4286870-4286939	chr11-4308008-4309356	21068
chr10-8911989-8913193	0.00162042	-0.262197	0.047	0.146	1	ENSMUST00000180770	Gm26674	ENSMUSG00000097597	lincRNA	exon	chr10-8885638-8886880	chr10-8911989-8913193	25108
chr13-88828091-88828753	0.00163036	-0.177006	0.012	0.066	1	ENSMUST00000153974	Edil3	ENSMUSG00000034488	protein_coding	gap	chr13-88822049-88944819	chr13-88828091-88828753	0
chr11-90116692-90117511	0.00164212	-0.426066	0.062	0.162	1	ENSMUST00000142279	Gm11494	ENSMUSG00000085074	lincRNA	exon	chr11-90134842-90136235	chr11-90116692-90117511	17330
chr4-32351130-32352271	0.00164238	-0.281777	0.097	0.227	1	ENSMUST00000149201	Bach2	ENSMUSG00000040270	protein_coding	gap	chr4-32317305-32417434	chr4-32351130-32352271	0
chr6-72898568-72900674	0.00164722	-0.208175	0.197	0.356	1	ENSMUST00000068697	Kcmf1	ENSMUSG00000055239	protein_coding	cds	chr6-72899614-72899629	chr6-72898568-72900674	0
chr14-76945662-76945919	0.00165703	-0.34543	0.02	0.081	1	ENSMUST00000062789	Lacc1	ENSMUSG00000044350	protein_coding	utr	chr14-77024200-77024974	chr14-76945662-76945919	78280
chr2-32654640-32656272	0.00166414	-0.34609	0.148	0.288	1	ENSMUST00000167841	Eng	ENSMUSG00000026814	protein_coding	gap	chr2-32647025-32657518	chr2-32654640-32656272	0
chr10-93679088-93679978	0.00167169	-0.346998	0.073	0.179	1	ENSMUST00000020204	Ntn4	ENSMUSG00000020019	protein_coding	gap	chr10-93645001-93682417	chr10-93679088-93679978	0
chr8-113735405-113735911	0.00167438	-0.426169	0.055	0.146	1	ENSMUST00000093113	Adamts18	ENSMUSG00000053399	protein_coding	gap	chr8-113714493-113736680	chr8-113735405-113735911	0
chr9-71606335-71607074	0.00167957	-0.381436	0.117	0.222	1	ENSMUST00000093823	Myzap	ENSMUSG00000041361	protein_coding	exon	chr9-71592190-71592360	chr9-71606335-71607074	13974
chr11-71750594-71751166	0.0016814	-0.354704	0.033	0.104	1	ENSMUST00000108511	Wscd1	ENSMUSG00000020811	protein_coding	utr	chr11-71750980-71751229	chr11-71750594-71751166	0
chr1-73200188-73200455	0.00169397	-0.325113	0.027	0.076	1	ENSMUST00000190578	Gm29185	ENSMUSG00000101112	lincRNA	exon	chr1-73269064-73269169	chr1-73200188-73200455	68608
chr6-4026410-4026657	0.00169595	0.248428	0.053	0.02	1	ENSMUST00000031670	Gng11	ENSMUSG00000032766	protein_coding	utr	chr6-4008161-4008445	chr6-4026410-4026657	17964
chr12-33301692-33303609	0.00169744	0.105187	0.242	0.232	1	ENSMUST00000090597	Atxn7l1	ENSMUSG00000020564	protein_coding	utr	chr12-33302515-33302628	chr12-33301692-33303609	0
chr3-90446233-90447372	0.00171244	-0.247721	0.332	0.49	1	ENSMUST00000029540	Npr1	ENSMUSG00000027931	protein_coding	utr	chr3-90450591-90451119	chr3-90446233-90447372	3218
chr3-52415217-52415657	0.00172431	-0.292461	0.018	0.073	1	ENSMUST00000053764	Foxo1	ENSMUSG00000044167	protein_coding	utr	chr3-52346996-52353221	chr3-52415217-52415657	61995
chr6-39204992-39207574	0.00172726	-0.1786	0.308	0.46	1	ENSMUST00000002305	Kdm7a	ENSMUSG00000042599	protein_coding	cds	chr6-39206441-39206634	chr6-39204992-39207574	0
chr18-36274591-36275196	0.00172806	-0.22652	0.012	0.053	1	ENSMUST00000051301	Pura	ENSMUSG00000043991	protein_coding	exon	chr18-36281097-36281549	chr18-36274591-36275196	5900
chr13-38579732-38581072	0.0017396	-0.329111	0.167	0.313	1	ENSMUST00000035899	Bloc1s5	ENSMUSG00000038982	protein_coding	utr	chr13-38602709-38603848	chr13-38579732-38581072	21636
chr2-11534716-11535980	0.0017419	-0.197341	0.268	0.429	1	ENSMUST00000195779	Pfkfb3	ENSMUSG00000026773	protein_coding	gap	chr2-11494029-11553826	chr2-11534716-11535980	0
chr15-82379589-82380764	0.00174441	-0.259414	0.102	0.237	1	ENSMUST00000023083	Cyp2d22	ENSMUSG00000061740	protein_coding	utr	chr15-82380072-82380260	chr15-82379589-82380764	0
chr4-154180956-154181433	0.00174693	-0.279322	0.045	0.116	1	ENSMUST00000030897	Megf6	ENSMUSG00000057751	protein_coding	gap	chr4-154177174-154182657	chr4-154180956-154181433	0
chr19-29470714-29470986	0.00175036	0.122602	0.05	0.028	1	ENSMUST00000112576	Pdcd1lg2	ENSMUSG00000016498	protein_coding	utr	chr19-29470516-29471157	chr19-29470714-29470986	0
chr13-99238161-99239542	0.00176073	-0.344235	0.067	0.184	1	ENSMUST00000056558	Zfp366	ENSMUSG00000050919	protein_coding	gap	chr13-99234289-99243913	chr13-99238161-99239542	0
chr2-159446775-159447245	0.00176251	-0.359145	0.015	0.076	1	ENSMUST00000146060	Gm14223	ENSMUSG00000086558	lincRNA	exon	chr2-159911773-159911997	chr2-159446775-159447245	464527
chr1-192489798-192490083	0.00176462	-0.29639	0.012	0.053	1	ENSMUST00000151152	Kcnh1	ENSMUSG00000058248	protein_coding	gap	chr1-192453703-192505263	chr1-192489798-192490083	0
chr16-38651715-38652149	0.0017773	-0.384222	0.057	0.157	1	ENSMUST00000132697	Arhgap31	ENSMUSG00000022799	protein_coding	gap	chr16-38640350-38712573	chr16-38651715-38652149	0
chr4-116829357-116829659	0.00178144	-0.323398	0.01	0.061	1	ENSMUST00000055436	Hpdl	ENSMUSG00000043155	protein_coding	exon	chr4-116819904-116821707	chr4-116829357-116829659	7649
chr9-102725986-102726643	0.00178484	-0.307716	0.097	0.227	1	ENSMUST00000190047	Amotl2	ENSMUSG00000032531	protein_coding	gap	chr9-102725196-102728316	chr9-102725986-102726643	0
chr3-102995150-102996481	0.00178698	-0.210549	0.163	0.313	1	ENSMUST00000119450	Sike1	ENSMUSG00000027854	protein_coding	cds	chr3-102995809-102995967	chr3-102995150-102996481	0
chr10-8866002-8866658	0.00178947	-0.333887	0.24	0.389	1	ENSMUST00000015449	Sash1	ENSMUSG00000015305	protein_coding	gap	chr10-8850492-8885723	chr10-8866002-8866658	0
chr7-83914405-83914989	0.00179967	0.149868	0.058	0.035	1	ENSMUST00000094215	Mesdc2	ENSMUSG00000038503	protein_coding	utr	chr7-83898006-83901532	chr7-83914405-83914989	12872
chr19-47279245-47280418	0.00180287	0.213934	0.113	0.066	1	ENSMUST00000111800	Sh3pxd2a	ENSMUSG00000053617	protein_coding	gap	chr19-47278431-47286604	chr19-47279245-47280418	0
chr2-32661246-32662192	0.00181774	-0.387399	0.13	0.273	1	ENSMUST00000167841	Eng	ENSMUSG00000026814	protein_coding	gap	chr2-32657671-32669422	chr2-32661246-32662192	0
chr18-69415349-69416419	0.00183422	-0.330859	0.1	0.237	1	ENSMUST00000155695	Tcf4	ENSMUSG00000053477	protein_coding	gap	chr18-69349145-69461861	chr18-69415349-69416419	0
chr6-42348826-42350784	0.00183425	-0.152695	0.412	0.561	1	ENSMUST00000164375	Zyx	ENSMUSG00000029860	protein_coding	cds	chr6-42350269-42350476	chr6-42348826-42350784	0
chr10-4107549-4108173	0.00184892	-0.375133	0.193	0.343	1	ENSMUST00000120585	Mthfd1l	ENSMUSG00000040675	protein_coding	gap	chr10-4106530-4148008	chr10-4107549-4108173	0
chr10-127297116-127297912	0.00184896	0.163447	0.063	0.035	1	ENSMUST00000171564	Mars	ENSMUSG00000040354	protein_coding	cds	chr10-127297735-127297839	chr10-127297116-127297912	0
chr4-19708259-19709734	0.00185274	-0.183738	0.283	0.444	1	ENSMUST00000108246	Wwp1	ENSMUSG00000041058	protein_coding	utr	chr4-19708839-19708993	chr4-19708259-19709734	0
chr11-97511083-97512461	0.0018537	0.123923	0.12	0.109	1	ENSMUST00000107596	Srcin1	ENSMUSG00000038453	protein_coding	utr	chr11-97509340-97512513	chr11-97511083-97512461	0
chr16-97534554-97536397	0.0018549	0.114281	0.19	0.179	1	ENSMUST00000000395	Tmprss2	ENSMUSG00000000385	protein_coding	utr	chr16-97564684-97566139	chr16-97534554-97536397	28286
chr6-34865806-34866550	0.00185849	-0.294921	0.085	0.207	1	ENSMUST00000123019	Tmem140	ENSMUSG00000057137	protein_coding	gap	chr6-34863341-34868514	chr6-34865806-34866550	0
chr17-88628646-88630503	0.00186575	-0.236696	0.087	0.199	1	ENSMUST00000163588	Ston1	ENSMUSG00000033855	protein_coding	gap	chr17-88626863-88635120	chr17-88628646-88630503	0
chr18-44619761-44620308	0.00187112	-0.333672	0.013	0.066	1	ENSMUST00000164666	Mcc	ENSMUSG00000071856	protein_coding	gap	chr18-44534301-44661697	chr18-44619761-44620308	0
chr17-44229878-44230540	0.00188242	-0.412862	0.085	0.199	1	ENSMUST00000024755	Clic5	ENSMUSG00000023959	protein_coding	gap	chr17-44188962-44237132	chr17-44229878-44230540	0
chr2-127506960-127507475	0.00188267	0.113115	0.062	0.045	1	ENSMUST00000137625	Kcnip3	ENSMUSG00000079056	protein_coding	gap	chr2-127465975-127510828	chr2-127506960-127507475	0
chr6-92464543-92465295	0.00188813	-0.356226	0.102	0.22	1	ENSMUST00000113447	Prickle2	ENSMUSG00000030020	protein_coding	gap	chr6-92458659-92567303	chr6-92464543-92465295	0
chr4-155164529-155164946	0.00189744	-0.322119	0.148	0.278	1	ENSMUST00000129314	Ski	ENSMUSG00000029050	protein_coding	gap	chr4-155160957-155188256	chr4-155164529-155164946	0
chr9-107696768-107697170	0.00190204	-0.405536	0.092	0.202	1	ENSMUST00000194039	Sema3f	ENSMUSG00000034684	protein_coding	gap	chr9-107692717-107705430	chr9-107696768-107697170	0
chr18-5124663-5125669	0.00190496	-0.298774	0.152	0.283	1	ENSMUST00000143254	Svil	ENSMUSG00000024236	protein_coding	utr	chr18-5118433-5119299	chr18-5124663-5125669	5363
chr18-75502339-75503922	0.00194605	-0.226355	0.198	0.341	1	ENSMUST00000165559	Ctif	ENSMUSG00000052928	protein_coding	gap	chr18-75472021-75519738	chr18-75502339-75503922	0
chr11-116019933-116020854	0.00196651	0.166988	0.198	0.157	1	ENSMUST00000106454	H3f3b	ENSMUSG00000016559	protein_coding	utr	chr11-116021912-116023406	chr11-116019933-116020854	1057
chr11-118423118-118424139	0.00197038	0.137562	0.107	0.093	1	ENSMUST00000017620	Cant1	ENSMUSG00000025575	protein_coding	exon	chr11-118417574-118419086	chr11-118423118-118424139	4031
chr11-79864765-79865189	0.001972	-0.394694	0.025	0.104	1	ENSMUST00000131441	9130204K15Rik	ENSMUSG00000086474	lincRNA	gap	chr11-79810275-79871216	chr11-79864765-79865189	0
chr5-75472373-75472881	0.00197763	-0.39897	0.028	0.101	1	ENSMUST00000144270	Kit	ENSMUSG00000005672	protein_coding	exon	chr5-75574916-75575118	chr5-75472373-75472881	102034
chr15-101147016-101148250	0.00197825	-0.284782	0.115	0.263	1	ENSMUST00000120754	Acvrl1	ENSMUSG00000000530	protein_coding	utr	chr15-101143478-101145336	chr15-101147016-101148250	1679
chr17-43407300-43407962	0.00198318	-0.408927	0.047	0.154	1	ENSMUST00000113599	Gpr116	ENSMUSG00000056492	protein_coding	gap	chr17-43404044-43410501	chr17-43407300-43407962	0
chr4-137967798-137968567	0.00199336	0.134046	0.088	0.073	1	ENSMUST00000102518	Ece1	ENSMUSG00000057530	protein_coding	utr	chr4-137962907-137965229	chr4-137967798-137968567	2568
chr18-38890038-38890564	0.00199807	0.134429	0.058	0.04	1	ENSMUST00000148850	Arhgap26	ENSMUSG00000036452	protein_coding	gap	chr18-38676806-38933792	chr18-38890038-38890564	0
chr1-132040158-132040589	0.00201659	-0.35566	0.065	0.146	1	ENSMUST00000161864	Mfsd4	ENSMUSG00000059149	protein_coding	cds	chr1-132040540-132040660	chr1-132040158-132040589	0
chr7-118470237-118470824	0.00203428	-0.333243	0.052	0.139	1	ENSMUST00000178344	Itpripl2	ENSMUSG00000095115	protein_coding	utr	chr7-118485114-118489726	chr7-118470237-118470824	14289
chr4-55604640-55605344	0.00204687	-0.399919	0.087	0.194	1	ENSMUST00000123620	Gm12506	ENSMUSG00000085375	lincRNA	gap	chr4-55605202-55605392	chr4-55604640-55605344	0
chr8-35665307-35666206	0.00205928	-0.232245	0.025	0.101	1	ENSMUST00000154989	Mfhas1	ENSMUSG00000070056	protein_coding	gap	chr8-35664795-35671721	chr8-35665307-35666206	0
chr11-19919399-19920714	0.00206066	-0.206945	0.158	0.298	1	ENSMUST00000093299	Spred2	ENSMUSG00000045671	protein_coding	exon	chr11-19924375-19924956	chr11-19919399-19920714	3660
chr6-119584969-119586349	0.00206217	0.163675	0.052	0.023	1	ENSMUST00000185143	Erc1	ENSMUSG00000030172	protein_coding	gap	chr6-119575763-119594784	chr6-119584969-119586349	0
chr17-29541205-29541977	0.00206372	0.207579	0.105	0.066	1	ENSMUST00000168339	Tmem217	ENSMUSG00000079580	protein_coding	gap	chr17-29526760-29549508	chr17-29541205-29541977	0
chr11-100395210-100395618	0.00206488	-0.297403	0.058	0.167	1	ENSMUST00000155746	Jup	ENSMUSG00000001552	protein_coding	gap	chr11-100386389-100397635	chr11-100395210-100395618	0
chr11-5846529-5847220	0.00206777	0.237412	0.125	0.088	1	ENSMUST00000020767	Polm	ENSMUSG00000020474	protein_coding	exon	chr11-5837561-5838016	chr11-5846529-5847220	8512
chr1-51225124-51225899	0.00207007	-0.32247	0.02	0.076	1	ENSMUST00000190705	Gm29325	ENSMUSG00000099625	lincRNA	exon	chr1-51195221-51197748	chr1-51225124-51225899	27375
chr18-38024868-38025821	0.00207221	0.100056	0.063	0.058	1	ENSMUST00000042944	Arap3	ENSMUSG00000024451	protein_coding	exon	chr18-37997533-37997574	chr18-38024868-38025821	27293
chr14-31227939-31229083	0.00207502	-0.287385	0.095	0.212	1	ENSMUST00000090180	Sema3g	ENSMUSG00000021904	protein_coding	cds	chr14-31227742-31228206	chr14-31227939-31229083	0
chr5-92841247-92841815	0.0020759	-0.306717	0.028	0.096	1	ENSMUST00000168878	Shroom3	ENSMUSG00000029381	protein_coding	gap	chr5-92780908-92919644	chr5-92841247-92841815	0
chr1-90282354-90282845	0.00207722	-0.312004	0.005	0.051	1	ENSMUST00000188640	Gm28723	ENSMUSG00000101028	lincRNA	gap	chr1-90280607-90283060	chr1-90282354-90282845	0
chr8-104121378-104122422	0.00208693	-0.424395	0.14	0.288	1	ENSMUST00000034339	Cdh5	ENSMUSG00000031871	protein_coding	gap	chr8-104113103-104125458	chr8-104121378-104122422	0
chr3-152209324-152211262	0.00212944	-0.17987	0.29	0.455	1	ENSMUST00000166984	Fubp1	ENSMUSG00000028034	protein_coding	cds	chr3-152210593-152210700	chr3-152209324-152211262	0
chr11-31759645-31760615	0.00213472	-0.241233	0.035	0.116	1	ENSMUST00000129425	D630024D03Rik	ENSMUSG00000085772	lincRNA	exon	chr11-31790113-31790425	chr11-31759645-31760615	29497
chr14-31172468-31173317	0.00213759	0.227847	0.27	0.22	1	ENSMUST00000169628	Nisch	ENSMUSG00000021910	protein_coding	cds	chr14-31173064-31173192	chr14-31172468-31173317	0
chr7-126374504-126375309	0.00213848	0.101554	0.052	0.03	1	ENSMUST00000150476	Spns1	ENSMUSG00000030741	protein_coding	cds	chr7-126375067-126375203	chr7-126374504-126375309	0
chr12-101717866-101719060	0.00213854	0.14823	0.152	0.141	1	ENSMUST00000162735	Tc2n	ENSMUSG00000021187	protein_coding	utr	chr12-101718402-101718523	chr12-101717866-101719060	0
chr4-148083445-148083720	0.00215057	0.183966	0.083	0.048	1	ENSMUST00000152323	Agtrap	ENSMUSG00000029007	protein_coding	gap	chr4-148082377-148083958	chr4-148083445-148083720	0
chr11-79319579-79320091	0.00215519	-0.389147	0.02	0.088	1	ENSMUST00000145839	Nf1	ENSMUSG00000020716	protein_coding	exon	chr11-79339693-79340059	chr11-79319579-79320091	19601
chr6-89045599-89045884	0.00215786	-0.267101	0.015	0.068	1	ENSMUST00000168837	4933427D06Rik	ENSMUSG00000055403	protein_coding	gap	chr6-88950714-89101509	chr6-89045599-89045884	0
chr13-114986983-114987585	0.00216242	-0.364098	0.085	0.194	1	ENSMUST00000061673	Itga1	ENSMUSG00000042284	protein_coding	gap	chr13-114986267-114987602	chr13-114986983-114987585	0
chr3-15118573-15119263	0.0021737	-0.281181	0.007	0.053	1	ENSMUST00000194008	RP24-150C17.1	ENSMUSG00000103912	lincRNA	exon	chr3-15153065-15153707	chr3-15118573-15119263	33801
chr7-44951774-44953189	0.00217909	0.107504	0.225	0.215	1	ENSMUST00000120929	Tsks	ENSMUSG00000059891	protein_coding	cds	chr7-44952546-44952832	chr7-44951774-44953189	0
chr17-70753412-70753932	0.00218408	0.132502	0.165	0.149	1	ENSMUST00000181546	5031415H12Rik	ENSMUSG00000097282	lincRNA	gap	chr17-70752100-70755067	chr17-70753412-70753932	0
chr11-60360447-60360911	0.00219577	-0.392563	0.045	0.124	1	ENSMUST00000128905	Lrrc48	ENSMUSG00000056598	protein_coding	gap	chr11-60354201-60363463	chr11-60360447-60360911	0
chr18-46596801-46598695	0.00219654	0.100988	0.432	0.429	1	ENSMUST00000151189	Tmed7	ENSMUSG00000033184	protein_coding	cds	chr18-46597091-46597282	chr18-46596801-46598695	0
chr19-47905104-47905918	0.00220177	-0.19045	0.027	0.116	1	ENSMUST00000095998	Cfap43	ENSMUSG00000044948	protein_coding	gap	chr19-47898186-47919123	chr19-47905104-47905918	0
chr8-94998958-94999196	0.00220264	-0.404234	0.063	0.164	1	ENSMUST00000179619	Gpr56	ENSMUSG00000031785	protein_coding	gap	chr8-94977418-95002438	chr8-94998958-94999196	0
chr17-15375018-15377159	0.00220345	-0.292427	0.143	0.308	1	ENSMUST00000014917	Dll1	ENSMUSG00000014773	protein_coding	cds	chr17-15375187-15375240	chr17-15375018-15377159	0
chr10-25427348-25427939	0.00220431	-0.375694	0.082	0.197	1	ENSMUST00000092645	Epb4.1l2	ENSMUSG00000019978	protein_coding	gap	chr10-25408443-25441572	chr10-25427348-25427939	0
chr17-10095673-10096145	0.00221203	-0.408431	0.082	0.187	1	ENSMUST00000097414	Qk	ENSMUSG00000062078	protein_coding	utr	chr17-10206471-10209614	chr17-10095673-10096145	110325
chr4-147867594-147869173	0.00221271	0.100207	0.375	0.394	1	ENSMUST00000094481	Fv1	ENSMUSG00000070583	protein_coding	cds	chr4-147868979-147870358	chr4-147867594-147869173	0
chr2-5577386-5578070	0.00221418	-0.272861	0.025	0.101	1	ENSMUST00000155927	Camk1d	ENSMUSG00000039145	protein_coding	gap	chr2-5565781-5714145	chr2-5577386-5578070	0
chr1-60652348-60653132	0.00221567	-0.264159	0.038	0.111	1	ENSMUST00000132833	Cd28	ENSMUSG00000026012	protein_coding	exon	chr1-60716800-60717001	chr1-60652348-60653132	63667
chr3-105877141-105878252	0.00221709	-0.279677	0.033	0.126	1	ENSMUST00000164730	Adora3	ENSMUSG00000000562	protein_coding	gap	chr3-105871012-105907288	chr3-105877141-105878252	0
chr6-8208560-8209923	0.00221798	-0.198501	0.272	0.429	1	ENSMUST00000040017	Mios	ENSMUSG00000042447	protein_coding	utr	chr6-8209222-8209411	chr6-8208560-8209923	0
chr5-3472550-3473073	0.00222236	-0.27684	0.012	0.068	1	ENSMUST00000168422	Gm17590	ENSMUSG00000091644	protein_coding	cds	chr5-3473071-3473178	chr5-3472550-3473073	0
chr11-21090775-21092298	0.00222254	-0.189133	0.258	0.437	1	ENSMUST00000093290	Peli1	ENSMUSG00000020134	protein_coding	utr	chr11-21091291-21091678	chr11-21090775-21092298	0
chr6-48537325-48537741	0.0022231	-0.26564	0.035	0.101	1	ENSMUST00000040361	Atp6v0e2	ENSMUSG00000039347	protein_coding	utr	chr6-48537569-48537750	chr6-48537325-48537741	0
chr1-75316517-75318202	0.00223088	-0.101868	0.64	0.75	1	ENSMUST00000191254	Dnpep	ENSMUSG00000026209	protein_coding	cds	chr1-75317335-75317340	chr1-75316517-75318202	0
chr5-111267134-111267376	0.00223587	-0.373638	0.075	0.157	1	ENSMUST00000156290	Ttc28	ENSMUSG00000033209	protein_coding	gap	chr5-111266676-111271194	chr5-111267134-111267376	0
chr15-78801941-78804512	0.00224559	-0.234823	0.235	0.399	1	ENSMUST00000170584	Card10	ENSMUSG00000033170	protein_coding	cds	chr15-78802381-78802615	chr15-78801941-78804512	0
chr2-166398934-166400041	0.00224852	0.129881	0.093	0.076	1	ENSMUST00000132465	Gm14268	ENSMUSG00000087617	lincRNA	exon	chr2-166398021-166398187	chr2-166398934-166400041	746
chr6-143315678-143316319	0.00225402	-0.361817	0.052	0.139	1	ENSMUST00000100817	D6Ertd474e	ENSMUSG00000072679	lincRNA	exon	chr6-143295614-143297272	chr6-143315678-143316319	18405
chr14-21903437-21905274	0.00226084	-0.178446	0.023	0.093	1	ENSMUST00000169054	A430057M04Rik	ENSMUSG00000090564	processed_transcript	exon	chr14-21853834-21856926	chr14-21903437-21905274	46510
chr4-47056683-47057792	0.00226518	-0.23901	0.092	0.21	1	ENSMUST00000107747	Anks6	ENSMUSG00000066191	protein_coding	cds	chr4-47056949-47057280	chr4-47056683-47057792	0
chr19-35924180-35924732	0.0022705	0.301808	0.123	0.068	1	ENSMUST00000178904	A830019P07Rik	ENSMUSG00000094707	lincRNA	gap	chr19-35923548-35924369	chr19-35924180-35924732	0
chr15-52039788-52040626	0.00227267	-0.221611	0.01	0.056	1	ENSMUST00000090025	Aard	ENSMUSG00000068522	protein_coding	cds	chr15-52040183-52040530	chr15-52039788-52040626	0
chr11-71594265-71594660	0.00227797	-0.330249	0.012	0.058	1	ENSMUST00000151841	9230020A06Rik	ENSMUSG00000072753	lincRNA	exon	chr11-71572204-71573183	chr11-71594265-71594660	21081
chr8-121200546-121201456	0.00228254	-0.374267	0.067	0.167	1	ENSMUST00000180796	5033426O07Rik	ENSMUSG00000097097	lincRNA	gap	chr8-121200487-121201542	chr8-121200546-121201456	0
chr13-103977776-103978887	0.00228392	-0.254943	0.035	0.116	1	ENSMUST00000109315	Nln	ENSMUSG00000021710	protein_coding	utr	chr13-104023439-104024945	chr13-103977776-103978887	44551
chr11-85511036-85511727	0.00228597	-0.343245	0.015	0.076	1	ENSMUST00000154396	Bcas3	ENSMUSG00000059439	protein_coding	gap	chr11-85509693-85531792	chr11-85511036-85511727	0
chr16-29945154-29946640	0.00228813	-0.253739	0.173	0.328	1	ENSMUST00000181968	Gm26569	ENSMUSG00000097313	lincRNA	gap	chr16-29910596-29946453	chr16-29945154-29946640	0
chr6-101215179-101215737	0.0022942	-0.268142	0.012	0.061	1	ENSMUST00000151175	Pdzrn3	ENSMUSG00000035357	protein_coding	gap	chr6-101180127-101354393	chr6-101215179-101215737	0
chr11-101997825-101998637	0.00230428	-0.256336	0.018	0.068	1	ENSMUST00000107168	Mpp3	ENSMUSG00000052373	protein_coding	utr	chr11-101999652-102000552	chr11-101997825-101998637	1014
chr14-22269706-22270279	0.00230697	-0.438201	0.047	0.144	1	ENSMUST00000162540	1700112E06Rik	ENSMUSG00000063458	protein_coding	gap	chr14-22027328-22577847	chr14-22269706-22270279	0
chr7-81131789-81133313	0.00231035	0.190172	0.137	0.098	1	ENSMUST00000119083	Slc28a1	ENSMUSG00000025726	protein_coding	gap	chr7-81127790-81138161	chr7-81131789-81133313	0
chr8-8819087-8819833	0.00234037	-0.430977	0.083	0.194	1	ENSMUST00000048545	Arglu1	ENSMUSG00000040459	protein_coding	exon	chr8-8689977-8690537	chr8-8819087-8819833	128549
chr6-108456254-108458421	0.00234064	0.123671	0.183	0.174	1	ENSMUST00000032192	Itpr1	ENSMUSG00000030102	protein_coding	gap	chr6-108440688-108471022	chr6-108456254-108458421	0
chr9-13910090-13910457	0.00236661	0.30986	0.1	0.048	1	ENSMUST00000156680	Fam76b	ENSMUSG00000037808	protein_coding	utr	chr9-13844029-13846541	chr9-13910090-13910457	63548
chr14-121580555-121580984	0.00238279	-0.305635	0.02	0.081	1	ENSMUST00000100299	Dock9	ENSMUSG00000025558	protein_coding	cds	chr14-121580485-121580700	chr14-121580555-121580984	0
chr16-95824669-95825518	0.00239689	-0.306394	0.19	0.333	1	ENSMUST00000136744	1600002D24Rik	ENSMUSG00000086899	lincRNA	exon	chr16-95831123-95832494	chr16-95824669-95825518	5604
chr13-111787926-111788683	0.00241183	0.111915	0.103	0.096	1	ENSMUST00000145055	Map3k1	ENSMUSG00000021754	protein_coding	gap	chr13-111776019-111808246	chr13-111787926-111788683	0
chr12-27171439-27171949	0.00241555	-0.359903	0.025	0.088	1	ENSMUST00000182592	Gm9866	ENSMUSG00000094002	lincRNA	exon	chr12-27160230-27160633	chr12-27171439-27171949	10805
chr5-63951361-63951915	0.0024186	-0.249027	0.015	0.073	1	ENSMUST00000154169	Rell1	ENSMUSG00000047881	protein_coding	gap	chr5-63938034-63968645	chr5-63951361-63951915	0
chr17-29268270-29269507	0.00241945	-0.199205	0.203	0.374	1	ENSMUST00000120346	BC004004	ENSMUSG00000052712	protein_coding	utr	chr17-29268843-29269002	chr17-29268270-29269507	0
chr18-60661156-60661776	0.0024236	-0.302869	0.09	0.184	1	ENSMUST00000137894	Synpo	ENSMUSG00000043079	protein_coding	exon	chr18-60660102-60660142	chr18-60661156-60661776	1013
chr15-78401866-78402173	0.00243338	0.125854	0.05	0.03	1	ENSMUST00000058659	Tst	ENSMUSG00000044986	protein_coding	gap	chr15-78400031-78405238	chr15-78401866-78402173	0
chr16-37851274-37851725	0.00244252	-0.423609	0.078	0.194	1	ENSMUST00000122653	n-R5s34	ENSMUSG00000084602	rRNA	exon	chr16-37854782-37854897	chr16-37851274-37851725	3056
chr6-134575028-134575835	0.00244253	-0.370879	0.05	0.139	1	ENSMUST00000126836	Lrp6	ENSMUSG00000030201	protein_coding	exon	chr6-134566643-134566965	chr6-134575028-134575835	8062
chr8-123137514-123138102	0.00245716	0.134838	0.055	0.035	1	ENSMUST00000127664	Gm20388	ENSMUSG00000092329	protein_coding	gap	chr8-119910940-124295357	chr8-123137514-123138102	0
chr7-132315331-132317576	0.00246216	-0.200162	0.187	0.338	1	ENSMUST00000080215	Chst15	ENSMUSG00000030930	protein_coding	utr	chr7-132317047-132317228	chr7-132315331-132317576	0
chr13-108315499-108317043	0.00246378	-0.198807	0.163	0.316	1	ENSMUST00000171178	Depdc1b	ENSMUSG00000021697	protein_coding	cds	chr13-108316422-108316469	chr13-108315499-108317043	0
chr4-130177054-130177473	0.00246422	-0.373918	0.082	0.202	1	ENSMUST00000105998	Tinagl1	ENSMUSG00000028776	protein_coding	exon	chr4-130174902-130175122	chr4-130177054-130177473	1931
chr13-109641283-109642000	0.00247293	-0.288376	0.023	0.086	1	ENSMUST00000177907	Pde4d	ENSMUSG00000021699	protein_coding	gap	chr13-109032698-109740386	chr13-109641283-109642000	0
chr6-54399299-54400063	0.00248418	0.22609	0.073	0.035	1	ENSMUST00000145111	9130019P16Rik	ENSMUSG00000073067	lincRNA	gap	chr6-54332011-54401024	chr6-54399299-54400063	0
chr17-27969356-27969737	0.00248687	-0.355169	0.047	0.136	1	ENSMUST00000114842	Anks1	ENSMUSG00000024219	protein_coding	gap	chr17-27909647-27974904	chr17-27969356-27969737	0
chr4-89127778-89128458	0.00250009	-0.175913	0.015	0.068	1	ENSMUST00000154352	Gm12602	ENSMUSG00000085569	processed_transcript	gap	chr4-89118676-89128162	chr4-89127778-89128458	0
chr3-105820409-105820608	0.00252144	-0.29569	0.007	0.053	1	ENSMUST00000090678	Rap1a	ENSMUSG00000068798	protein_coding	exon	chr3-105801239-105801330	chr3-105820409-105820608	19078
chr6-115791952-115793269	0.00253672	0.167892	0.087	0.063	1	ENSMUST00000075995	Cand2	ENSMUSG00000030319	protein_coding	cds	chr6-115791669-115793171	chr6-115791952-115793269	0
chr16-4593878-4595965	0.00254225	-0.235815	0.18	0.321	1	ENSMUST00000014447	Glis2	ENSMUSG00000014303	protein_coding	utr	chr16-4594713-4594935	chr16-4593878-4595965	0
chr13-47223632-47224863	0.00255396	-0.318295	0.04	0.131	1	ENSMUST00000110111	Rnf144b	ENSMUSG00000038068	protein_coding	gap	chr13-47220599-47228939	chr13-47223632-47224863	0
chr1-119209564-119209924	0.00257778	-0.289613	0.018	0.066	1	ENSMUST00000189894	Gm29456	ENSMUSG00000099860	lincRNA	exon	chr1-119305346-119305675	chr1-119209564-119209924	95421
chr14-64050433-64051109	0.00257898	-0.391402	0.04	0.119	1	ENSMUST00000058229	Rp1l1	ENSMUSG00000046049	protein_coding	utr	chr14-64032547-64033504	chr14-64050433-64051109	16928
chr2-18055588-18058045	0.00258212	-0.140025	0.455	0.606	1	ENSMUST00000125173	1810059C17Rik	ENSMUSG00000086340	processed_transcript	gap	chr2-18055822-18056519	chr2-18055588-18058045	0
chr7-89411947-89412412	0.00258229	-0.252516	0.017	0.068	1	ENSMUST00000058755	Fzd4	ENSMUSG00000049791	protein_coding	utr	chr7-89408361-89410110	chr7-89411947-89412412	1836
chr1-190518014-190518505	0.00258603	0.329483	0.118	0.063	1	ENSMUST00000195170	RP24-240P15.2	ENSMUSG00000103510	lincRNA	exon	chr1-190444509-190444855	chr1-190518014-190518505	73158
chr7-89773112-89774086	0.00259624	-0.393689	0.117	0.235	1	ENSMUST00000160995	Me3	ENSMUSG00000030621	protein_coding	gap	chr7-89739957-89786425	chr7-89773112-89774086	0
chr2-145799012-145799217	0.00260213	-0.373351	0.025	0.096	1	ENSMUST00000150449	Rin2	ENSMUSG00000001768	protein_coding	gap	chr2-145786415-145822264	chr2-145799012-145799217	0
chr4-82512502-82513581	0.00260525	-0.200943	0.283	0.432	1	ENSMUST00000155821	Nfib	ENSMUSG00000008575	protein_coding	gap	chr4-82498770-82705514	chr4-82512502-82513581	0
chr10-79805580-79805938	0.00260991	0.284117	0.147	0.096	1	ENSMUST00000105379	Palm	ENSMUSG00000035863	protein_coding	gap	chr10-79793741-79806639	chr10-79805580-79805938	0
chr4-95310335-95310890	0.00261115	-0.237498	0.013	0.051	1	ENSMUST00000187014	Gm29064	ENSMUSG00000100129	lincRNA	exon	chr4-95401978-95402790	chr4-95310335-95310890	91087
chr3-148343123-148344448	0.00262098	-0.316535	0.047	0.149	1	ENSMUST00000106128	Lphn2	ENSMUSG00000028184	protein_coding	utr	chr3-148815586-148817173	chr3-148343123-148344448	471137
chr6-87730384-87731531	0.002632	0.156967	0.107	0.088	1	ENSMUST00000159570	Efcc1	ENSMUSG00000068263	protein_coding	cds	chr6-87730893-87731540	chr6-87730384-87731531	0
chr10-122985211-122986606	0.00263651	-0.188019	0.23	0.402	1	ENSMUST00000170935	Mon2	ENSMUSG00000034602	protein_coding	utr	chr10-122992061-122995669	chr10-122985211-122986606	5454
chr14-64014963-64015336	0.0026422	-0.374633	0.022	0.086	1	ENSMUST00000058229	Rp1l1	ENSMUSG00000046049	protein_coding	gap	chr14-63992629-64021889	chr14-64014963-64015336	0
chr17-83311711-83312943	0.00264691	-0.214834	0.072	0.194	1	ENSMUST00000049503	Eml4	ENSMUSG00000032624	protein_coding	exon	chr17-83350931-83351239	chr17-83311711-83312943	37987
chr12-15797919-15798387	0.0026603	-0.27972	0.025	0.093	1	ENSMUST00000020922	Trib2	ENSMUSG00000020601	protein_coding	gap	chr12-15794077-15809695	chr12-15797919-15798387	0
chr12-112897184-112898273	0.00266981	-0.272222	0.138	0.285	1	ENSMUST00000075827	Jag2	ENSMUSG00000002799	protein_coding	utr	chr12-112908590-112908888	chr12-112897184-112898273	10316
chr15-101233216-101234052	0.00268485	0.160794	0.073	0.035	1	ENSMUST00000000543	Grasp	ENSMUSG00000000531	protein_coding	utr	chr15-101232017-101232755	chr15-101233216-101234052	460
chr1-59912316-59914281	0.00269093	-0.16583	0.348	0.497	1	ENSMUST00000036540	Fam117b	ENSMUSG00000041040	protein_coding	cds	chr1-59913164-59913752	chr1-59912316-59914281	0
chr5-122693542-122694074	0.0027143	-0.291812	0.022	0.081	1	ENSMUST00000031425	P2rx7	ENSMUSG00000029468	protein_coding	utr	chr5-122691292-122691432	chr5-122693542-122694074	2109
chr6-42381829-42382452	0.00272407	-0.281444	0.047	0.119	1	ENSMUST00000073387	Epha1	ENSMUSG00000029859	protein_coding	exon	chr6-42373126-42373268	chr6-42381829-42382452	8560
chr4-32306428-32306720	0.00274136	-0.24418	0.015	0.066	1	ENSMUST00000156430	Bach2	ENSMUSG00000040270	protein_coding	gap	chr4-32248063-32317197	chr4-32306428-32306720	0
chr10-28113664-28114200	0.00274439	-0.334851	0.025	0.093	1	ENSMUST00000166468	Ptprk	ENSMUSG00000019889	protein_coding	gap	chr10-28075178-28206133	chr10-28113664-28114200	0
chr5-120706404-120707225	0.00274926	0.184479	0.182	0.146	1	ENSMUST00000031607	Dtx1	ENSMUSG00000029603	protein_coding	gap	chr5-120695113-120710054	chr5-120706404-120707225	0
chr6-125313085-125314482	0.00275062	-0.235945	0.215	0.389	1	ENSMUST00000032489	Ltbr	ENSMUSG00000030339	protein_coding	cds	chr6-125313590-125313685	chr6-125313085-125314482	0
chr8-120416201-120417391	0.00275072	-0.273404	0.148	0.285	1	ENSMUST00000180448	Gse1	ENSMUSG00000031822	protein_coding	gap	chr8-120354180-120553583	chr8-120416201-120417391	0
chrX-53645902-53646194	0.00275077	-0.342174	0.013	0.068	1	ENSMUST00000088779	Cxx1a	ENSMUSG00000067925	protein_coding	exon	chrX-53642488-53643682	chrX-53645902-53646194	2219
chr5-134740167-134741436	0.00275155	0.206406	0.207	0.172	1	ENSMUST00000015138	Eln	ENSMUSG00000029675	protein_coding	gap	chr5-134739573-134747156	chr5-134740167-134741436	0
chr5-66559341-66560201	0.00275695	-0.385685	0.07	0.182	1	ENSMUST00000162994	Apbb2	ENSMUSG00000029207	protein_coding	gap	chr5-66492173-66618567	chr5-66559341-66560201	0
chr2-155806601-155806890	0.00275802	-0.299795	0.013	0.066	1	ENSMUST00000029141	Mmp24	ENSMUSG00000027612	protein_coding	gap	chr2-155799990-155807400	chr2-155806601-155806890	0
chr11-32358360-32358707	0.00275828	-0.19405	0.023	0.076	1	ENSMUST00000138771	Sh3pxd2b	ENSMUSG00000040711	protein_coding	gap	chr11-32347969-32371517	chr11-32358360-32358707	0
chr10-76970583-76971368	0.00276896	-0.354326	0.018	0.086	1	ENSMUST00000105411	Pcbp3	ENSMUSG00000001120	protein_coding	exon	chr10-76961748-76961887	chr10-76970583-76971368	8695
chr16-85152202-85152925	0.00277165	-0.139945	0.01	0.073	1	ENSMUST00000005406	App	ENSMUSG00000022892	protein_coding	gap	chr16-85120698-85173501	chr16-85152202-85152925	0
chr7-28820616-28821706	0.00277859	0.108213	0.107	0.088	1	ENSMUST00000174548	Hnrnpl	ENSMUSG00000015165	protein_coding	cds	chr7-28821392-28821487	chr7-28820616-28821706	0
chr4-94746175-94746839	0.00278847	-0.391812	0.125	0.242	1	ENSMUST00000102798	Tek	ENSMUSG00000006386	protein_coding	gap	chr4-94739693-94780815	chr4-94746175-94746839	0
chr11-5999718-6001064	0.00281208	-0.207432	0.157	0.293	1	ENSMUST00000154197	Camk2b	ENSMUSG00000057897	protein_coding	gap	chr11-5997949-6001337	chr11-5999718-6001064	0
chr10-70200811-70201289	0.0028179	-0.270452	0.028	0.098	1	ENSMUST00000188568	2310015B20Rik	ENSMUSG00000019933	processed_transcript	exon	chr10-70204664-70204759	chr10-70200811-70201289	3374
chr13-29983670-29986782	0.00282789	-0.135326	0.487	0.614	1	ENSMUST00000146092	E2f3	ENSMUSG00000016477	protein_coding	cds	chr13-29984128-29984145	chr13-29983670-29986782	0
chr2-116417468-116418101	0.00282855	-0.299803	0.028	0.088	1	ENSMUST00000152412	G630016G05Rik	ENSMUSG00000086308	lincRNA	exon	chr2-116085795-116085911	chr2-116417468-116418101	331556
chr15-10713751-10715415	0.00283082	-0.266993	0.195	0.338	1	ENSMUST00000169385	Rai14	ENSMUSG00000022246	protein_coding	utr	chr15-10714523-10714631	chr15-10713751-10715415	0
chr1-131962415-131963984	0.0028345	0.187612	0.173	0.149	1	ENSMUST00000177943	Slc45a3	ENSMUSG00000026435	protein_coding	utr	chr1-131962967-131963052	chr1-131962415-131963984	0
chr1-33583787-33584856	0.00284958	-0.153683	0.008	0.058	1	ENSMUST00000189552	Prim2	ENSMUSG00000026134	protein_coding	gap	chr1-33533364-33622063	chr1-33583787-33584856	0
chr3-31093325-31095973	0.00285116	-0.114662	0.575	0.687	1	ENSMUST00000123532	Skil	ENSMUSG00000027660	protein_coding	utr	chr3-31095065-31095157	chr3-31093325-31095973	0
chr12-70144122-70144346	0.00285917	-0.349591	0.027	0.098	1	ENSMUST00000162570	Abhd12b	ENSMUSG00000090121	protein_coding	exon	chr12-70154142-70154265	chr12-70144122-70144346	9795
chr12-52288529-52288870	0.0029213	-0.29814	0.023	0.081	1	ENSMUST00000159567	Nubpl	ENSMUSG00000035142	protein_coding	gap	chr12-52241440-52302680	chr12-52288529-52288870	0
chr1-39710137-39710867	0.00293677	-0.310167	0.052	0.141	1	ENSMUST00000151913	Rfx8	ENSMUSG00000057173	protein_coding	cds	chr1-39710158-39710244	chr1-39710137-39710867	0
chr12-102328132-102328534	0.00294381	-0.302074	0.055	0.149	1	ENSMUST00000133820	Rin3	ENSMUSG00000044456	protein_coding	gap	chr12-102325913-102350881	chr12-102328132-102328534	0
chr8-72272405-72274196	0.00295136	-0.224057	0.087	0.199	1	ENSMUST00000003117	Ap1m1	ENSMUSG00000003033	protein_coding	utr	chr8-72256758-72257385	chr8-72272405-72274196	15019
chr8-47989484-47991554	0.002988	-0.192031	0.307	0.472	1	ENSMUST00000057561	Wwc2	ENSMUSG00000031563	protein_coding	cds	chr8-47990066-47990196	chr8-47989484-47991554	0
chr19-57180219-57181232	0.00299818	-0.259694	0.025	0.091	1	ENSMUST00000156316	Ablim1	ENSMUSG00000025085	protein_coding	gap	chr19-57173460-57314692	chr19-57180219-57181232	0
chr11-58214261-58215019	0.00300123	-0.227554	0.06	0.174	1	ENSMUST00000058704	Irgm2	ENSMUSG00000069874	protein_coding	gap	chr11-58199780-58219463	chr11-58214261-58215019	0
chr9-50738848-50739881	0.00300815	-0.205701	0.088	0.215	1	ENSMUST00000121634	Dixdc1	ENSMUSG00000032064	protein_coding	utr	chr9-50739266-50739517	chr9-50738848-50739881	0
chr17-34109253-34110095	0.00300923	0.118249	0.132	0.096	1	ENSMUST00000114242	Brd2	ENSMUSG00000024335	protein_coding	utr	chr17-34112023-34112574	chr17-34109253-34110095	1927
chr7-109579974-109580817	0.00301167	-0.320464	0.028	0.098	1	ENSMUST00000168005	St5	ENSMUSG00000031024	protein_coding	gap	chr7-109570112-109617057	chr7-109579974-109580817	0
chr14-31182793-31184082	0.00301305	0.133779	0.092	0.066	1	ENSMUST00000172142	Nisch	ENSMUSG00000021910	protein_coding	utr	chr14-31183313-31184377	chr14-31182793-31184082	0
chr16-30596855-30597559	0.00301535	0.104899	0.11	0.104	1	ENSMUST00000059078	Fam43a	ENSMUSG00000046546	protein_coding	exon	chr16-30599723-30602797	chr16-30596855-30597559	2163
chr7-24469194-24469721	0.00302898	-0.154677	0.012	0.053	1	ENSMUST00000002284	Plaur	ENSMUSG00000046223	protein_coding	gap	chr7-24466819-24471898	chr7-24469194-24469721	0
chr19-47325925-47326213	0.003039	-0.195001	0.015	0.051	1	ENSMUST00000111800	Sh3pxd2a	ENSMUSG00000053617	protein_coding	gap	chr19-47320321-47343439	chr19-47325925-47326213	0
chr12-86931774-86932940	0.00303923	-0.265281	0.16	0.298	1	ENSMUST00000185434	Cipc	ENSMUSG00000034157	protein_coding	exon	chr12-86947043-86947250	chr12-86931774-86932940	14102
chr7-98573189-98573678	0.00305329	-0.380467	0.062	0.164	1	ENSMUST00000069035	A630091E08Rik	ENSMUSG00000055446	protein_coding	exon	chr7-98562843-98562988	chr7-98573189-98573678	10200
chr18-64985048-64985502	0.00307238	-0.341676	0.027	0.088	1	ENSMUST00000163516	Nedd4l	ENSMUSG00000024589	protein_coding	gap	chr18-64888096-64997347	chr18-64985048-64985502	0
chr3-98381742-98383654	0.00309597	-0.276782	0.078	0.179	1	ENSMUST00000178372	Zfp697	ENSMUSG00000050064	protein_coding	utr	chr3-98382548-98382578	chr3-98381742-98383654	0
chr4-57833913-57834657	0.00310199	-0.278548	0.043	0.141	1	ENSMUST00000150412	Palm2Akap2	ENSMUSG00000089945	protein_coding	gap	chr4-57757684-57854561	chr4-57833913-57834657	0
chr12-50648282-50649610	0.00310377	-0.2918	0.113	0.237	1	ENSMUST00000002765	Prkd1	ENSMUSG00000002688	protein_coding	cds	chr12-50648716-50648973	chr12-50648282-50649610	0
chr15-101370055-101370757	0.00310891	-0.266866	0.09	0.199	1	ENSMUST00000077196	Krt80	ENSMUSG00000037185	protein_coding	cds	chr15-101369755-101370054	chr15-101370055-101370757	0
chr9-40806440-40806819	0.00312125	0.12182	0.08	0.056	1	ENSMUST00000117870	Hspa8	ENSMUSG00000015656	protein_coding	utr	chr9-40805191-40805200	chr9-40806440-40806819	1239
chr7-45621417-45621877	0.00312321	-0.242479	0.012	0.061	1	ENSMUST00000033100	Izumo1	ENSMUSG00000064158	protein_coding	utr	chr7-45621811-45622000	chr7-45621417-45621877	0
chr12-85192269-85193169	0.00313517	0.157016	0.223	0.194	1	ENSMUST00000004913	Pgf	ENSMUSG00000004791	protein_coding	exon	chr12-85176898-85177296	chr12-85192269-85193169	14972
chr9-44488533-44489313	0.00313595	0.142699	0.063	0.033	1	ENSMUST00000136322	C030014I23Rik	ENSMUSG00000060380	lincRNA	exon	chr9-44481545-44482180	chr9-44488533-44489313	6352
chr1-54840002-54840435	0.00314249	-0.261399	0.02	0.098	1	ENSMUST00000180327	Ankrd44	ENSMUSG00000052331	protein_coding	gap	chr1-54828696-54926139	chr1-54840002-54840435	0
chr1-170560754-170561635	0.00314443	-0.371163	0.025	0.091	1	ENSMUST00000161966	Nos1ap	ENSMUSG00000038473	protein_coding	gap	chr1-170514687-170589259	chr1-170560754-170561635	0
chr2-69860801-69862643	0.0031529	-0.203867	0.162	0.326	1	ENSMUST00000166411	Ssb	ENSMUSG00000068882	protein_coding	utr	chr2-69861562-69861739	chr2-69860801-69862643	0
chr16-21590410-21591190	0.00315316	-0.282038	0.062	0.177	1	ENSMUST00000125487	Vps8	ENSMUSG00000033653	protein_coding	gap	chr16-21581699-21640678	chr16-21590410-21591190	0
chr2-118766463-118766877	0.00316433	-0.302504	0.023	0.096	1	ENSMUST00000059997	A430105I19Rik	ENSMUSG00000045838	protein_coding	exon	chr2-118762506-118762661	chr2-118766463-118766877	3801
chr15-78832210-78833133	0.00317657	-0.269938	0.15	0.295	1	ENSMUST00000059619	Cdc42ep1	ENSMUSG00000049521	protein_coding	exon	chr15-78842647-78842725	chr15-78832210-78833133	9513
chr19-53329011-53330411	0.0031801	-0.1841	0.257	0.414	1	ENSMUST00000025998	Mxi1	ENSMUSG00000025025	protein_coding	cds	chr19-53329648-53329720	chr19-53329011-53330411	0
chr17-27934814-27935899	0.00318798	-0.23998	0.035	0.152	1	ENSMUST00000114842	Anks1	ENSMUSG00000024219	protein_coding	gap	chr17-27909647-27974904	chr17-27934814-27935899	0
chr11-100690461-100690777	0.00320194	0.213216	0.052	0.023	1	ENSMUST00000153494	Zfp385c	ENSMUSG00000014198	protein_coding	gap	chr11-100657627-100692400	chr11-100690461-100690777	0
chr12-79600030-79600736	0.00320914	0.123766	0.127	0.109	1	ENSMUST00000079533	Rad51b	ENSMUSG00000059060	protein_coding	utr	chr12-79507730-79508656	chr12-79600030-79600736	91373
chr15-97593676-97594291	0.00323639	-0.392302	0.035	0.111	1	ENSMUST00000023104	Rpap3	ENSMUSG00000022466	protein_coding	utr	chr15-97675105-97675293	chr15-97593676-97594291	80813
chr8-71709409-71710227	0.00324749	0.123846	0.09	0.076	1	ENSMUST00000146100	Fcho1	ENSMUSG00000070000	protein_coding	cds	chr8-71709994-71710126	chr8-71709409-71710227	0
chr6-88860762-88861307	0.00324852	0.117469	0.058	0.045	1	ENSMUST00000145944	Podxl2	ENSMUSG00000033152	protein_coding	gap	chr6-88849989-88865016	chr6-88860762-88861307	0
chr8-23166277-23167865	0.00325146	-0.302596	0.115	0.235	1	ENSMUST00000167004	Agpat6	ENSMUSG00000031545	protein_coding	utr	chr8-23172946-23174551	chr8-23166277-23167865	5080
chr13-51298950-51299681	0.00325751	-0.304341	0.028	0.098	1	ENSMUST00000091708	Hist1h2al	ENSMUSG00000091383	protein_coding	exon	chr13-51202688-51203065	chr13-51298950-51299681	95884
chr6-92942906-92943863	0.00327167	-0.300865	0.113	0.242	1	ENSMUST00000113438	Adamts9	ENSMUSG00000030022	protein_coding	cds	chr6-92943041-92943155	chr6-92942906-92943863	0
chr17-13682210-13684206	0.00327186	-0.196759	0.283	0.444	1	ENSMUST00000150889	Gm16046	ENSMUSG00000085705	processed_transcript	gap	chr17-13680185-13683177	chr17-13682210-13684206	0
chr15-89475494-89476913	0.00327543	-0.219929	0.228	0.384	1	ENSMUST00000165199	Arsa	ENSMUSG00000022620	protein_coding	cds	chr15-89475508-89475722	chr15-89475494-89476913	0
chr6-37430556-37432058	0.00328578	-0.312589	0.127	0.253	1	ENSMUST00000041093	Creb3l2	ENSMUSG00000038648	protein_coding	gap	chr6-37380029-37441698	chr6-37430556-37432058	0
chr17-47149702-47149978	0.00330521	-0.312033	0.012	0.061	1	ENSMUST00000191153	Trerf1	ENSMUSG00000064043	processed_transcript	gap	chr17-47141910-47230229	chr17-47149702-47149978	0
chr12-57179429-57180152	0.0033276	0.22876	0.07	0.035	1	ENSMUST00000044634	Slc25a21	ENSMUSG00000035472	protein_coding	gap	chr12-56928314-57196872	chr12-57179429-57180152	0
chr1-182124158-182125417	0.0033335	-0.182382	0.275	0.439	1	ENSMUST00000111018	Srp9	ENSMUSG00000026511	protein_coding	cds	chr1-182124904-182124975	chr1-182124158-182125417	0
chr17-86292807-86293753	0.00335038	-0.264639	0.125	0.265	1	ENSMUST00000097275	Prkce	ENSMUSG00000045038	protein_coding	gap	chr17-86168941-86353554	chr17-86292807-86293753	0
chr17-12415095-12416797	0.00337402	0.141179	0.095	0.066	1	ENSMUST00000014578	Plg	ENSMUSG00000059481	protein_coding	gap	chr17-12414285-12418636	chr17-12415095-12416797	0
chr1-73987407-73988308	0.00339594	-0.267888	0.22	0.356	1	ENSMUST00000191104	Tns1	ENSMUSG00000055322	protein_coding	gap	chr1-73986376-73990310	chr1-73987407-73988308	0
chr2-148184719-148185255	0.00339686	-0.293717	0.03	0.091	1	ENSMUST00000047315	Foxa2	ENSMUSG00000037025	protein_coding	exon	chr2-148046860-148046969	chr2-148184719-148185255	137749
chr10-95191638-95192333	0.00339693	-0.276536	0.073	0.192	1	ENSMUST00000053594	Cradd	ENSMUSG00000045867	protein_coding	gap	chr10-95175979-95322585	chr10-95191638-95192333	0
chr1-151040254-151041395	0.00340383	-0.289417	0.043	0.141	1	ENSMUST00000191173	Gm29188	ENSMUSG00000099622	lincRNA	exon	chr1-151003922-151004577	chr1-151040254-151041395	35676
chr4-55532123-55533478	0.00341383	-0.125297	0.507	0.654	1	ENSMUST00000132746	Klf4	ENSMUSG00000003032	protein_coding	utr	chr4-55531867-55532453	chr4-55532123-55533478	0
chr16-91936354-91936734	0.00341549	-0.173425	0.013	0.071	1	ENSMUST00000141344	D430001F17Rik	ENSMUSG00000087190	processed_transcript	gap	chr16-91931744-91961008	chr16-91936354-91936734	0
chr6-51641832-51642386	0.00342098	-0.303485	0.027	0.096	1	ENSMUST00000049152	Snx10	ENSMUSG00000038301	protein_coding	utr	chr6-51588963-51590679	chr6-51641832-51642386	51152
chr3-101524471-101524812	0.00342435	-0.356965	0.022	0.081	1	ENSMUST00000036493	Atp1a1	ENSMUSG00000033161	protein_coding	utr	chr3-101576219-101576555	chr3-101524471-101524812	51406
chr14-64884620-64885266	0.00343016	-0.261989	0.03	0.106	1	ENSMUST00000177326	Hmbox1	ENSMUSG00000021972	protein_coding	gap	chr14-64861627-64887574	chr14-64884620-64885266	0
chr2-72056360-72056867	0.00343444	-0.353023	0.022	0.088	1	ENSMUST00000150234	Rapgef4	ENSMUSG00000049044	protein_coding	gap	chr2-72045249-72137241	chr2-72056360-72056867	0
chr11-57615142-57615629	0.00343587	-0.319371	0.017	0.081	1	ENSMUST00000066987	Galnt10	ENSMUSG00000020520	protein_coding	exon	chr11-57645442-57645717	chr11-57615142-57615629	29812
chr1-132367428-132368230	0.00345195	-0.274846	0.085	0.194	1	ENSMUST00000142609	Tmcc2	ENSMUSG00000042066	protein_coding	cds	chr1-132367698-132367724	chr1-132367428-132368230	0
chr15-73746389-73746597	0.0034648	-0.233032	0.015	0.068	1	ENSMUST00000167582	Ptp4a3	ENSMUSG00000059895	protein_coding	gap	chr15-73723516-73753755	chr15-73746389-73746597	0
chr5-73547909-73548617	0.00346502	-0.184892	0.015	0.051	1	ENSMUST00000130087	Dcun1d4	ENSMUSG00000051674	protein_coding	gap	chr5-73534698-73555358	chr5-73547909-73548617	0
chr3-57294495-57295602	0.00346743	-0.339686	0.112	0.227	1	ENSMUST00000171384	Tm4sf1	ENSMUSG00000027800	protein_coding	cds	chr3-57294612-57294788	chr3-57294495-57295602	0
chr8-24573026-24573555	0.00348499	-0.386456	0.1	0.215	1	ENSMUST00000121992	Ido2	ENSMUSG00000031549	protein_coding	gap	chr8-24558244-24576149	chr8-24573026-24573555	0
chr1-184860274-184860563	0.00348502	-0.352623	0.028	0.083	1	ENSMUST00000048308	C130074G19Rik	ENSMUSG00000039349	protein_coding	utr	chr1-184871926-184874307	chr1-184860274-184860563	11362
chr2-148338141-148338752	0.0034992	-0.336717	0.063	0.149	1	ENSMUST00000109962	Sstr4	ENSMUSG00000037014	protein_coding	exon	chr2-148395344-148396767	chr2-148338141-148338752	56591
chr5-134797553-134798360	0.003507	-0.31957	0.05	0.141	1	ENSMUST00000015138	Eln	ENSMUSG00000029675	protein_coding	exon	chr5-134747157-134747241	chr5-134797553-134798360	50311
chr8-41024005-41024840	0.00351846	-0.258161	0.028	0.088	1	ENSMUST00000155174	Mtus1	ENSMUSG00000045636	protein_coding	gap	chr8-41022595-41039284	chr8-41024005-41024840	0
chr9-62491158-62491425	0.00353273	-0.257425	0.02	0.073	1	ENSMUST00000173171	Coro2b	ENSMUSG00000041729	protein_coding	gap	chr9-62489442-62520371	chr9-62491158-62491425	0
chr19-56721046-56722587	0.00353299	-0.247258	0.132	0.26	1	ENSMUST00000038949	Adrb1	ENSMUSG00000035283	protein_coding	cds	chr19-56722372-56723772	chr19-56721046-56722587	0
chrX-104669894-104671470	0.00355208	0.107509	0.058	0.048	1	ENSMUST00000042070	Zdhhc15	ENSMUSG00000033906	protein_coding	cds	chrX-104670664-104670799	chrX-104669894-104671470	0
chr10-26337666-26338704	0.00355501	-0.334201	0.03	0.106	1	ENSMUST00000174766	L3mbtl3	ENSMUSG00000039089	protein_coding	cds	chr10-26337768-26337859	chr10-26337666-26338704	0
chr19-10388393-10389648	0.0035653	-0.247089	0.137	0.275	1	ENSMUST00000169121	Syt7	ENSMUSG00000024743	protein_coding	cds	chr19-10389483-10389513	chr19-10388393-10389648	0
chr6-17169960-17172319	0.00360464	-0.296482	0.19	0.346	1	ENSMUST00000125170	D830026I12Rik	ENSMUSG00000085171	lincRNA	exon	chr6-17197751-17197790	chr6-17169960-17172319	25431
chr15-43678849-43679251	0.00362886	0.247582	0.133	0.088	1	ENSMUST00000022962	Emc2	ENSMUSG00000022337	protein_coding	utr	chr15-43527484-43527777	chr15-43678849-43679251	151071
chr9-71557733-71558145	0.00363624	-0.357256	0.037	0.109	1	ENSMUST00000169573	Myzap	ENSMUSG00000041361	protein_coding	gap	chr9-71555738-71558847	chr9-71557733-71558145	0
chr12-21144686-21145284	0.00364263	-0.350745	0.042	0.121	1	ENSMUST00000174530	Gm21989	ENSMUSG00000090370	processed_transcript	gap	chr12-21085786-21168203	chr12-21144686-21145284	0
chrX-20059060-20061011	0.0036478	-0.253715	0.082	0.197	1	ENSMUST00000044138	Chst7	ENSMUSG00000037347	protein_coding	cds	chrX-20059716-20061170	chrX-20059060-20061011	0
chr1-184858278-184858574	0.00366153	-0.366643	0.032	0.098	1	ENSMUST00000161821	Marc2	ENSMUSG00000073481	protein_coding	exon	chr1-184846343-184846451	chr1-184858278-184858574	11826
chr1-133399997-133400700	0.00367557	-0.371749	0.083	0.199	1	ENSMUST00000153799	Sox13	ENSMUSG00000070643	protein_coding	gap	chr1-133393272-133423875	chr1-133399997-133400700	0
chr7-34291026-34291719	0.00368314	-0.315528	0.04	0.111	1	ENSMUST00000146025	4931406P16Rik	ENSMUSG00000066571	protein_coding	gap	chr7-34285954-34305387	chr7-34291026-34291719	0
chr5-111139250-111140003	0.00369512	-0.364937	0.085	0.205	1	ENSMUST00000156290	Ttc28	ENSMUSG00000033209	protein_coding	gap	chr5-111102101-111182923	chr5-111139250-111140003	0
chr10-21677342-21679464	0.00369907	-0.281227	0.082	0.192	1	ENSMUST00000187019	Gm5420	ENSMUSG00000056716	lincRNA	exon	chr10-21686411-21686503	chr10-21677342-21679464	6946
chr18-61107443-61109024	0.00370375	0.129469	0.193	0.189	1	ENSMUST00000115268	Csf1r	ENSMUSG00000024621	protein_coding	gap	chr18-61105999-61109615	chr18-61107443-61109024	0
chr16-94369690-94371937	0.00370586	0.100905	0.41	0.432	1	ENSMUST00000155692	Ttc3	ENSMUSG00000040785	protein_coding	cds	chr16-94370926-94370971	chr16-94369690-94371937	0
chr8-83768354-83768941	0.00372637	-0.285861	0.068	0.174	1	ENSMUST00000002964	Cd97	ENSMUSG00000002885	protein_coding	exon	chr8-83741107-83741326	chr8-83768354-83768941	27027
chr3-69598079-69599488	0.00373775	-0.209116	0.022	0.081	1	ENSMUST00000061826	B3galnt1	ENSMUSG00000043300	protein_coding	utr	chr3-69598802-69598960	chr3-69598079-69599488	0
chr11-80351674-80352158	0.00373924	0.124583	0.058	0.033	1	ENSMUST00000157016	Rhbdl3	ENSMUSG00000017692	protein_coding	gap	chr11-80346884-80353411	chr11-80351674-80352158	0
chr15-96284783-96288468	0.00374925	-0.162794	0.403	0.54	1	ENSMUST00000134985	Arid2	ENSMUSG00000033237	protein_coding	cds	chr15-96287894-96287987	chr15-96284783-96288468	0
chr3-84848621-84849150	0.00376437	-0.248229	0.037	0.104	1	ENSMUST00000154148	RP24-559D1.1	ENSMUSG00000102805	protein_coding	gap	chr3-84540623-85785217	chr3-84848621-84849150	0
chr7-113172240-113172796	0.00378155	0.226038	0.088	0.053	1	ENSMUST00000047321	Arntl	ENSMUSG00000055116	protein_coding	exon	chr7-113207465-113207644	chr7-113172240-113172796	34668
chr18-68098474-68098864	0.00379232	-0.372571	0.053	0.144	1	ENSMUST00000063775	Ldlrad4	ENSMUSG00000024544	protein_coding	gap	chr18-68064687-68106550	chr18-68098474-68098864	0
chr7-17057971-17059622	0.00380367	-0.194376	0.152	0.311	1	ENSMUST00000153833	Hif3a	ENSMUSG00000004328	protein_coding	gap	chr7-17056451-17062355	chr7-17057971-17059622	0
chr3-90540777-90541317	0.00381784	-0.387337	0.095	0.202	1	ENSMUST00000107333	S100a16	ENSMUSG00000074457	protein_coding	utr	chr3-90541146-90541190	chr3-90540777-90541317	0
chr6-49366767-49368142	0.00383041	-0.175122	0.247	0.391	1	ENSMUST00000121903	Fam221a	ENSMUSG00000047115	protein_coding	cds	chr6-49367909-49367973	chr6-49366767-49368142	0
chr13-54190048-54190249	0.00383456	0.110512	0.053	0.043	1	ENSMUST00000038101	Hrh2	ENSMUSG00000034987	protein_coding	exon	chr13-54192129-54192193	chr13-54190048-54190249	1879
chr2-167574670-167575241	0.00383563	0.152865	0.14	0.119	1	ENSMUST00000127006	Gm11476	ENSMUSG00000085596	processed_transcript	gap	chr2-167558451-167604635	chr2-167574670-167575241	0
chr2-29582130-29582747	0.00384177	0.101216	0.058	0.048	1	ENSMUST00000095087	Rapgef1	ENSMUSG00000039844	protein_coding	exon	chr2-29619720-29620063	chr2-29582130-29582747	36972
chr10-4105573-4106506	0.00384572	-0.312349	0.057	0.136	1	ENSMUST00000120585	Mthfd1l	ENSMUSG00000040675	protein_coding	cds	chr10-4106377-4106529	chr10-4105573-4106506	0
chr3-116148693-116148932	0.00384655	-0.264848	0.013	0.056	1	ENSMUST00000181404	Gm26544	ENSMUSG00000097362	lincRNA	exon	chr3-116150479-116150788	chr3-116148693-116148932	1546
chr12-8884770-8885532	0.00386484	-0.255458	0.033	0.091	1	ENSMUST00000151816	9930038B18Rik	ENSMUSG00000042976	lincRNA	exon	chr12-8877321-8877459	chr12-8884770-8885532	7310
chr9-37400567-37400881	0.00387023	-0.393016	0.028	0.098	1	ENSMUST00000115048	Robo4	ENSMUSG00000032125	protein_coding	exon	chr9-37401897-37402151	chr9-37400567-37400881	1015
chr17-46115370-46115814	0.0038992	-0.325802	0.038	0.116	1	ENSMUST00000131943	Mrps18a	ENSMUSG00000023967	protein_coding	gap	chr17-46111130-46117939	chr17-46115370-46115814	0
chr7-46738915-46739582	0.00390278	-0.210473	0.008	0.053	1	ENSMUST00000128088	Saa1	ENSMUSG00000074115	protein_coding	utr	chr7-46740501-46740703	chr7-46738915-46739582	918
chr6-51611566-51613017	0.00395121	-0.229345	0.058	0.146	1	ENSMUST00000049152	Snx10	ENSMUSG00000038301	protein_coding	utr	chr6-51588963-51590679	chr6-51611566-51613017	20886
chr7-84210927-84212471	0.00395399	-0.312991	0.062	0.157	1	ENSMUST00000180424	Gm26708	ENSMUSG00000097016	lincRNA	exon	chr7-84194020-84194973	chr7-84210927-84212471	15953
chr9-108263087-108264602	0.00396599	0.107879	0.418	0.427	1	ENSMUST00000195429	Dag1	ENSMUSG00000039952	protein_coding	utr	chr9-108263625-108263751	chr9-108263087-108264602	0
chr6-88202929-88203620	0.00399871	0.162112	0.217	0.197	1	ENSMUST00000170089	Gata2	ENSMUSG00000015053	protein_coding	gap	chr6-88202565-88204582	chr6-88202929-88203620	0
chr8-11259777-11260145	0.00403932	-0.310625	0.027	0.098	1	ENSMUST00000033898	Col4a1	ENSMUSG00000031502	protein_coding	gap	chr8-11247096-11267596	chr8-11259777-11260145	0
chr12-103388057-103389262	0.0040514	-0.223909	0.17	0.323	1	ENSMUST00000148371	Otub2	ENSMUSG00000021203	protein_coding	cds	chr12-103388985-103389108	chr12-103388057-103389262	0
chr7-132714195-132714604	0.00405206	0.170682	0.065	0.028	1	ENSMUST00000106169	Fam53b	ENSMUSG00000030956	protein_coding	utr	chr7-132712806-132715642	chr7-132714195-132714604	0
chr7-84150719-84152569	0.00405699	-0.187043	0.237	0.404	1	ENSMUST00000117085	Abhd17c	ENSMUSG00000038459	protein_coding	cds	chr7-84151282-84151844	chr7-84150719-84152569	0
chr9-121058027-121058824	0.00408535	-0.418476	0.06	0.157	1	ENSMUST00000171923	Ulk4	ENSMUSG00000040936	protein_coding	gap	chr9-121044872-121073917	chr9-121058027-121058824	0
chr4-32387393-32388930	0.00409948	-0.229093	0.062	0.167	1	ENSMUST00000149201	Bach2	ENSMUSG00000040270	protein_coding	gap	chr4-32317305-32417434	chr4-32387393-32388930	0
chr12-21204739-21205242	0.00410106	-0.311036	0.052	0.124	1	ENSMUST00000101562	Asap2	ENSMUSG00000052632	protein_coding	gap	chr12-21204090-21206302	chr12-21204739-21205242	0
chr5-136565226-136568265	0.0041078	-0.19393	0.18	0.336	1	ENSMUST00000177297	Cux1	ENSMUSG00000029705	protein_coding	cds	chr5-136567178-136567240	chr5-136565226-136568265	0
chr3-79252444-79253740	0.00410905	-0.21477	0.065	0.167	1	ENSMUST00000195708	Rapgef2	ENSMUSG00000062232	protein_coding	gap	chr3-79215028-79286463	chr3-79252444-79253740	0
chr11-109559234-109559760	0.00411478	-0.243005	0.017	0.081	1	ENSMUST00000106697	Arsg	ENSMUSG00000020604	protein_coding	gap	chr11-109558072-109563181	chr11-109559234-109559760	0
chr2-124927919-124928757	0.00411972	-0.194311	0.01	0.053	1	ENSMUST00000070353	Slc24a5	ENSMUSG00000035183	protein_coding	exon	chr2-125068124-125068301	chr2-124927919-124928757	139366
chr11-52094591-52094841	0.00413832	0.217546	0.092	0.061	1	ENSMUST00000181262	Gm26551	ENSMUSG00000097219	lincRNA	gap	chr11-51949917-52120691	chr11-52094591-52094841	0
chr2-4586227-4586689	0.00414391	-0.360453	0.03	0.104	1	ENSMUST00000177457	Frmd4a	ENSMUSG00000026657	protein_coding	cds	chr2-4586361-4586494	chr2-4586227-4586689	0
chr5-136970451-136971106	0.00416209	0.137226	0.085	0.071	1	ENSMUST00000111093	Cldn15	ENSMUSG00000001739	protein_coding	gap	chr5-136968324-136972319	chr5-136970451-136971106	0
chr9-40841154-40841609	0.0041635	-0.240413	0.008	0.053	1	ENSMUST00000067375	Bsx	ENSMUSG00000054360	protein_coding	exon	chr9-40874127-40874439	chr9-40841154-40841609	32517
chr19-6300411-6300631	0.0041762	-0.343888	0.078	0.174	1	ENSMUST00000025684	Ehd1	ENSMUSG00000024772	protein_coding	utr	chr19-6298599-6300096	chr19-6300411-6300631	314
chrX-75873640-75875384	0.00419743	-0.254678	0.072	0.159	1	ENSMUST00000114059	Pls3	ENSMUSG00000016382	protein_coding	utr	chrX-75875048-75875182	chrX-75873640-75875384	0
chr13-43350687-43351027	0.00419863	-0.314295	0.017	0.068	1	ENSMUST00000066804	Sirt5	ENSMUSG00000054021	protein_coding	exon	chr13-43370710-43370868	chr13-43350687-43351027	19682
chr2-158248088-158248768	0.00420712	-0.299227	0.04	0.114	1	ENSMUST00000065039	Bpi	ENSMUSG00000052922	protein_coding	exon	chr2-158258094-158258424	chr2-158248088-158248768	9325
chr12-102876943-102878886	0.00420902	-0.188098	0.302	0.46	1	ENSMUST00000045652	Btbd7	ENSMUSG00000041702	protein_coding	utr	chr12-102878216-102878406	chr12-102876943-102878886	0
chr17-43395413-43396130	0.0042154	-0.367912	0.075	0.184	1	ENSMUST00000113599	Gpr116	ENSMUSG00000056492	protein_coding	gap	chr17-43389708-43403917	chr17-43395413-43396130	0
chr12-70880349-70880924	0.00421825	0.220717	0.072	0.04	1	ENSMUST00000057859	Frmd6	ENSMUSG00000048285	protein_coding	cds	chr12-70880619-70880805	chr12-70880349-70880924	0
chr6-142451355-142451801	0.00422136	0.234895	0.057	0.023	1	ENSMUST00000032371	Gys2	ENSMUSG00000030244	protein_coding	cds	chr6-142451534-142451640	chr6-142451355-142451801	0
chr1-126461582-126462303	0.00422582	-0.365018	0.043	0.124	1	ENSMUST00000162877	Nckap5	ENSMUSG00000049690	protein_coding	gap	chr1-126448518-126492547	chr1-126461582-126462303	0
chr17-78241191-78241573	0.00424457	-0.323194	0.018	0.086	1	ENSMUST00000112498	Crim1	ENSMUSG00000024074	protein_coding	gap	chr17-78237916-78279972	chr17-78241191-78241573	0
chr7-130273041-130273809	0.00427255	-0.19356	0.022	0.078	1	ENSMUST00000124096	Fgfr2	ENSMUSG00000030849	protein_coding	gap	chr7-130172940-133081756	chr7-130273041-130273809	0
chr3-103789805-103791690	0.00432848	-0.195095	0.167	0.338	1	ENSMUST00000137078	Hipk1	ENSMUSG00000008730	protein_coding	utr	chr3-103791393-103791561	chr3-103789805-103791690	0
chr8-110938599-110939649	0.00432973	-0.243404	0.102	0.225	1	ENSMUST00000180679	Gm26816	ENSMUSG00000097380	lincRNA	gap	chr8-110865652-110940289	chr8-110938599-110939649	0
chr1-52499516-52501060	0.00433697	-0.18606	0.212	0.364	1	ENSMUST00000186764	Nab1	ENSMUSG00000002881	protein_coding	utr	chr1-52500210-52500300	chr1-52499516-52501060	0
chr2-30690006-30690941	0.00434875	-0.22622	0.173	0.318	1	ENSMUST00000146702	9330198N18Rik	ENSMUSG00000086405	lincRNA	exon	chr2-30689015-30689210	chr2-30690006-30690941	795
chr12-3308660-3310633	0.00436335	-0.160876	0.365	0.5	1	ENSMUST00000021001	Rab10	ENSMUSG00000020671	protein_coding	cds	chr12-3309292-3309418	chr12-3308660-3310633	0
chr19-57211498-57212225	0.00436822	-0.347474	0.082	0.212	1	ENSMUST00000156316	Ablim1	ENSMUSG00000025085	protein_coding	gap	chr19-57173460-57314692	chr19-57211498-57212225	0
chr10-98913552-98916144	0.00438245	-0.112451	0.572	0.692	1	ENSMUST00000020107	Atp2b1	ENSMUSG00000019943	protein_coding	utr	chr10-98915152-98915371	chr10-98913552-98916144	0
chr2-148170762-148172047	0.00441074	-0.359417	0.108	0.222	1	ENSMUST00000047315	Foxa2	ENSMUSG00000037025	protein_coding	exon	chr2-148046860-148046969	chr2-148170762-148172047	123792
chr5-146832381-146833497	0.00441716	-0.199128	0.175	0.328	1	ENSMUST00000099272	Rpl21	ENSMUSG00000041453	protein_coding	utr	chr5-146833202-146833740	chr5-146832381-146833497	0
chr7-118922260-118922850	0.00442306	0.223626	0.148	0.104	1	ENSMUST00000152136	Iqck	ENSMUSG00000073856	protein_coding	gap	chr7-118915596-118941584	chr7-118922260-118922850	0
chr9-62536278-62537738	0.00444939	-0.285963	0.058	0.167	1	ENSMUST00000048043	Coro2b	ENSMUSG00000041729	protein_coding	cds	chr9-62536653-62536667	chr9-62536278-62537738	0
chr13-102877077-102877484	0.00445614	0.106168	0.057	0.051	1	ENSMUST00000194446	Mast4	ENSMUSG00000034751	protein_coding	gap	chr13-102853920-103007204	chr13-102877077-102877484	0
chr9-119936897-119938003	0.00447951	-0.20592	0.132	0.278	1	ENSMUST00000035100	Ttc21a	ENSMUSG00000032514	protein_coding	cds	chr9-119937724-119937750	chr9-119936897-119938003	0
chr9-96432526-96432865	0.00448024	-0.264478	0.01	0.058	1	ENSMUST00000185694	BC043934	ENSMUSG00000056418	lincRNA	exon	chr9-96435783-96438138	chr9-96432526-96432865	2917
chr11-4251246-4251881	0.00448102	0.134174	0.063	0.038	1	ENSMUST00000066283	Lif	ENSMUSG00000034394	protein_coding	exon	chr11-4257557-4257688	chr11-4251246-4251881	5675
chr17-26385220-26385566	0.00449383	-0.306855	0.025	0.081	1	ENSMUST00000182897	Neurl1b	ENSMUSG00000034413	protein_coding	exon	chr17-26414829-26414995	chr17-26385220-26385566	29262
chr10-121585713-121587683	0.0044962	-0.201855	0.232	0.399	1	ENSMUST00000039810	Xpot	ENSMUSG00000034667	protein_coding	utr	chr10-121587380-121590193	chr10-121585713-121587683	0
chr10-79788252-79789108	0.00450286	0.113473	0.058	0.045	1	ENSMUST00000169684	Prss57	ENSMUSG00000020323	protein_coding	cds	chr10-79788843-79788942	chr10-79788252-79789108	0
chr1-82150685-82151180	0.00450517	-0.263855	0.027	0.088	1	ENSMUST00000069799	Irs1	ENSMUSG00000055980	protein_coding	utr	chr1-82233101-82237604	chr1-82150685-82151180	81920
chr15-75703361-75704769	0.00452348	0.119927	0.152	0.146	1	ENSMUST00000149407	Rhpn1	ENSMUSG00000022580	protein_coding	cds	chr15-75704394-75704474	chr15-75703361-75704769	0
chr15-78982277-78984271	0.00453237	0.13595	0.538	0.535	1	ENSMUST00000130663	Triobp	ENSMUSG00000033088	protein_coding	cds	chr15-78983203-78983208	chr15-78982277-78984271	0
chr17-13656661-13657153	0.00454022	-0.318764	0.063	0.146	1	ENSMUST00000185626	Tcte2	ENSMUSG00000038347	protein_coding	gap	chr17-13568884-13668758	chr17-13656661-13657153	0
chr5-53902793-53903107	0.00454394	-0.297782	0.007	0.053	1	ENSMUST00000037337	Tbc1d19	ENSMUSG00000039178	protein_coding	gap	chr5-53901648-53903331	chr5-53902793-53903107	0
chr12-75369167-75369916	0.00454562	-0.205582	0.028	0.081	1	ENSMUST00000172981	Rhoj	ENSMUSG00000046768	protein_coding	gap	chr12-75309002-75391678	chr12-75369167-75369916	0
chr17-15234887-15235338	0.00455546	-0.35515	0.02	0.088	1	ENSMUST00000181658	Gm5091	ENSMUSG00000097624	lincRNA	gap	chr17-15234003-15240269	chr17-15234887-15235338	0
chr9-78480365-78482346	0.00456324	-0.152779	0.423	0.573	1	ENSMUST00000156988	Eef1a1	ENSMUSG00000037742	protein_coding	cds	chr9-78480511-78480654	chr9-78480365-78482346	0
chr1-75187897-75188250	0.00459211	-0.154089	0.013	0.083	1	ENSMUST00000189820	Atg9a	ENSMUSG00000033124	protein_coding	cds	chr1-75187945-75188106	chr1-75187897-75188250	0
chr2-112265215-112266565	0.00459668	-0.195099	0.215	0.379	1	ENSMUST00000141047	Gm21985	ENSMUSG00000096764	protein_coding	utr	chr2-112266314-112266821	chr2-112265215-112266565	0
chr12-80103254-80104094	0.00460125	0.160813	0.173	0.109	1	ENSMUST00000021552	Zfp36l1	ENSMUSG00000021127	protein_coding	utr	chr12-80107760-80109588	chr12-80103254-80104094	3665
chr4-148806651-148807096	0.00461147	-0.275393	0.025	0.083	1	ENSMUST00000128881	Casz1	ENSMUSG00000028977	protein_coding	gap	chr4-148804515-148838265	chr4-148806651-148807096	0
chr9-90197930-90199212	0.00463102	0.163921	0.183	0.167	1	ENSMUST00000167122	Adamts7	ENSMUSG00000032363	protein_coding	gap	chr9-90197163-90207716	chr9-90197930-90199212	0
chr7-110859967-110860497	0.00463832	-0.261073	0.032	0.109	1	ENSMUST00000033050	Lyve1	ENSMUSG00000030787	protein_coding	gap	chr7-110859759-110862783	chr7-110859967-110860497	0
chr18-61526455-61527132	0.00463961	-0.335234	0.067	0.157	1	ENSMUST00000171629	Arhgef37	ENSMUSG00000045094	protein_coding	gap	chr18-61524004-61536390	chr18-61526455-61527132	0
chr18-38255689-38256069	0.00464443	-0.366872	0.033	0.104	1	ENSMUST00000025314	0610009O20Rik	ENSMUSG00000024442	protein_coding	gap	chr18-38254567-38257257	chr18-38255689-38256069	0
chr19-40394553-40395604	0.00465457	-0.355979	0.092	0.205	1	ENSMUST00000165469	Sorbs1	ENSMUSG00000025006	protein_coding	gap	chr19-40393517-40395678	chr19-40394553-40395604	0
chr10-95939797-95942188	0.00466872	-0.164193	0.373	0.515	1	ENSMUST00000053484	Eea1	ENSMUSG00000036499	protein_coding	cds	chr10-95940949-95940972	chr10-95939797-95942188	0
chr12-12941454-12942781	0.00467501	-0.234579	0.107	0.237	1	ENSMUST00000043396	Mycn	ENSMUSG00000037169	protein_coding	utr	chr12-12941636-12941914	chr12-12941454-12942781	0
chr7-31149766-31151857	0.00468037	-0.187926	0.262	0.409	1	ENSMUST00000186634	Gramd1a	ENSMUSG00000001248	protein_coding	cds	chr7-31150896-31150903	chr7-31149766-31151857	0
chr14-20103174-20103599	0.00468566	-0.329745	0.015	0.071	1	ENSMUST00000059666	Saysd1	ENSMUSG00000045107	protein_coding	exon	chr14-20082878-20083172	chr14-20103174-20103599	20001
chr19-21833285-21834000	0.00469583	-0.269946	0.013	0.071	1	ENSMUST00000096194	Tmem2	ENSMUSG00000024754	protein_coding	gap	chr19-21832243-21835417	chr19-21833285-21834000	0
chr5-53997938-53999641	0.00470145	-0.160996	0.33	0.485	1	ENSMUST00000117661	Stim2	ENSMUSG00000039156	protein_coding	cds	chr5-53998884-53999034	chr5-53997938-53999641	0
chr17-6054854-6055422	0.00470807	0.12467	0.055	0.04	1	ENSMUST00000097432	Serac1	ENSMUSG00000015659	protein_coding	gap	chr17-6051832-6056606	chr17-6054854-6055422	0
chr19-3985939-3986722	0.00470994	0.168665	0.137	0.111	1	ENSMUST00000054030	Acy3	ENSMUSG00000024866	protein_coding	utr	chr19-3986661-3987069	chr19-3985939-3986722	0
chr13-113514957-113515642	0.00472287	-0.24166	0.02	0.078	1	ENSMUST00000109241	Snx18	ENSMUSG00000042364	protein_coding	utr	chr13-113592180-113594608	chr13-113514957-113515642	76537
chr19-29250864-29253103	0.00474667	-0.153312	0.372	0.525	1	ENSMUST00000065796	Jak2	ENSMUSG00000024789	protein_coding	utr	chr19-29252437-29252519	chr19-29250864-29253103	0
chr19-40698111-40698833	0.00478212	-0.401213	0.067	0.167	1	ENSMUST00000156598	Entpd1	ENSMUSG00000048120	protein_coding	gap	chr19-40659901-40711162	chr19-40698111-40698833	0
chr17-5940737-5942092	0.00479105	-0.205869	0.092	0.23	1	ENSMUST00000146009	Synj2	ENSMUSG00000023805	protein_coding	cds	chr17-5941451-5941577	chr17-5940737-5942092	0
chr18-38799634-38800008	0.00479757	-0.342844	0.013	0.073	1	ENSMUST00000148850	Arhgap26	ENSMUSG00000036452	protein_coding	gap	chr18-38676806-38933792	chr18-38799634-38800008	0
chr1-74771241-74773537	0.00480515	-0.177739	0.035	0.139	1	ENSMUST00000006716	Wnt6	ENSMUSG00000033227	protein_coding	cds	chr1-74772146-74772222	chr1-74771241-74773537	0
chr19-6553646-6554520	0.00481441	0.195844	0.112	0.083	1	ENSMUST00000113459	Nrxn2	ENSMUSG00000033768	protein_coding	utr	chr19-6542391-6544169	chr19-6553646-6554520	9476
chr8-13190187-13190647	0.00482742	-0.322802	0.025	0.088	1	ENSMUST00000165605	Grtp1	ENSMUSG00000038515	protein_coding	gap	chr8-13189748-13192049	chr8-13190187-13190647	0
chr5-139017439-139018099	0.00482944	0.10908	0.115	0.106	1	ENSMUST00000110890	Prkar1b	ENSMUSG00000025855	protein_coding	utr	chr5-139017308-139018658	chr5-139017439-139018099	0
chr14-24747561-24748632	0.00483542	-0.296742	0.132	0.255	1	ENSMUST00000159562	4930428N03Rik	ENSMUSG00000089887	lincRNA	exon	chr14-24628609-24629200	chr14-24747561-24748632	118360
chr3-108767392-108767708	0.0048539	0.108289	0.058	0.045	1	ENSMUST00000147916	Aknad1	ENSMUSG00000049565	protein_coding	gap	chr3-108760630-108771909	chr3-108767392-108767708	0
chr4-101121879-101122294	0.00486757	-0.242141	0.01	0.051	1	ENSMUST00000106955	Raver2	ENSMUSG00000035275	protein_coding	gap	chr4-101120580-101131263	chr4-101121879-101122294	0
chr5-65101409-65103096	0.0048691	-0.196291	0.043	0.152	1	ENSMUST00000101192	Klhl5	ENSMUSG00000054920	protein_coding	exon	chr5-65107568-65107861	chr5-65101409-65103096	4471
chrX-48105976-48106715	0.00487214	-0.229099	0.02	0.086	1	ENSMUST00000077775	Xpnpep2	ENSMUSG00000037005	protein_coding	exon	chrX-48108725-48109194	chrX-48105976-48106715	2009
chr9-48723130-48724168	0.00490353	-0.227129	0.112	0.23	1	ENSMUST00000093852	Zbtb16	ENSMUSG00000066687	protein_coding	gap	chr9-48717370-48743463	chr9-48723130-48724168	0
chr19-24797335-24797938	0.00490478	0.18772	0.087	0.061	1	ENSMUST00000047666	Pgm5	ENSMUSG00000041731	protein_coding	gap	chr19-24750481-24815657	chr19-24797335-24797938	0
chr14-54463084-54465000	0.00492948	-0.184932	0.198	0.369	1	ENSMUST00000022782	Lrp10	ENSMUSG00000022175	protein_coding	cds	chr14-54464904-54464948	chr14-54463084-54465000	0
chr12-79035123-79035684	0.0049431	-0.389672	0.033	0.106	1	ENSMUST00000039928	Plekhh1	ENSMUSG00000060716	protein_coding	gap	chr12-79029421-79040491	chr12-79035123-79035684	0
chr12-46402589-46402807	0.00498592	0.145098	0.055	0.028	1	ENSMUST00000021438	Nova1	ENSMUSG00000021047	protein_coding	utr	chr12-46694517-46699968	chr12-46402589-46402807	291709
chr13-113614654-113615991	0.00498681	-0.170184	0.068	0.174	1	ENSMUST00000109241	Snx18	ENSMUSG00000042364	protein_coding	gap	chr13-113594863-113616801	chr13-113614654-113615991	0
chr1-90258259-90258794	0.00499957	0.260975	0.092	0.051	1	ENSMUST00000187649	Gm28721	ENSMUSG00000101951	lincRNA	gap	chr1-90256068-90259994	chr1-90258259-90258794	0
chr5-137530558-137532054	0.00500124	-0.19643	0.21	0.371	1	ENSMUST00000150063	Gnb2	ENSMUSG00000029713	protein_coding	cds	chr5-137530695-137530751	chr5-137530558-137532054	0
chr5-92897389-92898436	0.00500921	-0.242948	0.045	0.131	1	ENSMUST00000113051	Shroom3	ENSMUSG00000029381	protein_coding	utr	chr5-92897993-92898220	chr5-92897389-92898436	0
chr12-34826752-34827329	0.00502471	-0.333646	0.028	0.091	1	ENSMUST00000061679	4921508M14Rik	ENSMUSG00000052376	protein_coding	utr	chr12-34873730-34874075	chr12-34826752-34827329	46400
chr11-105943222-105945383	0.00507283	-0.254879	0.26	0.407	1	ENSMUST00000184269	Cyb561	ENSMUSG00000019590	protein_coding	cds	chr11-105944111-105944203	chr11-105943222-105945383	0
chr15-101134035-101134879	0.00508464	-0.280745	0.167	0.311	1	ENSMUST00000144229	Acvrl1	ENSMUSG00000000530	protein_coding	cds	chr15-101134680-101134694	chr15-101134035-101134879	0
chr15-37687497-37688277	0.00509424	-0.353754	0.04	0.109	1	ENSMUST00000168992	Ncald	ENSMUSG00000051359	protein_coding	gap	chr15-37661087-37791895	chr15-37687497-37688277	0
chr16-33581514-33582145	0.00509929	-0.211768	0.04	0.109	1	ENSMUST00000122427	Slc12a8	ENSMUSG00000035506	protein_coding	gap	chr16-33551115-33590251	chr16-33581514-33582145	0
chr10-61534424-61535083	0.00511872	-0.293703	0.125	0.217	1	ENSMUST00000049242	Lrrc20	ENSMUSG00000037151	protein_coding	gap	chr10-61527210-61548047	chr10-61534424-61535083	0
chr1-181014743-181015237	0.00516342	-0.209764	0.02	0.081	1	ENSMUST00000147585	Ephx1	ENSMUSG00000038776	protein_coding	gap	chr1-181001987-181020767	chr1-181014743-181015237	0
chr10-128180051-128180309	0.00517792	-0.29187	0.02	0.078	1	ENSMUST00000099139	Rbms2	ENSMUSG00000040043	protein_coding	utr	chr10-128179949-128180297	chr10-128180051-128180309	0
chr16-38304481-38305299	0.00519208	-0.28696	0.045	0.149	1	ENSMUST00000023501	Maats1	ENSMUSG00000022805	protein_coding	cds	chr16-38304779-38305000	chr16-38304481-38305299	0
chr19-40667204-40667522	0.00519817	-0.268617	0.018	0.071	1	ENSMUST00000156598	Entpd1	ENSMUSG00000048120	protein_coding	gap	chr19-40659901-40711162	chr19-40667204-40667522	0
chr6-97347067-97347296	0.00521498	0.23719	0.077	0.045	1	ENSMUST00000152385	Frmd4b	ENSMUSG00000030064	protein_coding	gap	chr6-97329565-97353181	chr6-97347067-97347296	0
chr16-21219435-21219908	0.00524745	-0.259965	0.015	0.058	1	ENSMUST00000006112	Ephb3	ENSMUSG00000005958	protein_coding	cds	chr16-21219455-21219507	chr16-21219435-21219908	0
chr4-140003396-140004718	0.00525236	-0.218952	0.018	0.073	1	ENSMUST00000039331	Igsf21	ENSMUSG00000040972	protein_coding	utr	chr4-140026846-140027004	chr4-140003396-140004718	22127
chr11-110357767-110358573	0.00527072	0.117896	0.05	0.033	1	ENSMUST00000148984	Abca5	ENSMUSG00000018800	protein_coding	exon	chr11-110337594-110337716	chr11-110357767-110358573	20050
chr7-25436147-25436996	0.00528167	-0.262259	0.062	0.169	1	ENSMUST00000074040	Cxcl17	ENSMUSG00000060188	protein_coding	exon	chr7-25412702-25412886	chr7-25436147-25436996	23260
chr1-86143946-86144897	0.00528387	0.186747	0.127	0.093	1	ENSMUST00000135197	Gm21972	ENSMUSG00000094638	protein_coding	gap	chr1-86137117-86154710	chr1-86143946-86144897	0
chr17-35820920-35822354	0.0052847	-0.220824	0.162	0.308	1	ENSMUST00000003635	Ier3	ENSMUSG00000003541	protein_coding	cds	chr17-35822038-35822310	chr17-35820920-35822354	0
chr5-67846181-67848177	0.00529316	-0.156183	0.287	0.434	1	ENSMUST00000135930	Atp8a1	ENSMUSG00000037685	protein_coding	cds	chr5-67847162-67847206	chr5-67846181-67848177	0
chr8-120473792-120474380	0.00530411	-0.346457	0.05	0.134	1	ENSMUST00000180448	Gse1	ENSMUSG00000031822	protein_coding	gap	chr8-120354180-120553583	chr8-120473792-120474380	0
chr8-3215197-3215901	0.00531711	-0.323253	0.102	0.205	1	ENSMUST00000139504	Insr	ENSMUSG00000005534	protein_coding	gap	chr8-3211701-3258382	chr8-3215197-3215901	0
chr6-114922323-114922956	0.00532194	-0.211389	0.035	0.114	1	ENSMUST00000147639	Vgll4	ENSMUSG00000030315	protein_coding	gap	chr6-114890807-114957935	chr6-114922323-114922956	0
chr13-109315046-109316171	0.00532795	-0.193042	0.017	0.063	1	ENSMUST00000177907	Pde4d	ENSMUSG00000021699	protein_coding	gap	chr13-109032698-109740386	chr13-109315046-109316171	0
chr5-122130407-122132463	0.00533676	-0.194239	0.14	0.298	1	ENSMUST00000132701	Ccdc63	ENSMUSG00000043036	protein_coding	utr	chr5-122131921-122132003	chr5-122130407-122132463	0
chr3-51224143-51225440	0.00534572	-0.199839	0.147	0.303	1	ENSMUST00000167780	Ccrn4l	ENSMUSG00000023087	protein_coding	cds	chr3-51225104-51225287	chr3-51224143-51225440	0
chr16-45966682-45966967	0.00534779	-0.276905	0.013	0.066	1	ENSMUST00000130481	Plcxd2	ENSMUSG00000087141	protein_coding	gap	chr16-45965175-45972108	chr16-45966682-45966967	0
chr8-87896209-87896822	0.00535061	0.224124	0.078	0.043	1	ENSMUST00000174764	Zfp423	ENSMUSG00000045333	protein_coding	gap	chr8-87859485-87904488	chr8-87896209-87896822	0
chr19-21077432-21078812	0.00537081	0.118971	0.065	0.048	1	ENSMUST00000039500	Tmc1	ENSMUSG00000024749	protein_coding	exon	chr19-20954144-20954202	chr19-21077432-21078812	123229
chr9-26805760-26806831	0.00539175	-0.223503	0.112	0.21	1	ENSMUST00000162702	Glb1l2	ENSMUSG00000036395	protein_coding	cds	chr9-26806298-26806383	chr9-26805760-26806831	0
chr2-38530727-38531406	0.00539512	-0.259814	0.047	0.126	1	ENSMUST00000156726	Nek6	ENSMUSG00000026749	protein_coding	gap	chr2-38514659-38550552	chr2-38530727-38531406	0
chr19-42138548-42139124	0.00543108	-0.321535	0.027	0.096	1	ENSMUST00000061111	Marveld1	ENSMUSG00000044345	protein_coding	exon	chr19-42147400-42149559	chr19-42138548-42139124	8275
chr15-97828966-97829204	0.00544387	-0.286609	0.058	0.157	1	ENSMUST00000156045	Hdac7	ENSMUSG00000022475	protein_coding	gap	chr15-97811629-97831358	chr15-97828966-97829204	0
chr9-21846593-21847300	0.00545323	-0.319816	0.21	0.348	1	ENSMUST00000034728	Dock6	ENSMUSG00000032198	protein_coding	cds	chr9-21847185-21847272	chr9-21846593-21847300	0
chr2-75801478-75802238	0.00548047	0.121716	0.05	0.03	1	ENSMUST00000135682	Gm13657	ENSMUSG00000086813	processed_transcript	exon	chr2-75780711-75782306	chr2-75801478-75802238	19171
chr1-64037064-64037320	0.00549057	-0.296455	0.022	0.076	1	ENSMUST00000114086	Klf7	ENSMUSG00000025959	protein_coding	gap	chr1-64035765-64042313	chr1-64037064-64037320	0
chr17-26548971-26549746	0.00549601	-0.345673	0.06	0.162	1	ENSMUST00000090257	Gm8225	ENSMUSG00000068604	protein_coding	cds	chr17-26543014-26543715	chr17-26548971-26549746	5255
chr8-83874656-83877409	0.00554674	-0.287302	0.09	0.207	1	ENSMUST00000181723	Gm26721	ENSMUSG00000096943	lincRNA	exon	chr8-83887079-83887557	chr8-83874656-83877409	9669
chr7-112251897-112252483	0.00557553	-0.264153	0.032	0.086	1	ENSMUST00000106648	Mical2	ENSMUSG00000038244	protein_coding	gap	chr7-112235420-112271229	chr7-112251897-112252483	0
chr18-37218026-37218539	0.00559483	-0.184962	0.013	0.051	1	ENSMUST00000194544	RP23-407E2.5	ENSMUSG00000102836	protein_coding	gap	chr18-36970138-37825020	chr18-37218026-37218539	0
chr4-120242769-120243190	0.0056531	-0.325636	0.03	0.096	1	ENSMUST00000102656	Foxo6	ENSMUSG00000052135	protein_coding	utr	chr4-120267079-120267916	chr4-120242769-120243190	23888
chr19-40647158-40647971	0.00566804	-0.231925	0.04	0.109	1	ENSMUST00000134063	Entpd1	ENSMUSG00000048120	protein_coding	gap	chr19-40612524-40711162	chr19-40647158-40647971	0
chr1-132390094-132391947	0.00567065	-0.242386	0.118	0.253	1	ENSMUST00000045473	Tmcc2	ENSMUSG00000042066	protein_coding	cds	chr1-132390977-132391183	chr1-132390094-132391947	0
chr12-112151540-112152049	0.00567475	0.245147	0.22	0.164	1	ENSMUST00000128402	Kif26a	ENSMUSG00000021294	protein_coding	gap	chr12-112146957-112157247	chr12-112151540-112152049	0
chr7-3291181-3291491	0.00568065	-0.254128	0.038	0.139	1	ENSMUST00000164553	Myadm	ENSMUSG00000068566	protein_coding	gap	chr7-3289326-3293202	chr7-3291181-3291491	0
chr19-10182100-10183852	0.00568319	-0.217147	0.143	0.298	1	ENSMUST00000010807	Fads1	ENSMUSG00000010663	protein_coding	cds	chr19-10183052-10183264	chr19-10182100-10183852	0
chr6-52842126-52843248	0.00568516	-0.145014	0.017	0.086	1	ENSMUST00000136250	Jazf1	ENSMUSG00000063568	protein_coding	gap	chr6-52812300-52893998	chr6-52842126-52843248	0
chr10-12736816-12737487	0.00569225	-0.201193	0.012	0.053	1	ENSMUST00000076817	Utrn	ENSMUSG00000019820	protein_coding	cds	chr10-12736952-12737102	chr10-12736816-12737487	0
chr18-80100786-80101657	0.005698	0.197507	0.057	0.025	1	ENSMUST00000070219	Pard6g	ENSMUSG00000056214	protein_coding	gap	chr18-80080048-80116968	chr18-80100786-80101657	0
chr14-76819226-76820170	0.00569849	-0.211751	0.042	0.101	1	ENSMUST00000189375	1700108F19Rik	ENSMUSG00000101009	processed_transcript	exon	chr14-76686728-76687169	chr14-76819226-76820170	132056
chr2-93956226-93957351	0.00570145	-0.276799	0.083	0.199	1	ENSMUST00000183110	Gm27027	ENSMUSG00000098004	protein_coding	cds	chr2-93957072-93957105	chr2-93956226-93957351	0
chr5-53948425-53949127	0.00570833	-0.376931	0.087	0.202	1	ENSMUST00000037337	Tbc1d19	ENSMUSG00000039178	protein_coding	utr	chr5-53903407-53904380	chr5-53948425-53949127	44044
chr5-150457200-150458252	0.0057217	-0.288984	0.063	0.152	1	ENSMUST00000087204	Fry	ENSMUSG00000056602	protein_coding	cds	chr5-150457745-150457915	chr5-150457200-150458252	0
chr7-28596626-28596955	0.00574662	-0.211715	0.032	0.088	1	ENSMUST00000150454	Pak4	ENSMUSG00000030602	protein_coding	gap	chr7-28569867-28598034	chr7-28596626-28596955	0
chr5-34968067-34968675	0.00574829	-0.337616	0.025	0.091	1	ENSMUST00000128161	Rgs12	ENSMUSG00000029101	protein_coding	gap	chr5-34966756-34975216	chr5-34968067-34968675	0
chr18-23872987-23873599	0.00576259	-0.192896	0.015	0.058	1	ENSMUST00000170802	Mapre2	ENSMUSG00000024277	protein_coding	gap	chr18-23858158-23877943	chr18-23872987-23873599	0
chr12-111724997-111725233	0.0057691	0.24989	0.103	0.068	1	ENSMUST00000162316	Apopt1	ENSMUSG00000037787	protein_coding	utr	chr12-111724409-111727115	chr12-111724997-111725233	0
chr12-112949931-112950778	0.00577313	-0.243315	0.193	0.343	1	ENSMUST00000181436	Gm26583	ENSMUSG00000097476	lincRNA	gap	chr12-112950025-112950490	chr12-112949931-112950778	0
chr6-128123990-128124915	0.00577345	-0.269941	0.09	0.205	1	ENSMUST00000127105	Tspan9	ENSMUSG00000030352	protein_coding	utr	chr6-128124216-128124316	chr6-128123990-128124915	0
chr4-138729618-138729817	0.00578048	0.240204	0.053	0.023	1	ENSMUST00000124660	Pla2g2c	ENSMUSG00000028750	protein_coding	gap	chr4-138725858-138731523	chr4-138729618-138729817	0
chr19-42068295-42069430	0.00578205	-0.371961	0.137	0.275	1	ENSMUST00000172244	Hoga1	ENSMUSG00000025176	protein_coding	gap	chr19-42063326-42070187	chr19-42068295-42069430	0
chr5-111247379-111248445	0.00578828	0.106102	0.065	0.051	1	ENSMUST00000156290	Ttc28	ENSMUSG00000033209	protein_coding	gap	chr5-111235642-111266534	chr5-111247379-111248445	0
chr12-70852790-70853504	0.00579228	-0.231871	0.018	0.086	1	ENSMUST00000057859	Frmd6	ENSMUSG00000048285	protein_coding	gap	chr12-70825574-70863876	chr12-70852790-70853504	0
chr2-90678298-90679716	0.0058088	-0.208037	0.13	0.265	1	ENSMUST00000057481	Nup160	ENSMUSG00000051329	protein_coding	cds	chr2-90679409-90679508	chr2-90678298-90679716	0
chr8-122699073-122699403	0.00581088	0.207126	0.145	0.109	1	ENSMUST00000127984	Cbfa2t3	ENSMUSG00000006362	protein_coding	utr	chr8-122698894-122699109	chr8-122699073-122699403	0
chr9-120350269-120350796	0.00583521	-0.360153	0.048	0.126	1	ENSMUST00000048121	Myrip	ENSMUSG00000041794	protein_coding	gap	chr9-120335741-120388111	chr9-120350269-120350796	0
chr9-120303327-120304202	0.00583957	-0.360903	0.057	0.152	1	ENSMUST00000048121	Myrip	ENSMUSG00000041794	protein_coding	utr	chr9-120303936-120304200	chr9-120303327-120304202	0
chr11-12036432-12037856	0.00586199	-0.289455	0.088	0.197	1	ENSMUST00000093321	Grb10	ENSMUSG00000020176	protein_coding	utr	chr11-12037192-12037401	chr11-12036432-12037856	0
chr5-130853124-130853712	0.00586786	0.174972	0.067	0.033	1	ENSMUST00000111288	Caln1	ENSMUSG00000060371	protein_coding	utr	chr5-130839411-130840645	chr5-130853124-130853712	12478
chr2-93372290-93372594	0.00588744	-0.264499	0.02	0.061	1	ENSMUST00000158448	Gm23380	ENSMUSG00000089073	rRNA	exon	chr2-93386727-93386829	chr2-93372290-93372594	14132
chr2-59437912-59439081	0.0059058	-0.240522	0.123	0.25	1	ENSMUST00000028369	Dapl1	ENSMUSG00000026989	protein_coding	exon	chr2-59484653-59484766	chr2-59437912-59439081	45571
chr9-70502692-70504081	0.0059111	-0.196338	0.217	0.356	1	ENSMUST00000113595	Rnf111	ENSMUSG00000032217	protein_coding	utr	chr9-70503232-70503354	chr9-70502692-70504081	0
chr1-40275138-40275733	0.00591847	-0.287175	0.038	0.116	1	ENSMUST00000195402	Il1r1	ENSMUSG00000026072	protein_coding	gap	chr1-40267488-40276097	chr1-40275138-40275733	0
chr11-49626594-49627073	0.00592778	0.260965	0.158	0.114	1	ENSMUST00000020617	Flt4	ENSMUSG00000020357	protein_coding	cds	chr11-49626669-49626837	chr11-49626594-49627073	0
chr1-58391989-58394069	0.0059358	-0.197701	0.228	0.384	1	ENSMUST00000186949	Bzw1	ENSMUSG00000051223	protein_coding	cds	chr1-58393541-58393626	chr1-58391989-58394069	0
chr2-119407979-119408624	0.00593671	-0.331477	0.053	0.129	1	ENSMUST00000110808	Ino80	ENSMUSG00000034154	protein_coding	gap	chr2-119406944-119412401	chr2-119407979-119408624	0
chr14-72708662-72710756	0.00594577	-0.192941	0.165	0.313	1	ENSMUST00000162478	Fndc3a	ENSMUSG00000033487	protein_coding	utr	chr14-72709394-72709542	chr14-72708662-72710756	0
chr8-84730488-84731295	0.00596335	0.191014	0.07	0.035	1	ENSMUST00000126806	Nfix	ENSMUSG00000001911	protein_coding	gap	chr8-84727968-84771783	chr8-84730488-84731295	0
chr13-42573990-42574597	0.00598135	-0.274176	0.023	0.083	1	ENSMUST00000128646	Phactr1	ENSMUSG00000054728	protein_coding	exon	chr13-42680623-42680926	chr13-42573990-42574597	106025
chr14-121450751-121451517	0.00599912	-0.219707	0.06	0.174	1	ENSMUST00000088386	Slc15a1	ENSMUSG00000025557	protein_coding	utr	chr14-121459621-121460581	chr14-121450751-121451517	8103
chr12-54187229-54188480	0.00600344	0.102061	0.157	0.146	1	ENSMUST00000039516	Egln3	ENSMUSG00000035105	protein_coding	gap	chr12-54185661-54203204	chr12-54187229-54188480	0
chr15-79833225-79834868	0.00603135	0.128213	0.262	0.258	1	ENSMUST00000148358	Cbx6	ENSMUSG00000089715	protein_coding	cds	chr15-79834143-79834211	chr15-79833225-79834868	0
chr6-37735607-37736265	0.00604161	-0.351549	0.075	0.172	1	ENSMUST00000031859	Trim24	ENSMUSG00000029833	protein_coding	exon	chr6-37870811-37871474	chr6-37735607-37736265	134545
chr18-33373560-33374282	0.0060714	0.127949	0.06	0.038	1	ENSMUST00000171533	Nrep	ENSMUSG00000042834	protein_coding	utr	chr18-33437019-33438713	chr18-33373560-33374282	62736
chr2-152707278-152707992	0.00607944	-0.269416	0.168	0.303	1	ENSMUST00000125366	H13	ENSMUSG00000019188	protein_coding	utr	chr2-152704725-152708670	chr2-152707278-152707992	0
chr13-112088208-112088856	0.00607957	0.135112	0.063	0.045	1	ENSMUST00000156109	Gm15323	ENSMUSG00000086092	lincRNA	exon	chr13-112017136-112017332	chr13-112088208-112088856	70875
chr10-4151655-4152688	0.00611016	-0.333109	0.065	0.157	1	ENSMUST00000120585	Mthfd1l	ENSMUSG00000040675	protein_coding	gap	chr10-4148127-4166480	chr10-4151655-4152688	0
chr15-36875964-36876570	0.00611137	-0.303182	0.063	0.169	1	ENSMUST00000100713	Gm10384	ENSMUSG00000072618	protein_coding	gap	chr15-36872418-36879687	chr15-36875964-36876570	0
chr10-94462322-94463203	0.0061434	-0.291755	0.112	0.22	1	ENSMUST00000132743	Tmcc3	ENSMUSG00000020023	protein_coding	gap	chr10-94430640-94578422	chr10-94462322-94463203	0
chr5-124210681-124211063	0.00614863	-0.259498	0.023	0.086	1	ENSMUST00000162812	Pitpnm2	ENSMUSG00000029406	protein_coding	gap	chr5-124152720-124216315	chr5-124210681-124211063	0
chr4-76449322-76451023	0.00617038	-0.227312	0.028	0.104	1	ENSMUST00000107289	Ptprd	ENSMUSG00000028399	protein_coding	utr	chr4-76449643-76449980	chr4-76449322-76451023	0
chr15-6278312-6279123	0.00617091	0.156645	0.062	0.045	1	ENSMUST00000078019	Dab2	ENSMUSG00000022150	protein_coding	exon	chr15-6299788-6299899	chr15-6278312-6279123	20664
chr6-94165974-94166455	0.00617732	0.156965	0.11	0.088	1	ENSMUST00000089317	Magi1	ENSMUSG00000045095	protein_coding	gap	chr6-93943321-94283009	chr6-94165974-94166455	0
chr1-64114467-64114803	0.00620939	-0.286949	0.013	0.073	1	ENSMUST00000135075	Klf7	ENSMUSG00000025959	protein_coding	gap	chr1-64079335-64120899	chr1-64114467-64114803	0
chr13-8643943-8644248	0.00622385	-0.256065	0.045	0.086	1	ENSMUST00000135574	Adarb2	ENSMUSG00000052551	protein_coding	gap	chr13-8570575-8672404	chr13-8643943-8644248	0
chr6-52792179-52793016	0.00625185	-0.387647	0.072	0.172	1	ENSMUST00000136250	Jazf1	ENSMUSG00000063568	protein_coding	gap	chr6-52777705-52812102	chr6-52792179-52793016	0
chr6-53880494-53881161	0.00625652	-0.323121	0.025	0.093	1	ENSMUST00000166545	Cpvl	ENSMUSG00000052955	protein_coding	gap	chr6-53873525-53896423	chr6-53880494-53881161	0
chr14-45529297-45530760	0.00626408	-0.256345	0.21	0.361	1	ENSMUST00000150660	Fermt2	ENSMUSG00000037712	protein_coding	cds	chr14-45529425-45529581	chr14-45529297-45530760	0
chr5-105875392-105877420	0.00630395	-0.176289	0.227	0.394	1	ENSMUST00000150440	Zfp326	ENSMUSG00000029290	protein_coding	cds	chr5-105876683-105876698	chr5-105875392-105877420	0
chr15-9070301-9073047	0.00633167	-0.161945	0.335	0.482	1	ENSMUST00000100790	Nadk2	ENSMUSG00000022253	protein_coding	cds	chr15-9071502-9071765	chr15-9070301-9073047	0
chr6-100734408-100734758	0.00633326	0.284306	0.127	0.076	1	ENSMUST00000032157	Gxylt2	ENSMUSG00000030074	protein_coding	gap	chr6-100733371-100750397	chr6-100734408-100734758	0
chrX-159254028-159256359	0.00634555	-0.169781	0.255	0.414	1	ENSMUST00000148570	Rps6ka3	ENSMUSG00000031309	protein_coding	cds	chrX-159256126-159256188	chrX-159254028-159256359	0
chr2-38535559-38536878	0.00640681	-0.210257	0.107	0.255	1	ENSMUST00000156726	Nek6	ENSMUSG00000026749	protein_coding	gap	chr2-38514659-38550552	chr2-38535559-38536878	0
chr19-6339809-6341851	0.00640768	-0.168115	0.322	0.487	1	ENSMUST00000170292	Men1	ENSMUSG00000024947	protein_coding	cds	chr19-6339847-6340172	chr19-6339809-6341851	0
chr18-61767416-61768453	0.00642974	-0.31572	0.108	0.22	1	ENSMUST00000154876	Afap1l1	ENSMUSG00000033032	protein_coding	gap	chr18-61758729-61786575	chr18-61767416-61768453	0
chr4-8938695-8939594	0.00643254	-0.287608	0.083	0.182	1	ENSMUST00000051558	Chd7	ENSMUSG00000041235	protein_coding	utr	chr4-8866656-8867659	chr4-8938695-8939594	71035
chr2-25110716-25111742	0.00643821	-0.286504	0.182	0.331	1	ENSMUST00000123483	Gm13387	ENSMUSG00000087028	lincRNA	exon	chr2-25122603-25122731	chr2-25110716-25111742	10860
chr8-41031600-41032280	0.00645061	-0.204335	0.013	0.056	1	ENSMUST00000155174	Mtus1	ENSMUSG00000045636	protein_coding	gap	chr8-41022595-41039284	chr8-41031600-41032280	0
chr16-4763141-4763686	0.00646276	0.115622	0.05	0.035	1	ENSMUST00000154117	Hmox2	ENSMUSG00000004070	protein_coding	gap	chr16-4726472-4764605	chr16-4763141-4763686	0
chr16-20097108-20098500	0.00646811	-0.162087	0.302	0.467	1	ENSMUST00000023509	Klhl24	ENSMUSG00000062901	protein_coding	utr	chr16-20097554-20097671	chr16-20097108-20098500	0
chr18-69198136-69198802	0.00646926	-0.254596	0.025	0.086	1	ENSMUST00000157541	Gm23536	ENSMUSG00000088166	rRNA	exon	chr18-69173987-69174120	chr18-69198136-69198802	24015
chr12-117478832-117479412	0.00647523	-0.172234	0.013	0.063	1	ENSMUST00000109691	Rapgef5	ENSMUSG00000041992	protein_coding	exon	chr12-117516479-117516903	chr12-117478832-117479412	37066
chr12-102532133-102533197	0.00650173	0.166861	0.053	0.025	1	ENSMUST00000021610	Chga	ENSMUSG00000021194	protein_coding	exon	chr12-102554969-102555170	chr12-102532133-102533197	21771
chr5-75977816-75978897	0.00650949	-0.282718	0.172	0.29	1	ENSMUST00000113516	Kdr	ENSMUSG00000062960	protein_coding	cds	chr5-75978102-75978168	chr5-75977816-75978897	0
chr9-122091638-122092265	0.00652357	-0.333247	0.033	0.106	1	ENSMUST00000146832	Snrk	ENSMUSG00000038145	protein_coding	exon	chr9-122117283-122117407	chr9-122091638-122092265	25017
chr8-127515816-127516429	0.00652727	-0.181818	0.013	0.066	1	ENSMUST00000162665	Pard3	ENSMUSG00000025812	protein_coding	gap	chr8-127474616-127593060	chr8-127515816-127516429	0
chr6-53495837-53496808	0.00653954	0.170756	0.165	0.139	1	ENSMUST00000047450	Creb5	ENSMUSG00000053007	protein_coding	exon	chr6-53573384-53573438	chr6-53495837-53496808	76575
chr13-43236647-43236930	0.00657315	-0.370355	0.087	0.179	1	ENSMUST00000055341	Gfod1	ENSMUSG00000051335	protein_coding	gap	chr13-43201245-43303244	chr13-43236647-43236930	0
chr10-86323091-86323795	0.00659282	0.179215	0.062	0.03	1	ENSMUST00000145864	Syn3	ENSMUSG00000059602	protein_coding	gap	chr10-86135049-86351550	chr10-86323091-86323795	0
chr4-129460800-129462495	0.0066164	-0.152381	0.395	0.551	1	ENSMUST00000048162	Bsdc1	ENSMUSG00000040859	protein_coding	cds	chr4-129461942-129462002	chr4-129460800-129462495	0
chr6-140955734-140956548	0.00661898	-0.326251	0.03	0.091	1	ENSMUST00000111844	Gm11077	ENSMUSG00000079264	protein_coding	cds	chr6-140756022-140756053	chr6-140955734-140956548	199680
chr5-120674395-120675114	0.00662719	0.137105	0.063	0.048	1	ENSMUST00000156722	Rasal1	ENSMUSG00000029602	protein_coding	cds	chr5-120674567-120674739	chr5-120674395-120675114	0
chr8-11779693-11780170	0.00666032	-0.359832	0.057	0.159	1	ENSMUST00000110909	Arhgef7	ENSMUSG00000031511	protein_coding	gap	chr8-11758518-11781154	chr8-11779693-11780170	0
chr4-129384014-129384996	0.00666241	-0.252716	0.02	0.088	1	ENSMUST00000030610	Zbtb8a	ENSMUSG00000028807	protein_coding	exon	chr4-129377740-129378116	chr4-129384014-129384996	5897
chr3-52048132-52048414	0.00666291	-0.311532	0.042	0.121	1	ENSMUST00000121440	Maml3	ENSMUSG00000061143	protein_coding	gap	chr3-51857077-52103678	chr3-52048132-52048414	0
chr13-68581217-68582889	0.00668758	0.114615	0.322	0.313	1	ENSMUST00000051784	Fastkd3	ENSMUSG00000021532	protein_coding	utr	chr13-68582248-68582350	chr13-68581217-68582889	0
chr5-115145309-115145992	0.00672461	-0.28907	0.027	0.091	1	ENSMUST00000112121	Mlec	ENSMUSG00000048578	protein_coding	utr	chr5-115142981-115147914	chr5-115145309-115145992	0
chr7-80058469-80059634	0.00673088	0.110905	0.093	0.078	1	ENSMUST00000166250	Zfp710	ENSMUSG00000048897	protein_coding	gap	chr7-80024987-80081048	chr7-80058469-80059634	0
chr1-59738673-59740239	0.00676208	-0.290583	0.032	0.101	1	ENSMUST00000191142	Nop58	ENSMUSG00000026020	protein_coding	utr	chr1-59711322-59719044	chr1-59738673-59740239	19628
chr3-89887275-89888065	0.00676702	-0.12415	0.01	0.056	1	ENSMUST00000029559	Il6ra	ENSMUSG00000027947	protein_coding	gap	chr3-89887207-89889186	chr3-89887275-89888065	0
chr10-53467523-53467995	0.0068011	-0.239923	0.018	0.073	1	ENSMUST00000168554	Gm5423	ENSMUSG00000056219	protein_coding	exon	chr10-53474964-53475467	chr10-53467523-53467995	6968
chr19-40512699-40514128	0.00680214	-0.16846	0.298	0.46	1	ENSMUST00000176939	Aldh18a1	ENSMUSG00000025007	protein_coding	utr	chr19-40550257-40551147	chr19-40512699-40514128	36128
chr17-55711916-55712947	0.00680464	-0.191946	0.138	0.255	1	ENSMUST00000086876	Pot1b	ENSMUSG00000024174	protein_coding	utr	chr17-55712540-55712628	chr17-55711916-55712947	0
chr2-127736456-127737071	0.00681839	0.278936	0.172	0.116	1	ENSMUST00000028857	Nphp1	ENSMUSG00000027378	protein_coding	utr	chr2-127740732-127740915	chr2-127736456-127737071	3660
chr10-120751233-120752307	0.00683634	-0.207936	0.02	0.073	1	ENSMUST00000056994	4921513I03Rik	ENSMUSG00000044544	protein_coding	exon	chr10-120765774-120765838	chr10-120751233-120752307	13466
chr4-107139775-107140299	0.00685001	-0.253972	0.017	0.066	1	ENSMUST00000141165	Tceanc2	ENSMUSG00000028619	protein_coding	cds	chr4-107139697-107139799	chr4-107139775-107140299	0
chr7-67424863-67426348	0.00688376	-0.234942	0.09	0.21	1	ENSMUST00000032776	Mef2a	ENSMUSG00000030557	protein_coding	exon	chr7-67372713-67372858	chr7-67424863-67426348	52004
chr6-128295913-128296888	0.00689543	-0.358506	0.16	0.303	1	ENSMUST00000143004	Tead4	ENSMUSG00000030353	protein_coding	gap	chr6-128271123-128300534	chr6-128295913-128296888	0
chr8-126797171-126798122	0.0069116	-0.240231	0.088	0.217	1	ENSMUST00000179857	Tomm20	ENSMUSG00000093904	protein_coding	utr	chr8-126930664-126935014	chr8-126797171-126798122	132541
chr15-3339675-3340217	0.00691495	-0.255045	0.015	0.063	1	ENSMUST00000161770	Ghr	ENSMUSG00000055737	protein_coding	gap	chr15-3333526-3340918	chr15-3339675-3340217	0
chr19-3832757-3833443	0.00691586	0.1234	0.133	0.121	1	ENSMUST00000118575	Gm16066	ENSMUSG00000082848	processed_transcript	gap	chr19-3803545-3852339	chr19-3832757-3833443	0
chr12-8494213-8494963	0.00691815	0.182399	0.133	0.073	1	ENSMUST00000067384	Rhob	ENSMUSG00000054364	protein_coding	utr	chr12-8497763-8499041	chr12-8494213-8494963	2799
chr3-130059660-130061562	0.00694474	-0.198744	0.208	0.359	1	ENSMUST00000001079	Sec24b	ENSMUSG00000001052	protein_coding	cds	chr3-130060569-130060668	chr3-130059660-130061562	0
chr8-90907561-90909555	0.00698573	-0.144595	0.423	0.561	1	ENSMUST00000098517	Gm6658	ENSMUSG00000074171	protein_coding	cds	chr8-90907939-90908415	chr8-90907561-90909555	0
chr11-88739810-88740337	0.00698832	-0.343574	0.023	0.091	1	ENSMUST00000134567	Gm11493	ENSMUSG00000085646	lincRNA	exon	chr11-88741011-88741365	chr11-88739810-88740337	673
chr2-65516374-65517160	0.00699917	0.122896	0.05	0.035	1	ENSMUST00000100069	Scn3a	ENSMUSG00000057182	protein_coding	gap	chr2-65514763-65520822	chr2-65516374-65517160	0
chr3-109491411-109492091	0.00700071	-0.153277	0.012	0.053	1	ENSMUST00000126179	Vav3	ENSMUSG00000033721	protein_coding	gap	chr3-109424108-109494777	chr3-109491411-109492091	0
chr6-141485157-141485794	0.00700737	-0.340965	0.052	0.131	1	ENSMUST00000043259	Pde3a	ENSMUSG00000041741	protein_coding	gap	chr6-141483966-141487495	chr6-141485157-141485794	0
chr4-114471769-114472611	0.00701034	0.151151	0.06	0.03	1	ENSMUST00000094894	Trabd2b	ENSMUSG00000070867	protein_coding	gap	chr4-114409454-114580290	chr4-114471769-114472611	0
chr6-112287667-112288128	0.00701083	-0.349292	0.04	0.109	1	ENSMUST00000032376	Lmcd1	ENSMUSG00000057604	protein_coding	gap	chr6-112273973-112305048	chr6-112287667-112288128	0
chr11-5140493-5141634	0.00701966	0.216309	0.178	0.131	1	ENSMUST00000163299	Emid1	ENSMUSG00000034164	protein_coding	gap	chr11-5135432-5143826	chr11-5140493-5141634	0
chr2-90661326-90661729	0.00702017	-0.271716	0.03	0.086	1	ENSMUST00000057481	Nup160	ENSMUSG00000051329	protein_coding	exon	chr2-90677215-90677470	chr2-90661326-90661729	15485
chr16-11062801-11063667	0.00704395	0.105018	0.117	0.109	1	ENSMUST00000162323	Litaf	ENSMUSG00000022500	protein_coding	gap	chr16-10966650-11065997	chr16-11062801-11063667	0
chr10-4111041-4112158	0.00705025	-0.400425	0.1	0.23	1	ENSMUST00000120585	Mthfd1l	ENSMUSG00000040675	protein_coding	gap	chr10-4106530-4148008	chr10-4111041-4112158	0
chr8-10945412-10946607	0.00707629	-0.226915	0.128	0.268	1	ENSMUST00000040608	3930402G23Rik	ENSMUSG00000038917	lincRNA	exon	chr8-10928269-10928457	chr8-10945412-10946607	16954
chr3-122628936-122630097	0.00707713	-0.273587	0.062	0.154	1	ENSMUST00000162409	Fnbp1l	ENSMUSG00000039735	protein_coding	exon	chr3-122619530-122619667	chr3-122628936-122630097	9268
chr7-4128703-4129265	0.00709223	0.232354	0.143	0.098	1	ENSMUST00000148318	D030047H15Rik	ENSMUSG00000085886	processed_transcript	gap	chr7-4128324-4132405	chr7-4128703-4129265	0
chr9-115526032-115527289	0.0071096	-0.215663	0.03	0.078	1	ENSMUST00000082810	n-R5s92	ENSMUSG00000094630	rRNA	exon	chr9-115626600-115626718	chr9-115526032-115527289	99310
chr3-34019239-34020879	0.00712015	-0.189326	0.228	0.379	1	ENSMUST00000167354	Fxr1	ENSMUSG00000027680	protein_coding	cds	chr3-34020113-34020163	chr3-34019239-34020879	0
chr5-53961270-53961675	0.00714259	-0.381276	0.032	0.109	1	ENSMUST00000117661	Stim2	ENSMUSG00000039156	protein_coding	exon	chr5-53998417-53999034	chr5-53961270-53961675	36741
chr14-79425866-79426740	0.00715746	-0.191514	0.215	0.374	1	ENSMUST00000061222	Kbtbd7	ENSMUSG00000043881	protein_coding	cds	chr14-79426730-79428802	chr14-79425866-79426740	0
chr9-64045015-64045718	0.00716757	-0.2943	0.053	0.134	1	ENSMUST00000158363	Gm25606	ENSMUSG00000088988	rRNA	exon	chr9-64048496-64048590	chr9-64045015-64045718	2777
chr13-98027184-98028356	0.00719913	0.102226	0.098	0.078	1	ENSMUST00000109426	Arhgef28	ENSMUSG00000021662	protein_coding	gap	chr13-97996934-98029376	chr13-98027184-98028356	0
chr16-45757428-45757859	0.00721896	-0.299872	0.055	0.136	1	ENSMUST00000134802	Phldb2	ENSMUSG00000033149	protein_coding	gap	chr16-45757246-45758116	chr16-45757428-45757859	0
chr3-149232835-149234258	0.00724846	-0.240432	0.033	0.104	1	ENSMUST00000180599	Gm10287	ENSMUSG00000070342	lincRNA	exon	chr3-149221687-149225745	chr3-149232835-149234258	7089
chr15-64381779-64383142	0.00725158	-0.262355	0.137	0.273	1	ENSMUST00000177374	Asap1	ENSMUSG00000022377	protein_coding	utr	chr15-64382717-64382919	chr15-64381779-64383142	0
chr13-5899046-5899468	0.00725735	0.23024	0.095	0.053	1	ENSMUST00000000080	Klf6	ENSMUSG00000000078	protein_coding	utr	chr13-5867284-5870393	chr13-5899046-5899468	28652
chr5-107233768-107234225	0.00728005	0.158128	0.05	0.025	1	ENSMUST00000146591	Tgfbr3	ENSMUSG00000029287	protein_coding	gap	chr5-107215078-107266193	chr5-107233768-107234225	0
chr2-143846513-143847302	0.00728476	-0.220398	0.038	0.106	1	ENSMUST00000099296	Bfsp1	ENSMUSG00000027420	protein_coding	gap	chr2-143845991-143848927	chr2-143846513-143847302	0
chr3-8666550-8668148	0.00730818	-0.14012	0.408	0.54	1	ENSMUST00000042412	Hey1	ENSMUSG00000040289	protein_coding	cds	chr3-8666782-8666870	chr3-8666550-8668148	0
chr8-90854416-90855359	0.00731725	-0.233259	0.063	0.134	1	ENSMUST00000109614	Chd9	ENSMUSG00000056608	protein_coding	gap	chr8-90849760-90932248	chr8-90854416-90855359	0
chr17-86801257-86802390	0.00733762	-0.265556	0.058	0.157	1	ENSMUST00000024954	Epas1	ENSMUSG00000024140	protein_coding	gap	chr17-86797307-86805192	chr17-86801257-86802390	0
chr11-95079372-95079811	0.0073457	-0.366711	0.07	0.162	1	ENSMUST00000120375	Itga3	ENSMUSG00000001507	protein_coding	exon	chr11-95076768-95076801	chr11-95079372-95079811	2570
chr17-4867779-4868621	0.00735755	0.157864	0.063	0.035	1	ENSMUST00000124362	Arid1b	ENSMUSG00000069729	protein_coding	exon	chr17-4994332-4994399	chr17-4867779-4868621	125710
chr17-43326639-43328131	0.00735808	-0.255706	0.087	0.202	1	ENSMUST00000047399	Gpr110	ENSMUSG00000041293	protein_coding	utr	chr17-43323919-43324737	chr17-43326639-43328131	1901
chr4-123411161-123412520	0.00736802	-0.188961	0.328	0.467	1	ENSMUST00000151346	Macf1	ENSMUSG00000028649	protein_coding	gap	chr4-123401913-123431997	chr4-123411161-123412520	0
chr2-122145710-122145991	0.007369	-0.157202	0.008	0.053	1	ENSMUST00000028665	Patl2	ENSMUSG00000027233	protein_coding	gap	chr2-122130156-122179094	chr2-122145710-122145991	0
chr5-111810180-111810828	0.00737107	0.144507	0.082	0.066	1	ENSMUST00000129065	E130006D01Rik	ENSMUSG00000085271	lincRNA	exon	chr5-111761636-111761725	chr5-111810180-111810828	48454
chr6-51690701-51691247	0.00739265	-0.313127	0.027	0.078	1	ENSMUST00000049152	Snx10	ENSMUSG00000038301	protein_coding	utr	chr6-51588963-51590679	chr6-51690701-51691247	100021
chr10-38986081-38986286	0.00743417	0.197267	0.062	0.035	1	ENSMUST00000162211	Lama4	ENSMUSG00000019846	protein_coding	gap	chr10-38966150-39005411	chr10-38986081-38986286	0
chr5-113365761-113366286	0.00745247	0.127536	0.057	0.04	1	ENSMUST00000066573	Aym1	ENSMUSG00000053873	protein_coding	utr	chr5-113357655-113357821	chr5-113365761-113366286	7939
chr14-75851839-75852364	0.00745427	0.122104	0.062	0.035	1	ENSMUST00000142061	Tpt1	ENSMUSG00000060126	protein_coding	utr	chr14-75848102-75848525	chr14-75851839-75852364	3313
chr8-117338489-117340583	0.00746306	-0.228684	0.122	0.263	1	ENSMUST00000166750	Cmip	ENSMUSG00000034390	protein_coding	gap	chr8-117257402-117377074	chr8-117338489-117340583	0
chr8-121115910-121116934	0.00747932	0.102851	0.175	0.179	1	ENSMUST00000054691	Foxc2	ENSMUSG00000046714	protein_coding	cds	chr8-121116615-121118099	chr8-121115910-121116934	0
chr1-52166598-52167033	0.00747968	0.164705	0.083	0.053	1	ENSMUST00000156887	Gls	ENSMUSG00000026103	protein_coding	gap	chr1-52166315-52168335	chr1-52166598-52167033	0
chr13-109902068-109904064	0.007485	-0.181283	0.093	0.24	1	ENSMUST00000177907	Pde4d	ENSMUSG00000021699	protein_coding	cds	chr13-109903577-109903689	chr13-109902068-109904064	0
chr19-26617374-26617614	0.00749683	-0.316456	0.01	0.066	1	ENSMUST00000176030	Smarca2	ENSMUSG00000024921	protein_coding	gap	chr19-26605234-26619683	chr19-26617374-26617614	0
chr8-68336319-68336897	0.00750176	-0.238817	0.022	0.083	1	ENSMUST00000066594	Sh2d4a	ENSMUSG00000053886	protein_coding	gap	chr8-68335196-68345952	chr8-68336319-68336897	0
chr13-24337698-24339034	0.00752856	-0.234388	0.138	0.278	1	ENSMUST00000167746	Cmah	ENSMUSG00000016756	protein_coding	gap	chr13-24327489-24395198	chr13-24337698-24339034	0
chr13-73425514-73426228	0.00753051	0.100515	0.057	0.043	1	ENSMUST00000022099	Lpcat1	ENSMUSG00000021608	protein_coding	exon	chr13-73467197-73467517	chr13-73425514-73426228	40968
chr1-90497403-90498071	0.00753481	-0.22448	0.05	0.116	1	ENSMUST00000187630	Gm28722	ENSMUSG00000101997	lincRNA	exon	chr1-90454337-90454501	chr1-90497403-90498071	42901
chr3-107818606-107819615	0.00753536	-0.216402	0.032	0.126	1	ENSMUST00000037375	Eps8l3	ENSMUSG00000040600	protein_coding	exon	chr3-107877230-107877366	chr3-107818606-107819615	57614
chr4-119274431-119275564	0.00754359	-0.307664	0.088	0.192	1	ENSMUST00000079644	Ybx1	ENSMUSG00000028639	protein_coding	utr	chr4-119277981-119278367	chr4-119274431-119275564	2416
chr11-79325605-79325964	0.00754524	-0.285324	0.018	0.076	1	ENSMUST00000145839	Nf1	ENSMUSG00000020716	protein_coding	exon	chr11-79339693-79340059	chr11-79325605-79325964	13728
chr9-57588894-57590176	0.00757636	-0.192932	0.102	0.237	1	ENSMUST00000053230	Ulk3	ENSMUSG00000032308	protein_coding	cds	chr9-57589585-57589686	chr9-57588894-57590176	0
chr10-62534557-62534851	0.00758958	-0.285045	0.017	0.066	1	ENSMUST00000159704	2510003E04Rik	ENSMUSG00000036955	protein_coding	utr	chr10-62538626-62540029	chr10-62534557-62534851	3774
chr5-143625548-143625939	0.00759243	-0.178009	0.01	0.053	1	ENSMUST00000177196	Cyth3	ENSMUSG00000018001	protein_coding	gap	chr5-143622674-143650526	chr5-143625548-143625939	0
chr14-121660941-121661333	0.00762019	-0.208419	0.017	0.056	1	ENSMUST00000100299	Dock9	ENSMUSG00000025558	protein_coding	gap	chr14-121660503-121662510	chr14-121660941-121661333	0
chr1-89481143-89481653	0.00762923	-0.326558	0.042	0.119	1	ENSMUST00000190096	Agap1	ENSMUSG00000055013	protein_coding	gap	chr1-89455593-89604597	chr1-89481143-89481653	0
chr2-4554807-4555565	0.00763581	-0.287963	0.073	0.169	1	ENSMUST00000177457	Frmd4a	ENSMUSG00000026657	protein_coding	gap	chr2-4537326-4560213	chr2-4554807-4555565	0
chr8-117255854-117257540	0.00763951	-0.162906	0.307	0.447	1	ENSMUST00000166750	Cmip	ENSMUSG00000034390	protein_coding	cds	chr8-117257102-117257401	chr8-117255854-117257540	0
chr8-90898557-90898857	0.00765043	-0.252699	0.012	0.061	1	ENSMUST00000109614	Chd9	ENSMUSG00000056608	protein_coding	gap	chr8-90849760-90932248	chr8-90898557-90898857	0
chr3-151351316-151352323	0.00765232	-0.313085	0.043	0.119	1	ENSMUST00000046977	Eltd1	ENSMUSG00000039167	protein_coding	exon	chr3-151437887-151438004	chr3-151351316-151352323	85563
chr12-73583826-73586115	0.00767274	-0.223779	0.202	0.354	1	ENSMUST00000119092	Prkch	ENSMUSG00000021108	protein_coding	cds	chr12-73585163-73585525	chr12-73583826-73586115	0
chr9-118610995-118612550	0.00770598	-0.197741	0.052	0.134	1	ENSMUST00000044165	Itga9	ENSMUSG00000039115	protein_coding	gap	chr9-118607116-118626447	chr9-118610995-118612550	0
chr4-109116397-109116853	0.00770768	-0.21606	0.047	0.144	1	ENSMUST00000194478	Osbpl9	ENSMUSG00000028559	protein_coding	gap	chr4-109107950-109133743	chr4-109116397-109116853	0
chr16-58727412-58728684	0.00771354	-0.186152	0.222	0.366	1	ENSMUST00000162191	Cldn25	ENSMUSG00000022744	protein_coding	utr	chr16-58728048-58728084	chr16-58727412-58728684	0
chr10-59950238-59952503	0.00772187	0.123636	0.59	0.581	1	ENSMUST00000020308	Ddit4	ENSMUSG00000020108	protein_coding	cds	chr10-59951317-59951512	chr10-59950238-59952503	0
chr3-27882142-27882682	0.0077278	-0.235487	0.023	0.063	1	ENSMUST00000058077	Tmem212	ENSMUSG00000043164	protein_coding	gap	chr3-27866214-27884792	chr3-27882142-27882682	0
chr10-119063015-119063686	0.00776921	-0.355056	0.102	0.21	1	ENSMUST00000187551	1700064J06Rik	ENSMUSG00000100681	lincRNA	exon	chr10-119092905-119092933	chr10-119063015-119063686	29218
chr19-32214874-32215530	0.00779573	-0.207268	0.037	0.114	1	ENSMUST00000152340	Sgms1	ENSMUSG00000040451	protein_coding	gap	chr19-32160364-32223508	chr19-32214874-32215530	0
chr2-32667745-32668045	0.00783036	0.185834	0.053	0.03	1	ENSMUST00000167841	Eng	ENSMUSG00000026814	protein_coding	gap	chr2-32657671-32669422	chr2-32667745-32668045	0
chr5-137098493-137098752	0.00784387	-0.27994	0.013	0.071	1	ENSMUST00000054384	Trim56	ENSMUSG00000043279	protein_coding	utr	chr5-137105644-137112455	chr5-137098493-137098752	6891
chr3-139073818-139076302	0.00786111	-0.166908	0.273	0.427	1	ENSMUST00000098574	Rap1gds1	ENSMUSG00000028149	protein_coding	cds	chr3-139075036-139075039	chr3-139073818-139076302	0
chr2-132692308-132692651	0.00786756	-0.21706	0.023	0.086	1	ENSMUST00000148271	1110034G24Rik	ENSMUSG00000044991	protein_coding	gap	chr2-132692132-132750212	chr2-132692308-132692651	0
chr15-53848233-53848940	0.00787372	-0.335289	0.088	0.194	1	ENSMUST00000154119	Samd12	ENSMUSG00000058656	protein_coding	gap	chr15-53719745-53860103	chr15-53848233-53848940	0
chr15-36361139-36362025	0.00787463	-0.227811	0.035	0.098	1	ENSMUST00000090170	Rpl7a-ps3	ENSMUSG00000068579	protein_coding	exon	chr15-36308144-36308956	chr15-36361139-36362025	52182
chr8-95141502-95142917	0.00788748	-0.230707	0.073	0.182	1	ENSMUST00000169748	Kifc3	ENSMUSG00000031788	protein_coding	utr	chr8-95142432-95142540	chr8-95141502-95142917	0
chr6-31550936-31551516	0.0078933	0.222386	0.137	0.101	1	ENSMUST00000026698	Podxl	ENSMUSG00000025608	protein_coding	gap	chr6-31529037-31563578	chr6-31550936-31551516	0
chr19-24224465-24225729	0.00791631	-0.240298	0.188	0.338	1	ENSMUST00000099558	Tjp2	ENSMUSG00000024812	protein_coding	utr	chr19-24224851-24225026	chr19-24224465-24225729	0
chr5-104072293-104072592	0.00795745	-0.241824	0.018	0.061	1	ENSMUST00000178967	Gm17660	ENSMUSG00000091034	protein_coding	gap	chr5-104072098-104073537	chr5-104072293-104072592	0
chr5-8995878-8997772	0.00797728	-0.189066	0.218	0.366	1	ENSMUST00000003720	Crot	ENSMUSG00000003623	protein_coding	utr	chr5-8997104-8997324	chr5-8995878-8997772	0
chr3-154723077-154723615	0.00803412	-0.194424	0.017	0.053	1	ENSMUST00000098496	BC007180	ENSMUSG00000078161	protein_coding	gap	chr3-154720280-154727393	chr3-154723077-154723615	0
chr17-36257078-36258031	0.00804046	-0.187277	0.077	0.197	1	ENSMUST00000172573	Rpp21	ENSMUSG00000024446	protein_coding	cds	chr17-36257606-36257610	chr17-36257078-36258031	0
chr9-110531827-110533320	0.00804529	-0.164271	0.29	0.434	1	ENSMUST00000153838	Setd2	ENSMUSG00000044791	protein_coding	cds	chr9-110532679-110532752	chr9-110531827-110533320	0
chr1-153730324-153731165	0.00808144	0.177058	0.095	0.063	1	ENSMUST00000190663	C230024C17Rik	ENSMUSG00000100334	lincRNA	gap	chr1-153724098-153731869	chr1-153730324-153731165	0
chr11-43344478-43345160	0.00809824	-0.293199	0.033	0.101	1	ENSMUST00000153791	Gm12148	ENSMUSG00000084889	lincRNA	exon	chr11-43385482-43385616	chr11-43344478-43345160	40321
chr4-103118961-103120694	0.00811946	-0.191279	0.207	0.359	1	ENSMUST00000106857	Mier1	ENSMUSG00000028522	protein_coding	cds	chr4-103119501-103119509	chr4-103118961-103120694	0
chr5-150117996-150119290	0.00812205	-0.187121	0.183	0.326	1	ENSMUST00000131212	Rxfp2	ENSMUSG00000053368	protein_coding	exon	chr5-150080945-150082184	chr5-150117996-150119290	35811
chr4-132958755-132959919	0.00813461	0.105567	0.215	0.235	1	ENSMUST00000124451	Fgr	ENSMUSG00000028874	protein_coding	exon	chr4-132974095-132974270	chr4-132958755-132959919	14175
chr12-82454197-82454736	0.00814688	-0.335085	0.053	0.134	1	ENSMUST00000166429	Sipa1l1	ENSMUSG00000042700	protein_coding	utr	chr12-82449939-82451782	chr12-82454197-82454736	2414
chr13-28724161-28724663	0.00815635	-0.352249	0.058	0.154	1	ENSMUST00000148885	2610307P16Rik	ENSMUSG00000085936	processed_transcript	gap	chr13-28669995-28772618	chr13-28724161-28724663	0
chr2-152636177-152637115	0.00815854	0.102269	0.123	0.119	1	ENSMUST00000139370	Rem1	ENSMUSG00000000359	protein_coding	exon	chr2-152634446-152635198	chr2-152636177-152637115	978
chr17-7840312-7841621	0.00816498	-0.177806	0.017	0.061	1	ENSMUST00000167580	Fndc1	ENSMUSG00000071984	protein_coding	exon	chr17-7827018-7827302	chr17-7840312-7841621	13009
chr15-86019934-86020411	0.00817594	0.192899	0.15	0.114	1	ENSMUST00000016172	Celsr1	ENSMUSG00000016028	protein_coding	gap	chr15-85979241-86030181	chr15-86019934-86020411	0
chrX-17571294-17572554	0.00819078	-0.209292	0.155	0.308	1	ENSMUST00000177213	Fundc1	ENSMUSG00000025040	protein_coding	cds	chrX-17571303-17571358	chrX-17571294-17572554	0
chr14-69862221-69862849	0.00820977	-0.152776	0.013	0.061	1	ENSMUST00000022678	Pebp4	ENSMUSG00000022085	protein_coding	gap	chr14-69851755-69963439	chr14-69862221-69862849	0
chr13-113034656-113035545	0.00821356	-0.168787	0.022	0.116	1	ENSMUST00000181741	Cdc20b	ENSMUSG00000078926	protein_coding	cds	chr13-113035387-113035441	chr13-113034656-113035545	0
chr7-112678434-112680200	0.00823107	0.117188	0.31	0.316	1	ENSMUST00000106638	Tead1	ENSMUSG00000055320	protein_coding	utr	chr7-112679357-112679726	chr7-112678434-112680200	0
chr7-45229399-45230146	0.00825798	-0.153898	0.012	0.073	1	ENSMUST00000107801	Tead2	ENSMUSG00000030796	protein_coding	gap	chr7-45228813-45231308	chr7-45229399-45230146	0
chr1-132374173-132374372	0.0082767	-0.272435	0.023	0.073	1	ENSMUST00000132435	Tmcc2	ENSMUSG00000042066	protein_coding	gap	chr1-132361216-132380656	chr1-132374173-132374372	0
chr4-89469621-89470300	0.00828772	0.187213	0.067	0.035	1	ENSMUST00000139272	Gm12610	ENSMUSG00000086035	processed_transcript	exon	chr4-89463255-89463487	chr4-89469621-89470300	6133
chr8-22756676-22758122	0.00829276	-0.228514	0.128	0.265	1	ENSMUST00000033941	Plat	ENSMUSG00000031538	protein_coding	utr	chr8-22757744-22757828	chr8-22756676-22758122	0
chr3-115779724-115780135	0.00830499	-0.272425	0.01	0.051	1	ENSMUST00000055676	S1pr1	ENSMUSG00000045092	protein_coding	exon	chr3-115714709-115715055	chr3-115779724-115780135	64668
chr4-53439672-53441508	0.00830591	-0.179687	0.232	0.391	1	ENSMUST00000107651	Slc44a1	ENSMUSG00000028412	protein_coding	cds	chr4-53440684-53440716	chr4-53439672-53441508	0
chr19-53389686-53391201	0.00830625	-0.143434	0.4	0.54	1	ENSMUST00000025997	Smndc1	ENSMUSG00000025024	protein_coding	utr	chr19-53390416-53390573	chr19-53389686-53391201	0
chr17-78199423-78201795	0.00834421	-0.192838	0.202	0.359	1	ENSMUST00000112498	Crim1	ENSMUSG00000024074	protein_coding	cds	chr17-78200769-78201099	chr17-78199423-78201795	0
chr7-80889072-80890173	0.00838147	0.107487	0.143	0.141	1	ENSMUST00000026816	Wdr73	ENSMUSG00000025722	protein_coding	utr	chr7-80890723-80891676	chr7-80889072-80890173	549
chr5-134638381-134639792	0.00841082	-0.180793	0.255	0.407	1	ENSMUST00000036125	Eif4h	ENSMUSG00000040731	protein_coding	cds	chr5-134639241-134639299	chr5-134638381-134639792	0
chr8-81581851-81582355	0.0084115	-0.307157	0.027	0.081	1	ENSMUST00000172167	Inpp4b	ENSMUSG00000037940	protein_coding	gap	chr8-81472820-81715200	chr8-81581851-81582355	0
chr1-86486729-86488242	0.00841935	0.103258	0.463	0.449	1	ENSMUST00000045897	Ptma	ENSMUSG00000026238	protein_coding	exon	chr1-86526726-86526950	chr1-86486729-86488242	38483
chr1-85792913-85794831	0.00842458	-0.180957	0.147	0.29	1	ENSMUST00000130754	Cab39	ENSMUSG00000036707	protein_coding	utr	chr1-85794468-85794549	chr1-85792913-85794831	0
chr16-22844130-22844822	0.00844791	0.145022	0.085	0.063	1	ENSMUST00000004576	Tbccd1	ENSMUSG00000004462	protein_coding	gap	chr16-22842108-22857344	chr16-22844130-22844822	0
chr10-37140656-37141558	0.00846356	-0.177391	0.262	0.407	1	ENSMUST00000191067	5930403N24Rik	ENSMUSG00000046463	processed_transcript	gap	chr10-37140746-37148876	chr10-37140656-37141558	0
chr2-148141937-148142264	0.00846368	-0.316875	0.027	0.081	1	ENSMUST00000047315	Foxa2	ENSMUSG00000037025	protein_coding	exon	chr2-148046860-148046969	chr2-148141937-148142264	94967
chr14-8309572-8310191	0.00847288	-0.334341	0.073	0.167	1	ENSMUST00000137133	Fam107a	ENSMUSG00000021750	protein_coding	utr	chr14-8309639-8309795	chr14-8309572-8310191	0
chr10-99261060-99264184	0.00849662	-0.141269	0.427	0.568	1	ENSMUST00000020118	Dusp6	ENSMUSG00000019960	protein_coding	cds	chr10-99263692-99264091	chr10-99261060-99264184	0
chr3-30353972-30354587	0.00851536	-0.337761	0.035	0.101	1	ENSMUST00000173899	Mecom	ENSMUSG00000027684	protein_coding	gap	chr3-30238322-30509429	chr3-30353972-30354587	0
chr3-68761597-68762188	0.00852574	0.206048	0.182	0.144	1	ENSMUST00000191767	RP24-399B3.7	ENSMUSG00000102936	lincRNA	gap	chr3-68761517-68762048	chr3-68761597-68762188	0
chr8-36745850-36746504	0.00853768	-0.282869	0.038	0.106	1	ENSMUST00000163663	Dlc1	ENSMUSG00000031523	protein_coding	gap	chr8-36599441-36763644	chr8-36745850-36746504	0
chr10-86249906-86250485	0.00855355	-0.26245	0.017	0.063	1	ENSMUST00000145864	Syn3	ENSMUSG00000059602	protein_coding	gap	chr10-86135049-86351550	chr10-86249906-86250485	0
chr2-152847337-152848471	0.00855656	-0.186062	0.195	0.356	1	ENSMUST00000178997	Tpx2	ENSMUSG00000027469	protein_coding	utr	chr2-152847964-152848109	chr2-152847337-152848471	0
chr1-53974830-53975323	0.00855766	-0.236637	0.008	0.058	1	ENSMUST00000146850	Hecw2	ENSMUSG00000042807	protein_coding	gap	chr1-53950922-54040200	chr1-53974830-53975323	0
chr17-46856300-46858624	0.00859679	-0.188358	0.25	0.402	1	ENSMUST00000040624	Gltscr1l	ENSMUSG00000036568	protein_coding	exon	chr17-46830951-46831413	chr17-46856300-46858624	24886
chr5-33334685-33336587	0.00860145	-0.170068	0.262	0.391	1	ENSMUST00000114449	Maea	ENSMUSG00000079562	protein_coding	cds	chr5-33335577-33335645	chr5-33334685-33336587	0
chr14-12132131-12132530	0.00862572	-0.319651	0.02	0.076	1	ENSMUST00000142917	Ptprg	ENSMUSG00000021745	protein_coding	gap	chr14-12122171-12142383	chr14-12132131-12132530	0
chr4-63558303-63559066	0.00862746	-0.192343	0.113	0.26	1	ENSMUST00000077709	6330416G13Rik	ENSMUSG00000045917	protein_coding	utr	chr4-63558781-63558957	chr4-63558303-63559066	0
chr10-86310280-86310909	0.00863592	0.165456	0.088	0.056	1	ENSMUST00000145864	Syn3	ENSMUSG00000059602	protein_coding	gap	chr10-86135049-86351550	chr10-86310280-86310909	0
chrX-17526925-17527431	0.00864596	-0.279806	0.035	0.098	1	ENSMUST00000026016	Fundc1	ENSMUSG00000025040	protein_coding	utr	chrX-17556564-17557933	chrX-17526925-17527431	29132
chr4-141315924-141316321	0.00866023	-0.313896	0.033	0.109	1	ENSMUST00000006614	Epha2	ENSMUSG00000006445	protein_coding	gap	chr4-141309081-141316586	chr4-141315924-141316321	0
chr6-92705757-92706524	0.00866665	-0.250072	0.055	0.129	1	ENSMUST00000032093	Prickle2	ENSMUSG00000030020	protein_coding	cds	chr6-92706104-92706145	chr6-92705757-92706524	0
chr16-11021263-11022462	0.00866873	-0.128678	0.01	0.068	1	ENSMUST00000162323	Litaf	ENSMUSG00000022500	protein_coding	gap	chr16-10966650-11065997	chr16-11021263-11022462	0
chr5-25066887-25067818	0.00867669	0.17875	0.208	0.179	1	ENSMUST00000030784	Prkag2	ENSMUSG00000028944	protein_coding	gap	chr5-25028537-25100010	chr5-25066887-25067818	0
chr10-78279043-78279531	0.00868884	-0.177001	0.015	0.066	1	ENSMUST00000166360	Agpat3	ENSMUSG00000001211	protein_coding	gap	chr10-78278086-78282373	chr10-78279043-78279531	0
chr16-10689622-10690656	0.00874844	-0.244788	0.065	0.152	1	ENSMUST00000155633	Clec16a	ENSMUSG00000068663	protein_coding	gap	chr16-10688632-10691385	chr16-10689622-10690656	0
chr11-107327084-107327878	0.0087729	-0.216692	0.025	0.081	1	ENSMUST00000146680	Pitpnc1	ENSMUSG00000040430	protein_coding	gap	chr11-107321676-107337411	chr11-107327084-107327878	0
chr14-30714601-30717178	0.00878192	-0.191977	0.158	0.313	1	ENSMUST00000131706	Sfmbt1	ENSMUSG00000006527	protein_coding	utr	chr14-30715167-30715241	chr14-30714601-30717178	0
chr19-12009202-12009789	0.0087931	0.16025	0.143	0.126	1	ENSMUST00000025590	Osbp	ENSMUSG00000024687	protein_coding	utr	chr19-11992043-11994105	chr19-12009202-12009789	15096
chr3-85886653-85888857	0.00879634	-0.199401	0.198	0.356	1	ENSMUST00000154148	RP24-559D1.1	ENSMUSG00000102805	protein_coding	utr	chr3-85887127-85887516	chr3-85886653-85888857	0
chr5-62765465-62766810	0.00879637	-0.201618	0.1	0.247	1	ENSMUST00000159470	Arap2	ENSMUSG00000037999	protein_coding	utr	chr5-62765520-62765656	chr5-62765465-62766810	0
chr1-133892521-133893965	0.00883012	-0.234048	0.102	0.184	1	ENSMUST00000124051	Optc	ENSMUSG00000010311	protein_coding	utr	chr1-133897199-133897799	chr1-133892521-133893965	3233
chr12-111896730-111897540	0.00885569	-0.262247	0.065	0.152	1	ENSMUST00000163747	Ppp1r13b	ENSMUSG00000021285	protein_coding	gap	chr12-111872434-111907861	chr12-111896730-111897540	0
chr7-89997752-89998904	0.00894416	-0.183582	0.03	0.104	1	ENSMUST00000181784	Gm26529	ENSMUSG00000097585	protein_coding	utr	chr7-89981250-89981848	chr7-89997752-89998904	15903
chr9-64021743-64023354	0.00896347	-0.168013	0.287	0.429	1	ENSMUST00000179458	Smad6	ENSMUSG00000036867	protein_coding	cds	chr9-64021760-64022032	chr9-64021743-64023354	0
chr14-70205664-70206933	0.00899547	-0.20658	0.295	0.449	1	ENSMUST00000181856	Gm26908	ENSMUSG00000097243	lincRNA	gap	chr14-70206855-70207587	chr14-70205664-70206933	0
chr11-30160692-30161608	0.00900837	-0.306559	0.143	0.268	1	ENSMUST00000124231	Sptbn1	ENSMUSG00000020315	protein_coding	gap	chr11-30159446-30219578	chr11-30160692-30161608	0
chr4-95466508-95467034	0.00902928	-0.276296	0.047	0.119	1	ENSMUST00000142458	Gm830	ENSMUSG00000084939	processed_transcript	exon	chr4-95464724-95467895	chr4-95466508-95467034	0
chr10-40682682-40683990	0.00905465	-0.223034	0.037	0.114	1	ENSMUST00000058747	Mettl24	ENSMUSG00000045555	protein_coding	cds	chr10-40683356-40683664	chr10-40682682-40683990	0
chr5-81275295-81275952	0.00910825	-0.283363	0.013	0.066	1	ENSMUST00000153264	Lphn3	ENSMUSG00000037605	protein_coding	gap	chr5-81197632-81309870	chr5-81275295-81275952	0
chr16-4971481-4971935	0.00911075	-0.278105	0.053	0.141	1	ENSMUST00000090457	4930451G09Rik	ENSMUSG00000022543	protein_coding	utr	chr16-4971852-4971969	chr16-4971481-4971935	0
chr11-75849557-75849879	0.00917108	-0.254715	0.032	0.081	1	ENSMUST00000121287	Rph3al	ENSMUSG00000020847	protein_coding	gap	chr11-75834877-75854303	chr11-75849557-75849879	0
chr19-32303950-32305294	0.00918852	-0.255405	0.163	0.293	1	ENSMUST00000142618	Sgms1	ENSMUSG00000040451	protein_coding	gap	chr19-32289632-32348692	chr19-32303950-32305294	0
chr4-81441992-81443204	0.00926417	-0.263747	0.088	0.194	1	ENSMUST00000107262	Mpdz	ENSMUSG00000028402	protein_coding	utr	chr4-81442636-81442805	chr4-81441992-81443204	0
chr18-12109367-12110145	0.00930213	-0.280015	0.132	0.245	1	ENSMUST00000092075	Tmem241	ENSMUSG00000049411	protein_coding	gap	chr18-12104181-12113394	chr18-12109367-12110145	0
chr1-150873030-150873558	0.0093204	-0.246765	0.022	0.071	1	ENSMUST00000137197	Hmcn1	ENSMUSG00000066842	protein_coding	gap	chr1-150860378-150876424	chr1-150873030-150873558	0
chr11-107440980-107441382	0.00934269	-0.158187	0.008	0.061	1	ENSMUST00000103064	Pitpnc1	ENSMUSG00000040430	protein_coding	gap	chr11-107337561-107469890	chr11-107440980-107441382	0
chr19-32254587-32255367	0.0093693	-0.18807	0.052	0.164	1	ENSMUST00000152340	Sgms1	ENSMUSG00000040451	protein_coding	gap	chr19-32248037-32276885	chr19-32254587-32255367	0
chr17-10038015-10038452	0.00937738	-0.388042	0.052	0.136	1	ENSMUST00000097414	Qk	ENSMUSG00000062078	protein_coding	utr	chr17-10206471-10209614	chr17-10038015-10038452	168018
chr4-130163193-130163882	0.00939871	-0.363233	0.095	0.21	1	ENSMUST00000030560	Tinagl1	ENSMUSG00000028776	protein_coding	utr	chr4-130164454-130164958	chr4-130163193-130163882	571
chr11-62821644-62822251	0.00939922	-0.234048	0.037	0.129	1	ENSMUST00000108703	Trim16	ENSMUSG00000047821	protein_coding	gap	chr11-62821000-62829102	chr11-62821644-62822251	0
chr2-122146697-122148849	0.00942455	-0.170617	0.24	0.404	1	ENSMUST00000102476	B2m	ENSMUSG00000060802	protein_coding	cds	chr2-122147738-122147804	chr2-122146697-122148849	0
chr11-113740134-113740442	0.00943665	-0.2956	0.03	0.091	1	ENSMUST00000153453	Cdc42ep4	ENSMUSG00000041598	protein_coding	gap	chr11-113729666-113750953	chr11-113740134-113740442	0
chr4-124849616-124851504	0.00948588	-0.167985	0.262	0.419	1	ENSMUST00000185036	1110065P20Rik	ENSMUSG00000078570	protein_coding	cds	chr4-124850649-124850827	chr4-124849616-124851504	0
chr3-96065573-96066387	0.00953958	-0.281651	0.065	0.177	1	ENSMUST00000015891	Vps45	ENSMUSG00000015747	protein_coding	exon	chr3-96057682-96058466	chr3-96065573-96066387	7106
chr2-27474618-27476406	0.00957564	-0.186756	0.218	0.359	1	ENSMUST00000147736	Brd3	ENSMUSG00000026918	protein_coding	utr	chr2-27475577-27475607	chr2-27474618-27476406	0
chr4-141277903-141278543	0.00960776	-0.280382	0.152	0.288	1	ENSMUST00000142429	Gm13056	ENSMUSG00000085395	lincRNA	exon	chr4-141278439-141278544	chr4-141277903-141278543	0
chr3-88022250-88024011	0.00961892	-0.20385	0.088	0.202	1	ENSMUST00000160150	Hapln2	ENSMUSG00000004894	protein_coding	cds	chr3-88023957-88024009	chr3-88022250-88024011	0
chr4-101694323-101694873	0.00962727	-0.221011	0.012	0.068	1	ENSMUST00000037552	Lepr	ENSMUSG00000057722	protein_coding	exon	chr4-101717404-101717938	chr4-101694323-101694873	22530
chr17-15137142-15137884	0.00964578	-0.349381	0.123	0.25	1	ENSMUST00000187199	Gm28869	ENSMUSG00000101556	processed_transcript	exon	chr17-15074417-15074993	chr17-15137142-15137884	62148
chr5-151065179-151065655	0.00965153	-0.382465	0.057	0.152	1	ENSMUST00000141117	Stard13	ENSMUSG00000016128	protein_coding	gap	chr5-151063657-151073300	chr5-151065179-151065655	0
chr17-35021919-35022351	0.00965879	-0.338298	0.068	0.162	1	ENSMUST00000172499	Vwa7	ENSMUSG00000007030	protein_coding	gap	chr17-35021628-35022647	chr17-35021919-35022351	0
chr12-111894078-111894449	0.00966191	-0.331422	0.068	0.164	1	ENSMUST00000163747	Ppp1r13b	ENSMUSG00000021285	protein_coding	gap	chr12-111872434-111907861	chr12-111894078-111894449	0
chr2-32681814-32682293	0.00968081	-0.172985	0.023	0.053	1	ENSMUST00000167841	Eng	ENSMUSG00000026814	protein_coding	utr	chr2-32681562-32682669	chr2-32681814-32682293	0
chr16-91441469-91441753	0.00968458	0.138246	0.053	0.035	1	ENSMUST00000023691	Il10rb	ENSMUSG00000022969	protein_coding	utr	chr16-91425124-91425834	chr16-91441469-91441753	15634
chr19-42086054-42086477	0.00972331	0.15777	0.08	0.056	1	ENSMUST00000051772	Morn4	ENSMUSG00000049670	protein_coding	utr	chr19-42086197-42086370	chr19-42086054-42086477	0
chr7-45454816-45455511	0.00974339	0.129959	0.125	0.098	1	ENSMUST00000107766	Gys1	ENSMUSG00000003865	protein_coding	cds	chr7-45455041-45455367	chr7-45454816-45455511	0
chr12-81807900-81808104	0.00975407	-0.343596	0.032	0.096	1	ENSMUST00000035987	Map3k9	ENSMUSG00000042724	protein_coding	exon	chr12-81780490-81781170	chr12-81807900-81808104	26729
chr1-172828884-172829365	0.009796	-0.360264	0.022	0.088	1	ENSMUST00000194251	Crp	ENSMUSG00000037942	protein_coding	gap	chr1-172698201-172831282	chr1-172828884-172829365	0
chr5-113307127-113307556	0.00979808	0.173894	0.06	0.04	1	ENSMUST00000154248	Sgsm1	ENSMUSG00000042216	protein_coding	gap	chr5-113288900-113310547	chr5-113307127-113307556	0
chr8-8737127-8737534	0.0098071	-0.27153	0.017	0.058	1	ENSMUST00000048545	Arglu1	ENSMUSG00000040459	protein_coding	exon	chr8-8689977-8690537	chr8-8737127-8737534	46589
chr18-61804824-61806394	0.0098224	0.183882	0.125	0.098	1	ENSMUST00000166783	Ablim3	ENSMUSG00000032735	protein_coding	cds	chr18-61806387-61806447	chr18-61804824-61806394	0
chrX-98889955-98891202	0.00989763	-0.263862	0.09	0.192	1	ENSMUST00000142267	Ophn1	ENSMUSG00000031214	protein_coding	cds	chrX-98890082-98890235	chrX-98889955-98891202	0
chr7-121033861-121035654	0.00989917	-0.19206	0.193	0.354	1	ENSMUST00000065740	Gm9905	ENSMUSG00000053358	protein_coding	cds	chr7-121034391-121035056	chr7-121033861-121035654	0
chr3-95229395-95231521	0.00991565	-0.180979	0.095	0.217	1	ENSMUST00000149804	Cdc42se1	ENSMUSG00000046722	protein_coding	gap	chr3-95228866-95231784	chr3-95229395-95231521	0
chr8-118393816-118394496	0.00994347	0.148676	0.117	0.086	1	ENSMUST00000148836	Cdh13	ENSMUSG00000031841	protein_coding	gap	chr8-118283899-118505603	chr8-118393816-118394496	0
chr15-82376630-82377116	0.00997968	-0.231757	0.035	0.109	1	ENSMUST00000023083	Cyp2d22	ENSMUSG00000061740	protein_coding	gap	chr15-82376042-82380071	chr15-82376630-82377116	0
chr19-25360198-25361519	0.00999284	-0.158927	0.023	0.071	1	ENSMUST00000049400	Kank1	ENSMUSG00000032702	protein_coding	gap	chr19-25318433-25378410	chr19-25360198-25361519	0
chr8-111490941-111491421	0.0100123	-0.257219	0.013	0.056	1	ENSMUST00000038193	Wdr59	ENSMUSG00000031959	protein_coding	gap	chr8-111490449-111492694	chr8-111490941-111491421	0
chr3-95216791-95218302	0.0100153	-0.181624	0.245	0.394	1	ENSMUST00000136139	Gabpb2	ENSMUSG00000038766	protein_coding	utr	chr3-95217589-95217916	chr3-95216791-95218302	0
chr11-78566454-78567241	0.0100545	-0.319646	0.06	0.154	1	ENSMUST00000142739	Nlk	ENSMUSG00000017376	protein_coding	utr	chr11-78567168-78568920	chr11-78566454-78567241	0
chr14-120532008-120533001	0.0100583	0.184605	0.172	0.129	1	ENSMUST00000156694	Rap2a	ENSMUSG00000051615	protein_coding	utr	chr14-120503839-120507194	chr14-120532008-120533001	24813
chr10-121613314-121614206	0.0100673	-0.307881	0.05	0.134	1	ENSMUST00000039810	Xpot	ENSMUSG00000034667	protein_coding	cds	chr10-121613487-121613660	chr10-121613314-121614206	0
chr13-60743774-60744480	0.0100749	-0.201454	0.045	0.104	1	ENSMUST00000077453	Dapk1	ENSMUSG00000021559	protein_coding	gap	chr13-60740133-60748100	chr13-60743774-60744480	0
chrX-96107320-96108222	0.0100821	-0.194105	0.042	0.091	1	ENSMUST00000149985	Msn	ENSMUSG00000031207	protein_coding	gap	chrX-96096244-96141864	chrX-96107320-96108222	0
chr1-135793368-135794924	0.0100836	-0.239249	0.048	0.139	1	ENSMUST00000132795	Tnni1	ENSMUSG00000026418	protein_coding	gap	chr1-135783431-135799972	chr1-135793368-135794924	0
chr18-75654659-75655230	0.0100873	0.184593	0.077	0.048	1	ENSMUST00000165559	Ctif	ENSMUSG00000052928	protein_coding	gap	chr18-75637339-75697391	chr18-75654659-75655230	0
chr4-121028684-121029316	0.0100982	-0.143617	0.012	0.071	1	ENSMUST00000030372	Col9a2	ENSMUSG00000028626	protein_coding	exon	chr4-121039385-121039786	chr4-121028684-121029316	10068
chr14-78687310-78688083	0.0101329	-0.25894	0.028	0.111	1	ENSMUST00000074729	Dgkh	ENSMUSG00000034731	protein_coding	gap	chr14-78653797-78724906	chr14-78687310-78688083	0
chr7-25204806-25206757	0.0101645	-0.165598	0.08	0.202	1	ENSMUST00000058702	Dedd2	ENSMUSG00000054499	protein_coding	gap	chr7-25203932-25211148	chr7-25204806-25206757	0
chr5-35700778-35701615	0.0101736	0.100879	0.073	0.071	1	ENSMUST00000151555	Sh3tc1	ENSMUSG00000036553	protein_coding	gap	chr5-35700708-35701850	chr5-35700778-35701615	0
chr4-45749252-45749891	0.0101923	-0.256226	0.023	0.078	1	ENSMUST00000147231	Gm12409	ENSMUSG00000085876	processed_transcript	exon	chr4-45762377-45762912	chr4-45749252-45749891	12485
chr11-106957109-106957818	0.0102089	-0.303005	0.083	0.207	1	ENSMUST00000150366	Gm11707	ENSMUSG00000086481	lincRNA	exon	chr11-106972058-106972507	chr11-106957109-106957818	14239
chr5-112453110-112453404	0.0102241	-0.248332	0.015	0.056	1	ENSMUST00000079491	Sez6l	ENSMUSG00000058153	protein_coding	gap	chr5-112441011-112461146	chr5-112453110-112453404	0
chrX-53669918-53671054	0.0102382	-0.208589	0.067	0.157	1	ENSMUST00000088778	Cxx1b	ENSMUSG00000067924	protein_coding	cds	chrX-53669957-53670298	chrX-53669918-53671054	0
chr16-93807812-93808537	0.010268	0.130478	0.06	0.035	1	ENSMUST00000045004	Dopey2	ENSMUSG00000022946	protein_coding	cds	chr16-93807818-93807979	chr16-93807812-93808537	0
chr4-117101212-117101503	0.0102693	-0.189609	0.013	0.056	1	ENSMUST00000144620	Ptch2	ENSMUSG00000028681	protein_coding	gap	chr4-117097040-117104732	chr4-117101212-117101503	0
chr14-59200499-59202123	0.0102763	-0.181839	0.223	0.366	1	ENSMUST00000174009	Rcbtb1	ENSMUSG00000035469	protein_coding	utr	chr14-59201234-59201584	chr14-59200499-59202123	0
chr19-40678281-40680023	0.0102979	-0.194877	0.095	0.215	1	ENSMUST00000156598	Entpd1	ENSMUSG00000048120	protein_coding	gap	chr19-40659901-40711162	chr19-40678281-40680023	0
chr3-149203148-149203765	0.0103001	-0.369673	0.055	0.141	1	ENSMUST00000180599	Gm10287	ENSMUSG00000070342	lincRNA	exon	chr3-149221687-149225745	chr3-149203148-149203765	17921
chr8-25331025-25331710	0.0103298	0.151257	0.068	0.053	1	ENSMUST00000084030	Tacc1	ENSMUSG00000065954	protein_coding	exon	chr8-25201122-25201449	chr8-25331025-25331710	129575
chr2-20649394-20650195	0.0103308	-0.302395	0.067	0.146	1	ENSMUST00000146881	Etl4	ENSMUSG00000036617	protein_coding	gap	chr2-20530243-20661897	chr2-20649394-20650195	0
chr7-45522996-45524012	0.0104316	0.128554	0.098	0.068	1	ENSMUST00000167273	Ppp1r15a	ENSMUSG00000040435	protein_coding	cds	chr7-45523739-45525382	chr7-45522996-45524012	0
chr1-179866394-179866817	0.0104488	-0.374141	0.06	0.159	1	ENSMUST00000097454	Gm10518	ENSMUSG00000073486	protein_coding	utr	chr1-179803926-179804676	chr1-179866394-179866817	61717
chr18-38008773-38009255	0.0104546	0.176863	0.117	0.088	1	ENSMUST00000042944	Arap3	ENSMUSG00000024451	protein_coding	exon	chr18-37997533-37997574	chr18-38008773-38009255	11198
chr11-68285710-68286858	0.0104854	-0.254772	0.087	0.169	1	ENSMUST00000108674	Ntn1	ENSMUSG00000020902	protein_coding	gap	chr11-68277612-68385102	chr11-68285710-68286858	0
chr13-21918693-21919681	0.010494	-0.183744	0.033	0.093	1	ENSMUST00000176511	Zfp184	ENSMUSG00000006720	protein_coding	exon	chr13-21945094-21945199	chr13-21918693-21919681	25412
chr5-135465752-135466159	0.0105044	-0.222499	0.03	0.076	1	ENSMUST00000060311	Hip1	ENSMUSG00000039959	protein_coding	gap	chr5-135460471-135544936	chr5-135465752-135466159	0
chr17-83275856-83278915	0.010511	-0.162784	0.205	0.346	1	ENSMUST00000170794	Pkdcc	ENSMUSG00000024247	protein_coding	utr	chr17-83224278-83225070	chr17-83275856-83278915	50785
chr14-55853540-55855514	0.010516	-0.250759	0.1	0.21	1	ENSMUST00000168479	Nynrin	ENSMUSG00000075592	protein_coding	cds	chr14-55854229-55854426	chr14-55853540-55855514	0
chr2-75208753-75209626	0.0105246	0.205288	0.158	0.126	1	ENSMUST00000139823	A330043C09Rik	ENSMUSG00000086044	lincRNA	exon	chr2-75177522-75177658	chr2-75208753-75209626	31094
chr15-10746630-10746886	0.0105272	-0.288897	0.017	0.063	1	ENSMUST00000180604	4930556M19Rik	ENSMUSG00000097058	lincRNA	gap	chr15-10716775-10767434	chr15-10746630-10746886	0
chr10-70244524-70245760	0.0105333	-0.246807	0.06	0.146	1	ENSMUST00000046807	Slc16a9	ENSMUSG00000037762	protein_coding	utr	chr10-70245100-70245378	chr10-70244524-70245760	0
chr15-73045166-73045458	0.0105398	-0.268484	0.025	0.068	1	ENSMUST00000170633	Trappc9	ENSMUSG00000047921	protein_coding	gap	chr15-73042204-73050594	chr15-73045166-73045458	0
chr19-5463794-5464073	0.0105508	-0.2132	0.028	0.091	1	ENSMUST00000025847	Fibp	ENSMUSG00000024911	protein_coding	cds	chr19-5463787-5463850	chr19-5463794-5464073	0
chr8-8334331-8334964	0.0105588	-0.246803	0.025	0.086	1	ENSMUST00000001319	Efnb2	ENSMUSG00000001300	protein_coding	utr	chr8-8617434-8620587	chr8-8334331-8334964	282469
chr12-81690813-81691654	0.010561	0.171853	0.138	0.111	1	ENSMUST00000035987	Map3k9	ENSMUSG00000042724	protein_coding	utr	chr12-81714950-81722038	chr12-81690813-81691654	23295
chr3-37974942-37975430	0.0105622	-0.237885	0.018	0.081	1	ENSMUST00000099128	Gm5148	ENSMUSG00000058174	protein_coding	exon	chr3-37724203-37724490	chr3-37974942-37975430	250451
chr11-107348001-107348402	0.0105966	-0.380991	0.032	0.111	1	ENSMUST00000134763	Pitpnc1	ENSMUSG00000040430	protein_coding	utr	chr11-107348089-107348130	chr11-107348001-107348402	0
chr17-31636318-31637770	0.0106021	-0.219988	0.108	0.225	1	ENSMUST00000155814	Cbs	ENSMUSG00000024039	protein_coding	utr	chr17-31636658-31636790	chr17-31636318-31637770	0
chr3-58163589-58164118	0.0106996	0.139941	0.053	0.028	1	ENSMUST00000188418	1700007F19Rik	ENSMUSG00000100666	lincRNA	gap	chr3-58163554-58163761	chr3-58163589-58164118	0
chr17-44193008-44193391	0.0107452	-0.3172	0.033	0.101	1	ENSMUST00000024755	Clic5	ENSMUSG00000023959	protein_coding	gap	chr17-44188962-44237132	chr17-44193008-44193391	0
chr5-147893942-147895062	0.010775	-0.181914	0.15	0.316	1	ENSMUST00000138244	Slc46a3	ENSMUSG00000029650	protein_coding	cds	chr5-147893881-147894021	chr5-147893942-147895062	0
chr17-86814323-86814631	0.0107793	-0.232427	0.028	0.076	1	ENSMUST00000024954	Epas1	ENSMUSG00000024140	protein_coding	gap	chr17-86809790-86818354	chr17-86814323-86814631	0
chr5-134887836-134888108	0.0108045	-0.331371	0.073	0.149	1	ENSMUST00000047305	Wbscr28	ENSMUSG00000040576	protein_coding	utr	chr5-134901594-134901861	chr5-134887836-134888108	13485
chr4-130167741-130168664	0.010814	-0.283378	0.083	0.192	1	ENSMUST00000175992	Tinagl1	ENSMUSG00000028776	protein_coding	cds	chr4-130167930-130168053	chr4-130167741-130168664	0
chr12-117430647-117431211	0.0108184	-0.296795	0.025	0.088	1	ENSMUST00000109691	Rapgef5	ENSMUSG00000041992	protein_coding	exon	chr12-117516479-117516903	chr12-117430647-117431211	85267
chr8-126805341-126806486	0.0108328	-0.183385	0.275	0.429	1	ENSMUST00000179857	Tomm20	ENSMUSG00000093904	protein_coding	utr	chr8-126930664-126935014	chr8-126805341-126806486	124177
chr2-145797785-145798124	0.010848	-0.358401	0.038	0.111	1	ENSMUST00000150449	Rin2	ENSMUSG00000001768	protein_coding	gap	chr2-145786415-145822264	chr2-145797785-145798124	0
chr11-103141933-103142968	0.0108532	-0.21403	0.078	0.189	1	ENSMUST00000062530	Hexim2	ENSMUSG00000043372	protein_coding	utr	chr11-103139066-103139876	chr11-103141933-103142968	2056
chr1-59483502-59484180	0.0108765	-0.167694	0.028	0.088	1	ENSMUST00000114246	Fzd7	ENSMUSG00000041075	protein_coding	cds	chr1-59482960-59484678	chr1-59483502-59484180	0
chr5-30960923-30962139	0.010895	-0.187041	0.078	0.187	1	ENSMUST00000074840	Preb	ENSMUSG00000045302	protein_coding	exon	chr5-30959971-30960330	chr5-30960923-30962139	592
chr19-46055845-46057597	0.0109157	-0.189498	0.243	0.399	1	ENSMUST00000111899	Pprc1	ENSMUSG00000055491	protein_coding	cds	chr19-46056591-46056743	chr19-46055845-46057597	0
chr2-146633464-146633970	0.0109356	-0.184108	0.017	0.056	1	ENSMUST00000147212	4933406D12Rik	ENSMUSG00000085796	lincRNA	exon	chr2-146545684-146546108	chr2-146633464-146633970	87355
chr9-7867940-7868317	0.0109601	-0.168619	0.035	0.096	1	ENSMUST00000161099	Birc3	ENSMUSG00000032000	protein_coding	gap	chr9-7866518-7872822	chr9-7867940-7868317	0
chr13-110643028-110644094	0.0109703	-0.219825	0.038	0.106	1	ENSMUST00000022212	Plk2	ENSMUSG00000021701	protein_coding	utr	chr13-110400225-110400844	chr13-110643028-110644094	242183
chr14-55825304-55826276	0.0109868	-0.179542	0.022	0.078	1	ENSMUST00000172271	Nfatc4	ENSMUSG00000023411	protein_coding	cds	chr14-55826158-55827253	chr14-55825304-55826276	0
chr2-166994798-166996784	0.010989	-0.167215	0.27	0.434	1	ENSMUST00000109238	Stau1	ENSMUSG00000039536	protein_coding	utr	chr2-166996034-166996265	chr2-166994798-166996784	0
chr1-36569794-36570278	0.0110211	-0.300947	0.035	0.124	1	ENSMUST00000194839	Fam178b	ENSMUSG00000046337	protein_coding	gap	chr1-36564909-36578518	chr1-36569794-36570278	0
chr14-20106157-20106817	0.0110234	-0.339536	0.048	0.116	1	ENSMUST00000059666	Saysd1	ENSMUSG00000045107	protein_coding	exon	chr14-20082878-20083172	chr14-20106157-20106817	22984
chr16-55894544-55896017	0.0110544	-0.189575	0.197	0.343	1	ENSMUST00000099705	Nxpe3	ENSMUSG00000075033	protein_coding	utr	chr16-55894928-55895279	chr16-55894544-55896017	0
chr4-126532720-126533859	0.0110912	-0.224705	0.073	0.187	1	ENSMUST00000084289	Ago4	ENSMUSG00000042500	protein_coding	cds	chr4-126533185-126533203	chr4-126532720-126533859	0
chr9-49485131-49486441	0.0110966	-0.200858	0.147	0.258	1	ENSMUST00000055096	Ttc12	ENSMUSG00000040219	protein_coding	utr	chr9-49486146-49486225	chr9-49485131-49486441	0
chr1-34388884-34389950	0.0110969	-0.294244	0.112	0.222	1	ENSMUST00000192173	mmu-mir-5103	ENSMUSG00000102336	lincRNA	exon	chr1-34427002-34433264	chr1-34388884-34389950	37051
chr16-13158746-13160675	0.0111072	-0.190285	0.192	0.331	1	ENSMUST00000129049	Ercc4	ENSMUSG00000022545	protein_coding	utr	chr16-13147526-13150617	chr16-13158746-13160675	8128
chr15-10738365-10739112	0.0111785	-0.273241	0.022	0.078	1	ENSMUST00000180604	4930556M19Rik	ENSMUSG00000097058	lincRNA	gap	chr15-10716775-10767434	chr15-10738365-10739112	0
chr18-4737542-4738375	0.0112563	-0.2319	0.07	0.134	1	ENSMUST00000037029	9430020K01Rik	ENSMUSG00000033960	protein_coding	utr	chr18-4680261-4682868	chr18-4737542-4738375	54673
chr3-46447091-46448302	0.0112744	0.136189	0.063	0.043	1	ENSMUST00000195537	Pabpc4l	ENSMUSG00000090919	protein_coding	cds	chr3-46447056-46447207	chr3-46447091-46448302	0
chr8-110949856-110950666	0.0112937	-0.192901	0.032	0.104	1	ENSMUST00000141464	St3gal2	ENSMUSG00000031749	protein_coding	gap	chr8-110932006-110956757	chr8-110949856-110950666	0
chr3-121814377-121815674	0.0112974	-0.207603	0.195	0.336	1	ENSMUST00000029770	Abcd3	ENSMUSG00000028127	protein_coding	cds	chr3-121815009-121815118	chr3-121814377-121815674	0
chr13-69739024-69740655	0.0113381	0.17124	0.137	0.111	1	ENSMUST00000065118	Ube2ql1	ENSMUSG00000052981	protein_coding	cds	chr13-69738558-69739340	chr13-69739024-69740655	0
chr6-52801835-52802551	0.011363	-0.27568	0.048	0.129	1	ENSMUST00000136250	Jazf1	ENSMUSG00000063568	protein_coding	gap	chr6-52777705-52812102	chr6-52801835-52802551	0
chr17-56861103-56861616	0.0113678	0.20569	0.16	0.114	1	ENSMUST00000043062	Acsbg2	ENSMUSG00000024207	protein_coding	cds	chr17-56861539-56861622	chr17-56861103-56861616	0
chr1-4617472-4617992	0.0113842	-0.349483	0.053	0.136	1	ENSMUST00000195771	RP23-37D15.1	ENSMUSG00000104328	lincRNA	exon	chr1-4585937-4586252	chr1-4617472-4617992	31219
chr16-90625370-90626068	0.0113988	-0.319843	0.06	0.149	1	ENSMUST00000183621	1110008E08Rik	ENSMUSG00000046119	lincRNA	exon	chr16-90554164-90554886	chr16-90625370-90626068	70483
chr3-105019780-105020594	0.0114105	-0.245634	0.063	0.131	1	ENSMUST00000098763	Cttnbp2nl	ENSMUSG00000062127	protein_coding	gap	chr3-105011424-105032652	chr3-105019780-105020594	0
chr8-83996323-83998861	0.0114152	-0.139003	0.355	0.505	1	ENSMUST00000095228	Samd1	ENSMUSG00000079003	protein_coding	cds	chr8-83997672-83998565	chr8-83996323-83998861	0
chr2-4558846-4560794	0.0114214	-0.235985	0.145	0.298	1	ENSMUST00000177457	Frmd4a	ENSMUSG00000026657	protein_coding	cds	chr2-4560214-4560290	chr2-4558846-4560794	0
chr1-183438760-183439456	0.011457	0.126943	0.103	0.088	1	ENSMUST00000192527	Hhipl2	ENSMUSG00000053461	protein_coding	utr	chr1-183436481-183436808	chr1-183438760-183439456	1951
chr16-15958470-15959083	0.0114752	-0.24026	0.05	0.136	1	ENSMUST00000040248	Spidr	ENSMUSG00000041974	protein_coding	gap	chr16-15936694-15966601	chr16-15958470-15959083	0
chr3-136704532-136704801	0.0114806	-0.323577	0.032	0.111	1	ENSMUST00000124206	Ppp3ca	ENSMUSG00000028161	protein_coding	gap	chr3-136670902-136780461	chr3-136704532-136704801	0
chr18-47149127-47150103	0.011578	-0.269729	0.062	0.129	1	ENSMUST00000049388	Commd10	ENSMUSG00000042705	protein_coding	utr	chr18-47087067-47087992	chr18-47149127-47150103	61134
chr6-124919357-124920516	0.01158	0.11925	0.398	0.417	1	ENSMUST00000069553	A230083G16Rik	ENSMUSG00000055818	protein_coding	gap	chr6-124917183-124925173	chr6-124919357-124920516	0
chr10-59978903-59979431	0.0115876	-0.239164	0.082	0.159	1	ENSMUST00000182898	Anapc16	ENSMUSG00000020107	protein_coding	utr	chr10-59987409-59988722	chr10-59978903-59979431	7977
chr16-33776743-33777795	0.011597	0.137902	0.075	0.048	1	ENSMUST00000152782	Heg1	ENSMUSG00000075254	protein_coding	utr	chr16-33766811-33771576	chr16-33776743-33777795	5166
chr16-38625523-38625722	0.0116119	-0.238259	0.013	0.051	1	ENSMUST00000023487	Arhgap31	ENSMUSG00000022799	protein_coding	cds	chr16-38625551-38625633	chr16-38625523-38625722	0
chr6-29270773-29271412	0.0116303	-0.241419	0.062	0.174	1	ENSMUST00000115289	Hilpda	ENSMUSG00000043421	protein_coding	exon	chr6-29272488-29272608	chr6-29270773-29271412	1075
chr3-134235656-134236584	0.0116852	-0.237464	0.05	0.126	1	ENSMUST00000181904	Cxxc4	ENSMUSG00000044365	protein_coding	utr	chr3-134236491-134236686	chr3-134235656-134236584	0
chr6-39295348-39296746	0.0116894	0.158042	0.083	0.058	1	ENSMUST00000090243	Slc37a3	ENSMUSG00000029924	protein_coding	utr	chr6-39334770-39337191	chr6-39295348-39296746	38023
chr1-143701691-143703319	0.0117067	-0.174512	0.217	0.361	1	ENSMUST00000159794	Cdc73	ENSMUSG00000026361	protein_coding	cds	chr1-143701979-143702200	chr1-143701691-143703319	0
chr5-105975412-105976065	0.0117122	-0.315975	0.043	0.134	1	ENSMUST00000031227	Zfp326	ENSMUSG00000029290	protein_coding	utr	chr5-105915010-105915818	chr5-105975412-105976065	59593
chr5-143634590-143634961	0.011786	-0.213156	0.013	0.061	1	ENSMUST00000177196	Cyth3	ENSMUSG00000018001	protein_coding	gap	chr5-143622674-143650526	chr5-143634590-143634961	0
chr9-103053870-103054193	0.011788	-0.286535	0.022	0.063	1	ENSMUST00000188664	Slco2a1	ENSMUSG00000032548	protein_coding	gap	chr9-103050307-103067824	chr9-103053870-103054193	0
chr1-59797593-59798150	0.0118033	-0.313793	0.018	0.078	1	ENSMUST00000087435	Bmpr2	ENSMUSG00000067336	protein_coding	gap	chr1-59764729-59813587	chr1-59797593-59798150	0
chr18-80682810-80683172	0.0118063	-0.24421	0.025	0.098	1	ENSMUST00000170905	Nfatc1	ENSMUSG00000033016	protein_coding	gap	chr18-80682319-80697554	chr18-80682810-80683172	0
chr9-44129617-44131167	0.0118103	-0.238063	0.217	0.364	1	ENSMUST00000180670	Gm10687	ENSMUSG00000097617	lincRNA	gap	chr9-44125294-44134360	chr9-44129617-44131167	0
chr5-143669400-143670181	0.0118164	-0.198856	0.03	0.091	1	ENSMUST00000177281	Cyth3	ENSMUSG00000018001	protein_coding	gap	chr5-143636553-143684395	chr5-143669400-143670181	0
chr17-5798169-5798778	0.0118437	-0.1885	0.048	0.157	1	ENSMUST00000180924	3300005D01Rik	ENSMUSG00000096965	lincRNA	gap	chr17-5798761-5801198	chr17-5798169-5798778	0
chr11-70585459-70585707	0.0118515	0.132385	0.05	0.033	1	ENSMUST00000102559	Mink1	ENSMUSG00000020827	protein_coding	gap	chr11-70563127-70597167	chr11-70585459-70585707	0
chr7-111062185-111063894	0.0118644	0.108471	0.077	0.048	1	ENSMUST00000005749	Ctr9	ENSMUSG00000005609	protein_coding	utr	chr7-111055786-111056377	chr7-111062185-111063894	5807
chr3-8510193-8511402	0.0118983	-0.255979	0.148	0.23	1	ENSMUST00000194905	Stmn2	ENSMUSG00000027500	protein_coding	gap	chr3-8509631-8541840	chr3-8510193-8511402	0
chr7-126847396-126849198	0.01194	-0.163333	0.04	0.104	1	ENSMUST00000176771	Doc2a	ENSMUSG00000052301	protein_coding	cds	chr7-126848797-126848862	chr7-126847396-126849198	0
chr6-146530177-146531191	0.0119401	-0.289425	0.06	0.157	1	ENSMUST00000139979	Asun	ENSMUSG00000040250	protein_coding	utr	chr6-146549632-146549945	chr6-146530177-146531191	18440
chr10-121461306-121461894	0.0119658	-0.279269	0.067	0.162	1	ENSMUST00000026902	Rassf3	ENSMUSG00000025795	protein_coding	gap	chr10-121417193-121476002	chr10-121461306-121461894	0
chr14-87415510-87417703	0.0119696	-0.154865	0.317	0.465	1	ENSMUST00000169504	Tdrd3	ENSMUSG00000022019	protein_coding	cds	chr14-87416808-87416848	chr14-87415510-87417703	0
chr1-74303447-74304789	0.0119729	-0.234365	0.108	0.237	1	ENSMUST00000141560	Tmbim1	ENSMUSG00000006301	protein_coding	utr	chr1-74303775-74304120	chr1-74303447-74304789	0
chr5-134555437-134555814	0.0120088	-0.275611	0.065	0.162	1	ENSMUST00000149604	Syna	ENSMUSG00000085957	protein_coding	utr	chr5-134557254-134558239	chr5-134555437-134555814	1439
chr4-95156558-95157207	0.0120128	-0.270104	0.067	0.164	1	ENSMUST00000136941	Gm12708	ENSMUSG00000084918	lincRNA	exon	chr4-95193313-95193404	chr4-95156558-95157207	36105
chr16-87127859-87128649	0.0120157	-0.367032	0.113	0.23	1	ENSMUST00000054442	N6amt1	ENSMUSG00000044442	protein_coding	exon	chr16-87354185-87354386	chr16-87127859-87128649	225535
chr10-70119757-70121192	0.0120401	-0.179271	0.032	0.093	1	ENSMUST00000147545	Ccdc6	ENSMUSG00000048701	protein_coding	gap	chr10-70097582-70142578	chr10-70119757-70121192	0
chr11-103118511-103119180	0.0120552	0.174599	0.157	0.104	1	ENSMUST00000053063	Hexim1	ENSMUSG00000048878	protein_coding	utr	chr11-103117993-103119725	chr11-103118511-103119180	0
chr3-38360645-38361129	0.0120584	-0.255951	0.013	0.051	1	ENSMUST00000120875	Ankrd50	ENSMUSG00000044864	protein_coding	utr	chr3-38449261-38452416	chr3-38360645-38361129	88131
chr3-88081446-88083075	0.0121551	-0.198722	0.078	0.184	1	ENSMUST00000195465	Iqgap3	ENSMUSG00000028068	protein_coding	cds	chr3-88082056-88082092	chr3-88081446-88083075	0
chr15-31381940-31382500	0.012156	-0.25303	0.027	0.078	1	ENSMUST00000110410	Ankrd33b	ENSMUSG00000022237	protein_coding	exon	chr15-31367066-31367759	chr15-31381940-31382500	14180
chr7-46393652-46394050	0.0121789	-0.165731	0.012	0.083	1	ENSMUST00000025202	Kcnc1	ENSMUSG00000058975	protein_coding	exon	chr7-46396497-46398247	chr7-46393652-46394050	2446
chr11-96426781-96427098	0.0121836	-0.293505	0.02	0.068	1	ENSMUST00000153012	Gm11529	ENSMUSG00000075586	processed_transcript	exon	chr11-96448323-96448457	chr11-96426781-96427098	21224
chr7-105735725-105737558	0.0121901	-0.18027	0.225	0.391	1	ENSMUST00000163389	Ilk	ENSMUSG00000030890	protein_coding	cds	chr7-105737149-105737237	chr7-105735725-105737558	0
chr15-40032128-40032407	0.0122807	0.227813	0.057	0.025	1	ENSMUST00000110305	Lrp12	ENSMUSG00000022305	protein_coding	exon	chr15-39943604-39943994	chr15-40032128-40032407	88133
chr11-49734589-49735192	0.0122955	-0.239215	0.022	0.086	1	ENSMUST00000145353	Cnot6	ENSMUSG00000020362	protein_coding	exon	chr11-49712354-49712723	chr11-49734589-49735192	21865
chr8-105965107-105966377	0.0123361	-0.220479	0.142	0.285	1	ENSMUST00000116429	Slc12a4	ENSMUSG00000017765	protein_coding	cds	chr8-105965925-105966039	chr8-105965107-105966377	0
chr18-11915038-11916087	0.0123402	-0.248767	0.088	0.207	1	ENSMUST00000171109	Cables1	ENSMUSG00000040957	protein_coding	gap	chr18-11906003-11923359	chr18-11915038-11916087	0
chr3-89491421-89491964	0.0123681	0.233973	0.137	0.093	1	ENSMUST00000029564	Pmvk	ENSMUSG00000027952	protein_coding	utr	chr3-89468651-89469013	chr3-89491421-89491964	22407
chr8-22688179-22688533	0.0123803	-0.244099	0.015	0.061	1	ENSMUST00000150259	Ikbkb	ENSMUSG00000031537	protein_coding	gap	chr8-22682815-22691057	chr8-22688179-22688533	0
chr15-59665262-59665969	0.0124058	0.109133	0.098	0.093	1	ENSMUST00000067543	Trib1	ENSMUSG00000032501	protein_coding	utr	chr15-59654702-59656550	chr15-59665262-59665969	8711
chr13-97524905-97525198	0.0124068	-0.260568	0.01	0.053	1	ENSMUST00000179324	Lincenc1	ENSMUSG00000078952	lincRNA	exon	chr13-97494405-97497007	chr13-97524905-97525198	27897
chr12-15776719-15777401	0.0124138	-0.288467	0.027	0.086	1	ENSMUST00000020922	Trib2	ENSMUSG00000020601	protein_coding	utr	chr12-15791727-15793607	chr12-15776719-15777401	14325
chr1-184781845-184782529	0.0124293	-0.228284	0.027	0.096	1	ENSMUST00000048462	Marc1	ENSMUSG00000026621	protein_coding	utr	chr1-184786767-184787714	chr1-184781845-184782529	4237
chr2-93891338-93892237	0.0124329	-0.361722	0.062	0.146	1	ENSMUST00000099690	Accsl	ENSMUSG00000075023	protein_coding	exon	chr2-93869022-93869157	chr2-93891338-93892237	22180
chr8-84814940-84815914	0.0124787	0.148298	0.34	0.328	1	ENSMUST00000065539	Dand5	ENSMUSG00000053226	protein_coding	utr	chr8-84815405-84816287	chr8-84814940-84815914	0
chr13-45971058-45971481	0.0125025	-0.296602	0.052	0.144	1	ENSMUST00000038032	5033430I15Rik	ENSMUSG00000038152	lincRNA	exon	chr13-45965911-45966508	chr13-45971058-45971481	4549
chr1-58726955-58727615	0.0125283	-0.229533	0.057	0.152	1	ENSMUST00000164900	Cflar	ENSMUSG00000026031	protein_coding	gap	chr1-58726733-58731151	chr1-58726955-58727615	0
chr7-98903538-98904322	0.0125651	-0.202391	0.023	0.071	1	ENSMUST00000037968	Uvrag	ENSMUSG00000035354	protein_coding	gap	chr7-98888593-98906491	chr7-98903538-98904322	0
chr5-103758538-103758765	0.012588	-0.165002	0.015	0.063	1	ENSMUST00000153165	Aff1	ENSMUSG00000029313	protein_coding	gap	chr5-103754746-103783123	chr5-103758538-103758765	0
chr8-111625724-111626244	0.0125921	0.106946	0.068	0.058	1	ENSMUST00000171182	Znrf1	ENSMUSG00000033545	protein_coding	utr	chr8-111621654-111626030	chr8-111625724-111626244	0
chr1-185587416-185588622	0.0126089	-0.276585	0.043	0.134	1	ENSMUST00000061093	Slc30a10	ENSMUSG00000026614	protein_coding	utr	chr1-185464556-185468762	chr1-185587416-185588622	118653
chr9-116639728-116640469	0.0126115	0.186831	0.073	0.048	1	ENSMUST00000174868	Rbms3	ENSMUSG00000039607	protein_coding	gap	chr9-116636480-116678646	chr9-116639728-116640469	0
chr8-94999978-95001031	0.0126265	-0.262131	0.12	0.237	1	ENSMUST00000179619	Gpr56	ENSMUSG00000031785	protein_coding	gap	chr8-94977418-95002438	chr8-94999978-95001031	0
chr16-34371966-34372858	0.0126496	-0.281112	0.178	0.321	1	ENSMUST00000151491	Kalrn	ENSMUSG00000061751	protein_coding	gap	chr16-34361010-34385284	chr16-34371966-34372858	0
chr16-8737527-8739320	0.0126497	-0.18297	0.157	0.313	1	ENSMUST00000161046	Usp7	ENSMUSG00000022710	protein_coding	cds	chr16-8738204-8738285	chr16-8737527-8739320	0
chr14-25645699-25646670	0.0126513	-0.23649	0.167	0.303	1	ENSMUST00000162645	Zmiz1	ENSMUSG00000007817	protein_coding	cds	chr14-25645659-25645857	chr14-25645699-25646670	0
chr10-77251227-77253149	0.012652	0.106517	0.158	0.159	1	ENSMUST00000105408	Gm10941	ENSMUSG00000078444	protein_coding	utr	chr10-77257776-77257986	chr10-77251227-77253149	4626
chr7-34255095-34255373	0.0126524	0.167886	0.067	0.043	1	ENSMUST00000108074	4931406P16Rik	ENSMUSG00000066571	protein_coding	gap	chr7-34254085-34256411	chr7-34255095-34255373	0
chr1-152585412-152585887	0.0126902	-0.26056	0.043	0.121	1	ENSMUST00000149536	Rgl1	ENSMUSG00000026482	protein_coding	gap	chr1-152571676-152586406	chr1-152585412-152585887	0
chr2-129864839-129865236	0.0126942	0.138489	0.053	0.038	1	ENSMUST00000166282	Stk35	ENSMUSG00000037885	protein_coding	utr	chr2-129827851-129832287	chr2-129864839-129865236	32551
chr1-39713420-39714977	0.0127016	-0.23641	0.168	0.326	1	ENSMUST00000151913	Rfx8	ENSMUSG00000057173	protein_coding	gap	chr1-39711440-39718417	chr1-39713420-39714977	0
chr19-34283596-34284012	0.012746	-0.30497	0.023	0.101	1	ENSMUST00000025691	Fas	ENSMUSG00000024778	protein_coding	exon	chr19-34290659-34290744	chr19-34283596-34284012	6646
chr12-13117905-13118484	0.0127926	0.147417	0.085	0.066	1	ENSMUST00000071103	Ddx1	ENSMUSG00000037149	protein_coding	utr	chr12-13219308-13219497	chr12-13117905-13118484	100823
chr11-75655662-75656212	0.0128773	-0.199683	0.16	0.298	1	ENSMUST00000108431	Myo1c	ENSMUSG00000017774	protein_coding	cds	chr11-75656184-75656201	chr11-75655662-75656212	0
chr5-119464452-119464945	0.0128858	-0.375919	0.065	0.154	1	ENSMUST00000156235	Gm16063	ENSMUSG00000085708	lincRNA	exon	chr5-119625942-119626030	chr5-119464452-119464945	160996
chr7-35120423-35120724	0.0129003	-0.142104	0.017	0.051	1	ENSMUST00000042985	Cebpa	ENSMUSG00000034957	protein_coding	cds	chr7-35119419-35120498	chr7-35120423-35120724	0
chr14-55765684-55766439	0.01291	-0.162481	0.02	0.071	1	ENSMUST00000057569	Ltb4r1	ENSMUSG00000046908	protein_coding	utr	chr14-55765962-55766093	chr14-55765684-55766439	0
chr12-79838133-79838685	0.0129844	0.14134	0.175	0.164	1	ENSMUST00000021552	Zfp36l1	ENSMUSG00000021127	protein_coding	utr	chr12-80107760-80109588	chr12-79838133-79838685	269074
chr10-25296351-25297357	0.0130508	-0.195726	0.213	0.338	1	ENSMUST00000177124	Akap7	ENSMUSG00000039166	protein_coding	cds	chr10-25296928-25297054	chr10-25296351-25297357	0
chr19-34464308-34465006	0.0130657	0.182949	0.078	0.045	1	ENSMUST00000050562	Ch25h	ENSMUSG00000050370	protein_coding	utr	chr19-34473786-34474229	chr19-34464308-34465006	8779
chr13-112753342-112753808	0.0131339	-0.351384	0.11	0.225	1	ENSMUST00000052514	Slc38a9	ENSMUSG00000047789	protein_coding	utr	chr13-112731665-112738743	chr13-112753342-112753808	14598
chr12-32819444-32821235	0.0131341	-0.115589	0.468	0.591	1	ENSMUST00000020886	Nampt	ENSMUSG00000020572	protein_coding	cds	chr12-32820570-32820626	chr12-32819444-32821235	0
chr6-22355229-22356500	0.0131696	-0.173833	0.192	0.343	1	ENSMUST00000165576	Fam3c	ENSMUSG00000029672	protein_coding	utr	chr6-22355995-22356166	chr6-22355229-22356500	0
chr12-86793679-86794319	0.0132025	-0.193174	0.045	0.116	1	ENSMUST00000095527	Lrrc74a	ENSMUSG00000059114	protein_coding	utr	chr12-86763624-86763795	chr12-86793679-86794319	29883
chr10-116301079-116301694	0.0132054	-0.354542	0.07	0.167	1	ENSMUST00000092167	Ptprb	ENSMUSG00000020154	protein_coding	cds	chr10-116301626-116301679	chr10-116301079-116301694	0
chr1-9847532-9848771	0.0132151	-0.177614	0.055	0.172	1	ENSMUST00000171265	Sgk3	ENSMUSG00000025915	protein_coding	utr	chr1-9848272-9848385	chr1-9847532-9848771	0
chr18-44663278-44663480	0.0132444	-0.277909	0.012	0.056	1	ENSMUST00000181094	A930012L18Rik	ENSMUSG00000097610	lincRNA	gap	chr18-44662283-44668794	chr18-44663278-44663480	0
chr15-101374866-101375277	0.0132521	-0.205158	0.053	0.121	1	ENSMUST00000077196	Krt80	ENSMUSG00000037185	protein_coding	exon	chr15-101369755-101370125	chr15-101374866-101375277	4740
chr5-98328922-98329695	0.0132634	0.110562	0.108	0.109	1	ENSMUST00000080333	1700007G11Rik	ENSMUSG00000057816	protein_coding	cds	chr5-98329354-98329464	chr5-98328922-98329695	0
chr12-111165152-111167229	0.0132825	-0.170535	0.202	0.356	1	ENSMUST00000139162	Traf3	ENSMUSG00000021277	protein_coding	utr	chr12-111166999-111167107	chr12-111165152-111167229	0
chr11-117093872-117094475	0.0132884	-0.306013	0.065	0.157	1	ENSMUST00000149822	2810008D09Rik	ENSMUSG00000086859	lincRNA	exon	chr11-117078776-117078955	chr11-117093872-117094475	14916
chr19-17835586-17836115	0.0132987	-0.214013	0.022	0.068	1	ENSMUST00000050715	Pcsk5	ENSMUSG00000024713	protein_coding	gap	chr19-17793734-17836954	chr19-17835586-17836115	0
chr2-9867126-9867822	0.0133771	-0.172941	0.018	0.076	1	ENSMUST00000151456	Gata3	ENSMUSG00000015619	protein_coding	gap	chr2-9863221-9868760	chr2-9867126-9867822	0
chr2-35432044-35432252	0.0133968	-0.224145	0.013	0.056	1	ENSMUST00000131745	Ggta1	ENSMUSG00000035778	protein_coding	gap	chr2-35423412-35432513	chr2-35432044-35432252	0
chr7-100492378-100494067	0.013399	-0.165457	0.155	0.28	1	ENSMUST00000153287	Ucp2	ENSMUSG00000033685	protein_coding	utr	chr7-100494067-100494375	chr7-100492378-100494067	0
chr4-154333250-154333639	0.0134025	-0.223935	0.022	0.063	1	ENSMUST00000156069	Prdm16	ENSMUSG00000039410	protein_coding	gap	chr4-154328834-154334374	chr4-154333250-154333639	0
chr8-64205290-64206274	0.0134153	-0.26671	0.042	0.106	1	ENSMUST00000066166	Tll1	ENSMUSG00000053626	protein_coding	cds	chr8-64205215-64205383	chr8-64205290-64206274	0
chr6-127154666-127155195	0.0134293	-0.201832	0.087	0.174	1	ENSMUST00000180811	9330179D12Rik	ENSMUSG00000097166	lincRNA	gap	chr6-127149564-127185368	chr6-127154666-127155195	0
chr13-81108090-81109171	0.0134308	0.173882	0.088	0.056	1	ENSMUST00000181508	9330111N05Rik	ENSMUSG00000097098	lincRNA	gap	chr13-80981489-81124589	chr13-81108090-81109171	0
chr6-118035696-118036633	0.0134485	-0.402972	0.072	0.179	1	ENSMUST00000164960	Rasgef1a	ENSMUSG00000030134	protein_coding	exon	chr6-118066385-118066462	chr6-118035696-118036633	29751
chr1-105786713-105787443	0.0135571	0.149608	0.112	0.083	1	ENSMUST00000187812	Tnfrsf11a	ENSMUSG00000026321	protein_coding	gap	chr1-105780830-105808142	chr1-105786713-105787443	0
chr8-119670258-119671269	0.013604	-0.316858	0.077	0.187	1	ENSMUST00000024107	Wfdc1	ENSMUSG00000023336	protein_coding	gap	chr8-119666661-119679267	chr8-119670258-119671269	0
chr5-104374050-104374661	0.0136157	0.168821	0.06	0.035	1	ENSMUST00000066207	Mepe	ENSMUSG00000053863	protein_coding	utr	chr5-104338322-104338611	chr5-104374050-104374661	35438
chr8-68211750-68212540	0.0136414	-0.149961	0.01	0.051	1	ENSMUST00000181816	Gm26659	ENSMUSG00000097609	lincRNA	exon	chr8-68218173-68220868	chr8-68211750-68212540	5632
chr10-121419789-121420493	0.0136442	-0.225259	0.098	0.23	1	ENSMUST00000026902	Rassf3	ENSMUSG00000025795	protein_coding	gap	chr10-121417193-121476002	chr10-121419789-121420493	0
chr5-34931602-34932735	0.0136487	-0.345716	0.078	0.174	1	ENSMUST00000050535	Msantd1	ENSMUSG00000051246	protein_coding	utr	chr5-34923565-34923839	chr5-34931602-34932735	7762
chr7-18959325-18959782	0.013651	-0.309455	0.155	0.288	1	ENSMUST00000172835	Nova2	ENSMUSG00000030411	protein_coding	utr	chr7-18958619-18962057	chr7-18959325-18959782	0
chr1-135146144-135148028	0.0136659	-0.181606	0.183	0.331	1	ENSMUST00000125774	Arl8a	ENSMUSG00000026426	protein_coding	cds	chr1-135147669-135147727	chr1-135146144-135148028	0
chr2-151530277-151531186	0.0136863	-0.258611	0.048	0.121	1	ENSMUST00000044011	Fkbp1a	ENSMUSG00000032966	protein_coding	exon	chr2-151542483-151542744	chr2-151530277-151531186	11296
chr7-130518988-130520164	0.0137123	-0.178476	0.282	0.444	1	ENSMUST00000178534	Ate1	ENSMUSG00000030850	protein_coding	cds	chr7-130519877-130519961	chr7-130518988-130520164	0
chr17-86752784-86755478	0.0137418	-0.141752	0.355	0.508	1	ENSMUST00000024954	Epas1	ENSMUSG00000024140	protein_coding	cds	chr17-86754283-86754308	chr17-86752784-86755478	0
chr4-136461882-136463113	0.0137492	-0.259201	0.16	0.295	1	ENSMUST00000084593	6030445D17Rik	ENSMUSG00000066178	protein_coding	cds	chr4-136462310-136462756	chr4-136461882-136463113	0
chr17-88168296-88168697	0.0137575	-0.327807	0.02	0.078	1	ENSMUST00000180785	Gm26612	ENSMUSG00000097676	lincRNA	exon	chr17-88159683-88159761	chr17-88168296-88168697	8534
chr3-40744319-40746587	0.013797	-0.164592	0.267	0.427	1	ENSMUST00000162279	Hspa4l	ENSMUSG00000025757	protein_coding	cds	chr3-40745611-40745784	chr3-40744319-40746587	0
chr15-78436736-78438084	0.0138758	0.128193	0.083	0.068	1	ENSMUST00000166142	Kctd17	ENSMUSG00000033287	protein_coding	cds	chr15-78437584-78437628	chr15-78436736-78438084	0
chr12-102691006-102691455	0.0138965	0.112429	0.053	0.038	1	ENSMUST00000179210	Itpk1	ENSMUSG00000057963	protein_coding	gap	chr12-102675468-102695710	chr12-102691006-102691455	0
chr2-69076940-69077646	0.0139016	-0.27324	0.042	0.131	1	ENSMUST00000176018	Cers6	ENSMUSG00000027035	protein_coding	gap	chr2-69071439-69105002	chr2-69076940-69077646	0
chr2-117119811-117122073	0.0139124	-0.16223	0.263	0.417	1	ENSMUST00000110901	Spred1	ENSMUSG00000027351	protein_coding	cds	chr2-117121725-117121756	chr2-117119811-117122073	0
chr4-46642813-46643954	0.0139152	-0.210956	0.1	0.21	1	ENSMUST00000107750	Tbc1d2	ENSMUSG00000039813	protein_coding	gap	chr4-46637737-46646116	chr4-46642813-46643954	0
chr17-86063295-86063826	0.0139441	0.101053	0.052	0.04	1	ENSMUST00000095187	Srbd1	ENSMUSG00000024135	protein_coding	gap	chr17-86057768-86098511	chr17-86063295-86063826	0
chr5-123040699-123041041	0.0139459	-0.245229	0.017	0.076	1	ENSMUST00000145257	Morn3	ENSMUSG00000029477	protein_coding	gap	chr5-123037861-123041082	chr5-123040699-123041041	0
chr8-125198455-125199765	0.0139531	-0.257669	0.033	0.091	1	ENSMUST00000121953	Disc1	ENSMUSG00000043051	protein_coding	gap	chr8-125165182-125218096	chr8-125198455-125199765	0
chr13-49371081-49371908	0.0139778	-0.241803	0.24	0.386	1	ENSMUST00000110085	Bicd2	ENSMUSG00000037933	protein_coding	gap	chr13-49369642-49375216	chr13-49371081-49371908	0
chr11-114866061-114866494	0.0140158	0.145418	0.057	0.035	1	ENSMUST00000177952	Gprc5c	ENSMUSG00000051043	protein_coding	gap	chr11-114864547-114866624	chr11-114866061-114866494	0
chr19-42659270-42660525	0.0140198	-0.168398	0.038	0.124	1	ENSMUST00000026190	Loxl4	ENSMUSG00000025185	protein_coding	exon	chr19-42612718-42612813	chr19-42659270-42660525	46456
chr6-95742376-95742676	0.0140236	-0.274681	0.017	0.058	1	ENSMUST00000079847	Suclg2	ENSMUSG00000061838	protein_coding	exon	chr6-95718689-95718837	chr6-95742376-95742676	23538
chr12-79796223-79796607	0.0140465	-0.359775	0.05	0.131	1	ENSMUST00000079533	Rad51b	ENSMUSG00000059060	protein_coding	utr	chr12-79507730-79508656	chr12-79796223-79796607	287566
chr2-84774591-84776026	0.0140595	0.132951	0.1	0.076	1	ENSMUST00000111641	Serping1	ENSMUSG00000023224	protein_coding	cds	chr2-84774740-84774790	chr2-84774591-84776026	0
chr7-49777585-49779015	0.0140618	-0.172423	0.177	0.318	1	ENSMUST00000147401	Prmt3	ENSMUSG00000030505	protein_coding	cds	chr7-49778581-49778713	chr7-49777585-49779015	0
chr15-59204176-59204585	0.0141376	-0.24239	0.012	0.058	1	ENSMUST00000162142	Sqle	ENSMUSG00000022351	protein_coding	exon	chr15-59315077-59316129	chr15-59204176-59204585	110491
chr6-88147133-88148032	0.0141393	-0.342194	0.155	0.29	1	ENSMUST00000032143	Rpn1	ENSMUSG00000030062	protein_coding	utr	chr6-88103548-88105304	chr6-88147133-88148032	41828
chr12-85531750-85533925	0.01418	-0.183445	0.11	0.227	1	ENSMUST00000021674	Fos	ENSMUSG00000021250	protein_coding	utr	chr12-85476459-85477273	chr12-85531750-85533925	54476
chr11-119817102-119817781	0.014212	-0.345908	0.057	0.144	1	ENSMUST00000147781	Rptor	ENSMUSG00000025583	protein_coding	cds	chr11-119817078-119817105	chr11-119817102-119817781	0
chr12-21154997-21155387	0.0142647	-0.304255	0.022	0.081	1	ENSMUST00000174530	Gm21989	ENSMUSG00000090370	processed_transcript	gap	chr12-21085786-21168203	chr12-21154997-21155387	0
chr6-116651509-116652013	0.014284	-0.219226	0.025	0.073	1	ENSMUST00000178241	8430408G22Rik	ENSMUSG00000048489	protein_coding	cds	chr6-116651698-116652315	chr6-116651509-116652013	0
chr18-64753191-64753510	0.0143094	-0.251764	0.023	0.073	1	ENSMUST00000025482	Atp8b1	ENSMUSG00000039529	protein_coding	exon	chr18-64660700-64661000	chr18-64753191-64753510	92190
chr5-147769707-147770261	0.0143178	-0.262107	0.015	0.056	1	ENSMUST00000031653	Flt1	ENSMUSG00000029648	protein_coding	exon	chr5-147725671-147726011	chr5-147769707-147770261	43695
chr15-101123190-101123480	0.0143306	-0.292802	0.023	0.086	1	ENSMUST00000070875	Ankrd33	ENSMUSG00000047034	protein_coding	utr	chr15-101119722-101120022	chr15-101123190-101123480	3167
chr3-102165532-102166092	0.014345	0.196817	0.088	0.058	1	ENSMUST00000161021	Vangl1	ENSMUSG00000027860	protein_coding	cds	chr3-102165773-102165811	chr3-102165532-102166092	0
chr3-65482789-65483440	0.014351	-0.198776	0.013	0.051	1	ENSMUST00000047906	Tiparp	ENSMUSG00000034640	protein_coding	exon	chr3-65528410-65528632	chr3-65482789-65483440	44969
chr11-95085764-95086069	0.0143609	-0.321999	0.037	0.104	1	ENSMUST00000120375	Itga3	ENSMUSG00000001507	protein_coding	exon	chr11-95076768-95076801	chr11-95085764-95086069	8962
chr7-16841248-16843213	0.0143779	-0.172122	0.252	0.399	1	ENSMUST00000168093	Prkd2	ENSMUSG00000041187	protein_coding	utr	chr7-16842902-16843033	chr7-16841248-16843213	0
chr16-38724985-38725304	0.0144091	-0.361143	0.048	0.126	1	ENSMUST00000023487	Arhgap31	ENSMUSG00000022799	protein_coding	exon	chr16-38712574-38713274	chr16-38724985-38725304	11710
chr2-118782285-118782632	0.014417	-0.374035	0.032	0.106	1	ENSMUST00000142072	Disp2	ENSMUSG00000040035	protein_coding	gap	chr2-118779930-118786045	chr2-118782285-118782632	0
chr8-122665117-122666064	0.0144413	-0.26116	0.107	0.227	1	ENSMUST00000148630	Cbfa2t3	ENSMUSG00000006362	protein_coding	gap	chr8-122650477-122698814	chr8-122665117-122666064	0
chr16-32643477-32645962	0.0144453	-0.180287	0.15	0.288	1	ENSMUST00000115126	Tnk2	ENSMUSG00000022791	protein_coding	utr	chr16-32644643-32645108	chr16-32643477-32645962	0
chr11-16591235-16591993	0.0144992	0.13634	0.127	0.106	1	ENSMUST00000178855	Sec61g	ENSMUSG00000078974	protein_coding	exon	chr11-16508079-16508484	chr11-16591235-16591993	82750
chr19-21814408-21814716	0.0145114	-0.309125	0.035	0.104	1	ENSMUST00000096194	Tmem2	ENSMUSG00000024754	protein_coding	gap	chr19-21812621-21815430	chr19-21814408-21814716	0
chr9-73070897-73071590	0.0145797	-0.231177	0.047	0.131	1	ENSMUST00000184575	Rab27a	ENSMUSG00000032202	protein_coding	gap	chr9-73045012-73075392	chr9-73070897-73071590	0
chr6-94189277-94189678	0.0145838	0.131544	0.055	0.04	1	ENSMUST00000089317	Magi1	ENSMUSG00000045095	protein_coding	gap	chr6-93943321-94283009	chr6-94189277-94189678	0
chr4-7391643-7391866	0.0146006	0.125097	0.118	0.109	1	ENSMUST00000129988	8430436N08Rik	ENSMUSG00000086070	lincRNA	exon	chr4-7560688-7560822	chr4-7391643-7391866	168821
chr1-191182299-191183950	0.0146069	-0.115902	0.482	0.609	1	ENSMUST00000027941	Atf3	ENSMUSG00000026628	protein_coding	utr	chr1-191183093-191183340	chr1-191182299-191183950	0
chr17-80198903-80199714	0.0146107	0.120901	0.095	0.061	1	ENSMUST00000063417	Srsf7	ENSMUSG00000024097	protein_coding	utr	chr17-80200089-80201547	chr17-80198903-80199714	374
chr12-117809979-117810719	0.014623	-0.229095	0.013	0.063	1	ENSMUST00000176499	Cdca7l	ENSMUSG00000021175	protein_coding	gap	chr12-117804387-117834154	chr12-117809979-117810719	0
chr2-131957658-131958164	0.0146307	0.216554	0.147	0.104	1	ENSMUST00000136783	Gm28045	ENSMUSG00000098754	protein_coding	utr	chr2-131953556-131956130	chr2-131957658-131958164	1527
chr7-110893965-110895013	0.0146641	-0.283978	0.053	0.139	1	ENSMUST00000127935	Mrvi1	ENSMUSG00000005611	protein_coding	gap	chr7-110888584-110895793	chr7-110893965-110895013	0
chr11-106611986-106614089	0.0146646	-0.163737	0.292	0.429	1	ENSMUST00000128933	Tex2	ENSMUSG00000040548	protein_coding	utr	chr11-106613215-106613423	chr11-106611986-106614089	0
chr9-21797550-21798996	0.0146693	0.105894	0.297	0.29	1	ENSMUST00000034717	Kank2	ENSMUSG00000032194	protein_coding	utr	chr9-21798482-21798546	chr9-21797550-21798996	0
chr7-4498106-4498593	0.0146779	-0.21347	0.068	0.154	1	ENSMUST00000145689	Ppp1r12c	ENSMUSG00000019254	protein_coding	gap	chr7-4497547-4501265	chr7-4498106-4498593	0
chr1-191254351-191254817	0.014715	0.104475	0.06	0.048	1	ENSMUST00000192965	RP24-443M8.2	ENSMUSG00000103174	lincRNA	exon	chr1-191267178-191267227	chr1-191254351-191254817	12360
chr10-4036925-4037377	0.0147378	-0.201679	0.015	0.051	1	ENSMUST00000154517	Mthfd1l	ENSMUSG00000040675	protein_coding	gap	chr10-4035319-4041772	chr10-4036925-4037377	0
chr1-152677467-152678268	0.0147543	-0.20556	0.013	0.066	1	ENSMUST00000111859	Rgl1	ENSMUSG00000026482	protein_coding	gap	chr1-152675024-152765906	chr1-152677467-152678268	0
chr12-70706813-70708249	0.0147739	0.100835	0.102	0.093	1	ENSMUST00000057859	Frmd6	ENSMUSG00000048285	protein_coding	exon	chr12-70825514-70825573	chr12-70706813-70708249	117264
chr12-70140523-70140880	0.0147767	-0.114198	0.007	0.056	1	ENSMUST00000162570	Abhd12b	ENSMUSG00000090121	protein_coding	exon	chr12-70154142-70154265	chr12-70140523-70140880	13261
chr1-53978288-53978802	0.0147888	-0.377464	0.06	0.154	1	ENSMUST00000146850	Hecw2	ENSMUSG00000042807	protein_coding	gap	chr1-53950922-54040200	chr1-53978288-53978802	0
chr5-140701548-140702455	0.0148219	-0.17532	0.073	0.197	1	ENSMUST00000142081	Iqce	ENSMUSG00000036555	protein_coding	cds	chr5-140702182-140702217	chr5-140701548-140702455	0
chr1-132376277-132377316	0.0148319	-0.219222	0.037	0.106	1	ENSMUST00000132435	Tmcc2	ENSMUSG00000042066	protein_coding	gap	chr1-132361216-132380656	chr1-132376277-132377316	0
chr3-104298750-104299282	0.014834	0.140816	0.063	0.048	1	ENSMUST00000056145	Gm5546	ENSMUSG00000022187	lincRNA	exon	chr3-104350635-104353262	chr3-104298750-104299282	51352
chr6-114663593-114664083	0.0148496	-0.179032	0.012	0.056	1	ENSMUST00000183165	Atg7	ENSMUSG00000030314	protein_coding	gap	chr6-114643151-114672973	chr6-114663593-114664083	0
chr9-7183818-7185499	0.0148946	-0.180892	0.182	0.311	1	ENSMUST00000034499	Dcun1d5	ENSMUSG00000032002	protein_coding	cds	chr9-7184797-7184882	chr9-7183818-7185499	0
chr17-66448446-66450337	0.0149453	-0.244119	0.092	0.217	1	ENSMUST00000097291	Mtcl1	ENSMUSG00000052105	protein_coding	cds	chr17-66448317-66449345	chr17-66448446-66450337	0
chr1-177982633-177983757	0.0149713	-0.168076	0.258	0.399	1	ENSMUST00000191719	Gm16432	ENSMUSG00000091476	protein_coding	gap	chr1-177983705-178002994	chr1-177982633-177983757	0
chr17-28515597-28516473	0.0149867	-0.169083	0.063	0.157	1	ENSMUST00000177939	Fkbp5	ENSMUSG00000024222	protein_coding	gap	chr17-28507470-28517394	chr17-28515597-28516473	0
chr19-37585074-37586026	0.0150112	0.124484	0.058	0.04	1	ENSMUST00000066439	Exoc6	ENSMUSG00000053799	protein_coding	cds	chr19-37585811-37585894	chr19-37585074-37586026	0
chr2-167121201-167121504	0.0150241	-0.276479	0.023	0.068	1	ENSMUST00000059826	Kcnb1	ENSMUSG00000050556	protein_coding	gap	chr2-167106360-167188056	chr2-167121201-167121504	0
chr4-151902134-151903201	0.0150301	-0.176615	0.053	0.124	1	ENSMUST00000062904	Dnajc11	ENSMUSG00000039768	protein_coding	exon	chr4-151933691-151933824	chr4-151902134-151903201	30489
chr7-100461280-100462056	0.0150371	-0.191422	0.042	0.129	1	ENSMUST00000183512	Gm10603	ENSMUSG00000099137	lincRNA	gap	chr7-100448882-100474707	chr7-100461280-100462056	0
chr8-11279281-11279649	0.0150427	-0.353629	0.063	0.149	1	ENSMUST00000033898	Col4a1	ENSMUSG00000031502	protein_coding	gap	chr8-11267657-11312515	chr8-11279281-11279649	0
chr4-115546171-115546615	0.0150815	-0.305018	0.012	0.058	1	ENSMUST00000058785	Cyp4a10	ENSMUSG00000066072	protein_coding	utr	chr4-115533134-115533649	chr4-115546171-115546615	12521
chr2-32908314-32908748	0.0150871	-0.30019	0.072	0.162	1	ENSMUST00000138781	Fam129b	ENSMUSG00000026796	protein_coding	gap	chr2-32905900-32909848	chr2-32908314-32908748	0
chr4-95376961-95377919	0.0150957	-0.236438	0.033	0.106	1	ENSMUST00000187014	Gm29064	ENSMUSG00000100129	lincRNA	exon	chr4-95401978-95402790	chr4-95376961-95377919	24058
chr3-67373696-67374909	0.0151048	0.116521	0.132	0.124	1	ENSMUST00000126628	Mlf1	ENSMUSG00000048416	protein_coding	cds	chr3-67374216-67374262	chr3-67373696-67374909	0
chr7-19441319-19441719	0.0151123	-0.337332	0.033	0.098	1	ENSMUST00000085715	Mark4	ENSMUSG00000030397	protein_coding	gap	chr7-19437519-19443116	chr7-19441319-19441719	0
chr3-104218810-104221365	0.0151183	-0.127634	0.43	0.566	1	ENSMUST00000122303	Magi3	ENSMUSG00000052539	protein_coding	cds	chr3-104219645-104219966	chr3-104218810-104221365	0
chr8-35959258-35959496	0.015135	-0.242132	0.028	0.068	1	ENSMUST00000060128	Cldn23	ENSMUSG00000055976	protein_coding	exon	chr8-35824709-35826559	chr8-35959258-35959496	132698
chr11-79738676-79739627	0.0151494	-0.270227	0.205	0.354	1	ENSMUST00000137738	Gm11205	ENSMUSG00000084969	lincRNA	exon	chr11-79705151-79705420	chr11-79738676-79739627	33255
chr6-52477087-52477806	0.0151764	-0.168807	0.025	0.088	1	ENSMUST00000031788	Hibadh	ENSMUSG00000029776	protein_coding	utr	chr6-52546228-52546903	chr6-52477087-52477806	68421
chr17-35779398-35780002	0.0151954	-0.230803	0.033	0.101	1	ENSMUST00000172874	4833427F10Rik	ENSMUSG00000092171	lincRNA	gap	chr17-35777224-35780022	chr17-35779398-35780002	0
chr15-62328180-62329353	0.0152176	0.108792	0.075	0.058	1	ENSMUST00000181416	Pvt1	ENSMUSG00000097039	lincRNA	gap	chr15-62313480-62372475	chr15-62328180-62329353	0
chr18-80080871-80081528	0.0152202	0.198346	0.068	0.04	1	ENSMUST00000070219	Pard6g	ENSMUSG00000056214	protein_coding	gap	chr18-80080048-80116968	chr18-80080871-80081528	0
chr19-17836261-17837871	0.015247	-0.249569	0.08	0.172	1	ENSMUST00000050715	Pcsk5	ENSMUSG00000024713	protein_coding	cds	chr19-17836955-17837152	chr19-17836261-17837871	0
chr4-97777052-97778890	0.0152496	-0.182125	0.117	0.217	1	ENSMUST00000146447	E130114P18Rik	ENSMUSG00000048747	protein_coding	cds	chr4-97777991-97778048	chr4-97777052-97778890	0
chr3-158137555-158138101	0.0152667	-0.262509	0.015	0.063	1	ENSMUST00000106044	Lrrc7	ENSMUSG00000028176	protein_coding	gap	chr3-158135410-158148579	chr3-158137555-158138101	0
chr13-103710104-103710952	0.0152676	-0.306903	0.048	0.124	1	ENSMUST00000074616	Srek1	ENSMUSG00000032621	protein_coding	utr	chr13-103741615-103743563	chr13-103710104-103710952	30662
chr11-50207387-50207699	0.0153	0.160483	0.082	0.043	1	ENSMUST00000143379	Sqstm1	ENSMUSG00000015837	protein_coding	cds	chr11-50207407-50207636	chr11-50207387-50207699	0
chr15-38373623-38374310	0.0153099	-0.209509	0.095	0.215	1	ENSMUST00000181144	Gm26863	ENSMUSG00000097645	lincRNA	exon	chr15-38384981-38385264	chr15-38373623-38374310	10670
chr12-51705746-51706039	0.0153611	-0.237192	0.023	0.068	1	ENSMUST00000021338	Ap4s1	ENSMUSG00000020955	protein_coding	gap	chr12-51691315-51716941	chr12-51705746-51706039	0
chr7-110862602-110863272	0.0153836	-0.335637	0.092	0.187	1	ENSMUST00000033050	Lyve1	ENSMUSG00000030787	protein_coding	cds	chr7-110862784-110862868	chr7-110862602-110863272	0
chr15-73691737-73692117	0.0153886	-0.263981	0.022	0.071	1	ENSMUST00000064166	Gpr20	ENSMUSG00000045281	protein_coding	utr	chr15-73694604-73695461	chr15-73691737-73692117	2486
chrX-99232728-99233464	0.0154539	-0.365152	0.067	0.146	1	ENSMUST00000052839	Efnb1	ENSMUSG00000031217	protein_coding	utr	chrX-99147528-99148991	chrX-99232728-99233464	83736
chr14-63943074-63944018	0.0154848	-0.278655	0.177	0.303	1	ENSMUST00000079652	Sox7	ENSMUSG00000063060	protein_coding	cds	chr14-63943756-63943993	chr14-63943074-63944018	0
chr8-120124231-120124559	0.0155424	-0.273136	0.033	0.096	1	ENSMUST00000127664	Gm20388	ENSMUSG00000092329	protein_coding	gap	chr8-119910940-124295357	chr8-120124231-120124559	0
chr1-134092456-134094228	0.0155455	-0.160824	0.302	0.437	1	ENSMUST00000020692	Btg2	ENSMUSG00000020423	protein_coding	exon	chr1-134078912-134079120	chr1-134092456-134094228	13335
chr19-46456399-46456656	0.0155687	-0.214633	0.017	0.073	1	ENSMUST00000118440	Sufu	ENSMUSG00000025231	protein_coding	gap	chr19-46454847-46473571	chr19-46456399-46456656	0
chr11-100389837-100390270	0.015572	-0.302293	0.113	0.215	1	ENSMUST00000155746	Jup	ENSMUSG00000001552	protein_coding	gap	chr11-100386389-100397635	chr11-100389837-100390270	0
chr12-76493369-76493922	0.0155727	0.172007	0.147	0.119	1	ENSMUST00000075249	Plekhg3	ENSMUSG00000052609	protein_coding	exon	chr12-76533560-76533818	chr12-76493369-76493922	39637
chr6-112304509-112305220	0.0156239	-0.214036	0.03	0.081	1	ENSMUST00000032376	Lmcd1	ENSMUSG00000057604	protein_coding	cds	chr6-112305049-112305137	chr6-112304509-112305220	0
chr14-100284225-100286514	0.0156365	-0.193557	0.175	0.298	1	ENSMUST00000137352	4930517O19Rik	ENSMUSG00000054391	processed_transcript	exon	chr14-100246082-100246280	chr14-100284225-100286514	37944
chr4-155561777-155564562	0.0156381	-0.121047	0.452	0.591	1	ENSMUST00000146080	Nadk	ENSMUSG00000029063	protein_coding	utr	chr4-155563908-155563979	chr4-155561777-155564562	0
chr3-37874842-37876604	0.0157039	-0.217826	0.087	0.187	1	ENSMUST00000099128	Gm5148	ENSMUSG00000058174	protein_coding	exon	chr3-37724203-37724490	chr3-37874842-37876604	150351
chr9-61021630-61023120	0.0157041	0.103125	0.215	0.21	1	ENSMUST00000050183	Uaca	ENSMUSG00000034485	protein_coding	utr	chr9-60880246-60880370	chr9-61021630-61023120	141259
chr3-100921519-100922906	0.0157095	-0.124532	0.428	0.558	1	ENSMUST00000094048	Trim45	ENSMUSG00000033233	protein_coding	cds	chr3-100922298-100922387	chr3-100921519-100922906	0
chr5-107237902-107238608	0.0157098	-0.172765	0.022	0.056	1	ENSMUST00000146591	Tgfbr3	ENSMUSG00000029287	protein_coding	gap	chr5-107215078-107266193	chr5-107237902-107238608	0
chr1-170479245-170479617	0.0157104	-0.285914	0.03	0.081	1	ENSMUST00000161966	Nos1ap	ENSMUSG00000038473	protein_coding	gap	chr1-170390824-170514614	chr1-170479245-170479617	0
chr6-52486646-52486982	0.0157368	-0.281852	0.035	0.093	1	ENSMUST00000031788	Hibadh	ENSMUSG00000029776	protein_coding	utr	chr6-52546228-52546903	chr6-52486646-52486982	59245
chr9-69988902-69990173	0.0157484	-0.180809	0.198	0.356	1	ENSMUST00000154772	Bnip2	ENSMUSG00000011958	protein_coding	utr	chr9-69989517-69989689	chr9-69988902-69990173	0
chr6-92036290-92036710	0.0157598	-0.253916	0.022	0.073	1	ENSMUST00000113466	Fgd5	ENSMUSG00000034037	protein_coding	gap	chr6-92024634-92038024	chr6-92036290-92036710	0
chr5-114374346-114375114	0.0158135	-0.255688	0.083	0.189	1	ENSMUST00000134532	Kctd10	ENSMUSG00000001098	protein_coding	cds	chr5-114374896-114375109	chr5-114374346-114375114	0
chr19-44247468-44249093	0.0158212	-0.151654	0.277	0.422	1	ENSMUST00000026220	Scd3	ENSMUSG00000025202	protein_coding	utr	chr19-44241860-44244016	chr19-44247468-44249093	3451
chr13-97320484-97321024	0.0158274	-0.277833	0.017	0.063	1	ENSMUST00000181148	C430039J16Rik	ENSMUSG00000097932	lincRNA	exon	chr13-97285009-97285934	chr13-97320484-97321024	34549
chr2-119476403-119478535	0.0158485	-0.160663	0.278	0.449	1	ENSMUST00000110808	Ino80	ENSMUSG00000034154	protein_coding	utr	chr2-119477379-119477613	chr2-119476403-119478535	0
chr3-27898649-27899707	0.0158851	-0.156538	0.018	0.061	1	ENSMUST00000058077	Tmem212	ENSMUSG00000043164	protein_coding	exon	chr3-27896185-27896368	chr3-27898649-27899707	2280
chr7-45019265-45019474	0.0159002	-0.203424	0.038	0.104	1	ENSMUST00000044111	Rras	ENSMUSG00000038387	protein_coding	gap	chr7-45018169-45020099	chr7-45019265-45019474	0
chr6-89361152-89363154	0.0159091	-0.180703	0.175	0.285	1	ENSMUST00000163139	Plxna1	ENSMUSG00000030084	protein_coding	utr	chr6-89362407-89362613	chr6-89361152-89363154	0
chr4-130841029-130841579	0.015928	-0.292598	0.065	0.141	1	ENSMUST00000070478	Sdc3	ENSMUSG00000025743	protein_coding	utr	chr4-130822810-130826319	chr4-130841029-130841579	14709
chr8-110711175-110711909	0.0159417	-0.319205	0.127	0.232	1	ENSMUST00000034190	Vac14	ENSMUSG00000010936	protein_coding	cds	chr8-110711593-110711711	chr8-110711175-110711909	0
chr12-54861851-54863449	0.0159971	-0.180955	0.155	0.295	1	ENSMUST00000078124	Cfl2	ENSMUSG00000062929	protein_coding	cds	chr12-54862744-54862746	chr12-54861851-54863449	0
chr1-64104626-64105082	0.0160128	-0.227775	0.037	0.104	1	ENSMUST00000135075	Klf7	ENSMUSG00000025959	protein_coding	gap	chr1-64079335-64120899	chr1-64104626-64105082	0
chr5-39637493-39638302	0.0160227	-0.165556	0.025	0.111	1	ENSMUST00000152057	Hs3st1	ENSMUSG00000051022	protein_coding	gap	chr5-39615405-39644217	chr5-39637493-39638302	0
chr1-64970223-64971258	0.0160268	-0.176317	0.013	0.081	1	ENSMUST00000097713	Plekhm3	ENSMUSG00000051344	protein_coding	exon	chr1-64956695-64956824	chr1-64970223-64971258	13398
chr8-83805684-83805982	0.0160746	-0.279464	0.023	0.078	1	ENSMUST00000002964	Cd97	ENSMUSG00000002885	protein_coding	exon	chr8-83741107-83741326	chr8-83805684-83805982	64357
chr4-137387315-137389317	0.0160871	-0.180775	0.182	0.328	1	ENSMUST00000189334	2810405F17Rik	ENSMUSG00000101493	lincRNA	exon	chr4-137387266-137388382	chr4-137387315-137389317	0
chr11-113806252-113807546	0.016105	-0.21835	0.052	0.134	1	ENSMUST00000041627	Sdk2	ENSMUSG00000041592	protein_coding	cds	chr11-113806267-113806404	chr11-113806252-113807546	0
chr1-60408722-60410309	0.0161247	-0.17607	0.252	0.386	1	ENSMUST00000189980	Abi2	ENSMUSG00000026782	protein_coding	cds	chr1-60409803-60409919	chr1-60408722-60410309	0
chr4-149936825-149937206	0.0161388	0.150996	0.052	0.028	1	ENSMUST00000156897	Spsb1	ENSMUSG00000039911	protein_coding	gap	chr4-149907258-149953737	chr4-149936825-149937206	0
chr18-82791106-82791833	0.0161428	-0.325327	0.063	0.146	1	ENSMUST00000188435	2210420H20Rik	ENSMUSG00000101773	lincRNA	exon	chr18-82758814-82759041	chr18-82791106-82791833	32064
chr18-65693299-65693791	0.0161664	-0.263446	0.052	0.116	1	ENSMUST00000049016	Zfp532	ENSMUSG00000042439	protein_coding	utr	chr18-65687457-65689443	chr18-65693299-65693791	3855
chr18-65429716-65431645	0.0161865	-0.116682	0.478	0.596	1	ENSMUST00000049248	Malt1	ENSMUSG00000032688	protein_coding	cds	chr18-65431172-65431398	chr18-65429716-65431645	0
chr10-60373892-60374577	0.0161979	-0.258732	0.195	0.313	1	ENSMUST00000135638	Cdh23	ENSMUSG00000012819	protein_coding	gap	chr10-60337863-60376788	chr10-60373892-60374577	0
chr7-105398917-105400701	0.0162548	-0.108138	0.495	0.609	1	ENSMUST00000179474	Fam160a2	ENSMUSG00000044465	protein_coding	utr	chr7-105399884-105400054	chr7-105398917-105400701	0
chr8-83747521-83749537	0.0162735	-0.179108	0.17	0.311	1	ENSMUST00000002964	Cd97	ENSMUSG00000002885	protein_coding	exon	chr8-83741107-83741326	chr8-83747521-83749537	6194
chr13-42532514-42532724	0.0162781	-0.279492	0.012	0.053	1	ENSMUST00000128646	Phactr1	ENSMUSG00000054728	protein_coding	exon	chr13-42680623-42680926	chr13-42532514-42532724	147898
chr6-134189261-134190156	0.0163383	-0.235868	0.062	0.164	1	ENSMUST00000164648	Etv6	ENSMUSG00000030199	protein_coding	gap	chr6-134137418-134222864	chr6-134189261-134190156	0
chr3-41194322-41195908	0.016387	0.106315	0.055	0.028	1	ENSMUST00000058578	Pgrmc2	ENSMUSG00000049940	protein_coding	exon	chr3-41082595-41083046	chr3-41194322-41195908	111275
chr16-49839405-49840608	0.0164601	-0.160546	0.09	0.21	1	ENSMUST00000084838	Cd47	ENSMUSG00000055447	protein_coding	exon	chr16-49855618-49855832	chr16-49839405-49840608	15009
chr16-85755897-85756820	0.0164741	-0.223957	0.048	0.126	1	ENSMUST00000023610	Adamts1	ENSMUSG00000022893	protein_coding	utr	chr16-85793827-85795400	chr16-85755897-85756820	37006
chr5-64811018-64813157	0.0164874	-0.175159	0.193	0.331	1	ENSMUST00000166409	Klf3	ENSMUSG00000029178	protein_coding	utr	chr5-64812339-64812503	chr5-64811018-64813157	0
chr2-138245505-138246264	0.0165252	0.132131	0.052	0.028	1	ENSMUST00000091556	Btbd3	ENSMUSG00000062098	protein_coding	exon	chr2-138256565-138256754	chr2-138245505-138246264	10300
chr6-125594384-125595203	0.0165293	-0.179512	0.03	0.096	1	ENSMUST00000150548	Vwf	ENSMUSG00000001930	protein_coding	gap	chr6-125591681-125598481	chr6-125594384-125595203	0
chr2-44926173-44927818	0.0165417	-0.12553	0.418	0.543	1	ENSMUST00000148279	Gtdc1	ENSMUSG00000036890	protein_coding	utr	chr2-44927605-44927657	chr2-44926173-44927818	0
chr8-121082810-121084652	0.0165688	-0.245093	0.192	0.333	1	ENSMUST00000181504	Foxf1	ENSMUSG00000042812	protein_coding	cds	chr8-121084399-121085374	chr8-121082810-121084652	0
chr8-121451333-121451970	0.0165817	0.180467	0.197	0.167	1	ENSMUST00000127664	Gm20388	ENSMUSG00000092329	protein_coding	gap	chr8-119910940-124295357	chr8-121451333-121451970	0
chr14-31217467-31217975	0.0165875	-0.232506	0.04	0.116	1	ENSMUST00000090180	Sema3g	ENSMUSG00000021904	protein_coding	cds	chr14-31217911-31218025	chr14-31217467-31217975	0
chr2-158139621-158140068	0.016597	-0.230426	0.067	0.141	1	ENSMUST00000174718	Tgm2	ENSMUSG00000037820	protein_coding	gap	chr2-158138950-158142994	chr2-158139621-158140068	0
chr7-24902506-24903287	0.0166383	-0.188027	0.152	0.29	1	ENSMUST00000117796	Arhgef1	ENSMUSG00000040940	protein_coding	utr	chr7-24902912-24903128	chr7-24902506-24903287	0
chr11-117939601-117940305	0.0166397	-0.240806	0.082	0.169	1	ENSMUST00000054002	Socs3	ENSMUSG00000053113	protein_coding	utr	chr11-117966079-117967552	chr11-117939601-117940305	25773
chr11-86961413-86962333	0.0166449	-0.248019	0.052	0.129	1	ENSMUST00000018571	Ypel2	ENSMUSG00000018427	protein_coding	gap	chr11-86945977-86971808	chr11-86961413-86962333	0
chr5-97685462-97685743	0.0166699	-0.267401	0.025	0.066	1	ENSMUST00000180634	4930467D21Rik	ENSMUSG00000097516	lincRNA	exon	chr5-97585853-97588125	chr5-97685462-97685743	97336
chr12-100211931-100212848	0.0166798	0.11056	0.073	0.048	1	ENSMUST00000180771	Gm26723	ENSMUSG00000096947	lincRNA	exon	chr12-100209050-100209814	chr12-100211931-100212848	2116
chr1-170588913-170590185	0.0166803	-0.202927	0.095	0.189	1	ENSMUST00000161966	Nos1ap	ENSMUSG00000038473	protein_coding	cds	chr1-170589260-170589364	chr1-170588913-170590185	0
chr5-122396798-122397354	0.0166845	-0.294696	0.072	0.184	1	ENSMUST00000102525	Arpc3	ENSMUSG00000029465	protein_coding	cds	chr5-122396817-122396916	chr5-122396798-122397354	0
chrX-75415828-75417150	0.0166878	-0.19152	0.17	0.308	1	ENSMUST00000133781	Brcc3	ENSMUSG00000031201	protein_coding	cds	chrX-75416719-75416841	chrX-75415828-75417150	0
chr9-73068208-73068921	0.0167228	-0.308161	0.053	0.141	1	ENSMUST00000184575	Rab27a	ENSMUSG00000032202	protein_coding	gap	chr9-73045012-73075392	chr9-73068208-73068921	0
chr5-112298263-112298922	0.0167429	0.119178	0.162	0.149	1	ENSMUST00000151947	Tpst2	ENSMUSG00000029344	protein_coding	gap	chr5-112288813-112303899	chr5-112298263-112298922	0
chr11-97904902-97905123	0.0167532	0.218248	0.085	0.053	1	ENSMUST00000152825	Gm11630	ENSMUSG00000086917	lincRNA	exon	chr11-97893463-97893811	chr11-97904902-97905123	11090
chr1-23286649-23287070	0.0167573	0.155474	0.058	0.035	1	ENSMUST00000182303	Gm27028	ENSMUSG00000097970	lincRNA	exon	chr1-23291537-23291935	chr1-23286649-23287070	4466
chr15-12213480-12213883	0.016782	-0.177787	0.015	0.053	1	ENSMUST00000174418	Mtmr12	ENSMUSG00000039458	protein_coding	gap	chr15-12205280-12230273	chr15-12213480-12213883	0
chr3-52630026-52630835	0.0167852	-0.225709	0.038	0.119	1	ENSMUST00000195035	RP24-117F4.2	ENSMUSG00000103965	lincRNA	exon	chr3-52549663-52550219	chr3-52630026-52630835	79806
chr10-42251082-42251612	0.0167935	-0.183792	0.045	0.098	1	ENSMUST00000177542	Foxo3	ENSMUSG00000048756	protein_coding	gap	chr10-42197902-42257605	chr10-42251082-42251612	0
chr8-72160006-72161979	0.0167969	-0.10685	0.523	0.639	1	ENSMUST00000003121	Rab8a	ENSMUSG00000003037	protein_coding	cds	chr8-72161359-72161482	chr8-72160006-72161979	0
chr4-155177833-155179557	0.0167983	-0.191456	0.175	0.295	1	ENSMUST00000129314	Ski	ENSMUSG00000029050	protein_coding	gap	chr4-155160957-155188256	chr4-155177833-155179557	0
chr17-86663194-86663844	0.0168195	-0.151207	0.012	0.051	1	ENSMUST00000097275	Prkce	ENSMUSG00000045038	protein_coding	utr	chr17-86654688-86657919	chr17-86663194-86663844	5274
chr17-56211043-56211400	0.0168714	0.199588	0.138	0.104	1	ENSMUST00000038794	Dpp9	ENSMUSG00000001229	protein_coding	gap	chr17-56206890-56211579	chr17-56211043-56211400	0
chr17-84140434-84141516	0.0168828	-0.243494	0.132	0.255	1	ENSMUST00000060366	Zfp36l2	ENSMUSG00000045817	protein_coding	utr	chr17-84183931-84185752	chr17-84140434-84141516	42414
chr2-152785289-152786238	0.0168856	-0.249131	0.098	0.202	1	ENSMUST00000173755	Bcl2l1	ENSMUSG00000007659	protein_coding	gap	chr2-152782283-152828446	chr2-152785289-152786238	0
chr12-17444471-17444741	0.0168915	0.154346	0.06	0.04	1	ENSMUST00000046011	Nol10	ENSMUSG00000061458	protein_coding	utr	chr12-17429235-17430094	chr12-17444471-17444741	14376
chr15-96035159-96035588	0.0168937	-0.360805	0.027	0.101	1	ENSMUST00000139808	D030018L15Rik	ENSMUSG00000078925	lincRNA	exon	chr15-96051616-96053019	chr15-96035159-96035588	16027
chr2-120026734-120028636	0.0169047	-0.190524	0.143	0.283	1	ENSMUST00000162393	Gm28042	ENSMUSG00000033852	protein_coding	cds	chr2-120027513-120027576	chr2-120026734-120028636	0
chr10-5591513-5592092	0.0169108	-0.316036	0.03	0.093	1	ENSMUST00000051809	Myct1	ENSMUSG00000046916	protein_coding	exon	chr10-5593728-5593901	chr10-5591513-5592092	1635
chr9-44966693-44967118	0.0169268	-0.188437	0.053	0.139	1	ENSMUST00000117549	Ube4a	ENSMUSG00000059890	protein_coding	exon	chr9-44965485-44965600	chr9-44966693-44967118	1092
chr1-74036634-74037316	0.0169504	-0.206747	0.05	0.126	1	ENSMUST00000187281	Tns1	ENSMUSG00000055322	protein_coding	cds	chr1-74036971-74037133	chr1-74036634-74037316	0
chr3-38483545-38485411	0.0169782	-0.117528	0.457	0.591	1	ENSMUST00000120875	Ankrd50	ENSMUSG00000044864	protein_coding	utr	chr3-38484671-38484844	chr3-38483545-38485411	0
chr9-115332889-115333409	0.0169896	-0.250023	0.08	0.136	1	ENSMUST00000035010	Stt3b	ENSMUSG00000032437	protein_coding	exon	chr9-115309752-115310421	chr9-115332889-115333409	22467
chr6-124702561-124703055	0.0170039	-0.154611	0.015	0.073	1	ENSMUST00000004381	Lpcat3	ENSMUSG00000004270	protein_coding	cds	chr6-124703006-124703153	chr6-124702561-124703055	0
chr7-35149925-35150227	0.0170103	0.190344	0.067	0.035	1	ENSMUST00000042985	Cebpa	ENSMUSG00000034957	protein_coding	utr	chr7-35120499-35121926	chr7-35149925-35150227	27998
chr8-36608233-36608827	0.0170126	-0.272859	0.037	0.098	1	ENSMUST00000163663	Dlc1	ENSMUSG00000031523	protein_coding	gap	chr8-36599441-36763644	chr8-36608233-36608827	0
chr15-83303694-83304000	0.0170288	-0.305173	0.035	0.101	1	ENSMUST00000067215	Arfgap3	ENSMUSG00000054277	protein_coding	gap	chr15-83303225-83306880	chr15-83303694-83304000	0
chr9-114804800-114805659	0.0170639	0.166009	0.23	0.189	1	ENSMUST00000047013	Cmtm8	ENSMUSG00000041012	protein_coding	gap	chr9-114796215-114843780	chr9-114804800-114805659	0
chr18-34865415-34866222	0.0170771	0.143085	0.177	0.139	1	ENSMUST00000064795	Egr1	ENSMUSG00000038418	protein_coding	utr	chr18-34863769-34864984	chr18-34865415-34866222	430
chr6-51168697-51169112	0.017088	-0.166406	0.018	0.061	1	ENSMUST00000187879	Gm29004	ENSMUSG00000099538	lincRNA	exon	chr6-51003936-51004253	chr6-51168697-51169112	164443
chr1-38605982-38606191	0.0170906	-0.251055	0.012	0.051	1	ENSMUST00000134963	Aff3	ENSMUSG00000037138	protein_coding	gap	chr1-38536947-38664857	chr1-38605982-38606191	0
chr13-4770997-4772043	0.0170916	-0.157035	0.187	0.306	1	ENSMUST00000065956	Gm5444	ENSMUSG00000053499	protein_coding	cds	chr13-4771660-4771696	chr13-4770997-4772043	0
chr6-94186525-94187330	0.0171097	0.134502	0.075	0.053	1	ENSMUST00000089317	Magi1	ENSMUSG00000045095	protein_coding	gap	chr6-93943321-94283009	chr6-94186525-94187330	0
chr18-55087303-55088059	0.0171283	-0.283175	0.027	0.086	1	ENSMUST00000181765	Gm4221	ENSMUSG00000096948	lincRNA	exon	chr18-55076479-55079414	chr18-55087303-55088059	7888
chr1-153641413-153642519	0.0171515	0.17362	0.075	0.045	1	ENSMUST00000041776	Rgs8	ENSMUSG00000042671	protein_coding	exon	chr1-153653025-153653355	chr1-153641413-153642519	10505
chr5-111217369-111217792	0.0171694	-0.300359	0.03	0.088	1	ENSMUST00000156290	Ttc28	ENSMUSG00000033209	protein_coding	gap	chr5-111183432-111223109	chr5-111217369-111217792	0
chr18-76943433-76944654	0.0171888	-0.177999	0.142	0.288	1	ENSMUST00000142456	Hdhd2	ENSMUSG00000025421	protein_coding	cds	chr18-76944043-76944185	chr18-76943433-76944654	0
chr16-18720505-18721005	0.0172047	-0.347293	0.027	0.091	1	ENSMUST00000043577	Cldn5	ENSMUSG00000041378	protein_coding	exon	chr16-18776847-18778260	chr16-18720505-18721005	55841
chr4-128891095-128891745	0.0172215	-0.28309	0.125	0.232	1	ENSMUST00000147852	Trim62	ENSMUSG00000041000	protein_coding	gap	chr4-128886787-128896819	chr4-128891095-128891745	0
chr3-126608825-126610352	0.0172349	-0.186848	0.045	0.134	1	ENSMUST00000171289	Camk2d	ENSMUSG00000053819	protein_coding	gap	chr3-126599161-126684659	chr3-126608825-126610352	0
chr7-83891354-83892719	0.0172387	-0.105333	0.515	0.636	1	ENSMUST00000153377	Mesdc2	ENSMUSG00000038503	protein_coding	cds	chr7-83892330-83892562	chr7-83891354-83892719	0
chr5-142821401-142822029	0.0172447	0.101949	0.168	0.172	1	ENSMUST00000151477	Tnrc18	ENSMUSG00000039477	protein_coding	exon	chr5-142817272-142817662	chr5-142821401-142822029	3738
chr4-102821507-102822050	0.0172593	-0.279191	0.025	0.078	1	ENSMUST00000183855	Sgip1	ENSMUSG00000028524	protein_coding	gap	chr4-102760566-102852882	chr4-102821507-102822050	0
chr12-32854894-32855151	0.0172732	0.138898	0.05	0.03	1	ENSMUST00000020886	Nampt	ENSMUSG00000020572	protein_coding	utr	chr12-32850534-32853369	chr12-32854894-32855151	1524
chr16-85747609-85748370	0.0172887	-0.255701	0.078	0.174	1	ENSMUST00000023610	Adamts1	ENSMUSG00000022893	protein_coding	utr	chr16-85793827-85795400	chr16-85747609-85748370	45456
chr8-125558244-125559520	0.0173089	-0.180295	0.078	0.199	1	ENSMUST00000108775	Sipa1l2	ENSMUSG00000001995	protein_coding	exon	chr8-125491111-125492710	chr8-125558244-125559520	65533
chr5-142478611-142479283	0.0173165	0.122471	0.093	0.076	1	ENSMUST00000038699	Ap5z1	ENSMUSG00000039623	protein_coding	utr	chr5-142477487-142478715	chr5-142478611-142479283	0
chr2-102400291-102401612	0.0173194	-0.186169	0.127	0.263	1	ENSMUST00000102573	Trim44	ENSMUSG00000027189	protein_coding	cds	chr2-102400013-102400684	chr2-102400291-102401612	0
chr4-82304081-82305041	0.0173238	-0.254025	0.043	0.114	1	ENSMUST00000107248	Nfib	ENSMUSG00000008575	protein_coding	gap	chr4-82296812-82310302	chr4-82304081-82305041	0
chr7-19307465-19308926	0.0173312	0.104617	0.427	0.422	1	ENSMUST00000003640	Fosb	ENSMUSG00000003545	protein_coding	gap	chr7-19307441-19309305	chr7-19307465-19308926	0
chr5-148740332-148742025	0.0173534	-0.194072	0.068	0.174	1	ENSMUST00000150265	2210417A02Rik	ENSMUSG00000086494	lincRNA	gap	chr5-148741985-148742734	chr5-148740332-148742025	0
chr11-95258174-95259893	0.0173543	-0.162191	0.338	0.472	1	ENSMUST00000021242	Tac4	ENSMUSG00000020872	protein_coding	exon	chr11-95261529-95261819	chr11-95258174-95259893	1635
chr5-113122224-113122931	0.0173837	0.125072	0.092	0.078	1	ENSMUST00000050125	2900026A02Rik	ENSMUSG00000051339	protein_coding	gap	chr5-113101578-113163057	chr5-113122224-113122931	0
chr5-121838537-121839091	0.0174412	-0.195873	0.105	0.237	1	ENSMUST00000086310	Sh2b3	ENSMUSG00000042594	protein_coding	exon	chr5-121836550-121836859	chr5-121838537-121839091	1677
chr9-47508130-47508528	0.0174738	-0.324428	0.023	0.083	1	ENSMUST00000114548	Cadm1	ENSMUSG00000032076	protein_coding	exon	chr9-47530173-47530505	chr9-47508130-47508528	21644
chr7-65370312-65371720	0.0175043	-0.225052	0.178	0.306	1	ENSMUST00000102592	Tjp1	ENSMUSG00000030516	protein_coding	cds	chr7-65370810-65370836	chr7-65370312-65371720	0
chr19-6398409-6400662	0.017537	-0.153752	0.315	0.462	1	ENSMUST00000167240	Rasgrp2	ENSMUSG00000032946	protein_coding	utr	chr19-6400583-6400651	chr19-6398409-6400662	0
chr11-88180353-88181663	0.0175751	0.102436	0.167	0.152	1	ENSMUST00000154812	Cuedc1	ENSMUSG00000018378	protein_coding	gap	chr11-88177398-88182480	chr11-88180353-88181663	0
chr17-47167919-47168392	0.0175788	-0.275488	0.025	0.083	1	ENSMUST00000191153	Trerf1	ENSMUSG00000064043	processed_transcript	gap	chr17-47141910-47230229	chr17-47167919-47168392	0
chr7-132347329-132348328	0.0175841	-0.175228	0.017	0.058	1	ENSMUST00000124096	Fgfr2	ENSMUSG00000030849	protein_coding	gap	chr7-130172940-133081756	chr7-132347329-132348328	0
chr10-44861245-44862348	0.017618	-0.340056	0.075	0.162	1	ENSMUST00000185159	Gm27977	ENSMUSG00000098642	rRNA	exon	chr10-44668384-44668494	chr10-44861245-44862348	192750
chr1-38626865-38628053	0.0176275	-0.251574	0.072	0.192	1	ENSMUST00000095027	Aff3	ENSMUSG00000037138	protein_coding	cds	chr1-38627089-38627141	chr1-38626865-38628053	0
chr17-9921316-9921762	0.0176408	-0.280342	0.022	0.083	1	ENSMUST00000057190	Pabpc6	ENSMUSG00000046173	protein_coding	exon	chr17-9666497-9669704	chr17-9921316-9921762	251611
chr5-62755645-62756448	0.0176565	-0.170905	0.017	0.088	1	ENSMUST00000159470	Arap2	ENSMUSG00000037999	protein_coding	gap	chr5-62749817-62765519	chr5-62755645-62756448	0
chr1-190664794-190665032	0.0176589	0.234272	0.078	0.048	1	ENSMUST00000159624	Rps6kc1	ENSMUSG00000089872	protein_coding	utr	chr1-190700202-190700420	chr1-190664794-190665032	35169
chr1-89454079-89455169	0.0177596	-0.209015	0.203	0.336	1	ENSMUST00000190096	Agap1	ENSMUSG00000055013	protein_coding	utr	chr1-89454874-89455429	chr1-89454079-89455169	0
chr2-154612776-154614210	0.017787	-0.162765	0.27	0.417	1	ENSMUST00000181369	4930519P11Rik	ENSMUSG00000097602	protein_coding	cds	chr2-154612937-154613437	chr2-154612776-154614210	0
chr2-26573160-26573725	0.0177926	0.135602	0.163	0.152	1	ENSMUST00000152713	Egfl7	ENSMUSG00000026921	protein_coding	exon	chr2-26580014-26580109	chr2-26573160-26573725	6288
chr10-75588401-75588600	0.0178061	-0.198699	0.025	0.071	1	ENSMUST00000072217	Ggt5	ENSMUSG00000006344	protein_coding	exon	chr10-75589340-75589882	chr10-75588401-75588600	739
chr10-21636456-21637082	0.0178083	0.138833	0.1	0.081	1	ENSMUST00000057341	1700020N01Rik	ENSMUSG00000050844	protein_coding	utr	chr10-21621726-21622376	chr10-21636456-21637082	14079
chr15-74919524-74920024	0.0178532	-0.210654	0.095	0.217	1	ENSMUST00000190826	2010109I03Rik	ENSMUSG00000063522	protein_coding	exon	chr15-74896956-74897021	chr15-74919524-74920024	22502
chr13-29177823-29178351	0.0178988	0.196281	0.067	0.043	1	ENSMUST00000140278	Cdkal1	ENSMUSG00000006191	protein_coding	utr	chr13-29191746-29193146	chr13-29177823-29178351	13394
chr2-137114152-137115096	0.0179382	-0.190006	0.243	0.381	1	ENSMUST00000028735	Jag1	ENSMUSG00000027276	protein_coding	gap	chr2-137106919-137115403	chr2-137114152-137115096	0
chr9-120743500-120743744	0.0179747	-0.292589	0.015	0.058	1	ENSMUST00000064646	5830454E08Rik	ENSMUSG00000052658	protein_coding	utr	chr9-120577709-120578072	chr9-120743500-120743744	165427
chr9-115422514-115423072	0.0180399	-0.362646	0.037	0.119	1	ENSMUST00000035010	Stt3b	ENSMUSG00000032437	protein_coding	exon	chr9-115309752-115310421	chr9-115422514-115423072	112092
chr9-119981313-119984073	0.0180504	-0.152213	0.33	0.485	1	ENSMUST00000177637	Cx3cr1	ENSMUSG00000052336	protein_coding	gap	chr9-119901628-120049278	chr9-119981313-119984073	0
chr6-120090928-120091242	0.0180966	0.211826	0.082	0.051	1	ENSMUST00000112711	Ninj2	ENSMUSG00000041377	protein_coding	exon	chr6-120093350-120093458	chr6-120090928-120091242	2107
chr12-70881175-70882194	0.0181521	0.160497	0.102	0.071	1	ENSMUST00000057859	Frmd6	ENSMUSG00000048285	protein_coding	gap	chr12-70880806-70883665	chr12-70881175-70882194	0
chr6-40435021-40436381	0.0181568	-0.168299	0.078	0.182	1	ENSMUST00000101492	E330009J07Rik	ENSMUSG00000037172	protein_coding	cds	chr6-40435858-40436125	chr6-40435021-40436381	0
chr1-11210478-11211033	0.0181654	-0.346944	0.025	0.096	1	ENSMUST00000027056	Prex2	ENSMUSG00000048960	protein_coding	gap	chr1-11208656-11231681	chr1-11210478-11211033	0
chr5-65106879-65108431	0.0182489	-0.177659	0.273	0.412	1	ENSMUST00000101192	Klhl5	ENSMUSG00000054920	protein_coding	utr	chr5-65107568-65107861	chr5-65106879-65108431	0
chr8-79294305-79295548	0.0182891	-0.132014	0.35	0.497	1	ENSMUST00000048718	Mmaa	ENSMUSG00000037022	protein_coding	utr	chr8-79294914-79294956	chr8-79294305-79295548	0
chr11-76260763-76261713	0.0182896	0.110382	0.147	0.146	1	ENSMUST00000021204	Nxn	ENSMUSG00000020844	protein_coding	cds	chr11-76261542-76261666	chr11-76260763-76261713	0
chr5-53950211-53950464	0.0183273	-0.206647	0.013	0.051	1	ENSMUST00000037337	Tbc1d19	ENSMUSG00000039178	protein_coding	utr	chr5-53903407-53904380	chr5-53950211-53950464	45830
chr4-149790370-149792689	0.018333	-0.166289	0.072	0.162	1	ENSMUST00000142019	Gm16188	ENSMUSG00000085368	lincRNA	exon	chr4-149783089-149783332	chr4-149790370-149792689	7037
chr13-113851660-113852422	0.0183333	-0.354418	0.042	0.119	1	ENSMUST00000091201	Arl15	ENSMUSG00000042348	protein_coding	gap	chr13-113794697-113922246	chr13-113851660-113852422	0
chr14-66810990-66811271	0.0183408	-0.18381	0.022	0.068	1	ENSMUST00000022629	Dpysl2	ENSMUSG00000022048	protein_coding	gap	chr14-66808042-66813125	chr14-66810990-66811271	0
chr11-107427908-107428422	0.0183841	-0.177641	0.038	0.121	1	ENSMUST00000103064	Pitpnc1	ENSMUSG00000040430	protein_coding	gap	chr11-107337561-107469890	chr11-107427908-107428422	0
chr12-117763148-117763462	0.0183889	-0.294644	0.04	0.109	1	ENSMUST00000109691	Rapgef5	ENSMUSG00000041992	protein_coding	utr	chr12-117756082-117756978	chr12-117763148-117763462	6169
chr2-163595870-163596725	0.0184523	0.137182	0.14	0.126	1	ENSMUST00000171696	Ttpal	ENSMUSG00000017679	protein_coding	exon	chr2-163602314-163602414	chr2-163595870-163596725	5588
chrX-99241412-99242142	0.0184524	-0.291623	0.028	0.088	1	ENSMUST00000052839	Efnb1	ENSMUSG00000031217	protein_coding	utr	chrX-99147528-99148991	chrX-99241412-99242142	92420
chr13-34651004-34651295	0.0184981	-0.209622	0.03	0.091	1	ENSMUST00000125037	Pxdc1	ENSMUSG00000021411	protein_coding	gap	chr13-34639099-34652179	chr13-34651004-34651295	0
chr18-5428362-5428955	0.0185097	-0.293923	0.048	0.126	1	ENSMUST00000161921	Gm10125	ENSMUSG00000063087	processed_transcript	exon	chr18-5491503-5492097	chr18-5428362-5428955	62547
chr10-77583555-77584319	0.0185106	-0.242994	0.093	0.187	1	ENSMUST00000161165	Pttg1ip	ENSMUSG00000009291	protein_coding	cds	chr10-77584005-77584023	chr10-77583555-77584319	0
chr8-79349728-79350666	0.0185213	0.146525	0.128	0.101	1	ENSMUST00000109885	Smad1	ENSMUSG00000031681	protein_coding	cds	chr8-79349591-79349812	chr8-79349728-79350666	0
chr12-117663567-117664065	0.0185412	-0.359292	0.055	0.144	1	ENSMUST00000109691	Rapgef5	ENSMUSG00000041992	protein_coding	gap	chr12-117658404-117688563	chr12-117663567-117664065	0
chr11-109246596-109247334	0.0185931	-0.201949	0.03	0.093	1	ENSMUST00000156785	Rgs9	ENSMUSG00000020599	protein_coding	gap	chr11-109246569-109246654	chr11-109246596-109247334	0
chr6-112333998-112334961	0.0185944	-0.203848	0.023	0.063	1	ENSMUST00000032376	Lmcd1	ENSMUSG00000057604	protein_coding	utr	chr6-112329967-112330425	chr6-112333998-112334961	3572
chr2-124858084-124858948	0.0186126	-0.336053	0.167	0.303	1	ENSMUST00000137397	Gm13994	ENSMUSG00000087450	lincRNA	exon	chr2-124711013-124711083	chr2-124858084-124858948	147000
chr14-25401447-25402723	0.0186318	-0.329404	0.103	0.225	1	ENSMUST00000181582	Gm26660	ENSMUSG00000097601	lincRNA	exon	chr14-25378434-25378635	chr14-25401447-25402723	22811
chr16-32113211-32114189	0.01869	-0.178503	0.103	0.235	1	ENSMUST00000115168	Cep19	ENSMUSG00000035790	protein_coding	utr	chr16-32107268-32108069	chr16-32113211-32114189	5141
chr17-26616501-26617058	0.0187082	-0.158192	0.027	0.073	1	ENSMUST00000170640	Ergic1	ENSMUSG00000001576	protein_coding	gap	chr17-26614429-26624589	chr17-26616501-26617058	0
chr5-105609666-105610111	0.0187115	-0.268717	0.027	0.091	1	ENSMUST00000067924	Lrrc8c	ENSMUSG00000054720	protein_coding	utr	chr5-105608773-105613018	chr5-105609666-105610111	0
chr1-181860151-181861575	0.0187211	-0.172199	0.118	0.255	1	ENSMUST00000070987	Gm5533	ENSMUSG00000056699	lincRNA	exon	chr1-181853092-181853189	chr1-181860151-181861575	6961
chr4-80910431-80912229	0.0187502	-0.214031	0.07	0.149	1	ENSMUST00000055922	Lurap1l	ENSMUSG00000048706	protein_coding	cds	chr4-80911355-80911645	chr4-80910431-80912229	0
chr6-31563340-31564395	0.0187756	-0.244616	0.213	0.341	1	ENSMUST00000026698	Podxl	ENSMUSG00000025608	protein_coding	cds	chr6-31563579-31563648	chr6-31563340-31564395	0
chr5-29377504-29378889	0.0187835	-0.180236	0.158	0.283	1	ENSMUST00000179191	Lmbr1	ENSMUSG00000010721	protein_coding	cds	chr5-29378127-29378192	chr5-29377504-29378889	0
chr1-195016581-195017497	0.0188104	-0.201641	0.058	0.131	1	ENSMUST00000181947	A330023F24Rik	ENSMUSG00000096929	lincRNA	gap	chr1-194976458-195018547	chr1-195016581-195017497	0
chr6-71143276-71144527	0.0188248	-0.205565	0.082	0.177	1	ENSMUST00000160918	Thnsl2	ENSMUSG00000054474	protein_coding	utr	chr6-71144291-71144346	chr6-71143276-71144527	0
chr7-67371800-67373760	0.0188364	-0.149063	0.363	0.49	1	ENSMUST00000156690	Mef2a	ENSMUSG00000030557	protein_coding	utr	chr7-67372713-67372858	chr7-67371800-67373760	0
chr11-101881400-101882041	0.0188432	0.1159	0.122	0.114	1	ENSMUST00000057054	Meox1	ENSMUSG00000001493	protein_coding	gap	chr11-101879437-101893542	chr11-101881400-101882041	0
chr6-51208861-51209312	0.0188661	-0.150223	0.017	0.056	1	ENSMUST00000180553	Gm26677	ENSMUSG00000097598	lincRNA	exon	chr6-51379710-51379944	chr6-51208861-51209312	170397
chr17-36914753-36915363	0.0189305	-0.190124	0.012	0.061	1	ENSMUST00000078438	Trim31	ENSMUSG00000058063	protein_coding	utr	chr17-36909718-36910214	chr17-36914753-36915363	4538
chr4-148676022-148677185	0.0189538	-0.311747	0.143	0.265	1	ENSMUST00000105698	Gm572	ENSMUSG00000070577	protein_coding	utr	chr4-148671429-148671572	chr4-148676022-148677185	4449
chr15-79396670-79397103	0.0189871	-0.249916	0.057	0.144	1	ENSMUST00000178522	Tmem184b	ENSMUSG00000009035	protein_coding	gap	chr15-79378714-79402846	chr15-79396670-79397103	0
chr16-38668727-38669531	0.0190077	-0.315584	0.07	0.154	1	ENSMUST00000132697	Arhgap31	ENSMUSG00000022799	protein_coding	gap	chr16-38640350-38712573	chr16-38668727-38669531	0
chr18-12294876-12295230	0.0190091	-0.226375	0.023	0.063	1	ENSMUST00000142066	Ankrd29	ENSMUSG00000057766	protein_coding	gap	chr18-12282402-12305610	chr18-12294876-12295230	0
chr15-86188829-86189434	0.0190331	-0.238186	0.15	0.273	1	ENSMUST00000044332	Cerk	ENSMUSG00000035891	protein_coding	exon	chr15-86185507-86186141	chr15-86188829-86189434	2687
chr15-9139862-9141258	0.0190478	-0.166	0.223	0.341	1	ENSMUST00000110585	Skp2	ENSMUSG00000054115	protein_coding	cds	chr15-9140184-9140191	chr15-9139862-9141258	0
chr14-78848582-78850167	0.0192156	-0.194423	0.12	0.247	1	ENSMUST00000040990	Vwa8	ENSMUSG00000058997	protein_coding	cds	chr14-78849284-78849443	chr14-78848582-78850167	0
chr5-147724993-147727305	0.0192214	-0.252766	0.123	0.237	1	ENSMUST00000110529	Flt1	ENSMUSG00000029648	protein_coding	cds	chr5-147725671-147725734	chr5-147724993-147727305	0
chr4-43038910-43040601	0.0192405	-0.143704	0.338	0.485	1	ENSMUST00000152846	Fam214b	ENSMUSG00000036002	protein_coding	utr	chr4-43040274-43040295	chr4-43038910-43040601	0
chr7-27501512-27501996	0.0192591	-0.312457	0.077	0.157	1	ENSMUST00000108355	Prx	ENSMUSG00000053198	protein_coding	gap	chr7-27499366-27504532	chr7-27501512-27501996	0
chr11-102026360-102027449	0.0192811	-0.271296	0.112	0.232	1	ENSMUST00000107167	Mpp3	ENSMUSG00000052373	protein_coding	utr	chr11-102026867-102026937	chr11-102026360-102027449	0
chr18-12128109-12129249	0.0193209	-0.171294	0.237	0.396	1	ENSMUST00000025270	Riok3	ENSMUSG00000024404	protein_coding	cds	chr18-12128911-12128973	chr18-12128109-12129249	0
chr15-95827434-95829243	0.0193668	-0.23934	0.077	0.182	1	ENSMUST00000168960	Gm17546	ENSMUSG00000078648	protein_coding	gap	chr15-95825044-95829925	chr15-95827434-95829243	0
chr13-80898302-80899386	0.0193698	0.113013	0.05	0.025	1	ENSMUST00000159690	Arrdc3	ENSMUSG00000074794	protein_coding	utr	chr13-80893370-80896035	chr13-80898302-80899386	2266
chr10-68625260-68626032	0.0193933	-0.257381	0.027	0.076	1	ENSMUST00000020103	1700040L02Rik	ENSMUSG00000019945	protein_coding	exon	chr10-68541747-68541896	chr10-68625260-68626032	83363
chr7-89841635-89842414	0.0193991	-0.203609	0.053	0.114	1	ENSMUST00000159167	Me3	ENSMUSG00000030621	protein_coding	gap	chr7-89833807-89845794	chr7-89841635-89842414	0
chr2-129632905-129633751	0.0194055	-0.185084	0.082	0.169	1	ENSMUST00000103203	Sirpa	ENSMUSG00000037902	protein_coding	utr	chr2-129630185-129632228	chr2-129632905-129633751	676
chr12-4592036-4593966	0.0194063	-0.192083	0.12	0.27	1	ENSMUST00000170816	Gm3625	ENSMUSG00000091619	protein_coding	cds	chr12-4592826-4592927	chr12-4592036-4593966	0
chr3-103057780-103058843	0.0194494	-0.193098	0.165	0.298	1	ENSMUST00000029446	Csde1	ENSMUSG00000068823	protein_coding	utr	chr3-103056934-103058189	chr3-103057780-103058843	0
chr5-113225185-113225469	0.019453	-0.237408	0.027	0.078	1	ENSMUST00000086615	Tmem211	ENSMUSG00000066964	protein_coding	exon	chr5-113226909-113227001	chr5-113225185-113225469	1439
chr7-108943709-108944332	0.0194823	-0.159828	0.017	0.058	1	ENSMUST00000033342	Eif3f	ENSMUSG00000031029	protein_coding	utr	chr7-108941539-108942951	chr7-108943709-108944332	757
chr8-33929008-33931865	0.0195249	-0.176441	0.265	0.412	1	ENSMUST00000191473	Rbpms	ENSMUSG00000031586	protein_coding	cds	chr8-33929476-33929541	chr8-33929008-33931865	0
chr2-166712161-166714395	0.0196282	-0.132849	0.362	0.51	1	ENSMUST00000036719	Prex1	ENSMUSG00000039621	protein_coding	cds	chr2-166713515-166713718	chr2-166712161-166714395	0
chr11-90099142-90099546	0.0198015	-0.225622	0.017	0.063	1	ENSMUST00000142279	Gm11494	ENSMUSG00000085074	lincRNA	exon	chr11-90134842-90136235	chr11-90099142-90099546	35295
chr12-112155574-112156019	0.0198172	0.125755	0.095	0.088	1	ENSMUST00000128402	Kif26a	ENSMUSG00000021294	protein_coding	gap	chr12-112146957-112157247	chr12-112155574-112156019	0
chr14-74913377-74914139	0.0198206	-0.199138	0.045	0.111	1	ENSMUST00000088970	Lrch1	ENSMUSG00000068015	protein_coding	gap	chr14-74858122-74947383	chr14-74913377-74914139	0
chr18-38874772-38875113	0.019821	-0.293803	0.028	0.073	1	ENSMUST00000148850	Arhgap26	ENSMUSG00000036452	protein_coding	gap	chr18-38676806-38933792	chr18-38874772-38875113	0
chr3-79237371-79238256	0.0198253	-0.163147	0.072	0.182	1	ENSMUST00000195708	Rapgef2	ENSMUSG00000062232	protein_coding	gap	chr3-79215028-79286463	chr3-79237371-79238256	0
chr12-101764902-101765227	0.0198312	0.207372	0.132	0.093	1	ENSMUST00000021603	Fbln5	ENSMUSG00000021186	protein_coding	cds	chr12-101765156-101765275	chr12-101764902-101765227	0
chr4-131743573-131744968	0.0198662	-0.297703	0.145	0.27	1	ENSMUST00000105987	Ptpru	ENSMUSG00000028909	protein_coding	utr	chr4-131768457-131769497	chr4-131743573-131744968	23488
chr9-65036532-65036732	0.019883	0.179077	0.063	0.038	1	ENSMUST00000167773	Dpp8	ENSMUSG00000032393	protein_coding	gap	chr9-65035012-65036968	chr9-65036532-65036732	0
chr4-149875315-149875750	0.0198835	0.138972	0.127	0.114	1	ENSMUST00000038562	Spsb1	ENSMUSG00000039911	protein_coding	utr	chr4-149896283-149898213	chr4-149875315-149875750	20532
chr10-94501831-94502085	0.0198996	-0.279915	0.023	0.071	1	ENSMUST00000132743	Tmcc3	ENSMUSG00000020023	protein_coding	gap	chr10-94430640-94578422	chr10-94501831-94502085	0
chr7-80992686-80994240	0.0199435	-0.172715	0.27	0.407	1	ENSMUST00000107353	Zfp592	ENSMUSG00000005621	protein_coding	utr	chr7-80993681-80993762	chr7-80992686-80994240	0
chr5-21440752-21441599	0.0199437	-0.173786	0.018	0.076	1	ENSMUST00000146056	Fam185a	ENSMUSG00000047221	protein_coding	gap	chr5-21438839-21447315	chr5-21440752-21441599	0
chr13-23453137-23454216	0.0199475	-0.176989	0.075	0.169	1	ENSMUST00000041674	Btn1a1	ENSMUSG00000000706	protein_coding	utr	chr13-23456992-23458702	chr13-23453137-23454216	2775
chr5-35722700-35723129	0.0199529	-0.223284	0.033	0.086	1	ENSMUST00000127288	Sh3tc1	ENSMUSG00000036553	protein_coding	gap	chr5-35721605-35723913	chr5-35722700-35723129	0
chr7-31125227-31125679	0.0199576	0.108297	0.05	0.033	1	ENSMUST00000188002	Scn1b	ENSMUSG00000019194	protein_coding	gap	chr7-31125222-31126665	chr7-31125227-31125679	0
chr13-13453096-13453848	0.0200717	-0.141389	0.01	0.066	1	ENSMUST00000005532	Nid1	ENSMUSG00000005397	protein_coding	gap	chr13-13437927-13463721	chr13-13453096-13453848	0
chr9-119977828-119978707	0.0200718	-0.153996	0.053	0.149	1	ENSMUST00000177637	Cx3cr1	ENSMUSG00000052336	protein_coding	gap	chr9-119901628-120049278	chr9-119977828-119978707	0
chr11-90044174-90044788	0.0201423	-0.321809	0.045	0.111	1	ENSMUST00000092788	Tmem100	ENSMUSG00000069763	protein_coding	utr	chr11-90035754-90036508	chr11-90044174-90044788	7665
chr19-24673310-24673998	0.0201977	-0.314915	0.058	0.139	1	ENSMUST00000057243	Tmem252	ENSMUSG00000048572	protein_coding	exon	chr19-24674008-24674343	chr19-24673310-24673998	9
chr7-82174465-82175227	0.0202301	0.149479	0.098	0.076	1	ENSMUST00000180243	Sh3gl3	ENSMUSG00000030638	protein_coding	cds	chr7-82175156-82175316	chr7-82174465-82175227	0
chr11-53768568-53770818	0.0202485	-0.15158	0.297	0.447	1	ENSMUST00000142221	Irf1	ENSMUSG00000018899	protein_coding	utr	chr11-53770105-53770278	chr11-53768568-53770818	0
chr8-68416620-68417035	0.0202682	-0.325762	0.035	0.098	1	ENSMUST00000136060	Csgalnact1	ENSMUSG00000036356	protein_coding	gap	chr8-68401520-68460923	chr8-68416620-68417035	0
chr3-146875611-146876312	0.0202986	-0.218194	0.032	0.086	1	ENSMUST00000170055	Ttll7	ENSMUSG00000036745	protein_coding	gap	chr3-146852590-146894001	chr3-146875611-146876312	0
chr7-19295524-19296125	0.0203797	-0.184627	0.083	0.169	1	ENSMUST00000108468	Rtn2	ENSMUSG00000030401	protein_coding	cds	chr7-19295716-19295794	chr7-19295524-19296125	0
chr17-31409362-31409999	0.0204438	-0.283903	0.025	0.088	1	ENSMUST00000154567	Pde9a	ENSMUSG00000041119	protein_coding	gap	chr17-31386357-31414100	chr17-31409362-31409999	0
chr19-40431876-40432422	0.0204531	-0.204087	0.033	0.096	1	ENSMUST00000099466	Sorbs1	ENSMUSG00000025006	protein_coding	exon	chr19-40402258-40402267	chr19-40431876-40432422	29608
chr19-47512724-47513275	0.0204862	-0.237109	0.057	0.169	1	ENSMUST00000182808	Obfc1	ENSMUSG00000042694	protein_coding	gap	chr19-47510458-47513810	chr19-47512724-47513275	0
chr2-128966614-128968432	0.0205223	-0.174822	0.252	0.409	1	ENSMUST00000110320	Zc3h6	ENSMUSG00000042851	protein_coding	cds	chr2-128967805-128967836	chr2-128966614-128968432	0
chr12-64917319-64918574	0.0205411	-0.162829	0.24	0.389	1	ENSMUST00000058135	Gm527	ENSMUSG00000047227	protein_coding	utr	chr12-64917911-64918191	chr12-64917319-64918574	0
chr6-83506033-83507259	0.0206345	-0.163962	0.23	0.374	1	ENSMUST00000145455	Dguok	ENSMUSG00000014554	protein_coding	cds	chr6-83506748-83506843	chr6-83506033-83507259	0
chr15-37688546-37688910	0.0206541	-0.333465	0.032	0.096	1	ENSMUST00000168992	Ncald	ENSMUSG00000051359	protein_coding	gap	chr15-37661087-37791895	chr15-37688546-37688910	0
chr2-61061756-61062574	0.0206694	0.198755	0.163	0.119	1	ENSMUST00000146034	Gm13582	ENSMUSG00000075325	lincRNA	exon	chr2-60975057-60975151	chr2-61061756-61062574	86604
chr11-49754724-49755871	0.0207092	-0.24489	0.05	0.136	1	ENSMUST00000130129	Gfpt2	ENSMUSG00000020363	protein_coding	exon	chr11-49794178-49794243	chr11-49754724-49755871	38306
chr7-125471687-125472776	0.0207948	-0.205016	0.117	0.253	1	ENSMUST00000138616	Nsmce1	ENSMUSG00000030750	protein_coding	cds	chr7-125472108-125472229	chr7-125471687-125472776	0
chr10-95562939-95564750	0.0207968	-0.145221	0.233	0.371	1	ENSMUST00000020217	Nudt4	ENSMUSG00000020029	protein_coding	cds	chr10-95563662-95563757	chr10-95562939-95564750	0
chr8-91990114-91990492	0.0208409	0.267658	0.12	0.073	1	ENSMUST00000190257	Gm28516	ENSMUSG00000101613	lincRNA	exon	chr8-92024442-92024602	chr8-91990114-91990492	33949
chr1-36325344-36326430	0.020847	-0.182322	0.065	0.159	1	ENSMUST00000137906	Arid5a	ENSMUSG00000037447	protein_coding	utr	chr1-36320204-36324029	chr1-36325344-36326430	1314
chr10-24810351-24810996	0.0208564	0.160022	0.068	0.043	1	ENSMUST00000020169	Enpp3	ENSMUSG00000019989	protein_coding	gap	chr10-24809934-24817866	chr10-24810351-24810996	0
chr1-126492427-126493074	0.0208744	-0.217278	0.017	0.056	1	ENSMUST00000162877	Nckap5	ENSMUSG00000049690	protein_coding	utr	chr1-126492548-126492742	chr1-126492427-126493074	0
chr8-72363406-72363754	0.0208985	-0.198441	0.023	0.076	1	ENSMUST00000163643	Eps15l1	ENSMUSG00000006276	protein_coding	gap	chr8-72358446-72367903	chr8-72363406-72363754	0
chr15-95880417-95881210	0.0209025	-0.280654	0.085	0.174	1	ENSMUST00000071874	Ano6	ENSMUSG00000064210	protein_coding	gap	chr15-95864308-95894412	chr15-95880417-95881210	0
chr8-122719631-122720627	0.0209296	-0.237621	0.07	0.157	1	ENSMUST00000127664	Gm20388	ENSMUSG00000092329	protein_coding	gap	chr8-119910940-124295357	chr8-122719631-122720627	0
chr11-51658286-51659474	0.0209611	0.135155	0.105	0.083	1	ENSMUST00000117859	D930048N14Rik	ENSMUSG00000052563	protein_coding	utr	chr11-51654773-51657681	chr11-51658286-51659474	604
chr14-31232965-31234313	0.0209834	-0.271622	0.155	0.295	1	ENSMUST00000090180	Sema3g	ENSMUSG00000021904	protein_coding	utr	chr14-31228207-31230350	chr14-31232965-31234313	2614
chr10-86463414-86464176	0.0210046	0.111492	0.052	0.033	1	ENSMUST00000145864	Syn3	ENSMUSG00000059602	protein_coding	gap	chr10-86448924-86466978	chr10-86463414-86464176	0
chr6-92674385-92674814	0.021045	-0.324795	0.022	0.081	1	ENSMUST00000032093	Prickle2	ENSMUSG00000030020	protein_coding	gap	chr6-92458659-92705345	chr6-92674385-92674814	0
chr15-78834890-78836625	0.0210751	-0.23939	0.158	0.29	1	ENSMUST00000059619	Cdc42ep1	ENSMUSG00000049521	protein_coding	exon	chr15-78842647-78842725	chr15-78834890-78836625	6021
chr14-9393130-9393781	0.0210957	0.129937	0.05	0.03	1	ENSMUST00000161302	Fhit	ENSMUSG00000060579	protein_coding	utr	chr14-9550092-9550392	chr14-9393130-9393781	156310
chr3-65974063-65975646	0.0211439	-0.145514	0.355	0.485	1	ENSMUST00000029416	Ccnl1	ENSMUSG00000027829	protein_coding	exon	chr3-65957808-65958249	chr3-65974063-65975646	15813
chr2-135725231-135725910	0.0211779	-0.218587	0.033	0.091	1	ENSMUST00000146018	Plcb4	ENSMUSG00000039943	protein_coding	gap	chr2-135659731-135741829	chr2-135725231-135725910	0
chr2-138281493-138282069	0.0211811	0.176093	0.098	0.071	1	ENSMUST00000155646	Btbd3	ENSMUSG00000062098	protein_coding	gap	chr2-138256755-138425688	chr2-138281493-138282069	0
chr12-71830187-71832041	0.0212174	-0.142415	0.318	0.475	1	ENSMUST00000085299	Daam1	ENSMUSG00000034574	protein_coding	utr	chr12-71831078-71831331	chr12-71830187-71832041	0
chr13-47017195-47017594	0.0212339	-0.15595	0.013	0.051	1	ENSMUST00000052747	Nhlrc1	ENSMUSG00000044231	protein_coding	exon	chr13-47012558-47014850	chr13-47017195-47017594	2344
chr6-55300698-55301022	0.0212914	-0.271514	0.013	0.058	1	ENSMUST00000053094	Fam188b	ENSMUSG00000038022	protein_coding	cds	chr6-55300943-55301104	chr6-55300698-55301022	0
chr13-113244878-113245443	0.0213193	-0.231092	0.013	0.058	1	ENSMUST00000122399	Gzmk	ENSMUSG00000042385	protein_coding	exon	chr13-113225764-113225908	chr13-113244878-113245443	18969
chr3-86223476-86225470	0.0213619	-0.163031	0.163	0.311	1	ENSMUST00000194759	Lrba	ENSMUSG00000028080	protein_coding	cds	chr3-86225289-86225504	chr3-86223476-86225470	0
chr13-111369939-111370175	0.0213668	-0.255483	0.01	0.051	1	ENSMUST00000132731	Gm6270	ENSMUSG00000086201	lincRNA	exon	chr13-111368263-111368680	chr13-111369939-111370175	1258
chr5-67669256-67669669	0.0213693	-0.190136	0.023	0.066	1	ENSMUST00000135930	Atp8a1	ENSMUSG00000037685	protein_coding	gap	chr5-67667708-67682757	chr5-67669256-67669669	0
chr15-74921301-74921671	0.0213893	-0.22945	0.093	0.177	1	ENSMUST00000190826	2010109I03Rik	ENSMUSG00000063522	protein_coding	exon	chr15-74896956-74897021	chr15-74921301-74921671	24279
chr12-16847184-16847733	0.0213933	-0.315719	0.117	0.225	1	ENSMUST00000020908	E2f6	ENSMUSG00000057469	protein_coding	utr	chr12-16825385-16826743	chr12-16847184-16847733	20440
chr1-60565174-60567354	0.0214318	-0.16119	0.297	0.422	1	ENSMUST00000142258	Raph1	ENSMUSG00000026014	protein_coding	utr	chr1-60567054-60567104	chr1-60565174-60567354	0
chr5-147707445-147707839	0.0214343	-0.28194	0.027	0.081	1	ENSMUST00000110529	Flt1	ENSMUSG00000029648	protein_coding	gap	chr5-147700418-147725670	chr5-147707445-147707839	0
chr6-37785381-37786210	0.0214348	-0.210678	0.02	0.056	1	ENSMUST00000031859	Trim24	ENSMUSG00000029833	protein_coding	exon	chr6-37870811-37871474	chr6-37785381-37786210	84600
chr7-101258497-101258872	0.0214378	-0.217865	0.017	0.063	1	ENSMUST00000098250	Fchsd2	ENSMUSG00000030691	protein_coding	gap	chr7-101253635-101259611	chr7-101258497-101258872	0
chr11-109598720-109599462	0.0214496	0.189479	0.113	0.081	1	ENSMUST00000106689	Wipi1	ENSMUSG00000041895	protein_coding	gap	chr11-109597200-109603672	chr11-109598720-109599462	0
chr6-87778695-87779703	0.0214565	0.104381	0.063	0.045	1	ENSMUST00000032133	Gp9	ENSMUSG00000030054	protein_coding	cds	chr6-87779005-87779538	chr6-87778695-87779703	0
chr18-76034343-76035742	0.0214685	-0.184146	0.067	0.139	1	ENSMUST00000058997	Zbtb7c	ENSMUSG00000044646	protein_coding	gap	chr18-76011691-76136826	chr18-76034343-76035742	0
chr2-23038920-23040730	0.0214805	-0.145711	0.305	0.444	1	ENSMUST00000178908	Abi1	ENSMUSG00000058835	protein_coding	cds	chr2-23039949-23040065	chr2-23038920-23040730	0
chr17-31453060-31454045	0.0215058	-0.168077	0.018	0.063	1	ENSMUST00000136384	Pde9a	ENSMUSG00000041119	protein_coding	cds	chr17-31453402-31453480	chr17-31453060-31454045	0
chr12-79708403-79708727	0.0215293	-0.199233	0.012	0.051	1	ENSMUST00000079533	Rad51b	ENSMUSG00000059060	protein_coding	utr	chr12-79507730-79508656	chr12-79708403-79708727	199746
chr19-12004669-12004948	0.0215371	-0.144465	0.01	0.053	1	ENSMUST00000025590	Osbp	ENSMUSG00000024687	protein_coding	utr	chr19-11992043-11994105	chr19-12004669-12004948	10563
chr4-95116920-95117777	0.0215562	-0.204216	0.063	0.116	1	ENSMUST00000156086	4930551L18Rik	ENSMUSG00000085377	lincRNA	exon	chr4-95091081-95091419	chr4-95116920-95117777	25500
chr9-72657014-72657259	0.0215576	-0.256574	0.028	0.088	1	ENSMUST00000034740	Nedd4	ENSMUSG00000032216	protein_coding	exon	chr9-72662346-72662613	chr9-72657014-72657259	5086
chr10-12781322-12782051	0.0215586	-0.304934	0.052	0.121	1	ENSMUST00000076817	Utrn	ENSMUSG00000019820	protein_coding	gap	chr10-12765333-12861567	chr10-12781322-12782051	0
chr9-66270048-66270277	0.0215602	0.176732	0.053	0.03	1	ENSMUST00000129778	Dapk2	ENSMUSG00000032380	protein_coding	gap	chr9-66268951-66271626	chr9-66270048-66270277	0
chr5-96792349-96794692	0.021578	-0.204103	0.09	0.182	1	ENSMUST00000031447	Anxa3	ENSMUSG00000029484	protein_coding	utr	chr5-96793385-96793563	chr5-96792349-96794692	0
chr9-53770841-53772530	0.0215791	-0.138685	0.017	0.068	1	ENSMUST00000048670	Slc35f2	ENSMUSG00000042195	protein_coding	cds	chr9-53771785-53771894	chr9-53770841-53772530	0
chr11-96413187-96414275	0.0216263	-0.24616	0.122	0.227	1	ENSMUST00000153012	Gm11529	ENSMUSG00000075586	processed_transcript	exon	chr11-96448323-96448457	chr11-96413187-96414275	34047
chr10-107725445-107726279	0.0216335	-0.226675	0.013	0.066	1	ENSMUST00000050702	Ptprq	ENSMUSG00000035916	protein_coding	exon	chr10-107719819-107720051	chr10-107725445-107726279	5393
chr5-119669841-119671698	0.0216834	-0.215356	0.19	0.338	1	ENSMUST00000121021	Tbx3	ENSMUSG00000018604	protein_coding	utr	chr5-119671233-119672015	chr5-119669841-119671698	0
chr6-30302886-30304879	0.0217008	-0.173933	0.187	0.336	1	ENSMUST00000102993	Ube2h	ENSMUSG00000039159	protein_coding	cds	chr6-30304052-30304104	chr6-30302886-30304879	0
chr16-18717784-18718353	0.0217285	-0.340613	0.062	0.149	1	ENSMUST00000043577	Cldn5	ENSMUSG00000041378	protein_coding	exon	chr16-18776847-18778260	chr16-18717784-18718353	58493
chr2-52071951-52073648	0.0217579	-0.185778	0.145	0.295	1	ENSMUST00000112693	Rif1	ENSMUSG00000036202	protein_coding	cds	chr2-52073150-52073253	chr2-52071951-52073648	0
chr11-20111906-20113671	0.0217987	-0.14311	0.347	0.48	1	ENSMUST00000000137	Actr2	ENSMUSG00000020152	protein_coding	cds	chr11-20112805-20112852	chr11-20111906-20113671	0
chr5-119449063-119449588	0.021854	-0.233304	0.025	0.068	1	ENSMUST00000122599	n-R5s175	ENSMUSG00000084548	rRNA	exon	chr5-119297245-119297361	chr5-119449063-119449588	151701
chr4-95385471-95386084	0.0218595	-0.272647	0.058	0.141	1	ENSMUST00000187014	Gm29064	ENSMUSG00000100129	lincRNA	exon	chr4-95401978-95402790	chr4-95385471-95386084	15893
chr10-94544943-94546175	0.0218984	-0.211524	0.11	0.245	1	ENSMUST00000148823	Tmcc3	ENSMUSG00000020023	protein_coding	cds	chr10-94545431-94545568	chr10-94544943-94546175	0
chr4-101118370-101118665	0.0219393	-0.263948	0.01	0.051	1	ENSMUST00000106955	Raver2	ENSMUSG00000035275	protein_coding	gap	chr4-101107395-101120452	chr4-101118370-101118665	0
chr3-32528904-32529974	0.0219409	-0.171609	0.192	0.341	1	ENSMUST00000147350	Mfn1	ENSMUSG00000027668	protein_coding	utr	chr3-32529539-32529560	chr3-32528904-32529974	0
chr2-91953672-91954159	0.0219448	-0.261216	0.073	0.157	1	ENSMUST00000142231	Dgkz	ENSMUSG00000040479	protein_coding	gap	chr2-91942685-91965419	chr2-91953672-91954159	0
chr17-23739296-23741006	0.0219651	-0.187678	0.167	0.311	1	ENSMUST00000024702	Paqr4	ENSMUSG00000023909	protein_coding	cds	chr17-23739860-23740025	chr17-23739296-23741006	0
chr6-88152063-88152513	0.0219696	-0.333469	0.112	0.217	1	ENSMUST00000170089	Gata2	ENSMUSG00000015053	protein_coding	exon	chr6-88193891-88194000	chr6-88152063-88152513	41377
chr13-20231956-20232553	0.0219732	-0.196982	0.025	0.078	1	ENSMUST00000181429	Elmo1	ENSMUSG00000041112	protein_coding	gap	chr13-20209212-20241572	chr13-20231956-20232553	0
chr1-36470857-36472291	0.0219881	-0.166737	0.23	0.371	1	ENSMUST00000153128	Cnnm4	ENSMUSG00000037408	protein_coding	cds	chr1-36471693-36473085	chr1-36470857-36472291	0
chr1-112457459-112457681	0.0219953	-0.145594	0.018	0.058	1	ENSMUST00000035462	Dsel	ENSMUSG00000038702	protein_coding	exon	chr1-111864095-111864918	chr1-112457459-112457681	592540
chr7-83580967-83581363	0.0220484	0.15886	0.055	0.028	1	ENSMUST00000163297	Tmc3	ENSMUSG00000038540	protein_coding	exon	chr7-83584927-83585180	chr7-83580967-83581363	3563
chr1-64087799-64089037	0.0220619	-0.235387	0.092	0.202	1	ENSMUST00000135075	Klf7	ENSMUSG00000025959	protein_coding	gap	chr1-64079335-64120899	chr1-64087799-64089037	0
chr2-137200045-137200462	0.0220698	-0.261768	0.012	0.051	1	ENSMUST00000185663	Gm28214	ENSMUSG00000099683	lincRNA	exon	chr2-137199394-137199732	chr2-137200045-137200462	312
chr11-90093861-90094487	0.0220959	-0.250705	0.027	0.083	1	ENSMUST00000142279	Gm11494	ENSMUSG00000085074	lincRNA	exon	chr11-90134842-90136235	chr11-90093861-90094487	40354
chr17-57059372-57060834	0.0221135	-0.152922	0.277	0.424	1	ENSMUST00000040280	Slc25a23	ENSMUSG00000046329	protein_coding	cds	chr17-57059521-57059673	chr17-57059372-57060834	0
chr4-32365066-32365550	0.0221598	-0.150912	0.012	0.056	1	ENSMUST00000149201	Bach2	ENSMUSG00000040270	protein_coding	gap	chr4-32317305-32417434	chr4-32365066-32365550	0
chr10-77206359-77207107	0.0222193	0.105377	0.148	0.144	1	ENSMUST00000081654	Col18a1	ENSMUSG00000001435	protein_coding	exon	chr10-77166439-77166548	chr10-77206359-77207107	39810
chr7-111741503-111741931	0.0222593	-0.325361	0.09	0.172	1	ENSMUST00000106663	Galnt18	ENSMUSG00000038296	protein_coding	gap	chr7-111616485-111779312	chr7-111741503-111741931	0
chr18-61210857-61211946	0.0222754	-0.156879	0.242	0.391	1	ENSMUST00000148829	Slc26a2	ENSMUSG00000034320	protein_coding	utr	chr18-61211115-61211380	chr18-61210857-61211946	0
chr15-38259146-38260100	0.0222771	-0.203641	0.022	0.076	1	ENSMUST00000180823	Gm8705	ENSMUSG00000097376	lincRNA	exon	chr15-38244425-38244976	chr15-38259146-38260100	14169
chr5-76139694-76141009	0.0222809	-0.158058	0.24	0.391	1	ENSMUST00000031143	Srd5a3	ENSMUSG00000029233	protein_coding	cds	chr5-76140328-76140548	chr5-76139694-76141009	0
chr3-85573564-85574660	0.0222973	-0.164329	0.252	0.369	1	ENSMUST00000127348	Gatb	ENSMUSG00000028085	protein_coding	cds	chr3-85574144-85574319	chr3-85573564-85574660	0
chr5-31467651-31468314	0.0223069	0.155464	0.17	0.149	1	ENSMUST00000076264	Zfp512	ENSMUSG00000062761	protein_coding	cds	chr5-31468154-31468240	chr5-31467651-31468314	0
chr15-77762064-77762350	0.0223117	-0.132565	0.017	0.061	1	ENSMUST00000016771	Myh9	ENSMUSG00000022443	protein_coding	gap	chr15-77762017-77762951	chr15-77762064-77762350	0
chr16-92399539-92400557	0.022329	-0.234145	0.145	0.273	1	ENSMUST00000023672	Rcan1	ENSMUSG00000022951	protein_coding	cds	chr16-92399896-92399982	chr16-92399539-92400557	0
chr13-23603282-23603626	0.0224245	-0.298223	0.018	0.076	1	ENSMUST00000091704	Hist1h2be	ENSMUSG00000047246	protein_coding	gap	chr13-23585971-23620915	chr13-23603282-23603626	0
chr17-5893118-5893437	0.0224344	0.133062	0.06	0.043	1	ENSMUST00000002436	Snx9	ENSMUSG00000002365	protein_coding	gap	chr17-5891900-5899326	chr17-5893118-5893437	0
chr3-149261695-149262942	0.0224878	-0.255873	0.027	0.091	1	ENSMUST00000180599	Gm10287	ENSMUSG00000070342	lincRNA	exon	chr3-149221687-149225745	chr3-149261695-149262942	35949
chr7-45634864-45636099	0.0224981	-0.218398	0.143	0.268	1	ENSMUST00000057927	Rasip1	ENSMUSG00000044562	protein_coding	cds	chr7-45635216-45635331	chr7-45634864-45636099	0
chr7-65421438-65421824	0.0225046	-0.348693	0.065	0.154	1	ENSMUST00000102592	Tjp1	ENSMUSG00000030516	protein_coding	exon	chr7-65370810-65371239	chr7-65421438-65421824	50198
chr7-24498951-24500482	0.0225049	-0.167285	0.022	0.078	1	ENSMUST00000068023	Cadm4	ENSMUSG00000054793	protein_coding	cds	chr7-24500476-24500640	chr7-24498951-24500482	0
chr7-111713824-111714302	0.0225144	-0.306227	0.03	0.086	1	ENSMUST00000106663	Galnt18	ENSMUSG00000038296	protein_coding	gap	chr7-111616485-111779312	chr7-111713824-111714302	0
chr12-85475851-85476716	0.0225334	0.166155	0.205	0.146	1	ENSMUST00000021674	Fos	ENSMUSG00000021250	protein_coding	cds	chr12-85475817-85476458	chr12-85475851-85476716	0
chr19-3951367-3952412	0.0225491	-0.201516	0.033	0.104	1	ENSMUST00000162708	Unc93b1	ENSMUSG00000036908	protein_coding	utr	chr19-3948943-3949340	chr19-3951367-3952412	2026
chr10-121780968-121781636	0.0226146	-0.163895	0.013	0.058	1	ENSMUST00000081688	Srgap1	ENSMUSG00000020121	protein_coding	utr	chr10-121780991-121785397	chr10-121780968-121781636	0
chr11-49612229-49612454	0.0227472	0.136814	0.055	0.038	1	ENSMUST00000152253	Flt4	ENSMUSG00000020357	protein_coding	gap	chr11-49609828-49624644	chr11-49612229-49612454	0
chr11-6675280-6675766	0.022772	-0.294352	0.042	0.121	1	ENSMUST00000139540	Ramp3	ENSMUSG00000041046	protein_coding	gap	chr11-6674896-6676482	chr11-6675280-6675766	0
chr17-30752528-30752843	0.0227895	-0.268816	0.013	0.056	1	ENSMUST00000170651	Dnah8	ENSMUSG00000033826	protein_coding	cds	chr17-30752822-30752944	chr17-30752528-30752843	0
chr10-83079713-83080828	0.0228067	-0.233451	0.032	0.098	1	ENSMUST00000040110	Chst11	ENSMUSG00000034612	protein_coding	gap	chr10-82985983-83092068	chr10-83079713-83080828	0
chr5-150466004-150466695	0.0228081	-0.263391	0.085	0.184	1	ENSMUST00000087204	Fry	ENSMUSG00000056602	protein_coding	cds	chr5-150466244-150466441	chr5-150466004-150466695	0
chr17-26464862-26465457	0.0228305	-0.242193	0.173	0.298	1	ENSMUST00000053020	Neurl1b	ENSMUSG00000034413	protein_coding	utr	chr17-26441796-26446349	chr17-26464862-26465457	18512
chr5-33393644-33394143	0.0228355	-0.179282	0.03	0.086	1	ENSMUST00000185821	Uvssa	ENSMUSG00000037355	protein_coding	gap	chr5-33392185-33402493	chr5-33393644-33394143	0
chr11-20858730-20859695	0.022847	-0.21941	0.128	0.205	1	ENSMUST00000123160	Gm12037	ENSMUSG00000086749	lincRNA	exon	chr11-20831690-20831919	chr11-20858730-20859695	26810
chr8-104116345-104116777	0.0228711	-0.313527	0.028	0.096	1	ENSMUST00000034339	Cdh5	ENSMUSG00000031871	protein_coding	gap	chr8-104113103-104125458	chr8-104116345-104116777	0
chr16-21827056-21827716	0.0228813	0.130661	0.067	0.048	1	ENSMUST00000181834	Gm26744	ENSMUSG00000097401	lincRNA	exon	chr16-21843451-21845028	chr16-21827056-21827716	15734
chr7-131541752-131543500	0.0229059	-0.135827	0.012	0.061	1	ENSMUST00000046093	Hmx3	ENSMUSG00000040148	protein_coding	cds	chr7-131542963-131543362	chr7-131541752-131543500	0
chr8-120971607-120972802	0.0229939	-0.26907	0.102	0.207	1	ENSMUST00000127664	Gm20388	ENSMUSG00000092329	protein_coding	gap	chr8-119910940-124295357	chr8-120971607-120972802	0
chr11-48825882-48827116	0.0230877	-0.18474	0.07	0.157	1	ENSMUST00000104959	Gm12184	ENSMUSG00000078154	protein_coding	cds	chr11-48826005-48826349	chr11-48825882-48827116	0
chr9-75600178-75600776	0.0231238	-0.27629	0.027	0.073	1	ENSMUST00000064433	Tmod2	ENSMUSG00000032186	protein_coding	gap	chr9-75597403-75611023	chr9-75600178-75600776	0
chr5-125226110-125226891	0.0231306	0.144606	0.187	0.162	1	ENSMUST00000111398	Ncor2	ENSMUSG00000029478	protein_coding	exon	chr5-125178997-125179219	chr5-125226110-125226891	46890
chr8-91355424-91355848	0.023199	-0.226583	0.012	0.051	1	ENSMUST00000136802	Fto	ENSMUSG00000055932	protein_coding	gap	chr8-91313621-91401806	chr8-91355424-91355848	0
chrX-96019252-96019948	0.0232413	-0.167984	0.028	0.091	1	ENSMUST00000139717	Las1l	ENSMUSG00000057421	protein_coding	exon	chrX-95956658-95956962	chrX-96019252-96019948	62289
chr5-76079566-76080034	0.0232852	0.184651	0.145	0.121	1	ENSMUST00000031143	Srd5a3	ENSMUSG00000029233	protein_coding	exon	chr5-76140271-76140548	chr5-76079566-76080034	60236
chr5-118725962-118726504	0.0234369	-0.250457	0.018	0.068	1	ENSMUST00000100816	Med13l	ENSMUSG00000018076	protein_coding	cds	chr5-118726261-118726365	chr5-118725962-118726504	0
chr8-8488259-8489262	0.0234504	0.241947	0.163	0.109	1	ENSMUST00000001319	Efnb2	ENSMUSG00000001300	protein_coding	utr	chr8-8617434-8620587	chr8-8488259-8489262	128171
chr5-125384467-125386067	0.0234713	0.129209	0.233	0.189	1	ENSMUST00000156249	Ubc	ENSMUSG00000008348	protein_coding	cds	chr5-125386057-125388261	chr5-125384467-125386067	0
chr6-136499050-136499784	0.0234912	-0.16349	0.028	0.096	1	ENSMUST00000032335	Atf7ip	ENSMUSG00000030213	protein_coding	exon	chr6-136518802-136518963	chr6-136499050-136499784	19017
chr16-50030683-50031486	0.0235165	0.159474	0.075	0.053	1	ENSMUST00000084838	Cd47	ENSMUSG00000055447	protein_coding	utr	chr16-49910878-49915010	chr16-50030683-50031486	115672
chr9-32400395-32401259	0.0235582	-0.228719	0.062	0.136	1	ENSMUST00000172015	Kcnj1	ENSMUSG00000041248	protein_coding	utr	chr9-32397461-32399192	chr9-32400395-32401259	1202
chr3-149294417-149294747	0.0235805	-0.293932	0.015	0.066	1	ENSMUST00000180599	Gm10287	ENSMUSG00000070342	lincRNA	exon	chr3-149221687-149225745	chr3-149294417-149294747	68671
chr12-100508500-100509070	0.0236025	-0.214476	0.03	0.088	1	ENSMUST00000062957	Ttc7b	ENSMUSG00000033530	protein_coding	gap	chr12-100500231-100520570	chr12-100508500-100509070	0
chr10-94572779-94573132	0.0236241	-0.236737	0.03	0.083	1	ENSMUST00000148910	Tmcc3	ENSMUSG00000020023	protein_coding	gap	chr10-94551027-94578422	chr10-94572779-94573132	0
chr18-69693084-69693953	0.023633	0.157596	0.055	0.02	1	ENSMUST00000078486	Tcf4	ENSMUSG00000053477	protein_coding	utr	chr18-69683077-69687967	chr18-69693084-69693953	5116
chr10-8817965-8818402	0.023641	0.184334	0.068	0.035	1	ENSMUST00000015449	Sash1	ENSMUSG00000015305	protein_coding	gap	chr10-8814458-8850362	chr10-8817965-8818402	0
chr2-167307135-167307510	0.0236682	0.141444	0.075	0.066	1	ENSMUST00000109221	B4galt5	ENSMUSG00000017929	protein_coding	gap	chr2-167306708-167307543	chr2-167307135-167307510	0
chr15-78771475-78773740	0.0237075	-0.169875	0.208	0.361	1	ENSMUST00000018313	Mfng	ENSMUSG00000018169	protein_coding	cds	chr15-78773018-78773272	chr15-78771475-78773740	0
chr5-35803295-35804196	0.0237231	0.214016	0.187	0.146	1	ENSMUST00000129347	Ablim2	ENSMUSG00000029095	protein_coding	gap	chr5-35802544-35807038	chr5-35803295-35804196	0
chr14-21982431-21982905	0.0237239	0.116651	0.055	0.035	1	ENSMUST00000043409	Zfp503	ENSMUSG00000039081	protein_coding	utr	chr14-21983962-21984887	chr14-21982431-21982905	1056
chr17-28951530-28952983	0.023786	-0.165173	0.212	0.381	1	ENSMUST00000153831	Kctd20	ENSMUSG00000005936	protein_coding	utr	chr17-28952688-28952757	chr17-28951530-28952983	0
chr17-13699338-13700668	0.023808	-0.280235	0.158	0.258	1	ENSMUST00000135850	Tcte2	ENSMUSG00000038347	protein_coding	gap	chr17-13554093-13761285	chr17-13699338-13700668	0
chr16-8671366-8672449	0.0238179	-0.157999	0.287	0.424	1	ENSMUST00000008537	Carhsp1	ENSMUSG00000008393	protein_coding	utr	chr16-8672113-8672153	chr16-8671366-8672449	0
chr19-56665907-56666209	0.0238576	-0.275122	0.02	0.068	1	ENSMUST00000038949	Adrb1	ENSMUSG00000035283	protein_coding	exon	chr19-56722372-56724862	chr19-56665907-56666209	56162
chr7-109561559-109562662	0.0238577	-0.18974	0.033	0.086	1	ENSMUST00000168005	St5	ENSMUSG00000031024	protein_coding	gap	chr7-109553112-109570006	chr7-109561559-109562662	0
chr1-182499483-182499779	0.0238865	-0.288451	0.042	0.109	1	ENSMUST00000192483	Capn2	ENSMUSG00000026509	protein_coding	gap	chr1-182492871-182508791	chr1-182499483-182499779	0
chr16-87660823-87661987	0.0238968	-0.236141	0.203	0.348	1	ENSMUST00000026703	Bach1	ENSMUSG00000025612	protein_coding	exon	chr16-87698945-87699056	chr16-87660823-87661987	36957
chr3-28262328-28264560	0.0239012	-0.181282	0.112	0.24	1	ENSMUST00000162777	Tnik	ENSMUSG00000027692	protein_coding	cds	chr3-28263643-28263699	chr3-28262328-28264560	0
chr3-84695388-84696851	0.0239155	-0.16151	0.028	0.083	1	ENSMUST00000154148	RP24-559D1.1	ENSMUSG00000102805	protein_coding	gap	chr3-84540623-85785217	chr3-84695388-84696851	0
chr5-64360069-64360944	0.0239242	-0.232724	0.105	0.212	1	ENSMUST00000101195	Tbc1d1	ENSMUSG00000029174	protein_coding	utr	chr5-64349931-64351486	chr5-64360069-64360944	8582
chrX-157597571-157598985	0.0239282	-0.188295	0.085	0.187	1	ENSMUST00000112522	Mbtps2	ENSMUSG00000046873	protein_coding	cds	chrX-157598496-157598570	chrX-157597571-157598985	0
chr13-94327854-94328426	0.0239378	0.176671	0.098	0.068	1	ENSMUST00000059598	Gm9776	ENSMUSG00000042857	protein_coding	utr	chr13-94355839-94358453	chr13-94327854-94328426	27412
chr3-149435990-149437226	0.0239557	-0.196914	0.023	0.093	1	ENSMUST00000180599	Gm10287	ENSMUSG00000070342	lincRNA	exon	chr3-149221687-149225745	chr3-149435990-149437226	210244
chr2-19702994-19703394	0.0240005	0.140797	0.058	0.035	1	ENSMUST00000135767	Gm13346	ENSMUSG00000087246	lincRNA	exon	chr2-19685727-19686157	chr2-19702994-19703394	16836
chr8-8367208-8367803	0.0240048	-0.203577	0.017	0.061	1	ENSMUST00000001319	Efnb2	ENSMUSG00000001300	protein_coding	utr	chr8-8617434-8620587	chr8-8367208-8367803	249630
chr17-44162290-44162923	0.0241661	-0.305425	0.052	0.129	1	ENSMUST00000024755	Clic5	ENSMUSG00000023959	protein_coding	exon	chr17-44188572-44188961	chr17-44162290-44162923	25648
chr12-27182417-27183258	0.024198	-0.219177	0.018	0.056	1	ENSMUST00000182592	Gm9866	ENSMUSG00000094002	lincRNA	exon	chr12-27160230-27160633	chr12-27182417-27183258	21783
chr11-17000667-17001262	0.0242185	-0.117903	0.012	0.053	1	ENSMUST00000156101	Plek	ENSMUSG00000020120	protein_coding	gap	chr11-16995356-17002813	chr11-17000667-17001262	0
chr17-31912262-31912688	0.0242867	-0.189987	0.025	0.066	1	ENSMUST00000002145	Hsf2bp	ENSMUSG00000002076	protein_coding	utr	chr17-31944769-31946602	chr17-31912262-31912688	32080
chr4-40721844-40723414	0.0243093	-0.134563	0.36	0.49	1	ENSMUST00000164233	Dnaja1	ENSMUSG00000028410	protein_coding	utr	chr4-40722922-40723136	chr4-40721844-40723414	0
chr14-69088530-69089700	0.0243174	-0.269214	0.11	0.245	1	ENSMUST00000014957	Stc1	ENSMUSG00000014813	protein_coding	utr	chr14-69038504-69041401	chr14-69088530-69089700	47128
chr6-65593978-65594519	0.0243701	-0.132613	0.017	0.081	1	ENSMUST00000114236	Tnip3	ENSMUSG00000044162	protein_coding	gap	chr6-65593547-65596131	chr6-65593978-65594519	0
chr3-115708960-115709454	0.0243759	-0.327618	0.17	0.306	1	ENSMUST00000055676	S1pr1	ENSMUSG00000045092	protein_coding	utr	chr3-115710433-115711794	chr3-115708960-115709454	978
chr17-80391411-80392337	0.024382	-0.140876	0.032	0.104	1	ENSMUST00000068714	Sos1	ENSMUSG00000024241	protein_coding	utr	chr17-80393752-80398180	chr17-80391411-80392337	1414
chr12-75412718-75414019	0.0243847	-0.234655	0.05	0.131	1	ENSMUST00000051079	Gphb5	ENSMUSG00000048982	protein_coding	cds	chr12-75412827-75413015	chr12-75412718-75414019	0
chr13-109209432-109209934	0.0244301	-0.195303	0.028	0.076	1	ENSMUST00000177907	Pde4d	ENSMUSG00000021699	protein_coding	gap	chr13-109032698-109740386	chr13-109209432-109209934	0
chr5-148907615-148908569	0.0244406	-0.120879	0.008	0.056	1	ENSMUST00000149169	Katnal1	ENSMUSG00000041298	protein_coding	gap	chr5-148904730-148918595	chr5-148907615-148908569	0
chr2-128125335-128126657	0.0245024	-0.150707	0.263	0.427	1	ENSMUST00000110341	Bcl2l11	ENSMUSG00000027381	protein_coding	utr	chr2-128126039-128126252	chr2-128125335-128126657	0
chr2-37421988-37423366	0.0245028	-0.168457	0.16	0.29	1	ENSMUST00000112936	Rc3h2	ENSMUSG00000075376	protein_coding	utr	chr2-37422767-37422869	chr2-37421988-37423366	0
chr6-31592550-31593177	0.0245081	-0.325868	0.055	0.121	1	ENSMUST00000124919	Gm13847	ENSMUSG00000086804	lincRNA	exon	chr6-31605211-31605452	chr6-31592550-31593177	12033
chr12-108370365-108371521	0.0245372	-0.255442	0.11	0.21	1	ENSMUST00000138456	Eml1	ENSMUSG00000058070	protein_coding	gap	chr12-108371353-108463526	chr12-108370365-108371521	0
chr11-106502632-106503732	0.0245449	0.169465	0.088	0.048	1	ENSMUST00000042780	Tex2	ENSMUSG00000040548	protein_coding	cds	chr11-106503596-106503718	chr11-106502632-106503732	0
chr11-52273091-52273692	0.0245612	-0.221239	0.043	0.131	1	ENSMUST00000109071	Tcf7	ENSMUSG00000000782	protein_coding	gap	chr11-52261625-52282121	chr11-52273091-52273692	0
chr11-95789240-95790314	0.0245865	-0.199968	0.042	0.109	1	ENSMUST00000133070	Zfp652	ENSMUSG00000075595	protein_coding	gap	chr11-95754056-95828665	chr11-95789240-95790314	0
chr1-152598995-152599853	0.0246025	-0.196585	0.063	0.136	1	ENSMUST00000149536	Rgl1	ENSMUSG00000026482	protein_coding	gap	chr1-152586616-152611986	chr1-152598995-152599853	0
chr7-98579843-98580805	0.0246085	-0.259599	0.053	0.139	1	ENSMUST00000038359	2210018M11Rik	ENSMUSG00000035401	protein_coding	utr	chr7-98590615-98590689	chr7-98579843-98580805	9809
chr11-60175160-60177029	0.0246364	-0.180749	0.068	0.182	1	ENSMUST00000102688	Rai1	ENSMUSG00000062115	protein_coding	utr	chr11-60175879-60175961	chr11-60175160-60177029	0
chr11-93954866-93956535	0.0246648	-0.174852	0.207	0.364	1	ENSMUST00000170303	Gm20390	ENSMUSG00000091228	protein_coding	cds	chr11-93955495-93955624	chr11-93954866-93956535	0
chr8-8826826-8828017	0.0246973	-0.291242	0.07	0.164	1	ENSMUST00000048545	Arglu1	ENSMUSG00000040459	protein_coding	exon	chr8-8689977-8690537	chr8-8826826-8828017	136288
chr3-38887382-38888411	0.0247088	-0.228736	0.055	0.119	1	ENSMUST00000061260	Fat4	ENSMUSG00000046743	protein_coding	cds	chr3-38886960-38892134	chr3-38887382-38888411	0
chr9-32899771-32900365	0.02473	-0.243648	0.068	0.144	1	ENSMUST00000185169	Gm27162	ENSMUSG00000099025	lincRNA	exon	chr9-32904937-32907042	chr9-32899771-32900365	4571
chr9-102912556-102913054	0.0247486	-0.340448	0.028	0.096	1	ENSMUST00000176198	Ryk	ENSMUSG00000032547	protein_coding	utr	chr9-102906850-102908305	chr9-102912556-102913054	4250
chr4-95160858-95161773	0.0247652	-0.17788	0.227	0.374	1	ENSMUST00000136941	Gm12708	ENSMUSG00000084918	lincRNA	exon	chr4-95193313-95193404	chr4-95160858-95161773	31539
chr4-57866036-57866386	0.024815	-0.189356	0.015	0.066	1	ENSMUST00000150412	Palm2Akap2	ENSMUSG00000089945	protein_coding	gap	chr4-57857038-57883023	chr4-57866036-57866386	0
chr16-91862862-91863203	0.0248458	0.160731	0.07	0.043	1	ENSMUST00000159295	Atp5o	ENSMUSG00000022956	protein_coding	gap	chr16-91686371-91926458	chr16-91862862-91863203	0
chr11-73235991-73236644	0.0248737	0.188424	0.073	0.043	1	ENSMUST00000102526	Trpv1	ENSMUSG00000005952	protein_coding	gap	chr11-73234368-73238225	chr11-73235991-73236644	0
chr8-117287622-117288518	0.024877	-0.195538	0.052	0.159	1	ENSMUST00000166750	Cmip	ENSMUSG00000034390	protein_coding	gap	chr8-117257402-117377074	chr8-117287622-117288518	0
chr6-134243209-134243915	0.0248804	-0.25815	0.063	0.139	1	ENSMUST00000169529	Etv6	ENSMUSG00000030199	protein_coding	gap	chr6-134233654-134248273	chr6-134243209-134243915	0
chr1-86858778-86859183	0.024909	-0.303936	0.027	0.083	1	ENSMUST00000190618	Dis3l2	ENSMUSG00000053333	protein_coding	gap	chr1-86857375-86878402	chr1-86858778-86859183	0
chr13-34794415-34794912	0.0249414	-0.187012	0.028	0.073	1	ENSMUST00000039605	Fam50b	ENSMUSG00000038246	protein_coding	utr	chr13-34747548-34747613	chr13-34794415-34794912	46801
chr17-43406191-43406623	0.025017	-0.255383	0.023	0.068	1	ENSMUST00000113599	Gpr116	ENSMUSG00000056492	protein_coding	gap	chr17-43404044-43410501	chr17-43406191-43406623	0
chr8-8959015-8960090	0.0250446	-0.213532	0.025	0.063	1	ENSMUST00000110969	Fam155a	ENSMUSG00000079157	protein_coding	utr	chr8-9206001-9207742	chr8-8959015-8960090	245910
chr13-3768640-3769097	0.0251229	-0.179059	0.017	0.053	1	ENSMUST00000077698	Calml3	ENSMUSG00000063130	protein_coding	utr	chr13-3802893-3803753	chr13-3768640-3769097	33795
chr17-86156977-86157274	0.025133	-0.305715	0.025	0.083	1	ENSMUST00000097275	Prkce	ENSMUSG00000045038	protein_coding	exon	chr17-86167785-86168940	chr17-86156977-86157274	10510
chr18-62127134-62127506	0.0251428	-0.288556	0.012	0.061	1	ENSMUST00000053640	Adrb2	ENSMUSG00000045730	protein_coding	utr	chr18-62177817-62178495	chr18-62127134-62127506	50310
chr16-18723255-18723676	0.0251747	-0.300071	0.037	0.096	1	ENSMUST00000043577	Cldn5	ENSMUSG00000041378	protein_coding	exon	chr16-18776847-18778260	chr16-18723255-18723676	53170
chr17-43400449-43400724	0.0251766	-0.305837	0.025	0.078	1	ENSMUST00000113599	Gpr116	ENSMUSG00000056492	protein_coding	gap	chr17-43389708-43403917	chr17-43400449-43400724	0
chr10-53394999-53395604	0.0252034	-0.208954	0.018	0.066	1	ENSMUST00000095691	Cep85l	ENSMUSG00000038594	protein_coding	exon	chr10-53379509-53379851	chr10-53394999-53395604	15147
chr8-46764704-46765559	0.0252127	-0.221077	0.052	0.141	1	ENSMUST00000034041	Irf2	ENSMUSG00000031627	protein_coding	gap	chr8-46739937-46793492	chr8-46764704-46765559	0
chr7-125478393-125478961	0.0252475	-0.16808	0.013	0.066	1	ENSMUST00000149289	Nsmce1	ENSMUSG00000030750	protein_coding	gap	chr7-125472230-125478454	chr7-125478393-125478961	0
chr5-146808651-146808852	0.0252483	-0.285769	0.017	0.066	1	ENSMUST00000085614	Usp12	ENSMUSG00000029640	protein_coding	exon	chr5-146794615-146795006	chr5-146808651-146808852	13644
chr16-92157797-92159250	0.0252636	0.10347	0.063	0.045	1	ENSMUST00000047429	Mrps6	ENSMUSG00000039680	protein_coding	utr	chr16-92111926-92112227	chr16-92157797-92159250	45569
chr2-167777101-167778295	0.0253736	-0.135509	0.322	0.472	1	ENSMUST00000139927	Gm14321	ENSMUSG00000084797	lincRNA	gap	chr2-167777667-167780722	chr2-167777101-167778295	0
chr11-87427817-87428521	0.0254269	0.146329	0.128	0.088	1	ENSMUST00000156483	Tex14	ENSMUSG00000010342	protein_coding	gap	chr11-87427716-87433808	chr11-87427817-87428521	0
chr4-32337576-32337887	0.0254346	-0.260805	0.05	0.111	1	ENSMUST00000149201	Bach2	ENSMUSG00000040270	protein_coding	gap	chr4-32317305-32417434	chr4-32337576-32337887	0
chr12-27165778-27166187	0.0254437	-0.282903	0.01	0.053	1	ENSMUST00000182592	Gm9866	ENSMUSG00000094002	lincRNA	exon	chr12-27160230-27160633	chr12-27165778-27166187	5144
chr11-17192099-17192731	0.025456	-0.111979	0.007	0.058	1	ENSMUST00000151431	Wdr92	ENSMUSG00000078970	protein_coding	gap	chr11-17182147-17192956	chr11-17192099-17192731	0
chr3-86793692-86794168	0.0255481	-0.354463	0.065	0.169	1	ENSMUST00000195561	Dclk2	ENSMUSG00000028078	protein_coding	cds	chr3-86793817-86793913	chr3-86793692-86794168	0
chr14-63899277-63899903	0.0255966	-0.299848	0.105	0.215	1	ENSMUST00000022528	Pinx1	ENSMUSG00000021958	protein_coding	gap	chr14-63878189-63919096	chr14-63899277-63899903	0
chr1-54713237-54713593	0.0256226	-0.189207	0.012	0.051	1	ENSMUST00000179242	Ankrd44	ENSMUSG00000052331	protein_coding	gap	chr1-54681192-54723013	chr1-54713237-54713593	0
chr11-78530901-78531254	0.0256738	-0.32793	0.052	0.129	1	ENSMUST00000108277	Tnfaip1	ENSMUSG00000017615	protein_coding	gap	chr11-78530348-78536085	chr11-78530901-78531254	0
chr3-146812168-146813490	0.0256787	-0.162638	0.193	0.333	1	ENSMUST00000102515	Prkacb	ENSMUSG00000005034	protein_coding	cds	chr3-146812638-146812683	chr3-146812168-146813490	0
chr5-119055378-119055712	0.0257226	-0.330352	0.037	0.101	1	ENSMUST00000190550	1700081H04Rik	ENSMUSG00000100573	lincRNA	exon	chr5-119108234-119108715	chr5-119055378-119055712	52521
chr17-86302792-86303152	0.0257411	-0.325364	0.063	0.144	1	ENSMUST00000097275	Prkce	ENSMUSG00000045038	protein_coding	gap	chr17-86168941-86353554	chr17-86302792-86303152	0
chr11-4507473-4507776	0.0257523	-0.194326	0.025	0.061	1	ENSMUST00000130716	Mtmr3	ENSMUSG00000034354	protein_coding	cds	chr11-4507590-4507686	chr11-4507473-4507776	0
chr5-125073983-125075138	0.0258891	0.135744	0.282	0.258	1	ENSMUST00000111402	Ncor2	ENSMUSG00000029478	protein_coding	gap	chr5-125069078-125079007	chr5-125073983-125075138	0
chr10-14035631-14035934	0.0259033	-0.241507	0.038	0.091	1	ENSMUST00000191464	Hivep2	ENSMUSG00000015501	protein_coding	gap	chr10-14004276-14066582	chr10-14035631-14035934	0
chr11-72795174-72796843	0.0259689	-0.162922	0.19	0.338	1	ENSMUST00000172220	Zzef1	ENSMUSG00000055670	protein_coding	cds	chr11-72796297-72796650	chr11-72795174-72796843	0
chr12-26410460-26410775	0.0259854	-0.155542	0.013	0.066	1	ENSMUST00000062149	Rnf144a	ENSMUSG00000020642	protein_coding	gap	chr12-26389576-26415100	chr12-26410460-26410775	0
chr19-42034595-42035801	0.0260253	-0.214242	0.075	0.174	1	ENSMUST00000026170	Ubtd1	ENSMUSG00000025171	protein_coding	utr	chr19-42033975-42034641	chr19-42034595-42035801	0
chr17-34348858-34349745	0.0260389	-0.135028	0.032	0.091	1	ENSMUST00000025198	Btnl2	ENSMUSG00000024340	protein_coding	exon	chr17-34354822-34355070	chr17-34348858-34349745	5076
chr4-155186974-155187653	0.0260434	-0.220647	0.072	0.169	1	ENSMUST00000129314	Ski	ENSMUSG00000029050	protein_coding	gap	chr4-155160957-155188256	chr4-155186974-155187653	0
chr16-18732663-18733919	0.0260456	-0.22826	0.267	0.414	1	ENSMUST00000043577	Cldn5	ENSMUSG00000041378	protein_coding	exon	chr16-18776847-18778260	chr16-18732663-18733919	42927
chr13-112993472-112994547	0.0260553	-0.148597	0.03	0.104	1	ENSMUST00000092089	Mcidas	ENSMUSG00000074651	protein_coding	cds	chr13-112994357-112994448	chr13-112993472-112994547	0
chr15-101339390-101339894	0.0260955	-0.149032	0.018	0.066	1	ENSMUST00000077196	Krt80	ENSMUSG00000037185	protein_coding	utr	chr15-101349571-101349914	chr15-101339390-101339894	9676
chr16-57230848-57231916	0.0261157	-0.150808	0.267	0.429	1	ENSMUST00000023431	Tbc1d23	ENSMUSG00000022749	protein_coding	cds	chr16-57231314-57231366	chr16-57230848-57231916	0
chr1-161041642-161042200	0.0261251	0.116201	0.062	0.035	1	ENSMUST00000035430	Dars2	ENSMUSG00000026709	protein_coding	cds	chr1-161041716-161041930	chr1-161041642-161042200	0
chr10-94480303-94481060	0.026164	-0.302034	0.078	0.172	1	ENSMUST00000132743	Tmcc3	ENSMUSG00000020023	protein_coding	gap	chr10-94430640-94578422	chr10-94480303-94481060	0
chr2-32645999-32647593	0.0261732	-0.260622	0.11	0.217	1	ENSMUST00000167841	Eng	ENSMUSG00000026814	protein_coding	cds	chr2-32646958-32647024	chr2-32645999-32647593	0
chr10-13303658-13305116	0.026183	-0.141488	0.047	0.124	1	ENSMUST00000105547	Phactr2	ENSMUSG00000062866	protein_coding	gap	chr10-13291963-13474055	chr10-13303658-13305116	0
chr6-113283080-113284275	0.0262431	-0.12097	0.012	0.051	1	ENSMUST00000041203	Cpne9	ENSMUSG00000030270	protein_coding	cds	chr6-113284205-113284207	chr6-113283080-113284275	0
chr9-110652051-110652787	0.0262445	-0.177842	0.057	0.126	1	ENSMUST00000167320	Nbeal2	ENSMUSG00000056724	protein_coding	gap	chr9-110644719-110653896	chr9-110652051-110652787	0
chr11-77497161-77497908	0.0262677	-0.222949	0.255	0.389	1	ENSMUST00000100812	Git1	ENSMUSG00000011877	protein_coding	gap	chr11-77493635-77498964	chr11-77497161-77497908	0
chr1-165609289-165610000	0.026272	-0.187537	0.01	0.056	1	ENSMUST00000191818	Mpzl1	ENSMUSG00000026566	protein_coding	cds	chr1-165609476-165609488	chr1-165609289-165610000	0
chr4-40846481-40846910	0.0262823	-0.166324	0.028	0.093	1	ENSMUST00000108096	B4galt1	ENSMUSG00000028413	protein_coding	gap	chr4-40823675-40853390	chr4-40846481-40846910	0
chr8-121272441-121272780	0.0262824	0.196281	0.127	0.096	1	ENSMUST00000181200	Gm26815	ENSMUSG00000097384	lincRNA	gap	chr8-121259311-121356034	chr8-121272441-121272780	0
chr1-4493106-4493778	0.0262972	-0.34736	0.068	0.157	1	ENSMUST00000192913	Sox17	ENSMUSG00000025902	protein_coding	cds	chr1-4493100-4493406	chr1-4493106-4493778	0
chr4-155367138-155368020	0.0263178	0.2007	0.123	0.086	1	ENSMUST00000030922	Prkcz	ENSMUSG00000029053	protein_coding	exon	chr4-155361152-155361361	chr4-155367138-155368020	5776
chr2-52377873-52379201	0.0263216	-0.224927	0.062	0.144	1	ENSMUST00000036541	Arl5a	ENSMUSG00000036093	protein_coding	utr	chr2-52397951-52402383	chr2-52377873-52379201	18749
chr8-70653066-70653583	0.0263739	-0.201153	0.055	0.131	1	ENSMUST00000070173	Pgpep1	ENSMUSG00000056204	protein_coding	gap	chr8-70652522-70657427	chr8-70653066-70653583	0
chr16-21640863-21641253	0.0263779	-0.191441	0.025	0.071	1	ENSMUST00000125487	Vps8	ENSMUSG00000033653	protein_coding	cds	chr16-21641015-21641116	chr16-21640863-21641253	0
chr9-14379955-14381946	0.0263872	-0.174309	0.133	0.255	1	ENSMUST00000167549	Endod1	ENSMUSG00000037419	protein_coding	cds	chr9-14380671-14380970	chr9-14379955-14381946	0
chr1-132833934-132834424	0.0264083	0.170972	0.082	0.061	1	ENSMUST00000027706	Lrrn2	ENSMUSG00000026443	protein_coding	exon	chr1-132880273-132880675	chr1-132833934-132834424	45848
chr7-131409595-131410954	0.0264127	-0.163502	0.185	0.351	1	ENSMUST00000117518	Acadsb	ENSMUSG00000030861	protein_coding	cds	chr7-131410746-131410787	chr7-131409595-131410954	0
chr15-61007365-61007917	0.026423	-0.333	0.058	0.126	1	ENSMUST00000096418	A1bg	ENSMUSG00000022347	protein_coding	exon	chr15-60921223-60921270	chr15-61007365-61007917	86094
chr11-68346168-68346368	0.0264806	-0.289973	0.018	0.063	1	ENSMUST00000108674	Ntn1	ENSMUSG00000020902	protein_coding	gap	chr11-68277612-68385102	chr11-68346168-68346368	0
chr8-120144749-120145399	0.0264995	-0.328349	0.045	0.116	1	ENSMUST00000153725	6430548M08Rik	ENSMUSG00000031824	protein_coding	cds	chr8-120145335-120145663	chr8-120144749-120145399	0
chr5-73255298-73257449	0.0265437	-0.124158	0.393	0.548	1	ENSMUST00000101127	Fryl	ENSMUSG00000070733	protein_coding	utr	chr5-73256400-73256618	chr5-73255298-73257449	0
chr7-16299450-16300078	0.0265484	-0.176749	0.133	0.253	1	ENSMUST00000002152	Bbc3	ENSMUSG00000002083	protein_coding	exon	chr7-16309616-16309861	chr7-16299450-16300078	9537
chr16-18088455-18090394	0.0265687	-0.204039	0.108	0.217	1	ENSMUST00000139861	Prodh	ENSMUSG00000003526	protein_coding	cds	chr16-18088888-18089157	chr16-18088455-18090394	0
chr11-75051414-75052134	0.0266565	-0.236365	0.053	0.126	1	ENSMUST00000140197	Smg6	ENSMUSG00000038290	protein_coding	gap	chr11-75042037-75053761	chr11-75051414-75052134	0
chr16-95349311-95350794	0.026679	-0.144025	0.018	0.061	1	ENSMUST00000113846	Erg	ENSMUSG00000040732	protein_coding	utr	chr16-95359169-95360805	chr16-95349311-95350794	8374
chr18-5816017-5816503	0.0266864	0.118316	0.053	0.033	1	ENSMUST00000025081	Zeb1	ENSMUSG00000024238	protein_coding	utr	chr18-5773067-5775467	chr18-5816017-5816503	40549
chr16-95438859-95439492	0.0267049	-0.318341	0.137	0.25	1	ENSMUST00000177450	Erg	ENSMUSG00000040732	protein_coding	gap	chr16-95390046-95524526	chr16-95438859-95439492	0
chr9-37551784-37553204	0.0267294	-0.175337	0.092	0.172	1	ENSMUST00000065668	Nrgn	ENSMUSG00000053310	protein_coding	cds	chr9-37552537-37552551	chr9-37551784-37553204	0
chr19-34665974-34666508	0.0267582	0.11421	0.065	0.043	1	ENSMUST00000009522	Slc16a12	ENSMUSG00000009378	protein_coding	utr	chr19-34668403-34670630	chr19-34665974-34666508	1894
chr11-48927694-48928383	0.0267619	-0.176963	0.015	0.061	1	ENSMUST00000059930	Gm12185	ENSMUSG00000048852	protein_coding	gap	chr11-48916385-48992003	chr11-48927694-48928383	0
chr2-25167585-25168670	0.0268267	-0.245885	0.077	0.177	1	ENSMUST00000104999	Nrarp	ENSMUSG00000078202	protein_coding	exon	chr2-25180758-25183339	chr2-25167585-25168670	12087
chr12-79028685-79030052	0.0268667	-0.20183	0.075	0.182	1	ENSMUST00000039928	Plekhh1	ENSMUSG00000060716	protein_coding	utr	chr12-79029163-79029420	chr12-79028685-79030052	0
chr7-118975845-118976960	0.0268962	0.1199	0.072	0.063	1	ENSMUST00000008878	Gprc5b	ENSMUSG00000008734	protein_coding	cds	chr7-118976513-118976670	chr7-118975845-118976960	0
chr6-141090657-141092067	0.0269407	-0.196043	0.033	0.091	1	ENSMUST00000043259	Pde3a	ENSMUSG00000041741	protein_coding	exon	chr6-141249269-141250543	chr6-141090657-141092067	157201
chr10-43577540-43578013	0.0269657	-0.131575	0.007	0.056	1	ENSMUST00000058714	Cd24a	ENSMUSG00000047139	protein_coding	exon	chr10-43579169-43579322	chr10-43577540-43578013	1155
chr4-55670284-55670519	0.0270383	-0.262344	0.027	0.066	1	ENSMUST00000123620	Gm12506	ENSMUSG00000085375	lincRNA	exon	chr4-55636844-55636901	chr4-55670284-55670519	33382
chr5-35056337-35057262	0.0270571	-0.199006	0.032	0.083	1	ENSMUST00000133381	Dok7	ENSMUSG00000044716	protein_coding	cds	chr5-35057092-35057137	chr5-35056337-35057262	0
chr3-90525278-90525816	0.0271018	0.116367	0.077	0.063	1	ENSMUST00000048138	S100a13	ENSMUSG00000042312	protein_coding	utr	chr3-90524497-90524581	chr3-90525278-90525816	696
chr14-60789820-60790476	0.0271415	-0.160462	0.025	0.076	1	ENSMUST00000063562	Mipep	ENSMUSG00000021993	protein_coding	gap	chr14-60788243-60790886	chr14-60789820-60790476	0
chr3-87616124-87617916	0.0271513	-0.177133	0.182	0.311	1	ENSMUST00000129113	Arhgef11	ENSMUSG00000041977	protein_coding	utr	chr3-87617585-87618760	chr3-87616124-87617916	0
chr15-76306743-76307773	0.0271612	-0.186283	0.113	0.205	1	ENSMUST00000171340	Oplah	ENSMUSG00000022562	protein_coding	utr	chr15-76306975-76307101	chr15-76306743-76307773	0
chr7-125551113-125551440	0.0272549	-0.188562	0.043	0.098	1	ENSMUST00000033004	Il4ra	ENSMUSG00000030748	protein_coding	exon	chr7-125552282-125552328	chr7-125551113-125551440	841
chr3-138815083-138815815	0.0272575	0.117551	0.072	0.053	1	ENSMUST00000153336	Tspan5	ENSMUSG00000028152	protein_coding	gap	chr3-138742856-138868345	chr3-138815083-138815815	0
chr8-69022358-69024039	0.027306	-0.147479	0.028	0.086	1	ENSMUST00000037478	Slc18a1	ENSMUSG00000036330	protein_coding	utr	chr8-69037711-69038794	chr8-69022358-69024039	13671
chr1-195040214-195040742	0.0273762	-0.148179	0.018	0.066	1	ENSMUST00000162650	Cd46	ENSMUSG00000016493	protein_coding	utr	chr1-195041238-195041991	chr1-195040214-195040742	495
chr5-129260752-129260982	0.0273851	-0.253674	0.018	0.058	1	ENSMUST00000056617	Gpr133	ENSMUSG00000044017	protein_coding	utr	chr5-129202560-129204599	chr5-129260752-129260982	56152
chr8-124212274-124212818	0.0274625	-0.205782	0.018	0.053	1	ENSMUST00000127664	Gm20388	ENSMUSG00000092329	protein_coding	gap	chr8-119910940-124295357	chr8-124212274-124212818	0
chr8-70211639-70213258	0.0274762	-0.101988	0.495	0.611	1	ENSMUST00000110127	Slc25a42	ENSMUSG00000002346	protein_coding	utr	chr8-70212228-70212305	chr8-70211639-70213258	0
chr11-101679698-101680163	0.0275007	-0.291727	0.032	0.091	1	ENSMUST00000039388	Arl4d	ENSMUSG00000034936	protein_coding	utr	chr11-101667256-101667832	chr11-101679698-101680163	11865
chr19-8941210-8942743	0.0275119	-0.159969	0.205	0.328	1	ENSMUST00000096241	Eml3	ENSMUSG00000071647	protein_coding	cds	chr19-8941130-8941333	chr19-8941210-8942743	0
chr3-122121735-122123216	0.027708	-0.170938	0.365	0.503	1	ENSMUST00000013995	Abca4	ENSMUSG00000028125	protein_coding	cds	chr3-122121631-122121805	chr3-122121735-122123216	0
chr12-100281183-100281786	0.0277579	0.138516	0.07	0.058	1	ENSMUST00000062957	Ttc7b	ENSMUSG00000033530	protein_coding	utr	chr12-100300771-100301548	chr12-100281183-100281786	18984
chr2-164006849-164007239	0.0277803	-0.127074	0.015	0.058	1	ENSMUST00000131288	Ywhab	ENSMUSG00000018326	protein_coding	gap	chr2-163995872-164011601	chr2-164006849-164007239	0
chr17-25984637-25986279	0.0278544	-0.176282	0.2	0.346	1	ENSMUST00000041641	Capn15	ENSMUSG00000037326	protein_coding	utr	chr17-25985471-25985680	chr17-25984637-25986279	0
chr18-39317998-39319991	0.0278626	-0.132697	0.02	0.063	1	ENSMUST00000155576	Arhgap26	ENSMUSG00000036452	protein_coding	gap	chr18-39306853-39357552	chr18-39317998-39319991	0
chr3-10330258-10331531	0.0278728	-0.173006	0.065	0.167	1	ENSMUST00000128912	Impa1	ENSMUSG00000027531	protein_coding	cds	chr3-10331080-10331118	chr3-10330258-10331531	0
chr11-6545981-6547570	0.0278738	-0.133827	0.405	0.53	1	ENSMUST00000159007	Ccm2	ENSMUSG00000000378	protein_coding	cds	chr11-6547000-6547029	chr11-6545981-6547570	0
chr10-99839955-99840867	0.0279032	-0.305397	0.038	0.104	1	ENSMUST00000056085	Csl	ENSMUSG00000046934	protein_coding	exon	chr10-99757705-99759658	chr10-99839955-99840867	80296
chr5-9072916-9073674	0.0279076	-0.155429	0.027	0.083	1	ENSMUST00000115365	Tmem243	ENSMUSG00000079659	protein_coding	exon	chr5-9100737-9100859	chr5-9072916-9073674	27062
chr18-62759054-62759531	0.0279136	-0.29113	0.022	0.076	1	ENSMUST00000048109	2700046A07Rik	ENSMUSG00000041789	lincRNA	exon	chr18-62755924-62756347	chr18-62759054-62759531	2706
chr6-72426798-72427055	0.0279138	-0.163736	0.022	0.058	1	ENSMUST00000065906	Ggcx	ENSMUSG00000053460	protein_coding	cds	chr6-72427042-72427173	chr6-72426798-72427055	0
chr15-6873177-6874930	0.0279187	-0.270318	0.112	0.232	1	ENSMUST00000176826	Osmr	ENSMUSG00000022146	protein_coding	utr	chr15-6874201-6874969	chr15-6873177-6874930	0
chr4-154336582-154337039	0.0279213	-0.331746	0.12	0.222	1	ENSMUST00000181143	B230104I21Rik	ENSMUSG00000097871	protein_coding	gap	chr4-154336421-154341203	chr4-154336582-154337039	0
chr9-62435460-62436446	0.0279282	-0.236549	0.205	0.346	1	ENSMUST00000174439	Coro2b	ENSMUSG00000041729	protein_coding	gap	chr9-62432507-62449079	chr9-62435460-62436446	0
chr16-92397797-92398267	0.0279282	-0.15817	0.015	0.051	1	ENSMUST00000060005	Rcan1	ENSMUSG00000022951	protein_coding	gap	chr16-92397437-92465832	chr16-92397797-92398267	0
chr16-91645982-91648471	0.0279754	-0.134451	0.372	0.528	1	ENSMUST00000140312	Son	ENSMUSG00000022961	protein_coding	cds	chr16-91647908-91647984	chr16-91645982-91648471	0
chr8-11394759-11395039	0.0280178	-0.31799	0.033	0.111	1	ENSMUST00000033899	Col4a2	ENSMUSG00000031503	protein_coding	gap	chr8-11354358-11398661	chr8-11394759-11395039	0
chr12-112329171-112329468	0.0280543	-0.261129	0.025	0.071	1	ENSMUST00000050754	A730018C14Rik	ENSMUSG00000047828	protein_coding	utr	chr12-112413915-112414975	chr12-112329171-112329468	84446
chr9-106250174-106250622	0.0280563	-0.274114	0.087	0.174	1	ENSMUST00000141118	Alas1	ENSMUSG00000032786	protein_coding	exon	chr9-106247785-106248126	chr9-106250174-106250622	2047
chr2-165396904-165397911	0.0280778	0.101913	0.05	0.033	1	ENSMUST00000029213	Ocstamp	ENSMUSG00000027670	protein_coding	cds	chr2-165397221-165398220	chr2-165396904-165397911	0
chr16-30768848-30769822	0.0280874	0.125526	0.157	0.134	1	ENSMUST00000059078	Fam43a	ENSMUSG00000046546	protein_coding	utr	chr16-30601875-30602797	chr16-30768848-30769822	166050
chr4-145214053-145215020	0.0281072	-0.160979	0.065	0.139	1	ENSMUST00000030336	Tnfrsf1b	ENSMUSG00000028599	protein_coding	utr	chr4-145213463-145215786	chr4-145214053-145215020	0
chr5-75377480-75378169	0.0281187	-0.252462	0.028	0.081	1	ENSMUST00000189090	Gm29465	ENSMUSG00000101461	lincRNA	exon	chr5-75353203-75353252	chr5-75377480-75378169	24227
chr8-25090208-25091542	0.0281206	-0.153711	0.043	0.114	1	ENSMUST00000125466	Plekha2	ENSMUSG00000031557	protein_coding	utr	chr8-25091283-25091346	chr8-25090208-25091542	0
chr4-88867179-88868606	0.0281274	-0.17594	0.102	0.225	1	ENSMUST00000057837	4930553M12Rik	ENSMUSG00000054351	protein_coding	cds	chr4-88867882-88868379	chr4-88867179-88868606	0
chr3-115758203-115759299	0.0281611	-0.19276	0.062	0.159	1	ENSMUST00000055676	S1pr1	ENSMUSG00000045092	protein_coding	exon	chr3-115714709-115715055	chr3-115758203-115759299	43147
chr10-94311549-94312775	0.0281808	-0.191562	0.028	0.091	1	ENSMUST00000132743	Tmcc3	ENSMUSG00000020023	protein_coding	utr	chr10-94312024-94312202	chr10-94311549-94312775	0
chr18-32138510-32139879	0.0282058	0.119748	0.05	0.038	1	ENSMUST00000171765	Proc	ENSMUSG00000024386	protein_coding	utr	chr18-32139510-32139570	chr18-32138510-32139879	0
chr7-89418853-89419320	0.028254	-0.194531	0.022	0.073	1	ENSMUST00000058755	Fzd4	ENSMUSG00000049791	protein_coding	utr	chr7-89408361-89410110	chr7-89418853-89419320	8742
chr2-155356555-155358023	0.0282707	-0.174828	0.11	0.242	1	ENSMUST00000165234	Pigu	ENSMUSG00000038383	protein_coding	cds	chr2-155357266-155357395	chr2-155356555-155358023	0
chr12-36155093-36158218	0.0283197	-0.144771	0.292	0.444	1	ENSMUST00000041640	Ankmy2	ENSMUSG00000036188	protein_coding	cds	chr12-36157357-36157423	chr12-36155093-36158218	0
chr11-63092243-63092643	0.0283699	-0.242982	0.013	0.051	1	ENSMUST00000035732	Tekt3	ENSMUSG00000042189	protein_coding	gap	chr11-63087362-63094625	chr11-63092243-63092643	0
chr17-73964898-73965145	0.0283921	-0.28464	0.015	0.071	1	ENSMUST00000024866	Xdh	ENSMUSG00000024066	protein_coding	exon	chr17-73950078-73950182	chr17-73964898-73965145	14715
chr9-57764193-57766394	0.028397	-0.155984	0.267	0.412	1	ENSMUST00000065330	Clk3	ENSMUSG00000032316	protein_coding	cds	chr9-57765074-57765517	chr9-57764193-57766394	0
chr12-74316671-74317398	0.0284597	0.103405	0.052	0.035	1	ENSMUST00000110441	Gm11042	ENSMUSG00000079061	protein_coding	exon	chr12-74316357-74316394	chr12-74316671-74317398	276
[truncated: 7,544 more rows]
