# Supplementary material for: Single-cell multiomics reveals endothelial mechanosensitive PIEZO1 coupling IL-33 regulates the development of pulmonary fibrosis
Source: Research Square preprint supplement (doi:10.21203/rs.3.rs-4861689/v1), 2024-09-06
Supplement: Supplementary file 6 [file Table S2.xlsx]

## Sheet: Sheet1
number	diagnosis	Sample ID	Estimated Number of Cells	Mean Reads per Cell	Median Genes per Cell	Number of Reads	Median UMI Counts per Cell
1	HC	HC1	8566	42300	1741	362337801	3297
2	HC	HC2	9784	38287	1600	374603741	2814
5	IPF	IPF1	7582	47573	1568	360696501	2786
6	IPF	IPF2	9893	34786	1883	344133892	3435
7	IPF	IPF3	9490	40990	1412	388992305	2324
