# Supplementary material for: Single-cell multiomics reveals endothelial mechanosensitive PIEZO1 coupling IL-33 regulates the development of pulmonary fibrosis
Source: Research Square preprint supplement (doi:10.21203/rs.3.rs-4861689/v1), 2024-09-06
Supplement: Supplementary file 7 [file Table S3.xlsx]

## Sheet: Sheet1
Cell type proportions identified from the merged analysis of human lung samples
Celltype	Number	proportions（%）
AT2	18100	37.24
AT1	8669	17.84
ECs	7107	14.62
Fibroblasts	5676	11.68
Macrophage	4535	9.33
T/Bcells	1388	2.86
Basal	1329	2.73
SMCs	1203	2.48
Ciliated	599	1.23
