# Supplementary material for: Single-cell multiomics reveals endothelial mechanosensitive PIEZO1 coupling IL-33 regulates the development of pulmonary fibrosis
Source: Research Square preprint supplement (doi:10.21203/rs.3.rs-4861689/v1), 2024-09-06
Supplement: Supplementary file 8 [file Table S4.xlsx]

## Sheet: Sheet1
Supplenetary Table 4: Mice Sequencing Data Summary
Type	Organism	disease state	sample-name	Estimated Number of cells	Median Fragments per cell	Fraction of fragments overlapping any targeted region	Fraction of transposition events in peaks in cell barcodes	Total number of read pairs	Fraction of read pairs with a valid barcode	Enrichment score of transcription start sites	Fraction of fragments overlapping called peaks
scATAC	Mouse	Silica	Silica1	3035	13939	0.779	0.599	275153862	0.971	15.04	0.624
scATAC	Mouse	Silica	Silica2	3234	15572	0.772	0.59	275291853	0.971	13.59	0.614
scATAC	Mouse	Silica	Silica3	4666	8037	0.772	0.587	270267227	0.971	14.9	0.613
scATAC	Mouse	Saline	Saline1	2,235	16,962	0.773	0.543	465473559	0.973	13.6	0.574
scATAC	Mouse	Saline	Saline2	9744	11191	0.678	0.526	653606600	0.968	10.86	0.545
scATAC	Mouse	Saline	Saline3	3661	11872	0.75	0.568	314837262	0.971	14.79	0.592
