# Supplementary material for: Single-cell multiomics reveals endothelial mechanosensitive PIEZO1 coupling IL-33 regulates the development of pulmonary fibrosis
Source: Research Square preprint supplement (doi:10.21203/rs.3.rs-4861689/v1), 2024-09-06
Supplement: Supplementary file 9 [file Table S5.xlsx]

## Sheet: Sheet1
Supplenetary Table 5: Mice scRNA sequencing Data Summary
Type	Organism	disease state	sample-name	Number of Reads	Number of Cells (Spots)	Mean Reads/Barcode	Median Genes/Barcode	Median UMI/Barcode
scRNA	Mouse	Silica	Silica1	561537245	6736	83364	1480	5380
scRNA	Mouse	Silica	Silica2	536956322	6984	76884	1466	4997
scRNA	Mouse	Silica	Silica3	608421991	7801	77993	1444	5331
scRNA	Mouse	Saline	Saline1	611533533	6590	92797	1339	3772
scRNA	Mouse	Saline	Saline2	482070773	7982	60395	1593	4588
scRNA	Mouse	Saline	Saline3	517487837	4593	112669	1399	5032
