# Supplementary material for: Single-cell multiomics reveals endothelial mechanosensitive PIEZO1 coupling IL-33 regulates the development of pulmonary fibrosis
Source: Research Square preprint supplement (doi:10.21203/rs.3.rs-4861689/v1), 2024-09-06
Supplement: Supplementary file 10 [file Table S6.xlsx]

## Sheet: Sheet1
Table S6. Cell type proportions identified from the merged analysis of the SiO2-induced mouse model lung samples
Celltype	Number	proportions（%）
scATAC
ILC	1117	4.2032
macrophage	2976	11.1985
Neutrophils	2642	9.94167
B cell	4482	16.8655
Clara cell	38	0.142992
monocyte	4454	16.7601
natural killer cell	735	2.76576
Mast cell	39	0.146754
AT1	1404	5.28316
endothelial cell	1076	4.04892
epithelial cell	453	1.70461
T cell	1983	7.4619
dendritic cell	702	2.64158
stromal cell	1740	6.54751
Smooth muscle cells	256	0.963311
Baso	76	0.285983
AT2	907	3.41298
Pericytes	93	0.349953
ciliated cell	165	0.620884
Matrix	1237	4.65475
scRNA
dendritic cell	1826	4.6763
B cell	9483	24.2855
AT2	3171	8.12077
macrophage	1812	4.64044
Neutrophils	7863	20.1368
ILC	1221	3.12692
T cell	3481	8.91467
endothelial cell	1600	4.09752
Pericytes	251	0.642799
Clara cell	390	0.998771
natural killer cell	774	1.98218
monocyte	2401	6.14884
Matrix	3427	8.77638
ciliated cell	270	0.691457
Baso	88	0.225364
AT1	307	0.786212
stromal cell	159	0.407191
Smooth muscle cells	512	1.31121
epithelial cell	11	0.0281705
Mast cell	1	0.00256095
