# Supplementary material for: Single-cell multiomics reveals endothelial mechanosensitive PIEZO1 coupling IL-33 regulates the development of pulmonary fibrosis
Source: Research Square preprint supplement (doi:10.21203/rs.3.rs-4861689/v1), 2024-09-06
Supplement: Supplementary file 11 [file Table S7.xlsx]

## Sheet: Sheet 1
p_val	avg_log2FC	pct.1	pct.2	p_val_adj	cluster	gene
0	9.90227	0.527	0.084	0	ILC	Pdcd1
0	9.89689	0.315	0.028	0	ILC	Ccr8
0	8.30864	0.28	0.029	0	ILC	Il2
0	5.1103	0.519	0.068	0	ILC	5430421N21Rik
0	3.13742	0.606	0.101	0	ILC	Icos
0	1.64468	0.427	0.062	0	ILC	Cxcr6
0	1.2857	0.295	0.014	0	ILC	Il5
0	1.11159	0.294	0.03	0	ILC	Olfr530
0	1.06095	0.671	0.167	0	ILC	Fbxo27
0	0.983195	0.275	0.03	0	ILC	Apol9a
1.60699e-299	1.22987	0.251	0.03	3.50436e-295	ILC	Olfr525
5.44619e-247	4.46831	0.436	0.108	1.18765e-242	ILC	Mycn
5.36976e-237	1.369	0.498	0.141	1.17098e-232	ILC	Ltb4r1
3.1824e-226	0.740262	0.373	0.085	6.93985e-222	ILC	Tnfrsf25
1.90114e-213	0.644919	0.279	0.051	4.14581e-209	ILC	Art2b
4.0548e-208	0.31369	0.286	0.055	8.84229e-204	ILC	Csf2
4.69003e-193	0.789066	0.322	0.072	1.02276e-188	ILC	Thy1
4.07241e-192	1.16513	0.483	0.158	8.88071e-188	ILC	Adcy4
6.67232e-144	0.519921	0.279	0.07	1.45503e-139	ILC	Lcn4
5.96792e-142	1.16226	0.296	0.079	1.30143e-137	ILC	Cryba4
3.40905e-138	1.893	0.265	0.066	7.43411e-134	ILC	Cysltr1
3.36684e-133	4.08211	0.368	0.12	7.34207e-129	ILC	Fgl2
6.85614e-100	2.51461	0.353	0.131	1.49512e-95	ILC	Scrt1
5.73656e-99	0.727479	0.285	0.095	1.25097e-94	ILC	Il9r
3.08918e-96	6.3244	0.292	0.096	6.73658e-92	ILC	A630076J17Rik
9.15618e-77	30.4789	0.269	0.098	1.99669e-72	ILC	Gpr114
9.70431e-72	238.227	0.2	0.465	2.11622e-67	ILC	Lrrk2
1.42986e-48	21.8182	0.573	0.355	3.1181e-44	ILC	Rpap2
6.67885e-47	11.7239	0.451	0.256	1.45646e-42	ILC	Sgip1
3.05196e-46	66.5188	0.534	0.324	6.6554e-42	ILC	Greb1l
4.03129e-44	20.3798	0.626	0.407	8.79103e-40	ILC	Sec11a
7.83339e-42	2.36966	0.33	0.177	1.70823e-37	ILC	Samd14
1.9541e-37	27.5833	0.435	0.262	4.2613e-33	ILC	Lphn1
5.62266e-32	7.79562	0.337	0.191	1.22613e-27	ILC	Foxo4
1.2851e-31	1.615	0.293	0.159	2.80242e-27	ILC	Gm10130
3.12491e-30	27.5894	0.43	0.269	6.81448e-26	ILC	Hace1
8.3863e-30	34.6232	0.606	0.445	1.8288e-25	ILC	Galnt10
7.87776e-28	1.625	0.549	0.381	1.7179e-23	ILC	Celf1
6.49071e-27	24.7077	0.351	0.212	1.41543e-22	ILC	Mtcl1
1.15512e-26	8.82732	0.311	0.184	2.51896e-22	ILC	Hdac11
1.92653e-24	2.61269	0.372	0.234	4.20118e-20	ILC	Ccdc102a
2.70672e-24	10.2811	0.204	0.344	5.90255e-20	ILC	Alpk1
1.44514e-23	23.2655	0.692	0.529	3.15142e-19	ILC	Fndc3a
1.14501e-21	47.7646	0.408	0.275	2.49693e-17	ILC	Leo1
2.96697e-19	34.807	0.487	0.346	6.47007e-15	ILC	Itgb3bp
2.0181e-17	4.50817	0.578	0.439	4.40088e-13	ILC	Tbcd
8.08908e-17	1.62503	0.536	0.402	1.76399e-12	ILC	Zfp800
1.00473e-16	130.025	0.3	0.38	2.19103e-12	ILC	Pax5
7.47102e-16	76.6452	0.341	0.235	1.6292e-11	ILC	Tmem209
1.03495e-15	11.4705	0.534	0.402	2.25691e-11	ILC	Anp32b
1.13651e-15	40.5737	0.256	0.354	2.47838e-11	ILC	Pkib
2.15634e-15	31.7332	0.355	0.248	4.70234e-11	ILC	Gm20449
2.19333e-15	7.0964	0.325	0.224	4.78299e-11	ILC	Pabpc1l
6.50682e-15	132.907	0.188	0.288	1.41894e-10	ILC	Gfra1
1.76296e-12	18.4854	0.312	0.224	3.84448e-08	ILC	Epb4.1l4a
4.54007e-12	190.52	0.448	0.34	9.90053e-08	ILC	Zbtb7c
5.22002e-11	0.342533	0.259	0.182	1.13833e-06	ILC	Ppapdc1b
8.00453e-11	65.1032	0.435	0.332	1.74555e-06	ILC	Ccdc50
5.12097e-10	69.4272	0.453	0.356	1.11673e-05	ILC	Kif18a
6.30864e-10	1.62454	0.491	0.387	1.37573e-05	ILC	Atrn
6.58728e-10	23.2654	0.368	0.277	1.43649e-05	ILC	Ddx58
1.14183e-09	7.21129	0.338	0.254	2.49e-05	ILC	Uba1
7.33066e-09	14.8424	0.262	0.189	0.00015986	ILC	Exosc9
3.48104e-08	8.8385	0.655	0.535	0.000759109	ILC	Bptf
4.73006e-08	5.95311	0.369	0.284	0.00103148	ILC	Unc13b
5.11438e-07	13.1661	0.358	0.287	0.0111529	ILC	Usp14
8.76875e-05	20.3801	0.321	0.36	1	ILC	Iqck
0.000280322	16.9726	0.439	0.374	1	ILC	Nup93
0.000458607	18.9338	0.254	0.206	1	ILC	Gatsl2
0.000548542	11.7142	0.526	0.452	1	ILC	Pbx3
0.000632331	4.43113	0.385	0.327	1	ILC	Tcea1
0.0010575	3.03847	0.254	0.211	1	ILC	Rps6kb2
0.00136642	8.836	0.278	0.233	1	ILC	Wbscr16
0.00232859	108.375	0.283	0.242	1	ILC	Gnao1
0.00276105	14.6041	0.337	0.357	1	ILC	Rin2
0.00848776	1.5434	0.293	0.253	1	ILC	2810004N23Rik
0	30.2454	0.558	0.231	0	macrophage	Plin2
0	30.1048	0.46	0.181	0	macrophage	Bend6
0	25.2151	0.472	0.168	0	macrophage	Abcd2
0	20.3353	0.514	0.201	0	macrophage	Slc11a1
0	19.9554	0.535	0.219	0	macrophage	C5ar1
0	17.4142	0.563	0.257	0	macrophage	Alox5ap
0	15.5159	0.465	0.185	0	macrophage	Tgfbi
0	12.9479	0.26	0.048	0	macrophage	Trim29
0	9.91568	0.525	0.201	0	macrophage	Cd300a
0	9.01486	0.291	0.068	0	macrophage	Sh2d1b1
0	7.723	0.463	0.158	0	macrophage	Pilra
0	6.59127	0.26	0.055	0	macrophage	Ccl6
0	4.99101	0.365	0.108	0	macrophage	Gm28845
0	4.42997	0.498	0.176	0	macrophage	Kif1a
0	4.40425	0.337	0.097	0	macrophage	F7
0	3.91426	0.353	0.099	0	macrophage	AI607873
0	3.2576	0.365	0.108	0	macrophage	D630023F18Rik
0	2.06278	0.611	0.247	0	macrophage	Tnfaip2
0	1.28004	0.478	0.174	0	macrophage	Cd33
0	0.593962	0.541	0.231	0	macrophage	Adgb
1.11406e-305	6.3246	0.527	0.22	2.42943e-301	macrophage	Pdpn
2.24335e-294	11.3909	0.303	0.085	4.89207e-290	macrophage	Clec7a
1.78479e-293	5.33111	0.37	0.123	3.89208e-289	macrophage	Fcgr4
1.17158e-290	9.20075	0.464	0.188	2.55487e-286	macrophage	Csf1r
6.96152e-290	37.614	0.553	0.259	1.5181e-285	macrophage	Pla2g4a
7.9305e-289	34.7265	0.491	0.207	1.7294e-284	macrophage	Naip2
2.39967e-284	15.5923	0.491	0.218	5.23296e-280	macrophage	Lgals3
2.43594e-281	18.8569	0.507	0.224	5.31205e-277	macrophage	Jph3
2.62967e-278	7.07475	0.508	0.205	5.73453e-274	macrophage	Clec4d
4.54054e-277	13.0901	0.509	0.248	9.90156e-273	macrophage	Mrc1
2.81927e-274	14.8724	0.325	0.106	6.14799e-270	macrophage	Plet1
3.32947e-269	29.2185	0.474	0.216	7.26059e-265	macrophage	Pparg
1.27215e-261	11.4179	0.496	0.222	2.77417e-257	macrophage	Cd300lf
4.01986e-260	0.965046	0.395	0.147	8.76612e-256	macrophage	Tlr13
5.45325e-260	48.5861	0.51	0.244	1.18919e-255	macrophage	Adap2
3.49833e-259	70.7939	0.658	0.377	7.62881e-255	macrophage	Pid1
1.74775e-255	24.2454	0.399	0.166	3.81133e-251	macrophage	Mfsd7c
1.17138e-254	7.40496	0.442	0.188	2.55443e-250	macrophage	Csf2rb
1.26736e-254	79.4462	0.725	0.479	2.76373e-250	macrophage	Cd9
7.42861e-254	66.4654	0.707	0.445	1.61996e-249	macrophage	Lrp1
7.67269e-251	24.6277	0.719	0.449	1.67318e-246	macrophage	Rab20
1.54782e-248	8.7686	0.274	0.08	3.37533e-244	macrophage	Ccl9
2.17425e-248	34.7677	0.654	0.388	4.74138e-244	macrophage	Pstpip2
2.37978e-245	33.2839	0.472	0.221	5.18959e-241	macrophage	Sh3pxd2b
1.31105e-244	27.2237	0.478	0.223	2.85901e-240	macrophage	Pik3r6
4.1093e-244	7.34585	0.298	0.092	8.96114e-240	macrophage	Cd300lb.1
4.93914e-244	3.06967	0.28	0.084	1.07708e-239	macrophage	Arl11
1.96382e-243	37.6084	0.466	0.215	4.28251e-239	macrophage	Rnf144b
7.89481e-243	70.7939	0.639	0.388	1.72162e-238	macrophage	Mitf
7.35224e-242	65.4651	0.729	0.464	1.6033e-237	macrophage	Itgb2
1.06655e-241	24.4947	0.404	0.154	2.32583e-237	macrophage	Cd300c
3.26631e-241	4.887	0.303	0.097	7.12283e-237	macrophage	Klra2
3.23302e-239	43.3827	0.767	0.537	7.05025e-235	macrophage	App
5.70727e-239	7.31889	0.41	0.164	1.24458e-234	macrophage	Nlrp1b
3.24278e-237	31.8412	0.834	0.618	7.07152e-233	macrophage	Fndc3b
2.37909e-236	5.05244	0.382	0.146	5.18808e-232	macrophage	Ptplad2
3.82638e-236	61.6513	0.699	0.441	8.34418e-232	macrophage	Spi1
1.76712e-234	21.622	0.451	0.211	3.85355e-230	macrophage	Axl
3.4661e-232	35.9468	0.452	0.22	7.55852e-228	macrophage	Atp6v0d2
3.68245e-232	33.8488	0.741	0.479	8.03031e-228	macrophage	Gab2
2.13723e-230	8.18428	0.317	0.107	4.66066e-226	macrophage	Cd300lb
4.41245e-230	17.3881	0.634	0.371	9.62224e-226	macrophage	Gsr
1.65263e-224	5.92906	0.373	0.147	3.60389e-220	macrophage	C1rl
5.15765e-223	7.73611	0.327	0.119	1.12473e-218	macrophage	Serpine1
7.41425e-223	4.43	0.628	0.388	1.61683e-218	macrophage	Dhrs3
2.1765e-221	72.2104	0.598	0.333	4.74629e-217	macrophage	Ugt1a9
3.70594e-221	43.3827	0.703	0.497	8.08155e-217	macrophage	Nceh1
1.58719e-218	83.7513	0.604	0.341	3.46117e-214	macrophage	Ugt1a10
1.97116e-218	7.79202	0.476	0.223	4.29852e-214	macrophage	Tlr2
2.08938e-218	10.016	0.499	0.237	4.55631e-214	macrophage	Havcr2
9.12663e-218	4.88193	0.351	0.138	1.99024e-213	macrophage	P2ry13
1.26014e-217	25.7943	0.523	0.266	2.74799e-213	macrophage	Aatk
6.31224e-217	4.80504	0.287	0.096	1.37651e-212	macrophage	Mfsd7a
2.46932e-216	22.551	0.526	0.272	5.38485e-212	macrophage	C130050O18Rik
1.6776e-215	21.9454	0.49	0.262	3.65833e-211	macrophage	Pdgfc
4.31452e-214	16.3626	0.331	0.12	9.40868e-210	macrophage	Ccl3
3.50215e-213	19.4487	0.453	0.21	7.63715e-209	macrophage	Fcgr3
1.34537e-212	232.335	0.821	0.635	2.93385e-208	macrophage	Abr
5.82064e-212	118.402	0.643	0.376	1.26931e-207	macrophage	Gcnt2
1.65025e-211	12.8662	0.385	0.162	3.59869e-207	macrophage	Mt1
2.20452e-211	2.98875	0.377	0.158	4.80739e-207	macrophage	Cd200r1
1.66314e-208	46.2681	0.694	0.472	3.6268e-204	macrophage	Col15a1
9.91185e-208	43.8213	0.668	0.421	2.16148e-203	macrophage	Lipc
7.20157e-205	67.9015	0.47	0.217	1.57045e-200	macrophage	Ptafr
3.14792e-204	13.0008	0.381	0.164	6.86466e-200	macrophage	Emr1
3.39166e-203	57.7835	0.574	0.321	7.39619e-199	macrophage	Ugt1a8
6.91939e-203	7.31476	0.262	0.083	1.50891e-198	macrophage	Gm17268
1.17669e-202	27.5109	0.648	0.395	2.56602e-198	macrophage	Emilin2
1.4559e-202	78.011	0.77	0.56	3.17489e-198	macrophage	Zeb2
6.61615e-202	4.42997	0.702	0.467	1.44278e-197	macrophage	Rab31
2.80051e-201	54.8542	0.568	0.316	6.10707e-197	macrophage	Ugt1a7c
1.53524e-200	6.13672	0.251	0.08	3.3479e-196	macrophage	Tmem52b
1.57207e-200	31.841	0.572	0.331	3.42822e-196	macrophage	Creb5
6.14711e-197	39.0547	0.505	0.289	1.3405e-192	macrophage	Nrg4
7.20543e-197	3.39003	0.48	0.218	1.57129e-192	macrophage	Cxcl2
2.63951e-196	33.285	0.591	0.336	5.75598e-192	macrophage	Parvb
2.16934e-194	7.31659	0.344	0.142	4.73068e-190	macrophage	Tmem132a
2.51022e-191	40.1096	0.501	0.271	5.47403e-187	macrophage	Tmbim1
6.30416e-191	8.88811	0.288	0.105	1.37475e-186	macrophage	Gm10645
2.78994e-190	13.0569	0.593	0.368	6.08401e-186	macrophage	Rassf4
3.20107e-190	8.15479	0.314	0.125	6.98058e-186	macrophage	Gpnmb
3.02745e-188	5.75221	0.279	0.098	6.60196e-184	macrophage	Hcar2
5.94827e-188	5.54775	0.267	0.093	1.29714e-183	macrophage	Siglecf
7.68332e-188	40.4974	0.717	0.491	1.6755e-183	macrophage	Cers6
1.49819e-187	33.2729	0.679	0.451	3.26711e-183	macrophage	Nek6
8.78452e-187	22.7058	0.623	0.375	1.91564e-182	macrophage	Cyth4
1.12332e-186	3.20086	0.272	0.095	2.44961e-182	macrophage	Tmem150b
3.04545e-186	20.4028	0.505	0.257	6.64122e-182	macrophage	Gpr35
1.47287e-185	30.1434	0.463	0.226	3.21188e-181	macrophage	Pla2g7
1.68491e-185	14.0244	0.461	0.225	3.67428e-181	macrophage	Aqp9
3.51598e-185	10.2008	0.694	0.466	7.66729e-181	macrophage	Atp8b4
9.24764e-185	43.3731	0.689	0.475	2.01663e-180	macrophage	Agap1
2.58444e-182	20.6022	0.551	0.322	5.63589e-178	macrophage	Gusb
5.63271e-182	32.0274	0.706	0.464	1.22833e-177	macrophage	Plek
1.40785e-180	50.5925	0.416	0.21	3.07009e-176	macrophage	Chd5
9.37146e-180	23.0242	0.455	0.229	2.04363e-175	macrophage	Ptpro
2.96784e-179	1.54684	0.762	0.542	6.47197e-175	macrophage	Ptpre
7.70152e-179	21.7715	0.614	0.393	1.67947e-174	macrophage	Ctsb
7.79745e-179	50.1443	0.533	0.291	1.70039e-174	macrophage	Dner
2.13741e-178	4.28543	0.29	0.109	4.66105e-174	macrophage	Il1a
6.79268e-177	40.4954	0.594	0.353	1.48128e-172	macrophage	Tgm2
1.80378e-176	11.8266	0.469	0.262	3.93351e-172	macrophage	Mtmr7
5.93315e-176	84.7689	0.71	0.508	1.29384e-171	macrophage	Prr5l
2.48556e-175	52.0397	0.742	0.536	5.42025e-171	macrophage	Rab37
2.73144e-175	1.64573	0.404	0.185	5.95645e-171	macrophage	Ccr1
6.74694e-175	9.72335	0.428	0.207	1.47131e-170	macrophage	Rab32
1.23496e-174	14.9638	0.377	0.176	2.69309e-170	macrophage	Slc36a4
2.45073e-174	9.00225	0.334	0.142	5.3443e-170	macrophage	Itpripl2
4.28194e-174	7.31536	0.392	0.188	9.33762e-170	macrophage	Ccdc109b
5.36584e-174	183.314	0.416	0.655	1.17013e-169	macrophage	Ablim1
2.53046e-173	132.326	0.81	0.63	5.51818e-169	macrophage	Cdk6
1.97948e-172	22.978	0.504	0.288	4.31665e-168	macrophage	Dagla
3.98159e-172	48.7013	0.673	0.421	8.68265e-168	macrophage	Ncf4
1.59288e-171	1.96181	0.336	0.14	3.47359e-167	macrophage	Tnfsf13b
2.40937e-171	47.7068	0.63	0.389	5.25411e-167	macrophage	Mtus1
3.8775e-171	9.87101	0.411	0.2	8.45566e-167	macrophage	Clec1a
4.11663e-171	1.54458	0.521	0.293	8.97712e-167	macrophage	Nfam1
4.35651e-171	26.201	0.608	0.364	9.50024e-167	macrophage	Slc15a3
1.42715e-170	14.2717	0.44	0.223	3.11218e-166	macrophage	Cebpa
8.20695e-170	52.3414	0.443	0.232	1.78969e-165	macrophage	Atg4c
8.89874e-170	30.3076	0.504	0.277	1.94055e-165	macrophage	Piwil2
3.26806e-169	18.8569	0.626	0.41	7.12666e-165	macrophage	Rxra
1.28197e-168	110.598	0.718	0.496	2.7956e-164	macrophage	Pik3r5
2.63601e-168	16.1911	0.52	0.296	5.74835e-164	macrophage	Klhdc4
4.83748e-168	2.98728	0.81	0.643	1.05491e-163	macrophage	Rbm47
1.8189e-167	5.87239	0.423	0.211	3.96646e-163	macrophage	Clec12a
2.69713e-167	5.952	0.696	0.517	5.88163e-163	macrophage	Fnip2
5.21984e-167	7.31536	0.783	0.593	1.13829e-162	macrophage	Ubash3b
2.35727e-165	46.2681	0.668	0.446	5.1405e-161	macrophage	Dock5
7.89618e-165	3.01122	0.346	0.154	1.72192e-160	macrophage	Aifm2
7.12475e-163	37.612	0.791	0.499	1.55369e-158	macrophage	Syk
1.48328e-162	11.8571	0.467	0.256	3.23459e-158	macrophage	Nlrx1
1.75497e-162	26.2483	0.604	0.377	3.82705e-158	macrophage	Ctsz
3.68469e-162	4.40397	0.564	0.344	8.03519e-158	macrophage	Myo1f
2.39474e-160	21.2904	0.682	0.486	5.22221e-156	macrophage	Tbc1d2
4.88879e-160	89.5131	0.598	0.379	1.0661e-155	macrophage	Cped1
6.28925e-160	20.3923	0.459	0.255	1.3715e-155	macrophage	Trf
1.13059e-159	35.6834	0.664	0.459	2.46548e-155	macrophage	Hk2
1.35249e-159	56.3603	0.399	0.202	2.94938e-155	macrophage	Sdc3
1.42038e-158	17.4137	0.416	0.215	3.09742e-154	macrophage	Gas2l3
1.83123e-157	99.831	0.852	0.716	3.99337e-153	macrophage	Etv6
6.53631e-156	26.9079	0.344	0.154	1.42537e-151	macrophage	Fcer1g
9.36391e-156	17.4139	0.399	0.205	2.04199e-151	macrophage	Gm14221
1.60392e-155	60.6951	0.757	0.566	3.49767e-151	macrophage	Osbpl3
2.99366e-155	17.4142	0.718	0.519	6.52828e-151	macrophage	Jazf1
3.76767e-155	11.4786	0.316	0.133	8.21616e-151	macrophage	Sirpb1b
4.65255e-152	6.47954	0.427	0.227	1.01458e-147	macrophage	C5ar2
5.44394e-152	47.7109	0.733	0.55	1.18716e-147	macrophage	Cubn
6.10412e-152	37.124	0.605	0.386	1.33113e-147	macrophage	Daglb
9.47668e-152	33.7193	0.671	0.473	2.06658e-147	macrophage	Fam129a
1.97547e-151	71.9834	0.626	0.441	4.30791e-147	macrophage	Dapk1
4.72607e-151	47.6153	0.489	0.277	1.03061e-146	macrophage	Ptges
6.13937e-151	80.7945	0.735	0.567	1.33881e-146	macrophage	Cd44
6.50208e-151	26.6427	0.427	0.212	1.41791e-146	macrophage	Lilrb4
8.84585e-151	131.387	0.815	0.607	1.92901e-146	macrophage	Prkch
4.87722e-150	7.31537	0.425	0.229	1.06357e-145	macrophage	Tnfsf12Tnfsf13
7.23903e-150	61.7675	0.684	0.49	1.57862e-145	macrophage	Sh3bp2
2.30516e-149	3.35552	0.471	0.263	5.02686e-145	macrophage	Smpdl3b
2.46341e-148	5.9106	0.301	0.128	5.37197e-144	macrophage	Gsg1
3.32318e-148	4.36475	0.355	0.165	7.24687e-144	macrophage	Exoc3l4
4.16973e-148	30.3985	0.72	0.495	9.09294e-144	macrophage	Fmnl2
1.25423e-146	16.1044	0.498	0.305	2.73511e-142	macrophage	Dhrs7b
3.80366e-146	17.8364	0.331	0.156	8.29463e-142	macrophage	Dlec1
2.32781e-145	13.0338	0.266	0.107	5.07626e-141	macrophage	Adrb1
1.43771e-144	30.8574	0.66	0.424	3.13522e-140	macrophage	Ncf2
2.14087e-144	7.69539	0.407	0.225	4.6686e-140	macrophage	Bhlhe41
5.20151e-144	8.25305	0.368	0.178	1.13429e-139	macrophage	Mpeg1
5.89886e-143	41.6895	0.585	0.382	1.28636e-138	macrophage	Tmem180
2.95014e-142	109.561	0.762	0.579	6.43338e-138	macrophage	Dgkz
2.97639e-142	24.6266	0.573	0.383	6.49062e-138	macrophage	Best1
3.28646e-142	13.4452	0.42	0.222	7.16677e-138	macrophage	Cybb
1.1428e-141	60.512	0.774	0.613	2.49211e-137	macrophage	Trps1
9.82869e-141	49.2764	0.445	0.251	2.14334e-136	macrophage	Plekhm2
1.8069e-140	40.4616	0.599	0.417	3.9403e-136	macrophage	Ctsd
2.76073e-139	5.68647	0.419	0.223	6.02033e-135	macrophage	Lrp4
4.4436e-139	29.6792	0.548	0.336	9.69016e-135	macrophage	Efhd2
7.43178e-139	61.6855	0.575	0.376	1.62065e-134	macrophage	Tm9sf4
9.42615e-139	5.86976	0.392	0.204	2.05556e-134	macrophage	Mreg
1.06519e-138	102.976	0.54	0.336	2.32287e-134	macrophage	Lrp8
1.93252e-137	14.0185	0.374	0.191	4.21424e-133	macrophage	Slc35f6
3.09799e-137	36.1431	0.442	0.248	6.75578e-133	macrophage	Ugt1a6b
4.53579e-137	21.7423	0.583	0.388	9.89119e-133	macrophage	Mknk1
6.70385e-137	2.61494	0.319	0.144	1.46191e-132	macrophage	Mcemp1
1.6119e-136	52.0486	0.673	0.503	3.51506e-132	macrophage	Slc16a10
1.44233e-135	20.0023	0.311	0.142	3.14528e-131	macrophage	Hebp1
1.92073e-135	19.0698	0.528	0.304	4.18854e-131	macrophage	Lrrc25
6.46847e-135	24.6081	0.501	0.286	1.41058e-130	macrophage	Cyp4f18
4.39805e-134	7.33186	0.546	0.333	9.59083e-130	macrophage	Slfn2
7.88252e-133	4.42913	0.454	0.256	1.71894e-128	macrophage	Aldh3b1
1.94763e-131	14.4093	0.59	0.388	4.2472e-127	macrophage	Nat9
2.29207e-131	131.823	0.776	0.622	4.99832e-127	macrophage	Slc6a6
4.88135e-131	46.0003	0.579	0.392	1.06448e-126	macrophage	Lipa
4.67166e-130	1.58974	0.588	0.391	1.01875e-125	macrophage	Amz1
6.95211e-130	17.4154	0.46	0.268	1.51605e-125	macrophage	Slc31a2
2.87099e-129	27.5131	0.657	0.491	6.26076e-125	macrophage	Tmcc1
4.35573e-129	11.4375	0.648	0.451	9.49855e-125	macrophage	Rnf149
3.75985e-127	78.0074	0.514	0.328	8.19911e-123	macrophage	Slpi
4.61285e-126	44.5796	0.516	0.347	1.00592e-121	macrophage	Lima1
6.25362e-126	13.0775	0.444	0.245	1.36373e-121	macrophage	Tyrobp
2.31313e-125	82.3355	0.748	0.574	5.04425e-121	macrophage	Rab8b
5.15677e-125	12.0261	0.387	0.203	1.12454e-120	macrophage	Sqrdl
1.83409e-124	5.87645	0.486	0.293	3.99959e-120	macrophage	Nsl1
4.60942e-124	80.8915	0.595	0.431	1.00518e-119	macrophage	Mgll
9.71991e-124	29.3993	0.538	0.347	2.11962e-119	macrophage	Fes
1.86751e-123	23.1788	0.615	0.395	4.07249e-119	macrophage	Pla1a
2.09973e-123	108.304	0.737	0.578	4.57887e-119	macrophage	Ergic1
6.25908e-123	15.951	0.463	0.263	1.36492e-118	macrophage	Cd68
8.22399e-123	164.569	0.847	0.72	1.79341e-118	macrophage	Lrrfip1
8.45443e-123	107.852	0.725	0.52	1.84366e-118	macrophage	Gas7
1.09793e-122	2.9871	0.573	0.386	2.39425e-118	macrophage	Hspbap1
1.41781e-122	140.043	0.758	0.588	3.09182e-118	macrophage	Tfeb
5.32747e-122	44.8254	0.599	0.415	1.16176e-117	macrophage	Glipr1
1.3777e-121	34.7266	0.641	0.501	3.00434e-117	macrophage	Tcf7l2
3.20013e-121	86.6443	0.703	0.558	6.97852e-117	macrophage	Mgat4b
4.84476e-121	34.7263	0.614	0.442	1.0565e-116	macrophage	Lrrfip2
3.18565e-120	5.38839	0.27	0.118	6.94694e-116	macrophage	Cfp
3.34824e-120	3.24664	0.311	0.148	7.30152e-116	macrophage	Rnd3
7.3019e-120	7.10092	0.261	0.112	1.59233e-115	macrophage	Tgm3
3.35981e-119	59.2426	0.773	0.561	7.32675e-115	macrophage	Lyn
1.06181e-118	10.2696	0.354	0.18	2.31548e-114	macrophage	Plcd1
3.17177e-118	11.6434	0.505	0.311	6.91668e-114	macrophage	Lcp2
4.80798e-118	5.4704	0.296	0.139	1.04848e-113	macrophage	Ticam2
5.04212e-118	52.1196	0.629	0.423	1.09954e-113	macrophage	Smim3
6.41493e-118	84.2204	0.806	0.646	1.3989e-113	macrophage	Lcp1
1.16078e-117	5.86259	0.304	0.146	2.53132e-113	macrophage	Fcgrt
1.38515e-117	43.3827	0.638	0.433	3.02059e-113	macrophage	Jdp2
3.31963e-117	44.8254	0.179	0.409	7.23911e-113	macrophage	Trib2
1.34173e-116	51.7602	0.55	0.364	2.9259e-112	macrophage	Ppt1
1.42446e-116	18.6664	0.429	0.248	3.10633e-112	macrophage	5430435G22Rik
2.09129e-116	18.4981	0.406	0.222	4.56047e-112	macrophage	Tubb6
2.31811e-116	7.13951	0.394	0.215	5.0551e-112	macrophage	Kcnj2
2.96653e-116	18.8509	0.36	0.189	6.46911e-112	macrophage	Neurl1b
3.04049e-116	5.10515	0.454	0.267	6.63039e-112	macrophage	Eif4ebp1
3.43107e-116	154.202	0.778	0.633	7.48213e-112	macrophage	Atf3
3.93395e-116	13.5925	0.345	0.178	8.57877e-112	macrophage	Hmox1
9.49313e-116	10.1737	0.328	0.166	2.07017e-111	macrophage	Parvg
1.12815e-115	9.76395	0.434	0.236	2.46016e-111	macrophage	Dhrs9
1.61395e-115	28.9522	0.606	0.436	3.51954e-111	macrophage	Clmp
2.78636e-115	5.71869	0.502	0.306	6.07621e-111	macrophage	Dfna5
6.08055e-115	42.0213	0.634	0.467	1.32599e-110	macrophage	Sdcbp
3.48979e-114	7.32505	0.507	0.322	7.61018e-110	macrophage	Cln3
4.92088e-114	41.4156	0.542	0.352	1.0731e-109	macrophage	Cd84
6.10965e-114	51.0383	0.684	0.511	1.33233e-109	macrophage	Mapkapk3
1.12844e-113	9.95274	0.436	0.245	2.46079e-109	macrophage	Adam8
1.92335e-113	5.30815	0.341	0.17	4.19426e-109	macrophage	Cd14
1.93303e-113	8.58151	0.348	0.181	4.21537e-109	macrophage	P2ry2
3.68515e-113	200.636	0.814	0.708	8.03621e-109	macrophage	Dock4
5.01957e-113	16.9623	0.459	0.287	1.09462e-108	macrophage	Apba1
6.5157e-112	18.7146	0.524	0.349	1.42088e-107	macrophage	Mfsd12
6.69422e-112	21.7423	0.59	0.409	1.45981e-107	macrophage	Pgd
6.73817e-112	1.22694	0.278	0.125	1.46939e-107	macrophage	Clec4e
1.68553e-111	83.7781	0.692	0.568	3.67564e-107	macrophage	Adipor2
6.42611e-111	36.1693	0.578	0.403	1.40134e-106	macrophage	Agpat9
2.19067e-110	24.6263	0.357	0.196	4.7772e-106	macrophage	Rnf217
2.65709e-110	19.2315	0.525	0.352	5.79433e-106	macrophage	Naaa
4.06065e-110	5.87315	0.842	0.702	8.85506e-106	macrophage	Cdh23
6.79775e-110	29.5398	0.455	0.29	1.48238e-105	macrophage	Sort1
8.25181e-110	11.6434	0.663	0.493	1.79947e-105	macrophage	Rcbtb2
8.3742e-110	4.40379	0.551	0.36	1.82616e-105	macrophage	Fat3
1.22997e-109	252.574	0.845	0.714	2.68219e-105	macrophage	Litaf
1.58225e-109	51.7499	0.475	0.313	3.45041e-105	macrophage	Cln8
3.00801e-109	94.3014	0.767	0.629	6.55957e-105	macrophage	Ubtd1
3.60862e-109	191.499	0.81	0.692	7.86931e-105	macrophage	Tmem189
8.56505e-109	9.91841	0.399	0.224	1.86778e-104	macrophage	Tnfrsf14
1.83788e-108	27.5129	0.557	0.389	4.00786e-104	macrophage	1110034G24Rik
2.02962e-108	197.751	0.824	0.63	4.426e-104	macrophage	Pik3ap1
3.84916e-108	5.40199	0.267	0.122	8.39386e-104	macrophage	Vil1
6.25223e-108	34.1107	0.564	0.385	1.36342e-103	macrophage	Grn
3.99363e-107	1.0932	0.452	0.276	8.70891e-103	macrophage	Cdc42bpb
4.44894e-107	30.4776	0.516	0.343	9.7018e-103	macrophage	Hmgcl
1.83211e-106	24.2198	0.508	0.322	3.99528e-102	macrophage	Metrnl
2.23394e-106	16.5217	0.258	0.117	4.87155e-102	macrophage	Iglon5
2.43653e-106	201.896	0.812	0.702	5.31335e-102	macrophage	3110082I17Rik
5.34697e-106	4.44322	0.511	0.327	1.16601e-101	macrophage	Cd80
6.08627e-106	174.668	0.549	0.687	1.32723e-101	macrophage	Ets1
1.37573e-105	14.4976	0.377	0.203	3.00006e-101	macrophage	Atp1a3
1.56031e-105	52.5134	0.708	0.551	3.40256e-101	macrophage	Cflar
2.19246e-105	41.4679	0.585	0.416	4.7811e-101	macrophage	Rnh1
1.25689e-104	47.6943	0.721	0.582	2.7409e-100	macrophage	Hpcal1
2.19648e-104	31.8412	0.448	0.282	4.78987e-100	macrophage	Ccdc88a
3.24949e-104	2.98596	0.372	0.21	7.08616e-100	macrophage	Slc16a7
3.4068e-104	46.8764	0.572	0.398	7.42922e-100	macrophage	Furin
3.42088e-104	80.3335	0.653	0.488	7.45992e-100	macrophage	Nfil3
3.7884e-104	5.84648	0.311	0.157	8.26136e-100	macrophage	Ppp1r42
1.00472e-103	8.75824	0.36	0.2	2.19099e-99	macrophage	Rufy4
1.30488e-103	13.0152	0.26	0.122	2.84556e-99	macrophage	Kbtbd12
2.04436e-103	23.7301	0.423	0.262	4.45813e-99	macrophage	Pla2g15
2.62134e-103	66.423	0.624	0.454	5.71636e-99	macrophage	Ubap1
3.70778e-103	6.78681	0.295	0.148	8.08557e-99	macrophage	Mgst1
4.19714e-103	25.5714	0.494	0.312	9.15269e-99	macrophage	Sh2b2
6.37108e-103	21.474	0.259	0.121	1.38934e-98	macrophage	Ccdc80
1.46238e-102	20.2986	0.461	0.305	3.18902e-98	macrophage	Anln
1.6722e-102	31.3288	0.602	0.429	3.64656e-98	macrophage	Atp6v0c
1.68535e-102	20.3254	0.575	0.4	3.67523e-98	macrophage	Pik3cb
4.50111e-102	131.387	0.385	0.222	9.81557e-98	macrophage	Dock7
8.82435e-102	167.427	0.814	0.678	1.92433e-97	macrophage	Med12l
1.69394e-101	3.05607	0.414	0.245	3.69397e-97	macrophage	Adtrp
4.47976e-101	15.9714	0.715	0.561	9.76902e-97	macrophage	Reep3
6.13313e-101	1.56989	0.385	0.23	1.33745e-96	macrophage	Mapre3
6.37784e-101	17.3942	0.478	0.305	1.39082e-96	macrophage	Nav1
7.96542e-101	44.8254	0.751	0.607	1.73702e-96	macrophage	Myo9b
8.33367e-101	38.0544	0.503	0.331	1.81732e-96	macrophage	Soga1
1.16574e-100	5.87928	0.33	0.174	2.54214e-96	macrophage	Card9
1.42131e-100	16.979	0.337	0.179	3.09944e-96	macrophage	Srxn1
1.95623e-100	44.8254	0.715	0.567	4.26595e-96	macrophage	Cpt1a
2.09846e-100	45.293	0.691	0.556	4.57611e-96	macrophage	Ptpn12
3.34056e-100	2.69661	0.35	0.19	7.28476e-96	macrophage	Cracr2b
3.7614e-100	38.1226	0.577	0.407	8.20249e-96	macrophage	Cebpb
4.02283e-100	79.4486	0.748	0.615	8.77258e-96	macrophage	Rgl1
7.26495e-100	26.073	0.53	0.335	1.58427e-95	macrophage	Themis2
8.99403e-100	1.75265	0.297	0.144	1.96133e-95	macrophage	Trem3
1.08799e-99	42.582	0.452	0.293	2.37259e-95	macrophage	Dusp3
2.66345e-99	14.7083	0.579	0.41	5.80818e-95	macrophage	Rnf169
1.24242e-98	14.9853	0.316	0.165	2.70934e-94	macrophage	Tlr7
1.39535e-98	2.68401	0.37	0.211	3.04284e-94	macrophage	Syngr1
3.88322e-98	22.5712	0.411	0.247	8.46814e-94	macrophage	Basp1
6.8847e-98	7.24544	0.328	0.174	1.50135e-93	macrophage	B430306N03Rik
9.32186e-98	35.6933	0.587	0.433	2.03282e-93	macrophage	Tmed10
2.41034e-97	18.7044	0.473	0.302	5.25622e-93	macrophage	Apobr
3.53892e-97	59.2087	0.637	0.473	7.71732e-93	macrophage	Pdcd1lg2
7.02945e-97	21.7346	0.537	0.387	1.53291e-92	macrophage	Pepd
8.28408e-97	2.49061	0.311	0.159	1.80651e-92	macrophage	Entpd3
9.39571e-97	37.1511	0.538	0.371	2.04892e-92	macrophage	Msrb1
3.32539e-96	38.7547	0.53	0.366	7.25168e-92	macrophage	Ap5s1
8.56934e-96	33.729	0.665	0.497	1.86872e-91	macrophage	Tuba1c
1.5772e-95	13.0862	0.497	0.333	3.43939e-91	macrophage	Dusp13
1.96807e-95	5.68584	0.286	0.143	4.29177e-91	macrophage	Ahrr
2.34651e-95	13.0875	0.371	0.215	5.11704e-91	macrophage	Cela1
7.50312e-95	65.6499	0.736	0.601	1.6362e-90	macrophage	Larp4b
8.77539e-95	15.9712	0.522	0.344	1.91365e-90	macrophage	Myom1
1.10564e-94	29.1631	0.436	0.27	2.41106e-90	macrophage	Hlx
2.02406e-94	9.97133	0.388	0.229	4.41388e-90	macrophage	Rnpep
2.03178e-94	27.0345	0.504	0.355	4.43071e-90	macrophage	Gm20425
3.08708e-94	4.5003	0.371	0.21	6.732e-90	macrophage	Ier3
4.80833e-94	10.5561	0.486	0.323	1.04855e-89	macrophage	Amdhd2
5.74035e-94	47.7096	0.644	0.487	1.2518e-89	macrophage	Specc1
5.97279e-94	46.2668	0.693	0.533	1.30249e-89	macrophage	Adssl1
1.66032e-93	30.0586	0.364	0.218	3.62066e-89	macrophage	Clmn
1.69438e-93	30.2969	0.45	0.276	3.69494e-89	macrophage	Arg2
1.8768e-93	8.68458	0.473	0.301	4.09274e-89	macrophage	Jag1
2.18412e-93	168.897	0.815	0.672	4.76291e-89	macrophage	Tg
3.10937e-93	54.9279	0.804	0.631	6.78061e-89	macrophage	Ptprj
5.10526e-93	73.3449	0.619	0.464	1.1133e-88	macrophage	Ppcdc
6.32519e-93	31.7612	0.547	0.364	1.37933e-88	macrophage	Tlr6
3.72053e-92	0.64342	0.336	0.187	8.11336e-88	macrophage	Gpr55
9.87981e-92	29.0255	0.54	0.376	2.15449e-87	macrophage	Dhx34
1.77128e-91	52.04	0.685	0.5	3.86263e-87	macrophage	Plekhg3
3.05089e-91	2.99638	0.323	0.178	6.65308e-87	macrophage	Clcn7
5.0273e-91	147.257	0.733	0.597	1.0963e-86	macrophage	Man1c1
6.29012e-91	43.6522	0.669	0.505	1.37169e-86	macrophage	Prkcd
9.52831e-91	37.0959	0.473	0.3	2.07784e-86	macrophage	Sepn1
1.56925e-90	17.3707	0.364	0.208	3.42206e-86	macrophage	Ttc39a
1.93941e-90	18.8569	0.343	0.193	4.22928e-86	macrophage	Ugt1a6a
2.33522e-90	161.613	0.828	0.691	5.09241e-86	macrophage	Entpd1
4.95928e-90	79.4496	0.692	0.511	1.08147e-85	macrophage	Ankrd33b
8.04332e-90	12.6626	0.509	0.33	1.75401e-85	macrophage	Slc16a3
1.39406e-89	101.082	0.717	0.561	3.04004e-85	macrophage	Ston2
1.46935e-89	15.9615	0.289	0.148	3.20421e-85	macrophage	1810011H11Rik
1.86519e-89	8.75449	0.622	0.496	4.06742e-85	macrophage	St7
2.36715e-89	158.796	0.714	0.59	5.16205e-85	macrophage	Ralgds
3.05623e-89	26.9885	0.485	0.333	6.66471e-85	macrophage	Ltc4s
7.07464e-89	99.4645	0.412	0.256	1.54277e-84	macrophage	Tmem51
9.76135e-89	9.42929	0.402	0.253	2.12866e-84	macrophage	Agmo
9.78536e-89	8.74593	0.402	0.253	2.13389e-84	macrophage	F11r
1.50549e-88	15.9715	0.559	0.405	3.28302e-84	macrophage	Cyfip1
2.57099e-88	20.9296	0.421	0.267	5.60655e-84	macrophage	Atp13a2
4.61026e-88	56.3281	0.561	0.396	1.00536e-83	macrophage	Rilpl2
6.60673e-88	20.7369	0.501	0.334	1.44073e-83	macrophage	Sema6b
7.16935e-88	116.777	0.278	0.463	1.56342e-83	macrophage	Jakmip1
9.51739e-88	36.166	0.527	0.366	2.07546e-83	macrophage	Slc18a1
9.93279e-88	33.2838	0.517	0.378	2.16604e-83	macrophage	Mink1
1.56585e-87	3	0.378	0.23	3.41466e-83	macrophage	Slc36a1
1.65895e-87	53.4422	0.156	0.338	3.61768e-83	macrophage	Cnn3
1.68713e-87	27.9254	0.434	0.278	3.67912e-83	macrophage	Prrt1
2.22726e-87	7.31536	0.529	0.391	4.85698e-83	macrophage	Lphn2
3.06966e-87	15.9716	0.554	0.398	6.69401e-83	macrophage	Cd101
6.77521e-87	34.7209	0.574	0.435	1.47747e-82	macrophage	Tmem154
7.20122e-87	2.66641	0.268	0.131	1.57037e-82	macrophage	Cxcr2
1.18658e-86	4.3692	0.272	0.138	2.58758e-82	macrophage	Nrg1
1.78631e-86	27.9557	0.527	0.362	3.89541e-82	macrophage	Tm6sf1
1.9324e-86	99.1762	0.697	0.549	4.21399e-82	macrophage	Arhgap23
2.20546e-86	24.6277	0.525	0.687	4.80945e-82	macrophage	Msi2
2.35131e-86	111.188	0.833	0.721	5.1275e-82	macrophage	Iqgap1
2.37675e-86	32.9981	0.161	0.339	5.18298e-82	macrophage	Ccr7
2.92616e-86	106.715	0.74	0.564	6.38107e-82	macrophage	Arhgap25
6.64868e-86	140.032	0.807	0.678	1.44988e-81	macrophage	Pfkfb3
7.83017e-86	7.81327	0.337	0.191	1.70753e-81	macrophage	Rhoc
9.13169e-86	274.214	0.322	0.508	1.99135e-81	macrophage	Akap2
1.20973e-85	154.47	0.695	0.561	2.63807e-81	macrophage	Abca1
2.26846e-85	75.0856	0.685	0.54	4.94684e-81	macrophage	Btbd19
2.55652e-85	179.439	0.401	0.559	5.57501e-81	macrophage	Aff3
2.63366e-85	10.2468	0.31	0.17	5.74322e-81	macrophage	Marveld2
3.24975e-85	47.2503	0.609	0.451	7.08673e-81	macrophage	Slc8b1
3.72876e-85	23.4875	0.563	0.403	8.13131e-81	macrophage	Arhgap19
4.15782e-85	10.2021	0.67	0.535	9.06696e-81	macrophage	Rps6ka2
4.15969e-85	22.1921	0.58	0.421	9.07104e-81	macrophage	Tnfrsf8
5.45516e-85	47.5091	0.434	0.294	1.18961e-80	macrophage	Luzp1
6.07758e-85	15.9715	0.514	0.35	1.32534e-80	macrophage	Abhd5
6.44463e-85	1.7931	0.424	0.279	1.40538e-80	macrophage	Ttyh2
7.09016e-85	26.1744	0.332	0.19	1.54615e-80	macrophage	Ctu1
1.38658e-84	116.371	0.375	0.55	3.02372e-80	macrophage	Cobll1
2.11035e-84	18.1269	0.491	0.337	4.60203e-80	macrophage	Trdmt1
2.5156e-84	13.0762	0.293	0.155	5.48578e-80	macrophage	Efcc1
4.60855e-84	166.012	0.74	0.599	1.00499e-79	macrophage	Susd1
4.61419e-84	59.2481	0.627	0.492	1.00622e-79	macrophage	Txn1
6.15337e-84	106.384	0.724	0.583	1.34187e-79	macrophage	Cotl1
7.34676e-84	14.0307	0.41	0.262	1.60211e-79	macrophage	Echs1
9.03116e-84	2.98721	0.278	0.144	1.96943e-79	macrophage	Stac
1.34315e-83	81.8666	0.764	0.642	2.92901e-79	macrophage	Slc43a2
1.85858e-83	66.4512	0.679	0.547	4.053e-79	macrophage	Pfkfb4
2.0931e-83	47.2456	0.65	0.516	4.56443e-79	macrophage	Tgfbr1
2.62847e-83	37.6216	0.547	0.405	5.7319e-79	macrophage	Zfp704
2.8819e-83	57.2964	0.589	0.407	6.28456e-79	macrophage	Col4a2
6.86249e-83	27.5111	0.529	0.376	1.4965e-78	macrophage	Cd274
1.29987e-82	168.897	0.858	0.753	2.83462e-78	macrophage	Runx1
2.26422e-82	20.4762	0.495	0.354	4.93758e-78	macrophage	Ankrd55
2.79268e-82	45.7863	0.6	0.451	6.08999e-78	macrophage	Art3
3.21031e-82	25.9399	0.468	0.314	7.00073e-78	macrophage	Rnasel
4.41403e-82	31.8386	0.524	0.369	9.62569e-78	macrophage	Creg1
5.28725e-82	128.5	0.743	0.625	1.15299e-77	macrophage	Slx4ip
6.21649e-82	30.3406	0.523	0.365	1.35563e-77	macrophage	Tctex1d4
7.52859e-82	95.3293	0.225	0.413	1.64176e-77	macrophage	Gm28053
8.36682e-82	12.265	0.3	0.167	1.82455e-77	macrophage	Plcb2
8.94387e-82	21.7423	0.227	0.41	1.95039e-77	macrophage	Ptpn14
9.80925e-82	17.4499	0.364	0.217	2.1391e-77	macrophage	Emilin1
1.09605e-81	33.2806	0.543	0.395	2.39015e-77	macrophage	Pts
1.15954e-81	24.5576	0.369	0.214	2.52861e-77	macrophage	Musk
1.28786e-81	131.387	0.707	0.612	2.80844e-77	macrophage	Tmcc3
1.49254e-81	37.6118	0.55	0.4	3.25478e-77	macrophage	Trim25
1.92217e-81	46.2681	0.573	0.432	4.19168e-77	macrophage	Riok3
2.33646e-81	31.9821	0.339	0.192	5.09511e-77	macrophage	Tmem205
2.55995e-81	61.7656	0.552	0.4	5.58247e-77	macrophage	Zfand2a
3.67365e-81	37.612	0.517	0.374	8.01114e-77	macrophage	Tacc2
4.36508e-81	127.032	0.779	0.681	9.51892e-77	macrophage	Nsmce2
7.66381e-81	140.894	0.345	0.512	1.67125e-76	macrophage	Satb1
9.22787e-81	26.8708	0.375	0.23	2.01232e-76	macrophage	Ptger2
1.91199e-80	44.5716	0.548	0.381	4.16947e-76	macrophage	Ogfrl1
2.0543e-80	77.4622	0.6	0.448	4.47981e-76	macrophage	Mvd
2.48295e-80	8.95626	0.416	0.256	5.41456e-76	macrophage	Spatc1
2.56698e-80	10.7464	0.297	0.159	5.59782e-76	macrophage	Ltbr
3.33595e-80	182.104	0.548	0.407	7.2747e-76	macrophage	Nars2
3.51474e-80	215.501	0.36	0.531	7.66458e-76	macrophage	Ppp1r16b
5.38452e-80	28.9558	0.203	0.378	1.1742e-75	macrophage	Dpp4
7.74862e-80	31.26	0.479	0.329	1.68974e-75	macrophage	Wsb2
8.1858e-80	79.0811	0.654	0.512	1.78508e-75	macrophage	Dcakd
5.79411e-79	10.1806	0.275	0.147	1.26352e-74	macrophage	Hfe
9.64754e-79	42.0535	0.678	0.525	2.10384e-74	macrophage	Il17ra
1.5978e-78	11.4449	0.262	0.133	3.48433e-74	macrophage	Gp49a
1.76935e-78	15.7021	0.346	0.204	3.85841e-74	macrophage	Id1
2.11694e-78	398.286	0.411	0.575	4.61642e-74	macrophage	Palm2Akap2
2.34058e-78	78.0074	0.784	0.658	5.10411e-74	macrophage	Pip5k1c
2.55128e-78	18.1552	0.475	0.313	5.56359e-74	macrophage	Osm
5.03029e-78	37.244	0.348	0.205	1.09696e-73	macrophage	Mfap3l
1.09853e-77	18.8569	0.5	0.354	2.39556e-73	macrophage	Taldo1
1.14848e-77	60.5096	0.617	0.473	2.5045e-73	macrophage	6430548M08Rik
1.45337e-77	28.2036	0.439	0.288	3.16937e-73	macrophage	Ccdc86
1.50565e-77	11.9882	0.276	0.146	3.28337e-73	macrophage	Htr7
1.53123e-77	47.7108	0.686	0.551	3.33915e-73	macrophage	Xrcc4
4.7021e-77	131.83	0.638	0.506	1.02539e-72	macrophage	Agpat4
6.54222e-77	7.31577	0.262	0.138	1.42666e-72	macrophage	Tns4
9.62831e-77	7.30574	0.283	0.153	2.09965e-72	macrophage	Kcng2
1.10364e-76	109.747	0.788	0.663	2.4067e-72	macrophage	Hip1
1.11508e-76	60.6689	0.709	0.584	2.43165e-72	macrophage	C2cd3
1.15052e-76	28.5038	0.647	0.524	2.50894e-72	macrophage	Fbxl5
1.44521e-76	62.1244	0.487	0.341	3.15156e-72	macrophage	1110051M20Rik
1.85774e-76	59.6686	0.647	0.476	4.05117e-72	macrophage	Nod2
1.93805e-76	67.8379	0.666	0.511	4.22631e-72	macrophage	1110007C09Rik
2.11819e-76	17.3583	0.434	0.297	4.61914e-72	macrophage	Gyg
4.96883e-76	21.7455	0.528	0.378	1.08355e-71	macrophage	Chid1
9.00201e-76	15.8307	0.39	0.241	1.96307e-71	macrophage	Stab1
1.34071e-75	53.4813	0.605	0.463	2.92368e-71	macrophage	Blm
2.74427e-75	13.5102	0.493	0.347	5.98444e-71	macrophage	Mtl5
7.23787e-75	141.476	0.799	0.695	1.57836e-70	macrophage	Ldlrad4
1.95974e-74	52.0389	0.497	0.336	4.27359e-70	macrophage	Cd86
2.38182e-74	18.6397	0.368	0.231	5.19404e-70	macrophage	Blvra
2.38533e-74	101.09	0.71	0.569	5.20168e-70	macrophage	Plekho2
3.87886e-74	8.75806	0.561	0.423	8.45863e-70	macrophage	Ralb
8.70813e-74	4.43356	0.544	0.393	1.89898e-69	macrophage	Atox1
1.00863e-73	38.5512	0.558	0.409	2.19953e-69	macrophage	Vopp1
1.8594e-73	31.8412	0.673	0.543	4.0548e-69	macrophage	Mapk6
2.00229e-73	7.95347	0.485	0.331	4.36638e-69	macrophage	Ube2l3
2.78323e-73	43.2226	0.535	0.39	6.06939e-69	macrophage	Ncoa4
3.79134e-73	30.3985	0.639	0.501	8.26777e-69	macrophage	Anxa11
3.79784e-73	15.891	0.393	0.248	8.28194e-69	macrophage	Gstm1
4.22288e-73	90.8052	0.703	0.573	9.20883e-69	macrophage	Spen
1.19184e-72	138.531	0.571	0.707	2.59905e-68	macrophage	Sorl1
1.29433e-72	67.8385	0.835	0.728	2.82254e-68	macrophage	Itpr2
1.51962e-72	18.9262	0.39	0.249	3.31384e-68	macrophage	Ccr5
2.11083e-72	51.8638	0.543	0.404	4.60309e-68	macrophage	Rac1
2.60785e-72	5.87267	0.692	0.535	5.68695e-68	macrophage	Armc9
2.94837e-72	30.3251	0.63	0.449	6.4295e-68	macrophage	Wdfy4
4.93908e-72	2.98728	0.429	0.278	1.07706e-67	macrophage	Alas1
8.48776e-72	20.4827	0.682	0.559	1.85093e-67	macrophage	Dtx4
8.54357e-72	28.8179	0.604	0.465	1.8631e-67	macrophage	Dnajc5
1.02692e-71	11.4637	0.571	0.425	2.2394e-67	macrophage	Arsb
1.16133e-71	10.1879	0.409	0.258	2.53252e-67	macrophage	Hk3
1.27894e-71	73.6757	0.34	0.206	2.78898e-67	macrophage	Tmem178b
1.4971e-71	68.1677	0.634	0.519	3.26474e-67	macrophage	Galnt7
2.33062e-71	6.32461	0.593	0.469	5.08238e-67	macrophage	Elmo2
4.59322e-71	90.9917	0.762	0.65	1.00164e-66	macrophage	Lrrc8d
5.47022e-71	43.3827	0.616	0.464	1.19289e-66	macrophage	Slc35f5
9.15415e-71	14.1764	0.572	0.434	1.99624e-66	macrophage	Adipor1
9.32095e-71	150.142	0.482	0.352	2.03262e-66	macrophage	Atxn10
1.72474e-70	6.0461	0.3	0.169	3.76114e-66	macrophage	Htra3
2.11879e-70	28.3515	0.521	0.376	4.62045e-66	macrophage	Cuedc2
2.17498e-70	134.273	0.462	0.616	4.74299e-66	macrophage	Sptbn1
3.15254e-70	32.2312	0.363	0.218	6.87474e-66	macrophage	Zfp503
3.9281e-70	47.7108	0.261	0.427	8.56602e-66	macrophage	Tgfbr3
4.09517e-70	34.647	0.56	0.418	8.93035e-66	macrophage	Dgat2
6.59277e-70	10.2008	0.314	0.477	1.43769e-65	macrophage	Sntb1
6.94829e-70	30.4081	0.405	0.268	1.51521e-65	macrophage	Flt1
9.80459e-70	49.1535	0.486	0.346	2.13809e-65	macrophage	Pde10a
1.5186e-69	98.2051	0.726	0.635	3.3116e-65	macrophage	Cradd
1.52216e-69	5.84653	0.429	0.275	3.31937e-65	macrophage	Irg1
2.07344e-69	5.87267	0.638	0.51	4.52155e-65	macrophage	Rffl
2.11239e-69	11.39	0.46	0.319	4.6065e-65	macrophage	Coa4
2.22853e-69	73.6092	0.712	0.589	4.85975e-65	macrophage	Acsl1
2.99006e-69	31.8049	0.317	0.187	6.52041e-65	macrophage	Plod1
3.9159e-69	100.497	0.747	0.624	8.5394e-65	macrophage	Ccdc12
4.49073e-69	24.6053	0.692	0.56	9.79294e-65	macrophage	Snx18
6.32383e-69	7.31536	0.61	0.47	1.37904e-64	macrophage	Dirc2
6.94847e-69	17.4405	0.446	0.308	1.51525e-64	macrophage	Mtm1
7.4583e-69	66.4659	0.608	0.493	1.62643e-64	macrophage	Arhgap39
8.8026e-69	63.5769	0.673	0.552	1.91958e-64	macrophage	Maff
9.88536e-69	144.37	0.811	0.682	2.1557e-64	macrophage	Irak2
1.4933e-68	7.77286	0.477	0.337	3.25643e-64	macrophage	Adamtsl4
2.32928e-68	5.86298	0.445	0.311	5.07946e-64	macrophage	Slc41a2
2.4881e-68	15.9293	0.395	0.257	5.4258e-64	macrophage	Dhx58
2.56731e-68	6.98994	0.277	0.157	5.59854e-64	macrophage	Mthfsl
3.27057e-68	67.3937	0.406	0.265	7.13213e-64	macrophage	Rusc2
4.12702e-68	23.1802	0.611	0.481	8.99978e-64	macrophage	Sntb2
4.13848e-68	126.016	0.668	0.544	9.02478e-64	macrophage	Ppard
7.52739e-68	47.1869	0.568	0.438	1.6415e-63	macrophage	Vim
8.48427e-68	39.045	0.622	0.499	1.85017e-63	macrophage	Ywhag
8.5467e-68	3.20999	0.447	0.308	1.86378e-63	macrophage	Zfand4
1.20666e-67	27.3075	0.421	0.287	2.63136e-63	macrophage	P2ry14
1.2433e-67	11.1804	0.386	0.257	2.71126e-63	macrophage	Comt
1.28237e-67	18.882	0.541	0.404	2.79647e-63	macrophage	Ccrn4l
1.36612e-67	67.7051	0.689	0.553	2.97909e-63	macrophage	Pnpla7
1.39996e-67	4.267	0.452	0.312	3.05289e-63	macrophage	Apobec1
1.43141e-67	7.49864	0.464	0.344	3.12148e-63	macrophage	D8Ertd82e
1.79813e-67	43.1876	0.468	0.332	3.92119e-63	macrophage	Stom
1.89508e-67	161.684	0.755	0.671	4.13261e-63	macrophage	Pnkd
2.30502e-67	8.74388	0.385	0.258	5.02657e-63	macrophage	Cdh1
3.29608e-67	71.772	0.595	0.458	7.18777e-63	macrophage	Ehbp1l1
3.58686e-67	157.359	0.799	0.683	7.82186e-63	macrophage	Rin3
3.71005e-67	25.071	0.702	0.574	8.0905e-63	macrophage	Mapkapk2
4.58539e-67	27.4774	0.683	0.55	9.99937e-63	macrophage	Slc23a2
4.76912e-67	52.0085	0.615	0.481	1.04e-62	macrophage	Ppp1r15b
4.91263e-67	26.0691	0.568	0.436	1.0713e-62	macrophage	Lgmn
8.68442e-67	24.1847	0.397	0.26	1.89381e-62	macrophage	Glrx
8.93817e-67	114.003	0.745	0.639	1.94915e-62	macrophage	Trib1
1.02225e-66	155.774	0.755	0.651	2.22922e-62	macrophage	Rreb1
1.33133e-66	20.2519	0.409	0.272	2.90323e-62	macrophage	Mllt4
1.47942e-66	23.1583	0.404	0.265	3.22617e-62	macrophage	Ltbp2
1.56024e-66	21.1932	0.375	0.24	3.40242e-62	macrophage	Mocos
2.65708e-66	225.136	0.678	0.558	5.7943e-62	macrophage	Asph
3.22241e-66	30.3985	0.469	0.331	7.02712e-62	macrophage	Acer3
4.11754e-66	15.6936	0.411	0.278	8.97913e-62	macrophage	Itga5
4.18744e-66	19.2904	0.494	0.345	9.13154e-62	macrophage	Pik3cg
5.43886e-66	10.7261	0.316	0.189	1.18605e-61	macrophage	Map6
6.09197e-66	57.8084	0.668	0.532	1.32848e-61	macrophage	Vav3
6.74571e-66	24.7865	0.337	0.208	1.47104e-61	macrophage	Cstb
9.39172e-66	30.3985	0.597	0.454	2.04805e-61	macrophage	Ifngr2
1.13887e-65	3.8924	0.296	0.172	2.48354e-61	macrophage	Fstl1
1.41769e-65	30.3634	0.457	0.322	3.09156e-61	macrophage	Gdf15
1.54959e-65	14.9803	0.501	0.364	3.37919e-61	macrophage	Atp6v1b2
1.57872e-65	8.78442	0.583	0.445	3.44271e-61	macrophage	Myo5a
2.28942e-65	36.1606	0.39	0.251	4.99254e-61	macrophage	Thbd
2.29507e-65	60.2606	0.578	0.442	5.00486e-61	macrophage	Fam63a
3.57409e-65	24.2018	0.322	0.47	7.79403e-61	macrophage	Tnik
3.77784e-65	51.449	0.638	0.498	8.23833e-61	macrophage	4632428N05Rik
3.79778e-65	4.41516	0.261	0.144	8.28183e-61	macrophage	Fut7
4.7949e-65	36.1693	0.285	0.434	1.04562e-60	macrophage	Itk
4.98077e-65	109.542	0.719	0.613	1.08616e-60	macrophage	Stk40
5.71694e-65	15.9618	0.252	0.137	1.24669e-60	macrophage	Fam20c
6.22341e-65	24.5544	0.523	0.384	1.35714e-60	macrophage	Phospho1
6.29679e-65	167.454	0.62	0.53	1.37314e-60	macrophage	Mob3b
7.56798e-65	25.9886	0.51	0.375	1.65035e-60	macrophage	Nutf2
7.91367e-65	47.1524	0.217	0.386	1.72573e-60	macrophage	Kbtbd11
9.08048e-65	2.01016	0.342	0.208	1.98018e-60	macrophage	Trim30b
1.29319e-64	24.6277	0.583	0.454	2.82006e-60	macrophage	Galns
1.62313e-64	45.2774	0.418	0.58	3.53957e-60	macrophage	Setbp1
1.91627e-64	31.8334	0.418	0.287	4.17881e-60	macrophage	Csnk1e
1.9467e-64	37.6118	0.539	0.396	4.24517e-60	macrophage	Ifnar2
2.37164e-64	77.9964	0.797	0.691	5.17183e-60	macrophage	Notch2
2.69074e-64	18.5114	0.545	0.397	5.8677e-60	macrophage	Dclre1c
2.76379e-64	59.1819	0.682	0.537	6.02699e-60	macrophage	Aim2
2.78502e-64	49.1495	0.703	0.575	6.0733e-60	macrophage	B4galt5
3.21888e-64	56.3669	0.534	0.412	7.01942e-60	macrophage	Tbc1d9b
3.26104e-64	18.2376	0.444	0.297	7.11136e-60	macrophage	6430531B16Rik
4.3059e-64	13.5507	0.391	0.254	9.38988e-60	macrophage	Vcan
5.84813e-64	124.147	0.655	0.53	1.2753e-59	macrophage	Zfhx3
6.98036e-64	21.1029	0.352	0.23	1.52221e-59	macrophage	Zfp128
1.47128e-63	58.456	0.375	0.238	3.20843e-59	macrophage	E230008N13Rik
1.76124e-63	53.4766	0.659	0.521	3.84074e-59	macrophage	Rhog
2.27719e-63	9.62328	0.341	0.214	4.96587e-59	macrophage	Gm5444
2.96577e-63	95.6521	0.682	0.542	6.46745e-59	macrophage	Fosl2
3.20302e-63	79.4412	0.741	0.595	6.98482e-59	macrophage	Apbb1ip
3.24752e-63	46.2681	0.463	0.351	7.08188e-59	macrophage	Cdc14b
4.19568e-63	16.7004	0.411	0.278	9.14952e-59	macrophage	Ppp1r3b
4.38225e-63	7.89656	0.327	0.201	9.55637e-59	macrophage	Abcg3
6.47984e-63	20.4664	0.47	0.332	1.41306e-58	macrophage	Nfe2
9.22245e-63	36.1989	0.401	0.265	2.01114e-58	macrophage	Scimp
9.23745e-63	11.2916	0.304	0.186	2.01441e-58	macrophage	Kcna3
1.04942e-62	93.7819	0.678	0.561	2.28848e-58	macrophage	Ndel1
1.08024e-62	36.6405	0.608	0.495	2.35567e-58	macrophage	Dram1
1.11992e-62	56.367	0.626	0.51	2.4422e-58	macrophage	Ift122
1.16585e-62	121.127	0.771	0.653	2.54236e-58	macrophage	Vmp1
2.04332e-62	13.0861	0.491	0.356	4.45586e-58	macrophage	Hnrnpll
2.75911e-62	25.9516	0.592	0.461	6.01679e-58	macrophage	Map3k8
2.76068e-62	68.1544	0.696	0.583	6.02021e-58	macrophage	Atp6v1a
3.55465e-62	23.2095	0.444	0.307	7.75163e-58	macrophage	Lgals9
3.71416e-62	18.8569	0.525	0.391	8.09947e-58	macrophage	Mettl9
4.8016e-62	66.4659	0.722	0.596	1.04708e-57	macrophage	Mgat4a
6.64508e-62	115.514	0.762	0.664	1.44909e-57	macrophage	Sdccag8
7.88163e-62	44.6867	0.66	0.515	1.71875e-57	macrophage	Csf2ra
8.99364e-62	41.4973	0.719	0.605	1.96124e-57	macrophage	Zmynd8
1.05597e-61	88.1289	0.736	0.627	2.30275e-57	macrophage	Zfp608
1.16734e-61	60.659	0.56	0.432	2.54563e-57	macrophage	Ampd3
1.24637e-61	27.14	0.525	0.382	2.71796e-57	macrophage	Plaur
1.3549e-61	72.2331	0.556	0.418	2.95463e-57	macrophage	Slc25a12
1.87463e-61	6.96844	0.277	0.162	4.08801e-57	macrophage	Tnfsf13
2.22051e-61	79.4234	0.686	0.554	4.84228e-57	macrophage	Fkbp15
2.2434e-61	74.7778	0.423	0.29	4.89218e-57	macrophage	Rnf11
2.29587e-61	9.18849	0.378	0.245	5.00661e-57	macrophage	S1pr2
2.35855e-61	133.254	0.772	0.68	5.14329e-57	macrophage	Ell
2.62161e-61	46.2717	0.668	0.512	5.71694e-57	macrophage	Fmnl1
2.66038e-61	52.0389	0.265	0.152	5.80148e-57	macrophage	Fam198b
3.19572e-61	1.74062	0.38	0.261	6.96891e-57	macrophage	Dlgap5
3.59804e-61	116.96	0.773	0.655	7.84625e-57	macrophage	Ezr
5.37382e-61	7.38546	0.579	0.446	1.17187e-56	macrophage	Chchd6
5.92146e-61	31.0161	0.578	0.436	1.29129e-56	macrophage	Yeats4
6.6133e-61	33.2623	0.479	0.344	1.44216e-56	macrophage	Trpv2
1.00375e-60	8.68055	0.296	0.177	2.18888e-56	macrophage	Tusc1
1.0392e-60	11.644	0.576	0.451	2.26618e-56	macrophage	Fam105a
1.09125e-60	2.98728	0.6	0.484	2.3797e-56	macrophage	Abcg1
1.13729e-60	15.9675	0.318	0.196	2.48009e-56	macrophage	Gm3336
1.21238e-60	43.3827	0.588	0.474	2.64384e-56	macrophage	Ipmk
1.43298e-60	33.2788	0.339	0.21	3.1249e-56	macrophage	Fblim1
1.98811e-60	44.8241	0.371	0.515	4.33546e-56	macrophage	Arap2
2.03398e-60	11.2473	0.413	0.281	4.4355e-56	macrophage	Dna2
2.42665e-60	8.75806	0.546	0.417	5.2918e-56	macrophage	Tmco3
2.48433e-60	41.94	0.679	0.565	5.41757e-56	macrophage	Usp32
2.80239e-60	8.75808	0.626	0.509	6.11118e-56	macrophage	Loh12cr1
2.99726e-60	85.2203	0.676	0.56	6.53611e-56	macrophage	Pkm
3.28988e-60	27.583	0.33	0.208	7.17424e-56	macrophage	Pld2
3.59531e-60	112.632	0.717	0.595	7.8403e-56	macrophage	Plxnc1
5.52913e-60	1.54875	0.334	0.209	1.20574e-55	macrophage	Capn3
6.51741e-60	1.62601	0.465	0.341	1.42125e-55	macrophage	Anxa2
6.7668e-60	52.0389	0.679	0.542	1.47564e-55	macrophage	Sla
8.72937e-60	1.6633	0.478	0.342	1.90361e-55	macrophage	P2ry12
9.17085e-60	4.15012	0.435	0.307	1.99989e-55	macrophage	Pqlc3
1.03368e-59	25.8508	0.559	0.434	2.25414e-55	macrophage	Scamp2
1.14323e-59	43.3778	0.575	0.43	2.49305e-55	macrophage	Vav1
1.48772e-59	29.2744	0.428	0.292	3.24426e-55	macrophage	Tnf
1.50166e-59	166.01	0.832	0.729	3.27467e-55	macrophage	Baz2b
1.90542e-59	20.679	0.416	0.299	4.15516e-55	macrophage	Spns1
2.42714e-59	2.98862	0.422	0.286	5.29287e-55	macrophage	Bco2
3.11556e-59	8.36444	0.292	0.175	6.79411e-55	macrophage	Nupr1l
4.84675e-59	49.1273	0.369	0.516	1.05693e-54	macrophage	Stat4
5.23846e-59	108.33	0.747	0.641	1.14235e-54	macrophage	Grk5
1.40299e-58	213.585	0.797	0.699	3.0595e-54	macrophage	Gm20431
1.82006e-58	1.54494	0.683	0.563	3.969e-54	macrophage	Mapk14
1.9628e-58	25.9098	0.49	0.361	4.28027e-54	macrophage	Crat
2.52192e-58	36.0506	0.568	0.453	5.49955e-54	macrophage	Tmem184b
2.93877e-58	35.1104	0.464	0.331	6.40857e-54	macrophage	Atp6v1e1
5.96625e-58	34.7259	0.531	0.385	1.30106e-53	macrophage	Fxyd5
6.56656e-58	37.7951	0.637	0.522	1.43197e-53	macrophage	Tnks
7.15735e-58	82.3452	0.73	0.627	1.5608e-53	macrophage	Lmna
7.75857e-58	43.3372	0.576	0.43	1.69191e-53	macrophage	Cyba
1.39981e-57	44.8254	0.649	0.531	3.05257e-53	macrophage	Synj2
1.70033e-57	1.44825	0.303	0.188	3.70791e-53	macrophage	Epm2a
1.75536e-57	27.5136	0.809	0.675	3.82791e-53	macrophage	Prex1
1.86958e-57	23.0873	0.458	0.327	4.077e-53	macrophage	Elac1
2.02334e-57	21.7423	0.58	0.463	4.41229e-53	macrophage	4930402H24Rik
2.16579e-57	108.304	0.33	0.481	4.72294e-53	macrophage	Gramd3
2.37252e-57	109.747	0.788	0.706	5.17375e-53	macrophage	Rbms1
4.80497e-57	37.1215	0.5	0.395	1.04782e-52	macrophage	Bcar3
4.80719e-57	78.0069	0.674	0.558	1.0483e-52	macrophage	Tnrc18
5.03541e-57	19.1099	0.166	0.312	1.09807e-52	macrophage	Cers4
5.05634e-57	209.185	0.824	0.733	1.10264e-52	macrophage	Srgap2
1.00279e-56	58.9471	0.592	0.479	2.18678e-52	macrophage	Fam129b
1.17221e-56	30.4521	0.562	0.424	2.55624e-52	macrophage	Pdlim7
1.19536e-56	12.3441	0.288	0.175	2.60673e-52	macrophage	Slc25a43
1.30939e-56	30.3291	0.571	0.454	2.85538e-52	macrophage	Atp2c1
1.38339e-56	63.9563	0.644	0.523	3.01675e-52	macrophage	Dapp1
1.6101e-56	28.9546	0.389	0.267	3.51114e-52	macrophage	Lmbr1
1.77966e-56	98.2052	0.526	0.407	3.88091e-52	macrophage	Nrp1
2.07136e-56	40.1289	0.338	0.22	4.51701e-52	macrophage	Angptl4
2.12659e-56	88.1061	0.716	0.601	4.63745e-52	macrophage	Msra
2.71135e-56	30.3997	0.634	0.515	5.91265e-52	macrophage	Setd8
3.60731e-56	18.8833	0.62	0.491	7.86645e-52	macrophage	Ucp2
3.8086e-56	37.601	0.484	0.358	8.30542e-52	macrophage	Phactr4
4.37052e-56	81.9054	0.685	0.569	9.53078e-52	macrophage	Nabp1
4.48714e-56	38.3239	0.598	0.477	9.78511e-52	macrophage	Lonrf1
5.76558e-56	76.5288	0.639	0.538	1.2573e-51	macrophage	Sptlc2
6.02253e-56	48.7083	0.579	0.465	1.31333e-51	macrophage	Snrk
8.31981e-56	7.31226	0.304	0.188	1.8143e-51	macrophage	Dchs1
9.48747e-56	83.7777	0.742	0.622	2.06893e-51	macrophage	Tbc1d5
1.04487e-55	90.8046	0.724	0.631	2.27855e-51	macrophage	Bcl2l1
1.19089e-55	36.1692	0.603	0.469	2.59697e-51	macrophage	Ets2
1.31682e-55	62.1041	0.625	0.502	2.87158e-51	macrophage	Arf2
1.328e-55	103.793	0.764	0.676	2.89596e-51	macrophage	Vps13d
1.64467e-55	0.671621	0.557	0.434	3.58654e-51	macrophage	Mvb12b
1.83956e-55	20.2633	0.156	0.294	4.01153e-51	macrophage	Tespa1
3.2963e-55	21.0266	0.372	0.258	7.18823e-51	macrophage	Ctnnd1
3.69449e-55	11.2624	0.233	0.38	8.05657e-51	macrophage	Tspan2
3.95608e-55	28.1437	0.389	0.265	8.62703e-51	macrophage	Tnip3
5.35015e-55	47.118	0.57	0.447	1.16671e-50	macrophage	Gapdh
5.44895e-55	16.3531	0.449	0.316	1.18825e-50	macrophage	Cst3
5.50524e-55	6.84194	0.257	0.151	1.20053e-50	macrophage	Mgst2
5.68132e-55	39.0469	0.484	0.365	1.23893e-50	macrophage	2310022A10Rik
6.6027e-55	105.601	0.761	0.665	1.43985e-50	macrophage	Pxn
7.53933e-55	9.85424	0.592	0.471	1.6441e-50	macrophage	Soat1
8.29629e-55	108.299	0.755	0.666	1.80917e-50	macrophage	Mapre2
9.14367e-55	40.4962	0.572	0.448	1.99396e-50	macrophage	Rnf141
9.21677e-55	27.5131	0.638	0.526	2.0099e-50	macrophage	Skap2
1.25944e-54	52.0365	0.665	0.537	2.74647e-50	macrophage	Glipr2
1.26168e-54	33.2729	0.124	0.259	2.75135e-50	macrophage	Ehd3
1.37285e-54	28.9555	0.504	0.375	2.99377e-50	macrophage	Ywhab
1.45412e-54	96.2777	0.682	0.562	3.17099e-50	macrophage	Prcp
1.54097e-54	5.87294	0.317	0.205	3.36039e-50	macrophage	Tamm41
1.88389e-54	46.6557	0.562	0.433	4.10819e-50	macrophage	Colgalt1
1.91777e-54	13.0867	0.412	0.288	4.18208e-50	macrophage	Slc35e4
2.00355e-54	5.87576	0.511	0.39	4.36915e-50	macrophage	Slc17a5
2.20743e-54	24.6276	0.512	0.396	4.81374e-50	macrophage	Acox1
2.2481e-54	89.5488	0.524	0.401	4.90244e-50	macrophage	Ddi2
2.76288e-54	6.72053	0.268	0.158	6.02502e-50	macrophage	Mpp1
3.33016e-54	67.7239	0.619	0.506	7.26209e-50	macrophage	Snx1
3.74553e-54	0.551456	0.365	0.242	8.16788e-50	macrophage	Fnbp1l
4.2358e-54	2.98859	0.744	0.637	9.23702e-50	macrophage	Coro1c
5.48339e-54	43.373	0.586	0.473	1.19576e-49	macrophage	Smyd1
6.80292e-54	41.9058	0.61	0.49	1.48351e-49	macrophage	Zfyve26
7.12273e-54	0.666111	0.308	0.189	1.55325e-49	macrophage	Pram1
8.29077e-54	30.3985	0.738	0.622	1.80797e-49	macrophage	Ninj2
8.34447e-54	28.955	0.425	0.315	1.81968e-49	macrophage	Dse
1.29749e-53	132.751	0.734	0.626	2.82943e-49	macrophage	Sgk1
2.26824e-53	18.8569	0.571	0.472	4.94635e-49	macrophage	Myof
2.42861e-53	69.3146	0.142	0.269	5.29606e-49	macrophage	Bcl11b
2.96527e-53	66.3652	0.658	0.534	6.46636e-49	macrophage	Zyx
3.19399e-53	626.232	0.724	0.651	6.96513e-49	macrophage	Hivep3
3.42275e-53	66.4659	0.707	0.605	7.46399e-49	macrophage	Zranb3
4.11636e-53	43.3827	0.595	0.485	8.97654e-49	macrophage	Klhl2
4.27887e-53	7.41369	0.47	0.341	9.33094e-49	macrophage	Ak2
5.9392e-53	31.815	0.564	0.443	1.29516e-48	macrophage	Pisd
7.31603e-53	54.9243	0.222	0.365	1.59541e-48	macrophage	Cldn10
8.65053e-53	36.1693	0.328	0.464	1.88642e-48	macrophage	Cpm
8.66814e-53	59.0724	0.497	0.387	1.89026e-48	macrophage	Igf2bp2
1.17852e-52	50.504	0.602	0.482	2.56999e-48	macrophage	Pgs1
1.18338e-52	18.8472	0.5	0.372	2.5806e-48	macrophage	Sema4a
1.35312e-52	20.3589	0.525	0.405	2.95075e-48	macrophage	Cebpg
1.69359e-52	17.4142	0.642	0.53	3.69322e-48	macrophage	Slc45a4
1.91836e-52	18.616	0.259	0.153	4.18336e-48	macrophage	Pld4
1.9951e-52	170.34	0.81	0.715	4.35071e-48	macrophage	Itsn1
2.10586e-52	18.3194	0.539	0.413	4.59225e-48	macrophage	Kif1c
2.1585e-52	31.8412	0.577	0.466	4.70704e-48	macrophage	Pde8a
2.43016e-52	62.1373	0.62	0.512	5.29945e-48	macrophage	Mthfd1
2.95391e-52	34.7226	0.456	0.361	6.44159e-48	macrophage	Pygb
3.50462e-52	2.23137	0.279	0.167	7.64254e-48	macrophage	Treml4
3.64979e-52	21.7319	0.45	0.336	7.9591e-48	macrophage	Acox3
3.74191e-52	53.4816	0.251	0.391	8.15997e-48	macrophage	Lef1
9.07237e-52	80.8927	0.667	0.551	1.97841e-47	macrophage	Arsg
1.23831e-51	21.8124	0.716	0.586	2.70039e-47	macrophage	Iqgap2
1.25148e-51	20.1859	0.266	0.161	2.7291e-47	macrophage	Trim47
1.29342e-51	39.475	0.562	0.435	2.82055e-47	macrophage	Sesn2
1.83385e-51	43.0032	0.537	0.42	3.99908e-47	macrophage	Pnpla2
2.03976e-51	11.616	0.302	0.186	4.4481e-47	macrophage	Susd4
2.65621e-51	41.94	0.604	0.493	5.7924e-47	macrophage	Fggy
3.4204e-51	34.6811	0.52	0.402	7.45887e-47	macrophage	Sdhb
3.44551e-51	32.8078	0.451	0.331	7.51362e-47	macrophage	Dyx1c1
3.63426e-51	27.954	0.533	0.405	7.92523e-47	macrophage	Stx7
4.58383e-51	168.887	0.804	0.723	9.99596e-47	macrophage	Map3k5
4.99909e-51	5.99364	0.35	0.233	1.09015e-46	macrophage	Slc38a7
5.00071e-51	36.3142	0.453	0.333	1.0905e-46	macrophage	Vat1
5.1004e-51	31.6857	0.453	0.333	1.11224e-46	macrophage	Rnd2
6.53536e-51	31.4744	0.513	0.379	1.42517e-46	macrophage	Fgr
6.84107e-51	240.928	0.82	0.661	1.49183e-46	macrophage	Ptk2b
6.94955e-51	28.9553	0.603	0.486	1.51549e-46	macrophage	Usp2
7.67778e-51	28.0881	0.372	0.254	1.67429e-46	macrophage	G630090E17Rik
8.07804e-51	66.4659	0.417	0.559	1.76158e-46	macrophage	Hdac7
9.04316e-51	27.6736	0.182	0.322	1.97204e-46	macrophage	Map9
9.8322e-51	121.288	0.325	0.212	2.14411e-46	macrophage	Wnk2
1.17104e-50	29.3985	0.497	0.379	2.55369e-46	macrophage	Tkt
1.17463e-50	301.611	0.879	0.784	2.56152e-46	macrophage	Cmip
1.3073e-50	56.367	0.648	0.54	2.85083e-46	macrophage	Zswim4
1.89249e-50	62.1378	0.608	0.474	4.12695e-46	macrophage	Tbc1d2b
2.26049e-50	31.8412	0.56	0.446	4.92945e-46	macrophage	Sbf2
2.32151e-50	20.2996	0.306	0.194	5.06252e-46	macrophage	Scel
2.52629e-50	10.3885	0.426	0.313	5.50908e-46	macrophage	Calcrl
2.95712e-50	27.8744	0.511	0.394	6.44859e-46	macrophage	Fbxo30
2.96706e-50	42.604	0.474	0.36	6.47027e-46	macrophage	Oscp1
3.13134e-50	67.9144	0.753	0.606	6.82852e-46	macrophage	2510003E04Rik
3.50114e-50	20.2996	0.517	0.415	7.63495e-46	macrophage	Akap7
4.41747e-50	57.7395	0.439	0.316	9.63317e-46	macrophage	Pola2
4.50386e-50	174.139	0.843	0.75	9.82156e-46	macrophage	Asap1
4.92097e-50	47.8923	0.555	0.44	1.07312e-45	macrophage	Ftl1
5.83202e-50	65.0181	0.642	0.538	1.27179e-45	macrophage	Sbno2
6.16888e-50	48.65	0.59	0.471	1.34525e-45	macrophage	Flot1
7.57184e-50	11.6403	0.324	0.21	1.65119e-45	macrophage	Tmtc3
9.01215e-50	19.1129	0.406	0.292	1.96528e-45	macrophage	Tmem168
9.37599e-50	2.89779	0.256	0.153	2.04462e-45	macrophage	Hspb7
9.59003e-50	7.29185	0.333	0.22	2.0913e-45	macrophage	Gm29094
1.01605e-49	28.3682	0.442	0.323	2.21571e-45	macrophage	Unc119
1.13645e-49	109.747	0.669	0.572	2.47825e-45	macrophage	Ttc39b
1.35185e-49	9.20996	0.465	0.342	2.94798e-45	macrophage	E2f8
1.39531e-49	66.1799	0.571	0.458	3.04276e-45	macrophage	3110043O21Rik
1.51491e-49	8.75674	0.324	0.213	3.30355e-45	macrophage	Ttll8
1.54153e-49	36.1424	0.605	0.504	3.36162e-45	macrophage	Dnajc13
1.77613e-49	87.9201	0.765	0.67	3.87321e-45	macrophage	Nfe2l2
1.81841e-49	108.304	0.762	0.667	3.96541e-45	macrophage	Picalm
1.84836e-49	75.122	0.667	0.558	4.03071e-45	macrophage	Spidr
2.13058e-49	40.4974	0.673	0.577	4.64616e-45	macrophage	Per2
2.16058e-49	34.7812	0.444	0.328	4.71158e-45	macrophage	Ldlr
2.42426e-49	184.767	0.813	0.742	5.28658e-45	macrophage	Nedd9
2.43855e-49	11.7769	0.336	0.225	5.31775e-45	macrophage	Arl1
2.4821e-49	173.225	0.887	0.828	5.41271e-45	macrophage	Klf13
2.63597e-49	53.4816	0.698	0.554	5.74826e-45	macrophage	Samsn1
2.74363e-49	27.4629	0.372	0.255	5.98304e-45	macrophage	Slc29a1
3.03449e-49	73.8742	0.648	0.543	6.61732e-45	macrophage	Tbc1d23
3.63707e-49	23.1654	0.389	0.281	7.93137e-45	macrophage	Zfp532
4.40437e-49	63.0356	0.596	0.484	9.60461e-45	macrophage	Maml1
4.77592e-49	5.76499	0.506	0.393	1.04149e-44	macrophage	Cluh
4.91755e-49	75.122	0.469	0.356	1.07237e-44	macrophage	Vps13c
4.93468e-49	18.857	0.508	0.625	1.07611e-44	macrophage	Ttc28
5.06447e-49	34.7266	0.419	0.294	1.10441e-44	macrophage	Plxna2
5.26372e-49	13.3434	0.385	0.271	1.14786e-44	macrophage	Nelfcd
5.38734e-49	60.6682	0.581	0.466	1.17482e-44	macrophage	Aph1c
6.12499e-49	31.7711	0.545	0.436	1.33568e-44	macrophage	Rab11fip5
6.43051e-49	37.0354	0.392	0.28	1.4023e-44	macrophage	Smpdl3a
7.04247e-49	47.6363	0.635	0.523	1.53575e-44	macrophage	Cdkl3
7.06033e-49	26.0704	0.653	0.559	1.53965e-44	macrophage	Arhgap31
7.15242e-49	1.67504	0.423	0.299	1.55973e-44	macrophage	Foxred2
7.54684e-49	22.8868	0.511	0.392	1.64574e-44	macrophage	Vps18
8.16522e-49	0.751948	0.307	0.196	1.78059e-44	macrophage	AB124611
8.64606e-49	37.6054	0.494	0.381	1.88545e-44	macrophage	Krr1
1.03139e-48	82.3172	0.638	0.532	2.24915e-44	macrophage	Raf1
1.28612e-48	37.6109	0.612	0.501	2.80464e-44	macrophage	Map2k3
1.70084e-48	63.3326	0.531	0.411	3.70902e-44	macrophage	Atg9a
1.97488e-48	34.6469	0.565	0.451	4.30663e-44	macrophage	Nod1
1.9869e-48	57.436	0.566	0.445	4.33282e-44	macrophage	Mcl1
2.00817e-48	47.2135	0.354	0.243	4.37922e-44	macrophage	Zfp658
2.29702e-48	49	0.609	0.478	5.00912e-44	macrophage	Gm21970
2.48734e-48	50.8648	0.598	0.486	5.42414e-44	macrophage	Rhob
2.70031e-48	25.5292	0.13	0.258	5.88857e-44	macrophage	Gimap5
3.68922e-48	39.8624	0.569	0.46	8.04509e-44	macrophage	Pla2g6
4.59519e-48	66.0064	0.638	0.498	1.00207e-43	macrophage	Pbx1
4.77801e-48	31.7466	0.562	0.44	1.04194e-43	macrophage	Psma6
5.05589e-48	31.8416	0.446	0.574	1.10254e-43	macrophage	Fam117a
5.21262e-48	105.419	0.444	0.331	1.13672e-43	macrophage	Sptb
6.51734e-48	24.6277	0.711	0.619	1.42124e-43	macrophage	Nfic
7.52173e-48	43.2725	0.602	0.488	1.64026e-43	macrophage	Synj1
7.65057e-48	24.6277	0.562	0.45	1.66836e-43	macrophage	Uck2
8.36417e-48	41.9399	0.428	0.298	1.82397e-43	macrophage	Mcf2l
1.07717e-47	1.54459	0.442	0.332	2.34898e-43	macrophage	Skp2
1.14611e-47	134.273	0.438	0.557	2.49933e-43	macrophage	Cuedc1
1.2021e-47	59.2522	0.667	0.568	2.62141e-43	macrophage	Bcl6
1.23445e-47	31.8412	0.565	0.45	2.69197e-43	macrophage	Ldlrap1
1.23758e-47	28.7787	0.414	0.297	2.6988e-43	macrophage	Fzd7
1.67606e-47	20.2983	0.484	0.368	3.65498e-43	macrophage	1700017B05Rik
1.96312e-47	87.1195	0.666	0.562	4.28097e-43	macrophage	Rassf5
2.00857e-47	72.2021	0.686	0.59	4.38008e-43	macrophage	Gys1
2.14182e-47	43.2998	0.654	0.519	4.67067e-43	macrophage	Map3k9
2.53299e-47	43.8082	0.472	0.365	5.5237e-43	macrophage	Cndp2
2.60062e-47	44.822	0.259	0.158	5.67117e-43	macrophage	Cemip
3.07862e-47	9.14473	0.282	0.178	6.71355e-43	macrophage	Dpep2
3.431e-47	46.1087	0.531	0.408	7.48197e-43	macrophage	Top3a
3.46929e-47	37.5314	0.518	0.39	7.56548e-43	macrophage	Pold4
3.65017e-47	164.498	0.795	0.701	7.95992e-43	macrophage	Irf2
3.8807e-47	35.7265	0.636	0.524	8.46264e-43	macrophage	Gnptab
4.26297e-47	124.173	0.743	0.636	9.29627e-43	macrophage	Ehd1
6.74428e-47	63.5803	0.165	0.297	1.47072e-42	macrophage	Bend5
9.15211e-47	19.2653	0.388	0.262	1.9958e-42	macrophage	Hhex
1.02067e-46	79.2049	0.357	0.481	2.22577e-42	macrophage	Tmem163
1.07095e-46	14.3533	0.402	0.284	2.33542e-42	macrophage	Fam45a
1.13753e-46	7.07767	0.315	0.208	2.48061e-42	macrophage	Tk1
1.23709e-46	60.4062	0.515	0.403	2.69773e-42	macrophage	Plekha1
1.55366e-46	11.0246	0.272	0.169	3.38807e-42	macrophage	Tomm20l
1.6275e-46	54.8905	0.315	0.451	3.54908e-42	macrophage	Tnk2
1.89423e-46	34.4914	0.601	0.48	4.13075e-42	macrophage	Dus2
1.93643e-46	82.7401	0.663	0.557	4.22278e-42	macrophage	Dyx1c1Ccpg1
1.94509e-46	2.43699	0.292	0.187	4.24165e-42	macrophage	Uap1l1
2.0739e-46	53.4815	0.671	0.572	4.52256e-42	macrophage	Npc1
2.13076e-46	18.2491	0.375	0.261	4.64655e-42	macrophage	Capn1
2.21344e-46	142.928	0.799	0.712	4.82684e-42	macrophage	Tspan14
2.2578e-46	16.1578	0.501	0.384	4.92358e-42	macrophage	Fam21
2.32526e-46	24.5924	0.18	0.308	5.07069e-42	macrophage	Grap
2.60319e-46	20.2991	0.498	0.387	5.67679e-42	macrophage	Pqlc1
2.84287e-46	18.8556	0.52	0.402	6.19945e-42	macrophage	Ncln
2.90771e-46	76.5619	0.678	0.57	6.34085e-42	macrophage	Bach1
3.05823e-46	18.7061	0.363	0.249	6.66909e-42	macrophage	Tctex1d2
3.10596e-46	3.41183	0.295	0.195	6.77316e-42	macrophage	Pltp
3.36821e-46	37.429	0.633	0.525	7.34505e-42	macrophage	Plekhm3
3.87318e-46	4.40876	0.373	0.261	8.44625e-42	macrophage	Pnkp
6.82096e-46	25.2383	0.421	0.305	1.48745e-41	macrophage	Cd151
7.22731e-46	9.9707	0.264	0.16	1.57606e-41	macrophage	Gm14548
8.2219e-46	123.99	0.771	0.676	1.79295e-41	macrophage	Jmjd1c
8.43688e-46	54.921	0.629	0.531	1.83983e-41	macrophage	Gna12
1.33078e-45	28.6904	0.496	0.392	2.90203e-41	macrophage	Tbc1d31
1.37064e-45	35.9235	0.598	0.486	2.98895e-41	macrophage	Fth1
1.54749e-45	75.122	0.772	0.682	3.37461e-41	macrophage	Elf2
1.67416e-45	54.7692	0.648	0.534	3.65083e-41	macrophage	Il6ra
2.20152e-45	6.05588	0.51	0.395	4.80086e-41	macrophage	Rragc
2.59761e-45	27.5121	0.546	0.435	5.6646e-41	macrophage	Gadd45g
2.96971e-45	28.5038	0.585	0.474	6.47604e-41	macrophage	Gm20671
3.1386e-45	21.7424	0.596	0.484	6.84434e-41	macrophage	B3gntl1
3.59458e-45	70.7901	0.252	0.396	7.83871e-41	macrophage	Hes1
4.12135e-45	60.6949	0.56	0.444	8.98743e-41	macrophage	Nkiras2
4.52528e-45	79.2654	0.251	0.156	9.86827e-41	macrophage	Rims3
4.91089e-45	11.4269	0.285	0.183	1.07092e-40	macrophage	Cyb5r1
4.91393e-45	19.8534	0.511	0.382	1.07158e-40	macrophage	Hcst
5.04887e-45	14.5453	0.388	0.277	1.10101e-40	macrophage	Intu
7.4503e-45	13.0897	0.384	0.524	1.62469e-40	macrophage	Setbp1.1
7.5002e-45	2.98728	0.592	0.489	1.63557e-40	macrophage	Tmem170b
7.63036e-45	57.7806	0.582	0.47	1.66395e-40	macrophage	Capza2
8.45526e-45	45.8134	0.643	0.524	1.84384e-40	macrophage	Ostf1
9.99274e-45	32.1421	0.517	0.405	2.17912e-40	macrophage	Tpd52l2
1.13586e-44	84.9754	0.709	0.621	2.47696e-40	macrophage	Fbxw7
1.24419e-44	38.6762	0.266	0.393	2.71321e-40	macrophage	Sell
1.97589e-44	14.9661	0.37	0.264	4.30881e-40	macrophage	Lrrc58
2.26998e-44	92.4342	0.78	0.689	4.95014e-40	macrophage	Igf1r
3.09969e-44	40.9519	0.593	0.466	6.75949e-40	macrophage	Adap1
3.36504e-44	27.1354	0.198	0.314	7.33814e-40	macrophage	Gm8369
3.54937e-44	27.5131	0.44	0.33	7.74011e-40	macrophage	Rasal2
3.59549e-44	48.9922	0.231	0.363	7.84069e-40	macrophage	Hif3a
4.37169e-44	21.5047	0.347	0.245	9.53335e-40	macrophage	Ech1
4.53641e-44	54.8525	0.607	0.493	9.89255e-40	macrophage	Mafg
4.73933e-44	115.517	0.753	0.633	1.03351e-39	macrophage	Dock10
5.27982e-44	63.5805	0.543	0.443	1.15137e-39	macrophage	Gpr146
5.58788e-44	13.0167	0.436	0.317	1.21855e-39	macrophage	Osgin1
6.05225e-44	34.2271	0.549	0.439	1.31981e-39	macrophage	Oxsm
6.08822e-44	29.329	0.484	0.371	1.32766e-39	macrophage	Gm16253
6.70476e-44	24.6274	0.386	0.261	1.46211e-39	macrophage	Cmklr1
7.20342e-44	17.6815	0.375	0.265	1.57085e-39	macrophage	Ctbs
7.64722e-44	39.0279	0.546	0.427	1.66763e-39	macrophage	Fam111a
8.10573e-44	30.3279	0.532	0.415	1.76762e-39	macrophage	Creb3
8.53712e-44	24.6911	0.489	0.378	1.86169e-39	macrophage	Lamtor4
1.1406e-43	9.33354	0.351	0.241	2.48731e-39	macrophage	Tnfrsf23
1.21806e-43	56.3407	0.646	0.554	2.65622e-39	macrophage	Oxsr1
1.63429e-43	43.0456	0.561	0.45	3.5639e-39	macrophage	Gm9949
2.22709e-43	31.3269	0.396	0.283	4.85661e-39	macrophage	C2cd2l
2.25032e-43	137.084	0.368	0.477	4.90728e-39	macrophage	Ebf1
2.25718e-43	122.476	0.748	0.662	4.92224e-39	macrophage	Cnnm2
2.31125e-43	28.7673	0.473	0.365	5.04014e-39	macrophage	Pcyt1a
2.97907e-43	28.8855	0.421	0.311	6.49646e-39	macrophage	Nr1h3
3.07753e-43	30.3142	0.601	0.472	6.71117e-39	macrophage	Meig1
3.08442e-43	87.7919	0.3	0.196	6.7262e-39	macrophage	Pdgfrl
3.09663e-43	16.0339	0.318	0.215	6.75283e-39	macrophage	Pecr
4.68803e-43	31.8045	0.541	0.429	1.02232e-38	macrophage	Stk38
5.68887e-43	56.1768	0.611	0.511	1.24057e-38	macrophage	Heatr1
6.44436e-43	101.09	0.528	0.423	1.40532e-38	macrophage	Prune
9.95426e-43	26.0235	0.457	0.346	2.17073e-38	macrophage	Rnf166
1.06892e-42	26.074	0.574	0.468	2.331e-38	macrophage	Arhgef2
1.11545e-42	16.6575	0.335	0.226	2.43246e-38	macrophage	Ceacam19
1.12889e-42	65.2437	0.661	0.56	2.46178e-38	macrophage	Nampt
1.31091e-42	60.6478	0.526	0.418	2.85869e-38	macrophage	Kctd20
1.38912e-42	197.777	0.884	0.819	3.02925e-38	macrophage	Zmiz1
1.43118e-42	126.981	0.772	0.683	3.12097e-38	macrophage	Pnrc1
1.69284e-42	27.5131	0.53	0.425	3.69158e-38	macrophage	Ncapg2
1.7827e-42	14.2526	0.273	0.177	3.88753e-38	macrophage	Pros1
1.78436e-42	24.8787	0.514	0.408	3.89115e-38	macrophage	Mib1
2.39652e-42	70.7176	0.526	0.423	5.22609e-38	macrophage	Scp2
2.43031e-42	8.75805	0.288	0.184	5.29979e-38	macrophage	Flrt2
2.62921e-42	47.2589	0.653	0.542	5.73352e-38	macrophage	Cbl
2.66334e-42	31.7596	0.256	0.161	5.80795e-38	macrophage	Slc2a5
2.66807e-42	36.1693	0.547	0.455	5.81827e-38	macrophage	Atp10a
2.81736e-42	4.42278	0.375	0.255	6.14382e-38	macrophage	Scnn1a
2.84365e-42	16.0587	0.382	0.271	6.20114e-38	macrophage	Zfp768
2.97733e-42	11.6505	0.392	0.287	6.49267e-38	macrophage	Degs1
3.05346e-42	76.5647	0.526	0.617	6.65867e-38	macrophage	Smad7
3.21084e-42	150.142	0.817	0.64	7.00189e-38	macrophage	Inpp5d
3.61002e-42	61.9512	0.53	0.421	7.87236e-38	macrophage	Myadm
3.62148e-42	7.08893	0.343	0.239	7.89736e-38	macrophage	S100a11
3.788e-42	13.2603	0.261	0.166	8.2605e-38	macrophage	Unc5a
4.49427e-42	63.8246	0.413	0.307	9.80066e-38	macrophage	Cd3eap
5.05637e-42	20.6507	0.376	0.271	1.10264e-37	macrophage	Gpt2
5.06052e-42	9.7609	0.451	0.341	1.10355e-37	macrophage	Mical2
6.29558e-42	9.01684	0.288	0.19	1.37288e-37	macrophage	Zbtb32
6.3856e-42	274.214	0.665	0.552	1.39251e-37	macrophage	Tns1
7.79704e-42	28.9558	0.553	0.464	1.7003e-37	macrophage	Tpk1
8.81942e-42	62.1377	0.286	0.416	1.92325e-37	macrophage	Cxxc5
1.01502e-41	56.1715	0.626	0.529	2.21345e-37	macrophage	Fzr1
1.21629e-41	26.0704	0.512	0.403	2.65237e-37	macrophage	Usf2
1.30737e-41	129.309	0.789	0.718	2.85098e-37	macrophage	Slc22a14
1.50923e-41	13.2689	0.405	0.302	3.29118e-37	macrophage	Fam118b
2.17315e-41	44.6336	0.256	0.39	4.739e-37	macrophage	Ccdc85c
2.55026e-41	23.1831	0.381	0.287	5.56136e-37	macrophage	Capn15
2.59909e-41	17.4842	0.55	0.434	5.66783e-37	macrophage	Slc16a6
2.63983e-41	88.1022	0.65	0.552	5.75668e-37	macrophage	Gm20708
3.10211e-41	25.6394	0.37	0.262	6.76477e-37	macrophage	BC021785
3.46932e-41	47.1103	0.562	0.452	7.56554e-37	macrophage	Pitpna
3.50517e-41	11.6435	0.619	0.525	7.64373e-37	macrophage	Stard9
3.70888e-41	10.8643	0.258	0.163	8.08796e-37	macrophage	Rsph3a
4.47482e-41	67.9099	0.704	0.609	9.75825e-37	macrophage	Lmnb1
6.29206e-41	15.9715	0.501	0.39	1.37211e-36	macrophage	Trappc3
6.58882e-41	10.1972	0.51	0.42	1.43682e-36	macrophage	Ppp1r12b
7.11777e-41	27.0703	0.499	0.385	1.55217e-36	macrophage	Ikbkb
7.87341e-41	24.8101	0.391	0.282	1.71695e-36	macrophage	A930002H24Rik
8.27777e-41	20.2996	0.557	0.457	1.80513e-36	macrophage	Ccni
8.7831e-41	23.4844	0.35	0.245	1.91533e-36	macrophage	Sephs2
1.01814e-40	18.5348	0.308	0.207	2.22026e-36	macrophage	Stard8
1.05207e-40	52.0122	0.28	0.401	2.29426e-36	macrophage	Phldb2
1.18044e-40	59.2519	0.29	0.19	2.57418e-36	macrophage	Glis1
1.35759e-40	37.612	0.696	0.584	2.96049e-36	macrophage	Grb2
1.40499e-40	62.1377	0.282	0.405	3.06386e-36	macrophage	Slc12a8
1.60308e-40	64.4434	0.482	0.388	3.49584e-36	macrophage	Dak
1.85402e-40	98.1278	0.696	0.576	4.04306e-36	macrophage	Zc3h12a
2.85749e-40	20.7743	0.425	0.317	6.23133e-36	macrophage	Slc26a11
3.90523e-40	0.55028	0.169	0.279	8.51614e-36	macrophage	Blk
4.20908e-40	22.6429	0.468	0.36	9.17874e-36	macrophage	Hexb
5.75706e-40	200.601	0.635	0.569	1.25544e-35	macrophage	Frmd4b
6.51871e-40	3.06385	0.389	0.289	1.42154e-35	macrophage	Cmc1
7.58556e-40	69.2943	0.567	0.482	1.65418e-35	macrophage	Usp49
7.95898e-40	60.4478	0.633	0.547	1.73562e-35	macrophage	Daam1
8.00163e-40	53.4814	0.579	0.472	1.74492e-35	macrophage	Txnrd1
8.23868e-40	43.3592	0.535	0.41	1.79661e-35	macrophage	Gm21975
8.26357e-40	2.97942	0.291	0.194	1.80204e-35	macrophage	Coq5
8.97525e-40	36.1631	0.473	0.367	1.95723e-35	macrophage	Tmem165
9.10574e-40	79.433	0.352	0.472	1.98569e-35	macrophage	Ptp4a3
1.05677e-39	23.185	0.703	0.603	2.30449e-35	macrophage	Rnf26
1.10601e-39	27.2767	0.5	0.392	2.41187e-35	macrophage	Nek9
1.20904e-39	9.39448	0.368	0.269	2.63655e-35	macrophage	Khk
1.42131e-39	84.7884	0.67	0.579	3.09946e-35	macrophage	Rbpj
1.49195e-39	92.4344	0.664	0.558	3.25349e-35	macrophage	Tcte2
1.61324e-39	20.2281	0.405	0.293	3.51798e-35	macrophage	Evi2a
1.69514e-39	88.1063	0.458	0.565	3.69658e-35	macrophage	Arhgef10
1.75168e-39	226.575	0.774	0.677	3.81988e-35	macrophage	Stk10
1.80546e-39	18.2736	0.37	0.268	3.93716e-35	macrophage	Ctsa
1.83465e-39	16.1954	0.517	0.406	4.00081e-35	macrophage	Pgam1
1.97416e-39	12.6776	0.547	0.441	4.30505e-35	macrophage	Plk3
2.11739e-39	80.7085	0.721	0.623	4.61739e-35	macrophage	Cltc
2.2252e-39	46.2681	0.6	0.505	4.85249e-35	macrophage	Asxl1
2.26015e-39	50.7041	0.601	0.487	4.92871e-35	macrophage	Ptpn6
2.28368e-39	50.5915	0.632	0.543	4.98002e-35	macrophage	Tiparp
2.40301e-39	37.4745	0.624	0.519	5.24025e-35	macrophage	Psen2
2.48724e-39	33.0274	0.509	0.403	5.42393e-35	macrophage	Med11
2.80067e-39	47.7108	0.277	0.179	6.10742e-35	macrophage	Dnah5
3.1492e-39	45.7816	0.568	0.472	6.86746e-35	macrophage	Cyb5r3
4.17279e-39	21.7159	0.294	0.195	9.09961e-35	macrophage	Emp1
4.38633e-39	16.4117	0.471	0.357	9.56527e-35	macrophage	Slc2a6
5.01347e-39	31.612	0.445	0.334	1.09329e-34	macrophage	Arl8a
5.12231e-39	203.512	0.797	0.72	1.11702e-34	macrophage	Iqsec1
5.88743e-39	17.4059	0.413	0.31	1.28387e-34	macrophage	Cmpk1
6.34529e-39	14.2873	0.236	0.355	1.38372e-34	macrophage	Tcf7
6.42791e-39	29.9068	0.438	0.333	1.40173e-34	macrophage	Tmem86a
9.15342e-39	37.5407	0.678	0.583	1.99609e-34	macrophage	Ell2
1.05372e-38	93.8407	0.752	0.653	2.29785e-34	macrophage	Wipf1
1.06453e-38	50.9882	0.473	0.389	2.32141e-34	macrophage	Ppargc1b
1.12526e-38	7.79446	0.268	0.176	2.45386e-34	macrophage	Gsto1
1.17257e-38	3.17067	0.511	0.408	2.55703e-34	macrophage	Mre11a
1.23499e-38	4.08183	0.556	0.454	2.69314e-34	macrophage	Stk38l
1.32864e-38	155.733	0.802	0.726	2.89737e-34	macrophage	Ski
1.35239e-38	39.1137	0.4	0.3	2.94915e-34	macrophage	Plod3
1.42124e-38	39.4565	0.438	0.33	3.09929e-34	macrophage	Mvp
1.43986e-38	38.8995	0.443	0.339	3.1399e-34	macrophage	St6galnac6
1.44121e-38	10.228	0.404	0.302	3.14285e-34	macrophage	Cluap1
1.55525e-38	41.8685	0.482	0.356	3.39154e-34	macrophage	Cd83
1.58522e-38	4.43276	0.373	0.269	3.45689e-34	macrophage	Abcc3
1.64551e-38	60.6951	0.541	0.445	3.58836e-34	macrophage	Fam168a
1.84176e-38	67.8946	0.589	0.488	4.01633e-34	macrophage	Rnf216
1.89673e-38	194.84	0.836	0.713	4.13621e-34	macrophage	Xylt1
2.28958e-38	40.4952	0.425	0.322	4.99289e-34	macrophage	Nhlrc2
2.60148e-38	61.9124	0.656	0.566	5.67305e-34	macrophage	Fos
2.77238e-38	81.0509	0.651	0.549	6.04572e-34	macrophage	Ubc
2.80172e-38	29.8978	0.52	0.409	6.10972e-34	macrophage	Tfip11
2.96572e-38	17.4137	0.515	0.413	6.46734e-34	macrophage	Gnb1
3.03038e-38	56.367	0.6	0.499	6.60835e-34	macrophage	Tesk2
3.13517e-38	13.0884	0.4	0.305	6.83687e-34	macrophage	Myo7a
3.37386e-38	11.6435	0.374	0.271	7.35738e-34	macrophage	Bnip2
4.13686e-38	4.3333	0.257	0.167	9.02125e-34	macrophage	Cyb561
4.22936e-38	28.9558	0.538	0.443	9.22296e-34	macrophage	Xdh
4.26276e-38	11.2481	0.278	0.185	9.29579e-34	macrophage	2510009E07Rik
5.54278e-38	59.2535	0.689	0.576	1.20872e-33	macrophage	Patl2
5.91117e-38	90.9917	0.397	0.295	1.28905e-33	macrophage	Ago3
6.29335e-38	17.6021	0.404	0.3	1.37239e-33	macrophage	Comtd1
6.55334e-38	121.288	0.375	0.507	1.42909e-33	macrophage	Sorcs2
6.75545e-38	15.7575	0.374	0.275	1.47316e-33	macrophage	Tmem14c
7.62002e-38	31.8412	0.361	0.266	1.6617e-33	macrophage	Myrip
7.68983e-38	43.3145	0.452	0.349	1.67692e-33	macrophage	Ten1
8.81276e-38	10.5179	0.283	0.189	1.9218e-33	macrophage	Acp2
1.01324e-37	72.3032	0.682	0.548	2.20958e-33	macrophage	Srgn
1.0289e-37	41.9134	0.554	0.428	2.24372e-33	macrophage	Cnr2
1.04334e-37	23.1592	0.513	0.398	2.2752e-33	macrophage	N4bp2l1
1.05244e-37	5.87159	0.414	0.317	2.29506e-33	macrophage	4931406C07Rik
1.12663e-37	105.415	0.728	0.599	2.45684e-33	macrophage	Arap1
1.34677e-37	23.3245	0.323	0.23	2.9369e-33	macrophage	Cmtm3
1.40597e-37	4.42636	0.345	0.242	3.066e-33	macrophage	Rnd1
1.48338e-37	105.842	0.712	0.573	3.23482e-33	macrophage	Ptprc
1.55442e-37	28.9572	0.478	0.38	3.38973e-33	macrophage	Map7d1
1.6788e-37	11.5124	0.459	0.35	3.66097e-33	macrophage	Ric8
1.72263e-37	26.0704	0.359	0.257	3.75655e-33	macrophage	Lrrc63
1.91397e-37	23.1126	0.452	0.347	4.1738e-33	macrophage	Blcap
1.93948e-37	5.80745	0.377	0.275	4.22943e-33	macrophage	Dnase1l1
2.03635e-37	31.5729	0.434	0.326	4.44067e-33	macrophage	Gngt2
2.37786e-37	15.9715	0.478	0.389	5.18539e-33	macrophage	Apopt1
2.43151e-37	99.6475	0.639	0.544	5.30239e-33	macrophage	Map3k11
2.47083e-37	11.8755	0.298	0.199	5.38814e-33	macrophage	Rgs1
2.64388e-37	71.7304	0.561	0.476	5.76551e-33	macrophage	Camk2g
2.81661e-37	3.09089	0.287	0.195	6.14218e-33	macrophage	Gstm4
3.21317e-37	8.31405	0.299	0.206	7.00695e-33	macrophage	Slamf7
3.43714e-37	1.10852	0.511	0.422	7.49538e-33	macrophage	Ctsc
3.56516e-37	28.9558	0.509	0.406	7.77453e-33	macrophage	Lcmt1
3.77315e-37	22.1456	0.335	0.24	8.2281e-33	macrophage	Hps6
4.10928e-37	50.6652	0.613	0.491	8.96111e-33	macrophage	Kctd12
4.17671e-37	14.5851	0.436	0.333	9.10815e-33	macrophage	Ndufaf7
4.27151e-37	129.944	0.83	0.76	9.31489e-33	macrophage	Zswim6
4.389e-37	103.897	0.725	0.615	9.57108e-33	macrophage	Tnfrsf1b
4.70403e-37	46.2681	0.423	0.525	1.02581e-32	macrophage	Lbh
5.33812e-37	7.1752	0.286	0.192	1.16408e-32	macrophage	Gtf2h3
6.22281e-37	0.640828	0.351	0.254	1.35701e-32	macrophage	Lamtor3
6.67975e-37	77.7735	0.545	0.446	1.45665e-32	macrophage	Afmid
6.7052e-37	31.3985	0.54	0.441	1.4622e-32	macrophage	Cdc42ep4
6.8732e-37	57.8132	0.588	0.491	1.49884e-32	macrophage	Unc13a
7.31763e-37	50.5962	0.578	0.476	1.59576e-32	macrophage	Hmga1
7.66412e-37	150.142	0.487	0.594	1.67131e-32	macrophage	Man1a
7.77858e-37	131.154	0.669	0.578	1.69628e-32	macrophage	Cap1
8.43524e-37	19.4236	0.539	0.433	1.83947e-32	macrophage	Maea
8.43745e-37	36.5501	0.185	0.295	1.83995e-32	macrophage	Tnfrsf10b
8.63207e-37	48.4916	0.542	0.439	1.8824e-32	macrophage	Ist1
9.43211e-37	80.8928	0.671	0.572	2.05686e-32	macrophage	Gna13
1.11744e-36	41.9006	0.607	0.505	2.43679e-32	macrophage	Tln1
1.12595e-36	22.6735	0.426	0.327	2.45536e-32	macrophage	Nuak2
1.28416e-36	229.487	0.848	0.776	2.80037e-32	macrophage	Atp5o
1.43628e-36	24.2541	0.51	0.41	3.13209e-32	macrophage	Man2a2
1.56381e-36	34.7266	0.559	0.447	3.41019e-32	macrophage	Bid
1.72926e-36	20.0363	0.336	0.24	3.771e-32	macrophage	Tnfrsf12a
1.74597e-36	23.1845	0.524	0.44	3.80744e-32	macrophage	Deptor
2.21452e-36	7.56349	0.449	0.342	4.82921e-32	macrophage	Bet1l
2.26541e-36	8.75643	0.257	0.171	4.94017e-32	macrophage	Gpr156
2.31755e-36	17.2333	0.41	0.311	5.05387e-32	macrophage	Ifi30
3.2041e-36	31.841	0.643	0.552	6.98717e-32	macrophage	Cntrl
3.24909e-36	118.376	0.755	0.676	7.08529e-32	macrophage	Plec
3.65795e-36	17.2776	0.277	0.185	7.9769e-32	macrophage	Gabarapl1
4.69878e-36	66.4658	0.572	0.465	1.02466e-31	macrophage	Chmp4b
5.23287e-36	14.7821	0.467	0.374	1.14113e-31	macrophage	Cdc42ep3
5.59884e-36	30.2927	0.494	0.394	1.22094e-31	macrophage	Pnp
5.60758e-36	22.4972	0.372	0.272	1.22285e-31	macrophage	Pdcd2l
5.92076e-36	38.9065	0.506	0.406	1.29114e-31	macrophage	Rnf24
5.96957e-36	8.87563	0.313	0.225	1.30178e-31	macrophage	Sec14l2
6.18499e-36	27.0334	0.312	0.217	1.34876e-31	macrophage	Dnaaf3
6.59505e-36	37.6069	0.486	0.389	1.43818e-31	macrophage	Dcun1d2
7.16849e-36	49.2236	0.726	0.635	1.56323e-31	macrophage	Dusp1
7.20204e-36	17.4143	0.443	0.343	1.57055e-31	macrophage	Hccs
7.33901e-36	42.3729	0.375	0.28	1.60042e-31	macrophage	Aldh9a1
9.0821e-36	44.132	0.516	0.415	1.98053e-31	macrophage	Cnnm4
9.89618e-36	59.2517	0.705	0.632	2.15806e-31	macrophage	Mxi1
1.01359e-35	54.0514	0.454	0.353	2.21033e-31	macrophage	Casp8
1.04336e-35	17.0218	0.321	0.224	2.27525e-31	macrophage	BC037034
1.04336e-35	17.0218	0.321	0.224	2.27525e-31	macrophage	BC037034.1
1.06869e-35	9.93896	0.387	0.288	2.3305e-31	macrophage	Ctsl
1.113e-35	129.944	0.293	0.199	2.42713e-31	macrophage	Kctd16
1.32837e-35	28.1305	0.515	0.411	2.89677e-31	macrophage	Nudt18
1.33438e-35	38.9778	0.51	0.42	2.90988e-31	macrophage	Aloxe3
1.44041e-35	33.4685	0.43	0.33	3.14111e-31	macrophage	Jup
1.52726e-35	58.3516	0.541	0.434	3.33049e-31	macrophage	Rab7
1.67375e-35	105.349	0.711	0.648	3.64994e-31	macrophage	Klf6
1.68144e-35	4.5004	0.324	0.237	3.66672e-31	macrophage	Wwtr1
1.74317e-35	49.7682	0.565	0.469	3.80134e-31	macrophage	Eno1
1.85233e-35	28.7693	0.361	0.268	4.03937e-31	macrophage	Metap1d
1.92743e-35	32.4818	0.464	0.368	4.20315e-31	macrophage	Rbl1
1.94498e-35	62.1279	0.389	0.297	4.24143e-31	macrophage	Rarb
2.02304e-35	11.0216	0.316	0.219	4.41164e-31	macrophage	Tpi1
2.06161e-35	13.2693	0.621	0.526	4.49575e-31	macrophage	Arhgap18
2.2709e-35	11.6434	0.286	0.392	4.95215e-31	macrophage	Epb4.1l4b
2.30204e-35	82.3335	0.598	0.5	5.02005e-31	macrophage	Ubb
2.57174e-35	33.2839	0.459	0.357	5.6082e-31	macrophage	Myh10
2.57379e-35	8.34208	0.275	0.187	5.61266e-31	macrophage	Tmem151a
2.58053e-35	25.0015	0.339	0.248	5.62737e-31	macrophage	Fzd4
2.70969e-35	13.626	0.365	0.265	5.90901e-31	macrophage	Ccdc84
2.79116e-35	61.597	0.626	0.535	6.08668e-31	macrophage	Fcho2
3.87609e-35	16.1002	0.382	0.281	8.45259e-31	macrophage	Cct4
3.9285e-35	47.5675	0.652	0.565	8.56688e-31	macrophage	Ptp4a1
4.28977e-35	98.9006	0.685	0.599	9.35469e-31	macrophage	Nadk
4.39595e-35	114.075	0.674	0.597	9.58625e-31	macrophage	Slc39a11
5.14603e-35	40.3004	0.507	0.409	1.12219e-30	macrophage	Ramp1
5.59523e-35	105.31	0.654	0.57	1.22015e-30	macrophage	Tor1aip2
6.22432e-35	18.1769	0.33	0.234	1.35734e-30	macrophage	Trim69
6.47838e-35	14.4389	0.471	0.378	1.41274e-30	macrophage	Dnal4
6.65022e-35	69.1216	0.554	0.466	1.45021e-30	macrophage	Tmed7
7.5786e-35	60.0261	0.596	0.498	1.65267e-30	macrophage	Ccnl1
7.95268e-35	1.54458	0.369	0.277	1.73424e-30	macrophage	Unc13b
8.02298e-35	135.713	0.728	0.633	1.74957e-30	macrophage	Spag9
8.37295e-35	30.8274	0.322	0.227	1.82589e-30	macrophage	Dock3
9.76365e-35	33.1007	0.58	0.48	2.12916e-30	macrophage	9030624J02Rik
9.78848e-35	40.4776	0.568	0.482	2.13457e-30	macrophage	Cep170
1.00636e-34	65.0196	0.728	0.633	2.19456e-30	macrophage	Oxr1
1.04645e-34	128.474	0.773	0.694	2.28199e-30	macrophage	Wdfy2
1.16794e-34	47.5127	0.627	0.54	2.54693e-30	macrophage	Cpeb2
1.36988e-34	59.0593	0.312	0.416	2.98729e-30	macrophage	Dthd1
1.42182e-34	26.6891	0.393	0.296	3.10056e-30	macrophage	Lamp1
1.46666e-34	15.1285	0.284	0.195	3.19834e-30	macrophage	Wdr36
1.4945e-34	38.3539	0.509	0.415	3.25905e-30	macrophage	Gyk
1.67526e-34	23.0957	0.424	0.319	3.65324e-30	macrophage	Rgs19
1.72934e-34	119.393	0.758	0.668	3.77118e-30	macrophage	Tbc1d14
1.77142e-34	47.7102	0.559	0.461	3.86293e-30	macrophage	M1ap
1.83905e-34	8.83253	0.436	0.334	4.01042e-30	macrophage	Orai3
1.94217e-34	13.0766	0.444	0.347	4.23529e-30	macrophage	Rabep1
2.08868e-34	64.6424	0.475	0.386	4.55477e-30	macrophage	Tagln2
2.0922e-34	48.5451	0.527	0.41	4.56245e-30	macrophage	Arhgap30
2.49284e-34	16.7168	0.266	0.18	5.43614e-30	macrophage	Tnfrsf22
3.26795e-34	7.91094	0.298	0.211	7.12641e-30	macrophage	Pcyox1
3.35164e-34	63.5804	0.635	0.555	7.30892e-30	macrophage	Scarb2
3.46606e-34	37.6015	0.417	0.303	7.55844e-30	macrophage	Cd180
3.63252e-34	48.6929	0.507	0.408	7.92143e-30	macrophage	Hscb
3.77339e-34	28.9278	0.566	0.483	8.22863e-30	macrophage	Myl12a
3.93771e-34	30.3955	0.454	0.356	8.58697e-30	macrophage	Atp6v1c1
4.03064e-34	47.3353	0.394	0.3	8.78962e-30	macrophage	G6pdx
4.12676e-34	187.469	0.461	0.351	8.99922e-30	macrophage	Fhad1
4.31636e-34	0.364326	0.315	0.223	9.41269e-30	macrophage	Mlh3
4.78544e-34	33.3442	0.441	0.34	1.04356e-29	macrophage	Man2b1
5.04825e-34	47.7108	0.616	0.544	1.10087e-29	macrophage	Pnpla8
5.15899e-34	1.61491	0.25	0.165	1.12502e-29	macrophage	Slc8a2
6.14371e-34	79.4486	0.445	0.342	1.33976e-29	macrophage	Tdrd7
6.18821e-34	14.3598	0.371	0.276	1.34946e-29	macrophage	Prr13
6.29888e-34	86.6192	0.586	0.503	1.3736e-29	macrophage	Plekhf2
6.38834e-34	88.1063	0.737	0.646	1.39311e-29	macrophage	Mrpl33
6.77097e-34	79.4368	0.6	0.511	1.47655e-29	macrophage	Wnt5b
6.89813e-34	56.253	0.631	0.557	1.50427e-29	macrophage	Bhlhe40
7.64647e-34	50.098	0.496	0.399	1.66747e-29	macrophage	Krcc1
8.16067e-34	67.9085	0.67	0.577	1.7796e-29	macrophage	Edem1
1.06893e-33	34.5731	0.449	0.349	2.33101e-29	macrophage	Clp1
1.14475e-33	28.9558	0.501	0.406	2.49635e-29	macrophage	Nup54
1.17204e-33	54.8742	0.587	0.498	2.55586e-29	macrophage	Chka
1.20512e-33	47.6741	0.586	0.499	2.62801e-29	macrophage	Bnip3l
1.3866e-33	2.18976	0.262	0.181	3.02375e-29	macrophage	Nxph4
1.44976e-33	7.35203	0.424	0.318	3.1615e-29	macrophage	Ncf1
1.4583e-33	72.2072	0.634	0.527	3.18011e-29	macrophage	Dusp5
1.52675e-33	37.612	0.25	0.361	3.32938e-29	macrophage	Kcnb1
1.58067e-33	34.4604	0.502	0.415	3.44697e-29	macrophage	Zfp703
1.60342e-33	118.264	0.688	0.596	3.49659e-29	macrophage	Zbtb7b
1.61105e-33	43.2377	0.5	0.397	3.51321e-29	macrophage	Bnip3
1.61405e-33	47.7108	0.452	0.548	3.51976e-29	macrophage	Foxo1
1.63076e-33	15.3703	0.418	0.317	3.5562e-29	macrophage	Hgsnat
1.78869e-33	75.7022	0.585	0.495	3.90059e-29	macrophage	Laptm4a
1.93083e-33	53.4552	0.637	0.553	4.21056e-29	macrophage	Cask
2.10595e-33	56.0319	0.485	0.386	4.59245e-29	macrophage	Efcab14
2.13551e-33	64.6296	0.58	0.477	4.6569e-29	macrophage	Mrpl41
2.14259e-33	80.8928	0.523	0.435	4.67236e-29	macrophage	Celf4
2.19538e-33	46.4706	0.516	0.419	4.78747e-29	macrophage	2010109A12Rik
2.52754e-33	28.9555	0.503	0.404	5.5118e-29	macrophage	Zkscan6
2.95994e-33	73.1858	0.493	0.402	6.45474e-29	macrophage	Fbxl18
3.05576e-33	19.3808	0.335	0.24	6.6637e-29	macrophage	Pctp
3.24546e-33	34.2513	0.565	0.469	7.07737e-29	macrophage	Egr2
3.73448e-33	33.2838	0.496	0.39	8.14379e-29	macrophage	Smcr8
3.9376e-33	87.6533	0.594	0.503	8.58672e-29	macrophage	Fam120a
4.0922e-33	76.2108	0.59	0.494	8.92387e-29	macrophage	Fbxl19
4.2084e-33	10.2038	0.563	0.473	9.17727e-29	macrophage	Snx13
4.2661e-33	3.17303	0.446	0.34	9.30309e-29	macrophage	Irf5
4.27068e-33	48.2695	0.497	0.404	9.31307e-29	macrophage	Fuca1
4.4402e-33	41.9386	0.515	0.412	9.68274e-29	macrophage	Tbk1
5.04407e-33	22.0994	0.417	0.317	1.09996e-28	macrophage	Lamp2
5.06439e-33	11.6342	0.151	0.261	1.10439e-28	macrophage	Pou2af1
5.64919e-33	95.3198	0.626	0.545	1.23192e-28	macrophage	Clip2
5.94804e-33	14.6458	0.238	0.341	1.29709e-28	macrophage	Bcl9l
5.97546e-33	49.6054	0.629	0.547	1.30307e-28	macrophage	Inpp4a
6.01165e-33	5.87304	0.298	0.21	1.31096e-28	macrophage	Mrps35
6.41771e-33	26.7494	0.435	0.34	1.39951e-28	macrophage	Kazald1
6.64399e-33	57.789	0.422	0.318	1.44886e-28	macrophage	Kcnk13
7.70122e-33	14.2353	0.278	0.19	1.6794e-28	macrophage	Dpagt1
7.78996e-33	26.5875	0.416	0.324	1.69876e-28	macrophage	Plekhb2
1.02994e-32	97.9596	0.709	0.612	2.24599e-28	macrophage	Ptpn1
1.0921e-32	7.31533	0.263	0.177	2.38154e-28	macrophage	Prelid2
1.2243e-32	54.9235	0.272	0.184	2.66982e-28	macrophage	Car5b
1.25523e-32	165.766	0.636	0.56	2.73728e-28	macrophage	Lyst
1.28074e-32	60.6964	0.772	0.708	2.79291e-28	macrophage	Chd9
1.31083e-32	57.8061	0.535	0.454	2.85852e-28	macrophage	Dcun1d3
1.34378e-32	58.2503	0.489	0.398	2.93038e-28	macrophage	Wdr62
1.38153e-32	51.567	0.523	0.45	3.01271e-28	macrophage	Anxa5
1.40495e-32	39.9027	0.487	0.392	3.06378e-28	macrophage	Mpdu1
1.41881e-32	18.2405	0.37	0.272	3.09401e-28	macrophage	Gm10699
1.47686e-32	51.3054	0.522	0.424	3.2206e-28	macrophage	Chek2
1.52154e-32	44.8254	0.486	0.392	3.31802e-28	macrophage	Slc39a14
1.56026e-32	23.0425	0.34	0.249	3.40246e-28	macrophage	Zfp568
1.64087e-32	27.5089	0.561	0.481	3.57824e-28	macrophage	Impa2
1.71042e-32	46.2153	0.64	0.531	3.72992e-28	macrophage	Tank
1.79901e-32	17.0845	0.362	0.267	3.9231e-28	macrophage	Naga
2.05742e-32	15.9714	0.468	0.388	4.48661e-28	macrophage	D5Ertd579e
2.09179e-32	56.0772	0.593	0.502	4.56156e-28	macrophage	Sqstm1
2.1899e-32	31.2207	0.448	0.36	4.77552e-28	macrophage	Pon2
2.2265e-32	14.7008	0.381	0.286	4.85533e-28	macrophage	Ctc1
2.41174e-32	37.5994	0.505	0.411	5.25928e-28	macrophage	Ninj1
3.09488e-32	0.553837	0.495	0.395	6.749e-28	macrophage	Slc9a8
3.13762e-32	192.071	0.825	0.746	6.84221e-28	macrophage	Rara
3.37174e-32	148.699	0.385	0.496	7.35276e-28	macrophage	Tox
3.51833e-32	35.2141	0.522	0.437	7.67243e-28	macrophage	Dclre1b
3.5827e-32	46.6682	0.422	0.331	7.8128e-28	macrophage	Meaf6
3.69733e-32	54.9243	0.604	0.508	8.06277e-28	macrophage	Mgrn1
3.9462e-32	23.1846	0.482	0.379	8.60548e-28	macrophage	Batf
5.42756e-32	7.55938	0.347	0.252	1.18359e-27	macrophage	Acta2
5.49424e-32	44.8254	0.315	0.422	1.19813e-27	macrophage	Osbpl10
5.59958e-32	38.2006	0.499	0.403	1.2211e-27	macrophage	Neu1
5.74741e-32	99.6474	0.748	0.653	1.25334e-27	macrophage	Map3k14
6.64495e-32	38.8847	0.471	0.375	1.44906e-27	macrophage	E2f1
7.03875e-32	18.9587	0.419	0.324	1.53494e-27	macrophage	Ctu2
7.40832e-32	16.8369	0.328	0.244	1.61553e-27	macrophage	Timm23
8.79348e-32	5.59909	0.35	0.261	1.91759e-27	macrophage	Coro6
9.67053e-32	71.1038	0.592	0.499	2.10885e-27	macrophage	Slc35a5
1.08938e-31	54.9145	0.553	0.459	2.3756e-27	macrophage	Camkk2
1.09227e-31	14.5971	0.471	0.374	2.38191e-27	macrophage	Gm20479
1.11752e-31	82.9848	0.674	0.595	2.43699e-27	macrophage	Dedd2
1.12973e-31	11.6471	0.479	0.39	2.46361e-27	macrophage	Akt1
1.23649e-31	22.8314	0.369	0.274	2.69642e-27	macrophage	Ushbp1
1.51887e-31	37.0926	0.456	0.362	3.31219e-27	macrophage	Kank3
1.54551e-31	15.9749	0.43	0.337	3.3703e-27	macrophage	Rnf185
1.57847e-31	31.0241	0.508	0.409	3.44216e-27	macrophage	Srd5a3
1.61312e-31	79.4471	0.666	0.567	3.51774e-27	macrophage	Tgif1
1.74675e-31	10.2008	0.531	0.458	3.80913e-27	macrophage	Evl
1.7925e-31	20.3001	0.419	0.325	3.90891e-27	macrophage	Prkra
1.90648e-31	11.8239	0.517	0.421	4.15747e-27	macrophage	Arpc1b
1.99361e-31	18.8569	0.705	0.615	4.34746e-27	macrophage	Rptor
2.00884e-31	31.8441	0.463	0.369	4.38068e-27	macrophage	Slc37a2
2.19562e-31	17.9759	0.268	0.368	4.78799e-27	macrophage	Il2ra
2.23587e-31	17.3633	0.459	0.369	4.87576e-27	macrophage	1600014C10Rik
2.32044e-31	18.8229	0.352	0.262	5.06017e-27	macrophage	Fam187b
2.35956e-31	4.56686	0.332	0.243	5.1455e-27	macrophage	Nim1k
2.55466e-31	67.9065	0.486	0.411	5.57094e-27	macrophage	Ccnd2
2.60404e-31	3.03116	0.256	0.37	5.67862e-27	macrophage	Sdc4
2.67795e-31	2.98728	0.371	0.28	5.83981e-27	macrophage	Fhod3
2.92129e-31	60.4289	0.608	0.513	6.37046e-27	macrophage	Zcchc6
2.9587e-31	43.4344	0.541	0.449	6.45204e-27	macrophage	Arnt
3.06166e-31	57.651	0.566	0.469	6.67655e-27	macrophage	Gm10647
3.11225e-31	26.0505	0.353	0.262	6.78689e-27	macrophage	Senp5
3.26805e-31	14.5988	0.251	0.169	7.12664e-27	macrophage	Il31ra
3.28668e-31	37.7429	0.544	0.456	7.16726e-27	macrophage	Lamtor1
3.29368e-31	51.4111	0.466	0.38	7.18254e-27	macrophage	Lyrm1
3.31197e-31	61.0645	0.277	0.39	7.22242e-27	macrophage	Trp53i11
3.31885e-31	25.1475	0.504	0.409	7.23743e-27	macrophage	Rps21
3.33619e-31	83.6046	0.711	0.618	7.27523e-27	macrophage	Mmd
3.4574e-31	163.126	0.828	0.735	7.53954e-27	macrophage	Bre
3.59693e-31	2.98593	0.398	0.298	7.84384e-27	macrophage	Dnajc15
3.59797e-31	1.32378	0.273	0.188	7.8461e-27	macrophage	Kif19a
3.60033e-31	18.8568	0.419	0.324	7.85124e-27	macrophage	Dfnb59
3.92466e-31	3.31709	0.313	0.225	8.55851e-27	macrophage	Tor1a
3.94553e-31	71.7538	0.651	0.562	8.60402e-27	macrophage	Slc25a28
4.37152e-31	79.4403	0.618	0.511	9.53297e-27	macrophage	Bckdha
4.61639e-31	59.1706	0.531	0.44	1.0067e-26	macrophage	Msmo1
4.7358e-31	112.627	0.655	0.587	1.03274e-26	macrophage	Gm20517
4.96045e-31	167.652	0.777	0.697	1.08172e-26	macrophage	Capzb
4.96852e-31	28.8461	0.327	0.24	1.08348e-26	macrophage	Asl
5.14349e-31	35.834	0.426	0.335	1.12164e-26	macrophage	Zfp326
5.42873e-31	184.304	0.757	0.69	1.18384e-26	macrophage	Diap1
6.02286e-31	87.9476	0.695	0.563	1.31341e-26	macrophage	Ikzf1
6.04992e-31	17.4144	0.431	0.332	1.31931e-26	macrophage	0610040J01Rik
6.15304e-31	67.9079	0.332	0.444	1.34179e-26	macrophage	Camk2b
6.22106e-31	76.3771	0.465	0.377	1.35663e-26	macrophage	Ppp1r13l
6.2541e-31	74.4451	0.571	0.467	1.36383e-26	macrophage	Iscu
7.07706e-31	19.8475	0.537	0.459	1.54329e-26	macrophage	Dstn
7.18768e-31	56.367	0.645	0.565	1.56742e-26	macrophage	Idh1
7.228e-31	66.4659	0.759	0.645	1.57621e-26	macrophage	Fnbp1
7.27322e-31	24.3931	0.495	0.391	1.58607e-26	macrophage	Slc37a4
7.36888e-31	41.6295	0.353	0.261	1.60693e-26	macrophage	Bag3
7.56966e-31	11.7191	0.333	0.242	1.65072e-26	macrophage	Tmem185b
7.83722e-31	80.8923	0.629	0.542	1.70906e-26	macrophage	Ern1
8.41645e-31	22.6394	0.36	0.269	1.83537e-26	macrophage	Mr1
8.73265e-31	17.3944	0.458	0.355	1.90433e-26	macrophage	Mmp9
8.74654e-31	141.486	0.763	0.713	1.90736e-26	macrophage	Snd1
9.76606e-31	27.5399	0.585	0.488	2.12968e-26	macrophage	Slc31a1
1.01424e-30	23.7224	0.42	0.325	2.21175e-26	macrophage	Pdss1
1.10877e-30	36.9917	0.435	0.339	2.41791e-26	macrophage	Tnfrsf1a
1.1909e-30	24.5825	0.521	0.432	2.59699e-26	macrophage	Gclm
1.24245e-30	99.4437	0.681	0.582	2.7094e-26	macrophage	Gnai2
1.26999e-30	37.3684	0.499	0.395	2.76947e-26	macrophage	Klhl6
1.34645e-30	42.9758	0.394	0.303	2.93621e-26	macrophage	Znhit1
1.36154e-30	12.0956	0.5	0.388	2.96912e-26	macrophage	Il1r2
1.42443e-30	105.42	0.775	0.694	3.10625e-26	macrophage	Ttc7
1.49906e-30	82.3238	0.59	0.482	3.26901e-26	macrophage	Pdxk
1.57655e-30	15.9711	0.497	0.406	3.43798e-26	macrophage	Dnajb14
1.63059e-30	36.1753	0.345	0.256	3.55583e-26	macrophage	1700006E09Rik
1.70436e-30	61.1471	0.73	0.659	3.71671e-26	macrophage	Tle3
1.7111e-30	93.1918	0.419	0.527	3.7314e-26	macrophage	Pik3ip1
1.7779e-30	2.80436	0.531	0.444	3.87706e-26	macrophage	Xpot
1.80496e-30	37.4288	0.44	0.535	3.93608e-26	macrophage	Plcg1
1.83362e-30	85.2209	0.412	0.512	3.99857e-26	macrophage	Itgb3
1.9808e-30	51.286	0.58	0.483	4.31953e-26	macrophage	Relt
2.23124e-30	49.2175	0.622	0.537	4.86566e-26	macrophage	Ubp1
2.34806e-30	99.137	0.661	0.578	5.12042e-26	macrophage	Rtn4
2.49382e-30	12.7109	0.484	0.392	5.43826e-26	macrophage	Nmrk1
3.66043e-30	67.7617	0.582	0.496	7.98229e-26	macrophage	Chp1
3.82163e-30	63.9983	0.62	0.534	8.33384e-26	macrophage	Vasp
3.85839e-30	79.4502	0.698	0.624	8.41399e-26	macrophage	Ppm1h
3.92174e-30	88.1067	0.757	0.685	8.55214e-26	macrophage	Klf10
4.12327e-30	36.5611	0.448	0.36	8.99161e-26	macrophage	Slc27a1
4.15589e-30	80.8928	0.774	0.714	9.06274e-26	macrophage	Atxn7l1
4.39641e-30	12.4267	0.269	0.189	9.58725e-26	macrophage	Rpusd3
4.65576e-30	51.5534	0.519	0.431	1.01528e-25	macrophage	Thap4
5.07267e-30	33.4625	0.516	0.424	1.1062e-25	macrophage	Tomt
5.24005e-30	22.5866	0.43	0.34	1.1427e-25	macrophage	Tmem79
5.44389e-30	153.028	0.728	0.669	1.18715e-25	macrophage	Klf7
6.62866e-30	26.7935	0.343	0.253	1.44551e-25	macrophage	Zfp35
6.79611e-30	106.833	0.642	0.55	1.48203e-25	macrophage	Plekhm1
7.01994e-30	49.0509	0.507	0.42	1.53084e-25	macrophage	Ptdss2
7.03894e-30	24.6277	0.666	0.595	1.53498e-25	macrophage	Cd47
7.52834e-30	10.2013	0.474	0.385	1.6417e-25	macrophage	Incenp
8.01325e-30	1.64438	0.485	0.391	1.74745e-25	macrophage	Shkbp1
8.78239e-30	65.9674	0.554	0.457	1.91518e-25	macrophage	Fam96a
9.78658e-30	10.2008	0.647	0.572	2.13416e-25	macrophage	Zfat
9.90506e-30	48.7016	0.686	0.6	2.16e-25	macrophage	Dnm2
1.13423e-29	130.932	0.74	0.695	2.47341e-25	macrophage	Atxn1
1.31549e-29	35.986	0.556	0.47	2.86869e-25	macrophage	Papd5
1.47812e-29	58.7344	0.541	0.451	3.22334e-25	macrophage	Ap3s1
1.47901e-29	24.8071	0.528	0.432	3.22529e-25	macrophage	Mcur1
1.56291e-29	12.7981	0.42	0.338	3.40825e-25	macrophage	Acvr1
1.81199e-29	11.6397	0.288	0.205	3.9514e-25	macrophage	Tmem169
1.98063e-29	56.367	0.597	0.516	4.31917e-25	macrophage	Focad
2.37619e-29	36.1693	0.565	0.452	5.18177e-25	macrophage	Snx20
2.41096e-29	41.9256	0.518	0.433	5.25757e-25	macrophage	Lrrc27
2.52137e-29	30.3987	0.702	0.614	5.49835e-25	macrophage	Acoxl
2.95741e-29	17.7112	0.396	0.302	6.44922e-25	macrophage	Pde6h
3.02819e-29	0.284984	0.369	0.488	6.60356e-25	macrophage	Nck2
3.24081e-29	4.42997	0.574	0.489	7.06723e-25	macrophage	Rcan1
3.28212e-29	114.075	0.738	0.657	7.15732e-25	macrophage	Hivep1
3.35326e-29	36.0483	0.397	0.307	7.31246e-25	macrophage	Dnali1
3.52833e-29	21.7163	0.435	0.344	7.69423e-25	macrophage	Ttc25
4.29538e-29	33.2839	0.428	0.321	9.36693e-25	macrophage	Ly86
4.82912e-29	8.57788	0.329	0.244	1.05309e-24	macrophage	Tbc1d24
5.31489e-29	57.2136	0.574	0.484	1.15902e-24	macrophage	Aph1b
5.38312e-29	26.3115	0.556	0.467	1.1739e-24	macrophage	Arhgap27
5.95251e-29	70.7939	0.598	0.491	1.29806e-24	macrophage	Cerk
6.70619e-29	17.2868	0.37	0.284	1.46242e-24	macrophage	Slc35c2
6.90927e-29	147.255	0.765	0.696	1.50671e-24	macrophage	Zfp652
7.06991e-29	95.3198	0.74	0.667	1.54173e-24	macrophage	Osbpl9
7.21966e-29	10.3706	0.253	0.175	1.57439e-24	macrophage	Slc36a2
7.27968e-29	28.8733	0.437	0.347	1.58748e-24	macrophage	Tfe3
7.70896e-29	66.7515	0.574	0.482	1.68109e-24	macrophage	Arrb2
7.86953e-29	11.332	0.253	0.174	1.71611e-24	macrophage	Accs
8.43712e-29	36.164	0.481	0.395	1.83988e-24	macrophage	Fam102b
8.49885e-29	98.1964	0.577	0.483	1.85334e-24	macrophage	Trim45
9.21068e-29	292.969	0.799	0.707	2.00857e-24	macrophage	Chd7
9.40386e-29	31.7358	0.418	0.329	2.0507e-24	macrophage	Fam53c
9.8019e-29	76.3495	0.631	0.535	2.1375e-24	macrophage	H3f3b
1.02505e-28	135.715	0.775	0.686	2.23532e-24	macrophage	Ssh2
1.05485e-28	88.8704	0.61	0.525	2.30032e-24	macrophage	Gm20604
1.13942e-28	59.3167	0.527	0.438	2.48473e-24	macrophage	Styxl1
1.15981e-28	67.2605	0.615	0.515	2.52919e-24	macrophage	Rnf19b
1.17399e-28	41.9247	0.538	0.451	2.56012e-24	macrophage	Ssbp4
1.20934e-28	21.7423	0.519	0.443	2.6372e-24	macrophage	Ddhd1
1.26968e-28	30.3962	0.553	0.476	2.76878e-24	macrophage	Agps
1.27222e-28	38.778	0.396	0.31	2.77432e-24	macrophage	Rmdn1
1.3095e-28	21.5397	0.466	0.383	2.85562e-24	macrophage	Ctns
1.3566e-28	10.2016	0.487	0.392	2.95834e-24	macrophage	Zc3h18
1.39931e-28	163.531	0.708	0.629	3.05147e-24	macrophage	Pag1
1.53011e-28	19.1046	0.337	0.251	3.33672e-24	macrophage	Neurl2
1.57428e-28	29.2399	0.37	0.286	3.43303e-24	macrophage	Mospd2
1.64284e-28	82.3256	0.656	0.558	3.58253e-24	macrophage	Rbks
1.64555e-28	32.8535	0.41	0.32	3.58845e-24	macrophage	Nhp2
1.64812e-28	21.9596	0.51	0.425	3.59404e-24	macrophage	Sec24a
1.67425e-28	50.2516	0.575	0.491	3.65104e-24	macrophage	Bmf
1.75855e-28	2.97747	0.342	0.262	3.83488e-24	macrophage	Tbca
2.12736e-28	46.2004	0.562	0.479	4.63913e-24	macrophage	3110002H16Rik
2.16075e-28	28.2766	0.49	0.403	4.71194e-24	macrophage	Zfp523
2.1799e-28	26.0699	0.49	0.403	4.7537e-24	macrophage	Zfp609
2.20216e-28	101.218	0.642	0.563	4.80225e-24	macrophage	Gm28051
2.21764e-28	95.0965	0.628	0.536	4.83601e-24	macrophage	Npc2
2.22938e-28	24.6277	0.584	0.515	4.86162e-24	macrophage	Adcy7
2.24736e-28	6.46293	0.437	0.352	4.90082e-24	macrophage	Rtfdc1
2.47637e-28	47.4557	0.554	0.468	5.40023e-24	macrophage	Bad
2.6258e-28	7.3418	0.455	0.365	5.72608e-24	macrophage	Slc25a44
2.87361e-28	13.7971	0.285	0.202	6.26647e-24	macrophage	Gls2
2.9617e-28	9.59561	0.317	0.235	6.45858e-24	macrophage	Nrm
2.98779e-28	92.3419	0.601	0.514	6.51548e-24	macrophage	Kdm4a
3.19993e-28	14.9573	0.46	0.376	6.97809e-24	macrophage	Sowahc
3.35243e-28	33.2734	0.546	0.453	7.31064e-24	macrophage	Src
3.45538e-28	3.01353	0.525	0.437	7.53515e-24	macrophage	Mtmr6
4.17924e-28	180.439	0.277	0.192	9.11367e-24	macrophage	Kazn
4.30408e-28	7.92123	0.307	0.226	9.38591e-24	macrophage	Trmt5
4.48681e-28	33.2765	0.44	0.348	9.78438e-24	macrophage	Zkscan17
4.61935e-28	10.3711	0.264	0.187	1.00734e-23	macrophage	Zfp708
4.8374e-28	5.43304	0.274	0.196	1.05489e-23	macrophage	Snai3
5.15415e-28	19.1286	0.331	0.241	1.12397e-23	macrophage	Pmaip1
5.19226e-28	30.8566	0.544	0.469	1.13228e-23	macrophage	Gins1
5.30421e-28	39.0414	0.433	0.344	1.15669e-23	macrophage	Ece2
6.43184e-28	59.2524	0.6	0.517	1.40259e-23	macrophage	Derl1
6.64049e-28	46.0837	0.459	0.371	1.44809e-23	macrophage	Ikbkap
6.92812e-28	24.1194	0.402	0.313	1.51081e-23	macrophage	Dlst
7.2124e-28	11.5104	0.329	0.244	1.57281e-23	macrophage	Mb21d1
7.33905e-28	33.0182	0.513	0.428	1.60043e-23	macrophage	Dync1h1
7.98375e-28	82.3319	0.664	0.556	1.74102e-23	macrophage	Zdhhc14
8.21935e-28	90.9917	0.787	0.706	1.79239e-23	macrophage	Arid5b
8.27087e-28	24.6313	0.447	0.353	1.80363e-23	macrophage	Klhl5
8.46243e-28	23.1848	0.453	0.372	1.8454e-23	macrophage	Ptplb
9.52453e-28	60.484	0.47	0.392	2.07702e-23	macrophage	3010026O09Rik
9.59962e-28	131.387	0.741	0.664	2.09339e-23	macrophage	B4galt1
9.87264e-28	16.1016	0.422	0.34	2.15293e-23	macrophage	Hmgxb3
1.0794e-27	132.723	0.761	0.699	2.35384e-23	macrophage	Ifrd1
1.09707e-27	71.9476	0.672	0.572	2.39239e-23	macrophage	Sde2
1.14694e-27	11.9117	0.284	0.206	2.50112e-23	macrophage	Adprm
1.29725e-27	10.1351	0.508	0.402	2.82892e-23	macrophage	Smox
1.32155e-27	35.1977	0.474	0.396	2.8819e-23	macrophage	Dhx29
1.32618e-27	26.3711	0.308	0.225	2.892e-23	macrophage	Acvrl1
1.32971e-27	19.8463	0.354	0.271	2.89969e-23	macrophage	Gpalpp1
1.45185e-27	54.4372	0.574	0.488	3.16604e-23	macrophage	Dennd4b
1.59237e-27	1.54459	0.509	0.411	3.47248e-23	macrophage	Nhsl2
1.61123e-27	24.6278	0.433	0.341	3.5136e-23	macrophage	Atp6ap2
1.65427e-27	62.1377	0.552	0.468	3.60747e-23	macrophage	Flna
1.72259e-27	21.2997	0.587	0.51	3.75644e-23	macrophage	Foxn2
1.94101e-27	30.3061	0.43	0.34	4.23276e-23	macrophage	Tmem251
2.01589e-27	44.8219	0.577	0.478	4.39604e-23	macrophage	Elf4
2.04586e-27	17.3438	0.445	0.352	4.46142e-23	macrophage	Preb
2.09627e-27	50.4102	0.366	0.468	4.57134e-23	macrophage	Apobec3
2.12502e-27	70.7939	0.666	0.585	4.63402e-23	macrophage	Znrf1
2.16712e-27	49.1535	0.607	0.527	4.72583e-23	macrophage	Hsd17b12
2.1694e-27	142.929	0.762	0.658	4.73081e-23	macrophage	Rapgef1
2.31051e-27	50.3076	0.484	0.397	5.03853e-23	macrophage	Plin3
2.33687e-27	60.6951	0.678	0.594	5.09602e-23	macrophage	Pgap2
2.34777e-27	17.9136	0.562	0.475	5.11978e-23	macrophage	Igf2r
2.3683e-27	16.076	0.43	0.345	5.16454e-23	macrophage	Zfp62
2.57181e-27	15.9714	0.389	0.301	5.60835e-23	macrophage	Sult2b1
2.58063e-27	37.5366	0.454	0.372	5.62759e-23	macrophage	Pex16
2.80524e-27	51.5821	0.449	0.364	6.11739e-23	macrophage	Thap8
2.98622e-27	20.1237	0.425	0.337	6.51205e-23	macrophage	Nars
3.19285e-27	32.954	0.451	0.367	6.96264e-23	macrophage	Xbp1
3.29126e-27	53.4816	0.37	0.455	7.17724e-23	macrophage	Nsmce1
3.31222e-27	65.9094	0.662	0.587	7.22296e-23	macrophage	Ing3
3.3123e-27	30.3068	0.425	0.336	7.22313e-23	macrophage	Moap1
3.61087e-27	25.4913	0.446	0.361	7.87422e-23	macrophage	Fam46a
3.83052e-27	1.54476	0.403	0.32	8.35322e-23	macrophage	Lsr
3.94631e-27	20.2996	0.356	0.454	8.60571e-23	macrophage	Pitpnm2
3.98379e-27	31.3482	0.484	0.388	8.68744e-23	macrophage	Camta2
4.10034e-27	19.041	0.317	0.419	8.94162e-23	macrophage	Csrp1
4.51514e-27	46.7296	0.499	0.411	9.84617e-23	macrophage	Slc25a39
4.51766e-27	274.214	0.89	0.825	9.85165e-23	macrophage	Sgms1
5.21198e-27	11.4874	0.37	0.284	1.13658e-22	macrophage	Vhl
5.23218e-27	81.241	0.72	0.647	1.14098e-22	macrophage	Skil
5.38104e-27	15.9729	0.501	0.415	1.17344e-22	macrophage	Psmb3
5.39667e-27	71.5169	0.533	0.453	1.17685e-22	macrophage	Shc1
5.6998e-27	27.5353	0.468	0.385	1.24296e-22	macrophage	Fbxo36
5.90188e-27	37.5042	0.499	0.416	1.28702e-22	macrophage	Tm9sf3
6.1748e-27	35.1005	0.506	0.422	1.34654e-22	macrophage	Adrb2
6.32695e-27	20.2988	0.442	0.353	1.37972e-22	macrophage	Nenf
6.44726e-27	19.0428	0.315	0.232	1.40595e-22	macrophage	Anxa7
7.1879e-27	46.0568	0.466	0.378	1.56747e-22	macrophage	Rhbdd3
7.21205e-27	12.5643	0.363	0.277	1.57273e-22	macrophage	Mrpl55
7.29216e-27	41.94	0.301	0.39	1.5902e-22	macrophage	Tspan9
7.45459e-27	31.4954	0.297	0.215	1.62562e-22	macrophage	Slc25a13
7.56165e-27	13.2368	0.254	0.18	1.64897e-22	macrophage	2610001J05Rik
7.71804e-27	54.3376	0.538	0.451	1.68307e-22	macrophage	Denr
7.78626e-27	17.4142	0.372	0.295	1.69795e-22	macrophage	Gars
8.05801e-27	37.4388	0.258	0.371	1.75721e-22	macrophage	Rnf122
8.28732e-27	49.4555	0.59	0.502	1.80722e-22	macrophage	Glud1
9.4763e-27	16.4209	0.353	0.273	2.0665e-22	macrophage	Extl2
9.63436e-27	17.4127	0.386	0.299	2.10096e-22	macrophage	Tifa
1.01301e-26	0.573073	0.268	0.191	2.20907e-22	macrophage	Fbxo22
1.05462e-26	50.5962	0.661	0.563	2.29981e-22	macrophage	Tnfaip3
1.05519e-26	34.8652	0.402	0.314	2.30104e-22	macrophage	Cish
1.13566e-26	20.2996	0.657	0.575	2.47654e-22	macrophage	Notch1
1.21142e-26	40.2559	0.441	0.357	2.64175e-22	macrophage	Ing4
1.26376e-26	26.0704	0.304	0.22	2.75588e-22	macrophage	Hunk
1.27599e-26	36.1688	0.517	0.439	2.78256e-22	macrophage	Me2
1.33405e-26	17.9945	0.408	0.329	2.90917e-22	macrophage	Osbpl11
1.36273e-26	21.5592	0.404	0.311	2.97171e-22	macrophage	Csgalnact1
1.56715e-26	32.5083	0.541	0.462	3.41748e-22	macrophage	Gpx4
1.59982e-26	41.6125	0.428	0.344	3.48873e-22	macrophage	Gpr157
1.70424e-26	19.5288	0.384	0.298	3.71643e-22	macrophage	Fam109b
1.70476e-26	13.0861	0.622	0.54	3.71757e-22	macrophage	D17Wsu92e
1.80031e-26	23.3063	0.425	0.337	3.92594e-22	macrophage	Bin2
1.83609e-26	7.4078	0.35	0.268	4.00396e-22	macrophage	Sav1
1.87281e-26	49.3084	0.55	0.473	4.08405e-22	macrophage	Rhoq
1.99158e-26	24.0143	0.424	0.337	4.34305e-22	macrophage	Ncoa6
2.06631e-26	59.7486	0.628	0.551	4.50599e-22	macrophage	Tom1
2.21313e-26	18.8583	0.525	0.445	4.82617e-22	macrophage	Adnp2
2.21705e-26	67.8986	0.654	0.554	4.83472e-22	macrophage	Myo1c
2.29742e-26	44.7808	0.423	0.341	5.00999e-22	macrophage	Gdap2
2.35077e-26	155.912	0.753	0.677	5.12633e-22	macrophage	Por
2.35193e-26	8.56856	0.303	0.221	5.12885e-22	macrophage	Slc34a1
2.38735e-26	4.24496	0.25	0.175	5.20609e-22	macrophage	Aunip
2.41789e-26	23.8244	0.329	0.247	5.2727e-22	macrophage	Troap
2.70041e-26	79.4501	0.698	0.61	5.88878e-22	macrophage	Nf1
2.85111e-26	20.3793	0.267	0.191	6.21742e-22	macrophage	Psmb5
3.02389e-26	80.8928	0.612	0.543	6.5942e-22	macrophage	Morn1
3.0439e-26	27.4137	0.477	0.391	6.63784e-22	macrophage	Sod2
3.15758e-26	75.122	0.569	0.486	6.88574e-22	macrophage	Cdkn1a
3.20055e-26	21.2099	0.333	0.249	6.97944e-22	macrophage	Babam1
3.25215e-26	66.8174	0.645	0.562	7.09197e-22	macrophage	Zfand5
3.31842e-26	96.7545	0.664	0.598	7.23649e-22	macrophage	Gm28635
3.51575e-26	43.0636	0.456	0.364	7.6668e-22	macrophage	Hps4
3.52445e-26	127.058	0.669	0.562	7.68577e-22	macrophage	Tec
3.56747e-26	15.8563	0.436	0.357	7.77959e-22	macrophage	Naa25
3.66146e-26	18.3973	0.368	0.29	7.98455e-22	macrophage	Stk35
3.77934e-26	11.6433	0.227	0.324	8.2416e-22	macrophage	Hspg2
3.88523e-26	37.5887	0.453	0.37	8.47252e-22	macrophage	Dram2
4.06026e-26	33.0935	0.294	0.399	8.8542e-22	macrophage	Tpm1
4.15028e-26	73.6776	0.622	0.544	9.05051e-22	macrophage	Brca1
4.40706e-26	136.337	0.686	0.61	9.61047e-22	macrophage	Alcam
4.81695e-26	19.6855	0.345	0.263	1.05043e-21	macrophage	Nat6
4.86357e-26	69.792	0.382	0.292	1.0606e-21	macrophage	Meis1
4.89272e-26	2.99085	0.414	0.324	1.06696e-21	macrophage	Npepps
5.08916e-26	23.185	0.37	0.284	1.10979e-21	macrophage	Slc24a4
5.42919e-26	43.2352	0.472	0.391	1.18394e-21	macrophage	Trafd1
5.63913e-26	25.3786	0.343	0.261	1.22972e-21	macrophage	Tmco1
5.70119e-26	52.982	0.556	0.471	1.24326e-21	macrophage	Gm20695
5.7814e-26	88.0779	0.669	0.585	1.26075e-21	macrophage	Bbc3
5.84067e-26	113.846	0.456	0.545	1.27367e-21	macrophage	Katnal1
5.92828e-26	70.8353	0.618	0.529	1.29278e-21	macrophage	Med29
5.95838e-26	78.7687	0.599	0.513	1.29934e-21	macrophage	Gm10382
6.00441e-26	27.5131	0.483	0.411	1.30938e-21	macrophage	Arfip1
6.17602e-26	22.9385	0.346	0.264	1.3468e-21	macrophage	Hyal1
6.3155e-26	30.3688	0.578	0.494	1.37722e-21	macrophage	Mtmr3
6.3566e-26	4.42997	0.701	0.625	1.38618e-21	macrophage	Ccdc146
6.419e-26	52.0324	0.568	0.45	1.39979e-21	macrophage	5031414D18Rik
6.42838e-26	23.185	0.531	0.443	1.40184e-21	macrophage	Tmem2
6.59562e-26	25.2626	0.297	0.219	1.43831e-21	macrophage	Rnf135
7.40822e-26	1.5446	0.529	0.442	1.61551e-21	macrophage	Grhl1
7.67607e-26	39.211	0.454	0.369	1.67392e-21	macrophage	Cdt1
7.85171e-26	46.7679	0.652	0.575	1.71222e-21	macrophage	Trim41
8.06965e-26	26.0705	0.523	0.427	1.75975e-21	macrophage	Fam178a
9.334e-26	51.8473	0.589	0.505	2.03546e-21	macrophage	Cpeb4
9.97864e-26	2.98728	0.441	0.363	2.17604e-21	macrophage	Pex14
1.0073e-25	47.2556	0.451	0.369	2.19661e-21	macrophage	Zfp385a
1.04668e-25	54.4692	0.57	0.485	2.2825e-21	macrophage	Chst12
1.05169e-25	41.9399	0.414	0.498	2.29343e-21	macrophage	Akt3
1.07844e-25	213.619	0.64	0.698	2.35174e-21	macrophage	Cblb
1.10195e-25	49.5786	0.469	0.386	2.40303e-21	macrophage	Tfcp2
1.16795e-25	10.2736	0.359	0.281	2.54696e-21	macrophage	Ifih1
1.23435e-25	56.2828	0.282	0.379	2.69174e-21	macrophage	Gpr132
1.24875e-25	102.707	0.682	0.608	2.72314e-21	macrophage	Cryzl1
1.31601e-25	60.66	0.513	0.421	2.86982e-21	macrophage	Dcaf12
1.54883e-25	83.7711	0.625	0.544	3.37753e-21	macrophage	Rhbdf2
1.60096e-25	38.9744	0.374	0.288	3.49122e-21	macrophage	Cd81
1.6252e-25	41.7871	0.449	0.367	3.54407e-21	macrophage	Asah1
1.70232e-25	26.0703	0.452	0.383	3.71226e-21	macrophage	Farp2
1.739e-25	67.3813	0.556	0.479	3.79224e-21	macrophage	Leprot
1.8303e-25	72.1572	0.309	0.405	3.99133e-21	macrophage	Cd247
2.14703e-25	85.2173	0.313	0.233	4.68203e-21	macrophage	Fbxl2
2.28242e-25	12.4347	0.4	0.313	4.97728e-21	macrophage	Mfsd6
2.33219e-25	43.1221	0.536	0.443	5.08581e-21	macrophage	B2m
2.55234e-25	10.198	0.343	0.264	5.5659e-21	macrophage	B4galt3
2.65321e-25	74.9219	0.639	0.554	5.78586e-21	macrophage	Actr2
2.89654e-25	54.0837	0.455	0.369	6.31647e-21	macrophage	Ankzf1
2.92836e-25	25.0812	0.386	0.304	6.38588e-21	macrophage	Sat1
2.96544e-25	67.0191	0.226	0.322	6.46673e-21	macrophage	Tenc1
3.00462e-25	33.9339	0.557	0.475	6.55217e-21	macrophage	Lhpp
3.05194e-25	43.3824	0.521	0.422	6.65536e-21	macrophage	Tbc1d8
3.39978e-25	26.0704	0.523	0.443	7.41389e-21	macrophage	Fdft1
3.46993e-25	43.3827	0.706	0.629	7.56688e-21	macrophage	Sp2
3.47956e-25	47.7108	0.343	0.268	7.58787e-21	macrophage	Dpy19l4
3.51393e-25	79.4501	0.496	0.42	7.66283e-21	macrophage	Synpo
3.61221e-25	72.2366	0.658	0.524	7.87714e-21	macrophage	Laptm5
3.64484e-25	14.9874	0.47	0.383	7.94831e-21	macrophage	Spon1
3.70597e-25	47.6074	0.55	0.456	8.08162e-21	macrophage	Got1
3.75675e-25	13.091	0.381	0.3	8.19234e-21	macrophage	Cdadc1
3.94854e-25	76.2432	0.672	0.592	8.61057e-21	macrophage	Mms19
4.20659e-25	63.515	0.562	0.489	9.17331e-21	macrophage	Cd164
4.24661e-25	60.2352	0.547	0.466	9.26058e-21	macrophage	Pik3r2
4.40986e-25	200.636	0.509	0.416	9.61657e-21	macrophage	Gabbr2
4.50443e-25	50.6033	0.505	0.421	9.82281e-21	macrophage	Oxnad1
4.88168e-25	17.5164	0.326	0.247	1.06455e-20	macrophage	Shfm1
5.25679e-25	37.5747	0.245	0.338	1.14635e-20	macrophage	Irs1
5.31599e-25	59.24	0.622	0.539	1.15926e-20	macrophage	Smdt1
5.36288e-25	46.1713	0.504	0.404	1.16948e-20	macrophage	Abi3
6.08556e-25	17.4157	0.392	0.314	1.32708e-20	macrophage	Fndc7
6.41269e-25	34.7252	0.575	0.468	1.39842e-20	macrophage	Cxcr4
6.61346e-25	88.1063	0.769	0.681	1.4422e-20	macrophage	Tbc1d1
6.63925e-25	30.9764	0.495	0.423	1.44782e-20	macrophage	Carhsp1
6.64347e-25	54.6461	0.551	0.471	1.44874e-20	macrophage	Rnf13
6.99057e-25	11.1951	0.29	0.213	1.52443e-20	macrophage	Gpn1
7.14691e-25	9.96714	0.274	0.198	1.55853e-20	macrophage	Tsks
7.25622e-25	8.55887	0.322	0.243	1.58236e-20	macrophage	Dhps
7.54702e-25	18.8132	0.324	0.245	1.64578e-20	macrophage	Dhrs1
8.67587e-25	251.127	0.821	0.756	1.89195e-20	macrophage	Mnt
8.73104e-25	42.8906	0.517	0.437	1.90398e-20	macrophage	2810474O19Rik
9.30211e-25	17.2069	0.437	0.352	2.02851e-20	macrophage	Hat1
9.54667e-25	15.3624	0.33	0.248	2.08184e-20	macrophage	Ppm1m
1.0103e-24	49.1498	0.54	0.457	2.20316e-20	macrophage	Hagh
1.11146e-24	16.9623	0.222	0.314	2.42376e-20	macrophage	Rasal1
1.16147e-24	40.6257	0.476	0.384	2.53281e-20	macrophage	Lfng
1.1616e-24	37.6425	0.553	0.48	2.5331e-20	macrophage	Stard5
1.17887e-24	5.87267	0.592	0.507	2.57076e-20	macrophage	Cfap54
1.19932e-24	5.94272	0.254	0.179	2.61536e-20	macrophage	Syt7
1.34729e-24	13.7547	0.432	0.354	2.93803e-20	macrophage	Itm2b
1.38505e-24	4.41728	0.327	0.247	3.02037e-20	macrophage	Grina
1.4558e-24	13.6805	0.31	0.234	3.17467e-20	macrophage	Stx16
1.4637e-24	11.6412	0.305	0.23	3.1919e-20	macrophage	Lipt2
1.47783e-24	7.3187	0.342	0.263	3.22271e-20	macrophage	Naglu
1.55071e-24	18.8731	0.359	0.28	3.38163e-20	macrophage	Vipr1
1.58244e-24	60.1734	0.566	0.477	3.45082e-20	macrophage	Nfkbil1
1.5866e-24	112.629	0.699	0.618	3.45989e-20	macrophage	Fam72a
1.59494e-24	37.3743	0.493	0.407	3.47808e-20	macrophage	Vdac2
1.59899e-24	24.5186	0.476	0.393	3.48691e-20	macrophage	Stub1
1.60688e-24	31.8404	0.588	0.5	3.50411e-20	macrophage	Herpud2
1.72647e-24	39.7969	0.514	0.433	3.76491e-20	macrophage	Rbm14
1.78161e-24	14.9372	0.352	0.27	3.88516e-20	macrophage	Sh3bgrl3
1.82681e-24	38.9821	0.451	0.367	3.98373e-20	macrophage	Rgs10
1.97053e-24	93.8771	0.705	0.645	4.29714e-20	macrophage	Sept9
2.21465e-24	25.6181	0.428	0.347	4.82948e-20	macrophage	Med24
2.34417e-24	24.3551	0.54	0.463	5.11194e-20	macrophage	Senp2
2.36338e-24	6.10857	0.262	0.189	5.15383e-20	macrophage	2410016O06Rik
2.37138e-24	20.0543	0.393	0.313	5.17126e-20	macrophage	Zfp715
2.40052e-24	16.5397	0.494	0.406	5.23482e-20	macrophage	Slc25a33
2.41714e-24	145.814	0.667	0.584	5.27105e-20	macrophage	Rftn1
2.42237e-24	12.5249	0.378	0.296	5.28246e-20	macrophage	Syngr2
2.50339e-24	95.5137	0.654	0.591	5.45913e-20	macrophage	Vkorc1l1
2.63697e-24	82.335	0.43	0.358	5.75045e-20	macrophage	Mkl2
2.9248e-24	200.636	0.762	0.629	6.37811e-20	macrophage	Fli1
2.93816e-24	7.31591	0.675	0.61	6.40726e-20	macrophage	Gramd1b
2.99087e-24	21.8396	0.384	0.303	6.52218e-20	macrophage	Slc26a6
3.10851e-24	45.2892	0.452	0.37	6.77872e-20	macrophage	Gnai3
3.14973e-24	50.1997	0.347	0.44	6.86862e-20	macrophage	Kctd10
3.26385e-24	3.42527	0.288	0.212	7.11748e-20	macrophage	Becn1
3.26772e-24	31.2741	0.42	0.335	7.12592e-20	macrophage	Wdr83
3.32873e-24	23.1863	0.552	0.463	7.25896e-20	macrophage	Ap1g1
3.43541e-24	10.6724	0.357	0.281	7.49159e-20	macrophage	Gm9920
3.50659e-24	72.2366	0.701	0.599	7.64682e-20	macrophage	Plekha2
3.52254e-24	15.3154	0.325	0.247	7.6816e-20	macrophage	Rap2c
3.58971e-24	45.6286	0.545	0.46	7.82808e-20	macrophage	Nucb2
3.80925e-24	3.46597	0.426	0.34	8.30682e-20	macrophage	Ntng2
4.25409e-24	17.2289	0.355	0.275	9.2769e-20	macrophage	Acad8
4.31321e-24	2.97094	0.509	0.422	9.40581e-20	macrophage	Rnf115
4.58051e-24	8.82822	0.341	0.435	9.98872e-20	macrophage	Itpr3
5.12191e-24	47.707	0.607	0.537	1.11693e-19	macrophage	Top1
5.15884e-24	86.5806	0.647	0.569	1.12499e-19	macrophage	Nbr1
5.25952e-24	30.2411	0.407	0.322	1.14694e-19	macrophage	Kctd11
5.57125e-24	21.881	0.387	0.309	1.21492e-19	macrophage	Arfgap3
6.26073e-24	9.72175	0.25	0.179	1.36528e-19	macrophage	Stac2
6.39818e-24	8.76643	0.463	0.383	1.39525e-19	macrophage	Rassf8
6.82258e-24	26.2438	0.404	0.328	1.4878e-19	macrophage	Trim36
7.35101e-24	8.80863	0.313	0.237	1.60303e-19	macrophage	Rp2h
7.92397e-24	41.3288	0.491	0.414	1.72798e-19	macrophage	Atf1
8.41026e-24	32.0269	0.419	0.338	1.83402e-19	macrophage	Zfp719
8.51505e-24	41.4133	0.585	0.503	1.85688e-19	macrophage	Osbpl2
8.97828e-24	76.5647	0.478	0.403	1.95789e-19	macrophage	Sos2
9.79446e-24	143.371	0.275	0.203	2.13588e-19	macrophage	Pappa
9.8009e-24	77.9811	0.671	0.598	2.13728e-19	macrophage	Mrpl48
1.02038e-23	18.004	0.435	0.35	2.22515e-19	macrophage	Cpsf2
1.03752e-23	71.8189	0.591	0.511	2.26251e-19	macrophage	E2f2
1.06921e-23	67.9027	0.576	0.494	2.33162e-19	macrophage	Ap3m1
1.09369e-23	17.3845	0.466	0.381	2.38501e-19	macrophage	Mgat2
1.11098e-23	40.5034	0.584	0.518	2.42271e-19	macrophage	Lrrc28
1.20289e-23	27.5131	0.56	0.478	2.62315e-19	macrophage	Wwp2
1.22765e-23	74.9387	0.238	0.324	2.67715e-19	macrophage	Chst3
1.2316e-23	50.5962	0.688	0.616	2.68575e-19	macrophage	Cdyl
1.28326e-23	26.9072	0.532	0.447	2.79841e-19	macrophage	Pitpnm1
1.39603e-23	102.889	0.657	0.582	3.04433e-19	macrophage	Cds2
1.43667e-23	62.125	0.599	0.534	3.13294e-19	macrophage	Sh3glb1
1.49602e-23	15.5415	0.555	0.482	3.26237e-19	macrophage	Ssfa2
1.50446e-23	27.9629	0.485	0.406	3.28077e-19	macrophage	Cdc6
1.54799e-23	26.0692	0.48	0.395	3.3757e-19	macrophage	Tnip2
1.55181e-23	5.70207	0.374	0.298	3.38403e-19	macrophage	Hadha
1.77564e-23	46.2681	0.274	0.197	3.87215e-19	macrophage	Svep1
1.90536e-23	13.0525	0.338	0.26	4.15502e-19	macrophage	Catsperg1
2.16377e-23	7.51916	0.308	0.233	4.71854e-19	macrophage	Itm2c
2.17553e-23	41.204	0.465	0.38	4.74418e-19	macrophage	Prdx5
2.20741e-23	15.9817	0.395	0.321	4.8137e-19	macrophage	Pbxip1
2.25328e-23	1.80713	0.399	0.318	4.91372e-19	macrophage	Stard3
2.25633e-23	16.1009	0.273	0.2	4.92037e-19	macrophage	Agtrap
2.25837e-23	53.8855	0.623	0.55	4.92483e-19	macrophage	Ptpn2
2.26328e-23	20.3631	0.36	0.283	4.93553e-19	macrophage	Api5
2.3608e-23	60.6864	0.668	0.585	5.14819e-19	macrophage	Rmnd5a
2.41562e-23	20.3004	0.342	0.26	5.26775e-19	macrophage	Fbxo28
2.49845e-23	61.5612	0.577	0.487	5.44836e-19	macrophage	Rgs2
2.5024e-23	34.7167	0.566	0.503	5.45699e-19	macrophage	Parp8
2.58957e-23	58.9267	0.567	0.487	5.64709e-19	macrophage	Dgat1
2.60785e-23	16.1243	0.42	0.343	5.68694e-19	macrophage	Mical1
2.62699e-23	1.89787	0.299	0.227	5.72867e-19	macrophage	Tcea2
2.71444e-23	42.5374	0.582	0.506	5.91937e-19	macrophage	Fam35a
2.74975e-23	21.2573	0.313	0.237	5.99638e-19	macrophage	Nfu1
2.86862e-23	53.3407	0.496	0.418	6.2556e-19	macrophage	Ndufs8
2.90796e-23	9.27754	0.412	0.332	6.34139e-19	macrophage	Gosr2
2.93511e-23	16.9607	0.29	0.215	6.40059e-19	macrophage	Ms4a15
3.00469e-23	1.54465	0.305	0.232	6.55233e-19	macrophage	Ift88
3.10543e-23	20.2996	0.499	0.423	6.77201e-19	macrophage	Usp47
3.30401e-23	38.3664	0.28	0.378	7.20506e-19	macrophage	Pank1
3.39329e-23	19.0735	0.364	0.288	7.39976e-19	macrophage	Mlycd
3.43312e-23	27.7563	0.522	0.434	7.4866e-19	macrophage	Il10rb
3.46643e-23	36.0854	0.486	0.407	7.55925e-19	macrophage	Zfp513
3.59119e-23	50.57	0.614	0.539	7.83131e-19	macrophage	Nrd1
3.65612e-23	31.3624	0.302	0.391	7.97291e-19	macrophage	Pear1
3.67033e-23	49.1499	0.68	0.615	8.00388e-19	macrophage	Banp
3.82208e-23	11.4711	0.26	0.189	8.3348e-19	macrophage	G6pc3
4.03728e-23	44.769	0.451	0.365	8.8041e-19	macrophage	BC028528
4.064e-23	78.6668	0.626	0.553	8.86236e-19	macrophage	Nr2c2
4.14306e-23	223.72	0.311	0.406	9.03478e-19	macrophage	Palm2
4.15748e-23	78.7881	0.581	0.509	9.06622e-19	macrophage	Psme2
4.17875e-23	34.1533	0.394	0.318	9.1126e-19	macrophage	Pex2
4.18871e-23	10.214	0.302	0.398	9.13433e-19	macrophage	Armc2
4.38445e-23	39.0531	0.515	0.433	9.56116e-19	macrophage	Fahd1
4.40836e-23	62.1378	0.537	0.606	9.61332e-19	macrophage	Zhx2
4.58299e-23	27.0334	0.294	0.221	9.99413e-19	macrophage	Pet117
4.94578e-23	37.6132	0.571	0.491	1.07853e-18	macrophage	Nck1
5.02415e-23	49.1632	0.651	0.612	1.09562e-18	macrophage	Tmem135
5.09854e-23	8.82386	0.303	0.23	1.11184e-18	macrophage	Lrrc59
5.20484e-23	19.1884	0.365	0.288	1.13502e-18	macrophage	Tmem138
5.26834e-23	85.51	0.656	0.575	1.14887e-18	macrophage	Usp22
5.90915e-23	26.1654	0.535	0.439	1.28861e-18	macrophage	Slc15a4
6.07315e-23	47.6407	0.603	0.516	1.32437e-18	macrophage	9030617O03Rik
6.95331e-23	18.87	0.231	0.328	1.51631e-18	macrophage	Prr5
7.78511e-23	15.9715	0.403	0.325	1.6977e-18	macrophage	Dync1li1
7.95787e-23	25.515	0.347	0.273	1.73537e-18	macrophage	Gpx1
7.96864e-23	45.9554	0.281	0.211	1.73772e-18	macrophage	Gtf2h2
8.27687e-23	58.8061	0.528	0.445	1.80494e-18	macrophage	Plxnd1
8.33363e-23	102.451	0.725	0.647	1.81731e-18	macrophage	Mgat5
8.70114e-23	5.87398	0.603	0.528	1.89746e-18	macrophage	Il4ra
8.71725e-23	10.3496	0.297	0.223	1.90097e-18	macrophage	Spn
8.99339e-23	9.97543	0.3	0.227	1.96119e-18	macrophage	Polr2g
9.60383e-23	1.55409	0.495	0.415	2.09431e-18	macrophage	Dtd1
9.64936e-23	186.026	0.751	0.67	2.10424e-18	macrophage	Dip2b
1.05132e-22	37.612	0.614	0.546	2.29261e-18	macrophage	Lpcat3
1.05857e-22	13.298	0.3	0.225	2.30841e-18	macrophage	Aprt
1.16092e-22	5.87267	0.392	0.48	2.53163e-18	macrophage	Zhx3
1.17497e-22	49.0828	0.596	0.519	2.56225e-18	macrophage	Spop
1.1763e-22	49.1258	0.571	0.51	2.56516e-18	macrophage	Rock2
1.30685e-22	141.301	0.802	0.704	2.84986e-18	macrophage	Fam49b
1.32391e-22	66.37	0.552	0.479	2.88705e-18	macrophage	Fam219a
1.32937e-22	22.9248	0.522	0.45	2.89895e-18	macrophage	Rab5c
1.33011e-22	37.4294	0.359	0.461	2.90057e-18	macrophage	Clec11a
1.33849e-22	47.7282	0.496	0.416	2.91884e-18	macrophage	Pxmp4
1.3794e-22	34.2485	0.373	0.297	3.00805e-18	macrophage	Gm1661
1.41613e-22	59.2524	0.65	0.569	3.08815e-18	macrophage	Ctdp1
1.4168e-22	8.75901	0.337	0.262	3.08962e-18	macrophage	Xiap
1.4207e-22	20.4349	0.337	0.259	3.09812e-18	macrophage	Paqr7
1.48617e-22	48.6418	0.459	0.381	3.24089e-18	macrophage	Ddx26b
1.54799e-22	1.073	0.305	0.232	3.3757e-18	macrophage	Lsmem1
1.54837e-22	1.98697	0.444	0.366	3.37652e-18	macrophage	Usp8
1.60548e-22	79.0279	0.423	0.511	3.50108e-18	macrophage	Cables1
1.7111e-22	70.9629	0.629	0.554	3.73139e-18	macrophage	Naa50
1.79612e-22	26.041	0.469	0.392	3.9168e-18	macrophage	Gzf1
1.89227e-22	89.0162	0.645	0.568	4.12647e-18	macrophage	Acap2
1.95998e-22	49.1264	0.459	0.385	4.27413e-18	macrophage	Fis1
2.03118e-22	18.9304	0.585	0.505	4.42939e-18	macrophage	Nufip2
2.08552e-22	57.3143	0.624	0.548	4.54789e-18	macrophage	Tapbp
2.10764e-22	7.33478	0.382	0.305	4.59612e-18	macrophage	Mkrn1
2.11205e-22	108.304	0.639	0.607	4.60574e-18	macrophage	Ext1
2.20994e-22	34.8234	0.281	0.211	4.81921e-18	macrophage	Eif6
2.2337e-22	90.4631	0.43	0.355	4.87103e-18	macrophage	R3hcc1l
2.24874e-22	70.3164	0.522	0.449	4.90382e-18	macrophage	Rpia
2.31107e-22	15.5473	0.299	0.221	5.03976e-18	macrophage	Xkr8
2.50141e-22	27.4856	0.422	0.341	5.45482e-18	macrophage	Vps4b
2.53917e-22	137.153	0.631	0.574	5.53716e-18	macrophage	A930011G23Rik
2.71475e-22	131.387	0.537	0.476	5.92006e-18	macrophage	Slc44a1
3.06066e-22	83.5935	0.558	0.476	6.67438e-18	macrophage	Obfc1
3.15016e-22	47.5747	0.534	0.459	6.86956e-18	macrophage	Eif4b
3.17201e-22	30.0125	0.426	0.346	6.91721e-18	macrophage	Wdr45b
3.43483e-22	37.5252	0.539	0.462	7.49034e-18	macrophage	Ap4m1
3.50414e-22	24.8172	0.391	0.315	7.64149e-18	macrophage	Plagl2
3.5397e-22	1.36172	0.444	0.37	7.71901e-18	macrophage	Necap1
3.57629e-22	39.2558	0.554	0.475	7.79882e-18	macrophage	Fam192a
3.72768e-22	88.0135	0.322	0.401	8.12895e-18	macrophage	Padi2
3.78129e-22	45.7915	0.599	0.52	8.24587e-18	macrophage	Arpc2
4.21243e-22	4.42983	0.45	0.372	9.18604e-18	macrophage	Plbd1
4.32402e-22	18.8569	0.542	0.469	9.42938e-18	macrophage	Adam17
4.64753e-22	19.9582	0.394	0.314	1.01349e-17	macrophage	Zswim8
4.94079e-22	2.97756	0.204	0.287	1.07744e-17	macrophage	Btla
5.02342e-22	22.3385	0.354	0.279	1.09546e-17	macrophage	Aste1
5.47653e-22	29.705	0.346	0.27	1.19427e-17	macrophage	Dctn5
5.6083e-22	37.4531	0.434	0.361	1.223e-17	macrophage	Nagk
5.64992e-22	20.1173	0.242	0.334	1.23208e-17	macrophage	Crip2
5.65325e-22	49.2657	0.567	0.495	1.2328e-17	macrophage	Cry1
5.9343e-22	73.6885	0.735	0.652	1.29409e-17	macrophage	Map3k3
5.9696e-22	14.555	0.443	0.361	1.30179e-17	macrophage	Ccdc63
6.33664e-22	26.5813	0.336	0.42	1.38183e-17	macrophage	Mllt6
7.24867e-22	28.9558	0.62	0.475	1.58072e-17	macrophage	Cd74
7.66642e-22	19.4006	0.351	0.277	1.67182e-17	macrophage	Hyal3
8.17937e-22	4.35988	0.532	0.445	1.78367e-17	macrophage	Gng2
8.84307e-22	39.9967	0.453	0.371	1.92841e-17	macrophage	Trmt112
8.89493e-22	4.36006	0.417	0.339	1.93972e-17	macrophage	Armc7
9.04703e-22	28.9288	0.374	0.467	1.97289e-17	macrophage	Fasn
9.39901e-22	20.3217	0.408	0.334	2.04964e-17	macrophage	Tmem140
9.67677e-22	18.4756	0.375	0.297	2.11021e-17	macrophage	Stk16
9.95645e-22	75.0492	0.581	0.5	2.1712e-17	macrophage	Ddias
1.05272e-21	51.0476	0.642	0.55	2.29567e-17	macrophage	Dido1
1.08134e-21	54.8646	0.597	0.511	2.35807e-17	macrophage	Tgfb1
1.11776e-21	19.1504	0.381	0.308	2.4375e-17	macrophage	Nipa2
1.16391e-21	3.44893	0.507	0.434	2.53814e-17	macrophage	Hps3
1.18762e-21	39.4371	0.567	0.493	2.58985e-17	macrophage	Rprd1b
1.18934e-21	27.9194	0.349	0.277	2.5936e-17	macrophage	Rab19
1.20608e-21	18.8569	0.59	0.528	2.6301e-17	macrophage	Dhcr7
1.26227e-21	23.3268	0.408	0.33	2.75264e-17	macrophage	Galnt11
1.27481e-21	38.6218	0.5	0.42	2.77998e-17	macrophage	Cks2
1.30735e-21	17.297	0.33	0.255	2.85094e-17	macrophage	Nop9
1.30909e-21	54.7388	0.569	0.494	2.85473e-17	macrophage	M6pr
1.30954e-21	33.2839	0.567	0.495	2.85571e-17	macrophage	Aebp2
1.3435e-21	108.303	0.718	0.642	2.92978e-17	macrophage	Zbtb7a
1.48168e-21	18.0066	0.214	0.302	3.23111e-17	macrophage	Cyp46a1
1.51652e-21	60.5413	0.497	0.417	3.30708e-17	macrophage	Odf2
1.54437e-21	17.3846	0.462	0.38	3.3678e-17	macrophage	Rpl36al
1.54721e-21	59.151	0.545	0.47	3.37399e-17	macrophage	Pigl
1.5532e-21	47.7108	0.597	0.523	3.38706e-17	macrophage	Igsf8
1.66245e-21	15.9716	0.451	0.378	3.62531e-17	macrophage	Rpa2
1.67253e-21	45.8158	0.317	0.42	3.64729e-17	macrophage	Rnf125
1.69057e-21	12.1745	0.281	0.212	3.68662e-17	macrophage	Mrps15
1.77778e-21	67.9086	0.601	0.533	3.87681e-17	macrophage	Hmbox1
1.82649e-21	64.8437	0.622	0.549	3.98302e-17	macrophage	Lpin2
2.12549e-21	2.98728	0.456	0.383	4.63505e-17	macrophage	Slc30a7
2.13309e-21	33.6878	0.471	0.392	4.65162e-17	macrophage	Btf3l4
2.21311e-21	23.1845	0.538	0.458	4.82612e-17	macrophage	Tcf20
2.22773e-21	25.6032	0.374	0.299	4.858e-17	macrophage	Rpl14
2.24873e-21	11.4285	0.342	0.267	4.90381e-17	macrophage	Gba2
2.26371e-21	30.6744	0.488	0.41	4.93647e-17	macrophage	Nup88
2.27206e-21	134.269	0.706	0.639	4.95467e-17	macrophage	Irf2bp2
2.57183e-21	45.8214	0.627	0.547	5.60839e-17	macrophage	Lrif1
2.61217e-21	63.2798	0.463	0.39	5.69636e-17	macrophage	Nme1
2.68866e-21	40.827	0.588	0.523	5.86316e-17	macrophage	Cdk2ap2
2.77608e-21	43.4528	0.513	0.438	6.05381e-17	macrophage	Tspan5
2.78668e-21	69.2472	0.512	0.437	6.07691e-17	macrophage	Ikbkg
3.02245e-21	5.95813	0.186	0.268	6.59105e-17	macrophage	Ret
3.06794e-21	33.2284	0.543	0.471	6.69025e-17	macrophage	Dck
3.08964e-21	19.2035	0.328	0.255	6.73758e-17	macrophage	Sytl3
3.10112e-21	28.5379	0.442	0.366	6.76262e-17	macrophage	Cdc123
3.10406e-21	48.1344	0.554	0.489	6.76902e-17	macrophage	Zfp526
3.18659e-21	82.9785	0.68	0.599	6.94899e-17	macrophage	Zfp36l2
3.28918e-21	15.9715	0.335	0.264	7.17272e-17	macrophage	Zfp64
3.31814e-21	28.5052	0.368	0.298	7.23587e-17	macrophage	Ccdc117
3.40196e-21	34.2361	0.454	0.529	7.41866e-17	macrophage	Hip1r
3.7551e-21	26.6883	0.233	0.324	8.18874e-17	macrophage	Dut
[truncated: 7,626 more rows]
