# Supplementary material for: Single-cell multiomics reveals endothelial mechanosensitive PIEZO1 coupling IL-33 regulates the development of pulmonary fibrosis
Source: Research Square preprint supplement (doi:10.21203/rs.3.rs-4861689/v1), 2024-09-06
Supplement: Supplementary file 12 [file Table S8.xlsx]

## Sheet: Sheet 1
	p_val	avg_log2FC	pct.1	pct.2	p_val_adj	tx_id	gene_name	gene_id	gene_biotype	type	closest_region	query_region	distance
chr18-60668874-60669972	3.93284e-30	0.526961	0.313	0.062	7.95664e-25	ENSMUST00000137894	Synpo	ENSMUSG00000043079	protein_coding	exon	chr18-60660102-60660142	chr18-60668874-60669972	8731
chr1-119233834-119234792	1.40746e-29	0.542061	0.266	0.028	2.84747e-24	ENSMUST00000189894	Gm29456	ENSMUSG00000099860	lincRNA	exon	chr1-119305346-119305675	chr1-119233834-119234792	70553
chr10-77211006-77211838	2.31545e-28	0.520227	0.336	0.08	4.68446e-23	ENSMUST00000081654	Col18a1	ENSMUSG00000001435	protein_coding	exon	chr10-77166439-77166548	chr10-77211006-77211838	44457
chr5-31575979-31577117	7.2351e-25	0.478885	0.24	0.039	1.46375e-19	ENSMUST00000142345	Mrpl33	ENSMUSG00000029142	protein_coding	exon	chr5-31596935-31597021	chr5-31575979-31577117	19817
chr11-95402388-95403100	3.87909e-23	0.477695	0.214	0.025	7.8479e-18	ENSMUST00000131193	Slc35b1	ENSMUSG00000020873	protein_coding	utr	chr11-95391488-95391776	chr11-95402388-95403100	10611
chr10-44518511-44519120	7.56727e-23	0.447275	0.165	0.01	1.53096e-17	ENSMUST00000167340	Prdm1	ENSMUSG00000038151	protein_coding	gap	chr10-44456871-44528365	chr10-44518511-44519120	0
chr12-4004716-4005026	1.12799e-22	0.419949	0.147	0.01	2.28208e-17	ENSMUST00000111178	Efr3b	ENSMUSG00000020658	protein_coding	gap	chr12-4000957-4038703	chr12-4004716-4005026	0
chr11-8579615-8580211	5.19027e-22	0.416797	0.152	0.015	1.05006e-16	ENSMUST00000020695	Tns3	ENSMUSG00000020422	protein_coding	gap	chr11-8579122-8600554	chr11-8579615-8580211	0
chr18-63463288-63463898	9.21331e-22	0.43309	0.183	0.025	1.86397e-16	ENSMUST00000183218	Gm26972	ENSMUSG00000097980	lincRNA	exon	chr18-63421082-63421197	chr18-63463288-63463898	42090
chr13-114734742-114735461	1.35876e-21	0.428367	0.183	0.017	2.74896e-16	ENSMUST00000181553	4930544M13Rik	ENSMUSG00000051758	lincRNA	exon	chr13-114697647-114697822	chr13-114734742-114735461	36919
chr13-36695603-36696659	2.13082e-21	0.451822	0.235	0.039	4.31092e-16	ENSMUST00000037623	Nrn1	ENSMUSG00000039114	protein_coding	utr	chr13-36725625-36726627	chr13-36695603-36696659	28965
chr9-32816400-32817114	3.08666e-21	0.413932	0.163	0.016	6.24472e-16	ENSMUST00000183423	Gm3331	ENSMUSG00000099148	lincRNA	gap	chr9-32813860-32833213	chr9-32816400-32817114	0
chr12-79796191-79797433	3.8024e-21	0.443514	0.292	0.083	7.69275e-16	ENSMUST00000079533	Rad51b	ENSMUSG00000059060	protein_coding	utr	chr12-79507730-79508656	chr12-79796191-79797433	287534
chr13-103102194-103103208	3.01815e-20	0.40402	0.168	0.017	6.10611e-15	ENSMUST00000171358	Mast4	ENSMUSG00000034751	protein_coding	gap	chr13-103058758-103140162	chr13-103102194-103103208	0
chr11-120256591-120257218	1.67172e-19	0.406312	0.202	0.033	3.38211e-14	ENSMUST00000122148	Bahcc1	ENSMUSG00000039741	protein_coding	gap	chr11-120237258-120259071	chr11-120256591-120257218	0
chr9-49980513-49981218	9.27269e-19	0.440084	0.165	0.015	1.87598e-13	ENSMUST00000193547	Ncam1	ENSMUSG00000039542	protein_coding	exon	chr9-49798678-49798925	chr9-49980513-49981218	181587
chr2-117080341-117080982	9.49473e-19	0.362056	0.119	0.003	1.92091e-13	ENSMUST00000028829	Spred1	ENSMUSG00000027351	protein_coding	exon	chr2-117121374-117121756	chr2-117080341-117080982	40391
chr2-152011728-152013017	1.21583e-18	0.438773	0.173	0.022	2.45979e-13	ENSMUST00000073228	Slc52a3	ENSMUSG00000027463	protein_coding	utr	chr2-152008159-152009258	chr2-152011728-152013017	2469
chr5-32350532-32350810	1.55862e-18	0.357182	0.101	0.001	3.1533e-13	ENSMUST00000101377	Plb1	ENSMUSG00000029134	protein_coding	cds	chr5-32350538-32350618	chr5-32350532-32350810	0
chr12-112516360-112517415	1.57162e-18	0.407242	0.204	0.041	3.17958e-13	ENSMUST00000066791	Tmem179	ENSMUSG00000054013	protein_coding	exon	chr12-112510744-112511160	chr12-112516360-112517415	5199
chr12-100298893-100300012	2.35372e-18	0.393714	0.248	0.073	4.76188e-13	ENSMUST00000062957	Ttc7b	ENSMUSG00000033530	protein_coding	utr	chr12-100300771-100301548	chr12-100298893-100300012	758
chr4-155780815-155781325	2.86969e-18	0.411753	0.207	0.033	5.80576e-13	ENSMUST00000097742	Tmem88b	ENSMUSG00000073680	protein_coding	utr	chr4-155781591-155784267	chr4-155780815-155781325	265
chr6-72276903-72277826	3.14103e-18	0.443733	0.313	0.077	6.3547e-13	ENSMUST00000183018	Sftpb	ENSMUSG00000056370	protein_coding	exon	chr6-72304610-72304688	chr6-72276903-72277826	26783
chr6-86219337-86219934	5.96809e-18	0.399808	0.137	0.01	1.20742e-12	ENSMUST00000194449	Tgfa	ENSMUSG00000029999	protein_coding	gap	chr6-86211733-86229430	chr6-86219337-86219934	0
chr1-132335426-132335806	9.99193e-18	0.412424	0.194	0.032	2.0215e-12	ENSMUST00000082125	Nuak2	ENSMUSG00000009772	protein_coding	utr	chr1-132332382-132333488	chr1-132335426-132335806	1937
chr18-68828946-68829662	1.15849e-17	0.395844	0.199	0.035	2.34378e-12	ENSMUST00000025428	4930546C10Rik	ENSMUSG00000024546	protein_coding	cds	chr18-68944633-68944705	chr18-68828946-68829662	114970
chr5-63953377-63953911	1.17468e-17	0.391329	0.158	0.022	2.37653e-12	ENSMUST00000154169	Rell1	ENSMUSG00000047881	protein_coding	gap	chr5-63938034-63968645	chr5-63953377-63953911	0
chr9-14730875-14731362	2.03073e-17	0.406036	0.178	0.02	4.10843e-12	ENSMUST00000115644	Piwil4	ENSMUSG00000036912	protein_coding	gap	chr9-14729997-14734442	chr9-14730875-14731362	0
chr8-118393833-118394570	2.28377e-17	0.431034	0.238	0.039	4.62037e-12	ENSMUST00000148836	Cdh13	ENSMUSG00000031841	protein_coding	gap	chr8-118283899-118505603	chr8-118393833-118394570	0
chr1-161507514-161508005	2.50075e-17	0.390663	0.132	0.01	5.05934e-12	ENSMUST00000086084	Tnfsf18	ENSMUSG00000066755	protein_coding	utr	chr1-161503805-161505290	chr1-161507514-161508005	2223
chr8-114121694-114122036	2.73313e-17	0.325505	0.088	0	5.52948e-12	ENSMUST00000073521	Nudt7	ENSMUSG00000031767	protein_coding	exon	chr8-114133557-114133700	chr8-114121694-114122036	11520
chr1-119219658-119220239	4.19002e-17	0.412363	0.191	0.032	8.47696e-12	ENSMUST00000189894	Gm29456	ENSMUSG00000099860	lincRNA	exon	chr1-119305346-119305675	chr1-119219658-119220239	85106
chr9-75425814-75426328	4.96471e-17	0.405329	0.209	0.052	1.00443e-11	ENSMUST00000180533	4933433G15Rik	ENSMUSG00000097021	lincRNA	exon	chr9-75417048-75417709	chr9-75425814-75426328	8104
chr12-86612046-86613058	5.3094e-17	0.371367	0.16	0.023	1.07416e-11	ENSMUST00000021681	Vash1	ENSMUSG00000021256	protein_coding	exon	chr12-86678700-86680326	chr12-86612046-86613058	65641
chr5-125251569-125253183	6.36721e-17	0.431455	0.295	0.093	1.28817e-11	ENSMUST00000086075	Scarb1	ENSMUSG00000037936	protein_coding	utr	chr5-125277087-125277865	chr5-125251569-125253183	23903
chr10-21783536-21783970	8.97931e-17	0.341675	0.098	0.001	1.81663e-11	ENSMUST00000189792	Gm29323	ENSMUSG00000099749	lincRNA	exon	chr10-21746792-21747006	chr10-21783536-21783970	36529
chr1-133492685-133493809	9.63301e-17	0.412823	0.256	0.07	1.94888e-11	ENSMUST00000153799	Sox13	ENSMUSG00000070643	protein_coding	exon	chr1-133423876-133424377	chr1-133492685-133493809	68307
chr5-125319119-125319519	9.90785e-17	0.397263	0.158	0.02	2.00449e-11	ENSMUST00000156532	Scarb1	ENSMUSG00000037936	protein_coding	gap	chr5-125304353-125326033	chr5-125319119-125319519	0
chr6-55245460-55246044	9.99395e-17	0.400436	0.16	0.02	2.02191e-11	ENSMUST00000053094	Fam188b	ENSMUSG00000038022	protein_coding	gap	chr6-55224369-55255610	chr6-55245460-55246044	0
chr6-51177845-51178877	1.00145e-16	0.431757	0.3	0.096	2.02606e-11	ENSMUST00000187879	Gm29004	ENSMUSG00000099538	lincRNA	exon	chr6-51003936-51004253	chr6-51177845-51178877	173591
chr5-112886555-112887368	1.10098e-16	0.400705	0.225	0.044	2.22743e-11	ENSMUST00000086617	Myo18b	ENSMUSG00000072720	protein_coding	gap	chr5-112879579-112896255	chr5-112886555-112887368	0
chr2-25548965-25549914	2.27312e-16	0.411022	0.227	0.055	4.59881e-11	ENSMUST00000028311	Traf2	ENSMUSG00000026942	protein_coding	exon	chr2-25546862-25546940	chr2-25548965-25549914	2024
chr12-73809953-73810671	2.53007e-16	0.369494	0.14	0.015	5.11866e-11	ENSMUST00000021527	Prkch	ENSMUSG00000021108	protein_coding	utr	chr12-73777059-73778185	chr12-73809953-73810671	31767
chr10-84686152-84686505	2.64882e-16	0.378743	0.137	0.013	5.35891e-11	ENSMUST00000077175	Polr3b	ENSMUSG00000034453	protein_coding	gap	chr10-84684305-84692796	chr10-84686152-84686505	0
chr3-146379805-146380511	2.80088e-16	0.354945	0.109	0.003	5.66655e-11	ENSMUST00000106153	Ssx2ip	ENSMUSG00000036825	protein_coding	exon	chr3-146404642-146404784	chr3-146379805-146380511	24130
chr8-125699216-125699976	2.81128e-16	0.373425	0.134	0.013	5.68758e-11	ENSMUST00000053078	Map10	ENSMUSG00000050930	protein_coding	utr	chr8-125672546-125673359	chr8-125699216-125699976	25856
chr7-130948751-130949720	3.30562e-16	0.391971	0.152	0.022	6.6877e-11	ENSMUST00000153290	Htra1	ENSMUSG00000006205	protein_coding	gap	chr7-130943595-130961512	chr7-130948751-130949720	0
chr14-31957134-31957683	4.62693e-16	0.386773	0.191	0.032	9.36087e-11	ENSMUST00000143315	D830044D21Rik	ENSMUSG00000046005	lincRNA	exon	chr14-31928064-31929879	chr14-31957134-31957683	27254
chr2-75959967-75960896	6.3954e-16	0.389683	0.258	0.08	1.29387e-10	ENSMUST00000099995	Ttc30a2	ENSMUSG00000075272	protein_coding	utr	chr2-75975740-75976171	chr2-75959967-75960896	14843
chr15-62202681-62203246	6.50137e-16	0.380761	0.147	0.015	1.31531e-10	ENSMUST00000183297	Pvt1	ENSMUSG00000097039	lincRNA	gap	chr15-62175549-62242173	chr15-62202681-62203246	0
chr18-75494517-75495703	8.771e-16	0.400843	0.39	0.142	1.77449e-10	ENSMUST00000165559	Ctif	ENSMUSG00000052928	protein_coding	gap	chr18-75472021-75519738	chr18-75494517-75495703	0
chr4-33281815-33282699	9.47706e-16	0.309924	0.096	0.004	1.91733e-10	ENSMUST00000137589	Pnrc1	ENSMUSG00000040128	protein_coding	gap	chr4-33246508-33289994	chr4-33281815-33282699	0
chr10-111078976-111079340	1.02158e-15	0.361608	0.132	0.015	2.06678e-10	ENSMUST00000171120	Gm5428	ENSMUSG00000091086	protein_coding	exon	chr10-111125851-111126738	chr10-111078976-111079340	46510
chr5-139014830-139015507	1.13546e-15	0.374741	0.227	0.052	2.29718e-10	ENSMUST00000026973	Prkar1b	ENSMUSG00000025855	protein_coding	utr	chr5-139017306-139018658	chr5-139014830-139015507	1798
chr19-27351538-27352086	1.26162e-15	0.375203	0.132	0.012	2.55241e-10	ENSMUST00000056708	Kcnv2	ENSMUSG00000047298	protein_coding	utr	chr19-27333924-27337179	chr19-27351538-27352086	14358
chr18-38844346-38844834	1.36025e-15	0.376556	0.109	0.006	2.75196e-10	ENSMUST00000148850	Arhgap26	ENSMUSG00000036452	protein_coding	gap	chr18-38676806-38933792	chr18-38844346-38844834	0
chr10-99409581-99410112	1.45067e-15	0.385091	0.194	0.042	2.9349e-10	ENSMUST00000189035	B530045E10Rik	ENSMUSG00000044633	lincRNA	gap	chr10-99402881-99420491	chr10-99409581-99410112	0
chr14-48421579-48422740	1.57541e-15	0.384068	0.196	0.048	3.18725e-10	ENSMUST00000124720	Tmem260	ENSMUSG00000036339	protein_coding	exon	chr14-48446128-48446335	chr14-48421579-48422740	23387
chr1-135782789-135783266	1.58828e-15	0.396643	0.238	0.065	3.21329e-10	ENSMUST00000132795	Tnni1	ENSMUSG00000026418	protein_coding	utr	chr1-135783235-135783430	chr1-135782789-135783266	0
chr6-119328827-119329579	1.59056e-15	0.396154	0.176	0.035	3.2179e-10	ENSMUST00000168793	Lrtm2	ENSMUSG00000055003	protein_coding	utr	chr6-119329104-119329204	chr6-119328827-119329579	0
chr4-86712332-86713891	1.6317e-15	0.38268	0.191	0.035	3.30115e-10	ENSMUST00000045512	Dennd4c	ENSMUSG00000038024	protein_coding	exon	chr4-86748555-86748912	chr4-86712332-86713891	34663
chr8-17590088-17590515	1.86367e-15	0.389292	0.116	0.007	3.77044e-10	ENSMUST00000137947	Csmd1	ENSMUSG00000060924	protein_coding	exon	chr8-17534890-17535586	chr8-17590088-17590515	54501
chr19-57301820-57302374	1.88173e-15	0.366825	0.165	0.028	3.80698e-10	ENSMUST00000156316	Ablim1	ENSMUSG00000025085	protein_coding	gap	chr19-57173460-57314692	chr19-57301820-57302374	0
chr2-124848189-124849151	2.42889e-15	0.372158	0.209	0.06	4.91396e-10	ENSMUST00000137397	Gm13994	ENSMUSG00000087450	lincRNA	exon	chr2-124711013-124711083	chr2-124848189-124849151	137105
chr4-103264949-103265519	2.65232e-15	0.375577	0.134	0.02	5.36598e-10	ENSMUST00000168664	4921539E11Rik	ENSMUSG00000028520	protein_coding	gap	chr4-103255576-103266339	chr4-103264949-103265519	0
chr8-122359159-122359450	2.7112e-15	0.329072	0.106	0.006	5.48511e-10	ENSMUST00000127664	Gm20388	ENSMUSG00000092329	protein_coding	gap	chr8-119910940-124295357	chr8-122359159-122359450	0
chr3-146567557-146568161	2.72142e-15	0.350233	0.114	0.006	5.50579e-10	ENSMUST00000029836	Dnase2b	ENSMUSG00000028185	protein_coding	utr	chr3-146580985-146582273	chr3-146567557-146568161	12823
chr11-68467563-68468513	3.08697e-15	0.358779	0.129	0.013	6.24535e-10	ENSMUST00000154220	Pik3r5	ENSMUSG00000020901	protein_coding	gap	chr11-68432263-68473794	chr11-68467563-68468513	0
chr19-45175789-45177308	3.21143e-15	0.346695	0.214	0.064	6.49714e-10	ENSMUST00000026236	Tlx1	ENSMUSG00000025215	protein_coding	utr	chr19-45156117-45156943	chr19-45175789-45177308	18845
chr7-110002773-110003431	3.26356e-15	0.362221	0.199	0.051	6.6026e-10	ENSMUST00000191157	1600010M07Rik	ENSMUSG00000101585	lincRNA	gap	chr7-109998774-110003585	chr7-110002773-110003431	0
chr4-132958805-132959901	3.78896e-15	0.368876	0.32	0.12	7.66556e-10	ENSMUST00000124451	Fgr	ENSMUSG00000028874	protein_coding	exon	chr4-132974095-132974270	chr4-132958805-132959901	14193
chr1-159888698-159889833	3.92183e-15	0.375993	0.183	0.039	7.93438e-10	ENSMUST00000192069	Tnr	ENSMUSG00000015829	protein_coding	cds	chr1-159889284-159889430	chr1-159888698-159889833	0
chr5-150222991-150224026	4.2911e-15	0.340087	0.111	0.007	8.68145e-10	ENSMUST00000087204	Fry	ENSMUSG00000056602	protein_coding	exon	chr5-150259930-150260338	chr5-150222991-150224026	35903
chr7-67450954-67451961	4.35839e-15	0.39253	0.253	0.083	8.81759e-10	ENSMUST00000053950	Lrrc28	ENSMUSG00000030556	protein_coding	utr	chr7-67513411-67515105	chr7-67450954-67451961	61449
chr2-132212025-132212726	4.84599e-15	0.356963	0.15	0.023	9.80407e-10	ENSMUST00000110164	Tmem230	ENSMUSG00000027341	protein_coding	utr	chr2-132239492-132240485	chr2-132212025-132212726	26765
chr19-21050891-21052251	5.99678e-15	0.335597	0.124	0.012	1.21323e-09	ENSMUST00000039500	Tmc1	ENSMUSG00000024749	protein_coding	exon	chr19-20954144-20954202	chr19-21050891-21052251	96688
chr11-67896695-67897570	6.605e-15	0.368867	0.178	0.025	1.33628e-09	ENSMUST00000108677	Usp43	ENSMUSG00000020905	protein_coding	cds	chr11-67897221-67897356	chr11-67896695-67897570	0
chr13-110534313-110534664	7.67982e-15	0.345621	0.124	0.013	1.55373e-09	ENSMUST00000022212	Plk2	ENSMUSG00000021701	protein_coding	utr	chr13-110400225-110400844	chr13-110534313-110534664	133468
chr4-53339039-53340230	8.6139e-15	0.401135	0.191	0.038	1.7427e-09	ENSMUST00000154377	Gm12496	ENSMUSG00000086267	lincRNA	exon	chr4-53401948-53402004	chr4-53339039-53340230	61717
chr5-147917962-147918711	9.30358e-15	0.380339	0.271	0.099	1.88224e-09	ENSMUST00000031655	Slc46a3	ENSMUSG00000029650	protein_coding	exon	chr5-147894481-147894815	chr5-147917962-147918711	23146
chr5-118458692-118459782	1.01161e-14	0.373228	0.282	0.097	2.04662e-09	ENSMUST00000100816	Med13l	ENSMUSG00000018076	protein_coding	exon	chr5-118560719-118560857	chr5-118458692-118459782	100936
chr4-155774170-155775883	1.48928e-14	0.374188	0.266	0.094	3.01301e-09	ENSMUST00000042196	Vwa1	ENSMUSG00000042116	protein_coding	cds	chr4-155774430-155774502	chr4-155774170-155775883	0
chr10-95707780-95708409	1.72127e-14	0.341423	0.137	0.02	3.48235e-09	ENSMUST00000099328	Anapc15-ps	ENSMUSG00000074780	protein_coding	exon	chr10-95673397-95673451	chr10-95707780-95708409	34328
chr12-17439932-17440669	1.80695e-14	0.370791	0.147	0.023	3.65569e-09	ENSMUST00000046011	Nol10	ENSMUSG00000061458	protein_coding	utr	chr12-17429235-17430094	chr12-17439932-17440669	9837
chr10-44940092-44940307	1.92623e-14	0.281247	0.072	0	3.89701e-09	ENSMUST00000099858	Prep	ENSMUSG00000019849	protein_coding	exon	chr10-45067206-45067375	chr10-44940092-44940307	126898
chr1-136830660-136831590	1.92811e-14	0.307195	0.098	0.004	3.90081e-09	ENSMUST00000027649	Nr5a2	ENSMUSG00000026398	protein_coding	utr	chr1-136842571-136845462	chr1-136830660-136831590	10980
chr4-105313177-105313654	1.98164e-14	0.359918	0.173	0.036	4.00911e-09	ENSMUST00000064139	Ppap2b	ENSMUSG00000028517	protein_coding	utr	chr4-105231023-105232764	chr4-105313177-105313654	80412
chr5-137671200-137672418	2.15428e-14	0.35185	0.393	0.174	4.35839e-09	ENSMUST00000151839	Agfg2	ENSMUSG00000029722	protein_coding	gap	chr5-137667775-137684358	chr5-137671200-137672418	0
chr14-118691520-118692306	2.30394e-14	0.327781	0.16	0.033	4.66117e-09	ENSMUST00000166646	Abcc4	ENSMUSG00000032849	protein_coding	gap	chr14-118669108-118706035	chr14-118691520-118692306	0
chr15-62391799-62392895	2.37625e-14	0.317513	0.096	0.006	4.80746e-09	ENSMUST00000181416	Pvt1	ENSMUSG00000097039	lincRNA	exon	chr15-62376024-62378096	chr15-62391799-62392895	13702
chr7-31000328-31001190	2.69157e-14	0.362149	0.207	0.052	5.4454e-09	ENSMUST00000129773	Fam187b	ENSMUSG00000046826	protein_coding	exon	chr7-30988980-30989720	chr7-31000328-31001190	10607
chr9-14729251-14729624	2.80109e-14	0.307408	0.098	0.003	5.66696e-09	ENSMUST00000115644	Piwil4	ENSMUSG00000036912	protein_coding	gap	chr9-14728725-14729874	chr9-14729251-14729624	0
chr12-24734722-24735458	3.10408e-14	0.336484	0.129	0.017	6.27996e-09	ENSMUST00000020980	Rrm2	ENSMUSG00000020649	protein_coding	utr	chr12-24713233-24714146	chr12-24734722-24735458	20575
chr19-34396196-34396589	3.11543e-14	0.316313	0.109	0.009	6.30292e-09	ENSMUST00000025691	Fas	ENSMUSG00000024778	protein_coding	utr	chr19-34327325-34327770	chr19-34396196-34396589	68425
chr14-76698695-76699118	4.04758e-14	0.356561	0.119	0.013	8.18877e-09	ENSMUST00000189375	1700108F19Rik	ENSMUSG00000101009	processed_transcript	exon	chr14-76686728-76687169	chr14-76698695-76699118	11525
chr4-150991186-150991673	4.25394e-14	0.352946	0.134	0.016	8.60627e-09	ENSMUST00000169423	Camta1	ENSMUSG00000014592	protein_coding	gap	chr4-150917334-151062675	chr4-150991186-150991673	0
chr7-110715365-110715980	4.30698e-14	0.366793	0.186	0.042	8.71359e-09	ENSMUST00000170374	Ampd3	ENSMUSG00000005686	protein_coding	exon	chr7-110768206-110768379	chr7-110715365-110715980	52225
chr12-17506847-17507651	4.54761e-14	0.394512	0.243	0.064	9.20042e-09	ENSMUST00000171737	Odc1	ENSMUSG00000011179	protein_coding	exon	chr12-17544873-17545168	chr12-17506847-17507651	37221
chr16-23456256-23456953	4.59021e-14	0.358286	0.134	0.023	9.28659e-09	ENSMUST00000089883	Masp1	ENSMUSG00000022887	protein_coding	gap	chr16-23454931-23457997	chr16-23456256-23456953	0
chr18-37877185-37878183	5.77438e-14	0.341357	0.437	0.197	1.16823e-08	ENSMUST00000115634	Diap1	ENSMUSG00000024456	protein_coding	gap	chr18-37860514-37889214	chr18-37877185-37878183	0
chr17-47841699-47843225	5.7771e-14	0.357736	0.245	0.084	1.16878e-08	ENSMUST00000082814	n-R5s28	ENSMUSG00000064748	rRNA	exon	chr17-47848834-47848952	chr17-47841699-47843225	5608
chr7-110156871-110158351	5.7944e-14	0.343482	0.163	0.029	1.17228e-08	ENSMUST00000185931	1600010M07Rik	ENSMUSG00000101585	lincRNA	exon	chr7-110150565-110151202	chr7-110156871-110158351	5668
chr18-38384727-38385294	5.9741e-14	0.361201	0.109	0.012	1.20864e-08	ENSMUST00000157759	Gm24690	ENSMUSG00000088384	rRNA	exon	chr18-38356578-38356674	chr18-38384727-38385294	28052
chr4-142165828-142166689	6.04742e-14	0.370858	0.253	0.07	1.22347e-08	ENSMUST00000174432	Kazn	ENSMUSG00000040606	protein_coding	gap	chr4-142159181-142210014	chr4-142165828-142166689	0
chr5-64391203-64391770	6.22801e-14	0.358841	0.14	0.022	1.26001e-08	ENSMUST00000101195	Tbc1d1	ENSMUSG00000029174	protein_coding	utr	chr5-64349931-64351486	chr5-64391203-64391770	39716
chr18-78090875-78091214	6.30203e-14	0.30184	0.088	0.006	1.27498e-08	ENSMUST00000091813	Slc14a1	ENSMUSG00000059336	protein_coding	utr	chr18-78100091-78102394	chr18-78090875-78091214	8876
chr3-19663274-19663538	6.35986e-14	0.3205	0.088	0.003	1.28668e-08	ENSMUST00000029139	Trim55	ENSMUSG00000060913	protein_coding	gap	chr3-19661881-19670923	chr3-19663274-19663538	0
chr13-43032181-43032767	6.44115e-14	0.331512	0.106	0.01	1.30313e-08	ENSMUST00000149235	Phactr1	ENSMUSG00000054728	protein_coding	gap	chr13-42956782-43037449	chr13-43032181-43032767	0
chr8-128653581-128655131	7.05369e-14	0.3828	0.31	0.106	1.42705e-08	ENSMUST00000090006	Itgb1	ENSMUSG00000025809	protein_coding	exon	chr8-128685654-128685959	chr8-128653581-128655131	30522
chr4-57839110-57839759	7.48035e-14	0.350934	0.142	0.023	1.51337e-08	ENSMUST00000150412	Palm2Akap2	ENSMUSG00000089945	protein_coding	gap	chr4-57757684-57854561	chr4-57839110-57839759	0
chr13-56647562-56648778	7.90613e-14	0.34852	0.212	0.051	1.59951e-08	ENSMUST00000045173	Tgfbi	ENSMUSG00000035493	protein_coding	utr	chr13-56638758-56639339	chr13-56647562-56648778	8222
chr12-8386256-8387080	8.00382e-14	0.355194	0.344	0.139	1.61928e-08	ENSMUST00000020927	Hs1bp3	ENSMUSG00000020605	protein_coding	utr	chr12-8342088-8343824	chr12-8386256-8387080	42431
chr5-108002826-108003059	8.23254e-14	0.357231	0.114	0.015	1.66555e-08	ENSMUST00000031198	Fam69a	ENSMUSG00000029270	protein_coding	exon	chr5-107986949-107987085	chr5-108002826-108003059	15740
chr16-6889219-6889594	8.83476e-14	0.345316	0.15	0.03	1.78739e-08	ENSMUST00000115841	Rbfox1	ENSMUSG00000008658	protein_coding	gap	chr16-6809249-7224310	chr16-6889219-6889594	0
chr17-31826702-31827481	8.85782e-14	0.365106	0.217	0.065	1.79205e-08	ENSMUST00000024839	Sik1	ENSMUSG00000024042	protein_coding	utr	chr17-31844248-31846282	chr17-31826702-31827481	16766
chr18-67815146-67815580	9.68942e-14	0.330831	0.093	0.007	1.9603e-08	ENSMUST00000025425	Cep192	ENSMUSG00000024542	protein_coding	gap	chr18-67814000-67815853	chr18-67815146-67815580	0
chr8-24419068-24419985	9.76557e-14	0.354396	0.142	0.019	1.9757e-08	ENSMUST00000181338	Gm26714	ENSMUSG00000097654	lincRNA	exon	chr8-24422404-24422535	chr8-24419068-24419985	2418
chr12-73790432-73791001	9.84145e-14	0.374455	0.194	0.039	1.99105e-08	ENSMUST00000021527	Prkch	ENSMUSG00000021108	protein_coding	utr	chr12-73777059-73778185	chr12-73790432-73791001	12246
chr16-84971894-84972433	1.12012e-13	0.343722	0.155	0.035	2.26616e-08	ENSMUST00000005406	App	ENSMUSG00000022892	protein_coding	gap	chr16-84971462-84978063	chr16-84971894-84972433	0
chr1-151975510-151975715	1.15983e-13	0.353427	0.119	0.01	2.34649e-08	ENSMUST00000187603	1700025G04Rik	ENSMUSG00000032666	protein_coding	gap	chr1-151921124-151980425	chr1-151975510-151975715	0
chr1-138343035-138343819	1.224e-13	0.327296	0.114	0.01	2.47632e-08	ENSMUST00000027643	Atp6v1g3	ENSMUSG00000026394	protein_coding	utr	chr1-138287961-138289462	chr1-138343035-138343819	53572
chr7-24386999-24387614	1.25223e-13	0.366362	0.173	0.026	2.53342e-08	ENSMUST00000171904	Kcnn4	ENSMUSG00000054342	protein_coding	utr	chr7-24384637-24385209	chr7-24386999-24387614	1789
chr4-8906727-8907059	1.3959e-13	0.341609	0.119	0.015	2.82408e-08	ENSMUST00000051558	Chd7	ENSMUSG00000041235	protein_coding	utr	chr4-8866656-8867659	chr4-8906727-8907059	39067
chr10-116750897-116751273	1.52329e-13	0.327243	0.119	0.015	3.08182e-08	ENSMUST00000185546	1700030O20Rik	ENSMUSG00000100198	lincRNA	exon	chr10-116729077-116729177	chr10-116750897-116751273	21719
chr12-86831972-86833053	1.55855e-13	0.346127	0.271	0.103	3.15315e-08	ENSMUST00000038422	Irf2bpl	ENSMUSG00000034168	protein_coding	utr	chr12-86880703-86881569	chr12-86831972-86833053	47649
chr9-63803023-63803639	1.58019e-13	0.348154	0.152	0.026	3.19693e-08	ENSMUST00000034973	Smad3	ENSMUSG00000032402	protein_coding	exon	chr9-63757472-63757994	chr9-63803023-63803639	45028
chr16-90864549-90865122	1.69659e-13	0.284989	0.067	0	3.43242e-08	ENSMUST00000154180	Eva1c	ENSMUSG00000039903	protein_coding	gap	chr16-90846812-90866254	chr16-90864549-90865122	0
chr6-17211018-17211783	1.81032e-13	0.323339	0.106	0.013	3.66251e-08	ENSMUST00000124434	D830026I12Rik	ENSMUSG00000085171	lincRNA	exon	chr6-17209900-17210152	chr6-17211018-17211783	865
chr12-32434641-32435404	2.17602e-13	0.312276	0.093	0.003	4.40236e-08	ENSMUST00000172332	Ccdc71l	ENSMUSG00000090946	protein_coding	utr	chr12-32379641-32382943	chr12-32434641-32435404	51697
chr12-76589314-76589792	2.27777e-13	0.339252	0.093	0.006	4.60822e-08	ENSMUST00000021458	Sptb	ENSMUSG00000021061	protein_coding	gap	chr12-76587591-76597725	chr12-76589314-76589792	0
chr5-111247379-111248443	2.39001e-13	0.354288	0.147	0.022	4.8353e-08	ENSMUST00000156290	Ttc28	ENSMUSG00000033209	protein_coding	gap	chr5-111235642-111266534	chr5-111247379-111248443	0
chr19-37918438-37918772	2.92713e-13	0.331162	0.114	0.015	5.92197e-08	ENSMUST00000172095	Myof	ENSMUSG00000048612	protein_coding	gap	chr19-37916564-37920718	chr19-37918438-37918772	0
chr7-135604697-135605753	2.98205e-13	0.341545	0.214	0.068	6.03308e-08	ENSMUST00000073961	Ptpre	ENSMUSG00000041836	protein_coding	gap	chr7-135601488-135643857	chr7-135604697-135605753	0
chr3-31339121-31339601	3.00923e-13	0.297197	0.078	0.001	6.08805e-08	ENSMUST00000193926	RP24-114A9.1	ENSMUSG00000103998	lincRNA	exon	chr3-31341012-31342615	chr3-31339121-31339601	1410
chr10-95112096-95112796	3.01335e-13	0.336934	0.155	0.028	6.09639e-08	ENSMUST00000053594	Cradd	ENSMUSG00000045867	protein_coding	utr	chr10-95174746-95175676	chr10-95112096-95112796	61949
chr7-126096582-126096888	3.049e-13	0.313441	0.119	0.017	6.16853e-08	ENSMUST00000168189	Xpo6	ENSMUSG00000000131	protein_coding	utr	chr7-126101715-126102288	chr7-126096582-126096888	4826
chr12-13117919-13118527	3.05246e-13	0.372749	0.178	0.035	6.17552e-08	ENSMUST00000071103	Ddx1	ENSMUSG00000037149	protein_coding	utr	chr12-13219308-13219497	chr12-13117919-13118527	100780
chr18-24101399-24102111	3.12807e-13	0.365909	0.341	0.128	6.32849e-08	ENSMUST00000153360	Ino80c	ENSMUSG00000047989	protein_coding	utr	chr18-24104757-24106526	chr18-24101399-24102111	2645
chr7-127008118-127009104	3.31461e-13	0.338902	0.199	0.055	6.70588e-08	ENSMUST00000172958	Pagr1b	ENSMUSG00000092534	protein_coding	gap	chr7-127001959-127015247	chr7-127008118-127009104	0
chr2-148478118-148478691	3.49131e-13	0.354855	0.238	0.078	7.06337e-08	ENSMUST00000129067	Gm14120	ENSMUSG00000087678	lincRNA	exon	chr2-148476067-148478780	chr2-148478118-148478691	0
chr18-60609198-60610015	3.59213e-13	0.327894	0.385	0.187	7.26734e-08	ENSMUST00000155195	Synpo	ENSMUSG00000043079	protein_coding	utr	chr18-60609911-60610001	chr18-60609198-60610015	0
chr1-184259690-184261528	3.62083e-13	0.369021	0.168	0.041	7.32541e-08	ENSMUST00000193894	RP23-172L16.3	ENSMUSG00000102682	lincRNA	exon	chr1-184358329-184358565	chr1-184259690-184261528	96800
chr5-136227995-136228283	3.733e-13	0.306951	0.09	0.009	7.55235e-08	ENSMUST00000005188	Sh2b2	ENSMUSG00000005057	protein_coding	gap	chr5-136227469-136231652	chr5-136227995-136228283	0
chr7-84187587-84188543	3.8176e-13	0.322757	0.103	0.013	7.7235e-08	ENSMUST00000180424	Gm26708	ENSMUSG00000097016	lincRNA	gap	chr7-84152685-84188991	chr7-84187587-84188543	0
chrX-98380202-98380666	3.86259e-13	0.390223	0.124	0.017	7.81453e-08	ENSMUST00000052837	Ar	ENSMUSG00000046532	protein_coding	utr	chrX-98316881-98323215	chrX-98380202-98380666	56986
chr9-32937421-32937643	4.02792e-13	0.311814	0.096	0.01	8.149e-08	ENSMUST00000185169	Gm27162	ENSMUSG00000099025	lincRNA	exon	chr9-32928877-32928966	chr9-32937421-32937643	8454
chr6-125992653-125993113	4.03019e-13	0.330639	0.119	0.013	8.1536e-08	ENSMUST00000160496	Ano2	ENSMUSG00000038115	protein_coding	cds	chr6-125992819-125992964	chr6-125992653-125993113	0
chr17-32006676-32007164	4.03801e-13	0.348066	0.191	0.054	8.16942e-08	ENSMUST00000133308	Hsf2bp	ENSMUSG00000002076	protein_coding	gap	chr17-31946812-32007675	chr17-32006676-32007164	0
chr1-154032380-154033107	4.21646e-13	0.374718	0.165	0.032	8.53044e-08	ENSMUST00000188704	Gm28286	ENSMUSG00000100502	lincRNA	gap	chr1-154027726-154033119	chr1-154032380-154033107	0
chr12-108309184-108310019	4.25218e-13	0.352045	0.132	0.02	8.60272e-08	ENSMUST00000021685	Hhipl1	ENSMUSG00000021260	protein_coding	gap	chr12-108306684-108311687	chr12-108309184-108310019	0
chr4-57672966-57673887	4.81343e-13	0.347339	0.253	0.097	9.7382e-08	ENSMUST00000150412	Palm2Akap2	ENSMUSG00000089945	protein_coding	gap	chr4-57648121-57688415	chr4-57672966-57673887	0
chr14-76687688-76688525	4.90007e-13	0.336414	0.183	0.045	9.91348e-08	ENSMUST00000189375	1700108F19Rik	ENSMUSG00000101009	processed_transcript	exon	chr14-76686728-76687169	chr14-76687688-76688525	518
chr15-10817872-10818931	4.91639e-13	0.354366	0.375	0.161	9.94649e-08	ENSMUST00000180604	4930556M19Rik	ENSMUSG00000097058	lincRNA	exon	chr15-10788615-10790123	chr15-10817872-10818931	27748
chr9-57563002-57563324	5.27566e-13	0.317923	0.096	0.006	1.06734e-07	ENSMUST00000045791	Scamp2	ENSMUSG00000040188	protein_coding	gap	chr9-57561111-57577192	chr9-57563002-57563324	0
chr4-131743510-131744950	5.45779e-13	0.360227	0.346	0.145	1.10418e-07	ENSMUST00000105987	Ptpru	ENSMUSG00000028909	protein_coding	utr	chr4-131768457-131769497	chr4-131743510-131744950	23506
chr2-172498806-172499110	5.49447e-13	0.303454	0.093	0.004	1.1116e-07	ENSMUST00000029007	Fam209	ENSMUSG00000027505	protein_coding	utr	chr2-172474220-172474331	chr2-172498806-172499110	24474
chr10-52273059-52273282	5.80056e-13	0.278479	0.07	0.001	1.17353e-07	ENSMUST00000140921	Dcbld1	ENSMUSG00000019891	protein_coding	gap	chr10-52261940-52284102	chr10-52273059-52273282	0
chr2-30771431-30773335	5.81008e-13	0.353788	0.339	0.142	1.17546e-07	ENSMUST00000139968	1700001O22Rik	ENSMUSG00000044320	protein_coding	exon	chr2-30794769-30795009	chr2-30771431-30773335	21433
chr4-82566928-82567185	6.00079e-13	0.307766	0.096	0.009	1.21404e-07	ENSMUST00000155821	Nfib	ENSMUSG00000008575	protein_coding	gap	chr4-82498770-82705514	chr4-82566928-82567185	0
chr17-34218130-34219384	6.37806e-13	0.361701	0.258	0.086	1.29037e-07	ENSMUST00000025197	Tap2	ENSMUSG00000024339	protein_coding	utr	chr17-34216094-34216321	chr17-34218130-34219384	1808
chr1-183040528-183041391	6.6069e-13	0.337751	0.276	0.097	1.33666e-07	ENSMUST00000195372	Disp1	ENSMUSG00000030768	protein_coding	utr	chr1-183086266-183086288	chr1-183040528-183041391	44874
chr1-166278587-166279138	7.01639e-13	0.322823	0.109	0.01	1.41951e-07	ENSMUST00000195557	Ildr2	ENSMUSG00000040612	protein_coding	gap	chr1-166270619-166291415	chr1-166278587-166279138	0
chr19-47510211-47511203	7.08688e-13	0.340484	0.287	0.123	1.43377e-07	ENSMUST00000182808	Obfc1	ENSMUSG00000042694	protein_coding	cds	chr19-47510335-47510457	chr19-47510211-47511203	0
chr4-105557222-105557772	7.10538e-13	0.271785	0.078	0.003	1.43751e-07	ENSMUST00000184254	Gm12728	ENSMUSG00000083780	protein_coding	exon	chr4-105789869-105789890	chr4-105557222-105557772	232096
chr8-3299286-3300026	7.41077e-13	0.303533	0.083	0.004	1.4993e-07	ENSMUST00000091291	Insr	ENSMUSG00000005534	protein_coding	exon	chr8-3279029-3279617	chr8-3299286-3300026	19668
chr7-105475552-105475886	7.75571e-13	0.327207	0.132	0.019	1.56908e-07	ENSMUST00000181339	Cckbr	ENSMUSG00000030898	protein_coding	utr	chr7-105470726-105470898	chr7-105475552-105475886	4653
chr2-6118117-6118667	7.84942e-13	0.36923	0.158	0.019	1.58804e-07	ENSMUST00000126551	Proser2	ENSMUSG00000045319	protein_coding	gap	chr2-6114114-6129627	chr2-6118117-6118667	0
chr14-72807180-72808221	8.18536e-13	0.283817	0.088	0.007	1.656e-07	ENSMUST00000089017	Fndc3a	ENSMUSG00000033487	protein_coding	exon	chr14-72709718-72710003	chr14-72807180-72808221	97176
chr18-75405626-75405909	8.61782e-13	0.366537	0.202	0.054	1.7435e-07	ENSMUST00000026999	Smad7	ENSMUSG00000025880	protein_coding	utr	chr18-75394366-75395935	chr18-75405626-75405909	9690
chr1-89730502-89731102	1.04463e-12	0.350573	0.178	0.045	2.11343e-07	ENSMUST00000190096	Agap1	ENSMUSG00000055013	protein_coding	gap	chr1-89726066-89743727	chr1-89730502-89731102	0
chr13-102646032-102646828	1.05374e-12	0.350391	0.214	0.075	2.13185e-07	ENSMUST00000022124	Cd180	ENSMUSG00000021624	protein_coding	exon	chr13-102693558-102693789	chr13-102646032-102646828	46729
chr7-49093118-49094073	1.07594e-12	0.322693	0.121	0.019	2.17678e-07	ENSMUST00000183659	Nav2	ENSMUSG00000052512	protein_coding	gap	chr7-48964441-49362097	chr7-49093118-49094073	0
chr11-76469086-76469967	1.07941e-12	0.314093	0.106	0.015	2.18379e-07	ENSMUST00000151526	Abr	ENSMUSG00000017631	protein_coding	gap	chr11-76468777-76472488	chr11-76469086-76469967	0
chr12-53825891-53826462	1.10229e-12	0.348795	0.142	0.028	2.23009e-07	ENSMUST00000101432	Npas3	ENSMUSG00000021010	protein_coding	gap	chr12-53640537-53831695	chr12-53825891-53826462	0
chr4-129017211-129017451	1.10615e-12	0.320721	0.088	0.007	2.23788e-07	ENSMUST00000102604	Ak2	ENSMUSG00000028792	protein_coding	utr	chr4-129010568-129011529	chr4-129017211-129017451	5681
chr13-55189117-55190800	1.22422e-12	0.349418	0.434	0.216	2.47675e-07	ENSMUST00000099490	Nsd1	ENSMUSG00000021488	protein_coding	exon	chr13-55209782-55209875	chr13-55189117-55190800	18981
chr11-101849147-101849724	1.25533e-12	0.326714	0.114	0.01	2.53969e-07	ENSMUST00000057054	Meox1	ENSMUSG00000001493	protein_coding	utr	chr11-101877510-101878606	chr11-101849147-101849724	27785
chr9-64506451-64507223	1.29468e-12	0.300153	0.09	0.004	2.6193e-07	ENSMUST00000164113	Megf11	ENSMUSG00000036466	protein_coding	gap	chr9-64506130-64508707	chr9-64506451-64507223	0
chr13-34708809-34709402	1.37687e-12	0.345668	0.253	0.097	2.78558e-07	ENSMUST00000039605	Fam50b	ENSMUSG00000038246	protein_coding	exon	chr13-34734850-34734908	chr13-34708809-34709402	25447
chr3-126292183-126293034	1.48224e-12	0.319699	0.093	0.006	2.99876e-07	ENSMUST00000093976	Arsj	ENSMUSG00000046561	protein_coding	exon	chr3-126363827-126365165	chr3-126292183-126293034	70792
chr2-80717789-80718352	1.48761e-12	0.260121	0.062	0	3.00963e-07	ENSMUST00000135305	Nup35	ENSMUSG00000026999	protein_coding	exon	chr2-80658321-80658906	chr2-80717789-80718352	58882
chr15-97559835-97560462	1.52807e-12	0.346761	0.196	0.049	3.09148e-07	ENSMUST00000023104	Rpap3	ENSMUSG00000022466	protein_coding	utr	chr15-97675105-97675293	chr15-97559835-97560462	114642
chr11-34977872-34978217	1.57636e-12	0.282991	0.075	0.004	3.18919e-07	ENSMUST00000131249	Gm12711	ENSMUSG00000085090	lincRNA	exon	chr11-34882337-34882531	chr11-34977872-34978217	95340
chr18-38578154-38578983	1.62891e-12	0.354635	0.196	0.062	3.2955e-07	ENSMUST00000025295	Spry4	ENSMUSG00000024427	protein_coding	utr	chr18-38586268-38589805	chr18-38578154-38578983	7284
chr8-24427482-24427894	1.64475e-12	0.359154	0.171	0.046	3.32755e-07	ENSMUST00000181338	Gm26714	ENSMUSG00000097654	lincRNA	gap	chr8-24423672-24438647	chr8-24427482-24427894	0
chr2-83700431-83701407	1.67319e-12	0.304463	0.098	0.013	3.38509e-07	ENSMUST00000028499	Itgav	ENSMUSG00000027087	protein_coding	exon	chr2-83724397-83724919	chr2-83700431-83701407	22989
chr14-121824304-121825148	1.6733e-12	0.354525	0.227	0.067	3.38529e-07	ENSMUST00000100299	Dock9	ENSMUSG00000025558	protein_coding	exon	chr14-121797490-121797734	chr14-121824304-121825148	26569
chr4-136218243-136219197	1.6738e-12	0.335165	0.137	0.023	3.38631e-07	ENSMUST00000047526	Asap3	ENSMUSG00000036995	protein_coding	gap	chr4-136206648-136227407	chr4-136218243-136219197	0
chr15-80218891-80220573	1.70611e-12	0.318208	0.209	0.07	3.45168e-07	ENSMUST00000044970	Mgat3	ENSMUSG00000042428	protein_coding	utr	chr15-80212591-80215519	chr15-80218891-80220573	3371
chr7-98170364-98171853	1.76433e-12	0.350955	0.279	0.102	3.56946e-07	ENSMUST00000040971	Capn5	ENSMUSG00000035547	protein_coding	gap	chr7-98162111-98178043	chr7-98170364-98171853	0
chr11-117101289-117101814	1.85544e-12	0.359026	0.248	0.086	3.7538e-07	ENSMUST00000127090	Sec14l1	ENSMUSG00000020823	protein_coding	exon	chr11-117115168-117115351	chr11-117101289-117101814	13353
chr7-71603146-71603707	1.96714e-12	0.302413	0.109	0.016	3.97979e-07	ENSMUST00000190004	Gm29295	ENSMUSG00000099558	lincRNA	exon	chr7-71390486-71391272	chr7-71603146-71603707	211873
chr15-90109454-90109786	2.11131e-12	0.329437	0.119	0.015	4.27146e-07	ENSMUST00000100309	Alg10b	ENSMUSG00000075470	protein_coding	exon	chr15-90224311-90224608	chr15-90109454-90109786	114524
chr9-70841016-70842956	2.14057e-12	0.332233	0.22	0.064	4.33064e-07	ENSMUST00000034731	Lipc	ENSMUSG00000032207	protein_coding	gap	chr9-70823564-70934475	chr9-70841016-70842956	0
chr4-59307636-59308556	2.14121e-12	0.301674	0.098	0.01	4.33194e-07	ENSMUST00000040166	Susd1	ENSMUSG00000038578	protein_coding	utr	chr4-59314683-59315408	chr4-59307636-59308556	6126
chr3-84235463-84235956	2.20088e-12	0.368786	0.121	0.017	4.45267e-07	ENSMUST00000147901	Trim2	ENSMUSG00000027993	protein_coding	gap	chr3-84210352-84259324	chr3-84235463-84235956	0
chr1-58859632-58860250	2.21721e-12	0.333167	0.119	0.015	4.4857e-07	ENSMUST00000027189	Casp8	ENSMUSG00000026029	protein_coding	utr	chr1-58846755-58847503	chr1-58859632-58860250	12128
chr2-118507105-118507433	2.22627e-12	0.287865	0.09	0.007	4.50403e-07	ENSMUST00000090219	Bmf	ENSMUSG00000040093	protein_coding	utr	chr2-118528757-118532557	chr2-118507105-118507433	21323
chr2-28566555-28566871	2.23374e-12	0.317788	0.147	0.032	4.51915e-07	ENSMUST00000113889	Gtf3c5	ENSMUSG00000026816	protein_coding	utr	chr2-28566311-28567177	chr2-28566555-28566871	0
chr13-101539928-101541129	2.31798e-12	0.333172	0.225	0.077	4.68958e-07	ENSMUST00000190179	Gm29341	ENSMUSG00000099774	lincRNA	exon	chr13-101605618-101605622	chr13-101539928-101541129	64488
chr9-88296401-88296693	2.40806e-12	0.320052	0.137	0.026	4.87182e-07	ENSMUST00000034992	Nt5e	ENSMUSG00000032420	protein_coding	exon	chr9-88327197-88328030	chr9-88296401-88296693	30503
chr12-110702824-110703573	2.46187e-12	0.314606	0.186	0.06	4.98068e-07	ENSMUST00000155242	Hsp90aa1	ENSMUSG00000021270	protein_coding	exon	chr12-110702623-110702728	chr12-110702824-110703573	95
chr4-116175619-116177699	2.51906e-12	0.341557	0.318	0.138	5.09639e-07	ENSMUST00000150216	Gm12951	ENSMUSG00000085920	lincRNA	gap	chr4-116176410-116177462	chr4-116175619-116177699	0
chr3-149232952-149234255	2.59649e-12	0.361267	0.181	0.051	5.25303e-07	ENSMUST00000180599	Gm10287	ENSMUSG00000070342	lincRNA	exon	chr3-149221687-149225745	chr3-149232952-149234255	7206
chr4-40844962-40845832	2.61094e-12	0.335106	0.282	0.113	5.28228e-07	ENSMUST00000108096	B4galt1	ENSMUSG00000028413	protein_coding	gap	chr4-40823675-40853390	chr4-40844962-40845832	0
chr10-25519981-25520784	2.66374e-12	0.3236	0.142	0.028	5.38909e-07	ENSMUST00000092645	Epb4.1l2	ENSMUSG00000019978	protein_coding	gap	chr10-25513082-25522296	chr10-25519981-25520784	0
chr8-120809112-120809323	2.67599e-12	0.292118	0.08	0.004	5.41388e-07	ENSMUST00000127664	Gm20388	ENSMUSG00000092329	protein_coding	gap	chr8-119910940-124295357	chr8-120809112-120809323	0
chr3-28467742-28468318	2.70728e-12	0.316766	0.116	0.015	5.47719e-07	ENSMUST00000162777	Tnik	ENSMUSG00000027692	protein_coding	gap	chr3-28359057-28493966	chr3-28467742-28468318	0
chr7-134673960-134674289	2.74499e-12	0.319699	0.176	0.054	5.55347e-07	ENSMUST00000084488	Dock1	ENSMUSG00000058325	protein_coding	gap	chr7-134670845-134724329	chr7-134673960-134674289	0
chr4-134288563-134289107	2.91135e-12	0.320475	0.119	0.017	5.89003e-07	ENSMUST00000061234	Pdik1l	ENSMUSG00000050890	protein_coding	exon	chr4-134287627-134287895	chr4-134288563-134289107	667
chr2-169790288-169791249	2.94957e-12	0.328684	0.251	0.087	5.96737e-07	ENSMUST00000181446	Gm26883	ENSMUSG00000096972	lincRNA	gap	chr2-169790988-169883511	chr2-169790288-169791249	0
chr9-58274684-58276108	3.05044e-12	0.319322	0.289	0.119	6.17145e-07	ENSMUST00000061799	Loxl1	ENSMUSG00000032334	protein_coding	utr	chr9-58287723-58288910	chr9-58274684-58276108	11614
chr8-12925798-12926312	3.10778e-12	0.354084	0.209	0.065	6.28745e-07	ENSMUST00000173099	Mcf2l	ENSMUSG00000031442	protein_coding	gap	chr8-12915496-12963163	chr8-12925798-12926312	0
chr11-72469191-72469551	3.31613e-12	0.355206	0.302	0.12	6.70896e-07	ENSMUST00000147418	Spns2	ENSMUSG00000040447	protein_coding	gap	chr11-72463780-72474704	chr11-72469191-72469551	0
chr19-40307219-40307993	3.36284e-12	0.339165	0.253	0.071	6.80346e-07	ENSMUST00000165469	Sorbs1	ENSMUSG00000025006	protein_coding	gap	chr19-40299522-40311668	chr19-40307219-40307993	0
chr1-39733990-39735136	3.40273e-12	0.317474	0.212	0.067	6.88416e-07	ENSMUST00000151913	Rfx8	ENSMUSG00000057173	protein_coding	exon	chr1-39720878-39720997	chr1-39733990-39735136	12992
chr18-61223825-61224607	3.5844e-12	0.310673	0.111	0.017	7.2517e-07	ENSMUST00000025468	Pde6a	ENSMUSG00000024575	protein_coding	gap	chr18-61221079-61231347	chr18-61223825-61224607	0
chr10-120635604-120636552	3.89639e-12	0.322898	0.158	0.032	7.88291e-07	ENSMUST00000056994	4921513I03Rik	ENSMUSG00000044544	protein_coding	exon	chr10-120765774-120765838	chr10-120635604-120636552	129221
chr1-74294822-74296142	4.08807e-12	0.325937	0.455	0.237	8.27071e-07	ENSMUST00000141560	Tmbim1	ENSMUSG00000006301	protein_coding	cds	chr1-74295198-74295399	chr1-74294822-74296142	0
chr17-31931091-31931907	4.21335e-12	0.360422	0.199	0.054	8.52416e-07	ENSMUST00000002145	Hsf2bp	ENSMUSG00000002076	protein_coding	utr	chr17-31944769-31946602	chr17-31931091-31931907	12861
chr5-31876381-31876962	4.60688e-12	0.352177	0.16	0.033	9.32032e-07	ENSMUST00000131995	Bre	ENSMUSG00000052139	protein_coding	gap	chr5-31831160-31901054	chr5-31876381-31876962	0
chr14-34378538-34379245	5.22442e-12	0.330031	0.207	0.068	1.05697e-06	ENSMUST00000111908	Mmrn2	ENSMUSG00000041445	protein_coding	gap	chr14-34375779-34396164	chr14-34378538-34379245	0
chr1-61309476-61310549	5.23534e-12	0.313062	0.098	0.01	1.05918e-06	ENSMUST00000128274	Gm11587	ENSMUSG00000085248	lincRNA	exon	chr1-61307524-61307746	chr1-61309476-61310549	1729
chr10-14056982-14058596	5.85097e-12	0.353241	0.181	0.046	1.18373e-06	ENSMUST00000191464	Hivep2	ENSMUSG00000015501	protein_coding	gap	chr10-14004276-14066582	chr10-14056982-14058596	0
chr8-17587326-17587722	5.93978e-12	0.269197	0.067	0.001	1.20169e-06	ENSMUST00000137947	Csmd1	ENSMUSG00000060924	protein_coding	exon	chr8-17534890-17535586	chr8-17587326-17587722	51739
chr13-45576030-45576670	5.98722e-12	0.318086	0.124	0.015	1.21129e-06	ENSMUST00000180110	Atxn1	ENSMUSG00000046876	protein_coding	gap	chr13-45568581-45697820	chr13-45576030-45576670	0
chr16-87688491-87689705	6.4431e-12	0.295254	0.127	0.029	1.30352e-06	ENSMUST00000026703	Bach1	ENSMUSG00000025612	protein_coding	exon	chr16-87698945-87699056	chr16-87688491-87689705	9239
chr5-107996008-107996211	6.51978e-12	0.309329	0.103	0.012	1.31904e-06	ENSMUST00000031198	Fam69a	ENSMUSG00000029270	protein_coding	exon	chr5-107986949-107987085	chr5-107996008-107996211	8922
chr2-38621208-38622007	7.07429e-12	0.311587	0.106	0.012	1.43122e-06	ENSMUST00000151981	Psmb7	ENSMUSG00000026750	protein_coding	gap	chr2-38613491-38633850	chr2-38621208-38622007	0
chr11-55405641-55406557	7.37499e-12	0.325237	0.233	0.077	1.49206e-06	ENSMUST00000141530	Sparc	ENSMUSG00000018593	protein_coding	cds	chr11-55406510-55406597	chr11-55405641-55406557	0
chr11-68188292-68189223	7.56048e-12	0.346883	0.168	0.042	1.52958e-06	ENSMUST00000129992	Stx8	ENSMUSG00000020903	protein_coding	gap	chr11-68109379-68203705	chr11-68188292-68189223	0
chr7-92950753-92951160	7.59912e-12	0.355046	0.189	0.048	1.5374e-06	ENSMUST00000076052	Prcp	ENSMUSG00000061119	protein_coding	utr	chr7-92933180-92934573	chr7-92950753-92951160	16179
chr6-108688076-108688983	7.79693e-12	0.31943	0.127	0.019	1.57742e-06	ENSMUST00000032194	Bhlhe40	ENSMUSG00000030103	protein_coding	utr	chr6-108665333-108666925	chr6-108688076-108688983	21150
chr4-142088834-142089119	7.82747e-12	0.310778	0.124	0.019	1.5836e-06	ENSMUST00000141769	Tmem51os1	ENSMUSG00000073728	processed_transcript	exon	chr4-142086876-142088099	chr4-142088834-142089119	734
chr12-25119237-25119671	7.88561e-12	0.341922	0.207	0.064	1.59536e-06	ENSMUST00000020974	Id2	ENSMUSG00000020644	protein_coding	exon	chr12-25095663-25096092	chr12-25119237-25119671	23144
chr8-122144603-122145513	7.9156e-12	0.291482	0.119	0.019	1.60143e-06	ENSMUST00000127664	Gm20388	ENSMUSG00000092329	protein_coding	gap	chr8-119910940-124295357	chr8-122144603-122145513	0
chr13-107600209-107601145	7.98149e-12	0.338605	0.191	0.065	1.61476e-06	ENSMUST00000188490	1700006H21Rik	ENSMUSG00000102000	lincRNA	exon	chr13-107687397-107687584	chr13-107600209-107601145	86251
chr10-69777051-69777652	8.31572e-12	0.273202	0.078	0.001	1.68238e-06	ENSMUST00000183169	Ank3	ENSMUSG00000069601	protein_coding	gap	chr10-69534285-69808415	chr10-69777051-69777652	0
chr11-68852116-68854455	8.54959e-12	0.298483	0.501	0.264	1.72969e-06	ENSMUST00000108672	Ndel1	ENSMUSG00000018736	protein_coding	utr	chr11-68852942-68853041	chr11-68852116-68854455	0
chr2-125975756-125976334	9.14803e-12	0.256421	0.067	0.003	1.85077e-06	ENSMUST00000094604	Galk2	ENSMUSG00000027207	protein_coding	gap	chr2-125975462-125983054	chr2-125975756-125976334	0
chr5-139017518-139018102	9.16955e-12	0.336441	0.199	0.052	1.85512e-06	ENSMUST00000110890	Prkar1b	ENSMUSG00000025855	protein_coding	utr	chr5-139017308-139018658	chr5-139017518-139018102	0
chr18-38906256-38906731	9.36078e-12	0.340477	0.199	0.067	1.89381e-06	ENSMUST00000187912	Arhgap26	ENSMUSG00000036452	protein_coding	gap	chr18-38899900-38933792	chr18-38906256-38906731	0
chr10-4107338-4108189	9.42971e-12	0.326844	0.413	0.189	1.90775e-06	ENSMUST00000120585	Mthfd1l	ENSMUSG00000040675	protein_coding	gap	chr10-4106530-4148008	chr10-4107338-4108189	0
chr5-31567958-31568158	9.52978e-12	0.308496	0.119	0.019	1.928e-06	ENSMUST00000117262	Slc4a1ap	ENSMUSG00000029141	protein_coding	utr	chr5-31553789-31554042	chr5-31567958-31568158	13915
chr5-64703048-64703472	9.55303e-12	0.322495	0.147	0.036	1.9327e-06	ENSMUST00000180650	Gm26761	ENSMUSG00000097668	lincRNA	exon	chr5-64698429-64698520	chr5-64703048-64703472	4527
chr3-137150288-137150836	9.56054e-12	0.336715	0.284	0.112	1.93422e-06	ENSMUST00000122064	Emcn	ENSMUSG00000054690	protein_coding	exon	chr3-137341067-137341312	chr3-137150288-137150836	190230
chr17-87202225-87202876	9.57927e-12	0.320462	0.14	0.036	1.93801e-06	ENSMUST00000024963	Mcfd2	ENSMUSG00000024150	protein_coding	utr	chr17-87254658-87255925	chr17-87202225-87202876	51781
chr5-124240954-124242191	9.71722e-12	0.314915	0.173	0.051	1.96592e-06	ENSMUST00000162812	Pitpnm2	ENSMUSG00000029406	protein_coding	gap	chr5-124216418-124249427	chr5-124240954-124242191	0
chr8-125066483-125068442	9.74507e-12	0.316118	0.416	0.202	1.97155e-06	ENSMUST00000122389	Disc1	ENSMUSG00000043051	protein_coding	gap	chr8-125054285-125087453	chr8-125066483-125068442	0
chr4-82435684-82436124	1.04602e-11	0.334196	0.225	0.086	2.11623e-06	ENSMUST00000148982	Nfib	ENSMUSG00000008575	protein_coding	gap	chr4-82383662-82498237	chr4-82435684-82436124	0
chr7-112696738-112697806	1.10644e-11	0.307058	0.238	0.086	2.23848e-06	ENSMUST00000172065	Tead1	ENSMUSG00000055320	protein_coding	gap	chr7-112679727-112759383	chr7-112696738-112697806	0
chr12-86770119-86770753	1.12968e-11	0.33986	0.287	0.125	2.28549e-06	ENSMUST00000095527	Lrrc74a	ENSMUSG00000059114	protein_coding	utr	chr12-86763624-86763795	chr12-86770119-86770753	6323
chr2-124858009-124859230	1.22282e-11	0.331769	0.354	0.158	2.47392e-06	ENSMUST00000137397	Gm13994	ENSMUSG00000087450	lincRNA	exon	chr2-124711013-124711083	chr2-124858009-124859230	146925
chr10-108538392-108538949	1.24076e-11	0.300469	0.098	0.009	2.51022e-06	ENSMUST00000105276	Syt1	ENSMUSG00000035864	protein_coding	gap	chr10-108504531-108583873	chr10-108538392-108538949	0
chr17-10390203-10391045	1.30941e-11	0.33614	0.276	0.11	2.6491e-06	ENSMUST00000041463	Pacrg	ENSMUSG00000037196	protein_coding	utr	chr17-10403012-10403317	chr17-10390203-10391045	11966
chr13-103082682-103083204	1.3236e-11	0.296046	0.08	0.006	2.67782e-06	ENSMUST00000194446	Mast4	ENSMUSG00000034751	protein_coding	gap	chr13-103025554-103096747	chr13-103082682-103083204	0
chr11-69410280-69411910	1.39505e-11	0.287581	0.447	0.206	2.82237e-06	ENSMUST00000094077	Kdm6b	ENSMUSG00000018476	protein_coding	gap	chr11-69408782-69413532	chr11-69410280-69411910	0
chr19-21376518-21377412	1.39667e-11	0.319927	0.109	0.015	2.82564e-06	ENSMUST00000087600	Gda	ENSMUSG00000058624	protein_coding	utr	chr19-21391307-21395187	chr19-21376518-21377412	13894
chr8-125624195-125624636	1.40692e-11	0.279308	0.083	0.006	2.84639e-06	ENSMUST00000053078	Map10	ENSMUSG00000050930	protein_coding	exon	chr8-125669818-125673359	chr8-125624195-125624636	45181
chr15-80559540-80561540	1.40736e-11	0.286196	0.129	0.036	2.84727e-06	ENSMUST00000096347	Enthd1	ENSMUSG00000050439	protein_coding	cds	chr15-80560004-80560352	chr15-80559540-80561540	0
chr3-27054733-27055039	1.42309e-11	0.281803	0.078	0.003	2.8791e-06	ENSMUST00000108300	Ect2	ENSMUSG00000027699	protein_coding	utr	chr3-27097222-27098398	chr3-27054733-27055039	42182
chr10-77434106-77435648	1.47498e-11	0.309627	0.145	0.028	2.98407e-06	ENSMUST00000098374	Adarb1	ENSMUSG00000020262	protein_coding	exon	chr10-77418095-77418270	chr10-77434106-77435648	15835
chr8-11340116-11341506	1.5353e-11	0.331034	0.212	0.068	3.10611e-06	ENSMUST00000033899	Col4a2	ENSMUSG00000031503	protein_coding	gap	chr8-11313685-11354276	chr8-11340116-11341506	0
chr14-14632249-14634286	1.59727e-11	0.323007	0.238	0.093	3.23149e-06	ENSMUST00000057015	Slc4a7	ENSMUSG00000021733	protein_coding	exon	chr14-14703025-14703280	chr14-14632249-14634286	68738
chr9-88277036-88277374	1.60559e-11	0.254257	0.067	0.001	3.24832e-06	ENSMUST00000190118	Gm28231	ENSMUSG00000100782	lincRNA	exon	chr9-88260697-88263035	chr9-88277036-88277374	14000
chr5-64224697-64225017	1.6057e-11	0.292315	0.093	0.009	3.24854e-06	ENSMUST00000147348	Tbc1d1	ENSMUSG00000029174	protein_coding	gap	chr5-64173897-64256714	chr5-64224697-64225017	0
chr3-149070075-149070652	1.66395e-11	0.30446	0.106	0.017	3.36639e-06	ENSMUST00000098518	Lphn2	ENSMUSG00000028184	protein_coding	exon	chr3-148988590-148989316	chr3-149070075-149070652	80758
chr3-122119903-122120569	1.67364e-11	0.344462	0.189	0.052	3.386e-06	ENSMUST00000013995	Abca4	ENSMUSG00000028125	protein_coding	cds	chr3-122120030-122120119	chr3-122119903-122120569	0
chr2-29643440-29643680	1.83121e-11	0.329193	0.214	0.068	3.70478e-06	ENSMUST00000147755	Rapgef1	ENSMUSG00000039844	protein_coding	gap	chr2-29620064-29679132	chr2-29643440-29643680	0
chr11-72434887-72436086	1.85666e-11	0.312306	0.132	0.022	3.75626e-06	ENSMUST00000108499	Ggt6	ENSMUSG00000040471	protein_coding	cds	chr11-72435619-72435764	chr11-72434887-72436086	0
chr9-74909196-74909568	1.85832e-11	0.315191	0.127	0.02	3.75962e-06	ENSMUST00000056006	Onecut1	ENSMUSG00000043013	protein_coding	utr	chr9-74889599-74891781	chr9-74909196-74909568	17414
chr16-45349525-45350192	1.90626e-11	0.342754	0.204	0.06	3.85662e-06	ENSMUST00000163230	Cd200	ENSMUSG00000022661	protein_coding	utr	chr16-45382135-45383457	chr16-45349525-45350192	31942
chr4-105290879-105291849	1.91888e-11	0.317328	0.147	0.033	3.88215e-06	ENSMUST00000064139	Ppap2b	ENSMUSG00000028517	protein_coding	utr	chr4-105231023-105232764	chr4-105290879-105291849	58114
chr8-126188559-126189448	1.93647e-11	0.312087	0.093	0.006	3.91774e-06	ENSMUST00000108759	Slc35f3	ENSMUSG00000057060	protein_coding	exon	chr8-126298558-126298861	chr8-126188559-126189448	109109
chr13-95659327-95659744	1.95991e-11	0.297372	0.111	0.023	3.96515e-06	ENSMUST00000068603	Iqgap2	ENSMUSG00000021676	protein_coding	gap	chr13-95657936-95660117	chr13-95659327-95659744	0
chr9-70942031-70943747	1.96193e-11	0.319125	0.261	0.099	3.96925e-06	ENSMUST00000034731	Lipc	ENSMUSG00000032207	protein_coding	exon	chr9-70934476-70934808	chr9-70942031-70943747	7222
chr1-159670631-159671253	1.98422e-11	0.329084	0.171	0.038	4.01434e-06	ENSMUST00000195199	Tnr	ENSMUSG00000015829	protein_coding	gap	chr1-159524216-159737510	chr1-159670631-159671253	0
chr13-56600333-56601818	2.08567e-11	0.308089	0.145	0.03	4.21958e-06	ENSMUST00000045173	Tgfbi	ENSMUSG00000035493	protein_coding	exon	chr13-56609603-56609780	chr13-56600333-56601818	7784
chr1-186261094-186261929	2.09694e-11	0.351259	0.173	0.049	4.24237e-06	ENSMUST00000195810	RP24-249K4.1	ENSMUSG00000103449	lincRNA	exon	chr1-186223491-186223789	chr1-186261094-186261929	37304
chr5-135879334-135880249	2.12031e-11	0.347919	0.23	0.08	4.28967e-06	ENSMUST00000144211	Srrm3	ENSMUSG00000039860	protein_coding	utr	chr5-135873309-135874772	chr5-135879334-135880249	4561
chr18-38928532-38930722	2.18605e-11	0.341741	0.331	0.147	4.42266e-06	ENSMUST00000134864	Fgf1	ENSMUSG00000036585	protein_coding	utr	chr18-38929106-38929157	chr18-38928532-38930722	0
chr15-53662808-53663280	2.19774e-11	0.288858	0.078	0.004	4.44632e-06	ENSMUST00000154119	Samd12	ENSMUSG00000058656	protein_coding	gap	chr15-53658491-53719644	chr15-53662808-53663280	0
chr6-28409857-28411358	2.20394e-11	0.320485	0.173	0.055	4.45885e-06	ENSMUST00000090511	Gcc1	ENSMUSG00000029708	protein_coding	utr	chr6-28416091-28417995	chr6-28409857-28411358	4732
chr15-58363141-58363757	2.23468e-11	0.319633	0.114	0.017	4.52104e-06	ENSMUST00000068515	Anxa13	ENSMUSG00000055114	protein_coding	gap	chr15-58356257-58364069	chr15-58363141-58363757	0
chr13-43684196-43685096	2.27167e-11	0.337021	0.243	0.08	4.59589e-06	ENSMUST00000059986	Rnf182	ENSMUSG00000044164	protein_coding	utr	chr13-43668719-43670945	chr13-43684196-43685096	13250
chr1-180312739-180313281	2.28299e-11	0.313334	0.199	0.06	4.61879e-06	ENSMUST00000070181	Itpkb	ENSMUSG00000038855	protein_coding	exon	chr1-180330485-180330779	chr1-180312739-180313281	17203
chr14-31946027-31946437	2.32656e-11	0.317219	0.147	0.036	4.70694e-06	ENSMUST00000143315	D830044D21Rik	ENSMUSG00000046005	lincRNA	exon	chr14-31928064-31929879	chr14-31946027-31946437	16147
chr6-48784761-48786231	2.34708e-11	0.249584	0.067	0.004	4.74844e-06	ENSMUST00000038811	Gimap3	ENSMUSG00000039264	protein_coding	exon	chr6-48766492-48766519	chr6-48784761-48786231	18241
chr8-46811090-46811652	2.40214e-11	0.303247	0.127	0.029	4.85984e-06	ENSMUST00000034041	Irf2	ENSMUSG00000031627	protein_coding	gap	chr8-46807752-46818790	chr8-46811090-46811652	0
chr11-94681669-94681952	2.501e-11	0.302436	0.114	0.02	5.05985e-06	ENSMUST00000126480	Gm11542	ENSMUSG00000085051	processed_transcript	gap	chr11-94678390-94686978	chr11-94681669-94681952	0
chr7-145024645-145025002	2.52684e-11	0.307255	0.137	0.03	5.11212e-06	ENSMUST00000093962	Ccnd1	ENSMUSG00000070348	protein_coding	exon	chr7-144939496-144939869	chr7-145024645-145025002	84775
chr6-117437561-117438507	2.58617e-11	0.329111	0.199	0.071	5.23216e-06	ENSMUST00000008011	Gm9946	ENSMUSG00000054488	lincRNA	exon	chr6-117559697-117559902	chr6-117437561-117438507	121189
chr16-30795402-30795935	2.62736e-11	0.332288	0.276	0.11	5.3155e-06	ENSMUST00000055389	Xxylt1	ENSMUSG00000047434	protein_coding	utr	chr16-30955627-30957337	chr16-30795402-30795935	159691
chr5-75650305-75650733	2.63438e-11	0.290533	0.093	0.01	5.3297e-06	ENSMUST00000148993	Kit	ENSMUSG00000005672	protein_coding	gap	chr5-75649670-75652549	chr5-75650305-75650733	0
chr10-54059211-54059470	2.69733e-11	0.3145	0.111	0.013	5.45705e-06	ENSMUST00000146483	Man1a	ENSMUSG00000003746	protein_coding	gap	chr10-54030795-54074415	chr10-54059211-54059470	0
chr11-69443227-69443816	2.73156e-11	0.328494	0.248	0.093	5.52629e-06	ENSMUST00000108659	Dnah2	ENSMUSG00000005237	protein_coding	gap	chr11-69437962-69446278	chr11-69443227-69443816	0
chr10-71409890-71410299	2.82818e-11	0.313695	0.145	0.032	5.72177e-06	ENSMUST00000145521	Ipmk	ENSMUSG00000060733	protein_coding	gap	chr10-71409448-71432890	chr10-71409890-71410299	0
chr11-115964950-115965537	2.86544e-11	0.336494	0.295	0.128	5.79715e-06	ENSMUST00000140991	Sap30bp	ENSMUSG00000020755	protein_coding	utr	chr11-115964393-115966725	chr11-115964950-115965537	0
chr5-100636805-100637686	2.90085e-11	0.314804	0.15	0.041	5.8688e-06	ENSMUST00000031262	Coq2	ENSMUSG00000029319	protein_coding	utr	chr5-100654723-100655297	chr5-100636805-100637686	17036
chr10-41997587-41998242	2.99408e-11	0.343713	0.176	0.049	6.05742e-06	ENSMUST00000161927	Armc2	ENSMUSG00000071324	protein_coding	gap	chr10-41993229-42000329	chr10-41997587-41998242	0
chr8-120563307-120564795	3.06343e-11	0.322686	0.351	0.149	6.19772e-06	ENSMUST00000127664	Gm20388	ENSMUSG00000092329	protein_coding	gap	chr8-119910940-124295357	chr8-120563307-120564795	0
chr19-57211496-57212212	3.11296e-11	0.3315	0.261	0.104	6.29793e-06	ENSMUST00000156316	Ablim1	ENSMUSG00000025085	protein_coding	gap	chr19-57173460-57314692	chr19-57211496-57212212	0
chr11-113729969-113730255	3.23991e-11	0.298837	0.132	0.028	6.55477e-06	ENSMUST00000153453	Cdc42ep4	ENSMUSG00000041598	protein_coding	gap	chr11-113729666-113750953	chr11-113729969-113730255	0
chr1-133891563-133891803	3.36498e-11	0.298471	0.093	0.012	6.8078e-06	ENSMUST00000124051	Optc	ENSMUSG00000010311	protein_coding	utr	chr1-133897199-133897799	chr1-133891563-133891803	5395
chr15-38938261-38939078	3.46708e-11	0.337891	0.264	0.081	7.01436e-06	ENSMUST00000181362	Gm26704	ENSMUSG00000097875	lincRNA	gap	chr15-38726902-39003498	chr15-38938261-38939078	0
chr1-180302052-180303049	3.6546e-11	0.328488	0.14	0.041	7.39372e-06	ENSMUST00000070181	Itpkb	ENSMUSG00000038855	protein_coding	exon	chr1-180330485-180330779	chr1-180302052-180303049	27435
chr10-121443886-121444383	3.70814e-11	0.288016	0.103	0.013	7.50205e-06	ENSMUST00000026902	Rassf3	ENSMUSG00000025795	protein_coding	gap	chr10-121417193-121476002	chr10-121443886-121444383	0
chr6-92987418-92988854	3.889e-11	0.315196	0.181	0.052	7.86796e-06	ENSMUST00000181840	9530026P05Rik	ENSMUSG00000097462	lincRNA	gap	chr6-92940810-93107066	chr6-92987418-92988854	0
chr6-117651787-117652391	3.91938e-11	0.322485	0.109	0.022	7.92942e-06	ENSMUST00000190546	1700030F04Rik	ENSMUSG00000099869	lincRNA	gap	chr6-117647764-117702621	chr6-117651787-117652391	0
chr18-82920404-82921156	4.08196e-11	0.321414	0.15	0.038	8.25834e-06	ENSMUST00000171238	Zfp516	ENSMUSG00000058881	protein_coding	gap	chr18-82910993-82955523	chr18-82920404-82921156	0
chr2-180215984-180216266	4.12174e-11	0.311416	0.22	0.081	8.33883e-06	ENSMUST00000015791	Lama5	ENSMUSG00000015647	protein_coding	gap	chr2-180208372-180221225	chr2-180215984-180216266	0
chr12-79600008-79600729	4.1549e-11	0.324452	0.191	0.054	8.4059e-06	ENSMUST00000079533	Rad51b	ENSMUSG00000059060	protein_coding	utr	chr12-79507730-79508656	chr12-79600008-79600729	91351
chr19-55231772-55232844	4.36301e-11	0.329832	0.227	0.075	8.82694e-06	ENSMUST00000069183	Gucy2g	ENSMUSG00000055523	protein_coding	gap	chr19-55231160-55233038	chr19-55231772-55232844	0
chr15-6259590-6260667	4.37674e-11	0.337227	0.183	0.041	8.85472e-06	ENSMUST00000078019	Dab2	ENSMUSG00000022150	protein_coding	exon	chr15-6299788-6299899	chr15-6259590-6260667	39120
chr18-57836750-57837694	4.3822e-11	0.310408	0.098	0.013	8.86576e-06	ENSMUST00000115366	Slc12a2	ENSMUSG00000024597	protein_coding	exon	chr18-57878678-57879544	chr18-57836750-57837694	40983
chr19-55244593-55245348	4.40208e-11	0.310163	0.282	0.113	8.90597e-06	ENSMUST00000069183	Gucy2g	ENSMUSG00000055523	protein_coding	exon	chr19-55240853-55241236	chr19-55244593-55245348	3356
chr7-98390460-98391900	4.65395e-11	0.294843	0.109	0.017	9.41555e-06	ENSMUST00000165257	Tsku	ENSMUSG00000049580	protein_coding	exon	chr7-98361278-98361328	chr7-98390460-98391900	29131
chr4-148675896-148677167	4.72152e-11	0.316433	0.31	0.138	9.55224e-06	ENSMUST00000105698	Gm572	ENSMUSG00000070577	protein_coding	utr	chr4-148671429-148671572	chr4-148675896-148677167	4323
chr13-41662159-41663810	4.85203e-11	0.335956	0.326	0.152	9.81629e-06	ENSMUST00000067176	Gm5082	ENSMUSG00000054258	protein_coding	utr	chr13-41656429-41656524	chr13-41662159-41663810	5634
chr1-90908997-90910164	5.05653e-11	0.305301	0.124	0.026	1.023e-05	ENSMUST00000027528	Mlph	ENSMUSG00000026303	protein_coding	exon	chr1-90915085-90915253	chr1-90908997-90910164	4920
chr2-155878694-155879658	5.1741e-11	0.299045	0.119	0.017	1.04679e-05	ENSMUST00000152818	Uqcc1	ENSMUSG00000005882	protein_coding	gap	chr2-155858132-155911745	chr2-155878694-155879658	0
chr18-62849294-62849641	5.21025e-11	0.281574	0.088	0.009	1.0541e-05	ENSMUST00000096554	Apcdd1	ENSMUSG00000071847	protein_coding	exon	chr18-62922327-62922721	chr18-62849294-62849641	72685
chr19-57266772-57267058	5.25453e-11	0.262833	0.065	0.003	1.06306e-05	ENSMUST00000156316	Ablim1	ENSMUSG00000025085	protein_coding	gap	chr19-57173460-57314692	chr19-57266772-57267058	0
chr13-49178536-49179426	5.30616e-11	0.316332	0.171	0.057	1.0735e-05	ENSMUST00000049022	Ninj1	ENSMUSG00000037966	protein_coding	exon	chr13-49187485-49187637	chr13-49178536-49179426	8058
chr10-102690029-102690319	5.32055e-11	0.322738	0.101	0.01	1.07642e-05	ENSMUST00000055355	Rassf9	ENSMUSG00000044921	protein_coding	utr	chr10-102546067-102546560	chr10-102690029-102690319	143468
chr11-9126168-9127005	5.3491e-11	0.303519	0.129	0.028	1.08219e-05	ENSMUST00000172452	Upp1	ENSMUSG00000020407	protein_coding	gap	chr11-9125699-9129487	chr11-9126168-9127005	0
chr10-99576300-99576681	5.41339e-11	0.308754	0.127	0.025	1.0952e-05	ENSMUST00000167243	Gad1-ps	ENSMUSG00000090665	protein_coding	utr	chr10-99445819-99447007	chr10-99576300-99576681	129292
chr3-37757741-37759087	5.42755e-11	0.323776	0.307	0.144	1.09806e-05	ENSMUST00000099128	Gm5148	ENSMUSG00000058174	protein_coding	exon	chr3-37724203-37724490	chr3-37757741-37759087	33250
chr10-97442410-97442655	5.43367e-11	0.247924	0.062	0.001	1.0993e-05	ENSMUST00000105287	Dcn	ENSMUSG00000019929	protein_coding	exon	chr10-97479500-97479789	chr10-97442410-97442655	36844
chr2-118659012-118660279	5.54546e-11	0.322636	0.238	0.089	1.12192e-05	ENSMUST00000099557	Pak6	ENSMUSG00000074923	protein_coding	exon	chr2-118663303-118664023	chr2-118659012-118660279	3023
chr5-111508771-111511170	5.54565e-11	0.320513	0.251	0.096	1.12196e-05	ENSMUST00000094463	Mn1	ENSMUSG00000070576	protein_coding	utr	chr5-111454792-111457033	chr5-111508771-111511170	51737
chr18-38617128-38617588	5.58044e-11	0.328503	0.152	0.036	1.129e-05	ENSMUST00000145090	Arhgap26	ENSMUSG00000036452	protein_coding	gap	chr18-38601698-38617609	chr18-38617128-38617588	0
chr6-72528240-72528880	5.61879e-11	0.314818	0.14	0.023	1.13675e-05	ENSMUST00000160761	Sh2d6	ENSMUSG00000052631	protein_coding	exon	chr6-72521526-72521634	chr6-72528240-72528880	6605
chr7-112823545-112824070	5.67986e-11	0.33866	0.256	0.096	1.14911e-05	ENSMUST00000172065	Tead1	ENSMUSG00000055320	protein_coding	gap	chr7-112759640-112839415	chr7-112823545-112824070	0
chr8-123141659-123142586	5.73564e-11	0.306759	0.217	0.073	1.16039e-05	ENSMUST00000127664	Gm20388	ENSMUSG00000092329	protein_coding	gap	chr8-119910940-124295357	chr8-123141659-123142586	0
chr14-20618165-20618801	5.80478e-11	0.328566	0.147	0.039	1.17438e-05	ENSMUST00000035340	Usp54	ENSMUSG00000034235	protein_coding	utr	chr14-20618293-20618354	chr14-20618165-20618801	0
chr12-108303774-108304242	5.8127e-11	0.305273	0.098	0.013	1.17599e-05	ENSMUST00000021685	Hhipl1	ENSMUSG00000021260	protein_coding	exon	chr12-108306270-108306683	chr12-108303774-108304242	2027
chr2-152727961-152728388	5.93571e-11	0.340159	0.163	0.042	1.20087e-05	ENSMUST00000038368	Id1	ENSMUSG00000042745	protein_coding	exon	chr2-152736251-152736745	chr2-152727961-152728388	7862
chr10-12878565-12879012	5.94233e-11	0.324927	0.15	0.035	1.20221e-05	ENSMUST00000076817	Utrn	ENSMUSG00000019820	protein_coding	exon	chr10-12861568-12861735	chr10-12878565-12879012	16829
chr13-8866678-8866986	6.19701e-11	0.326294	0.109	0.019	1.25374e-05	ENSMUST00000177404	Wdr37	ENSMUSG00000021147	protein_coding	gap	chr13-8861266-8870636	chr13-8866678-8866986	0
chr16-30939906-30940231	6.23164e-11	0.302769	0.147	0.041	1.26074e-05	ENSMUST00000055389	Xxylt1	ENSMUSG00000047434	protein_coding	utr	chr16-30955627-30957337	chr16-30939906-30940231	15395
chr1-64305155-64305926	6.31885e-11	0.32205	0.313	0.139	1.27839e-05	ENSMUST00000190863	Gm28981	ENSMUSG00000101895	lincRNA	exon	chr1-64303007-64303043	chr1-64305155-64305926	2111
chr10-77234712-77235593	6.35881e-11	0.324857	0.178	0.051	1.28647e-05	ENSMUST00000105408	Gm10941	ENSMUSG00000078444	protein_coding	utr	chr10-77257776-77257986	chr10-77234712-77235593	22182
chr10-120627946-120628493	6.45605e-11	0.315718	0.132	0.025	1.30614e-05	ENSMUST00000056994	4921513I03Rik	ENSMUSG00000044544	protein_coding	exon	chr10-120765774-120765838	chr10-120627946-120628493	137280
chr16-34347518-34347848	6.73518e-11	0.322331	0.098	0.015	1.36261e-05	ENSMUST00000151491	Kalrn	ENSMUSG00000061751	protein_coding	gap	chr16-34332247-34356884	chr16-34347518-34347848	0
chr16-30835473-30836312	6.8526e-11	0.314233	0.176	0.048	1.38637e-05	ENSMUST00000055389	Xxylt1	ENSMUSG00000047434	protein_coding	utr	chr16-30955627-30957337	chr16-30835473-30836312	119314
chr19-26892616-26893283	6.90281e-11	0.34081	0.121	0.022	1.39653e-05	ENSMUST00000099536	Gm815	ENSMUSG00000074913	protein_coding	utr	chr19-26888432-26888639	chr19-26892616-26893283	3976
chr16-32665927-32666616	6.93106e-11	0.316603	0.121	0.022	1.40224e-05	ENSMUST00000115126	Tnk2	ENSMUSG00000022791	protein_coding	cds	chr16-32665886-32665956	chr16-32665927-32666616	0
chr6-100180761-100181239	7.11722e-11	0.300778	0.096	0.013	1.43991e-05	ENSMUST00000101118	Rybp	ENSMUSG00000072872	protein_coding	utr	chr6-100228566-100232172	chr6-100180761-100181239	47326
chr3-145101828-145102517	7.2486e-11	0.338632	0.24	0.093	1.46649e-05	ENSMUST00000040465	Clca5	ENSMUSG00000036960	protein_coding	exon	chr3-145098779-145099104	chr3-145101828-145102517	2723
chr2-167383165-167384065	7.52407e-11	0.305551	0.173	0.052	1.52222e-05	ENSMUST00000109221	B4galt5	ENSMUSG00000017929	protein_coding	exon	chr2-167348918-167349183	chr2-167383165-167384065	33981
chr5-32328047-32328437	7.79248e-11	0.280473	0.101	0.012	1.57652e-05	ENSMUST00000101377	Plb1	ENSMUSG00000029134	protein_coding	cds	chr5-32328412-32328492	chr5-32328047-32328437	0
chr6-73070541-73071039	7.94776e-11	0.306414	0.152	0.033	1.60793e-05	ENSMUST00000114040	Dnah6	ENSMUSG00000052861	protein_coding	cds	chr6-73070487-73070651	chr6-73070541-73071039	0
chr16-95860406-95861676	8.00805e-11	0.313171	0.302	0.136	1.62013e-05	ENSMUST00000136744	1600002D24Rik	ENSMUSG00000086899	lincRNA	gap	chr16-95843258-95897983	chr16-95860406-95861676	0
chr7-83809135-83810674	8.26883e-11	0.322594	0.302	0.136	1.67289e-05	ENSMUST00000011298	1700026D08Rik	ENSMUSG00000011154	protein_coding	exon	chr7-83794742-83794880	chr7-83809135-83810674	14254
chr5-75574534-75576207	8.28881e-11	0.321643	0.212	0.078	1.67693e-05	ENSMUST00000144270	Kit	ENSMUSG00000005672	protein_coding	cds	chr5-75575016-75575118	chr5-75574534-75576207	0
chr16-87660829-87661980	8.33503e-11	0.307745	0.37	0.186	1.68629e-05	ENSMUST00000026703	Bach1	ENSMUSG00000025612	protein_coding	exon	chr16-87698945-87699056	chr16-87660829-87661980	36964
chr14-32072875-32074147	8.49704e-11	0.302874	0.256	0.109	1.71906e-05	ENSMUST00000022461	Dph3	ENSMUSG00000021905	protein_coding	utr	chr14-32080566-32081269	chr14-32072875-32074147	6418
chr18-43359756-43360890	8.53281e-11	0.33389	0.142	0.029	1.7263e-05	ENSMUST00000121805	Dpysl3	ENSMUSG00000024501	protein_coding	gap	chr18-43358399-43360961	chr18-43359756-43360890	0
chr13-37505780-37506438	8.81558e-11	0.313579	0.264	0.099	1.78351e-05	ENSMUST00000190396	Gm29590	ENSMUSG00000100022	lincRNA	exon	chr13-37508940-37509348	chr13-37505780-37506438	2501
chr7-130968263-130969461	8.85583e-11	0.28837	0.119	0.026	1.79165e-05	ENSMUST00000153290	Htra1	ENSMUSG00000006205	protein_coding	gap	chr7-130962178-130979300	chr7-130968263-130969461	0
chr7-34255139-34255398	8.87226e-11	0.330686	0.142	0.028	1.79497e-05	ENSMUST00000108074	4931406P16Rik	ENSMUSG00000066571	protein_coding	gap	chr7-34254085-34256411	chr7-34255139-34255398	0
chr5-137659897-137660476	8.87336e-11	0.324964	0.127	0.02	1.7952e-05	ENSMUST00000151839	Agfg2	ENSMUSG00000029722	protein_coding	cds	chr5-137660162-137660194	chr5-137659897-137660476	0
chr8-11322662-11323856	9.27508e-11	0.313202	0.204	0.061	1.87647e-05	ENSMUST00000033899	Col4a2	ENSMUSG00000031503	protein_coding	gap	chr8-11313685-11354276	chr8-11322662-11323856	0
chr12-8400227-8400687	9.28075e-11	0.334089	0.134	0.023	1.87762e-05	ENSMUST00000020927	Hs1bp3	ENSMUSG00000020605	protein_coding	utr	chr12-8342088-8343824	chr12-8400227-8400687	56402
chr12-73793721-73794603	9.28144e-11	0.317882	0.145	0.029	1.87776e-05	ENSMUST00000021527	Prkch	ENSMUSG00000021108	protein_coding	utr	chr12-73777059-73778185	chr12-73793721-73794603	15535
chr1-90439862-90440323	9.34494e-11	0.291497	0.119	0.015	1.8906e-05	ENSMUST00000187630	Gm28722	ENSMUSG00000101997	lincRNA	exon	chr1-90453394-90454264	chr1-90439862-90440323	13070
chr8-24568284-24568927	9.41522e-11	0.321382	0.147	0.03	1.90482e-05	ENSMUST00000121992	Ido2	ENSMUSG00000031549	protein_coding	gap	chr8-24558244-24576149	chr8-24568284-24568927	0
chr15-97581347-97582182	9.5331e-11	0.315928	0.276	0.113	1.92867e-05	ENSMUST00000023104	Rpap3	ENSMUSG00000022466	protein_coding	utr	chr15-97675105-97675293	chr15-97581347-97582182	92922
chr14-18387019-18387502	9.62361e-11	0.270475	0.08	0.004	1.94698e-05	ENSMUST00000022296	Ube2e1	ENSMUSG00000021774	protein_coding	exon	chr14-18331687-18331859	chr14-18387019-18387502	55159
chr11-106737144-106737504	9.62889e-11	0.313221	0.142	0.036	1.94805e-05	ENSMUST00000068021	Pecam1	ENSMUSG00000020717	protein_coding	gap	chr11-106715185-106750142	chr11-106737144-106737504	0
chr8-105957786-105958282	1.01086e-10	0.315216	0.121	0.022	2.04509e-05	ENSMUST00000132231	Slc12a4	ENSMUSG00000017765	protein_coding	gap	chr8-105955728-105959357	chr8-105957786-105958282	0
chr14-25377311-25379236	1.03025e-10	0.300135	0.362	0.17	2.08432e-05	ENSMUST00000181582	Gm26660	ENSMUSG00000097601	lincRNA	gap	chr14-25358142-25378433	chr14-25377311-25379236	0
chr2-36104997-36105698	1.07157e-10	0.296896	0.116	0.02	2.16793e-05	ENSMUST00000112967	Lhx6	ENSMUSG00000026890	protein_coding	cds	chr2-36105124-36105207	chr2-36104997-36105698	0
chr14-8356869-8357350	1.07497e-10	0.253415	0.065	0.003	2.1748e-05	ENSMUST00000022269	Oit1	ENSMUSG00000021749	protein_coding	cds	chr14-8357110-8357168	chr14-8356869-8357350	0
chr5-75640345-75641166	1.08126e-10	0.296624	0.147	0.038	2.18753e-05	ENSMUST00000144270	Kit	ENSMUSG00000005672	protein_coding	cds	chr5-75641110-75641214	chr5-75640345-75641166	0
chr19-21105875-21106743	1.08795e-10	0.306577	0.186	0.052	2.20107e-05	ENSMUST00000039500	Tmc1	ENSMUSG00000024749	protein_coding	exon	chr19-20954144-20954202	chr19-21105875-21106743	151672
chr19-7339020-7342302	1.09164e-10	0.29934	0.45	0.235	2.20853e-05	ENSMUST00000171721	Mark2	ENSMUSG00000024969	protein_coding	cds	chr19-7341168-7341192	chr19-7339020-7342302	0
chr10-66928103-66928894	1.11244e-10	0.312194	0.127	0.028	2.25061e-05	ENSMUST00000181018	Gm26576	ENSMUSG00000097921	lincRNA	exon	chr10-66922849-66923599	chr10-66928103-66928894	4503
chr10-94480303-94481071	1.11478e-10	0.336198	0.243	0.087	2.25534e-05	ENSMUST00000132743	Tmcc3	ENSMUSG00000020023	protein_coding	gap	chr10-94430640-94578422	chr10-94480303-94481071	0
chr2-31179449-31180605	1.13202e-10	0.316664	0.137	0.03	2.29022e-05	ENSMUST00000172422	Gpr107	ENSMUSG00000000194	protein_coding	gap	chr2-31178388-31183579	chr2-31179449-31180605	0
chr8-118444692-118445093	1.13874e-10	0.282822	0.078	0.006	2.30382e-05	ENSMUST00000148836	Cdh13	ENSMUSG00000031841	protein_coding	gap	chr8-118283899-118505603	chr8-118444692-118445093	0
chr16-13378045-13378473	1.18513e-10	0.331909	0.134	0.032	2.39768e-05	ENSMUST00000149359	Mkl2	ENSMUSG00000009569	protein_coding	cds	chr16-13378264-13378329	chr16-13378045-13378473	0
chr5-130023222-130024608	1.21592e-10	0.299784	0.284	0.12	2.45996e-05	ENSMUST00000161884	Asl	ENSMUSG00000025533	protein_coding	cds	chr5-130024042-130024053	chr5-130023222-130024608	0
chr5-76111078-76111412	1.22382e-10	0.279338	0.072	0.003	2.47595e-05	ENSMUST00000031143	Srd5a3	ENSMUSG00000029233	protein_coding	exon	chr5-76140271-76140548	chr5-76111078-76111412	28858
chr16-97309678-97310751	1.23035e-10	0.316781	0.127	0.028	2.48917e-05	ENSMUST00000047275	Bace2	ENSMUSG00000040605	protein_coding	exon	chr16-97356728-97357101	chr16-97309678-97310751	45976
chr7-132423575-132423942	1.25451e-10	0.277897	0.075	0.004	2.53803e-05	ENSMUST00000124096	Fgfr2	ENSMUSG00000030849	protein_coding	gap	chr7-130172940-133081756	chr7-132423575-132423942	0
chr15-76219016-76219415	1.2576e-10	0.280348	0.101	0.015	2.54429e-05	ENSMUST00000167754	Plec	ENSMUSG00000022565	protein_coding	gap	chr15-76194813-76231173	chr15-76219016-76219415	0
chr3-151323816-151324186	1.26615e-10	0.329231	0.183	0.048	2.56158e-05	ENSMUST00000046977	Eltd1	ENSMUSG00000039167	protein_coding	exon	chr3-151437887-151438004	chr3-151323816-151324186	113700
chr9-75927282-75928323	1.3279e-10	0.308897	0.098	0.015	2.68651e-05	ENSMUST00000012281	Bmp5	ENSMUSG00000032179	protein_coding	utr	chr9-75898583-75900310	chr9-75927282-75928323	26971
chr1-191946234-191946620	1.35568e-10	0.309401	0.163	0.052	2.74272e-05	ENSMUST00000180463	Rd3	ENSMUSG00000049353	protein_coding	exon	chr1-191977370-191977709	chr1-191946234-191946620	30749
chr2-154185253-154186152	1.36651e-10	0.324002	0.137	0.019	2.76463e-05	ENSMUST00000081816	Bpifb1	ENSMUSG00000027485	protein_coding	exon	chr2-154190818-154190893	chr2-154185253-154186152	4665
chr4-134252312-134252790	1.37043e-10	0.337739	0.189	0.055	2.77255e-05	ENSMUST00000138366	Grrp1	ENSMUSG00000050105	protein_coding	gap	chr4-134252259-134252974	chr4-134252312-134252790	0
chr12-86659416-86659989	1.38695e-10	0.255442	0.07	0.006	2.80599e-05	ENSMUST00000021681	Vash1	ENSMUSG00000021256	protein_coding	exon	chr12-86678700-86680326	chr12-86659416-86659989	18710
chr7-113151424-113151858	1.40431e-10	0.295033	0.124	0.029	2.8411e-05	ENSMUST00000158046	Gm23662	ENSMUSG00000088671	rRNA	exon	chr7-113119698-113119808	chr7-113151424-113151858	31615
chr7-27231548-27232207	1.43039e-10	0.315528	0.145	0.026	2.89387e-05	ENSMUST00000003860	Adck4	ENSMUSG00000003762	protein_coding	exon	chr7-27233023-27233173	chr7-27231548-27232207	815
chr19-46459261-46460257	1.43213e-10	0.294323	0.116	0.022	2.89739e-05	ENSMUST00000123252	Sufu	ENSMUSG00000025231	protein_coding	gap	chr19-46457978-46473571	chr19-46459261-46460257	0
chr15-38709418-38711106	1.49363e-10	0.318034	0.168	0.054	3.0218e-05	ENSMUST00000181362	Gm26704	ENSMUSG00000097875	lincRNA	exon	chr15-38726869-38726901	chr15-38709418-38711106	15762
chr8-126797186-126798149	1.49738e-10	0.313626	0.248	0.107	3.0294e-05	ENSMUST00000179857	Tomm20	ENSMUSG00000093904	protein_coding	utr	chr8-126930664-126935014	chr8-126797186-126798149	132514
chr3-98074944-98075285	1.56671e-10	0.266415	0.078	0.006	3.16966e-05	ENSMUST00000079812	Notch2	ENSMUSG00000027878	protein_coding	gap	chr3-98072923-98081916	chr3-98074944-98075285	0
chr10-54032211-54032975	1.594e-10	0.292784	0.083	0.009	3.22488e-05	ENSMUST00000146483	Man1a	ENSMUSG00000003746	protein_coding	gap	chr10-54030795-54074415	chr10-54032211-54032975	0
chr11-114352071-114352717	1.63882e-10	0.25997	0.065	0.003	3.31555e-05	ENSMUST00000148405	4932435O22Rik	ENSMUSG00000062391	lincRNA	exon	chr11-114413401-114416350	chr11-114352071-114352717	60683
chr11-70585433-70585694	1.66509e-10	0.296902	0.119	0.019	3.36869e-05	ENSMUST00000102559	Mink1	ENSMUSG00000020827	protein_coding	gap	chr11-70563127-70597167	chr11-70585433-70585694	0
chr16-59558878-59560248	1.68425e-10	0.32475	0.189	0.054	3.40745e-05	ENSMUST00000172910	Gm9581	ENSMUSG00000091562	processed_transcript	gap	chr16-59560243-59565212	chr16-59558878-59560248	0
chr8-106399646-106400072	1.69565e-10	0.283646	0.098	0.013	3.43052e-05	ENSMUST00000180410	Gm26786	ENSMUSG00000097026	lincRNA	gap	chr8-106237924-106419506	chr8-106399646-106400072	0
chr5-113208601-113210436	1.71056e-10	0.306674	0.323	0.144	3.46069e-05	ENSMUST00000086615	Tmem211	ENSMUSG00000066964	protein_coding	exon	chr5-113226909-113227001	chr5-113208601-113210436	16472
chr2-4260425-4260982	1.73826e-10	0.293071	0.083	0.009	3.51673e-05	ENSMUST00000177457	Frmd4a	ENSMUSG00000026657	protein_coding	gap	chr2-4018583-4431198	chr2-4260425-4260982	0
chr10-68136141-68137020	1.75703e-10	0.331155	0.295	0.122	3.5547e-05	ENSMUST00000020106	Arid5b	ENSMUSG00000019947	protein_coding	gap	chr10-68135107-68186025	chr10-68136141-68137020	0
chr13-23432341-23433185	1.79977e-10	0.330109	0.351	0.161	3.64117e-05	ENSMUST00000141543	C230035I16Rik	ENSMUSG00000085024	lincRNA	exon	chr13-23430710-23431022	chr13-23432341-23433185	1318
chr14-31669024-31670366	1.82198e-10	0.296182	0.318	0.141	3.68609e-05	ENSMUST00000090147	Btd	ENSMUSG00000021900	protein_coding	utr	chr14-31667914-31668579	chr14-31669024-31670366	444
chr13-56634833-56635334	1.82686e-10	0.301025	0.111	0.019	3.69597e-05	ENSMUST00000045173	Tgfbi	ENSMUSG00000035493	protein_coding	gap	chr13-56632990-56635565	chr13-56634833-56635334	0
chr13-28931154-28932092	1.90021e-10	0.307235	0.142	0.028	3.84437e-05	ENSMUST00000180992	Gm26735	ENSMUSG00000097461	lincRNA	exon	chr13-28943048-28943080	chr13-28931154-28932092	10955
chr8-3327114-3328392	1.91165e-10	0.303638	0.111	0.016	3.86753e-05	ENSMUST00000098966	A430078G23Rik	ENSMUSG00000074497	protein_coding	exon	chr8-3353415-3353730	chr8-3327114-3328392	25022
chr5-114189027-114189334	1.94368e-10	0.254619	0.067	0.004	3.93231e-05	ENSMUST00000146841	Acacb	ENSMUSG00000042010	protein_coding	gap	chr5-114188470-114190075	chr5-114189027-114189334	0
chr3-95893172-95894709	2.00393e-10	0.295642	0.429	0.224	4.05422e-05	ENSMUST00000056710	Aph1a	ENSMUSG00000015750	protein_coding	cds	chr3-95894171-95894283	chr3-95893172-95894709	0
chr7-113150704-113151139	2.01222e-10	0.322865	0.15	0.038	4.07098e-05	ENSMUST00000158046	Gm23662	ENSMUSG00000088671	rRNA	exon	chr7-113119698-113119808	chr7-113150704-113151139	30895
chr5-114198799-114200001	2.01492e-10	0.313063	0.155	0.033	4.07644e-05	ENSMUST00000102582	Acacb	ENSMUSG00000042010	protein_coding	gap	chr5-114198341-114200239	chr5-114198799-114200001	0
chr2-32661239-32662134	2.04992e-10	0.321072	0.313	0.148	4.14726e-05	ENSMUST00000167841	Eng	ENSMUSG00000026814	protein_coding	gap	chr2-32657671-32669422	chr2-32661239-32662134	0
chr2-35613902-35614746	2.06151e-10	0.328421	0.147	0.033	4.17071e-05	ENSMUST00000135741	Dab2ip	ENSMUSG00000026883	protein_coding	gap	chr2-35583050-35643887	chr2-35613902-35614746	0
chr5-122396774-122397196	2.10782e-10	0.290994	0.24	0.094	4.26439e-05	ENSMUST00000102525	Arpc3	ENSMUSG00000029465	protein_coding	cds	chr5-122396817-122396916	chr5-122396774-122397196	0
chr4-55077008-55078523	2.1547e-10	0.302106	0.101	0.01	4.35924e-05	ENSMUST00000098070	Zfp462	ENSMUSG00000060206	protein_coding	gap	chr4-55073106-55079263	chr4-55077008-55078523	0
chr8-12905278-12906037	2.17538e-10	0.315506	0.245	0.093	4.40107e-05	ENSMUST00000095456	Mcf2l	ENSMUSG00000031442	protein_coding	gap	chr8-12880151-12963163	chr8-12905278-12906037	0
chr11-40446898-40447235	2.19773e-10	0.24095	0.059	0.001	4.44629e-05	ENSMUST00000123904	3110004A20Rik	ENSMUSG00000085588	lincRNA	exon	chr11-40474718-40474964	chr11-40446898-40447235	27482
chr10-94426025-94427185	2.19852e-10	0.32013	0.243	0.097	4.44789e-05	ENSMUST00000147869	Tmcc3	ENSMUSG00000020023	protein_coding	gap	chr10-94312203-94430522	chr10-94426025-94427185	0
chr2-92987742-92988675	2.28021e-10	0.321587	0.24	0.084	4.61316e-05	ENSMUST00000178666	Prdm11	ENSMUSG00000075028	protein_coding	gap	chr2-92980699-92993363	chr2-92987742-92988675	0
chr7-65417129-65417944	2.29948e-10	0.300036	0.127	0.026	4.65214e-05	ENSMUST00000102592	Tjp1	ENSMUSG00000030516	protein_coding	exon	chr7-65370810-65371239	chr7-65417129-65417944	45889
chr5-76013758-76014424	2.32871e-10	0.307647	0.212	0.07	4.71128e-05	ENSMUST00000158856	Gm24738	ENSMUSG00000089481	rRNA	exon	chr5-76006319-76006441	chr5-76013758-76014424	7316
chr2-35322504-35323154	2.3683e-10	0.317921	0.098	0.009	4.79137e-05	ENSMUST00000028241	Stom	ENSMUSG00000026880	protein_coding	gap	chr2-35321687-35323663	chr2-35322504-35323154	0
chr18-75454730-75457153	2.38044e-10	0.321633	0.202	0.067	4.81593e-05	ENSMUST00000165559	Ctif	ENSMUSG00000052928	protein_coding	gap	chr18-75437225-75471864	chr18-75454730-75457153	0
chr7-139359644-139360208	2.43215e-10	0.294593	0.147	0.042	4.92056e-05	ENSMUST00000106098	Inpp5a	ENSMUSG00000025477	protein_coding	exon	chr7-139389109-139389464	chr7-139359644-139360208	28900
chr15-12490380-12491345	2.43891e-10	0.297411	0.116	0.022	4.93423e-05	ENSMUST00000190929	Pdzd2	ENSMUSG00000022197	protein_coding	gap	chr15-12458300-12545489	chr15-12490380-12491345	0
chr6-136938456-136939127	2.45216e-10	0.289687	0.16	0.052	4.96105e-05	ENSMUST00000154440	Arhgdib	ENSMUSG00000030220	protein_coding	gap	chr6-136935147-136939510	chr6-136938456-136939127	0
chr16-49938922-49939216	2.48558e-10	0.256514	0.065	0.004	5.02866e-05	ENSMUST00000084838	Cd47	ENSMUSG00000055447	protein_coding	utr	chr16-49910878-49915010	chr16-49938922-49939216	23911
chr12-8344674-8345459	2.50192e-10	0.32213	0.186	0.058	5.06171e-05	ENSMUST00000020927	Hs1bp3	ENSMUSG00000020605	protein_coding	utr	chr12-8342088-8343824	chr12-8344674-8345459	849
chr8-46982722-46983017	2.54014e-10	0.306233	0.109	0.019	5.13904e-05	ENSMUST00000140149	Enpp6	ENSMUSG00000038173	protein_coding	exon	chr8-46986925-46987211	chr8-46982722-46983017	3907
chr15-78832220-78833124	2.54021e-10	0.317274	0.344	0.168	5.13918e-05	ENSMUST00000059619	Cdc42ep1	ENSMUSG00000049521	protein_coding	exon	chr15-78842647-78842725	chr15-78832220-78833124	9522
chr10-68794636-68795902	2.60181e-10	0.290769	0.137	0.038	5.26381e-05	ENSMUST00000080995	Tmem26	ENSMUSG00000060044	protein_coding	utr	chr10-68778858-68782654	chr10-68794636-68795902	11981
chr7-45679567-45680263	2.74965e-10	0.303533	0.266	0.107	5.5629e-05	ENSMUST00000040636	Sec1	ENSMUSG00000040364	protein_coding	gap	chr7-45679525-45684179	chr7-45679567-45680263	0
chr8-94983646-94984476	2.75536e-10	0.301021	0.202	0.075	5.57445e-05	ENSMUST00000093271	Gpr56	ENSMUSG00000031785	protein_coding	utr	chr8-94984399-94984657	chr8-94983646-94984476	0
chr13-104062068-104062963	2.77943e-10	0.281516	0.072	0.004	5.62315e-05	ENSMUST00000109315	Nln	ENSMUSG00000021710	protein_coding	gap	chr13-104061853-104069194	chr13-104062068-104062963	0
chr4-55733105-55733614	2.79253e-10	0.301053	0.124	0.026	5.64965e-05	ENSMUST00000123620	Gm12506	ENSMUSG00000085375	lincRNA	exon	chr4-55636844-55636901	chr4-55733105-55733614	96203
chr18-5739918-5740859	2.81771e-10	0.262696	0.096	0.013	5.7006e-05	ENSMUST00000177070	Zeb1	ENSMUSG00000024238	protein_coding	gap	chr18-5705233-5745649	chr18-5739918-5740859	0
chr6-91729602-91730191	2.85289e-10	0.307116	0.152	0.041	5.77177e-05	ENSMUST00000032185	Slc6a6	ENSMUSG00000030096	protein_coding	gap	chr6-91726247-91735090	chr6-91729602-91730191	0
chr6-31300314-31300693	2.86684e-10	0.246798	0.062	0.001	5.79999e-05	ENSMUST00000155345	2210408F21Rik	ENSMUSG00000087380	processed_transcript	gap	chr6-31285121-31328288	chr6-31300314-31300693	0
chr11-101551328-101553245	2.88446e-10	0.28443	0.545	0.302	5.83563e-05	ENSMUST00000190862	Brca1	ENSMUSG00000017146	protein_coding	utr	chr11-101551526-101551582	chr11-101551328-101553245	0
chr10-7323124-7323601	2.91091e-10	0.311526	0.137	0.026	5.88916e-05	ENSMUST00000015346	Cnksr3	ENSMUSG00000015202	protein_coding	exon	chr10-7211632-7212237	chr10-7323124-7323601	110886
chr4-136246209-136246914	2.91163e-10	0.250258	0.057	0.003	5.89061e-05	ENSMUST00000136812	Tcea3	ENSMUSG00000001604	protein_coding	exon	chr4-136247729-136247805	chr4-136246209-136246914	814
chr9-75910078-75910615	2.94403e-10	0.320963	0.124	0.023	5.95615e-05	ENSMUST00000012281	Bmp5	ENSMUSG00000032179	protein_coding	utr	chr9-75898583-75900310	chr9-75910078-75910615	9767
chr5-92961513-92962232	3.04836e-10	0.294904	0.088	0.01	6.16724e-05	ENSMUST00000168878	Shroom3	ENSMUSG00000029381	protein_coding	cds	chr5-92962091-92962363	chr5-92961513-92962232	0
chr17-46879564-46880394	3.07763e-10	0.320986	0.279	0.135	6.22645e-05	ENSMUST00000086675	A330017A19Rik	ENSMUSG00000073388	protein_coding	utr	chr17-46889216-46889794	chr17-46879564-46880394	8821
chr5-147751554-147752069	3.14586e-10	0.318309	0.225	0.084	6.36448e-05	ENSMUST00000031653	Flt1	ENSMUSG00000029648	protein_coding	exon	chr5-147725671-147726011	chr5-147751554-147752069	25542
chr15-89480400-89481021	3.15639e-10	0.325671	0.302	0.134	6.38578e-05	ENSMUST00000165199	Arsa	ENSMUSG00000022620	protein_coding	exon	chr15-89477150-89477425	chr15-89480400-89481021	2974
chr4-45511033-45511256	3.24943e-10	0.230808	0.054	0.001	6.57401e-05	ENSMUST00000147448	Shb	ENSMUSG00000044813	protein_coding	gap	chr4-45489176-45532246	chr4-45511033-45511256	0
chr17-87102538-87102892	3.25536e-10	0.316122	0.189	0.068	6.58601e-05	ENSMUST00000041369	Socs5	ENSMUSG00000037104	protein_coding	exon	chr17-87107679-87108047	chr17-87102538-87102892	4786
chr5-66559341-66560208	3.34555e-10	0.313101	0.251	0.097	6.76848e-05	ENSMUST00000162994	Apbb2	ENSMUSG00000029207	protein_coding	gap	chr5-66492173-66618567	chr5-66559341-66560208	0
chr10-37336856-37338815	3.46383e-10	0.307076	0.173	0.062	7.00778e-05	ENSMUST00000181602	Gm26535	ENSMUSG00000097742	lincRNA	gap	chr10-37338345-37377145	chr10-37336856-37338815	0
chr5-118950797-118951417	3.52502e-10	0.29415	0.145	0.035	7.13158e-05	ENSMUST00000190550	1700081H04Rik	ENSMUSG00000100573	lincRNA	exon	chr5-119108234-119108715	chr5-118950797-118951417	156816
chr12-108284706-108285499	3.58729e-10	0.305141	0.147	0.039	7.25756e-05	ENSMUST00000136175	Ccdc85c	ENSMUSG00000084883	protein_coding	exon	chr12-108274338-108275417	chr12-108284706-108285499	9288
chr15-97870928-97871807	3.59529e-10	0.237436	0.065	0.006	7.27374e-05	ENSMUST00000023119	Vdr	ENSMUSG00000022479	protein_coding	gap	chr15-97869831-97876723	chr15-97870928-97871807	0
chr2-25145300-25145824	3.613e-10	0.304798	0.305	0.129	7.30958e-05	ENSMUST00000149619	Gm13387	ENSMUSG00000087028	lincRNA	exon	chr2-25144979-25145323	chr2-25145300-25145824	0
chr6-120927622-120928086	3.64016e-10	0.301886	0.155	0.038	7.36452e-05	ENSMUST00000098457	Mical3	ENSMUSG00000051586	protein_coding	utr	chr6-120931707-120934667	chr6-120927622-120928086	3620
chr12-53032598-53034014	3.65138e-10	0.294483	0.103	0.013	7.38721e-05	ENSMUST00000095737	Akap6	ENSMUSG00000061603	protein_coding	gap	chr12-53025842-53069106	chr12-53032598-53034014	0
chr1-183043294-183043666	3.65864e-10	0.26315	0.067	0.003	7.40191e-05	ENSMUST00000195372	Disp1	ENSMUSG00000030768	protein_coding	utr	chr1-183086266-183086288	chr1-183043294-183043666	42599
chr4-123803207-123803928	3.66286e-10	0.267453	0.07	0.006	7.41045e-05	ENSMUST00000150286	Rhbdl2	ENSMUSG00000043333	protein_coding	gap	chr4-123798308-123809913	chr4-123803207-123803928	0
chr12-55598898-55600718	3.72302e-10	0.284006	0.09	0.013	7.53215e-05	ENSMUST00000051857	Insm2	ENSMUSG00000045440	protein_coding	cds	chr12-55599473-55600954	chr12-55598898-55600718	0
chr5-140764697-140765784	3.81419e-10	0.312271	0.22	0.086	7.71661e-05	ENSMUST00000000153	Gna12	ENSMUSG00000000149	protein_coding	gap	chr5-140762641-140785396	chr5-140764697-140765784	0
chr7-79285328-79285767	3.81965e-10	0.314914	0.251	0.09	7.72765e-05	ENSMUST00000135333	Abhd2	ENSMUSG00000039202	protein_coding	gap	chr7-79273340-79294507	chr7-79285328-79285767	0
chr12-5336840-5337705	4.0127e-10	0.252188	0.078	0.007	8.11822e-05	ENSMUST00000020958	Klhl29	ENSMUSG00000020627	protein_coding	gap	chr12-5291445-5375101	chr12-5336840-5337705	0
chr1-183072119-183072972	4.02103e-10	0.309422	0.15	0.046	8.13506e-05	ENSMUST00000195372	Disp1	ENSMUSG00000030768	protein_coding	utr	chr1-183086266-183086288	chr1-183072119-183072972	13293
chr6-84048747-84049153	4.05136e-10	0.269327	0.098	0.016	8.19642e-05	ENSMUST00000168387	Dysf	ENSMUSG00000033788	protein_coding	gap	chr6-84039598-84058418	chr6-84048747-84049153	0
chr2-4428374-4428860	4.09229e-10	0.269102	0.088	0.015	8.27924e-05	ENSMUST00000177457	Frmd4a	ENSMUSG00000026657	protein_coding	gap	chr2-4018583-4431198	chr2-4428374-4428860	0
chr13-99410652-99411145	4.19729e-10	0.26862	0.072	0.004	8.49167e-05	ENSMUST00000180491	6430562O15Rik	ENSMUSG00000097828	lincRNA	gap	chr13-99401359-99411841	chr13-99410652-99411145	0
chr7-123046365-123047152	4.22556e-10	0.310267	0.098	0.01	8.54886e-05	ENSMUST00000071590	Rbbp6	ENSMUSG00000030779	protein_coding	utr	chr7-123002145-123002557	chr7-123046365-123047152	43807
chr7-110259718-110260325	4.31038e-10	0.318629	0.165	0.054	8.72046e-05	ENSMUST00000033325	Swap70	ENSMUSG00000031015	protein_coding	gap	chr7-110255909-110263879	chr7-110259718-110260325	0
chr2-9481726-9482460	4.54458e-10	0.241989	0.054	0.001	9.19428e-05	ENSMUST00000144870	Gm13219	ENSMUSG00000079604	lincRNA	exon	chr2-9444982-9447676	chr2-9481726-9482460	34049
chr1-187653278-187653693	4.62831e-10	0.296235	0.098	0.015	9.36366e-05	ENSMUST00000152927	Esrrg	ENSMUSG00000026610	protein_coding	gap	chr1-187609785-187793324	chr1-187653278-187653693	0
chr17-35802734-35803339	4.701e-10	0.310319	0.152	0.045	9.51073e-05	ENSMUST00000003635	Ier3	ENSMUSG00000003541	protein_coding	exon	chr17-35821684-35821928	chr17-35802734-35803339	18344
chr15-97820907-97821843	4.7415e-10	0.301672	0.256	0.112	9.59266e-05	ENSMUST00000156045	Hdac7	ENSMUSG00000022475	protein_coding	gap	chr15-97811629-97831358	chr15-97820907-97821843	0
chr4-89478645-89479202	4.76354e-10	0.267528	0.096	0.015	9.63726e-05	ENSMUST00000139272	Gm12610	ENSMUSG00000086035	processed_transcript	exon	chr4-89463255-89463487	chr4-89478645-89479202	15157
chr16-34371936-34372850	4.83728e-10	0.304705	0.349	0.165	9.78646e-05	ENSMUST00000151491	Kalrn	ENSMUSG00000061751	protein_coding	gap	chr16-34361010-34385284	chr16-34371936-34372850	0
chr13-107676044-107677309	4.84254e-10	0.310771	0.3	0.126	9.79708e-05	ENSMUST00000188490	1700006H21Rik	ENSMUSG00000102000	lincRNA	exon	chr13-107687397-107687584	chr13-107676044-107677309	10087
chr17-35783876-35784236	4.84468e-10	0.323952	0.191	0.065	9.80142e-05	ENSMUST00000172874	4833427F10Rik	ENSMUSG00000092171	lincRNA	exon	chr17-35780023-35780687	chr17-35783876-35784236	3188
chr11-118430029-118430736	4.86823e-10	0.289618	0.088	0.01	9.84906e-05	ENSMUST00000124861	C1qtnf1	ENSMUSG00000017446	protein_coding	gap	chr11-118428569-118433244	chr11-118430029-118430736	0
chr16-30186158-30188580	4.87589e-10	0.276199	0.494	0.27	9.86456e-05	ENSMUST00000187479	1700025H01Rik	ENSMUSG00000101888	lincRNA	exon	chr16-30195071-30195249	chr16-30186158-30188580	6490
chr7-100991607-100992467	4.8995e-10	0.308415	0.14	0.041	9.91233e-05	ENSMUST00000037540	P2ry2	ENSMUSG00000032860	protein_coding	utr	chr7-100996572-100997974	chr7-100991607-100992467	4104
chr11-8247433-8248074	4.91517e-10	0.317846	0.109	0.016	9.94403e-05	ENSMUST00000020695	Tns3	ENSMUSG00000020422	protein_coding	utr	chr11-8431652-8434493	chr11-8247433-8248074	183577
chr11-69670768-69672729	4.93829e-10	0.266582	0.571	0.332	9.9908e-05	ENSMUST00000163666	Eif4a1	ENSMUSG00000059796	protein_coding	cds	chr11-69672279-69672301	chr11-69670768-69672729	0
chr1-156667106-156667887	4.95137e-10	0.271084	0.078	0.003	0.000100173	ENSMUST00000190607	Tor3a	ENSMUSG00000060519	protein_coding	gap	chr1-156666778-156673529	chr1-156667106-156667887	0
chr1-153191327-153191711	5.05497e-10	0.255961	0.072	0.006	0.000102269	ENSMUST00000027753	Lamc2	ENSMUSG00000026479	protein_coding	exon	chr1-153186254-153186447	chr1-153191327-153191711	4879
chr4-9067827-9068179	5.16008e-10	0.272758	0.078	0.007	0.000104395	ENSMUST00000181165	Gm26548	ENSMUSG00000097094	lincRNA	exon	chr4-9267323-9268411	chr4-9067827-9068179	199143
chr9-96394818-96395593	5.23354e-10	0.312426	0.178	0.061	0.000105881	ENSMUST00000034983	Atp1b3	ENSMUSG00000032412	protein_coding	exon	chr9-96364046-96364442	chr9-96394818-96395593	30375
chr4-134256451-134256869	5.24529e-10	0.302303	0.173	0.061	0.000106119	ENSMUST00000060050	Grrp1	ENSMUSG00000050105	protein_coding	exon	chr4-134254030-134254106	chr4-134256451-134256869	2344
chr11-68457995-68458881	5.28777e-10	0.303521	0.114	0.022	0.000106978	ENSMUST00000154220	Pik3r5	ENSMUSG00000020901	protein_coding	gap	chr11-68432263-68473794	chr11-68457995-68458881	0
chr3-152468561-152469876	5.30225e-10	0.266786	0.083	0.007	0.000107271	ENSMUST00000045262	Ak5	ENSMUSG00000039058	protein_coding	gap	chr3-152464017-152472756	chr3-152468561-152469876	0
chr11-6694554-6695831	5.33142e-10	0.304625	0.199	0.07	0.000107862	ENSMUST00000045374	Ramp3	ENSMUSG00000041046	protein_coding	utr	chr11-6676739-6677475	chr11-6694554-6695831	17078
chr15-6331421-6331645	5.45052e-10	0.252164	0.065	0.003	0.000110271	ENSMUST00000162140	Dab2	ENSMUSG00000022150	protein_coding	gap	chr15-6330501-6336244	chr15-6331421-6331645	0
chr15-41611826-41612673	5.65507e-10	0.302557	0.196	0.086	0.000114409	ENSMUST00000179393	Oxr1	ENSMUSG00000022307	protein_coding	gap	chr15-41535728-41653464	chr15-41611826-41612673	0
chr6-116644030-116644639	5.66665e-10	0.331292	0.251	0.096	0.000114644	ENSMUST00000035842	Rassf4	ENSMUSG00000042129	protein_coding	gap	chr6-116641787-116645095	chr6-116644030-116644639	0
chr11-79729363-79730204	5.70536e-10	0.318689	0.227	0.096	0.000115427	ENSMUST00000137738	Gm11205	ENSMUSG00000084969	lincRNA	exon	chr11-79705151-79705420	chr11-79729363-79730204	23942
chr6-121017130-121018022	5.77055e-10	0.318452	0.245	0.1	0.000116746	ENSMUST00000077159	Mical3	ENSMUSG00000003178	protein_coding	gap	chr6-121009182-121021182	chr6-121017130-121018022	0
chr3-96069502-96070074	5.77219e-10	0.280028	0.155	0.049	0.000116779	ENSMUST00000015891	Vps45	ENSMUSG00000015747	protein_coding	exon	chr3-96057682-96058466	chr3-96069502-96070074	11035
chr4-126095860-126097092	5.78105e-10	0.31595	0.279	0.138	0.000116958	ENSMUST00000179323	Lsm10	ENSMUSG00000050188	protein_coding	utr	chr4-126096653-126096707	chr4-126095860-126097092	0
chr10-96187483-96188983	6.27804e-10	0.309421	0.204	0.06	0.000127013	ENSMUST00000074615	Gm5426	ENSMUSG00000096486	protein_coding	cds	chr10-96136603-96136914	chr10-96187483-96188983	50568
chr19-23697796-23698699	6.29047e-10	0.312209	0.163	0.039	0.000127264	ENSMUST00000099560	Ptar1	ENSMUSG00000074925	protein_coding	gap	chr19-23694491-23703077	chr19-23697796-23698699	0
chr5-150614283-150614547	6.29069e-10	0.23476	0.065	0.003	0.000127269	ENSMUST00000164332	N4bp2l2	ENSMUSG00000029655	protein_coding	gap	chr5-150608441-150643168	chr5-150614283-150614547	0
chr18-4032219-4032805	6.29678e-10	0.295924	0.101	0.012	0.000127392	ENSMUST00000025076	Lyzl1	ENSMUSG00000024233	protein_coding	exon	chr18-4165832-4165947	chr18-4032219-4032805	133026
chr4-137488896-137489315	6.3232e-10	0.307933	0.124	0.028	0.000127927	ENSMUST00000171332	Hspg2	ENSMUSG00000028763	protein_coding	gap	chr4-137468925-137501058	chr4-137488896-137489315	0
chr10-91299915-91300426	6.36479e-10	0.266312	0.083	0.007	0.000128768	ENSMUST00000020123	Tmpo	ENSMUSG00000019961	protein_coding	exon	chr10-91171038-91171582	chr10-91299915-91300426	128332
chr11-33882547-33883218	6.59128e-10	0.298581	0.083	0.01	0.00013335	ENSMUST00000154760	Kcnip1	ENSMUSG00000053519	protein_coding	gap	chr11-33645628-33992748	chr11-33882547-33883218	0
chr2-13500248-13500625	6.6511e-10	0.260778	0.067	0.004	0.00013456	ENSMUST00000124488	Trdmt1	ENSMUSG00000026723	protein_coding	utr	chr2-13509014-13511517	chr2-13500248-13500625	8388
chr5-142949525-142949892	6.66344e-10	0.245652	0.067	0.006	0.00013481	ENSMUST00000031565	Fscn1	ENSMUSG00000029581	protein_coding	exon	chr5-142960343-142961280	chr5-142949525-142949892	10450
chr17-31905256-31906283	6.85932e-10	0.301402	0.346	0.167	0.000138773	ENSMUST00000002145	Hsf2bp	ENSMUSG00000002076	protein_coding	utr	chr17-31944769-31946602	chr17-31905256-31906283	38485
chr4-136284396-136284651	7.03075e-10	0.293354	0.158	0.044	0.000142241	ENSMUST00000144217	Zfp46	ENSMUSG00000051351	protein_coding	exon	chr4-136284683-136285095	chr4-136284396-136284651	31
chr2-85145479-85145937	7.07231e-10	0.279941	0.088	0.012	0.000143082	ENSMUST00000057019	Aplnr	ENSMUSG00000044338	protein_coding	utr	chr2-85137767-85139923	chr2-85145479-85145937	5555
chr15-74931526-74932211	7.08188e-10	0.31645	0.145	0.036	0.000143276	ENSMUST00000169343	Ly6e	ENSMUSG00000022587	protein_coding	exon	chr15-74955051-74955335	chr15-74931526-74932211	22839
chr3-52383265-52383692	7.10133e-10	0.307038	0.158	0.038	0.000143669	ENSMUST00000053764	Foxo1	ENSMUSG00000044167	protein_coding	utr	chr3-52346996-52353221	chr3-52383265-52383692	30043
chr3-58161935-58162670	7.2617e-10	0.307397	0.176	0.044	0.000146914	ENSMUST00000188418	1700007F19Rik	ENSMUSG00000100666	lincRNA	gap	chr3-58162467-58163506	chr3-58161935-58162670	0
chr12-58538086-58538676	7.28799e-10	0.256187	0.062	0.003	0.000147446	ENSMUST00000062254	Clec14a	ENSMUSG00000045930	protein_coding	exon	chr12-58264720-58269258	chr12-58538086-58538676	268827
chr4-105423673-105424127	7.39656e-10	0.290035	0.096	0.012	0.000149642	ENSMUST00000064139	Ppap2b	ENSMUSG00000028517	protein_coding	utr	chr4-105231023-105232764	chr4-105423673-105424127	190908
chr11-101360397-101361120	7.45587e-10	0.314551	0.119	0.026	0.000150842	ENSMUST00000019469	G6pc	ENSMUSG00000078650	protein_coding	exon	chr11-101367561-101368026	chr11-101360397-101361120	6440
chr14-18462270-18462719	7.46787e-10	0.268735	0.067	0.003	0.000151085	ENSMUST00000176555	Ube2e2	ENSMUSG00000058317	protein_coding	utr	chr14-18573575-18574391	chr14-18462270-18462719	110855
chr3-152556513-152556733	7.52636e-10	0.257689	0.075	0.007	0.000152268	ENSMUST00000045262	Ak5	ENSMUSG00000039058	protein_coding	gap	chr3-152533446-152615857	chr3-152556513-152556733	0
chr9-66276754-66277383	7.54429e-10	0.306488	0.209	0.073	0.000152631	ENSMUST00000034944	Dapk2	ENSMUSG00000032380	protein_coding	utr	chr9-66271708-66272242	chr9-66276754-66277383	4511
chr6-12393715-12394314	7.55292e-10	0.297622	0.106	0.016	0.000152805	ENSMUST00000172356	Thsd7a	ENSMUSG00000032625	protein_coding	gap	chr6-12381416-12396555	chr6-12393715-12394314	0
chr3-122473762-122474458	7.70302e-10	0.307858	0.191	0.071	0.000155842	ENSMUST00000029766	Bcar3	ENSMUSG00000028121	protein_coding	gap	chr3-122455093-122504926	chr3-122473762-122474458	0
chr15-80024144-80026250	7.73041e-10	0.315228	0.23	0.084	0.000156396	ENSMUST00000000500	Pdgfb	ENSMUSG00000000489	protein_coding	exon	chr15-80013936-80014808	chr15-80024144-80026250	9335
chr9-95168430-95168805	7.74414e-10	0.286695	0.093	0.013	0.000156674	ENSMUST00000033463	Slc9a9	ENSMUSG00000031129	protein_coding	gap	chr9-95137981-95227187	chr9-95168430-95168805	0
chr2-92617734-92618275	7.86066e-10	0.277131	0.078	0.006	0.000159031	ENSMUST00000065797	Chst1	ENSMUSG00000027221	protein_coding	utr	chr2-92614421-92615250	chr2-92617734-92618275	2483
chr5-144898411-144898869	7.95666e-10	0.257632	0.078	0.006	0.000160974	ENSMUST00000110677	Smurf1	ENSMUSG00000038780	protein_coding	gap	chr5-144898059-144899146	chr5-144898411-144898869	0
chr7-84196929-84197719	7.95721e-10	0.260092	0.078	0.009	0.000160985	ENSMUST00000180424	Gm26708	ENSMUSG00000097016	lincRNA	exon	chr7-84194020-84194973	chr7-84196929-84197719	1955
chr1-55048974-55049452	8.10011e-10	0.275289	0.083	0.01	0.000163876	ENSMUST00000027125	Coq10b	ENSMUSG00000025981	protein_coding	exon	chr1-55052770-55052990	chr1-55048974-55049452	3317
chr3-154754557-154754762	8.11216e-10	0.217015	0.052	0.001	0.000164119	ENSMUST00000098496	BC007180	ENSMUSG00000078161	protein_coding	gap	chr3-154748727-154756957	chr3-154754557-154754762	0
chr5-24265788-24266974	8.26937e-10	0.316909	0.235	0.084	0.0001673	ENSMUST00000115098	Kcnh2	ENSMUSG00000038319	protein_coding	utr	chr5-24319589-24319999	chr5-24265788-24266974	52614
chr8-92008897-92009156	8.50402e-10	0.255889	0.065	0.004	0.000172047	ENSMUST00000190257	Gm28516	ENSMUSG00000101613	lincRNA	exon	chr8-92024442-92024602	chr8-92008897-92009156	15285
chr1-62747805-62748030	8.69725e-10	0.274833	0.09	0.013	0.000175957	ENSMUST00000114157	Nrp2	ENSMUSG00000025969	protein_coding	gap	chr1-62747328-62749132	chr1-62747805-62748030	0
chr10-76902525-76903521	8.8347e-10	0.309231	0.202	0.068	0.000178737	ENSMUST00000171437	Pcbp3	ENSMUSG00000001120	protein_coding	gap	chr10-76892657-76905774	chr10-76902525-76903521	0
chr1-86470151-86473393	8.91034e-10	0.29757	0.429	0.212	0.000180268	ENSMUST00000046004	1700019O17Rik	ENSMUSG00000036574	protein_coding	utr	chr1-86427964-86428052	chr1-86470151-86473393	42098
chr11-94957755-94958853	8.98002e-10	0.321056	0.261	0.091	0.000181678	ENSMUST00000103162	Sgca	ENSMUSG00000001508	protein_coding	utr	chr11-94962791-94963080	chr11-94957755-94958853	3937
chr4-133729127-133730445	9.00467e-10	0.290759	0.359	0.181	0.000182176	ENSMUST00000145664	Arid1a	ENSMUSG00000007880	protein_coding	gap	chr4-133723052-133752468	chr4-133729127-133730445	0
chr11-110544481-110544785	9.04115e-10	0.264076	0.07	0.004	0.000182914	ENSMUST00000144689	Gm11682	ENSMUSG00000085985	lincRNA	gap	chr11-110544690-110545554	chr11-110544481-110544785	0
chr7-101050491-101052295	9.21324e-10	0.313102	0.202	0.077	0.000186396	ENSMUST00000037540	P2ry2	ENSMUSG00000032860	protein_coding	exon	chr7-101011712-101011991	chr7-101050491-101052295	38499
chr18-76164230-76164429	9.43348e-10	0.263793	0.07	0.006	0.000190852	ENSMUST00000058997	Zbtb7c	ENSMUSG00000044646	protein_coding	utr	chr18-76146333-76148561	chr18-76164230-76164429	15668
chr19-40305514-40305771	9.71875e-10	0.24896	0.067	0.006	0.000196623	ENSMUST00000165469	Sorbs1	ENSMUSG00000025006	protein_coding	gap	chr19-40299522-40311668	chr19-40305514-40305771	0
chr8-120205925-120206223	9.75859e-10	0.27278	0.09	0.015	0.000197429	ENSMUST00000127664	Gm20388	ENSMUSG00000092329	protein_coding	gap	chr8-119910940-124295357	chr8-120205925-120206223	0
chr2-4317849-4318543	9.76146e-10	0.274846	0.109	0.02	0.000197487	ENSMUST00000177457	Frmd4a	ENSMUSG00000026657	protein_coding	gap	chr2-4018583-4431198	chr2-4317849-4318543	0
chr15-62049312-62049719	9.90339e-10	0.255485	0.072	0.01	0.000200358	ENSMUST00000183297	Pvt1	ENSMUSG00000097039	lincRNA	gap	chr15-62039448-62107147	chr15-62049312-62049719	0
chr18-57744684-57745791	1.03193e-09	0.269168	0.083	0.01	0.000208773	ENSMUST00000135806	1700011I03Rik	ENSMUSG00000058925	protein_coding	utr	chr18-57730787-57731065	chr18-57744684-57745791	13618
chr16-10286468-10286940	1.06797e-09	0.246063	0.062	0.001	0.000216064	ENSMUST00000078357	Emp2	ENSMUSG00000022505	protein_coding	gap	chr16-10285602-10288054	chr16-10286468-10286940	0
chr11-117959634-117960389	1.12607e-09	0.294499	0.173	0.064	0.000227819	ENSMUST00000054002	Socs3	ENSMUSG00000053113	protein_coding	utr	chr11-117966079-117967552	chr11-117959634-117960389	5689
chr10-94572760-94572984	1.12854e-09	0.310913	0.137	0.033	0.000228319	ENSMUST00000148910	Tmcc3	ENSMUSG00000020023	protein_coding	gap	chr10-94551027-94578422	chr10-94572760-94572984	0
chr3-123652838-123653741	1.14227e-09	0.305637	0.124	0.025	0.000231096	ENSMUST00000172537	Ndst3	ENSMUSG00000027977	protein_coding	gap	chr3-123607032-123671340	chr3-123652838-123653741	0
chr13-5844792-5845990	1.14376e-09	0.294158	0.271	0.116	0.000231398	ENSMUST00000186843	1700016G22Rik	ENSMUSG00000100625	lincRNA	exon	chr13-5855508-5855951	chr13-5844792-5845990	9517
chr11-102425320-102425906	1.14431e-09	0.307735	0.248	0.103	0.00023151	ENSMUST00000049460	Grn	ENSMUSG00000034708	protein_coding	exon	chr11-102430315-102430540	chr11-102425320-102425906	4408
chr8-79208454-79210367	1.15661e-09	0.312881	0.202	0.061	0.000233997	ENSMUST00000034109	1700011L22Rik	ENSMUSG00000031682	protein_coding	utr	chr8-79210430-79210649	chr8-79208454-79210367	62
chr12-112896917-112898255	1.17872e-09	0.293499	0.323	0.151	0.00023847	ENSMUST00000075827	Jag2	ENSMUSG00000002799	protein_coding	utr	chr12-112908590-112908888	chr12-112896917-112898255	10334
chr1-119209561-119210028	1.18851e-09	0.303317	0.147	0.038	0.00024045	ENSMUST00000189894	Gm29456	ENSMUSG00000099860	lincRNA	exon	chr1-119305346-119305675	chr1-119209561-119210028	95317
chr13-28718188-28719064	1.21387e-09	0.287566	0.129	0.033	0.000245582	ENSMUST00000148885	2610307P16Rik	ENSMUSG00000085936	processed_transcript	gap	chr13-28669995-28772618	chr13-28718188-28719064	0
chr10-83152088-83153021	1.22027e-09	0.287976	0.114	0.023	0.000246877	ENSMUST00000040110	Chst11	ENSMUSG00000034612	protein_coding	gap	chr10-83092155-83190944	chr10-83152088-83153021	0
chr12-112952452-112952781	1.22028e-09	0.286151	0.158	0.046	0.000246878	ENSMUST00000181436	Gm26583	ENSMUSG00000097476	lincRNA	exon	chr12-112950491-112950512	chr12-112952452-112952781	1939
chr14-11868635-11868952	1.22331e-09	0.314222	0.129	0.028	0.000247492	ENSMUST00000148113	Ptprg	ENSMUSG00000021745	protein_coding	gap	chr14-11721220-11952715	chr14-11868635-11868952	0
chr5-32132892-32133847	1.24541e-09	0.30064	0.253	0.106	0.000251962	ENSMUST00000031017	Fosl2	ENSMUSG00000029135	protein_coding	exon	chr5-32136472-32136805	chr5-32132892-32133847	2624
chr7-19815749-19816906	1.24844e-09	0.306156	0.354	0.165	0.000252575	ENSMUST00000146194	Bcl3	ENSMUSG00000053175	protein_coding	gap	chr7-19812514-19820046	chr7-19815749-19816906	0
chr13-28917655-28918195	1.25292e-09	0.252554	0.067	0.004	0.000253481	ENSMUST00000180992	Gm26735	ENSMUSG00000097461	lincRNA	exon	chr13-28943048-28943080	chr13-28917655-28918195	24852
chr6-108569395-108569918	1.25433e-09	0.273911	0.127	0.039	0.000253767	ENSMUST00000032192	Itpr1	ENSMUSG00000030102	protein_coding	utr	chr6-108549840-108551109	chr6-108569395-108569918	18285
chr4-125131119-125131831	1.26108e-09	0.27862	0.163	0.051	0.000255134	ENSMUST00000036188	Zc3h12a	ENSMUSG00000042677	protein_coding	exon	chr4-125127767-125127840	chr4-125131119-125131831	3278
chr12-76593552-76594586	1.26189e-09	0.298622	0.186	0.065	0.000255296	ENSMUST00000021458	Sptb	ENSMUSG00000021061	protein_coding	gap	chr12-76587591-76597725	chr12-76593552-76594586	0
chr15-79951962-79952649	1.27295e-09	0.31935	0.225	0.084	0.000257534	ENSMUST00000132821	Cbx7	ENSMUSG00000053411	protein_coding	gap	chr15-79930630-79970868	chr15-79951962-79952649	0
chr8-105874206-105874773	1.27423e-09	0.271516	0.101	0.016	0.000257793	ENSMUST00000008594	Nutf2	ENSMUSG00000008450	protein_coding	gap	chr8-105860706-105875533	chr8-105874206-105874773	0
chr15-54808974-54810047	1.27431e-09	0.254907	0.083	0.007	0.000257809	ENSMUST00000171545	Enpp2	ENSMUSG00000022425	protein_coding	utr	chr15-54838898-54839365	chr15-54808974-54810047	28850
chr4-142070802-142071852	1.27612e-09	0.285041	0.158	0.042	0.000258176	ENSMUST00000036572	Tmem51	ENSMUSG00000040616	protein_coding	gap	chr4-142037934-142084061	chr4-142070802-142071852	0
chr4-62596228-62596561	1.2769e-09	0.276748	0.088	0.01	0.000258333	ENSMUST00000098031	Rgs3	ENSMUSG00000059810	protein_coding	gap	chr4-62583714-62602920	chr4-62596228-62596561	0
chr4-142065263-142066215	1.28674e-09	0.299786	0.152	0.041	0.000260324	ENSMUST00000036572	Tmem51	ENSMUSG00000040616	protein_coding	gap	chr4-142037934-142084061	chr4-142065263-142066215	0
chr3-50437849-50438457	1.29038e-09	0.266256	0.132	0.036	0.00026106	ENSMUST00000194462	Slc7a11	ENSMUSG00000027737	protein_coding	gap	chr3-50435465-50438788	chr3-50437849-50438457	0
chr3-68508448-68509097	1.29336e-09	0.324203	0.191	0.06	0.000261664	ENSMUST00000192555	Schip1	ENSMUSG00000027777	protein_coding	gap	chr3-68495258-68596149	chr3-68508448-68509097	0
chr2-90611923-90612751	1.33271e-09	0.287865	0.114	0.023	0.000269625	ENSMUST00000168621	Ptprj	ENSMUSG00000025314	protein_coding	exon	chr2-90580156-90580647	chr2-90611923-90612751	31275
chr2-158135948-158136640	1.34316e-09	0.312532	0.269	0.118	0.00027174	ENSMUST00000174718	Tgm2	ENSMUSG00000037820	protein_coding	gap	chr2-158129431-158138706	chr2-158135948-158136640	0
chr9-122022407-122023246	1.35061e-09	0.300695	0.38	0.184	0.000273246	ENSMUST00000084743	Pomgnt2	ENSMUSG00000066235	protein_coding	exon	chr9-121995876-121996026	chr9-122022407-122023246	26380
chr18-38205185-38205771	1.3974e-09	0.269157	0.09	0.016	0.000282712	ENSMUST00000193828	Pcdh1	ENSMUSG00000051375	protein_coding	gap	chr18-38203607-38210283	chr18-38205185-38205771	0
chr6-55294487-55295181	1.40091e-09	0.290354	0.204	0.081	0.000283422	ENSMUST00000053094	Fam188b	ENSMUSG00000038022	protein_coding	gap	chr6-55284814-55297687	chr6-55294487-55295181	0
chr7-71960395-71961217	1.4127e-09	0.297364	0.186	0.07	0.000285807	ENSMUST00000079323	Mctp2	ENSMUSG00000032776	protein_coding	utr	chr7-72077830-72080788	chr7-71960395-71961217	116612
chr1-90486251-90486772	1.41701e-09	0.286554	0.124	0.026	0.00028668	ENSMUST00000187630	Gm28722	ENSMUSG00000101997	lincRNA	exon	chr1-90454337-90454501	chr1-90486251-90486772	31749
chr14-79034415-79034855	1.41805e-09	0.322166	0.171	0.065	0.000286889	ENSMUST00000040990	Vwa8	ENSMUSG00000058997	protein_coding	gap	chr14-79026078-79038124	chr14-79034415-79034855	0
chr8-121668481-121669567	1.42794e-09	0.287229	0.336	0.154	0.00028889	ENSMUST00000127664	Gm20388	ENSMUSG00000092329	protein_coding	gap	chr8-119910940-124295357	chr8-121668481-121669567	0
chr11-101881319-101882056	1.44509e-09	0.295111	0.189	0.058	0.000292361	ENSMUST00000057054	Meox1	ENSMUSG00000001493	protein_coding	gap	chr11-101879437-101893542	chr11-101881319-101882056	0
chr9-61031579-61032477	1.4565e-09	0.298133	0.207	0.074	0.000294669	ENSMUST00000050183	Uaca	ENSMUSG00000034485	protein_coding	utr	chr9-60880246-60880370	chr9-61031579-61032477	151208
chr7-132339372-132339886	1.45895e-09	0.324787	0.212	0.073	0.000295165	ENSMUST00000124096	Fgfr2	ENSMUSG00000030849	protein_coding	gap	chr7-130172940-133081756	chr7-132339372-132339886	0
chr16-95340833-95341830	1.45951e-09	0.31153	0.217	0.071	0.000295277	ENSMUST00000113846	Erg	ENSMUSG00000040732	protein_coding	utr	chr16-95359169-95360805	chr16-95340833-95341830	17338
chr2-30753110-30753581	1.46072e-09	0.33833	0.158	0.033	0.000295523	ENSMUST00000134755	Gm14488	ENSMUSG00000075416	processed_transcript	exon	chr2-30719973-30720057	chr2-30753110-30753581	33052
chr7-71311380-71311790	1.46521e-09	0.313718	0.155	0.045	0.000296431	ENSMUST00000094315	Gm10295	ENSMUSG00000070511	protein_coding	utr	chr7-71348961-71350485	chr7-71311380-71311790	37170
chr14-98167049-98170216	1.48183e-09	0.306902	0.233	0.09	0.000299794	ENSMUST00000071533	Dach1	ENSMUSG00000055639	protein_coding	cds	chr14-98168483-98169309	chr14-98167049-98170216	0
chr7-68606291-68606632	1.50249e-09	0.265117	0.103	0.019	0.000303972	ENSMUST00000048068	Arrdc4	ENSMUSG00000042659	protein_coding	utr	chr7-68737045-68739476	chr7-68606291-68606632	130412
chr12-86626647-86626939	1.50741e-09	0.260459	0.088	0.013	0.000304969	ENSMUST00000021681	Vash1	ENSMUSG00000021256	protein_coding	exon	chr12-86678700-86680326	chr12-86626647-86626939	51760
chr16-90901166-90901670	1.52874e-09	0.283361	0.127	0.036	0.000309285	ENSMUST00000152223	Eva1c	ENSMUSG00000039903	protein_coding	gap	chr16-90897454-90904103	chr16-90901166-90901670	0
chr9-56552197-56553180	1.55974e-09	0.290563	0.258	0.103	0.000315557	ENSMUST00000181927	Gm26868	ENSMUSG00000097870	lincRNA	exon	chr9-56606693-56606746	chr9-56552197-56553180	53512
chr19-12010964-12012602	1.56168e-09	0.30571	0.411	0.216	0.000315947	ENSMUST00000025590	Osbp	ENSMUSG00000024687	protein_coding	utr	chr19-11992043-11994105	chr19-12010964-12012602	16858
chr5-67662311-67662510	1.57005e-09	0.244476	0.054	0.001	0.000317642	ENSMUST00000135930	Atp8a1	ENSMUSG00000037685	protein_coding	gap	chr5-67660169-67667320	chr5-67662311-67662510	0
chr15-88839267-88839523	1.57388e-09	0.299838	0.132	0.029	0.000318416	ENSMUST00000024042	Creld2	ENSMUSG00000023272	protein_coding	utr	chr15-88826437-88826681	chr15-88839267-88839523	12585
chr5-104149310-104149657	1.57474e-09	0.286476	0.111	0.022	0.000318591	ENSMUST00000112771	Dspp	ENSMUSG00000053268	protein_coding	exon	chr5-104170712-104170768	chr5-104149310-104149657	21054
chr10-62299889-62300784	1.5859e-09	0.302061	0.189	0.058	0.000320847	ENSMUST00000152761	Hk1	ENSMUSG00000037012	protein_coding	gap	chr10-62299270-62304719	chr10-62299889-62300784	0
chr5-33009568-33010217	1.58784e-09	0.259927	0.075	0.007	0.000321241	ENSMUST00000019109	Ywhah	ENSMUSG00000018965	protein_coding	exon	chr5-33018816-33019154	chr5-33009568-33010217	8598
chr16-30552636-30553369	1.6147e-09	0.307685	0.328	0.155	0.000326675	ENSMUST00000125559	Tmem44	ENSMUSG00000022537	protein_coding	exon	chr16-30549393-30550842	chr16-30552636-30553369	1793
chr19-24251824-24252166	1.62883e-09	0.262237	0.067	0.006	0.000329534	ENSMUST00000081333	Fxn	ENSMUSG00000059363	protein_coding	utr	chr19-24261453-24261902	chr19-24251824-24252166	9286
chr19-57272711-57273665	1.64799e-09	0.300688	0.163	0.051	0.000333409	ENSMUST00000156316	Ablim1	ENSMUSG00000025085	protein_coding	gap	chr19-57173460-57314692	chr19-57272711-57273665	0
chr3-101778752-101779796	1.65091e-09	0.297025	0.212	0.074	0.000334001	ENSMUST00000061831	Mab21l3	ENSMUSG00000044313	protein_coding	utr	chr3-101813076-101815018	chr3-101778752-101779796	33279
chr2-79555444-79555851	1.65856e-09	0.249024	0.067	0.004	0.000335549	ENSMUST00000111785	Ssfa2	ENSMUSG00000027007	protein_coding	exon	chr2-79635352-79635744	chr2-79555444-79555851	79500
chr4-53315198-53317281	1.66633e-09	0.309405	0.22	0.071	0.00033712	ENSMUST00000123127	AI427809	ENSMUSG00000086712	lincRNA	exon	chr4-53270079-53270232	chr4-53315198-53317281	44965
chr18-64637191-64638091	1.67551e-09	0.301689	0.103	0.026	0.000338978	ENSMUST00000025482	Atp8b1	ENSMUSG00000039529	protein_coding	gap	chr18-64605401-64660699	chr18-64637191-64638091	0
chr13-98027194-98028351	1.6843e-09	0.297144	0.178	0.042	0.000340756	ENSMUST00000109426	Arhgef28	ENSMUSG00000021662	protein_coding	gap	chr13-97996934-98029376	chr13-98027194-98028351	0
chr5-64437669-64439101	1.69044e-09	0.278411	0.078	0.012	0.000341998	ENSMUST00000185829	1700027F09Rik	ENSMUSG00000100911	lincRNA	exon	chr5-64454806-64455285	chr5-64437669-64439101	15704
chr3-105824846-105826299	1.71761e-09	0.283683	0.326	0.163	0.000347494	ENSMUST00000090678	Rap1a	ENSMUSG00000068798	protein_coding	exon	chr3-105801239-105801330	chr3-105824846-105826299	23515
chr5-27671546-27671757	1.72594e-09	0.243741	0.059	0.003	0.000349181	ENSMUST00000134175	Dpp6	ENSMUSG00000061576	protein_coding	gap	chr5-27666529-27696849	chr5-27671546-27671757	0
chr5-134491367-134492325	1.73604e-09	0.309848	0.269	0.119	0.000351223	ENSMUST00000100647	Clip2	ENSMUSG00000063146	protein_coding	cds	chr5-134492219-134492404	chr5-134491367-134492325	0
chr11-117307811-117308412	1.7446e-09	0.304071	0.152	0.041	0.000352956	ENSMUST00000153668	Sept9	ENSMUSG00000059248	protein_coding	utr	chr11-117308154-117308271	chr11-117307811-117308412	0
chr1-61373484-61374548	1.76516e-09	0.290069	0.351	0.155	0.000357115	ENSMUST00000141000	9530026F06Rik	ENSMUSG00000085447	lincRNA	exon	chr1-61378432-61378556	chr1-61373484-61374548	3883
chr14-69088438-69089873	1.77185e-09	0.286316	0.276	0.125	0.000358469	ENSMUST00000014957	Stc1	ENSMUSG00000014813	protein_coding	utr	chr14-69038504-69041401	chr14-69088438-69089873	47036
chr14-118690003-118691241	1.78625e-09	0.298321	0.132	0.032	0.000361382	ENSMUST00000166646	Abcc4	ENSMUSG00000032849	protein_coding	gap	chr14-118669108-118706035	chr14-118690003-118691241	0
chr2-59425687-59426186	1.79464e-09	0.279267	0.109	0.017	0.000363079	ENSMUST00000155111	5330411J11Rik	ENSMUSG00000087455	processed_transcript	exon	chr2-59387294-59387471	chr2-59425687-59426186	38215
chr14-7958486-7958943	1.8056e-09	0.280526	0.101	0.016	0.000365297	ENSMUST00000026315	Dnase1l3	ENSMUSG00000025279	protein_coding	utr	chr14-7964533-7967758	chr14-7958486-7958943	5589
chr1-119509586-119509791	1.80773e-09	0.270821	0.106	0.022	0.000365728	ENSMUST00000004565	Ralb	ENSMUSG00000004451	protein_coding	exon	chr1-119504577-119504794	chr1-119509586-119509791	4791
chr5-119669832-119671146	1.8084e-09	0.298867	0.372	0.18	0.000365864	ENSMUST00000121021	Tbx3	ENSMUSG00000018604	protein_coding	utr	chr5-119670862-119671057	chr5-119669832-119671146	0
chr6-112387954-112388311	1.81291e-09	0.285288	0.106	0.017	0.000366775	ENSMUST00000060847	Ssu2	ENSMUSG00000034387	protein_coding	cds	chr6-112387972-112387999	chr6-112387954-112388311	0
chr7-68716893-68718406	1.84063e-09	0.306479	0.163	0.048	0.000372383	ENSMUST00000048068	Arrdc4	ENSMUSG00000042659	protein_coding	utr	chr7-68737045-68739476	chr7-68716893-68718406	18638
chr16-13232653-13233731	1.84167e-09	0.297044	0.189	0.065	0.000372594	ENSMUST00000009713	Mkl2	ENSMUSG00000009569	protein_coding	exon	chr16-13256481-13256554	chr16-13232653-13233731	22749
chr9-32833301-32833709	1.84259e-09	0.283234	0.134	0.041	0.000372779	ENSMUST00000183423	Gm3331	ENSMUSG00000099148	lincRNA	exon	chr9-32833214-32834104	chr9-32833301-32833709	0
chr7-19843213-19845336	1.84669e-09	0.283251	0.209	0.073	0.000373608	ENSMUST00000172815	Gm19345	ENSMUSG00000092216	protein_coding	exon	chr7-19852003-19852200	chr7-19843213-19845336	6666
chr6-84640226-84641384	1.87387e-09	0.310744	0.186	0.07	0.000379108	ENSMUST00000160197	Exoc6b	ENSMUSG00000033769	protein_coding	gap	chr6-84625238-84746900	chr6-84640226-84641384	0
chr1-173801901-173803210	1.88206e-09	0.286915	0.088	0.013	0.000380766	ENSMUST00000192414	Ifi204	ENSMUSG00000073489	protein_coding	exon	chr1-173766811-173766943	chr1-173801901-173803210	34957
chr15-31341989-31342893	1.90094e-09	0.286985	0.23	0.094	0.000384585	ENSMUST00000156679	Ankrd33b	ENSMUSG00000022237	protein_coding	gap	chr15-31325216-31367038	chr15-31341989-31342893	0
chr7-130807720-130808089	1.90935e-09	0.280388	0.098	0.017	0.000386285	ENSMUST00000124096	Fgfr2	ENSMUSG00000030849	protein_coding	gap	chr7-130172940-133081756	chr7-130807720-130808089	0
chr7-45605681-45606404	1.92127e-09	0.258142	0.075	0.006	0.000388697	ENSMUST00000033099	Fgf21	ENSMUSG00000030827	protein_coding	utr	chr7-45613907-45614019	chr7-45605681-45606404	7502
chr5-3501125-3503560	1.92129e-09	0.255625	0.287	0.128	0.000388702	ENSMUST00000165117	Cdk6	ENSMUSG00000040274	protein_coding	gap	chr5-3473229-3515453	chr5-3501125-3503560	0
chr19-57203845-57204537	1.97017e-09	0.315239	0.165	0.046	0.000398591	ENSMUST00000156316	Ablim1	ENSMUSG00000025085	protein_coding	gap	chr19-57173460-57314692	chr19-57203845-57204537	0
chr6-17142700-17143488	1.98873e-09	0.286561	0.09	0.015	0.000402346	ENSMUST00000076654	Tes	ENSMUSG00000029552	protein_coding	utr	chr6-17104782-17105828	chr6-17142700-17143488	36871
chr12-8357119-8357841	2.00015e-09	0.291351	0.173	0.061	0.000404657	ENSMUST00000020927	Hs1bp3	ENSMUSG00000020605	protein_coding	utr	chr12-8342088-8343824	chr12-8357119-8357841	13294
chr9-98429763-98430087	2.00687e-09	0.238311	0.054	0.001	0.000406016	ENSMUST00000052068	Rbp1	ENSMUSG00000046402	protein_coding	gap	chr9-98425632-98444589	chr9-98429763-98430087	0
chr10-66919882-66921754	2.0395e-09	0.281889	0.248	0.109	0.000412618	ENSMUST00000181710	1110002J07Rik	ENSMUSG00000097134	lincRNA	gap	chr10-66918996-66919927	chr10-66919882-66921754	0
chr4-63594438-63595911	2.06157e-09	0.263959	0.109	0.022	0.000417083	ENSMUST00000136620	Gm11213	ENSMUSG00000084782	lincRNA	exon	chr4-63596902-63597222	chr4-63594438-63595911	990
chr5-74973784-74975769	2.08786e-09	0.286057	0.114	0.025	0.0004224	ENSMUST00000101121	Gm6116	ENSMUSG00000072874	lincRNA	exon	chr5-74966090-74966368	chr5-74973784-74975769	7415
chr4-118500179-118501233	2.12984e-09	0.307957	0.127	0.022	0.000430894	ENSMUST00000047421	Tie1	ENSMUSG00000033191	protein_coding	exon	chr4-118489648-118490061	chr4-118500179-118501233	10117
chr2-165404785-165405721	2.13881e-09	0.290551	0.196	0.062	0.000432709	ENSMUST00000109279	Slc13a3	ENSMUSG00000018459	protein_coding	utr	chr2-165405295-165406679	chr2-165404785-165405721	0
chr2-129166192-129167102	2.14908e-09	0.303147	0.191	0.062	0.000434787	ENSMUST00000028880	Slc20a1	ENSMUSG00000027397	protein_coding	exon	chr2-129198764-129198992	chr2-129166192-129167102	31661
chr15-84235232-84236065	2.14978e-09	0.287202	0.398	0.203	0.000434928	ENSMUST00000122818	Parvb	ENSMUSG00000022438	protein_coding	gap	chr15-84232187-84260645	chr15-84235232-84236065	0
chr15-86079565-86080210	2.15881e-09	0.268984	0.098	0.015	0.000436756	ENSMUST00000147286	Gramd4	ENSMUSG00000035900	protein_coding	gap	chr15-86074985-86091312	chr15-86079565-86080210	0
chr2-170306523-170308330	2.19879e-09	0.259208	0.145	0.045	0.000444843	ENSMUST00000154650	Bcas1	ENSMUSG00000013523	protein_coding	utr	chr2-170346991-170348073	chr2-170306523-170308330	38660
chr14-76657945-76658534	2.20703e-09	0.256734	0.103	0.019	0.000446511	ENSMUST00000189375	1700108F19Rik	ENSMUSG00000101009	processed_transcript	exon	chr14-76672963-76673014	chr14-76657945-76658534	14428
chr5-77372394-77373183	2.22916e-09	0.303329	0.132	0.032	0.000450988	ENSMUST00000163898	Igfbp7	ENSMUSG00000036256	protein_coding	gap	chr5-77355672-77401486	chr5-77372394-77373183	0
chr13-45974635-45975042	2.23318e-09	0.271128	0.152	0.052	0.000451801	ENSMUST00000038032	5033430I15Rik	ENSMUSG00000038152	lincRNA	exon	chr13-45965911-45966508	chr13-45974635-45975042	8126
chr14-76630110-76631688	2.24059e-09	0.256486	0.101	0.019	0.0004533	ENSMUST00000189375	1700108F19Rik	ENSMUSG00000101009	processed_transcript	exon	chr14-76672963-76673014	chr14-76630110-76631688	41274
chr2-71801668-71801933	2.25136e-09	0.27379	0.111	0.026	0.000455479	ENSMUST00000152009	Itga6	ENSMUSG00000027111	protein_coding	gap	chr2-71787321-71816629	chr2-71801668-71801933	0
chr5-29387777-29389666	2.27916e-09	0.272716	0.127	0.036	0.000461105	ENSMUST00000181005	4632411P08Rik	ENSMUSG00000097561	lincRNA	gap	chr5-29380212-29388764	chr5-29387777-29389666	0
chr3-108850224-108850981	2.28696e-09	0.232685	0.072	0.007	0.000462682	ENSMUST00000180063	Fndc7	ENSMUSG00000045326	protein_coding	utr	chr3-108853678-108856265	chr3-108850224-108850981	2696
chr2-93458636-93459859	2.33997e-09	0.268934	0.181	0.074	0.000473407	ENSMUST00000163052	Gm10804	ENSMUSG00000075025	lincRNA	gap	chr2-93455864-93465310	chr2-93458636-93459859	0
chr3-149236623-149236859	2.42214e-09	0.267261	0.088	0.013	0.00049003	ENSMUST00000180599	Gm10287	ENSMUSG00000070342	lincRNA	exon	chr3-149221687-149225745	chr3-149236623-149236859	10877
chr14-40955782-40957095	2.43222e-09	0.303276	0.243	0.104	0.000492069	ENSMUST00000047652	Tspan14	ENSMUSG00000037824	protein_coding	gap	chr14-40934286-40966775	chr14-40955782-40957095	0
chr10-96237653-96239324	2.43579e-09	0.278424	0.127	0.032	0.000492792	ENSMUST00000074615	Gm5426	ENSMUSG00000096486	protein_coding	cds	chr10-96136603-96136914	chr10-96237653-96239324	100738
chr14-69994270-69995387	2.46854e-09	0.250626	0.096	0.015	0.000499418	ENSMUST00000022678	Pebp4	ENSMUSG00000022085	protein_coding	gap	chr14-69963539-70045876	chr14-69994270-69995387	0
chr1-90412588-90413132	2.46866e-09	0.31436	0.22	0.074	0.000499443	ENSMUST00000187630	Gm28722	ENSMUSG00000101997	lincRNA	exon	chr1-90453394-90454264	chr1-90412588-90413132	40261
chr5-147725004-147727303	2.48077e-09	0.300469	0.302	0.123	0.000501891	ENSMUST00000110529	Flt1	ENSMUSG00000029648	protein_coding	cds	chr5-147725671-147725734	chr5-147725004-147727303	0
chr5-64201146-64201348	2.48657e-09	0.268151	0.085	0.012	0.000503066	ENSMUST00000147348	Tbc1d1	ENSMUSG00000029174	protein_coding	gap	chr5-64173897-64256714	chr5-64201146-64201348	0
chr15-74930436-74931204	2.50823e-09	0.310866	0.163	0.06	0.000507449	ENSMUST00000169343	Ly6e	ENSMUSG00000022587	protein_coding	exon	chr15-74955051-74955335	chr15-74930436-74931204	23846
chr7-136689437-136689729	2.51427e-09	0.251321	0.078	0.009	0.00050867	ENSMUST00000081510	Mgmt	ENSMUSG00000054612	protein_coding	exon	chr7-136894611-136894687	chr7-136689437-136689729	204881
chr7-122820724-122821591	2.52842e-09	0.296152	0.264	0.118	0.000511532	ENSMUST00000084615	Cacng3	ENSMUSG00000066189	protein_coding	utr	chr7-122768847-122769393	chr7-122820724-122821591	51330
chr4-134355820-134356467	2.53698e-09	0.236027	0.078	0.01	0.000513264	ENSMUST00000030643	Extl1	ENSMUSG00000028838	protein_coding	utr	chr4-134356372-134357647	chr4-134355820-134356467	0
chr1-173912556-173913768	2.54306e-09	0.237854	0.067	0.006	0.000514494	ENSMUST00000009340	Mnda	ENSMUSG00000026536	protein_coding	utr	chr1-173912814-173913046	chr1-173912556-173913768	0
chr11-119521736-119522629	2.63996e-09	0.289821	0.227	0.086	0.000534099	ENSMUST00000106245	Endov	ENSMUSG00000039850	protein_coding	utr	chr11-119507428-119511437	chr11-119521736-119522629	10298
chr16-38758165-38758802	2.64561e-09	0.301753	0.147	0.049	0.000535242	ENSMUST00000154902	B4galt4	ENSMUSG00000022793	protein_coding	gap	chr16-38757867-38763068	chr16-38758165-38758802	0
chr11-46065228-46065995	2.64778e-09	0.300844	0.287	0.129	0.000535681	ENSMUST00000011400	Adam19	ENSMUSG00000011256	protein_coding	gap	chr11-46065083-46093862	chr11-46065228-46065995	0
chr17-6016074-6016797	2.68798e-09	0.282153	0.142	0.039	0.000543813	ENSMUST00000154114	Synj2	ENSMUSG00000023805	protein_coding	cds	chr17-6016266-6016347	chr17-6016074-6016797	0
chr4-84523216-84524210	2.72674e-09	0.318377	0.127	0.026	0.000551654	ENSMUST00000177256	Bnc2	ENSMUSG00000028487	protein_coding	gap	chr4-84414349-84546204	chr4-84523216-84524210	0
chr9-48723146-48724180	2.81513e-09	0.315538	0.266	0.116	0.000569537	ENSMUST00000093852	Zbtb16	ENSMUSG00000066687	protein_coding	gap	chr9-48717370-48743463	chr9-48723146-48724180	0
chr1-90152806-90153710	2.81767e-09	0.274188	0.088	0.015	0.000570051	ENSMUST00000113094	Iqca	ENSMUSG00000026301	protein_coding	cds	chr1-90153165-90153175	chr1-90152806-90153710	0
chr8-64877587-64878153	2.82503e-09	0.242529	0.065	0.006	0.00057154	ENSMUST00000034017	Klhl2	ENSMUSG00000031605	protein_coding	exon	chr8-64849633-64849818	chr8-64877587-64878153	27768
chr3-138075141-138075480	2.86639e-09	0.217279	0.057	0.003	0.000579908	ENSMUST00000184925	1110002E22Rik	ENSMUSG00000090066	protein_coding	gap	chr3-138071854-138077163	chr3-138075141-138075480	0
chr6-116009506-116009772	2.90076e-09	0.288137	0.202	0.071	0.000586861	ENSMUST00000088896	Tmcc1	ENSMUSG00000030126	protein_coding	utr	chr6-116018618-116022086	chr6-116009506-116009772	8845
chr10-121903793-121904516	2.90113e-09	0.29716	0.124	0.025	0.000586936	ENSMUST00000162710	Srgap1	ENSMUSG00000020121	protein_coding	gap	chr10-121896746-121925815	chr10-121903793-121904516	0
chr10-91138260-91138659	2.9374e-09	0.265748	0.129	0.041	0.000594275	ENSMUST00000105293	Tmpo	ENSMUSG00000019961	protein_coding	utr	chr10-91147571-91149475	chr10-91138260-91138659	8911
chr15-61398771-61399131	2.97549e-09	0.286031	0.09	0.013	0.000601981	ENSMUST00000096418	A1bg	ENSMUSG00000022347	protein_coding	exon	chr15-60921223-60921270	chr15-61398771-61399131	477500
chr16-97307644-97307871	2.98526e-09	0.259237	0.067	0.009	0.000603957	ENSMUST00000047275	Bace2	ENSMUSG00000040605	protein_coding	exon	chr16-97356728-97357101	chr16-97307644-97307871	48856
chr1-138038491-138039578	2.99277e-09	0.278676	0.106	0.023	0.000605476	ENSMUST00000112036	Ptprc	ENSMUSG00000026395	protein_coding	exon	chr1-138062861-138064778	chr1-138038491-138039578	23282
chr6-50684674-50685509	3.00852e-09	0.28396	0.132	0.044	0.000608663	ENSMUST00000031853	Npvf	ENSMUSG00000029831	protein_coding	exon	chr6-50654256-50654439	chr6-50684674-50685509	30234
chr4-142097446-142098675	3.06571e-09	0.288953	0.31	0.129	0.000620233	ENSMUST00000155023	Kazn	ENSMUSG00000040606	protein_coding	utr	chr4-142102390-142104789	chr4-142097446-142098675	3714
chr3-51634420-51634736	3.14474e-09	0.292358	0.158	0.048	0.000636221	ENSMUST00000160753	Mgst2	ENSMUSG00000074604	protein_coding	exon	chr3-51660360-51660463	chr3-51634420-51634736	25623
chr3-122033064-122034329	3.18786e-09	0.28945	0.129	0.029	0.000644946	ENSMUST00000013995	Abca4	ENSMUSG00000028125	protein_coding	exon	chr3-122044443-122044612	chr3-122033064-122034329	10113
chr1-39713380-39715022	3.19458e-09	0.281134	0.339	0.167	0.000646304	ENSMUST00000151913	Rfx8	ENSMUSG00000057173	protein_coding	gap	chr1-39711440-39718417	chr1-39713380-39715022	0
chr3-89835377-89835715	3.22464e-09	0.303759	0.171	0.052	0.000652387	ENSMUST00000050401	She	ENSMUSG00000046280	protein_coding	gap	chr3-89834271-89849367	chr3-89835377-89835715	0
chr10-26798532-26800135	3.23073e-09	0.275939	0.269	0.123	0.000653618	ENSMUST00000176060	Arhgap18	ENSMUSG00000039031	protein_coding	gap	chr10-26753503-26845931	chr10-26798532-26800135	0
chr10-95116809-95117949	3.2505e-09	0.272008	0.09	0.017	0.000657618	ENSMUST00000053594	Cradd	ENSMUSG00000045867	protein_coding	utr	chr10-95174746-95175676	chr10-95116809-95117949	56796
chr11-76101270-76101682	3.27623e-09	0.261182	0.067	0.007	0.000662824	ENSMUST00000169734	Vps53	ENSMUSG00000017288	protein_coding	gap	chr11-76092316-76101986	chr11-76101270-76101682	0
chr3-39219791-39220834	3.28421e-09	0.322946	0.209	0.075	0.000664438	ENSMUST00000056409	Gm9845	ENSMUSG00000050533	protein_coding	utr	chr3-39357394-39358257	chr3-39219791-39220834	136559
chr6-86569255-86571998	3.29633e-09	0.289023	0.287	0.123	0.00066689	ENSMUST00000181928	1600020E01Rik	ENSMUSG00000097048	lincRNA	exon	chr6-86564276-86564442	chr6-86569255-86571998	4812
chr7-28381874-28383404	3.29879e-09	0.25998	0.452	0.237	0.000667389	ENSMUST00000051241	Zfp36	ENSMUSG00000044786	protein_coding	exon	chr7-28379174-28379255	chr7-28381874-28383404	2618
chr5-129940807-129942935	3.33633e-09	0.257605	0.628	0.36	0.000674982	ENSMUST00000073945	Vkorc1l1	ENSMUSG00000066735	protein_coding	cds	chr5-129942172-129942365	chr5-129940807-129942935	0
chr8-41017367-41017990	3.43184e-09	0.307263	0.186	0.065	0.000694305	ENSMUST00000155174	Mtus1	ENSMUSG00000045636	protein_coding	gap	chr8-41015455-41022379	chr8-41017367-41017990	0
chr1-105906139-105906876	3.43432e-09	0.272393	0.085	0.012	0.000694807	ENSMUST00000027559	Tnfrsf11a	ENSMUSG00000026321	protein_coding	utr	chr1-105844867-105847981	chr1-105906139-105906876	58157
chr11-44975159-44975429	3.46484e-09	0.27692	0.114	0.023	0.000700982	ENSMUST00000109268	Ebf1	ENSMUSG00000057098	protein_coding	gap	chr11-44972953-44990515	chr11-44975159-44975429	0
chr17-31162225-31163009	3.50892e-09	0.248858	0.065	0.004	0.000709901	ENSMUST00000024831	Tff1	ENSMUSG00000024032	protein_coding	cds	chr17-31162655-31162807	chr17-31162225-31163009	0
chr19-40630099-40631599	3.61059e-09	0.259822	0.098	0.016	0.000730469	ENSMUST00000134063	Entpd1	ENSMUSG00000048120	protein_coding	gap	chr19-40612524-40711162	chr19-40630099-40631599	0
chr15-36474427-36474640	3.64e-09	0.300074	0.116	0.032	0.00073642	ENSMUST00000057486	Ankrd46	ENSMUSG00000048307	protein_coding	utr	chr15-36477668-36479256	chr15-36474427-36474640	3027
chr4-54967735-54968037	3.70395e-09	0.309528	0.103	0.026	0.000749358	ENSMUST00000133895	Zfp462	ENSMUSG00000060206	protein_coding	gap	chr4-54945102-55007532	chr4-54967735-54968037	0
chr5-120643470-120644473	3.71589e-09	0.265803	0.083	0.013	0.000751772	ENSMUST00000161848	Gm15749	ENSMUSG00000089830	lincRNA	exon	chr5-120648040-120648275	chr5-120643470-120644473	3566
chr1-153559231-153560202	3.77021e-09	0.273507	0.132	0.03	0.000762763	ENSMUST00000041874	Npl	ENSMUSG00000042684	protein_coding	exon	chr1-153549648-153550045	chr1-153559231-153560202	9185
chr18-44714473-44714752	3.88682e-09	0.250377	0.062	0.003	0.000786354	ENSMUST00000089874	Mcc	ENSMUSG00000071856	protein_coding	gap	chr18-44534301-44724464	chr18-44714473-44714752	0
chr9-92249360-92250799	3.89522e-09	0.306388	0.256	0.104	0.000788054	ENSMUST00000186364	Plscr1	ENSMUSG00000032369	protein_coding	utr	chr9-92250342-92250424	chr9-92249360-92250799	0
chr9-13894222-13895131	3.89878e-09	0.258829	0.096	0.015	0.000788774	ENSMUST00000156680	Fam76b	ENSMUSG00000037808	protein_coding	utr	chr9-13844029-13846541	chr9-13894222-13895131	47680
chr10-77251234-77253133	3.92402e-09	0.277683	0.196	0.074	0.000793881	ENSMUST00000105408	Gm10941	ENSMUSG00000078444	protein_coding	utr	chr10-77257776-77257986	chr10-77251234-77253133	4642
chr12-72843629-72844657	3.92637e-09	0.295338	0.333	0.158	0.000794356	ENSMUST00000110489	4930447C04Rik	ENSMUSG00000021098	protein_coding	utr	chr12-72881109-72881227	chr12-72843629-72844657	36451
chr5-105799441-105800571	3.94985e-09	0.272731	0.096	0.019	0.000799106	ENSMUST00000156630	Lrrc8d	ENSMUSG00000046079	protein_coding	gap	chr5-105732375-105811723	chr5-105799441-105800571	0
chr18-64618189-64619224	3.95954e-09	0.282124	0.119	0.033	0.000801066	ENSMUST00000025482	Atp8b1	ENSMUSG00000039529	protein_coding	gap	chr18-64605401-64660699	chr18-64618189-64619224	0
chr10-102622479-102623033	4.01128e-09	0.223738	0.059	0.001	0.000811534	ENSMUST00000055355	Rassf9	ENSMUSG00000044921	protein_coding	utr	chr10-102546067-102546560	chr10-102622479-102623033	75918
chr2-167851266-167851970	4.0229e-09	0.288429	0.168	0.058	0.000813885	ENSMUST00000142937	Gm14319	ENSMUSG00000085411	lincRNA	exon	chr2-167858585-167859022	chr2-167851266-167851970	6614
chr16-32124105-32125158	4.02701e-09	0.269832	0.168	0.067	0.000814716	ENSMUST00000115168	Cep19	ENSMUSG00000035790	protein_coding	utr	chr16-32107268-32108069	chr16-32124105-32125158	16035
chr2-34954383-34954697	4.02846e-09	0.29229	0.137	0.028	0.000815011	ENSMUST00000172159	Traf1	ENSMUSG00000026875	protein_coding	gap	chr2-34949105-34956195	chr2-34954383-34954697	0
chr10-3630622-3631214	4.03424e-09	0.294645	0.183	0.055	0.000816179	ENSMUST00000019896	Iyd	ENSMUSG00000019762	protein_coding	utr	chr10-3554213-3554877	chr10-3630622-3631214	75744
chr18-76078396-76079579	4.13685e-09	0.279482	0.114	0.022	0.000836939	ENSMUST00000167921	Zbtb7c	ENSMUSG00000044646	protein_coding	gap	chr18-76059618-76136826	chr18-76078396-76079579	0
chr5-77386054-77387424	4.1593e-09	0.294547	0.16	0.052	0.00084148	ENSMUST00000163898	Igfbp7	ENSMUSG00000036256	protein_coding	gap	chr5-77355672-77401486	chr5-77386054-77387424	0
chr11-94346112-94347006	4.27653e-09	0.298587	0.158	0.036	0.000865198	ENSMUST00000178136	Abcc3	ENSMUSG00000020865	protein_coding	cds	chr11-94345947-94346141	chr11-94346112-94347006	0
chr11-101885105-101886903	4.3051e-09	0.299177	0.196	0.071	0.000870978	ENSMUST00000057054	Meox1	ENSMUSG00000001493	protein_coding	gap	chr11-101879437-101893542	chr11-101885105-101886903	0
chr8-119972561-119973278	4.38279e-09	0.258619	0.07	0.009	0.000886695	ENSMUST00000127664	Gm20388	ENSMUSG00000092329	protein_coding	gap	chr8-119910940-124295357	chr8-119972561-119973278	0
chr8-119715157-119715565	4.395e-09	0.298502	0.186	0.068	0.000889166	ENSMUST00000095171	Atp2c2	ENSMUSG00000034112	protein_coding	gap	chr8-119700258-119719191	chr8-119715157-119715565	0
chr13-99202035-99202432	4.41984e-09	0.257163	0.088	0.017	0.000894191	ENSMUST00000056558	Zfp366	ENSMUSG00000050919	protein_coding	gap	chr13-99184865-99228318	chr13-99202035-99202432	0
chr15-78257019-78258663	4.48116e-09	0.254382	0.165	0.06	0.000906597	ENSMUST00000146147	Ncf4	ENSMUSG00000071715	protein_coding	gap	chr15-78256030-78260623	chr15-78257019-78258663	0
chr4-98105751-98106144	4.53625e-09	0.288019	0.163	0.046	0.000917742	ENSMUST00000107062	Nfia	ENSMUSG00000028565	protein_coding	gap	chr4-98065447-98111217	chr4-98105751-98106144	0
chr10-93374723-93375697	4.5523e-09	0.285411	0.233	0.096	0.000920989	ENSMUST00000008542	Elk3	ENSMUSG00000008398	protein_coding	exon	chr10-93310752-93311135	chr10-93374723-93375697	63587
chr6-144045455-144045823	4.6796e-09	0.279191	0.088	0.013	0.000946743	ENSMUST00000170367	Sox5	ENSMUSG00000041540	protein_coding	gap	chr6-144041356-144116443	chr6-144045455-144045823	0
chr2-167121127-167121520	4.75745e-09	0.313626	0.14	0.042	0.000962493	ENSMUST00000059826	Kcnb1	ENSMUSG00000050556	protein_coding	gap	chr2-167106360-167188056	chr2-167121127-167121520	0
chr1-40187845-40188404	4.76235e-09	0.287698	0.098	0.013	0.000963486	ENSMUST00000027241	Il1r1	ENSMUSG00000026072	protein_coding	exon	chr1-40225080-40225306	chr1-40187845-40188404	36675
chr1-40171800-40172327	4.78844e-09	0.260924	0.085	0.013	0.000968763	ENSMUST00000027243	Il1r2	ENSMUSG00000026073	protein_coding	utr	chr1-40125208-40125231	chr1-40171800-40172327	46568
chr12-108265752-108266015	4.81268e-09	0.285277	0.114	0.029	0.000973668	ENSMUST00000136175	Ccdc85c	ENSMUSG00000084883	protein_coding	gap	chr12-108221783-108274337	chr12-108265752-108266015	0
chr7-99304106-99305342	4.86574e-09	0.29803	0.127	0.019	0.000984402	ENSMUST00000127492	Map6	ENSMUSG00000055407	protein_coding	gap	chr7-99269314-99315688	chr7-99304106-99305342	0
chr11-9117495-9118867	4.87309e-09	0.288673	0.32	0.152	0.00098589	ENSMUST00000172452	Upp1	ENSMUSG00000020407	protein_coding	utr	chr11-9118787-9118867	chr11-9117495-9118867	0
chr7-35920091-35920663	4.88193e-09	0.25259	0.067	0.003	0.000987678	ENSMUST00000187488	Gm28514	ENSMUSG00000100387	lincRNA	exon	chr7-35839506-35839570	chr7-35920091-35920663	80520
chr2-13413288-13414043	4.89798e-09	0.278212	0.258	0.11	0.000990925	ENSMUST00000091436	Cubn	ENSMUSG00000026726	protein_coding	gap	chr2-13404117-13424671	chr2-13413288-13414043	0
chr15-36875987-36876576	4.92412e-09	0.294733	0.217	0.09	0.000996213	ENSMUST00000100713	Gm10384	ENSMUSG00000072618	protein_coding	gap	chr15-36872418-36879687	chr15-36875987-36876576	0
chr5-137091584-137091803	4.968e-09	0.27312	0.078	0.009	0.00100509	ENSMUST00000054384	Trim56	ENSMUSG00000043279	protein_coding	utr	chr5-137105644-137112455	chr5-137091584-137091803	13840
chr10-116207883-116209026	4.97726e-09	0.302116	0.168	0.052	0.00100696	ENSMUST00000155606	Ptprr	ENSMUSG00000020151	protein_coding	gap	chr10-116188469-116226158	chr10-116207883-116209026	0
chr17-31060519-31061402	4.98776e-09	0.280431	0.189	0.084	0.00100909	ENSMUST00000139013	Abcg1	ENSMUSG00000024030	protein_coding	gap	chr17-31057857-31064384	chr17-31060519-31061402	0
chr6-115953957-115954242	5.00679e-09	0.251617	0.078	0.01	0.00101294	ENSMUST00000015511	Plxnd1	ENSMUSG00000030123	protein_coding	utr	chr6-115954811-115955739	chr6-115953957-115954242	568
chr1-105199127-105199722	5.03166e-09	0.299416	0.251	0.102	0.00101797	ENSMUST00000187882	Gm29012	ENSMUSG00000099669	lincRNA	exon	chr1-105127187-105127366	chr1-105199127-105199722	71760
chr3-145887351-145887751	5.05991e-09	0.250818	0.07	0.007	0.00102368	ENSMUST00000127193	Ddah1	ENSMUSG00000028194	protein_coding	gap	chr3-145853277-145889083	chr3-145887351-145887751	0
chr2-36069051-36069298	5.09837e-09	0.235345	0.057	0.003	0.00103147	ENSMUST00000028256	Morn5	ENSMUSG00000026894	protein_coding	gap	chr2-36057151-36079514	chr2-36069051-36069298	0
chr11-98773634-98774271	5.10011e-09	0.275912	0.46	0.258	0.00103182	ENSMUST00000064941	Nr1d1	ENSMUSG00000020889	protein_coding	gap	chr11-98772135-98774717	chr11-98773634-98774271	0
chr7-71583274-71583985	5.14476e-09	0.308391	0.106	0.02	0.00104085	ENSMUST00000190004	Gm29295	ENSMUSG00000099558	lincRNA	exon	chr7-71390486-71391272	chr7-71583274-71583985	192001
chr4-11917756-11918727	5.17589e-09	0.248907	0.088	0.013	0.00104715	ENSMUST00000108297	Pdp1	ENSMUSG00000049225	protein_coding	utr	chr4-11958184-11960572	chr4-11917756-11918727	39456
chr19-10279433-10280066	5.25722e-09	0.271199	0.111	0.028	0.0010636	ENSMUST00000125567	Dagla	ENSMUSG00000035735	protein_coding	gap	chr19-10271632-10304820	chr19-10279433-10280066	0
chr2-79566201-79566712	5.26309e-09	0.273192	0.09	0.01	0.00106479	ENSMUST00000111785	Ssfa2	ENSMUSG00000027007	protein_coding	exon	chr2-79635352-79635744	chr2-79566201-79566712	68639
chr4-150706987-150708054	5.27102e-09	0.284715	0.183	0.057	0.0010664	ENSMUST00000149065	Gm16079	ENSMUSG00000085869	lincRNA	exon	chr4-150678465-150678792	chr4-150706987-150708054	28194
chr9-32836441-32836711	5.30397e-09	0.237447	0.07	0.007	0.00107306	ENSMUST00000183423	Gm3331	ENSMUSG00000099148	lincRNA	exon	chr9-32833214-32834104	chr9-32836441-32836711	2336
chr15-81253577-81254618	5.3646e-09	0.26125	0.078	0.01	0.00108533	ENSMUST00000166855	Mchr1	ENSMUSG00000050164	protein_coding	utr	chr15-81238113-81238963	chr15-81253577-81254618	14613
chr1-155805732-155806033	5.38558e-09	0.280442	0.109	0.025	0.00108957	ENSMUST00000194632	Qsox1	ENSMUSG00000033684	protein_coding	gap	chr1-155803798-155812525	chr1-155805732-155806033	0
chr5-74896972-74897642	5.43932e-09	0.257698	0.088	0.012	0.00110045	ENSMUST00000101121	Gm6116	ENSMUSG00000072874	lincRNA	exon	chr5-74949194-74949462	chr5-74896972-74897642	51551
chr18-4737569-4738397	5.55774e-09	0.316602	0.212	0.075	0.0011244	ENSMUST00000037029	9430020K01Rik	ENSMUSG00000033960	protein_coding	utr	chr18-4680261-4682868	chr18-4737569-4738397	54700
chr8-126847440-126848360	5.6265e-09	0.263597	0.214	0.09	0.00113831	ENSMUST00000179857	Tomm20	ENSMUSG00000093904	protein_coding	utr	chr8-126930664-126935014	chr8-126847440-126848360	82303
chr15-77856412-77856916	5.7087e-09	0.291781	0.199	0.084	0.00115494	ENSMUST00000016771	Myh9	ENSMUSG00000022443	protein_coding	exon	chr15-77841957-77842175	chr15-77856412-77856916	14236
chr1-39851098-39851730	5.75547e-09	0.29221	0.101	0.016	0.00116441	ENSMUST00000186683	1700066B17Rik	ENSMUSG00000101634	lincRNA	exon	chr1-39847309-39847334	chr1-39851098-39851730	3763
chr5-142998248-142998474	5.77099e-09	0.265053	0.127	0.035	0.00116755	ENSMUST00000053498	Rnf216	ENSMUSG00000045078	protein_coding	gap	chr5-142993572-143015623	chr5-142998248-142998474	0
chr8-78742040-78743198	5.84737e-09	0.286678	0.292	0.125	0.001183	ENSMUST00000034111	Slc10a7	ENSMUSG00000031684	protein_coding	utr	chr8-78731639-78734005	chr8-78742040-78743198	8034
chr4-145319100-145319720	5.89141e-09	0.273625	0.114	0.023	0.00119191	ENSMUST00000123027	Tnfrsf8	ENSMUSG00000028602	protein_coding	exon	chr4-145315022-145315164	chr4-145319100-145319720	3935
chr2-72070025-72070550	5.93684e-09	0.279776	0.194	0.074	0.0012011	ENSMUST00000150234	Rapgef4	ENSMUSG00000049044	protein_coding	gap	chr2-72045249-72137241	chr2-72070025-72070550	0
chr3-28491290-28491579	5.99163e-09	0.260777	0.062	0.006	0.00121218	ENSMUST00000162777	Tnik	ENSMUSG00000027692	protein_coding	gap	chr3-28359057-28493966	chr3-28491290-28491579	0
chr10-93122639-93124656	6.03234e-09	0.259881	0.274	0.134	0.00122042	ENSMUST00000069965	Cdk17	ENSMUSG00000020015	protein_coding	exon	chr10-93160876-93161200	chr10-93122639-93124656	36219
chr4-142103147-142103573	6.10572e-09	0.262737	0.09	0.016	0.00123527	ENSMUST00000155023	Kazn	ENSMUSG00000040606	protein_coding	utr	chr4-142102390-142104789	chr4-142103147-142103573	0
chr13-92241359-92242025	6.16239e-09	0.281158	0.142	0.036	0.00124673	ENSMUST00000191550	Msh3	ENSMUSG00000014850	protein_coding	gap	chr13-92235732-92249826	chr13-92241359-92242025	0
chr8-128437516-128437769	6.16288e-09	0.257732	0.109	0.028	0.00124683	ENSMUST00000026917	Nrp1	ENSMUSG00000025810	protein_coding	gap	chr8-128434376-128457856	chr8-128437516-128437769	0
chr12-86786773-86787579	6.24529e-09	0.262075	0.124	0.03	0.0012635	ENSMUST00000095527	Lrrc74a	ENSMUSG00000059114	protein_coding	utr	chr12-86763624-86763795	chr12-86786773-86787579	22977
chr13-21939964-21941254	6.29484e-09	0.311187	0.261	0.112	0.00127353	ENSMUST00000176511	Zfp184	ENSMUSG00000006720	protein_coding	exon	chr13-21945094-21945199	chr13-21939964-21941254	3839
chr12-55473345-55474458	6.41636e-09	0.298432	0.235	0.097	0.00129811	ENSMUST00000021413	Nfkbia	ENSMUSG00000021025	protein_coding	utr	chr12-55489411-55489921	chr12-55473345-55474458	14952
chr1-135410761-135411554	6.46588e-09	0.292145	0.165	0.054	0.00130813	ENSMUST00000161838	Ipo9	ENSMUSG00000041879	protein_coding	gap	chr1-135406850-135426930	chr1-135410761-135411554	0
chr9-120775324-120778045	6.61314e-09	0.273896	0.256	0.109	0.00133792	ENSMUST00000188320	1700020M21Rik	ENSMUSG00000100146	lincRNA	exon	chr9-120913774-120914090	chr9-120775324-120778045	135728
chr10-39218013-39218781	6.61788e-09	0.279585	0.116	0.032	0.00133888	ENSMUST00000076713	Wisp3	ENSMUSG00000062074	protein_coding	exon	chr10-39163593-39163794	chr10-39218013-39218781	54218
chr2-102450190-102452391	6.6508e-09	0.277142	0.145	0.042	0.00134554	ENSMUST00000099678	Fjx1	ENSMUSG00000075012	protein_coding	cds	chr2-102450236-102451588	chr2-102450190-102452391	0
chr15-100760954-100762308	6.67846e-09	0.292191	0.22	0.099	0.00135114	ENSMUST00000161564	Slc4a8	ENSMUSG00000023032	protein_coding	cds	chr15-100761930-100761974	chr15-100760954-100762308	0
chr9-60989989-60990202	6.82478e-09	0.244759	0.057	0.003	0.00138074	ENSMUST00000050183	Uaca	ENSMUSG00000034485	protein_coding	utr	chr9-60880246-60880370	chr9-60989989-60990202	109618
chr14-21279029-21279459	6.89427e-09	0.242947	0.078	0.01	0.0013948	ENSMUST00000045376	Adk	ENSMUSG00000039197	protein_coding	gap	chr14-21240572-21318012	chr14-21279029-21279459	0
chr8-119709016-119710011	6.91274e-09	0.263978	0.116	0.029	0.00139854	ENSMUST00000095171	Atp2c2	ENSMUSG00000034112	protein_coding	gap	chr8-119700258-119719191	chr8-119709016-119710011	0
chr18-61952653-61954058	7.00388e-09	0.268977	0.359	0.196	0.00141698	ENSMUST00000051720	Sh3tc2	ENSMUSG00000045629	protein_coding	cds	chr18-61953116-61953167	chr18-61952653-61954058	0
chr9-69442362-69443018	7.07343e-09	0.285409	0.171	0.052	0.00143105	ENSMUST00000071565	Gm4978	ENSMUSG00000062874	protein_coding	cds	chr9-69450232-69451035	chr9-69442362-69443018	7213
chr2-167774893-167775765	7.08905e-09	0.271335	0.305	0.154	0.00143421	ENSMUST00000139927	Gm14321	ENSMUSG00000084797	lincRNA	exon	chr2-167777467-167777666	chr2-167774893-167775765	1701
chr5-32416723-32417242	7.18171e-09	0.264116	0.114	0.022	0.00145295	ENSMUST00000015100	Ppp1cb	ENSMUSG00000014956	protein_coding	exon	chr5-32458974-32459407	chr5-32416723-32417242	41731
chr17-74866622-74867221	7.22344e-09	0.293918	0.155	0.042	0.0014614	ENSMUST00000024882	Ttc27	ENSMUSG00000024078	protein_coding	utr	chr17-74863457-74863570	chr17-74866622-74867221	3051
chr5-106384081-106384380	7.22398e-09	0.241586	0.062	0.004	0.00146151	ENSMUST00000086795	Barhl2	ENSMUSG00000034384	protein_coding	utr	chr5-106452523-106453356	chr5-106384081-106384380	68142
chr3-51196723-51197750	7.2975e-09	0.278021	0.233	0.086	0.00147638	ENSMUST00000023849	Ccrn4l	ENSMUSG00000023087	protein_coding	exon	chr3-51224447-51225287	chr3-51196723-51197750	26696
chr11-97412036-97413125	7.34919e-09	0.284924	0.23	0.099	0.00148684	ENSMUST00000121799	Arhgap23	ENSMUSG00000049807	protein_coding	exon	chr11-97415533-97415667	chr11-97412036-97413125	2407
chr19-34352773-34353906	7.39881e-09	0.295253	0.173	0.062	0.00149688	ENSMUST00000025691	Fas	ENSMUSG00000024778	protein_coding	utr	chr19-34327325-34327770	chr19-34352773-34353906	25002
chr5-24360508-24361445	7.39896e-09	0.28457	0.202	0.081	0.00149691	ENSMUST00000030834	Nos3	ENSMUSG00000028978	protein_coding	exon	chr5-24364810-24365001	chr5-24360508-24361445	3364
chr19-44280737-44281228	7.4192e-09	0.274935	0.109	0.026	0.001501	ENSMUST00000026221	Scd2	ENSMUSG00000025203	protein_coding	exon	chr19-44293676-44294411	chr19-44280737-44281228	12447
chr3-79558820-79559647	7.45162e-09	0.298713	0.134	0.041	0.00150756	ENSMUST00000139171	Fnip2	ENSMUSG00000061175	protein_coding	gap	chr3-79506279-79567508	chr3-79558820-79559647	0
chr11-7552238-7552458	7.47479e-09	0.245432	0.057	0.003	0.00151225	ENSMUST00000149481	Gm11986	ENSMUSG00000087637	lincRNA	exon	chr11-7289505-7290374	chr11-7552238-7552458	261863
chr12-55464391-55465915	7.50205e-09	0.285893	0.209	0.078	0.00151776	ENSMUST00000021413	Nfkbia	ENSMUSG00000021025	protein_coding	utr	chr12-55489411-55489921	chr12-55464391-55465915	23495
chr7-136852739-136853006	7.53056e-09	0.283911	0.101	0.015	0.00152353	ENSMUST00000081510	Mgmt	ENSMUSG00000054612	protein_coding	exon	chr7-136894611-136894687	chr7-136852739-136853006	41604
chr2-137644661-137645048	7.57338e-09	0.260958	0.09	0.012	0.00153219	ENSMUST00000134833	Gm14064	ENSMUSG00000085640	lincRNA	exon	chr2-137663435-137663587	chr2-137644661-137645048	18386
chr18-66441979-66443064	7.60132e-09	0.291878	0.173	0.057	0.00153785	ENSMUST00000025399	Pmaip1	ENSMUSG00000024521	protein_coding	exon	chr18-66458604-66458812	chr18-66441979-66443064	15539
chr15-38383990-38385122	7.64468e-09	0.2839	0.401	0.196	0.00154662	ENSMUST00000181144	Gm26863	ENSMUSG00000097645	lincRNA	exon	chr15-38384981-38385264	chr15-38383990-38385122	0
chr2-84936429-84938970	7.64786e-09	0.292682	0.251	0.103	0.00154726	ENSMUST00000141650	Slc43a3	ENSMUSG00000027074	protein_coding	cds	chr2-84938223-84938352	chr2-84936429-84938970	0
chr12-54251915-54252532	7.74433e-09	0.22806	0.059	0.003	0.00156678	ENSMUST00000039516	Egln3	ENSMUSG00000035105	protein_coding	exon	chr12-54203205-54203860	chr12-54251915-54252532	48054
chr13-76538925-76539426	7.85816e-09	0.254246	0.075	0.006	0.00158981	ENSMUST00000125209	Mctp1	ENSMUSG00000021596	protein_coding	gap	chr13-76385252-76641711	chr13-76538925-76539426	0
chr4-109664863-109667280	7.86309e-09	0.280599	0.357	0.184	0.0015908	ENSMUST00000097921	Cdkn2c	ENSMUSG00000028551	protein_coding	cds	chr4-109665018-109665146	chr4-109664863-109667280	0
chr8-106349302-106349807	7.93729e-09	0.232505	0.054	0.001	0.00160582	ENSMUST00000180410	Gm26786	ENSMUSG00000097026	lincRNA	gap	chr8-106237924-106419506	chr8-106349302-106349807	0
chr17-67329374-67329843	7.95966e-09	0.238532	0.072	0.007	0.00161034	ENSMUST00000037974	Ptprm	ENSMUSG00000033278	protein_coding	gap	chr17-67191372-67353956	chr17-67329374-67329843	0
chr9-44129636-44130395	7.97401e-09	0.294091	0.326	0.161	0.00161325	ENSMUST00000180670	Gm10687	ENSMUSG00000097617	lincRNA	gap	chr9-44125294-44134360	chr9-44129636-44130395	0
chr3-122635174-122635486	7.97717e-09	0.2892	0.124	0.032	0.00161389	ENSMUST00000162409	Fnbp1l	ENSMUSG00000039735	protein_coding	exon	chr3-122619530-122619667	chr3-122635174-122635486	15506
chr16-34389729-34390162	8.01636e-09	0.258133	0.067	0.004	0.00162181	ENSMUST00000151491	Kalrn	ENSMUSG00000061751	protein_coding	gap	chr16-34385400-34392034	chr16-34389729-34390162	0
chr11-88570626-88570988	8.04335e-09	0.279782	0.129	0.036	0.00162727	ENSMUST00000148013	Msi2	ENSMUSG00000069769	protein_coding	gap	chr11-88480055-88590054	chr11-88570626-88570988	0
chr11-5505825-5506434	8.1066e-09	0.288764	0.152	0.048	0.00164007	ENSMUST00000063084	Xbp1	ENSMUSG00000020484	protein_coding	exon	chr11-5520659-5521200	chr11-5505825-5506434	14224
chr8-36163823-36164425	8.11547e-09	0.279637	0.16	0.046	0.00164187	ENSMUST00000110492	D8Ertd82e	ENSMUSG00000050271	protein_coding	utr	chr8-36147418-36147787	chr8-36163823-36164425	16035
chr7-113185654-113186769	8.12599e-09	0.285489	0.183	0.06	0.00164399	ENSMUST00000047321	Arntl	ENSMUSG00000055116	protein_coding	exon	chr7-113207465-113207644	chr7-113185654-113186769	20695
chr11-116705136-116705573	8.14052e-09	0.286152	0.137	0.039	0.00164693	ENSMUST00000079545	St6galnac2	ENSMUSG00000057286	protein_coding	exon	chr11-116694437-116694868	chr11-116705136-116705573	10267
chr9-64048362-64050812	8.14077e-09	0.271127	0.287	0.122	0.00164698	ENSMUST00000181151	1110036E04Rik	ENSMUSG00000097036	lincRNA	gap	chr9-64049896-64053188	chr9-64048362-64050812	0
chr11-60360471-60360920	8.26401e-09	0.306371	0.183	0.064	0.00167192	ENSMUST00000128905	Lrrc48	ENSMUSG00000056598	protein_coding	gap	chr11-60354201-60363463	chr11-60360471-60360920	0
chr9-67260830-67261291	8.39569e-09	0.267024	0.101	0.025	0.00169856	ENSMUST00000040025	Tln2	ENSMUSG00000052698	protein_coding	gap	chr9-67258588-67261890	chr9-67260830-67261291	0
chr5-150611208-150612289	8.42023e-09	0.269691	0.145	0.045	0.00170352	ENSMUST00000164332	N4bp2l2	ENSMUSG00000029655	protein_coding	gap	chr5-150608441-150643168	chr5-150611208-150612289	0
chr11-68863358-68865309	8.63283e-09	0.28419	0.349	0.173	0.00174653	ENSMUST00000127469	Ndel1	ENSMUSG00000018736	protein_coding	gap	chr11-68845425-68864921	chr11-68863358-68865309	0
chr13-97580157-97580784	8.71606e-09	0.308024	0.15	0.052	0.00176337	ENSMUST00000179324	Lincenc1	ENSMUSG00000078952	lincRNA	exon	chr13-97494405-97497007	chr13-97580157-97580784	83149
chr5-137776181-137776910	8.75564e-09	0.297894	0.176	0.061	0.00177138	ENSMUST00000126126	Ppp1r35	ENSMUSG00000029725	protein_coding	exon	chr5-137778849-137778897	chr5-137776181-137776910	1938
chr15-31417525-31419320	8.76052e-09	0.29591	0.274	0.132	0.00177237	ENSMUST00000110408	Ropn1l	ENSMUSG00000022236	protein_coding	utr	chr15-31441210-31441316	chr15-31417525-31419320	21889
chr15-74988261-74989674	8.90865e-09	0.305757	0.202	0.089	0.00180234	ENSMUST00000023250	Ly6i	ENSMUSG00000022586	protein_coding	exon	chr15-74982990-74983430	chr15-74988261-74989674	4830
chr18-56781956-56782314	8.91572e-09	0.252723	0.085	0.013	0.00180377	ENSMUST00000102912	March3	ENSMUSG00000032656	protein_coding	gap	chr18-56762569-56783018	chr18-56781956-56782314	0
chr6-31624212-31624725	9.09502e-09	0.283407	0.168	0.052	0.00184004	ENSMUST00000149613	Gm13847	ENSMUSG00000086804	lincRNA	gap	chr6-31605453-31742952	chr6-31624212-31624725	0
chr1-159928754-159929484	9.10854e-09	0.291678	0.101	0.025	0.00184278	ENSMUST00000192069	Tnr	ENSMUSG00000015829	protein_coding	utr	chr1-159924214-159931729	chr1-159928754-159929484	0
chr7-84261385-84261687	9.12697e-09	0.259603	0.083	0.013	0.0018465	ENSMUST00000085077	Arnt2	ENSMUSG00000015709	protein_coding	gap	chr7-84251503-84262392	chr7-84261385-84261687	0
chr7-84228368-84228599	9.13406e-09	0.23261	0.062	0.004	0.00184794	ENSMUST00000085077	Arnt2	ENSMUSG00000015709	protein_coding	utr	chr7-84246281-84250055	chr7-84228368-84228599	17681
chr9-120690862-120692452	9.23343e-09	0.289129	0.274	0.113	0.00186804	ENSMUST00000064646	5830454E08Rik	ENSMUSG00000052658	protein_coding	utr	chr9-120577709-120578072	chr9-120690862-120692452	112789
chr15-99420485-99421505	9.29597e-09	0.279246	0.274	0.123	0.0018807	ENSMUST00000023747	Nckap5l	ENSMUSG00000023009	protein_coding	utr	chr15-99422035-99422698	chr15-99420485-99421505	529
chr7-140840977-140841583	9.31318e-09	0.263209	0.106	0.019	0.00188418	ENSMUST00000185612	Urah	ENSMUSG00000025481	protein_coding	utr	chr7-140837776-140837971	chr7-140840977-140841583	3005
chr4-44091987-44092195	9.50187e-09	0.236877	0.057	0.004	0.00192235	ENSMUST00000146576	Gm12503	ENSMUSG00000087326	processed_transcript	exon	chr4-44092632-44092777	chr4-44091987-44092195	436
chr7-19875970-19877451	9.5066e-09	0.264825	0.191	0.073	0.00192331	ENSMUST00000052605	Ceacam19	ENSMUSG00000049848	protein_coding	utr	chr7-19875742-19878126	chr7-19875970-19877451	0
chr18-12294850-12295294	9.60651e-09	0.307898	0.152	0.036	0.00194352	ENSMUST00000142066	Ankrd29	ENSMUSG00000057766	protein_coding	gap	chr18-12282402-12305610	chr18-12294850-12295294	0
chr16-97534523-97536387	9.70322e-09	0.297278	0.235	0.089	0.00196309	ENSMUST00000000395	Tmprss2	ENSMUSG00000000385	protein_coding	utr	chr16-97564684-97566139	chr16-97534523-97536387	28296
chr7-110276514-110276798	9.73341e-09	0.253369	0.075	0.01	0.0019692	ENSMUST00000033325	Swap70	ENSMUSG00000031015	protein_coding	gap	chr7-110274802-110279179	chr7-110276514-110276798	0
chr5-124891699-124892345	9.7882e-09	0.255774	0.09	0.016	0.00198028	ENSMUST00000141533	Zfp664	ENSMUSG00000079215	protein_coding	gap	chr5-124884773-124901261	chr5-124891699-124892345	0
chr1-74027464-74028010	9.90072e-09	0.299472	0.22	0.089	0.00200304	ENSMUST00000191204	Tns1	ENSMUSG00000055322	protein_coding	gap	chr1-74016187-74068608	chr1-74027464-74028010	0
chr6-52801781-52802635	9.92875e-09	0.287807	0.181	0.07	0.00200872	ENSMUST00000136250	Jazf1	ENSMUSG00000063568	protein_coding	gap	chr6-52777705-52812102	chr6-52801781-52802635	0
chr1-128704453-128705884	9.99109e-09	0.280478	0.158	0.06	0.00202133	ENSMUST00000181951	Gm26686	ENSMUSG00000097283	lincRNA	exon	chr1-128770599-128772859	chr1-128704453-128705884	64714
chr5-106891379-106892210	1.00484e-08	0.272638	0.109	0.026	0.00203293	ENSMUST00000148495	Hfm1	ENSMUSG00000043410	protein_coding	gap	chr5-106889950-106895195	chr5-106891379-106892210	0
chr2-35271599-35272106	1.00499e-08	0.263323	0.075	0.013	0.00203322	ENSMUST00000142324	Gsn	ENSMUSG00000026879	protein_coding	exon	chr2-35279663-35279718	chr2-35271599-35272106	7556
chr17-57246835-57250663	1.00736e-08	0.239933	0.568	0.348	0.00203803	ENSMUST00000019631	Trip10	ENSMUSG00000019487	protein_coding	cds	chr17-57249548-57249571	chr17-57246835-57250663	0
chr16-95347209-95347464	1.01498e-08	0.299078	0.109	0.028	0.00205344	ENSMUST00000113846	Erg	ENSMUSG00000040732	protein_coding	utr	chr16-95359169-95360805	chr16-95347209-95347464	11704
chr10-54026637-54027187	1.0187e-08	0.256016	0.116	0.026	0.00206096	ENSMUST00000146483	Man1a	ENSMUSG00000003746	protein_coding	gap	chr10-54025830-54030697	chr10-54026637-54027187	0
chr3-104794016-104794854	1.02124e-08	0.295131	0.31	0.158	0.00206609	ENSMUST00000106787	Rhoc	ENSMUSG00000002233	protein_coding	cds	chr3-104793870-104794043	chr3-104794016-104794854	0
chr12-111386044-111387449	1.03058e-08	0.267665	0.38	0.192	0.00208501	ENSMUST00000041965	Cdc42bpb	ENSMUSG00000021279	protein_coding	exon	chr12-111377097-111377718	chr12-111386044-111387449	8325
chr3-107796308-107796965	1.03402e-08	0.256783	0.078	0.01	0.00209196	ENSMUST00000014743	Csf1	ENSMUSG00000014599	protein_coding	exon	chr3-107760025-107760469	chr3-107796308-107796965	35838
chr3-68469703-68470346	1.04082e-08	0.24587	0.075	0.01	0.00210572	ENSMUST00000182532	Schip1	ENSMUSG00000027777	protein_coding	gap	chr3-68468230-68494573	chr3-68469703-68470346	0
chr9-56505187-56507100	1.06415e-08	0.282922	0.287	0.126	0.00215292	ENSMUST00000034879	Hmg20a	ENSMUSG00000032329	protein_coding	utr	chr9-56494533-56496884	chr9-56505187-56507100	8302
chr18-69781923-69782736	1.06443e-08	0.285741	0.23	0.089	0.00215348	ENSMUST00000078486	Tcf4	ENSMUSG00000053477	protein_coding	utr	chr18-69683077-69687967	chr18-69781923-69782736	93955
chr11-77981398-77984869	1.07836e-08	0.26241	0.589	0.343	0.00218167	ENSMUST00000108360	Phf12	ENSMUSG00000037791	protein_coding	cds	chr11-77984016-77984197	chr11-77981398-77984869	0
chr8-11372147-11372426	1.09985e-08	0.259078	0.085	0.01	0.00222514	ENSMUST00000033899	Col4a2	ENSMUSG00000031503	protein_coding	gap	chr8-11354358-11398661	chr8-11372147-11372426	0
chr2-164513042-164513770	1.11102e-08	0.273335	0.258	0.104	0.00224774	ENSMUST00000152522	Pigt	ENSMUSG00000017721	protein_coding	utr	chr2-164507275-164508301	chr2-164513042-164513770	4740
chr5-125273563-125274120	1.13893e-08	0.291855	0.14	0.044	0.0023042	ENSMUST00000086075	Scarb1	ENSMUSG00000037936	protein_coding	utr	chr5-125277087-125277865	chr5-125273563-125274120	2966
chr3-52369834-52370421	1.14074e-08	0.255638	0.096	0.016	0.00230786	ENSMUST00000053764	Foxo1	ENSMUSG00000044167	protein_coding	utr	chr3-52346996-52353221	chr3-52369834-52370421	16612
chr2-122719143-122719560	1.14812e-08	0.23154	0.054	0.003	0.00232279	ENSMUST00000153728	4930417H01Rik	ENSMUSG00000087017	processed_transcript	gap	chr2-122719365-122720515	chr2-122719143-122719560	0
chr10-96458656-96459528	1.15258e-08	0.21378	0.057	0.004	0.00233182	ENSMUST00000038377	Btg1	ENSMUSG00000036478	protein_coding	exon	chr10-96617001-96617472	chr10-96458656-96459528	157472
chr4-132944845-132947126	1.16094e-08	0.268913	0.269	0.119	0.00234874	ENSMUST00000030696	Fam76a	ENSMUSG00000028878	protein_coding	exon	chr4-132922358-132922558	chr4-132944845-132947126	22286
chr5-105835783-105836356	1.1642e-08	0.292449	0.119	0.032	0.00235534	ENSMUST00000140081	Lrrc8d	ENSMUSG00000046079	protein_coding	exon	chr5-105832187-105832436	chr5-105835783-105836356	3346
chr7-105480878-105482734	1.16912e-08	0.292263	0.258	0.099	0.00236528	ENSMUST00000047040	Prkcdbp	ENSMUSG00000037060	protein_coding	cds	chr7-105481776-105482159	chr7-105480878-105482734	0
chr2-90652104-90653399	1.1726e-08	0.290814	0.186	0.061	0.00237232	ENSMUST00000057481	Nup160	ENSMUSG00000051329	protein_coding	exon	chr2-90677215-90677470	chr2-90652104-90653399	23815
chr17-26388134-26388466	1.17327e-08	0.259528	0.067	0.007	0.00237368	ENSMUST00000182897	Neurl1b	ENSMUSG00000034413	protein_coding	exon	chr17-26414829-26414995	chr17-26388134-26388466	26362
chr11-84959602-84960271	1.17701e-08	0.289243	0.127	0.028	0.00238125	ENSMUST00000150596	Car4	ENSMUSG00000000805	protein_coding	gap	chr11-84958051-84962385	chr11-84959602-84960271	0
chr11-70305682-70306652	1.17754e-08	0.267476	0.124	0.039	0.00238233	ENSMUST00000019051	Alox12e	ENSMUSG00000018907	protein_coding	utr	chr11-70315610-70315870	chr11-70305682-70306652	8957
chr4-53263344-53264308	1.18033e-08	0.285841	0.145	0.032	0.00238796	ENSMUST00000186737	AI427809	ENSMUSG00000086712	lincRNA	gap	chr4-53263235-53265248	chr4-53263344-53264308	0
chr1-21014285-21015240	1.18395e-08	0.27965	0.152	0.039	0.00239528	ENSMUST00000187210	Tram2	ENSMUSG00000041779	protein_coding	gap	chr1-21013512-21037396	chr1-21014285-21015240	0
chr16-32672231-32672639	1.18578e-08	0.288666	0.096	0.019	0.00239899	ENSMUST00000115126	Tnk2	ENSMUSG00000022791	protein_coding	gap	chr16-32671634-32675521	chr16-32672231-32672639	0
chr15-89170167-89170417	1.19744e-08	0.267493	0.163	0.057	0.00242257	ENSMUST00000109331	Plxnb2	ENSMUSG00000036606	protein_coding	gap	chr15-89168028-89170568	chr15-89170167-89170417	0
chr10-111271589-111271924	1.20246e-08	0.259389	0.075	0.01	0.00243273	ENSMUST00000105275	Osbpl8	ENSMUSG00000020189	protein_coding	gap	chr10-111270663-111272073	chr10-111271589-111271924	0
chr13-102877089-102877479	1.22756e-08	0.250251	0.101	0.026	0.00248351	ENSMUST00000194446	Mast4	ENSMUSG00000034751	protein_coding	gap	chr13-102853920-103007204	chr13-102877089-102877479	0
chr16-78489621-78491377	1.23849e-08	0.299609	0.181	0.07	0.00250563	ENSMUST00000114220	D16Ertd472e	ENSMUSG00000022864	protein_coding	utr	chr16-78544012-78545117	chr16-78489621-78491377	52634
chr11-106674197-106675652	1.24333e-08	0.278136	0.331	0.17	0.00251542	ENSMUST00000183610	Pecam1	ENSMUSG00000020717	protein_coding	gap	chr11-106671799-106679548	chr11-106674197-106675652	0
chr13-48314532-48314830	1.25726e-08	0.250637	0.07	0.006	0.00254359	ENSMUST00000180777	A330048O09Rik	ENSMUSG00000097326	lincRNA	exon	chr13-48273763-48273884	chr13-48314532-48314830	40647
chr3-21995551-21996146	1.25744e-08	0.282826	0.09	0.016	0.00254397	ENSMUST00000063988	Tbl1xr1	ENSMUSG00000027630	protein_coding	exon	chr3-22076652-22076954	chr3-21995551-21996146	80505
chr18-38523750-38524708	1.2695e-08	0.274241	0.106	0.023	0.00256836	ENSMUST00000025293	Ndfip1	ENSMUSG00000024425	protein_coding	utr	chr18-38464277-38464399	chr18-38523750-38524708	59350
chr4-126226644-126228364	1.28336e-08	0.277793	0.307	0.145	0.00259641	ENSMUST00000125981	Map7d1	ENSMUSG00000028849	protein_coding	utr	chr4-126232167-126232755	chr4-126226644-126228364	3802
chr10-26762108-26762837	1.29943e-08	0.229786	0.067	0.007	0.00262892	ENSMUST00000176060	Arhgap18	ENSMUSG00000039031	protein_coding	gap	chr10-26753503-26845931	chr10-26762108-26762837	0
chr2-160317960-160318556	1.32939e-08	0.22003	0.054	0.003	0.00268953	ENSMUST00000099127	Gm826	ENSMUSG00000074623	protein_coding	cds	chr2-160317985-160318015	chr2-160317960-160318556	0
chr14-63962491-63963086	1.34186e-08	0.296104	0.204	0.078	0.00271475	ENSMUST00000022532	4930578I06Rik	ENSMUSG00000021961	protein_coding	utr	chr14-63971122-63971224	chr14-63962491-63963086	8035
chr8-71633999-71634615	1.37758e-08	0.268484	0.098	0.023	0.00278703	ENSMUST00000177517	Unc13a	ENSMUSG00000034799	protein_coding	cds	chr8-71634517-71634664	chr8-71633999-71634615	0
chr11-77765098-77765605	1.37843e-08	0.280518	0.183	0.065	0.00278875	ENSMUST00000164315	Myo18a	ENSMUSG00000000631	protein_coding	utr	chr11-77765603-77765716	chr11-77765098-77765605	0
chr2-84229245-84230139	1.38456e-08	0.29619	0.186	0.054	0.00280114	ENSMUST00000074262	Calcrl	ENSMUSG00000059588	protein_coding	utr	chr2-84330626-84333453	chr2-84229245-84230139	100486
chr15-6386248-6386940	1.39177e-08	0.283839	0.245	0.099	0.00281573	ENSMUST00000161812	Dab2	ENSMUSG00000022150	protein_coding	utr	chr15-6386777-6386932	chr15-6386248-6386940	0
chr10-95465388-95465900	1.4079e-08	0.234472	0.065	0.007	0.00284837	ENSMUST00000075829	Mrpl42	ENSMUSG00000062981	protein_coding	utr	chr10-95480806-95480931	chr10-95465388-95465900	14905
chr12-100887549-100888271	1.40827e-08	0.227166	0.072	0.012	0.00284911	ENSMUST00000110066	Gpr68	ENSMUSG00000047415	protein_coding	utr	chr12-100887681-100888072	chr12-100887549-100888271	0
chr5-143642230-143642633	1.40976e-08	0.251519	0.103	0.029	0.00285212	ENSMUST00000177281	Cyth3	ENSMUSG00000018001	protein_coding	gap	chr5-143636553-143684395	chr5-143642230-143642633	0
chr11-117824140-117824897	1.40991e-08	0.275751	0.202	0.093	0.00285243	ENSMUST00000026661	Tk1	ENSMUSG00000025574	protein_coding	cds	chr11-117824671-117824781	chr11-117824140-117824897	0
chr1-4602167-4602741	1.41137e-08	0.293884	0.147	0.051	0.00285539	ENSMUST00000195771	RP23-37D15.1	ENSMUSG00000104328	lincRNA	exon	chr1-4585937-4586252	chr1-4602167-4602741	15914
chr2-102052857-102053258	1.41149e-08	0.300133	0.137	0.03	0.00285562	ENSMUST00000111222	Ldlrad3	ENSMUSG00000048058	protein_coding	gap	chr2-101955175-102057906	chr2-102052857-102053258	0
chr10-62216681-62217574	1.41555e-08	0.277028	0.152	0.049	0.00286384	ENSMUST00000047883	Tspan15	ENSMUSG00000037031	protein_coding	gap	chr10-62203266-62231019	chr10-62216681-62217574	0
chr3-86793407-86794130	1.41803e-08	0.261436	0.214	0.094	0.00286886	ENSMUST00000195561	Dclk2	ENSMUSG00000028078	protein_coding	cds	chr3-86793817-86793913	chr3-86793407-86794130	0
chr7-113133834-113134238	1.42319e-08	0.249118	0.106	0.022	0.00287929	ENSMUST00000158046	Gm23662	ENSMUSG00000088671	rRNA	exon	chr7-113119698-113119808	chr7-113133834-113134238	14025
chr3-151293888-151294581	1.43144e-08	0.279222	0.173	0.06	0.00289599	ENSMUST00000046977	Eltd1	ENSMUSG00000039167	protein_coding	exon	chr3-151437887-151438004	chr3-151293888-151294581	143305
chr11-76260755-76261655	1.43453e-08	0.294378	0.207	0.078	0.00290224	ENSMUST00000021204	Nxn	ENSMUSG00000020844	protein_coding	cds	chr11-76261542-76261666	chr11-76260755-76261655	0
chr18-11316340-11316734	1.49695e-08	0.240161	0.067	0.009	0.00302852	ENSMUST00000047762	Gata6	ENSMUSG00000005836	protein_coding	utr	chr18-11084483-11085635	chr18-11316340-11316734	230704
chr5-147589725-147590262	1.50483e-08	0.291816	0.129	0.036	0.00304447	ENSMUST00000031653	Flt1	ENSMUSG00000029648	protein_coding	cds	chr5-147589762-147589875	chr5-147589725-147590262	0
chr8-113655769-113656708	1.51038e-08	0.252998	0.09	0.017	0.0030557	ENSMUST00000095173	Syce1l	ENSMUSG00000033409	protein_coding	utr	chr8-113655465-113655533	chr8-113655769-113656708	235
chr2-103343624-103343946	1.51048e-08	0.269645	0.098	0.019	0.00305591	ENSMUST00000139065	A930006I01Rik	ENSMUSG00000087278	lincRNA	gap	chr2-103342031-103372616	chr2-103343624-103343946	0
chr13-112760187-112760928	1.51421e-08	0.292496	0.196	0.081	0.00306345	ENSMUST00000052514	Slc38a9	ENSMUSG00000047789	protein_coding	utr	chr13-112731665-112738743	chr13-112760187-112760928	21443
chr6-115908486-115910284	1.52291e-08	0.266403	0.289	0.147	0.00308104	ENSMUST00000112925	Ift122	ENSMUSG00000030323	protein_coding	cds	chr6-115910225-115910391	chr6-115908486-115910284	0
chr3-52954304-52956058	1.52393e-08	0.266283	0.315	0.144	0.00308311	ENSMUST00000036665	Cog6	ENSMUSG00000027742	protein_coding	utr	chr3-52981875-52983043	chr3-52954304-52956058	25816
chr8-94999991-95000990	1.52987e-08	0.28521	0.279	0.128	0.00309513	ENSMUST00000179619	Gpr56	ENSMUSG00000031785	protein_coding	gap	chr8-94977418-95002438	chr8-94999991-95000990	0
chr10-68137274-68137777	1.53331e-08	0.277574	0.114	0.029	0.00310209	ENSMUST00000020106	Arid5b	ENSMUSG00000019947	protein_coding	gap	chr10-68135107-68186025	chr10-68137274-68137777	0
chr2-141587276-141587637	1.53401e-08	0.22793	0.057	0.003	0.00310349	ENSMUST00000138786	Macrod2	ENSMUSG00000068205	protein_coding	gap	chr2-141555853-141724623	chr2-141587276-141587637	0
chr1-91062259-91062757	1.53525e-08	0.272891	0.212	0.09	0.003106	ENSMUST00000189617	Lrrfip1	ENSMUSG00000026305	protein_coding	gap	chr1-91053724-91068562	chr1-91062259-91062757	0
chr15-62136958-62137287	1.53814e-08	0.221861	0.052	0.003	0.00311186	ENSMUST00000183297	Pvt1	ENSMUSG00000097039	lincRNA	gap	chr15-62107466-62175466	chr15-62136958-62137287	0
chr8-94714295-94714953	1.54226e-08	0.260575	0.106	0.025	0.0031202	ENSMUST00000034227	Pllp	ENSMUSG00000031775	protein_coding	exon	chr8-94696036-94696242	chr8-94714295-94714953	18052
chr4-142081564-142082071	1.57255e-08	0.260843	0.106	0.026	0.00318147	ENSMUST00000036572	Tmem51	ENSMUSG00000040616	protein_coding	gap	chr4-142037934-142084061	chr4-142081564-142082071	0
chr14-27131457-27131873	1.57954e-08	0.237305	0.085	0.017	0.00319562	ENSMUST00000035336	Il17rd	ENSMUSG00000040717	protein_coding	utr	chr14-27101387-27107286	chr14-27131457-27131873	24170
chr2-22680009-22680254	1.58521e-08	0.247987	0.065	0.004	0.0032071	ENSMUST00000028123	Gad2	ENSMUSG00000026787	protein_coding	gap	chr2-22674023-22681287	chr2-22680009-22680254	0
chr15-88837012-88838245	1.59042e-08	0.276291	0.344	0.168	0.00321762	ENSMUST00000024042	Creld2	ENSMUSG00000023272	protein_coding	utr	chr15-88826437-88826681	chr15-88837012-88838245	10330
chr11-88993186-88993996	1.60636e-08	0.271461	0.152	0.06	0.00324987	ENSMUST00000128078	Gm11496	ENSMUSG00000085152	lincRNA	gap	chr11-88993478-88996401	chr11-88993186-88993996	0
chr10-126986461-126986960	1.61013e-08	0.294075	0.181	0.061	0.00325751	ENSMUST00000105256	Ctdsp2	ENSMUSG00000078429	protein_coding	gap	chr10-126979302-126991530	chr10-126986461-126986960	0
chr2-83714498-83715071	1.62517e-08	0.286423	0.14	0.033	0.00328793	ENSMUST00000028499	Itgav	ENSMUSG00000027087	protein_coding	exon	chr2-83724397-83724919	chr2-83714498-83715071	9325
chr2-131124116-131124549	1.62624e-08	0.269124	0.101	0.023	0.00329009	ENSMUST00000099349	Hspa12b	ENSMUSG00000074793	protein_coding	exon	chr2-131127280-131127514	chr2-131124116-131124549	2730
chr7-98542446-98543185	1.6272e-08	0.269805	0.15	0.054	0.00329203	ENSMUST00000069035	A630091E08Rik	ENSMUSG00000055446	protein_coding	utr	chr7-98543378-98543596	chr7-98542446-98543185	192
chr13-94132271-94133013	1.63361e-08	0.268665	0.114	0.023	0.00330501	ENSMUST00000156071	Lhfpl2	ENSMUSG00000045312	protein_coding	gap	chr13-94120836-94174022	chr13-94132271-94133013	0
chr12-116231331-116232406	1.64121e-08	0.265294	0.093	0.016	0.00332037	ENSMUST00000039349	Wdr60	ENSMUSG00000042050	protein_coding	cds	chr12-116231689-116231777	chr12-116231331-116232406	0
chr12-100937245-100937880	1.66624e-08	0.240276	0.067	0.007	0.00337101	ENSMUST00000085096	Ccdc88c	ENSMUSG00000021182	protein_coding	cds	chr12-100937830-100938107	chr12-100937245-100937880	0
chr5-147651143-147651825	1.66928e-08	0.256492	0.093	0.023	0.00337718	ENSMUST00000110529	Flt1	ENSMUSG00000029648	protein_coding	gap	chr5-147646234-147655096	chr5-147651143-147651825	0
chr9-107295483-107297282	1.72511e-08	0.26545	0.419	0.234	0.00349012	ENSMUST00000168260	Cish	ENSMUSG00000032578	protein_coding	cds	chr9-107297015-107297034	chr9-107295483-107297282	0
chr11-100721184-100721649	1.72761e-08	0.267616	0.147	0.052	0.00349517	ENSMUST00000155500	Rab5c	ENSMUSG00000019173	protein_coding	utr	chr11-100721501-100721650	chr11-100721184-100721649	0
chr6-86479344-86479543	1.73313e-08	0.272646	0.098	0.022	0.00350635	ENSMUST00000154066	A430078I02Rik	ENSMUSG00000085589	processed_transcript	gap	chr6-86475779-86480665	chr6-86479344-86479543	0
chr14-121822495-121823423	1.74069e-08	0.267872	0.114	0.029	0.00352165	ENSMUST00000100299	Dock9	ENSMUSG00000025558	protein_coding	exon	chr14-121797490-121797734	chr14-121822495-121823423	24760
chr6-91715119-91715322	1.74453e-08	0.263881	0.088	0.016	0.00352941	ENSMUST00000032185	Slc6a6	ENSMUSG00000030096	protein_coding	gap	chr6-91699033-91723281	chr6-91715119-91715322	0
chr10-77583587-77584311	1.75792e-08	0.29435	0.23	0.099	0.0035565	ENSMUST00000161165	Pttg1ip	ENSMUSG00000009291	protein_coding	cds	chr10-77584005-77584023	chr10-77583587-77584311	0
chr5-135834348-135835776	1.75882e-08	0.276039	0.096	0.022	0.00355832	ENSMUST00000144211	Srrm3	ENSMUSG00000039860	protein_coding	cds	chr5-135835050-135835282	chr5-135834348-135835776	0
chr4-47149838-47150276	1.75927e-08	0.234068	0.059	0.006	0.00355924	ENSMUST00000045041	Galnt12	ENSMUSG00000039774	protein_coding	utr	chr4-47122578-47123070	chr4-47149838-47150276	26767
chr7-16830476-16830702	1.76906e-08	0.275871	0.158	0.061	0.00357904	ENSMUST00000184708	Strn4	ENSMUSG00000030374	protein_coding	cds	chr7-16830326-16830485	chr7-16830476-16830702	0
chr7-45682416-45683033	1.77394e-08	0.289233	0.15	0.051	0.0035889	ENSMUST00000040636	Sec1	ENSMUSG00000040364	protein_coding	gap	chr7-45679525-45684179	chr7-45682416-45683033	0
chr15-98155938-98156316	1.79162e-08	0.242557	0.088	0.013	0.00362469	ENSMUST00000143400	Asb8	ENSMUSG00000048175	protein_coding	gap	chr15-98142815-98165470	chr15-98155938-98156316	0
chr2-69135005-69136249	1.79638e-08	0.273299	0.145	0.051	0.0036343	ENSMUST00000041865	Nostrin	ENSMUSG00000034738	protein_coding	cds	chr2-69135890-69135916	chr2-69135005-69136249	0
chr12-105769646-105770039	1.79674e-08	0.257979	0.085	0.013	0.00363503	ENSMUST00000040876	Ak7	ENSMUSG00000041323	protein_coding	gap	chr12-105768751-105780849	chr12-105769646-105770039	0
chr11-95507048-95507539	1.80222e-08	0.217075	0.057	0.003	0.00364612	ENSMUST00000058866	Nxph3	ENSMUSG00000046719	protein_coding	utr	chr11-95509845-95510827	chr11-95507048-95507539	2305
chr11-119855982-119857091	1.80589e-08	0.274454	0.214	0.084	0.00365356	ENSMUST00000136662	Rptor	ENSMUSG00000025583	protein_coding	cds	chr11-119856259-119856384	chr11-119855982-119857091	0
chr1-177643799-177644583	1.81171e-08	0.215153	0.054	0.004	0.00366532	ENSMUST00000189507	2310043L19Rik	ENSMUSG00000101746	lincRNA	exon	chr1-177642707-177642943	chr1-177643799-177644583	855
chr9-72191746-72192420	1.8122e-08	0.283005	0.137	0.048	0.00366631	ENSMUST00000185132	Gm27159	ENSMUSG00000099020	lincRNA	exon	chr9-72179497-72179758	chr9-72191746-72192420	11987
chr1-58742159-58743686	1.82119e-08	0.272217	0.132	0.048	0.00368451	ENSMUST00000140940	Cflar	ENSMUSG00000026031	protein_coding	gap	chr1-58741047-58752338	chr1-58742159-58743686	0
chr7-145221654-145222659	1.83108e-08	0.265494	0.109	0.019	0.00370451	ENSMUST00000058022	Tpcn2	ENSMUSG00000048677	protein_coding	utr	chr7-145253923-145254619	chr7-145221654-145222659	31263
chr6-29088310-29088619	1.84513e-08	0.245311	0.072	0.009	0.00373293	ENSMUST00000069789	Lep	ENSMUSG00000059201	protein_coding	utr	chr6-29071183-29073877	chr6-29088310-29088619	14432
chr6-31369746-31371424	1.86439e-08	0.271853	0.165	0.064	0.00377191	ENSMUST00000156115	Gm14532	ENSMUSG00000086931	lincRNA	gap	chr6-31356927-31372274	chr6-31369746-31371424	0
chr15-83295986-83296420	1.87656e-08	0.266741	0.132	0.036	0.00379653	ENSMUST00000067215	Arfgap3	ENSMUSG00000054277	protein_coding	utr	chr15-83299740-83300684	chr15-83295986-83296420	3319
chr19-10690401-10690746	1.88777e-08	0.282283	0.14	0.035	0.00381921	ENSMUST00000087951	Vps37c	ENSMUSG00000048832	protein_coding	gap	chr19-10688980-10706209	chr19-10690401-10690746	0
chr11-20858717-20859720	1.89939e-08	0.297535	0.282	0.122	0.00384272	ENSMUST00000123160	Gm12037	ENSMUSG00000086749	lincRNA	exon	chr11-20831690-20831919	chr11-20858717-20859720	26797
chr6-84058533-84059176	1.91577e-08	0.27933	0.158	0.055	0.00387585	ENSMUST00000168387	Dysf	ENSMUSG00000033788	protein_coding	gap	chr6-84058525-84063320	chr6-84058533-84059176	0
chr5-139060323-139061340	1.93126e-08	0.277948	0.147	0.035	0.00390719	ENSMUST00000148002	Prkar1b	ENSMUSG00000025855	protein_coding	gap	chr5-139050817-139062553	chr5-139060323-139061340	0
chr11-30160688-30161608	1.94721e-08	0.288144	0.307	0.144	0.00393946	ENSMUST00000124231	Sptbn1	ENSMUSG00000020315	protein_coding	gap	chr11-30159446-30219578	chr11-30160688-30161608	0
chr11-95088732-95089694	1.9726e-08	0.281055	0.302	0.157	0.00399083	ENSMUST00000120375	Itga3	ENSMUSG00000001507	protein_coding	exon	chr11-95076768-95076801	chr11-95088732-95089694	11930
chr3-95870813-95872086	1.99562e-08	0.270517	0.155	0.058	0.0040374	ENSMUST00000142437	Mrps21	ENSMUSG00000054312	protein_coding	utr	chr3-95871322-95871367	chr3-95870813-95872086	0
chr12-51728975-51729516	2.00102e-08	0.274259	0.103	0.025	0.00404833	ENSMUST00000021338	Ap4s1	ENSMUSG00000020955	protein_coding	gap	chr12-51723049-51730887	chr12-51728975-51729516	0
chr12-26356088-26356549	2.00317e-08	0.257141	0.103	0.023	0.00405267	ENSMUST00000062149	Rnf144a	ENSMUSG00000020642	protein_coding	gap	chr12-26339452-26389393	chr12-26356088-26356549	0
chr18-46615059-46615938	2.00672e-08	0.261942	0.165	0.051	0.00405987	ENSMUST00000078079	Eif1a	ENSMUSG00000057561	protein_coding	utr	chr18-46608135-46610225	chr18-46615059-46615938	4833
chr4-135312481-135314758	2.02291e-08	0.269672	0.318	0.142	0.00409261	ENSMUST00000105861	Srrm1	ENSMUSG00000028809	protein_coding	utr	chr4-135320484-135321346	chr4-135312481-135314758	5725
chr5-105797991-105798974	2.02638e-08	0.250832	0.114	0.03	0.00409964	ENSMUST00000156630	Lrrc8d	ENSMUSG00000046079	protein_coding	gap	chr5-105732375-105811723	chr5-105797991-105798974	0
chr6-134261537-134263778	2.04196e-08	0.274712	0.163	0.049	0.00413116	ENSMUST00000111963	Etv6	ENSMUSG00000030199	protein_coding	cds	chr6-134263019-134263119	chr6-134261537-134263778	0
chr17-26582211-26582688	2.04702e-08	0.289261	0.183	0.068	0.00414139	ENSMUST00000167662	Ergic1	ENSMUSG00000001576	protein_coding	gap	chr17-26561633-26608592	chr17-26582211-26582688	0
chr2-38609957-38610508	2.05404e-08	0.231165	0.054	0.003	0.00415558	ENSMUST00000028083	Psmb7	ENSMUSG00000026750	protein_coding	gap	chr2-38590849-38613431	chr2-38609957-38610508	0
chr6-118065024-118067068	2.0582e-08	0.301298	0.256	0.12	0.004164	ENSMUST00000164960	Rasgef1a	ENSMUSG00000030134	protein_coding	cds	chr6-118066445-118066462	chr6-118065024-118067068	0
chr4-123787316-123787962	2.06221e-08	0.255325	0.096	0.015	0.00417212	ENSMUST00000053202	Rhbdl2	ENSMUSG00000043333	protein_coding	utr	chr4-123787875-123787971	chr4-123787316-123787962	0
chr13-40978524-40979052	2.06375e-08	0.270846	0.121	0.029	0.00417523	ENSMUST00000153685	A730081D07Rik	ENSMUSG00000086693	processed_transcript	gap	chr13-40960149-41001065	chr13-40978524-40979052	0
chr12-72084336-72086607	2.08742e-08	0.249272	0.607	0.369	0.00422313	ENSMUST00000125764	Jkamp	ENSMUSG00000005078	protein_coding	cds	chr12-72085667-72085673	chr12-72084336-72086607	0
chr5-118404133-118404930	2.10899e-08	0.258056	0.096	0.025	0.00426675	ENSMUST00000191508	Gm28563	ENSMUSG00000100766	lincRNA	exon	chr5-118332136-118332306	chr5-118404133-118404930	71826
chr13-90515656-90516437	2.11656e-08	0.31572	0.282	0.107	0.00428208	ENSMUST00000179654	Gm21726	ENSMUSG00000094277	protein_coding	exon	chr13-90583400-90583765	chr13-90515656-90516437	66962
chr5-125215345-125216431	2.12228e-08	0.263403	0.15	0.051	0.00429365	ENSMUST00000111398	Ncor2	ENSMUSG00000029478	protein_coding	exon	chr5-125178997-125179219	chr5-125215345-125216431	36125
chr7-80403658-80404527	2.13016e-08	0.269509	0.23	0.093	0.0043096	ENSMUST00000135306	Furin	ENSMUSG00000030530	protein_coding	gap	chr7-80398929-80405318	chr7-80403658-80404527	0
chr2-163736001-163736213	2.16396e-08	0.272586	0.121	0.038	0.00437797	ENSMUST00000017841	Ada	ENSMUSG00000017697	protein_coding	gap	chr2-163735472-163738162	chr2-163736001-163736213	0
chr10-56486403-56486880	2.17526e-08	0.249169	0.067	0.003	0.00440083	ENSMUST00000068581	Gja1	ENSMUSG00000050953	protein_coding	utr	chr10-56388696-56390419	chr10-56486403-56486880	95983
chr4-155487780-155488548	2.18195e-08	0.282051	0.282	0.125	0.00441438	ENSMUST00000165335	Gnb1	ENSMUSG00000029064	protein_coding	exon	chr4-155491361-155491580	chr4-155487780-155488548	2812
chr11-69578810-69581657	2.18213e-08	0.249827	0.429	0.247	0.00441473	ENSMUST00000132548	Wrap53	ENSMUSG00000041346	protein_coding	cds	chr11-69578670-69579052	chr11-69578810-69581657	0
chr4-155776919-155777211	2.20662e-08	0.246408	0.083	0.013	0.00446428	ENSMUST00000180784	Gm26840	ENSMUSG00000097728	lincRNA	exon	chr4-155773673-155776161	chr4-155776919-155777211	757
chr2-164874179-164874613	2.26761e-08	0.282707	0.181	0.075	0.00458766	ENSMUST00000145327	Pcif1	ENSMUSG00000039849	protein_coding	exon	chr2-164879304-164879489	chr2-164874179-164874613	4690
chr15-78835075-78836598	2.27418e-08	0.286926	0.3	0.151	0.00460097	ENSMUST00000059619	Cdc42ep1	ENSMUSG00000049521	protein_coding	exon	chr15-78842647-78842725	chr15-78835075-78836598	6048
chr11-104596197-104596787	2.27606e-08	0.25529	0.093	0.019	0.00460477	ENSMUST00000136244	Myl4	ENSMUSG00000061086	protein_coding	utr	chr11-104595364-104595753	chr11-104596197-104596787	443
chr11-68474518-68474938	2.27695e-08	0.230964	0.054	0.003	0.00460656	ENSMUST00000154220	Pik3r5	ENSMUSG00000020901	protein_coding	gap	chr11-68473911-68475402	chr11-68474518-68474938	0
chr8-107254396-107255529	2.2937e-08	0.276572	0.142	0.039	0.00464046	ENSMUST00000080443	Rps18-ps3	ENSMUSG00000057657	protein_coding	cds	chr8-107262817-107263248	chr8-107254396-107255529	7287
chr18-75562029-75563647	2.31042e-08	0.290069	0.15	0.044	0.00467428	ENSMUST00000165559	Ctif	ENSMUSG00000052928	protein_coding	gap	chr18-75521870-75565003	chr18-75562029-75563647	0
chr5-146776900-146777475	2.31659e-08	0.262774	0.096	0.017	0.00468676	ENSMUST00000085614	Usp12	ENSMUSG00000029640	protein_coding	gap	chr5-146769018-146794614	chr5-146776900-146777475	0
chr15-99449030-99449725	2.3174e-08	0.27544	0.116	0.03	0.0046884	ENSMUST00000161948	Nckap5l	ENSMUSG00000023009	protein_coding	gap	chr15-99434190-99457631	chr15-99449030-99449725	0
chr17-31874032-31874306	2.32446e-08	0.289946	0.173	0.057	0.00470268	ENSMUST00000024839	Sik1	ENSMUSG00000024042	protein_coding	exon	chr17-31855672-31855792	chr17-31874032-31874306	18239
chr2-93261522-93262794	2.32515e-08	0.282552	0.243	0.1	0.00470408	ENSMUST00000111265	Tspan18	ENSMUSG00000027217	protein_coding	gap	chr2-93224579-93311946	chr2-93261522-93262794	0
chr19-6476916-6477272	2.33018e-08	0.262285	0.101	0.023	0.00471425	ENSMUST00000150792	Nrxn2	ENSMUSG00000033768	protein_coding	gap	chr19-6473757-6481109	chr19-6476916-6477272	0
chr2-36034987-36036014	2.36858e-08	0.243685	0.07	0.007	0.00479195	ENSMUST00000070112	Ndufa8	ENSMUSG00000026895	protein_coding	utr	chr2-36036326-36036503	chr2-36034987-36036014	311
chr1-89069268-89071251	2.37534e-08	0.261421	0.55	0.319	0.00480562	ENSMUST00000066279	Sh3bp4	ENSMUSG00000036206	protein_coding	utr	chr1-89070415-89070597	chr1-89069268-89071251	0
chr2-83690523-83690804	2.42356e-08	0.227744	0.062	0.003	0.00490317	ENSMUST00000081591	Zc3h15	ENSMUSG00000027091	protein_coding	utr	chr2-83664011-83664622	chr2-83690523-83690804	25900
chr2-128745687-128747069	2.44632e-08	0.287094	0.111	0.022	0.00494922	ENSMUST00000014505	Mertk	ENSMUSG00000014361	protein_coding	gap	chr2-128738370-128750099	chr2-128745687-128747069	0
chr15-82021887-82022999	2.45216e-08	0.25079	0.08	0.009	0.00496104	ENSMUST00000170630	Xrcc6	ENSMUSG00000022471	protein_coding	cds	chr15-82022807-82023061	chr15-82021887-82022999	0
chr8-126849290-126850180	2.47293e-08	0.249937	0.31	0.155	0.00500306	ENSMUST00000179857	Tomm20	ENSMUSG00000093904	protein_coding	utr	chr8-126930664-126935014	chr8-126849290-126850180	80483
chr5-115534345-115535271	2.48033e-08	0.267804	0.287	0.135	0.00501803	ENSMUST00000152156	Pxn	ENSMUSG00000029528	protein_coding	gap	chr5-115506869-115544342	chr5-115534345-115535271	0
chr18-82791099-82793285	2.4882e-08	0.277013	0.3	0.129	0.00503395	ENSMUST00000188435	2210420H20Rik	ENSMUSG00000101773	lincRNA	exon	chr18-82758814-82759041	chr18-82791099-82793285	32057
chr1-90225408-90226044	2.48999e-08	0.275386	0.109	0.026	0.00503758	ENSMUST00000065587	Ackr3	ENSMUSG00000044337	protein_coding	utr	chr1-90214910-90216751	chr1-90225408-90226044	8656
chr2-60901206-60902039	2.52433e-08	0.249194	0.183	0.075	0.00510705	ENSMUST00000028347	Rbms1	ENSMUSG00000026970	protein_coding	gap	chr2-60842473-60962690	chr2-60901206-60902039	0
chr6-128102047-128103018	2.52676e-08	0.27316	0.351	0.173	0.00511196	ENSMUST00000146268	Tspan9	ENSMUSG00000030352	protein_coding	gap	chr6-128083482-128140699	chr6-128102047-128103018	0
chr1-23200407-23200749	2.53246e-08	0.277913	0.103	0.032	0.00512349	ENSMUST00000182303	Gm27028	ENSMUSG00000097970	lincRNA	exon	chr1-23291537-23291935	chr1-23200407-23200749	90787
chr11-62819933-62821351	2.55535e-08	0.279117	0.235	0.093	0.0051698	ENSMUST00000108703	Trim16	ENSMUSG00000047821	protein_coding	cds	chr11-62820766-62820999	chr11-62819933-62821351	0
chr4-135306577-135307658	2.56453e-08	0.282694	0.235	0.1	0.00518838	ENSMUST00000105861	Srrm1	ENSMUSG00000028809	protein_coding	utr	chr4-135320484-135321346	chr4-135306577-135307658	12825
chr1-172712064-172712308	2.57446e-08	0.228467	0.065	0.007	0.00520847	ENSMUST00000194251	Crp	ENSMUSG00000037942	protein_coding	gap	chr1-172698201-172831282	chr1-172712064-172712308	0
chr5-76540101-76540481	2.57981e-08	0.278124	0.101	0.02	0.0052193	ENSMUST00000131470	Exoc1	ENSMUSG00000036435	protein_coding	gap	chr5-76537858-76542050	chr5-76540101-76540481	0
chr7-19635196-19635641	2.5984e-08	0.214981	0.059	0.003	0.00525691	ENSMUST00000055242	Clptm1	ENSMUSG00000002981	protein_coding	cds	chr7-19635308-19635403	chr7-19635196-19635641	0
chr18-57686764-57687049	2.68302e-08	0.272202	0.093	0.02	0.0054281	ENSMUST00000135806	1700011I03Rik	ENSMUSG00000058925	protein_coding	gap	chr18-57594136-57730714	chr18-57686764-57687049	0
chr18-60637668-60638641	2.70086e-08	0.261778	0.106	0.017	0.00546419	ENSMUST00000154857	Synpo	ENSMUSG00000043079	protein_coding	gap	chr18-60630086-60648218	chr18-60637668-60638641	0
chr13-90745014-90745389	2.72221e-08	0.241315	0.067	0.004	0.00550738	ENSMUST00000183162	Atp6ap1l	ENSMUSG00000078958	protein_coding	utr	chr13-90883433-90883774	chr13-90745014-90745389	138043
chr5-116407848-116408296	2.72741e-08	0.264346	0.111	0.033	0.0055179	ENSMUST00000036991	Hspb8	ENSMUSG00000041548	protein_coding	utr	chr5-116408491-116409330	chr5-116407848-116408296	194
chr2-4542460-4542917	2.72949e-08	0.267973	0.098	0.02	0.00552212	ENSMUST00000177457	Frmd4a	ENSMUSG00000026657	protein_coding	gap	chr2-4537326-4560213	chr2-4542460-4542917	0
chr5-43799251-43799849	2.75715e-08	0.205814	0.057	0.006	0.00557808	ENSMUST00000114047	Fbxl5	ENSMUSG00000039753	protein_coding	gap	chr5-43773660-43821540	chr5-43799251-43799849	0
chr7-63815329-63817412	2.7678e-08	0.263177	0.204	0.081	0.00559961	ENSMUST00000058476	Otud7a	ENSMUSG00000033510	protein_coding	utr	chr7-63758732-63759028	chr7-63815329-63817412	56300
chr9-52013765-52014578	2.77024e-08	0.254016	0.085	0.01	0.00560456	ENSMUST00000163153	Rdx	ENSMUSG00000032050	protein_coding	exon	chr9-52047150-52047235	chr9-52013765-52014578	32571
chr10-30731372-30731859	2.77582e-08	0.265344	0.078	0.009	0.00561585	ENSMUST00000068567	Ncoa7	ENSMUSG00000039697	protein_coding	gap	chr10-30722867-30771719	chr10-30731372-30731859	0
chr12-79864032-79865441	2.77943e-08	0.280999	0.155	0.044	0.00562316	ENSMUST00000021552	Zfp36l1	ENSMUSG00000021127	protein_coding	utr	chr12-80107760-80109588	chr12-79864032-79865441	242318
chr1-87900695-87901753	2.77985e-08	0.289748	0.196	0.068	0.005624	ENSMUST00000190243	Dgkd	ENSMUSG00000070738	protein_coding	gap	chr1-87881940-87915099	chr1-87900695-87901753	0
chr11-105943214-105945014	2.79321e-08	0.27624	0.408	0.208	0.00565103	ENSMUST00000184269	Cyb561	ENSMUSG00000019590	protein_coding	cds	chr11-105944111-105944203	chr11-105943214-105945014	0
chr15-93518136-93519994	2.79842e-08	0.273061	0.315	0.155	0.00566157	ENSMUST00000109255	Prickle1	ENSMUSG00000036158	protein_coding	utr	chr15-93519264-93519523	chr15-93518136-93519994	0
chr12-112866514-112867569	2.83139e-08	0.247808	0.119	0.039	0.00572827	ENSMUST00000021729	Gpr132	ENSMUSG00000021298	protein_coding	exon	chr12-112860870-112860916	chr12-112866514-112867569	5597
chr5-135522217-135522860	2.83914e-08	0.228402	0.062	0.007	0.00574395	ENSMUST00000060311	Hip1	ENSMUSG00000039959	protein_coding	gap	chr5-135460471-135544936	chr5-135522217-135522860	0
chr19-9071254-9071871	2.84106e-08	0.283646	0.145	0.055	0.00574784	ENSMUST00000092955	Ahnak	ENSMUSG00000069833	protein_coding	gap	chr19-9037259-9076575	chr19-9071254-9071871	0
chr8-117420892-117421165	2.87325e-08	0.28148	0.101	0.026	0.00581296	ENSMUST00000166750	Cmip	ENSMUSG00000034390	protein_coding	gap	chr8-117416257-117422844	chr8-117420892-117421165	0
chr7-93093375-93094086	2.88104e-08	0.268013	0.132	0.038	0.00582872	ENSMUST00000181886	Gm26862	ENSMUSG00000097644	lincRNA	gap	chr7-93048177-93103045	chr7-93093375-93094086	0
chr4-154926976-154929747	2.90321e-08	0.274359	0.209	0.093	0.00587357	ENSMUST00000152687	Tnfrsf14	ENSMUSG00000042333	protein_coding	cds	chr4-154927978-154928029	chr4-154926976-154929747	0
chr14-76721309-76722403	2.90807e-08	0.265022	0.109	0.025	0.0058834	ENSMUST00000189375	1700108F19Rik	ENSMUSG00000101009	processed_transcript	exon	chr14-76686728-76687169	chr14-76721309-76722403	34139
chr7-71704907-71706039	2.96612e-08	0.279334	0.212	0.087	0.00600085	ENSMUST00000190004	Gm29295	ENSMUSG00000099558	lincRNA	exon	chr7-71390486-71391272	chr7-71704907-71706039	313634
chr17-73067052-73067709	2.98969e-08	0.279206	0.116	0.035	0.00604854	ENSMUST00000130574	Lclat1	ENSMUSG00000054469	protein_coding	exon	chr17-73107985-73108145	chr17-73067052-73067709	40275
chr10-3717737-3718718	3.02453e-08	0.252342	0.256	0.132	0.00611902	ENSMUST00000120274	Plekhg1	ENSMUSG00000040624	protein_coding	exon	chr10-3740364-3740540	chr10-3717737-3718718	21645
chr5-111465853-111466436	3.03777e-08	0.278748	0.168	0.06	0.0061458	ENSMUST00000094463	Mn1	ENSMUSG00000070576	protein_coding	utr	chr5-111454792-111457033	chr5-111465853-111466436	8819
chr17-37196714-37197595	3.03994e-08	0.23002	0.059	0.004	0.00615019	ENSMUST00000055324	Olfr94	ENSMUSG00000043827	protein_coding	cds	chr17-37196806-37197966	chr17-37196714-37197595	0
chr3-52937617-52938754	3.06158e-08	0.270023	0.279	0.125	0.00619398	ENSMUST00000194274	RP24-297E7.1	ENSMUSG00000104401	lincRNA	exon	chr3-52927623-52927666	chr3-52937617-52938754	9950
chr7-19841450-19841964	3.06946e-08	0.225245	0.057	0.006	0.00620992	ENSMUST00000172815	Gm19345	ENSMUSG00000092216	protein_coding	exon	chr7-19852003-19852200	chr7-19841450-19841964	10038
chr10-83857699-83858323	3.07492e-08	0.256765	0.075	0.013	0.00622096	ENSMUST00000150459	1500009L16Rik	ENSMUSG00000087651	protein_coding	utr	chr10-83761918-83762761	chr10-83857699-83858323	94937
chr6-86584407-86585681	3.10033e-08	0.253522	0.354	0.186	0.00627238	ENSMUST00000181928	1600020E01Rik	ENSMUSG00000097048	lincRNA	exon	chr6-86564276-86564442	chr6-86584407-86585681	19964
chr17-35860785-35861909	3.12947e-08	0.278079	0.287	0.141	0.00633133	ENSMUST00000174873	Nrm	ENSMUSG00000059791	protein_coding	cds	chr17-35861385-35861517	chr17-35860785-35861909	0
chr2-71751282-71752189	3.17466e-08	0.235235	0.085	0.017	0.00642275	ENSMUST00000157059	Gm13662	ENSMUSG00000084794	processed_transcript	gap	chr2-71750048-71759212	chr2-71751282-71752189	0
chr18-38143906-38146030	3.18085e-08	0.259756	0.385	0.196	0.00643527	ENSMUST00000160721	Pcdh1	ENSMUSG00000051375	protein_coding	utr	chr18-38185914-38189942	chr18-38143906-38146030	39883
chr7-19830416-19832490	3.21521e-08	0.269078	0.295	0.144	0.0065048	ENSMUST00000120537	Bcl3	ENSMUSG00000053175	protein_coding	exon	chr7-19822437-19822770	chr7-19830416-19832490	7645
chr11-76080316-76080561	3.2385e-08	0.258027	0.078	0.013	0.00655191	ENSMUST00000169734	Vps53	ENSMUSG00000017288	protein_coding	gap	chr11-76077123-76081146	chr11-76080316-76080561	0
chr4-41123617-41124836	3.24732e-08	0.282609	0.318	0.171	0.00656975	ENSMUST00000030138	Nol6	ENSMUSG00000028430	protein_coding	cds	chr4-41124159-41124245	chr4-41123617-41124836	0
chr2-93028963-93029725	3.26761e-08	0.279615	0.134	0.038	0.00661081	ENSMUST00000178666	Prdm11	ENSMUSG00000075028	protein_coding	gap	chr2-93013890-93045978	chr2-93028963-93029725	0
chr14-20765463-20766309	3.26863e-08	0.288129	0.233	0.096	0.00661286	ENSMUST00000100837	Camk2g	ENSMUSG00000021820	protein_coding	cds	chr14-20766153-20766225	chr14-20765463-20766309	0
chr11-101668234-101669186	3.2785e-08	0.305948	0.199	0.071	0.00663284	ENSMUST00000039388	Arl4d	ENSMUSG00000034936	protein_coding	utr	chr11-101667256-101667832	chr11-101668234-101669186	401
chr7-90028771-90030994	3.28139e-08	0.271386	0.202	0.077	0.00663867	ENSMUST00000181784	Gm26529	ENSMUSG00000097585	protein_coding	utr	chr7-89981250-89981848	chr7-90028771-90030994	46922
chr6-117778255-117778851	3.30139e-08	0.281626	0.134	0.039	0.00667914	ENSMUST00000187642	1700030F04Rik	ENSMUSG00000099869	lincRNA	exon	chr6-117751676-117751769	chr6-117778255-117778851	26485
chr3-57543961-57544577	3.3157e-08	0.271251	0.171	0.062	0.00670809	ENSMUST00000120977	Wwtr1	ENSMUSG00000027803	protein_coding	gap	chr3-57501869-57574822	chr3-57543961-57544577	0
chr13-63324914-63325690	3.34946e-08	0.251542	0.093	0.017	0.0067764	ENSMUST00000163091	Fancc	ENSMUSG00000021461	protein_coding	cds	chr13-63325551-63325626	chr13-63324914-63325690	0
chr9-84135046-84135329	3.35704e-08	0.219856	0.054	0.004	0.00679173	ENSMUST00000190166	Bckdhb	ENSMUSG00000032263	protein_coding	utr	chr9-84123969-84124240	chr9-84135046-84135329	10805
chr11-51915205-51916944	3.38418e-08	0.243686	0.512	0.313	0.00684664	ENSMUST00000181262	Gm26551	ENSMUSG00000097219	lincRNA	exon	chr11-51949882-51949916	chr11-51915205-51916944	32937
chr16-55550710-55551349	3.39607e-08	0.281977	0.114	0.032	0.0068707	ENSMUST00000143914	Zpld1	ENSMUSG00000064310	protein_coding	exon	chr16-55297925-55297986	chr16-55550710-55551349	252723
chr2-71643693-71644565	3.41377e-08	0.267771	0.354	0.165	0.00690649	ENSMUST00000079720	Gm1631	ENSMUSG00000064263	lincRNA	exon	chr2-71719417-71719508	chr2-71643693-71644565	74851
chr5-107997694-107998161	3.42725e-08	0.261528	0.088	0.007	0.00693377	ENSMUST00000031198	Fam69a	ENSMUSG00000029270	protein_coding	exon	chr5-107986949-107987085	chr5-107997694-107998161	10608
chr2-117838246-117838884	3.44324e-08	0.281224	0.202	0.067	0.00696612	ENSMUST00000149239	4930412B13Rik	ENSMUSG00000086221	lincRNA	gap	chr2-117824859-117877826	chr2-117838246-117838884	0
chr5-100566866-100567549	3.4486e-08	0.286065	0.142	0.042	0.00697697	ENSMUST00000144595	Plac8	ENSMUSG00000029322	protein_coding	gap	chr5-100562763-100572144	chr5-100566866-100567549	0
chr6-125529532-125529855	3.47319e-08	0.281955	0.163	0.058	0.00702671	ENSMUST00000100941	Vwf	ENSMUSG00000001930	protein_coding	exon	chr6-125546774-125546819	chr6-125529532-125529855	16918
chr4-135282721-135283335	3.48529e-08	0.296927	0.124	0.035	0.00705119	ENSMUST00000037099	Clic4	ENSMUSG00000037242	protein_coding	exon	chr4-135272518-135272814	chr4-135282721-135283335	9906
chr12-86686506-86688233	3.5191e-08	0.260522	0.106	0.025	0.0071196	ENSMUST00000021681	Vash1	ENSMUSG00000021256	protein_coding	cds	chr12-86688212-86688286	chr12-86686506-86688233	0
chr7-143648979-143650162	3.53061e-08	0.269962	0.16	0.061	0.00714289	ENSMUST00000146692	Tnfrsf22	ENSMUSG00000010751	protein_coding	cds	chr7-143649527-143649631	chr7-143648979-143650162	0
chr2-120566991-120568118	3.57285e-08	0.268937	0.315	0.151	0.00722833	ENSMUST00000153580	Snap23	ENSMUSG00000027287	protein_coding	utr	chr2-120567723-120567806	chr2-120566991-120568118	0
chr8-117362034-117362724	3.5794e-08	0.244873	0.078	0.013	0.0072416	ENSMUST00000166750	Cmip	ENSMUSG00000034390	protein_coding	gap	chr8-117257402-117377074	chr8-117362034-117362724	0
chr13-5591754-5592950	3.5866e-08	0.290129	0.183	0.071	0.00725617	ENSMUST00000186843	1700016G22Rik	ENSMUSG00000100625	lincRNA	exon	chr13-5855508-5855951	chr13-5591754-5592950	262557
chr14-75863495-75864241	3.63238e-08	0.272533	0.233	0.099	0.00734878	ENSMUST00000142061	Tpt1	ENSMUSG00000060126	protein_coding	utr	chr14-75848102-75848525	chr14-75863495-75864241	14969
chr9-122027074-122028138	3.65437e-08	0.302339	0.181	0.058	0.00739326	ENSMUST00000084743	Pomgnt2	ENSMUSG00000066235	protein_coding	exon	chr9-121995876-121996026	chr9-122027074-122028138	31047
chr18-68589913-68591176	3.69919e-08	0.26633	0.202	0.077	0.00748394	ENSMUST00000052347	Mc2r	ENSMUSG00000045569	protein_coding	exon	chr18-68429212-68429251	chr18-68589913-68591176	160661
chr8-84978519-84978929	3.7215e-08	0.266564	0.419	0.222	0.00752907	ENSMUST00000064922	Junb	ENSMUSG00000052837	protein_coding	utr	chr8-84978430-84978748	chr8-84978519-84978929	0
chr7-145110368-145112787	3.72772e-08	0.278476	0.313	0.157	0.00754167	ENSMUST00000058022	Tpcn2	ENSMUSG00000048677	protein_coding	utr	chr7-145253923-145254619	chr7-145110368-145112787	141135
chr17-12915293-12917116	3.72936e-08	0.26191	0.447	0.247	0.00754498	ENSMUST00000151287	Tcp1	ENSMUSG00000068039	protein_coding	cds	chr17-12916566-12916629	chr17-12915293-12917116	0
chr3-27269799-27270892	3.75337e-08	0.262964	0.256	0.11	0.00759356	ENSMUST00000091284	Nceh1	ENSMUSG00000027698	protein_coding	gap	chr3-27226143-27279193	chr3-27269799-27270892	0
chr2-131950503-131951049	3.81301e-08	0.243028	0.075	0.01	0.00771422	ENSMUST00000110172	Prnd	ENSMUSG00000027338	protein_coding	utr	chr2-131950862-131950915	chr2-131950503-131951049	0
chr11-53818689-53819230	3.8306e-08	0.258019	0.202	0.084	0.00774979	ENSMUST00000135815	Gm12216	ENSMUSG00000081769	protein_coding	gap	chr11-53813617-53850004	chr11-53818689-53819230	0
chr7-97417336-97417733	3.87501e-08	0.26813	0.085	0.015	0.00783966	ENSMUST00000043077	Thrsp	ENSMUSG00000035686	protein_coding	cds	chr7-97417051-97417503	chr7-97417336-97417733	0
chr9-122107760-122108326	3.89199e-08	0.27442	0.132	0.038	0.007874	ENSMUST00000146832	Snrk	ENSMUSG00000038145	protein_coding	exon	chr9-122117283-122117407	chr9-122107760-122108326	8956
chr8-126838617-126840207	3.9095e-08	0.270285	0.245	0.096	0.00790943	ENSMUST00000179857	Tomm20	ENSMUSG00000093904	protein_coding	utr	chr8-126930664-126935014	chr8-126838617-126840207	90456
chr18-75464689-75465714	4.00444e-08	0.277979	0.191	0.075	0.00810151	ENSMUST00000165559	Ctif	ENSMUSG00000052928	protein_coding	gap	chr18-75437225-75471864	chr18-75464689-75465714	0
chr15-99865593-99866790	4.03733e-08	0.266703	0.173	0.071	0.00816805	ENSMUST00000171450	Lima1	ENSMUSG00000023022	protein_coding	gap	chr15-99843824-99875332	chr15-99865593-99866790	0
chr9-120000989-120002605	4.05565e-08	0.273591	0.307	0.144	0.0082051	ENSMUST00000177637	Cx3cr1	ENSMUSG00000052336	protein_coding	gap	chr9-119901628-120049278	chr9-120000989-120002605	0
chr12-105557112-105557534	4.05711e-08	0.267676	0.16	0.054	0.00820806	ENSMUST00000001652	Bdkrb2	ENSMUSG00000021070	protein_coding	exon	chr12-105563172-105563248	chr12-105557112-105557534	5637
chr9-63982838-63983839	4.06305e-08	0.272391	0.127	0.033	0.00822007	ENSMUST00000144323	Smad6	ENSMUSG00000036867	protein_coding	gap	chr9-63954057-63989471	chr9-63982838-63983839	0
chr1-40174090-40174492	4.1084e-08	0.22024	0.067	0.006	0.00831183	ENSMUST00000027243	Il1r2	ENSMUSG00000026073	protein_coding	utr	chr1-40125208-40125231	chr1-40174090-40174492	48858
chr1-177623178-177623988	4.16253e-08	0.288952	0.116	0.03	0.00842135	ENSMUST00000189507	2310043L19Rik	ENSMUSG00000101746	lincRNA	exon	chr1-177641542-177641897	chr1-177623178-177623988	17553
chr17-67304670-67305291	4.19835e-08	0.232969	0.067	0.007	0.00849382	ENSMUST00000037974	Ptprm	ENSMUSG00000033278	protein_coding	gap	chr17-67191372-67353956	chr17-67304670-67305291	0
chr8-46781140-46781367	4.20861e-08	0.246324	0.08	0.015	0.00851457	ENSMUST00000034041	Irf2	ENSMUSG00000031627	protein_coding	gap	chr8-46739937-46793492	chr8-46781140-46781367	0
chr16-97356194-97357857	4.23557e-08	0.296534	0.183	0.06	0.00856911	ENSMUST00000047275	Bace2	ENSMUSG00000040605	protein_coding	cds	chr16-97356802-97357101	chr16-97356194-97357857	0
chr3-68493080-68495674	4.24827e-08	0.26156	0.432	0.215	0.00859479	ENSMUST00000192555	Schip1	ENSMUSG00000027777	protein_coding	cds	chr3-68494592-68495257	chr3-68493080-68495674	0
chr19-43564175-43564507	4.28278e-08	0.264597	0.09	0.015	0.00866462	ENSMUST00000026196	Got1	ENSMUSG00000025190	protein_coding	exon	chr19-43524338-43524605	chr19-43564175-43564507	39569
chr4-131916343-131916733	4.30278e-08	0.287614	0.121	0.038	0.00870509	ENSMUST00000124738	Gm12992	ENSMUSG00000085667	processed_transcript	gap	chr4-131915522-131919767	chr4-131916343-131916733	0
chr1-106076876-106077570	4.3295e-08	0.269099	0.106	0.029	0.00875914	ENSMUST00000118196	Zcchc2	ENSMUSG00000038866	protein_coding	utr	chr1-106032164-106034074	chr1-106076876-106077570	42801
chr6-146432283-146433291	4.34355e-08	0.240771	0.103	0.026	0.00878756	ENSMUST00000145418	Itpr2	ENSMUSG00000030287	protein_coding	gap	chr6-146426571-146476686	chr6-146432283-146433291	0
chr17-5983206-5984203	4.36489e-08	0.232466	0.096	0.015	0.00883074	ENSMUST00000146009	Synj2	ENSMUSG00000023805	protein_coding	gap	chr17-5975882-5985971	chr17-5983206-5984203	0
chr7-98543947-98544274	4.36928e-08	0.236636	0.075	0.01	0.00883961	ENSMUST00000069035	A630091E08Rik	ENSMUSG00000055446	protein_coding	cds	chr7-98543597-98543999	chr7-98543947-98544274	0
chr6-120114512-120115044	4.41395e-08	0.276698	0.183	0.058	0.00893	ENSMUST00000112711	Ninj2	ENSMUSG00000041377	protein_coding	gap	chr6-120093459-120197902	chr6-120114512-120115044	0
chr18-60666950-60667256	4.41674e-08	0.237323	0.067	0.01	0.00893564	ENSMUST00000137894	Synpo	ENSMUSG00000043079	protein_coding	exon	chr18-60660102-60660142	chr18-60666950-60667256	6807
chr17-28515664-28516381	4.43447e-08	0.280244	0.212	0.086	0.0089715	ENSMUST00000177939	Fkbp5	ENSMUSG00000024222	protein_coding	gap	chr17-28507470-28517394	chr17-28515664-28516381	0
chr11-101820922-101821166	4.43541e-08	0.248957	0.093	0.019	0.00897342	ENSMUST00000017868	Etv4	ENSMUSG00000017724	protein_coding	exon	chr11-101785108-101785371	chr11-101820922-101821166	35550
chr15-101318643-101319800	4.47362e-08	0.257896	0.098	0.023	0.00905072	ENSMUST00000191426	6030408B16Rik	ENSMUSG00000075408	lincRNA	exon	chr15-101295881-101297426	chr15-101318643-101319800	21216
chr12-53983894-53984167	4.50175e-08	0.239336	0.054	0.003	0.00910763	ENSMUST00000101432	Npas3	ENSMUSG00000021010	protein_coding	gap	chr12-53947338-54003452	chr12-53983894-53984167	0
chr8-106717714-106718531	4.50911e-08	0.275892	0.165	0.054	0.00912251	ENSMUST00000048359	Tango6	ENSMUSG00000041949	protein_coding	cds	chr8-106717970-106718146	chr8-106717714-106718531	0
chr15-86169733-86170049	4.5232e-08	0.272477	0.152	0.062	0.00915103	ENSMUST00000044332	Cerk	ENSMUSG00000035891	protein_coding	gap	chr15-86165936-86185506	chr15-86169733-86170049	0
chr7-71370715-71370991	4.52759e-08	0.237083	0.072	0.01	0.0091599	ENSMUST00000190004	Gm29295	ENSMUSG00000099558	lincRNA	gap	chr7-71351726-71382889	chr7-71370715-71370991	0
chr9-62381314-62381632	4.53657e-08	0.282424	0.14	0.048	0.00917807	ENSMUST00000085519	Anp32a	ENSMUSG00000032249	protein_coding	utr	chr9-62377616-62378812	chr9-62381314-62381632	2501
chr1-40139304-40140520	4.55617e-08	0.285663	0.109	0.016	0.00921773	ENSMUST00000027243	Il1r2	ENSMUSG00000026073	protein_coding	utr	chr1-40125208-40125231	chr1-40139304-40140520	14072
chr12-73671374-73671852	4.56495e-08	0.261355	0.111	0.035	0.00923549	ENSMUST00000119092	Prkch	ENSMUSG00000021108	protein_coding	gap	chr12-73649356-73691547	chr12-73671374-73671852	0
chr5-149526256-149527031	4.5775e-08	0.262679	0.207	0.091	0.00926087	ENSMUST00000156774	Gm15997	ENSMUSG00000086744	processed_transcript	gap	chr5-149503706-149537912	chr5-149526256-149527031	0
chr11-105952898-105953769	4.58155e-08	0.260078	0.129	0.039	0.00926906	ENSMUST00000143251	Cyb561	ENSMUSG00000019590	protein_coding	cds	chr11-105953047-105953147	chr11-105952898-105953769	0
chr11-69364898-69365243	4.5894e-08	0.298582	0.202	0.075	0.00928495	ENSMUST00000166700	Gm17305	ENSMUSG00000091095	protein_coding	gap	chr11-69364821-69368546	chr11-69364898-69365243	0
chr1-152176469-152177682	4.62833e-08	0.237493	0.067	0.012	0.00936372	ENSMUST00000044581	1700025G04Rik	ENSMUSG00000032666	protein_coding	exon	chr1-152089932-152090125	chr1-152176469-152177682	86343
chr3-89256261-89256480	4.63079e-08	0.271975	0.088	0.016	0.00936869	ENSMUST00000107462	Dpm3	ENSMUSG00000042737	protein_coding	exon	chr3-89259358-89259591	chr3-89256261-89256480	2877
chr14-63409000-63409461	4.64154e-08	0.253776	0.088	0.016	0.00939044	ENSMUST00000014597	Blk	ENSMUSG00000014453	protein_coding	gap	chr14-63387828-63416768	chr14-63409000-63409461	0
chr15-36371336-36371682	4.6593e-08	0.25664	0.072	0.007	0.00942636	ENSMUST00000090170	Rpl7a-ps3	ENSMUSG00000068579	protein_coding	exon	chr15-36308144-36308956	chr15-36371336-36371682	62379
chr8-117197743-117198653	4.67902e-08	0.269337	0.207	0.087	0.00946627	ENSMUST00000162997	Gan	ENSMUSG00000052557	protein_coding	gap	chr8-117196581-117203949	chr8-117197743-117198653	0
chr2-152726682-152727330	4.70546e-08	0.286659	0.15	0.042	0.00951976	ENSMUST00000038368	Id1	ENSMUSG00000042745	protein_coding	exon	chr2-152736251-152736745	chr2-152726682-152727330	8920
chr10-94072376-94073342	4.75507e-08	0.253591	0.137	0.041	0.00962012	ENSMUST00000141143	Fgd6	ENSMUSG00000020021	protein_coding	gap	chr10-94072622-94074182	chr10-94072376-94073342	0
chr2-163595919-163596707	4.75614e-08	0.278503	0.189	0.06	0.00962229	ENSMUST00000171696	Ttpal	ENSMUSG00000017679	protein_coding	exon	chr2-163602314-163602414	chr2-163595919-163596707	5606
chr17-34437161-34438847	4.79043e-08	0.24084	0.088	0.023	0.00969166	ENSMUST00000142317	BC051142	ENSMUSG00000057246	protein_coding	cds	chr17-34437700-34437720	chr17-34437161-34438847	0
chr8-105504611-105505050	4.79345e-08	0.256195	0.109	0.032	0.00969777	ENSMUST00000034363	Hsd11b2	ENSMUSG00000031891	protein_coding	exon	chr8-105518746-105519129	chr8-105504611-105505050	13695
chr6-135362185-135363197	4.84211e-08	0.28621	0.235	0.094	0.00979621	ENSMUST00000154270	Emp1	ENSMUSG00000030208	protein_coding	utr	chr6-135362931-135363102	chr6-135362185-135363197	0
chr6-108875427-108876371	4.87567e-08	0.257699	0.14	0.044	0.00986412	ENSMUST00000089162	Edem1	ENSMUSG00000030104	protein_coding	utr	chr6-108855557-108859356	chr6-108875427-108876371	16070
chr15-98675936-98677800	4.92603e-08	0.269068	0.295	0.131	0.00996601	ENSMUST00000120997	Rnd1	ENSMUSG00000054855	protein_coding	cds	chr15-98677230-98677349	chr15-98675936-98677800	0
chr3-30344189-30344443	4.9595e-08	0.23066	0.057	0.006	0.0100337	ENSMUST00000173899	Mecom	ENSMUSG00000027684	protein_coding	gap	chr3-30238322-30509429	chr3-30344189-30344443	0
chr13-99152267-99152847	5.00763e-08	0.232438	0.059	0.004	0.0101311	ENSMUST00000056558	Zfp366	ENSMUSG00000050919	protein_coding	exon	chr13-99184823-99184864	chr13-99152267-99152847	31975
chr14-65900121-65900998	5.01573e-08	0.247372	0.075	0.006	0.0101475	ENSMUST00000042046	Scara3	ENSMUSG00000034463	protein_coding	utr	chr14-65919395-65920736	chr14-65900121-65900998	18396
chr3-149348601-149349734	5.02381e-08	0.273058	0.302	0.145	0.0101638	ENSMUST00000180599	Gm10287	ENSMUSG00000070342	lincRNA	exon	chr3-149221687-149225745	chr3-149348601-149349734	122855
chr8-22491253-22491793	5.03073e-08	0.256669	0.101	0.019	0.0101778	ENSMUST00000067786	Slc20a2	ENSMUSG00000037656	protein_coding	gap	chr8-22476926-22535018	chr8-22491253-22491793	0
chr2-59400813-59401360	5.03321e-08	0.274109	0.181	0.06	0.0101828	ENSMUST00000155111	5330411J11Rik	ENSMUSG00000087455	processed_transcript	exon	chr2-59387294-59387471	chr2-59400813-59401360	13341
chr13-45721685-45721930	5.04946e-08	0.244745	0.08	0.01	0.0102157	ENSMUST00000180110	Atxn1	ENSMUSG00000046876	protein_coding	gap	chr13-45697946-45735114	chr13-45721685-45721930	0
chr1-166308693-166309685	5.08881e-08	0.213619	0.057	0.006	0.0102953	ENSMUST00000194964	Ildr2	ENSMUSG00000040612	protein_coding	cds	chr1-166308847-166309543	chr1-166308693-166309685	0
chr5-31570554-31571993	5.14901e-08	0.258183	0.207	0.078	0.0104171	ENSMUST00000117262	Slc4a1ap	ENSMUSG00000029141	protein_coding	utr	chr5-31553789-31554042	chr5-31570554-31571993	16511
chr3-89359569-89360584	5.16505e-08	0.268322	0.096	0.02	0.0104496	ENSMUST00000128002	Dcst1	ENSMUSG00000042672	protein_coding	gap	chr3-89359204-89364048	chr3-89359569-89360584	0
chr4-118030949-118031674	5.20416e-08	0.255636	0.129	0.036	0.0105287	ENSMUST00000138274	St3gal3	ENSMUSG00000028538	protein_coding	gap	chr4-118014798-118031839	chr4-118030949-118031674	0
chr19-46303837-46306062	5.21508e-08	0.236497	0.496	0.28	0.0105508	ENSMUST00000111881	Nfkb2	ENSMUSG00000025225	protein_coding	cds	chr19-46306004-46306024	chr19-46303837-46306062	0
chr12-108534533-108534802	5.24849e-08	0.254848	0.096	0.02	0.0106184	ENSMUST00000130999	Eml1	ENSMUSG00000058070	protein_coding	cds	chr12-108534654-108534740	chr12-108534533-108534802	0
chr8-45719819-45720196	5.26789e-08	0.283276	0.132	0.035	0.0106576	ENSMUST00000171337	Sorbs2	ENSMUSG00000031626	protein_coding	gap	chr8-45658942-45736152	chr8-45719819-45720196	0
chr2-125788291-125788655	5.27482e-08	0.204743	0.054	0.004	0.0106716	ENSMUST00000053699	Secisbp2l	ENSMUSG00000035093	protein_coding	exon	chr2-125782599-125782870	chr2-125788291-125788655	5420
chr5-23251571-23252211	5.29474e-08	0.279883	0.214	0.078	0.0107119	ENSMUST00000185943	5031425E22Rik	ENSMUSG00000073147	lincRNA	exon	chr5-23382308-23382529	chr5-23251571-23252211	130096
chr7-28380951-28381429	5.35108e-08	0.240637	0.406	0.213	0.0108259	ENSMUST00000051241	Zfp36	ENSMUSG00000044786	protein_coding	exon	chr7-28379174-28379255	chr7-28380951-28381429	1695
chr5-105620366-105620827	5.41052e-08	0.271758	0.147	0.054	0.0109462	ENSMUST00000067924	Lrrc8c	ENSMUSG00000054720	protein_coding	utr	chr5-105608773-105613018	chr5-105620366-105620827	7347
chr9-32789256-32789637	5.41166e-08	0.273301	0.14	0.041	0.0109485	ENSMUST00000183423	Gm3331	ENSMUSG00000099148	lincRNA	exon	chr9-32813734-32813859	chr9-32789256-32789637	24096
chr18-32146989-32147904	5.4607e-08	0.256119	0.16	0.06	0.0110477	ENSMUST00000181713	Gm26717	ENSMUSG00000097363	lincRNA	exon	chr18-32153476-32153595	chr18-32146989-32147904	5571
chr7-135699271-135699620	5.5162e-08	0.256363	0.08	0.012	0.01116	ENSMUST00000033310	Mki67	ENSMUSG00000031004	protein_coding	cds	chr7-135694232-135701067	chr7-135699271-135699620	0
chr10-120384769-120385188	5.56601e-08	0.262279	0.088	0.015	0.0112608	ENSMUST00000159699	Hmga2	ENSMUSG00000056758	protein_coding	gap	chr10-120374701-120462663	chr10-120384769-120385188	0
chr4-138407526-138408201	5.61803e-08	0.270335	0.111	0.02	0.011366	ENSMUST00000062902	AB041806	ENSMUSG00000046109	protein_coding	utr	chr4-138396135-138397714	chr4-138407526-138408201	9811
chr5-63951354-63951922	5.62149e-08	0.256372	0.132	0.036	0.011373	ENSMUST00000154169	Rell1	ENSMUSG00000047881	protein_coding	gap	chr5-63938034-63968645	chr5-63951354-63951922	0
chr19-47536406-47538261	5.63961e-08	0.262875	0.354	0.174	0.0114097	ENSMUST00000182808	Obfc1	ENSMUSG00000042694	protein_coding	utr	chr19-47536814-47537036	chr19-47536406-47538261	0
chr9-120027386-120028247	5.65015e-08	0.254396	0.111	0.028	0.011431	ENSMUST00000177637	Cx3cr1	ENSMUSG00000052336	protein_coding	gap	chr9-119901628-120049278	chr9-120027386-120028247	0
chr5-43554823-43555657	5.65603e-08	0.24344	0.075	0.012	0.0114429	ENSMUST00000167522	C1qtnf7	ENSMUSG00000061535	protein_coding	gap	chr5-43515987-43609052	chr5-43554823-43555657	0
chr9-44904855-44905345	5.69146e-08	0.247663	0.09	0.016	0.0115146	ENSMUST00000043675	Atp5l	ENSMUSG00000038717	protein_coding	utr	chr9-44913250-44913367	chr9-44904855-44905345	7904
chr11-117557275-117558352	5.76146e-08	0.272969	0.217	0.073	0.0116562	ENSMUST00000132261	Gm11734	ENSMUSG00000085419	lincRNA	exon	chr11-117532084-117532205	chr11-117557275-117558352	25069
chr16-97845079-97846042	5.85663e-08	0.271419	0.121	0.038	0.0118487	ENSMUST00000142295	Prdm15	ENSMUSG00000014039	protein_coding	gap	chr16-97839969-97851768	chr16-97845079-97846042	0
chr5-142424395-142425426	5.85982e-08	0.280801	0.297	0.147	0.0118552	ENSMUST00000072837	Foxk1	ENSMUSG00000056493	protein_coding	gap	chr5-142402042-142435140	chr5-142424395-142425426	0
chr1-90423990-90424381	5.861e-08	0.228909	0.085	0.017	0.0118576	ENSMUST00000187630	Gm28722	ENSMUSG00000101997	lincRNA	exon	chr1-90453394-90454264	chr1-90423990-90424381	29012
chr1-184748508-184749157	5.87351e-08	0.291236	0.23	0.094	0.0118829	ENSMUST00000192139	RP23-433P9.4	ENSMUSG00000102158	lincRNA	exon	chr1-184739240-184739520	chr1-184748508-184749157	8987
chr16-31276345-31276945	5.9147e-08	0.274561	0.269	0.132	0.0119662	ENSMUST00000060188	Ppp1r2	ENSMUSG00000047714	protein_coding	exon	chr16-31274846-31275277	chr16-31276345-31276945	1067
chr7-127477345-127479324	5.93268e-08	0.225008	0.646	0.398	0.0120026	ENSMUST00000106292	Prr14	ENSMUSG00000030822	protein_coding	utr	chr7-127476661-127476759	chr7-127477345-127479324	585
chr15-6564965-6565468	5.94495e-08	0.241546	0.083	0.015	0.0120274	ENSMUST00000090461	Fyb	ENSMUSG00000022148	protein_coding	exon	chr15-6579871-6581046	chr15-6564965-6565468	14402
chr14-61452494-61452819	5.97288e-08	0.233995	0.075	0.013	0.0120839	ENSMUST00000022496	Kpna3	ENSMUSG00000021929	protein_coding	exon	chr14-61439723-61439947	chr14-61452494-61452819	12546
chr8-120948122-120949681	5.99573e-08	0.253801	0.103	0.03	0.0121301	ENSMUST00000127664	Gm20388	ENSMUSG00000092329	protein_coding	gap	chr8-119910940-124295357	chr8-120948122-120949681	0
chr3-115641438-115643336	6.01109e-08	0.262689	0.287	0.135	0.0121612	ENSMUST00000055676	S1pr1	ENSMUSG00000045092	protein_coding	utr	chr3-115710433-115711794	chr3-115641438-115643336	67096
chr9-43673184-43673637	6.05579e-08	0.264284	0.088	0.01	0.0122516	ENSMUST00000034510	Pvrl1	ENSMUSG00000032012	protein_coding	exon	chr9-43744576-43744722	chr9-43673184-43673637	70938
chr11-117881655-117882191	6.11324e-08	0.28317	0.225	0.094	0.0123679	ENSMUST00000153989	Tha1	ENSMUSG00000017713	protein_coding	exon	chr11-117873171-117873481	chr11-117881655-117882191	8173
chr17-31943378-31944405	6.13894e-08	0.269408	0.132	0.036	0.0124199	ENSMUST00000002145	Hsf2bp	ENSMUSG00000002076	protein_coding	utr	chr17-31944769-31946602	chr17-31943378-31944405	363
chr6-86772220-86773108	6.14132e-08	0.258278	0.114	0.032	0.0124247	ENSMUST00000001187	Anxa4	ENSMUSG00000029994	protein_coding	gap	chr6-86765808-86793508	chr6-86772220-86773108	0
chr4-115052459-115052959	6.15418e-08	0.282283	0.24	0.091	0.0124507	ENSMUST00000030489	Tal1	ENSMUSG00000028717	protein_coding	exon	chr4-115056426-115056469	chr4-115052459-115052959	3466
chr3-108084816-108086999	6.16087e-08	0.252989	0.315	0.16	0.0124642	ENSMUST00000102638	Ampd2	ENSMUSG00000027889	protein_coding	cds	chr3-108086218-108086227	chr3-108084816-108086999	0
chr10-83871601-83872130	6.1636e-08	0.267519	0.147	0.046	0.0124698	ENSMUST00000150459	1500009L16Rik	ENSMUSG00000087651	protein_coding	utr	chr10-83761918-83762761	chr10-83871601-83872130	108839
chr7-28593118-28594106	6.18277e-08	0.273858	0.171	0.055	0.0125086	ENSMUST00000150454	Pak4	ENSMUSG00000030602	protein_coding	gap	chr7-28569867-28598034	chr7-28593118-28594106	0
chr18-69415328-69416434	6.18686e-08	0.246259	0.253	0.116	0.0125168	ENSMUST00000155695	Tcf4	ENSMUSG00000053477	protein_coding	gap	chr18-69349145-69461861	chr18-69415328-69416434	0
chr9-32834294-32835881	6.18797e-08	0.233133	0.07	0.009	0.0125191	ENSMUST00000183423	Gm3331	ENSMUSG00000099148	lincRNA	exon	chr9-32833214-32834104	chr9-32834294-32835881	189
chr2-135561627-135562989	6.19254e-08	0.272319	0.295	0.142	0.0125283	ENSMUST00000146980	Gm14074	ENSMUSG00000084762	lincRNA	exon	chr2-135648907-135648971	chr2-135561627-135562989	85917
chr14-121825485-121826412	6.20902e-08	0.288874	0.163	0.045	0.0125617	ENSMUST00000100299	Dock9	ENSMUSG00000025558	protein_coding	exon	chr14-121797490-121797734	chr14-121825485-121826412	27750
chr6-116653871-116654663	6.31472e-08	0.287884	0.132	0.038	0.0127755	ENSMUST00000035842	Rassf4	ENSMUSG00000042129	protein_coding	gap	chr6-116647710-116659524	chr6-116653871-116654663	0
chr11-8208965-8209671	6.36519e-08	0.242666	0.075	0.012	0.0128776	ENSMUST00000020695	Tns3	ENSMUSG00000020422	protein_coding	utr	chr11-8431652-8434493	chr11-8208965-8209671	221980
chr1-90186181-90186526	6.52905e-08	0.21896	0.059	0.004	0.0132091	ENSMUST00000065587	Ackr3	ENSMUSG00000044337	protein_coding	exon	chr1-90203980-90204087	chr1-90186181-90186526	17453
chr5-136237579-136237967	6.58022e-08	0.228383	0.072	0.012	0.0133126	ENSMUST00000005188	Sh2b2	ENSMUSG00000005057	protein_coding	gap	chr5-136232387-136244628	chr5-136237579-136237967	0
chr5-33689225-33690203	6.67409e-08	0.283487	0.302	0.154	0.0135025	ENSMUST00000079534	Tacc3	ENSMUSG00000037313	protein_coding	utr	chr5-33678620-33678995	chr5-33689225-33690203	10229
chr10-24493293-24494250	6.68005e-08	0.281297	0.183	0.058	0.0135146	ENSMUST00000134627	Gm15271	ENSMUSG00000086148	lincRNA	exon	chr10-24451155-24452657	chr10-24493293-24494250	40635
chr4-127263321-127264160	6.69393e-08	0.269979	0.227	0.112	0.0135427	ENSMUST00000142029	Smim12	ENSMUSG00000042380	protein_coding	utr	chr4-127247187-127247809	chr4-127263321-127264160	15511
chr1-135844468-135844787	6.70274e-08	0.271063	0.119	0.03	0.0135605	ENSMUST00000190451	Tnnt2	ENSMUSG00000026414	protein_coding	gap	chr1-135841912-135845554	chr1-135844468-135844787	0
chr2-160901595-160901993	6.71122e-08	0.237688	0.083	0.013	0.0135777	ENSMUST00000109457	Lpin3	ENSMUSG00000027412	protein_coding	cds	chr2-160901833-160901876	chr2-160901595-160901993	0
chr8-120998909-120999306	6.71434e-08	0.257718	0.124	0.038	0.013584	ENSMUST00000127664	Gm20388	ENSMUSG00000092329	protein_coding	gap	chr8-119910940-124295357	chr8-120998909-120999306	0
chr10-21857578-21858009	6.72338e-08	0.280401	0.129	0.032	0.0136023	ENSMUST00000180731	Gm6846	ENSMUSG00000097107	lincRNA	exon	chr10-21844588-21844851	chr10-21857578-21858009	12726
chr1-177708520-177709096	6.75153e-08	0.26229	0.106	0.026	0.0136592	ENSMUST00000016106	1700016C15Rik	ENSMUSG00000015962	protein_coding	exon	chr1-177729814-177729961	chr1-177708520-177709096	20717
chr12-105000600-105001592	6.77479e-08	0.247132	0.163	0.052	0.0137063	ENSMUST00000067005	Syne3	ENSMUSG00000054150	protein_coding	gap	chr12-104975896-105009713	chr12-105000600-105001592	0
chr8-71528227-71529059	6.84434e-08	0.272132	0.207	0.078	0.013847	ENSMUST00000051672	Bst2	ENSMUSG00000046718	protein_coding	utr	chr8-71534264-71534480	chr8-71528227-71529059	5204
chr11-76045207-76045559	6.86651e-08	0.211208	0.054	0.006	0.0138919	ENSMUST00000056601	Vps53	ENSMUSG00000017288	protein_coding	utr	chr11-76046226-76046411	chr11-76045207-76045559	666
chr18-55095580-55096588	6.87805e-08	0.279075	0.23	0.102	0.0139152	ENSMUST00000181765	Gm4221	ENSMUSG00000096948	lincRNA	exon	chr18-55076479-55079414	chr18-55095580-55096588	16165
chr7-117090335-117091456	6.89822e-08	0.26209	0.119	0.03	0.013956	ENSMUST00000032892	Xylt1	ENSMUSG00000030657	protein_coding	exon	chr7-117380979-117381520	chr7-117090335-117091456	289522
chr4-129011348-129012247	6.90663e-08	0.246825	0.116	0.03	0.013973	ENSMUST00000102604	Ak2	ENSMUSG00000028792	protein_coding	utr	chr4-129010568-129011529	chr4-129011348-129012247	0
chr10-20486514-20487288	6.97825e-08	0.279247	0.194	0.07	0.0141179	ENSMUST00000170683	Pde7b	ENSMUSG00000019990	protein_coding	gap	chr10-20479759-20619129	chr10-20486514-20487288	0
chr16-87127878-87128740	7.03879e-08	0.28991	0.282	0.119	0.0142404	ENSMUST00000054442	N6amt1	ENSMUSG00000044442	protein_coding	exon	chr16-87354185-87354386	chr16-87127878-87128740	225444
chr17-35812746-35814069	7.04035e-08	0.263172	0.302	0.165	0.0142435	ENSMUST00000003635	Ier3	ENSMUSG00000003541	protein_coding	exon	chr17-35821684-35821928	chr17-35812746-35814069	7614
chr12-86836020-86836987	7.1298e-08	0.273778	0.354	0.181	0.0144245	ENSMUST00000038422	Irf2bpl	ENSMUSG00000034168	protein_coding	utr	chr12-86880703-86881569	chr12-86836020-86836987	43715
chr17-73786399-73787244	7.14037e-08	0.258945	0.119	0.038	0.0144459	ENSMUST00000024860	Ehd3	ENSMUSG00000024065	protein_coding	exon	chr17-73804841-73805469	chr17-73786399-73787244	17596
chr7-19783383-19783971	7.17904e-08	0.283342	0.158	0.062	0.0145241	ENSMUST00000148416	Cblc	ENSMUSG00000040525	protein_coding	gap	chr7-19781077-19784802	chr7-19783383-19783971	0
chr18-70622114-70622799	7.2319e-08	0.263313	0.121	0.041	0.0146311	ENSMUST00000074058	Mbd2	ENSMUSG00000024513	protein_coding	cds	chr18-70622583-70622709	chr18-70622114-70622799	0
chr12-102756902-102758821	7.27676e-08	0.263601	0.429	0.232	0.0147218	ENSMUST00000179306	Gm28051	ENSMUSG00000098530	protein_coding	cds	chr12-102757541-102757745	chr12-102756902-102758821	0
chr12-35291622-35292416	7.30308e-08	0.277262	0.111	0.022	0.0147751	ENSMUST00000048519	Snx13	ENSMUSG00000020590	protein_coding	utr	chr12-35144337-35147469	chr12-35291622-35292416	144152
chr14-97964666-97964883	7.31868e-08	0.2629	0.075	0.013	0.0148066	ENSMUST00000156684	Dach1	ENSMUSG00000055639	protein_coding	gap	chr14-97915970-97969806	chr14-97964666-97964883	0
chr19-5951940-5952664	7.33517e-08	0.261471	0.264	0.126	0.01484	ENSMUST00000165143	Pola2	ENSMUSG00000024833	protein_coding	gap	chr19-5951787-5953064	chr19-5951940-5952664	0
chr3-96159984-96162438	7.34663e-08	0.268089	0.212	0.091	0.0148632	ENSMUST00000129925	Mtmr11	ENSMUSG00000045934	protein_coding	cds	chr3-96162193-96162258	chr3-96159984-96162438	0
chr15-101262416-101262837	7.37496e-08	0.263725	0.15	0.052	0.0149205	ENSMUST00000023779	Nr4a1	ENSMUSG00000023034	protein_coding	exon	chr15-101266846-101266971	chr15-101262416-101262837	4008
chr17-15327215-15327912	7.40555e-08	0.222098	0.065	0.009	0.0149824	ENSMUST00000014917	Dll1	ENSMUSG00000014773	protein_coding	utr	chr17-15367354-15368029	chr17-15327215-15327912	39441
chr5-147747791-147748606	7.52332e-08	0.262827	0.119	0.033	0.0152207	ENSMUST00000031653	Flt1	ENSMUSG00000029648	protein_coding	exon	chr5-147725671-147726011	chr5-147747791-147748606	21779
chr10-99081529-99082060	7.54415e-08	0.220479	0.07	0.012	0.0152628	ENSMUST00000020113	Poc1b	ENSMUSG00000019952	protein_coding	exon	chr10-99107036-99107223	chr10-99081529-99082060	24975
chr11-95403585-95404111	7.54913e-08	0.250892	0.085	0.015	0.0152729	ENSMUST00000107724	Spop	ENSMUSG00000057522	protein_coding	exon	chr11-95414080-95414131	chr11-95403585-95404111	9968
chr16-33573452-33574081	7.59363e-08	0.231831	0.072	0.012	0.0153629	ENSMUST00000122427	Slc12a8	ENSMUSG00000035506	protein_coding	gap	chr16-33551115-33590251	chr16-33573452-33574081	0
chr6-52792197-52792884	7.62436e-08	0.281535	0.207	0.093	0.0154251	ENSMUST00000136250	Jazf1	ENSMUSG00000063568	protein_coding	gap	chr6-52777705-52812102	chr6-52792197-52792884	0
chr7-112204062-112204942	7.64071e-08	0.24157	0.062	0.007	0.0154581	ENSMUST00000050149	Mical2	ENSMUSG00000038244	protein_coding	exon	chr7-112225856-112226021	chr7-112204062-112204942	20913
chr15-98691779-98692719	7.71418e-08	0.269601	0.168	0.055	0.0156068	ENSMUST00000003451	Rnd1	ENSMUSG00000054855	protein_coding	exon	chr15-98677230-98677461	chr15-98691779-98692719	14317
chr1-119508539-119508787	7.85151e-08	0.264766	0.158	0.06	0.0158846	ENSMUST00000004565	Ralb	ENSMUSG00000004451	protein_coding	exon	chr1-119504577-119504794	chr1-119508539-119508787	3744
chr15-81247433-81248315	7.85295e-08	0.278048	0.191	0.065	0.0158875	ENSMUST00000166855	Mchr1	ENSMUSG00000050164	protein_coding	utr	chr15-81238113-81238963	chr15-81247433-81248315	8469
chr2-181677092-181677442	7.8919e-08	0.257637	0.264	0.125	0.0159663	ENSMUST00000103042	Tcea2	ENSMUSG00000059540	protein_coding	exon	chr2-181680310-181680475	chr2-181677092-181677442	2867
chr18-68794207-68794897	7.89282e-08	0.244477	0.072	0.012	0.0159682	ENSMUST00000025428	4930546C10Rik	ENSMUSG00000024546	protein_coding	cds	chr18-68944633-68944705	chr18-68794207-68794897	149735
chr4-62643421-62643797	7.9162e-08	0.263213	0.132	0.042	0.0160155	ENSMUST00000144489	Rgs3	ENSMUSG00000059810	protein_coding	gap	chr4-62640829-62646683	chr4-62643421-62643797	0
chr6-117552103-117552759	7.94283e-08	0.280575	0.109	0.026	0.0160694	ENSMUST00000008011	Gm9946	ENSMUSG00000054488	lincRNA	exon	chr6-117559697-117559902	chr6-117552103-117552759	6937
chr17-65736967-65737930	7.97945e-08	0.266002	0.168	0.071	0.0161435	ENSMUST00000070673	Rab31	ENSMUSG00000056515	protein_coding	gap	chr17-65722088-65772505	chr17-65736967-65737930	0
chr4-119247254-119248042	7.98415e-08	0.281102	0.207	0.096	0.016153	ENSMUST00000121111	Lepre1	ENSMUSG00000028641	protein_coding	cds	chr4-119247891-119248046	chr4-119247254-119248042	0
chr4-149048702-149050118	8.01232e-08	0.280925	0.142	0.042	0.01621	ENSMUST00000154860	Pex14	ENSMUSG00000028975	protein_coding	gap	chr4-149041806-149076019	chr4-149048702-149050118	0
chr16-36940819-36941526	8.04232e-08	0.238549	0.106	0.026	0.0162707	ENSMUST00000164050	Hcls1	ENSMUSG00000022831	protein_coding	gap	chr16-36937907-36946593	chr16-36940819-36941526	0
chr5-32712245-32714447	8.04307e-08	0.246829	0.561	0.338	0.0162722	ENSMUST00000142779	Pisd	ENSMUSG00000023452	protein_coding	utr	chr5-32736301-32737229	chr5-32712245-32714447	21853
chr9-63705993-63706773	8.06394e-08	0.270243	0.209	0.094	0.0163144	ENSMUST00000154323	Smad3	ENSMUSG00000032402	protein_coding	gap	chr9-63667923-63711915	chr9-63705993-63706773	0
chr5-114647242-114647958	8.13005e-08	0.26351	0.088	0.02	0.0164481	ENSMUST00000112225	Trpv4	ENSMUSG00000014158	protein_coding	gap	chr5-114644934-114658341	chr5-114647242-114647958	0
chr13-45820453-45820848	8.19574e-08	0.247671	0.072	0.006	0.016581	ENSMUST00000180110	Atxn1	ENSMUSG00000046876	protein_coding	gap	chr13-45795638-45852327	chr13-45820453-45820848	0
chr9-69455369-69455753	8.21099e-08	0.251933	0.124	0.035	0.0166119	ENSMUST00000134907	Anxa2	ENSMUSG00000032231	protein_coding	gap	chr9-69454162-69464459	chr9-69455369-69455753	0
chr17-7168912-7170801	8.2535e-08	0.239488	0.545	0.324	0.0166979	ENSMUST00000024575	Rps6ka2	ENSMUSG00000023809	protein_coding	cds	chr17-7170345-7170443	chr17-7168912-7170801	0
chr13-55361883-55363157	8.26398e-08	0.264633	0.364	0.193	0.0167191	ENSMUST00000021940	Lman2	ENSMUSG00000021484	protein_coding	cds	chr13-55362388-55362589	chr13-55361883-55363157	0
chr8-123131153-123131664	8.29434e-08	0.243313	0.101	0.023	0.0167805	ENSMUST00000134235	Cpne7	ENSMUSG00000034796	protein_coding	gap	chr8-123130307-123133608	chr8-123131153-123131664	0
chr3-90585484-90588078	8.38258e-08	0.26289	0.238	0.113	0.0169591	ENSMUST00000179550	S100a2	ENSMUSG00000094018	protein_coding	exon	chr3-90590247-90590354	chr3-90585484-90588078	2168
chr17-13737298-13737859	8.38352e-08	0.254186	0.119	0.038	0.0169609	ENSMUST00000148430	Tcte2	ENSMUSG00000038347	protein_coding	gap	chr17-13728023-13761285	chr17-13737298-13737859	0
chr7-141095980-141097499	8.45896e-08	0.259481	0.318	0.158	0.0171136	ENSMUST00000097958	Sigirr	ENSMUSG00000025494	protein_coding	gap	chr7-141095318-141100478	chr7-141095980-141097499	0
chr5-52865746-52866122	8.51034e-08	0.254303	0.098	0.023	0.0172175	ENSMUST00000031072	Anapc4	ENSMUSG00000029176	protein_coding	cds	chr5-52865894-52866017	chr5-52865746-52866122	0
chr18-75492950-75493695	8.51111e-08	0.264772	0.147	0.046	0.0172191	ENSMUST00000165559	Ctif	ENSMUSG00000052928	protein_coding	gap	chr18-75472021-75519738	chr18-75492950-75493695	0
chr13-97569948-97570315	8.55983e-08	0.275207	0.14	0.051	0.0173176	ENSMUST00000179324	Lincenc1	ENSMUSG00000078952	lincRNA	exon	chr13-97494405-97497007	chr13-97569948-97570315	72940
chr17-13658512-13660310	8.5786e-08	0.260234	0.202	0.093	0.0173556	ENSMUST00000185626	Tcte2	ENSMUSG00000038347	protein_coding	gap	chr17-13568884-13668758	chr17-13658512-13660310	0
chr1-126660320-126660827	8.60317e-08	0.229039	0.072	0.01	0.0174053	ENSMUST00000162664	Nckap5	ENSMUSG00000049690	protein_coding	gap	chr1-126528756-126695685	chr1-126660320-126660827	0
chr19-57293562-57294169	8.60524e-08	0.273664	0.137	0.046	0.0174095	ENSMUST00000156316	Ablim1	ENSMUSG00000025085	protein_coding	gap	chr19-57173460-57314692	chr19-57293562-57294169	0
chr8-71513035-71513629	8.61257e-08	0.248468	0.116	0.033	0.0174244	ENSMUST00000048452	Plvap	ENSMUSG00000034845	protein_coding	exon	chr8-71511351-71511769	chr8-71513035-71513629	1265
chr10-93319532-93320414	8.74618e-08	0.262252	0.109	0.03	0.0176947	ENSMUST00000008542	Elk3	ENSMUSG00000008398	protein_coding	exon	chr10-93310752-93311135	chr10-93319532-93320414	8396
chr4-47310206-47311198	8.83263e-08	0.248994	0.085	0.017	0.0178696	ENSMUST00000107731	Col15a1	ENSMUSG00000028339	protein_coding	cds	chr4-47310774-47310889	chr4-47310206-47311198	0
chr1-162508795-162509975	8.84562e-08	0.263654	0.121	0.028	0.0178958	ENSMUST00000028017	Mettl13	ENSMUSG00000026694	protein_coding	utr	chr1-162532127-162534275	chr1-162508795-162509975	22151
chr3-84219142-84221143	8.92401e-08	0.268352	0.132	0.044	0.0180544	ENSMUST00000154152	Trim2	ENSMUSG00000027993	protein_coding	cds	chr3-84220629-84220631	chr3-84219142-84221143	0
chr6-52170547-52170994	8.94499e-08	0.274077	0.127	0.042	0.0180969	ENSMUST00000114434	Hoxa3	ENSMUSG00000079560	protein_coding	cds	chr6-52169940-52170742	chr6-52170547-52170994	0
chr13-58458754-58459245	8.97475e-08	0.226511	0.059	0.006	0.0181571	ENSMUST00000042450	Rmi1	ENSMUSG00000035367	protein_coding	utr	chr13-58409790-58411149	chr13-58458754-58459245	47604
chr8-105345073-105345325	9.18821e-08	0.258822	0.124	0.041	0.0185889	ENSMUST00000132777	Fhod1	ENSMUSG00000014778	protein_coding	gap	chr8-105338961-105347652	chr8-105345073-105345325	0
chr9-75423681-75423991	9.21402e-08	0.252638	0.134	0.045	0.0186412	ENSMUST00000180533	4933433G15Rik	ENSMUSG00000097021	lincRNA	exon	chr9-75417048-75417709	chr9-75423681-75423991	5971
chr11-43742880-43743081	9.28448e-08	0.250799	0.057	0.006	0.0187837	ENSMUST00000109278	Ttc1	ENSMUSG00000041278	protein_coding	gap	chr11-43741822-43745084	chr11-43742880-43743081	0
chr18-82815125-82815902	9.32918e-08	0.246583	0.075	0.017	0.0188741	ENSMUST00000181345	4930445N18Rik	ENSMUSG00000097738	lincRNA	exon	chr18-82855894-82856130	chr18-82815125-82815902	39991
chr1-34010762-34012177	9.38742e-08	0.260132	0.217	0.097	0.018992	ENSMUST00000115104	Dst	ENSMUSG00000026131	protein_coding	cds	chr1-34011825-34011915	chr1-34010762-34012177	0
chr12-4038107-4039422	9.38772e-08	0.272468	0.173	0.058	0.0189926	ENSMUST00000111178	Efr3b	ENSMUSG00000020658	protein_coding	cds	chr12-4038704-4038710	chr12-4038107-4039422	0
chr2-33869354-33870691	9.43755e-08	0.264812	0.137	0.046	0.0190934	ENSMUST00000192765	Mvb12b	ENSMUSG00000038740	protein_coding	gap	chr2-33840267-33874337	chr2-33869354-33870691	0
chr7-101465209-101467131	9.43841e-08	0.252489	0.271	0.12	0.0190951	ENSMUST00000166652	Pde2a	ENSMUSG00000030653	protein_coding	gap	chr7-101451469-101481370	chr7-101465209-101467131	0
chr3-57516216-57516457	9.45926e-08	0.256358	0.096	0.028	0.0191373	ENSMUST00000120977	Wwtr1	ENSMUSG00000027803	protein_coding	gap	chr3-57501869-57574822	chr3-57516216-57516457	0
chr15-67087151-67087833	9.51073e-08	0.269789	0.191	0.081	0.0192414	ENSMUST00000092640	St3gal1	ENSMUSG00000013846	protein_coding	utr	chr15-67102875-67106656	chr15-67087151-67087833	15041
chr9-63968399-63968995	9.51525e-08	0.284799	0.183	0.073	0.0192506	ENSMUST00000144323	Smad6	ENSMUSG00000036867	protein_coding	gap	chr9-63954057-63989471	chr9-63968399-63968995	0
chr11-86577207-86577584	9.55127e-08	0.246317	0.147	0.06	0.0193235	ENSMUST00000018315	Vmp1	ENSMUSG00000018171	protein_coding	utr	chr11-86583865-86585307	chr11-86577207-86577584	6280
chr2-84523535-84523739	9.5905e-08	0.208187	0.052	0.004	0.0194028	ENSMUST00000139492	Gm13710	ENSMUSG00000087362	lincRNA	gap	chr2-84501628-84531175	chr2-84523535-84523739	0
chr5-139382058-139383092	9.60452e-08	0.299549	0.204	0.084	0.0194312	ENSMUST00000138631	Gpr146	ENSMUSG00000044197	protein_coding	gap	chr5-139378506-139392421	chr5-139382058-139383092	0
chr19-26853716-26854179	9.63135e-08	0.238802	0.08	0.016	0.0194855	ENSMUST00000177048	4931403E22Rik	ENSMUSG00000093772	processed_transcript	exon	chr19-26823848-26823907	chr19-26853716-26854179	29808
chr9-71825829-71826587	9.67551e-08	0.281089	0.127	0.026	0.0195748	ENSMUST00000183404	Tcf12	ENSMUSG00000032228	protein_coding	utr	chr9-71842688-71846560	chr9-71825829-71826587	16100
chr11-61533575-61533914	9.91813e-08	0.263143	0.158	0.062	0.0200657	ENSMUST00000179936	Epn2	ENSMUSG00000001036	protein_coding	cds	chr11-61533571-61533681	chr11-61533575-61533914	0
chr3-52048139-52048441	9.92331e-08	0.272244	0.16	0.062	0.0200762	ENSMUST00000121440	Maml3	ENSMUSG00000061143	protein_coding	gap	chr3-51857077-52103678	chr3-52048139-52048441	0
chr3-56270189-56270819	9.95717e-08	0.222337	0.083	0.019	0.0201447	ENSMUST00000029374	Nbea	ENSMUSG00000027799	protein_coding	exon	chr3-56182972-56183701	chr3-56270189-56270819	86487
chr7-111081930-111083572	9.98243e-08	0.243032	0.522	0.296	0.0201958	ENSMUST00000162415	Eif4g2	ENSMUSG00000005610	protein_coding	utr	chr7-111082785-111083030	chr7-111081930-111083572	0
chr1-21086234-21086611	9.99215e-08	0.213179	0.057	0.004	0.0202154	ENSMUST00000037998	Tram2	ENSMUSG00000041779	protein_coding	exon	chr1-21078994-21079229	chr1-21086234-21086611	7004
chr3-32509598-32511488	9.99896e-08	0.253707	0.47	0.267	0.0202292	ENSMUST00000193287	Zfp639	ENSMUSG00000027667	protein_coding	utr	chr3-32510259-32510589	chr3-32509598-32511488	0
chr12-72013534-72014859	1.00451e-07	0.255023	0.214	0.084	0.0203226	ENSMUST00000085299	Daam1	ENSMUSG00000034574	protein_coding	utr	chr12-71989889-71992367	chr12-72013534-72014859	21166
chr11-102244652-102245500	1.00772e-07	0.235155	0.15	0.057	0.0203875	ENSMUST00000100392	BC030867	ENSMUSG00000034773	protein_coding	exon	chr11-102248882-102249092	chr11-102244652-102245500	3381
chr6-116647849-116648049	1.01615e-07	0.252843	0.096	0.02	0.0205579	ENSMUST00000035842	Rassf4	ENSMUSG00000042129	protein_coding	gap	chr6-116647710-116659524	chr6-116647849-116648049	0
chr1-87273386-87273692	1.01629e-07	0.241359	0.054	0.004	0.0205608	ENSMUST00000118687	Efhd1	ENSMUSG00000026255	protein_coding	gap	chr1-87264755-87289467	chr1-87273386-87273692	0
chr2-84295103-84295411	1.0182e-07	0.267689	0.111	0.028	0.0205994	ENSMUST00000074262	Calcrl	ENSMUSG00000059588	protein_coding	utr	chr2-84330626-84333453	chr2-84295103-84295411	35214
chr12-85417663-85418409	1.02897e-07	0.250484	0.124	0.033	0.0208175	ENSMUST00000040766	Tmed10	ENSMUSG00000021248	protein_coding	exon	chr12-85374441-85374717	chr12-85417663-85418409	42945
chr13-112453956-112454266	1.03856e-07	0.247685	0.07	0.009	0.0210114	ENSMUST00000183663	Il6st	ENSMUSG00000021756	protein_coding	exon	chr13-112464070-112464250	chr13-112453956-112454266	9803
chr9-70834342-70835168	1.04045e-07	0.280089	0.168	0.057	0.0210497	ENSMUST00000034731	Lipc	ENSMUSG00000032207	protein_coding	gap	chr9-70823564-70934475	chr9-70834342-70835168	0
chr9-56508704-56509689	1.04133e-07	0.264045	0.173	0.074	0.0210674	ENSMUST00000034879	Hmg20a	ENSMUSG00000032329	protein_coding	utr	chr9-56494533-56496884	chr9-56508704-56509689	11819
chr1-51996626-51997320	1.04295e-07	0.234118	0.088	0.017	0.0211003	ENSMUST00000168302	Stat4	ENSMUSG00000062939	protein_coding	gap	chr1-51996350-52011782	chr1-51996626-51997320	0
chr19-42058481-42058775	1.04561e-07	0.192358	0.052	0.003	0.0211541	ENSMUST00000172244	Hoga1	ENSMUSG00000025176	protein_coding	gap	chr19-42046111-42063191	chr19-42058481-42058775	0
chr9-32949023-32949299	1.05587e-07	0.274392	0.101	0.025	0.0213616	ENSMUST00000185169	Gm27162	ENSMUSG00000099025	lincRNA	exon	chr9-32928877-32928966	chr9-32949023-32949299	20056
chr8-95209580-95210495	1.0586e-07	0.213085	0.057	0.004	0.0214168	ENSMUST00000119870	Cngb1	ENSMUSG00000031789	protein_coding	utr	chr8-95239045-95241193	chr8-95209580-95210495	28549
chr8-23206979-23209035	1.06125e-07	0.269426	0.331	0.164	0.0214705	ENSMUST00000167004	Agpat6	ENSMUSG00000031545	protein_coding	utr	chr8-23208299-23208453	chr8-23206979-23209035	0
chr12-5350548-5350939	1.06293e-07	0.201787	0.054	0.003	0.0215045	ENSMUST00000020958	Klhl29	ENSMUSG00000020627	protein_coding	gap	chr12-5291445-5375101	chr12-5350548-5350939	0
chr15-91702878-91703817	1.08233e-07	0.27583	0.196	0.071	0.0218969	ENSMUST00000060642	Lrrk2	ENSMUSG00000036273	protein_coding	gap	chr15-91702277-91705105	chr15-91702878-91703817	0
chr4-47151373-47152311	1.08338e-07	0.2721	0.16	0.055	0.0219182	ENSMUST00000045041	Galnt12	ENSMUSG00000039774	protein_coding	utr	chr4-47122578-47123070	chr4-47151373-47152311	28302
chr6-34453032-34453704	1.08611e-07	0.259729	0.129	0.036	0.0219734	ENSMUST00000045372	Bpgm	ENSMUSG00000038871	protein_coding	exon	chr6-34476207-34476422	chr6-34453032-34453704	22502
chr6-30374694-30375426	1.08822e-07	0.25663	0.109	0.029	0.0220162	ENSMUST00000152391	Zc3hc1	ENSMUSG00000039130	protein_coding	cds	chr6-30374765-30374919	chr6-30374694-30375426	0
chr10-62023894-62024493	1.09485e-07	0.262559	0.137	0.048	0.0221502	ENSMUST00000105454	Col13a1	ENSMUSG00000058806	protein_coding	exon	chr10-61978349-61979108	chr10-62023894-62024493	44785
chr2-21269876-21270285	1.09582e-07	0.23	0.09	0.016	0.0221698	ENSMUST00000054591	Thnsl1	ENSMUSG00000048550	protein_coding	utr	chr2-21213681-21215009	chr2-21269876-21270285	54866
chr7-31085070-31085443	1.10146e-07	0.257624	0.109	0.026	0.022284	ENSMUST00000167369	Fxyd3	ENSMUSG00000057092	protein_coding	exon	chr7-31076621-31076704	chr7-31085070-31085443	8365
chr11-4848540-4849973	1.1025e-07	0.260916	0.403	0.206	0.022305	ENSMUST00000172305	Nf2	ENSMUSG00000009073	protein_coding	cds	chr11-4848872-4848985	chr11-4848540-4849973	0
chr7-49212793-49213369	1.10755e-07	0.277535	0.142	0.039	0.0224073	ENSMUST00000183659	Nav2	ENSMUSG00000052512	protein_coding	gap	chr7-48964441-49362097	chr7-49212793-49213369	0
chr10-62529972-62530728	1.11344e-07	0.268142	0.227	0.106	0.0225264	ENSMUST00000160987	Srgn	ENSMUSG00000020077	protein_coding	exon	chr10-62527339-62527451	chr10-62529972-62530728	2520
chr13-98813644-98815789	1.12439e-07	0.252769	0.509	0.286	0.0227479	ENSMUST00000179563	Fcho2	ENSMUSG00000041685	protein_coding	cds	chr13-98815076-98815108	chr13-98813644-98815789	0
chr16-31066234-31067197	1.12764e-07	0.244645	0.271	0.129	0.0228136	ENSMUST00000153859	Xxylt1	ENSMUSG00000047434	protein_coding	gap	chr16-31050780-31069664	chr16-31066234-31067197	0
chr19-4231104-4232520	1.12786e-07	0.250289	0.406	0.209	0.0228181	ENSMUST00000025773	Pold4	ENSMUSG00000024854	protein_coding	cds	chr19-4232463-4232552	chr19-4231104-4232520	0
chr1-171441429-171442339	1.12937e-07	0.256789	0.209	0.09	0.0228486	ENSMUST00000144497	F11r	ENSMUSG00000038235	protein_coding	gap	chr1-171437702-171460362	chr1-171441429-171442339	0
chr19-40587740-40589797	1.13371e-07	0.258825	0.282	0.139	0.0229365	ENSMUST00000176955	Aldh18a1	ENSMUSG00000025007	protein_coding	utr	chr19-40588310-40588384	chr19-40587740-40589797	0
chr5-109556489-109559393	1.14045e-07	0.223859	0.682	0.444	0.0230728	ENSMUST00000044579	Crlf2	ENSMUSG00000033467	protein_coding	cds	chr5-109558805-109558883	chr5-109556489-109559393	0
chr1-189715868-189716775	1.15406e-07	0.260001	0.129	0.032	0.0233482	ENSMUST00000097442	Ptpn14	ENSMUSG00000026604	protein_coding	exon	chr1-189728268-189728664	chr1-189715868-189716775	11492
chr15-13244324-13244601	1.1563e-07	0.258644	0.093	0.019	0.0233934	ENSMUST00000036439	Cdh6	ENSMUSG00000039385	protein_coding	exon	chr15-13173514-13173639	chr15-13244324-13244601	70684
chr12-15800271-15800570	1.15757e-07	0.271141	0.165	0.058	0.0234192	ENSMUST00000020922	Trib2	ENSMUSG00000020601	protein_coding	gap	chr12-15794077-15809695	chr12-15800271-15800570	0
chr19-47507150-47509203	1.182e-07	0.251284	0.258	0.128	0.0239134	ENSMUST00000182808	Obfc1	ENSMUSG00000042694	protein_coding	cds	chr19-47507806-47507878	chr19-47507150-47509203	0
chr11-116670877-116671970	1.18302e-07	0.271821	0.266	0.125	0.023934	ENSMUST00000142834	1810032O08Rik	ENSMUSG00000020812	protein_coding	cds	chr11-116671703-116671756	chr11-116670877-116671970	0
chr6-31544281-31544682	1.19308e-07	0.274236	0.124	0.038	0.0241375	ENSMUST00000026698	Podxl	ENSMUSG00000025608	protein_coding	gap	chr6-31529037-31563578	chr6-31544281-31544682	0
chr7-27501545-27502010	1.19499e-07	0.285083	0.196	0.08	0.0241762	ENSMUST00000108355	Prx	ENSMUSG00000053198	protein_coding	gap	chr7-27499366-27504532	chr7-27501545-27502010	0
chr11-86919992-86920771	1.19854e-07	0.260669	0.16	0.052	0.0242481	ENSMUST00000018571	Ypel2	ENSMUSG00000018427	protein_coding	utr	chr11-86936425-86940598	chr11-86919992-86920771	15653
chr13-110747003-110747826	1.2124e-07	0.234838	0.075	0.013	0.0245285	ENSMUST00000022212	Plk2	ENSMUSG00000021701	protein_coding	utr	chr13-110400225-110400844	chr13-110747003-110747826	346158
chr11-117536492-117536906	1.21716e-07	0.243602	0.132	0.045	0.0246247	ENSMUST00000132261	Gm11734	ENSMUSG00000085419	lincRNA	exon	chr11-117532084-117532205	chr11-117536492-117536906	4286
chr17-74088992-74089672	1.22197e-07	0.247121	0.085	0.012	0.0247221	ENSMUST00000043458	Srd5a2	ENSMUSG00000038541	protein_coding	exon	chr17-74047547-74047916	chr17-74088992-74089672	41075
chr1-194641621-194642575	1.22348e-07	0.253552	0.085	0.017	0.0247525	ENSMUST00000027952	Plxna2	ENSMUSG00000026640	protein_coding	gap	chr1-194620398-194643685	chr1-194641621-194642575	0
chr2-169730454-169731032	1.23011e-07	0.243245	0.101	0.022	0.0248868	ENSMUST00000181446	Gm26883	ENSMUSG00000096972	lincRNA	gap	chr2-169633744-169790962	chr2-169730454-169731032	0
chr2-167671287-167671503	1.23213e-07	0.234778	0.07	0.009	0.0249275	ENSMUST00000148262	Tmem189	ENSMUSG00000090213	protein_coding	gap	chr2-167654728-167689510	chr2-167671287-167671503	0
chr3-87982339-87983156	1.23829e-07	0.289983	0.266	0.132	0.0250522	ENSMUST00000160694	Nes	ENSMUSG00000004891	protein_coding	utr	chr3-87980031-87980451	chr3-87982339-87983156	1887
chr10-95704844-95705216	1.23953e-07	0.2166	0.065	0.01	0.0250773	ENSMUST00000099328	Anapc15-ps	ENSMUSG00000074780	protein_coding	exon	chr10-95673397-95673451	chr10-95704844-95705216	31392
chr2-72752372-72752847	1.2409e-07	0.227904	0.057	0.004	0.025105	ENSMUST00000136807	6430710C18Rik	ENSMUSG00000085427	lincRNA	gap	chr2-72747650-72787397	chr2-72752372-72752847	0
chr6-88147285-88148016	1.24516e-07	0.278566	0.271	0.148	0.0251913	ENSMUST00000032143	Rpn1	ENSMUSG00000030062	protein_coding	utr	chr6-88103548-88105304	chr6-88147285-88148016	41980
chr7-104445444-104446703	1.25114e-07	0.272752	0.258	0.115	0.0253121	ENSMUST00000076922	Trim30a	ENSMUSG00000030921	protein_coding	gap	chr7-104436046-104465009	chr7-104445444-104446703	0
chr3-95650273-95652993	1.25669e-07	0.246381	0.295	0.141	0.0254244	ENSMUST00000037947	Mcl1	ENSMUSG00000038612	protein_coding	exon	chr3-95658721-95659487	chr3-95650273-95652993	5727
chr17-28259653-28260446	1.261e-07	0.255364	0.098	0.025	0.0255117	ENSMUST00000166744	Ppard	ENSMUSG00000002250	protein_coding	gap	chr17-28237096-28295340	chr17-28259653-28260446	0
chr7-75632942-75634399	1.26523e-07	0.241395	0.078	0.015	0.0255973	ENSMUST00000166315	Akap13	ENSMUSG00000066406	protein_coding	gap	chr7-75615049-75663411	chr7-75632942-75634399	0
chr16-30177433-30177996	1.27493e-07	0.233227	0.083	0.019	0.0257934	ENSMUST00000187479	1700025H01Rik	ENSMUSG00000101888	lincRNA	exon	chr16-30195071-30195249	chr16-30177433-30177996	17074
chr2-167574668-167575199	1.28505e-07	0.26616	0.165	0.055	0.0259983	ENSMUST00000127006	Gm11476	ENSMUSG00000085596	processed_transcript	gap	chr2-167558451-167604635	chr2-167574668-167575199	0
chr15-36351683-36351968	1.28573e-07	0.25494	0.088	0.026	0.0260119	ENSMUST00000090170	Rpl7a-ps3	ENSMUSG00000068579	protein_coding	exon	chr15-36308144-36308956	chr15-36351683-36351968	42726
chr5-96804201-96804612	1.28601e-07	0.259234	0.14	0.044	0.0260177	ENSMUST00000031447	Anxa3	ENSMUSG00000029484	protein_coding	gap	chr5-96797454-96811049	chr5-96804201-96804612	0
chr6-55202971-55204226	1.28904e-07	0.267349	0.289	0.129	0.026079	ENSMUST00000053094	Fam188b	ENSMUSG00000038022	protein_coding	cds	chr6-55203507-55203569	chr6-55202971-55204226	0
chr13-99238180-99239420	1.29181e-07	0.251756	0.217	0.097	0.026135	ENSMUST00000056558	Zfp366	ENSMUSG00000050919	protein_coding	gap	chr13-99234289-99243913	chr13-99238180-99239420	0
chr12-85531742-85533948	1.29888e-07	0.261402	0.253	0.113	0.0262781	ENSMUST00000021674	Fos	ENSMUSG00000021250	protein_coding	utr	chr12-85476459-85477273	chr12-85531742-85533948	54468
chr12-37019169-37019414	1.31427e-07	0.218942	0.052	0.003	0.0265893	ENSMUST00000190633	Gm29007	ENSMUSG00000101067	lincRNA	exon	chr12-37098550-37099151	chr12-37019169-37019414	79135
chr1-87639616-87640713	1.31622e-07	0.25194	0.171	0.083	0.0266288	ENSMUST00000169754	Inpp5d	ENSMUSG00000026288	protein_coding	gap	chr1-87635356-87665386	chr1-87639616-87640713	0
chr3-146845810-146846543	1.31758e-07	0.26126	0.152	0.054	0.0266564	ENSMUST00000038090	Ttll7	ENSMUSG00000036745	protein_coding	exon	chr3-146852367-146852589	chr3-146845810-146846543	5823
chr7-132735847-132736707	1.32032e-07	0.271373	0.124	0.036	0.0267118	ENSMUST00000124096	Fgfr2	ENSMUSG00000030849	protein_coding	gap	chr7-130172940-133081756	chr7-132735847-132736707	0
chr9-21858053-21858392	1.32872e-07	0.26669	0.173	0.065	0.0268818	ENSMUST00000034728	Dock6	ENSMUSG00000032198	protein_coding	exon	chr9-21852545-21852635	chr9-21858053-21858392	5417
chr12-113146062-113147106	1.33025e-07	0.267154	0.313	0.141	0.0269127	ENSMUST00000084882	Crip2	ENSMUSG00000006356	protein_coding	utr	chr12-113145031-113145504	chr12-113146062-113147106	557
chr7-134026120-134026893	1.33849e-07	0.225897	0.075	0.012	0.0270795	ENSMUST00000134504	Adam12	ENSMUSG00000054555	protein_coding	gap	chr7-134012356-134134718	chr7-134026120-134026893	0
chr2-84999413-84999777	1.33875e-07	0.258303	0.111	0.028	0.0270847	ENSMUST00000111616	P2rx3	ENSMUSG00000027071	protein_coding	cds	chr2-84999606-84999683	chr2-84999413-84999777	0
chr2-34609497-34609811	1.33957e-07	0.20869	0.057	0.006	0.0271013	ENSMUST00000147337	Mapkap1	ENSMUSG00000038696	protein_coding	gap	chr2-34597561-34619844	chr2-34609497-34609811	0
chr17-45584124-45585703	1.35149e-07	0.262625	0.323	0.155	0.0273425	ENSMUST00000171847	Slc29a1	ENSMUSG00000023942	protein_coding	cds	chr17-45585671-45585782	chr17-45584124-45585703	0
chr1-171248552-171249188	1.35483e-07	0.231048	0.183	0.074	0.02741	ENSMUST00000194778	Ndufs2	ENSMUSG00000013593	protein_coding	gap	chr1-171246198-171251217	chr1-171248552-171249188	0
chr18-38590120-38590603	1.35653e-07	0.241381	0.101	0.028	0.0274443	ENSMUST00000025295	Spry4	ENSMUSG00000024427	protein_coding	cds	chr18-38589806-38590708	chr18-38590120-38590603	0
chr18-35466948-35468635	1.35804e-07	0.210436	0.062	0.009	0.0274749	ENSMUST00000025215	Sil1	ENSMUSG00000024357	protein_coding	gap	chr18-35438381-35498790	chr18-35466948-35468635	0
chr2-169777222-169778045	1.36229e-07	0.267555	0.196	0.07	0.0275609	ENSMUST00000181446	Gm26883	ENSMUSG00000096972	lincRNA	gap	chr2-169633744-169790962	chr2-169777222-169778045	0
chr3-51118693-51119013	1.36625e-07	0.257288	0.085	0.019	0.027641	ENSMUST00000194318	RP24-88F2.2	ENSMUSG00000103464	lincRNA	exon	chr3-51103660-51105170	chr3-51118693-51119013	13522
chr7-74647007-74647800	1.36699e-07	0.256674	0.103	0.017	0.0276559	ENSMUST00000107453	Slco3a1	ENSMUSG00000025790	protein_coding	exon	chr7-74554411-74554780	chr7-74647007-74647800	92226
chr2-11529634-11530618	1.3734e-07	0.239978	0.186	0.074	0.0277857	ENSMUST00000195779	Pfkfb3	ENSMUSG00000026773	protein_coding	gap	chr2-11494029-11553826	chr2-11529634-11530618	0
chr1-164043544-164043890	1.37353e-07	0.235476	0.09	0.022	0.0277882	ENSMUST00000027874	Sele	ENSMUSG00000026582	protein_coding	exon	chr1-164048234-164048322	chr1-164043544-164043890	4343
chr17-80798292-80798615	1.39932e-07	0.226217	0.07	0.012	0.0283101	ENSMUST00000025089	Map4k3	ENSMUSG00000024242	protein_coding	exon	chr17-80727794-80728093	chr17-80798292-80798615	70198
chr19-3929061-3930015	1.40391e-07	0.257465	0.256	0.112	0.0284029	ENSMUST00000051803	Aldh3b1	ENSMUSG00000024885	protein_coding	utr	chr19-3929696-3929761	chr19-3929061-3930015	0
chr1-166137177-166139083	1.40662e-07	0.276433	0.16	0.057	0.0284578	ENSMUST00000166860	Gpa33	ENSMUSG00000000544	protein_coding	gap	chr1-166130605-166146638	chr1-166137177-166139083	0
chr6-115382252-115383082	1.41081e-07	0.221022	0.057	0.006	0.0285425	ENSMUST00000171644	Pparg	ENSMUSG00000000440	protein_coding	gap	chr6-115361371-115383678	chr6-115382252-115383082	0
chr13-112753338-112753859	1.41687e-07	0.257519	0.245	0.118	0.0286652	ENSMUST00000052514	Slc38a9	ENSMUSG00000047789	protein_coding	utr	chr13-112731665-112738743	chr13-112753338-112753859	14594
chr18-66763179-66763504	1.42496e-07	0.248407	0.09	0.016	0.0288288	ENSMUST00000057942	Mc4r	ENSMUSG00000047259	protein_coding	utr	chr18-66857715-66859041	chr18-66763179-66763504	94210
chr1-177469959-177470556	1.42868e-07	0.273095	0.119	0.036	0.0289041	ENSMUST00000193447	RP24-441N3.3	ENSMUSG00000103043	lincRNA	gap	chr1-177467442-177475098	chr1-177469959-177470556	0
chr4-11006471-11008271	1.42945e-07	0.249064	0.506	0.283	0.0289196	ENSMUST00000137891	Plekhf2	ENSMUSG00000049969	protein_coding	utr	chr4-11007866-11007927	chr4-11006471-11008271	0
chr4-130174054-130175690	1.45256e-07	0.248814	0.248	0.12	0.0293872	ENSMUST00000175992	Tinagl1	ENSMUSG00000028776	protein_coding	cds	chr4-130173893-130174199	chr4-130174054-130175690	0
chr7-134527251-134527764	1.45324e-07	0.239411	0.062	0.006	0.0294008	ENSMUST00000174271	D7Ertd443e	ENSMUSG00000030994	protein_coding	exon	chr7-134385533-134385661	chr7-134527251-134527764	141589
chr1-180777322-180778647	1.4594e-07	0.258302	0.264	0.125	0.0295256	ENSMUST00000193209	RP23-201I6.6	ENSMUSG00000103156	lincRNA	exon	chr1-180768481-180768656	chr1-180777322-180778647	8665
chr13-9190875-9191581	1.46186e-07	0.247678	0.078	0.01	0.0295754	ENSMUST00000091829	Larp4b	ENSMUSG00000033499	protein_coding	utr	chr13-9170943-9174451	chr13-9190875-9191581	16423
chr17-80800369-80802221	1.46345e-07	0.265543	0.264	0.132	0.0296075	ENSMUST00000025089	Map4k3	ENSMUSG00000024242	protein_coding	exon	chr17-80727794-80728093	chr17-80800369-80802221	72275
chr11-79213574-79214469	1.4648e-07	0.251431	0.367	0.203	0.0296348	ENSMUST00000017821	Wsb1	ENSMUSG00000017677	protein_coding	utr	chr11-79239372-79240302	chr11-79213574-79214469	24902
chr18-57747124-57747963	1.46553e-07	0.224483	0.072	0.01	0.0296495	ENSMUST00000135806	1700011I03Rik	ENSMUSG00000058925	protein_coding	utr	chr18-57730787-57731065	chr18-57747124-57747963	16058
chr17-34295800-34296577	1.47273e-07	0.227383	0.196	0.094	0.0297952	ENSMUST00000174074	Gm20513	ENSMUSG00000092415	lincRNA	gap	chr17-34293355-34304870	chr17-34295800-34296577	0
chrX-140513235-140513745	1.47888e-07	0.253741	0.08	0.017	0.0299196	ENSMUST00000055738	Tsc22d3	ENSMUSG00000031431	protein_coding	utr	chrX-140539528-140540867	chrX-140513235-140513745	25782
chr13-64421520-64422860	1.48183e-07	0.237565	0.098	0.022	0.0299793	ENSMUST00000021939	Cdk20	ENSMUSG00000021483	protein_coding	exon	chr13-64432553-64432670	chr13-64421520-64422860	9692
chr12-110498431-110499531	1.48375e-07	0.26461	0.15	0.061	0.0300181	ENSMUST00000109832	Ppp2r5c	ENSMUSG00000017843	protein_coding	gap	chr12-110485953-110522490	chr12-110498431-110499531	0
chr3-145885355-145886456	1.48684e-07	0.26864	0.121	0.029	0.0300807	ENSMUST00000127193	Ddah1	ENSMUSG00000028194	protein_coding	gap	chr3-145853277-145889083	chr3-145885355-145886456	0
chr5-140767622-140768668	1.49507e-07	0.260084	0.3	0.154	0.0302473	ENSMUST00000000153	Gna12	ENSMUSG00000000149	protein_coding	gap	chr5-140762641-140785396	chr5-140767622-140768668	0
chr9-121395753-121396382	1.52325e-07	0.247354	0.067	0.009	0.0308173	ENSMUST00000045903	Trak1	ENSMUSG00000032536	protein_coding	gap	chr9-121392052-121431478	chr9-121395753-121396382	0
chr15-99723225-99726187	1.5343e-07	0.240251	0.444	0.26	0.0310409	ENSMUST00000162194	Gpd1	ENSMUSG00000023019	protein_coding	cds	chr15-99723191-99723287	chr15-99723225-99726187	0
chr9-15525278-15525589	1.5382e-07	0.220933	0.059	0.007	0.0311198	ENSMUST00000178999	Smco4	ENSMUSG00000058173	protein_coding	gap	chr9-15520880-15525627	chr9-15525278-15525589	0
chr11-50108169-50109335	1.54042e-07	0.23688	0.101	0.03	0.0311647	ENSMUST00000054684	Rnf130	ENSMUSG00000020376	protein_coding	utr	chr11-50104554-50104758	chr11-50108169-50109335	3410
chr11-34009366-34011129	1.54809e-07	0.269964	0.158	0.051	0.0313198	ENSMUST00000141450	4930469K13Rik	ENSMUSG00000085684	processed_transcript	gap	chr11-33974279-34068070	chr11-34009366-34011129	0
chr5-119058206-119058842	1.54928e-07	0.262445	0.178	0.067	0.031344	ENSMUST00000190550	1700081H04Rik	ENSMUSG00000100573	lincRNA	exon	chr5-119108234-119108715	chr5-119058206-119058842	49391
chr7-80779037-80779729	1.55094e-07	0.243128	0.183	0.08	0.0313774	ENSMUST00000167377	Iqgap1	ENSMUSG00000030536	protein_coding	gap	chr7-80768466-80799849	chr7-80779037-80779729	0
chr6-88198015-88198809	1.56022e-07	0.275151	0.313	0.157	0.0315654	ENSMUST00000015197	Gata2	ENSMUSG00000015053	protein_coding	utr	chr6-88198664-88198881	chr6-88198015-88198809	0
chr2-131945044-131945451	1.56918e-07	0.226173	0.057	0.006	0.0317465	ENSMUST00000136783	Gm28045	ENSMUSG00000098754	protein_coding	gap	chr2-131912293-131946370	chr2-131945044-131945451	0
chr4-43405821-43406824	1.59127e-07	0.260483	0.297	0.152	0.0321935	ENSMUST00000139198	Rusc2	ENSMUSG00000035969	protein_coding	utr	chr4-43406557-43406680	chr4-43405821-43406824	0
chr19-40647142-40647961	1.59882e-07	0.263448	0.165	0.06	0.0323462	ENSMUST00000134063	Entpd1	ENSMUSG00000048120	protein_coding	gap	chr19-40612524-40711162	chr19-40647142-40647961	0
chr19-29470717-29470923	1.60053e-07	0.249521	0.09	0.017	0.0323808	ENSMUST00000112576	Pdcd1lg2	ENSMUSG00000016498	protein_coding	utr	chr19-29470516-29471157	chr19-29470717-29470923	0
chr1-136796343-136796916	1.60621e-07	0.249007	0.111	0.028	0.0324956	ENSMUST00000027649	Nr5a2	ENSMUSG00000026398	protein_coding	utr	chr1-136842571-136845462	chr1-136796343-136796916	45654
chr11-103411953-103413828	1.60764e-07	0.253623	0.31	0.16	0.0325247	ENSMUST00000041272	Plekhm1	ENSMUSG00000034247	protein_coding	utr	chr11-103412593-103412687	chr11-103411953-103413828	0
chr12-55442967-55443607	1.61094e-07	0.272145	0.129	0.048	0.0325914	ENSMUST00000021412	Psma6	ENSMUSG00000021024	protein_coding	utr	chr12-55418295-55418454	chr12-55442967-55443607	24512
chr4-137498380-137498594	1.6224e-07	0.252741	0.114	0.026	0.0328233	ENSMUST00000171332	Hspg2	ENSMUSG00000028763	protein_coding	gap	chr4-137468925-137501058	chr4-137498380-137498594	0
chr8-68740040-68740421	1.62563e-07	0.248421	0.085	0.019	0.0328887	ENSMUST00000078350	Csgalnact1	ENSMUSG00000036356	protein_coding	exon	chr8-68735026-68735146	chr8-68740040-68740421	4893
chr5-64701307-64702490	1.63832e-07	0.28925	0.168	0.062	0.0331453	ENSMUST00000180650	Gm26761	ENSMUSG00000097668	lincRNA	exon	chr5-64698429-64698520	chr5-64701307-64702490	2786
chr6-91642898-91643590	1.63838e-07	0.245583	0.065	0.007	0.0331466	ENSMUST00000032185	Slc6a6	ENSMUSG00000030096	protein_coding	exon	chr6-91684067-91684308	chr6-91642898-91643590	40476
chr11-76506471-76507135	1.63878e-07	0.263115	0.202	0.087	0.0331547	ENSMUST00000176179	Abr	ENSMUSG00000017631	protein_coding	gap	chr11-76486537-76508887	chr11-76506471-76507135	0
chr9-73070905-73071529	1.64548e-07	0.269244	0.155	0.067	0.0332903	ENSMUST00000184575	Rab27a	ENSMUSG00000032202	protein_coding	gap	chr9-73045012-73075392	chr9-73070905-73071529	0
chr13-45837533-45837983	1.66073e-07	0.214666	0.052	0.006	0.0335987	ENSMUST00000180110	Atxn1	ENSMUSG00000046876	protein_coding	gap	chr13-45795638-45852327	chr13-45837533-45837983	0
chr7-116200665-116201178	1.66194e-07	0.2257	0.054	0.004	0.0336231	ENSMUST00000183308	Plekha7	ENSMUSG00000045659	protein_coding	gap	chr7-116189354-116237451	chr7-116200665-116201178	0
chr11-97702216-97703695	1.66537e-07	0.245428	0.38	0.212	0.0336925	ENSMUST00000103147	Psmb3	ENSMUSG00000069744	protein_coding	cds	chr11-97703488-97703490	chr11-97702216-97703695	0
chr18-75366424-75367926	1.67345e-07	0.266341	0.37	0.199	0.0338561	ENSMUST00000026999	Smad7	ENSMUSG00000025880	protein_coding	utr	chr18-75367529-75368955	chr18-75366424-75367926	0
chr18-75584400-75584601	1.68129e-07	0.243872	0.07	0.013	0.0340147	ENSMUST00000165559	Ctif	ENSMUSG00000052928	protein_coding	gap	chr18-75565081-75605627	chr18-75584400-75584601	0
chr6-32527606-32528454	1.68926e-07	0.246865	0.088	0.019	0.0341758	ENSMUST00000115096	Plxna4	ENSMUSG00000029765	protein_coding	gap	chr6-32517765-32587303	chr6-32527606-32528454	0
chr16-38668838-38669511	1.69019e-07	0.260564	0.212	0.08	0.0341948	ENSMUST00000132697	Arhgap31	ENSMUSG00000022799	protein_coding	gap	chr16-38640350-38712573	chr16-38668838-38669511	0
chr2-153432537-153432856	1.7189e-07	0.253811	0.134	0.041	0.0347756	ENSMUST00000132770	Nol4l	ENSMUSG00000061411	protein_coding	gap	chr2-153420810-153436205	chr2-153432537-153432856	0
chr11-50212822-50213724	1.72044e-07	0.252017	0.292	0.147	0.0348068	ENSMUST00000147468	Mgat4b	ENSMUSG00000036620	protein_coding	gap	chr11-50211031-50230679	chr11-50212822-50213724	0
chr14-12099496-12100323	1.72228e-07	0.244125	0.178	0.077	0.034844	ENSMUST00000155727	Ptprg	ENSMUSG00000021745	protein_coding	gap	chr14-12091482-12109975	chr14-12099496-12100323	0
chr7-99482705-99483993	1.72284e-07	0.251844	0.292	0.144	0.0348553	ENSMUST00000107096	Rps3	ENSMUSG00000030744	protein_coding	cds	chr7-99483592-99483621	chr7-99482705-99483993	0
chr11-103688635-103689302	1.72951e-07	0.217116	0.054	0.004	0.0349903	ENSMUST00000107013	Gosr2	ENSMUSG00000020946	protein_coding	cds	chr11-103689255-103689319	chr11-103688635-103689302	0
chr5-123992098-123993031	1.7316e-07	0.257195	0.282	0.141	0.0350325	ENSMUST00000000939	Hip1r	ENSMUSG00000000915	protein_coding	gap	chr5-123991806-123994717	chr5-123992098-123993031	0
chr4-47162068-47162306	1.73475e-07	0.22499	0.07	0.01	0.0350962	ENSMUST00000045041	Galnt12	ENSMUSG00000039774	protein_coding	utr	chr4-47122578-47123070	chr4-47162068-47162306	38997
chr17-5976861-5978869	1.74058e-07	0.25602	0.302	0.138	0.0352142	ENSMUST00000146009	Synj2	ENSMUSG00000023805	protein_coding	gap	chr17-5975882-5985971	chr17-5976861-5978869	0
chr11-118362451-118363545	1.74334e-07	0.261055	0.274	0.144	0.03527	ENSMUST00000155707	Timp2	ENSMUSG00000017466	protein_coding	exon	chr11-118355554-118355740	chr11-118362451-118363545	6710
chr7-83842404-83843091	1.7523e-07	0.257466	0.093	0.02	0.0354512	ENSMUST00000094216	Mesdc1	ENSMUSG00000070462	protein_coding	utr	chr7-83879873-83882132	chr7-83842404-83843091	36781
chr2-172206705-172207361	1.75244e-07	0.228373	0.067	0.007	0.0354541	ENSMUST00000038532	Mc3r	ENSMUSG00000038537	protein_coding	exon	chr2-172248492-172251114	chr2-172206705-172207361	41130
chr1-58856696-58857131	1.75426e-07	0.24509	0.09	0.016	0.0354911	ENSMUST00000027189	Casp8	ENSMUSG00000026029	protein_coding	utr	chr1-58846755-58847503	chr1-58856696-58857131	9192
chr14-73508717-73510535	1.76696e-07	0.266079	0.222	0.112	0.0357479	ENSMUST00000022705	Med4	ENSMUSG00000022109	protein_coding	cds	chr14-73510061-73510185	chr14-73508717-73510535	0
chr5-96911378-96913101	1.76743e-07	0.251661	0.264	0.134	0.0357573	ENSMUST00000031447	Anxa3	ENSMUSG00000029484	protein_coding	utr	chr5-96845561-96845968	chr5-96911378-96913101	65409
chr15-77800481-77800909	1.76949e-07	0.254818	0.256	0.122	0.035799	ENSMUST00000129453	Myh9	ENSMUSG00000022443	protein_coding	gap	chr15-77797029-77807867	chr15-77800481-77800909	0
chr13-41670395-41671032	1.77036e-07	0.238421	0.096	0.023	0.0358168	ENSMUST00000067176	Gm5082	ENSMUSG00000054258	protein_coding	utr	chr13-41656429-41656524	chr13-41670395-41671032	13870
chr5-104115156-104115433	1.77323e-07	0.265591	0.15	0.057	0.0358747	ENSMUST00000181506	Gm26703	ENSMUSG00000097877	lincRNA	gap	chr5-104115220-104117381	chr5-104115156-104115433	0
chr5-75922280-75923085	1.78974e-07	0.254616	0.181	0.074	0.0362088	ENSMUST00000113516	Kdr	ENSMUSG00000062960	protein_coding	utr	chr5-75932827-75934422	chr5-75922280-75923085	9741
chr12-111694059-111694833	1.79507e-07	0.263833	0.147	0.065	0.0363166	ENSMUST00000168338	Trmt61a	ENSMUSG00000060950	protein_coding	utr	chr12-111682870-111683902	chr12-111694059-111694833	10156
chr8-3313427-3314202	1.79662e-07	0.204029	0.052	0.004	0.0363479	ENSMUST00000091291	Insr	ENSMUSG00000005534	protein_coding	exon	chr8-3279029-3279617	chr8-3313427-3314202	33809
chr17-33978033-33979295	1.8005e-07	0.244704	0.333	0.174	0.0364265	ENSMUST00000025178	Vps52	ENSMUSG00000024319	protein_coding	utr	chr17-33966106-33966984	chr17-33978033-33979295	11048
chr7-68756726-68757129	1.80342e-07	0.21255	0.052	0.004	0.0364856	ENSMUST00000048068	Arrdc4	ENSMUSG00000042659	protein_coding	exon	chr7-68748769-68749241	chr7-68756726-68757129	7484
chr1-153384867-153385544	1.80509e-07	0.234119	0.088	0.013	0.0365193	ENSMUST00000186785	E330020D12Rik	ENSMUSG00000073538	processed_transcript	exon	chr1-153404827-153406601	chr1-153384867-153385544	19282
chr9-75434040-75434771	1.80677e-07	0.247563	0.227	0.115	0.0365534	ENSMUST00000181896	A130057D12Rik	ENSMUSG00000097298	protein_coding	cds	chr9-75441122-75441652	chr9-75434040-75434771	6350
chr3-126914105-126914418	1.81055e-07	0.231013	0.059	0.007	0.0366298	ENSMUST00000182704	Ank2	ENSMUSG00000032826	protein_coding	utr	chr3-126921606-126923956	chr3-126914105-126914418	7187
chr9-65194977-65197006	1.81154e-07	0.265112	0.289	0.145	0.0366499	ENSMUST00000034961	Igdcc3	ENSMUSG00000032394	protein_coding	utr	chr9-65185335-65185857	chr9-65194977-65197006	9119
chr2-101822698-101823110	1.81718e-07	0.265295	0.124	0.032	0.0367639	ENSMUST00000163762	Prr5l	ENSMUSG00000032841	protein_coding	gap	chr2-101772409-101838183	chr2-101822698-101823110	0
chr11-86892526-86894659	1.82998e-07	0.251214	0.158	0.058	0.0370228	ENSMUST00000018571	Ypel2	ENSMUSG00000018427	protein_coding	utr	chr11-86936425-86940598	chr11-86892526-86894659	41765
chr8-24420344-24420713	1.85117e-07	0.238872	0.09	0.023	0.0374515	ENSMUST00000181338	Gm26714	ENSMUSG00000097654	lincRNA	exon	chr8-24422404-24422535	chr8-24420344-24420713	1690
chr9-56900404-56901543	1.86162e-07	0.255526	0.111	0.029	0.037663	ENSMUST00000035661	Cspg4	ENSMUSG00000032911	protein_coding	utr	chr9-56898891-56899870	chr9-56900404-56901543	533
chr14-31661550-31663153	1.86714e-07	0.235648	0.328	0.163	0.0377746	ENSMUST00000090147	Btd	ENSMUSG00000021900	protein_coding	cds	chr14-31662070-31662325	chr14-31661550-31663153	0
chr6-5092642-5093994	1.89391e-07	0.266543	0.147	0.054	0.0383163	ENSMUST00000177456	Ppp1r9a	ENSMUSG00000032827	protein_coding	gap	chr6-5077616-5100431	chr6-5092642-5093994	0
chr1-171183530-171184851	1.89735e-07	0.256962	0.183	0.067	0.0383858	ENSMUST00000111332	Pcp4l1	ENSMUSG00000038370	protein_coding	gap	chr1-171175625-171196010	chr1-171183530-171184851	0
chr11-116842467-116844112	1.90344e-07	0.2429	0.455	0.258	0.0385092	ENSMUST00000142495	Jmjd6	ENSMUSG00000056962	protein_coding	cds	chr11-116843065-116843193	chr11-116842467-116844112	0
chr17-13474345-13475121	1.90726e-07	0.256182	0.245	0.104	0.0385864	ENSMUST00000138345	Tcte2	ENSMUSG00000038347	protein_coding	exon	chr17-13482553-13483004	chr17-13474345-13475121	7431
chr11-101248311-101248886	1.91633e-07	0.271516	0.204	0.077	0.0387698	ENSMUST00000128260	Ramp2	ENSMUSG00000001240	protein_coding	gap	chr11-101247145-101253603	chr11-101248311-101248886	0
chr12-111916520-111917202	1.92585e-07	0.239405	0.137	0.049	0.0389624	ENSMUST00000054815	Ppp1r13b	ENSMUSG00000021285	protein_coding	exon	chr12-111907862-111908055	chr12-111916520-111917202	8464
chr7-116456935-116457652	1.93134e-07	0.242079	0.088	0.015	0.0390734	ENSMUST00000170430	Pik3c2a	ENSMUSG00000030660	protein_coding	exon	chr7-116443304-116443458	chr7-116456935-116457652	13476
chr10-61360715-61360926	1.9335e-07	0.233024	0.078	0.013	0.0391172	ENSMUST00000020289	Pald1	ENSMUSG00000020092	protein_coding	gap	chr10-61356037-61383291	chr10-61360715-61360926	0
chr12-51690634-51692527	1.94008e-07	0.2513	0.452	0.247	0.0392504	ENSMUST00000169503	Strn3	ENSMUSG00000020954	protein_coding	cds	chr12-51691422-51691703	chr12-51690634-51692527	0
chr6-115852219-115853945	1.94472e-07	0.257052	0.424	0.208	0.0393441	ENSMUST00000147282	Mbd4	ENSMUSG00000030322	protein_coding	cds	chr6-115852685-115852695	chr6-115852219-115853945	0
chr2-38524099-38524476	1.96695e-07	0.229026	0.075	0.013	0.0397939	ENSMUST00000156726	Nek6	ENSMUSG00000026749	protein_coding	gap	chr2-38514659-38550552	chr2-38524099-38524476	0
chr12-86790313-86790983	1.99239e-07	0.234605	0.072	0.016	0.0403086	ENSMUST00000095527	Lrrc74a	ENSMUSG00000059114	protein_coding	utr	chr12-86763624-86763795	chr12-86790313-86790983	26517
chr15-36792137-36794686	1.99654e-07	0.227054	0.579	0.358	0.0403926	ENSMUST00000151635	Ywhaz	ENSMUSG00000022285	protein_coding	utr	chr15-36793168-36793210	chr15-36792137-36794686	0
chr1-187290106-187290379	1.99922e-07	0.227535	0.067	0.007	0.0404468	ENSMUST00000161260	Gpatch2	ENSMUSG00000039210	protein_coding	gap	chr1-187233827-187304329	chr1-187290106-187290379	0
chr13-80884578-80886429	1.99938e-07	0.250571	0.486	0.269	0.0404501	ENSMUST00000161441	Arrdc3	ENSMUSG00000074794	protein_coding	utr	chr13-80886095-80886143	chr13-80884578-80886429	0
chr3-88296097-88297988	2.01271e-07	0.248515	0.421	0.231	0.0407197	ENSMUST00000168062	Cct3	ENSMUSG00000001416	protein_coding	cds	chr3-88297236-88297266	chr3-88296097-88297988	0
chr11-83467129-83467597	2.0382e-07	0.259532	0.165	0.07	0.0412354	ENSMUST00000108137	Mmp28	ENSMUSG00000020682	protein_coding	exon	chr11-83462748-83463071	chr11-83467129-83467597	4057
chr14-57921485-57922098	2.04186e-07	0.234987	0.072	0.013	0.0413095	ENSMUST00000022543	Micu2	ENSMUSG00000021973	protein_coding	gap	chr14-57919453-57923939	chr14-57921485-57922098	0
chr1-90490186-90490692	2.04236e-07	0.260398	0.225	0.106	0.0413195	ENSMUST00000187630	Gm28722	ENSMUSG00000101997	lincRNA	exon	chr1-90454337-90454501	chr1-90490186-90490692	35684
chr12-117480901-117481423	2.0437e-07	0.236421	0.101	0.023	0.0413467	ENSMUST00000109691	Rapgef5	ENSMUSG00000041992	protein_coding	exon	chr12-117516479-117516903	chr12-117480901-117481423	35055
chr8-111619956-111620245	2.04878e-07	0.252329	0.09	0.013	0.0414495	ENSMUST00000174454	Znrf1	ENSMUSG00000033545	protein_coding	gap	chr8-111619312-111621595	chr8-111619956-111620245	0
chr8-33885098-33885993	2.05522e-07	0.249269	0.14	0.046	0.0415798	ENSMUST00000191473	Rbpms	ENSMUSG00000031586	protein_coding	gap	chr8-33866405-33929475	chr8-33885098-33885993	0
chr10-99747807-99748332	2.05675e-07	0.263479	0.096	0.03	0.0416107	ENSMUST00000056085	Csl	ENSMUSG00000046934	protein_coding	utr	chr10-99757705-99757800	chr10-99747807-99748332	9372
chr8-25805947-25806631	2.06123e-07	0.255166	0.085	0.017	0.0417013	ENSMUST00000033979	Star	ENSMUSG00000031574	protein_coding	exon	chr8-25808474-25808632	chr8-25805947-25806631	1842
chr4-139587372-139587643	2.0687e-07	0.233419	0.083	0.023	0.0418525	ENSMUST00000174078	Iffo2	ENSMUSG00000041025	protein_coding	gap	chr4-139575598-139603212	chr4-139587372-139587643	0
chr12-21139540-21139839	2.08274e-07	0.239142	0.098	0.029	0.0421365	ENSMUST00000174530	Gm21989	ENSMUSG00000090370	processed_transcript	gap	chr12-21085786-21168203	chr12-21139540-21139839	0
chr3-116194568-116195239	2.08285e-07	0.258498	0.111	0.025	0.0421388	ENSMUST00000181404	Gm26544	ENSMUSG00000097362	lincRNA	exon	chr3-116163729-116165821	chr3-116194568-116195239	28746
chr1-155107814-155109057	2.08315e-07	0.224591	0.085	0.019	0.0421449	ENSMUST00000055322	Ier5	ENSMUSG00000056708	protein_coding	exon	chr1-155096361-155099636	chr1-155107814-155109057	8177
chr7-123084090-123085091	2.08963e-07	0.237775	0.09	0.02	0.0422759	ENSMUST00000094053	Tnrc6a	ENSMUSG00000052707	protein_coding	exon	chr7-123123885-123124332	chr7-123084090-123085091	38793
chr4-149457973-149458271	2.1069e-07	0.224076	0.07	0.01	0.0426253	ENSMUST00000030848	Rbp7	ENSMUSG00000028996	protein_coding	exon	chr4-149454878-149454978	chr4-149457973-149458271	2994
chr5-135488581-135489822	2.11271e-07	0.256333	0.292	0.164	0.042743	ENSMUST00000060311	Hip1	ENSMUSG00000039959	protein_coding	gap	chr5-135460471-135544936	chr5-135488581-135489822	0
chr7-80078756-80079258	2.1134e-07	0.261875	0.279	0.139	0.0427569	ENSMUST00000166250	Zfp710	ENSMUSG00000048897	protein_coding	gap	chr7-80024987-80081048	chr7-80078756-80079258	0
chr8-126788345-126789438	2.11757e-07	0.235257	0.09	0.02	0.0428411	ENSMUST00000179857	Tomm20	ENSMUSG00000093904	protein_coding	utr	chr8-126930664-126935014	chr8-126788345-126789438	141225
chr15-7088584-7089605	2.11806e-07	0.252114	0.183	0.094	0.042851	ENSMUST00000067190	Lifr	ENSMUSG00000054263	protein_coding	exon	chr15-7129559-7129826	chr15-7088584-7089605	39953
chr7-45628233-45629328	2.12932e-07	0.249125	0.284	0.138	0.0430789	ENSMUST00000057927	Rasip1	ENSMUSG00000044562	protein_coding	cds	chr7-45628414-45629081	chr7-45628233-45629328	0
chr9-14604354-14604647	2.14318e-07	0.216913	0.059	0.01	0.0433594	ENSMUST00000162901	Amotl1	ENSMUSG00000013076	protein_coding	gap	chr9-14596601-14615200	chr9-14604354-14604647	0
chr10-128247065-128247605	2.14566e-07	0.252701	0.171	0.07	0.0434094	ENSMUST00000105245	Timeless	ENSMUSG00000039994	protein_coding	cds	chr10-128247576-128247777	chr10-128247065-128247605	0
chr7-80860064-80861279	2.14673e-07	0.248028	0.32	0.164	0.0434312	ENSMUST00000147125	Zscan2	ENSMUSG00000038797	protein_coding	utr	chr7-80860953-80861077	chr7-80860064-80861279	0
chr13-110696575-110696983	2.17148e-07	0.277471	0.098	0.025	0.043932	ENSMUST00000022212	Plk2	ENSMUSG00000021701	protein_coding	utr	chr13-110400225-110400844	chr13-110696575-110696983	295730
chrX-6258529-6258791	2.17203e-07	0.239615	0.08	0.01	0.0439429	ENSMUST00000024049	Bmp15	ENSMUSG00000023279	protein_coding	utr	chrX-6314107-6315629	chrX-6258529-6258791	55315
chr16-87246201-87246803	2.17363e-07	0.260463	0.124	0.039	0.0439754	ENSMUST00000054442	N6amt1	ENSMUSG00000044442	protein_coding	exon	chr16-87354185-87354386	chr16-87246201-87246803	107381
chr14-76951354-76951794	2.18724e-07	0.274203	0.101	0.015	0.0442507	ENSMUST00000062789	Lacc1	ENSMUSG00000044350	protein_coding	utr	chr14-77024200-77024974	chr14-76951354-76951794	72405
chr8-120104527-120105225	2.19555e-07	0.286	0.176	0.073	0.0444188	ENSMUST00000127664	Gm20388	ENSMUSG00000092329	protein_coding	gap	chr8-119910940-124295357	chr8-120104527-120105225	0
chr6-39264560-39265146	2.20871e-07	0.264857	0.109	0.029	0.044685	ENSMUST00000002305	Kdm7a	ENSMUSG00000042599	protein_coding	exon	chr6-39206441-39206789	chr6-39264560-39265146	57770
chr2-32665111-32665691	2.21713e-07	0.263308	0.15	0.039	0.0448555	ENSMUST00000167841	Eng	ENSMUSG00000026814	protein_coding	gap	chr2-32657671-32669422	chr2-32665111-32665691	0
chr4-139146451-139147267	2.22305e-07	0.246718	0.109	0.025	0.0449751	ENSMUST00000143971	Minos1	ENSMUSG00000050608	protein_coding	exon	chr4-139130922-139131113	chr4-139146451-139147267	15337
chr2-167263192-167263855	2.23881e-07	0.262233	0.09	0.02	0.0452941	ENSMUST00000018113	Ptgis	ENSMUSG00000017969	protein_coding	exon	chr2-167240344-167240604	chr2-167263192-167263855	22587
chr10-61956394-61957013	2.24749e-07	0.249548	0.08	0.015	0.0454696	ENSMUST00000105454	Col13a1	ENSMUSG00000058806	protein_coding	gap	chr10-61920097-61961288	chr10-61956394-61957013	0
chr6-125354621-125355568	2.25043e-07	0.249427	0.214	0.103	0.045529	ENSMUST00000130257	Tnfrsf1a	ENSMUSG00000030341	protein_coding	gap	chr6-125350063-125356824	chr6-125354621-125355568	0
chr12-112339676-112340110	2.26813e-07	0.263091	0.098	0.022	0.0458872	ENSMUST00000050754	A730018C14Rik	ENSMUSG00000047828	protein_coding	utr	chr12-112413915-112414975	chr12-112339676-112340110	73804
chr19-21882062-21883505	2.2847e-07	0.244415	0.207	0.091	0.0462225	ENSMUST00000096194	Tmem2	ENSMUSG00000024754	protein_coding	utr	chr19-21856352-21858327	chr19-21882062-21883505	23734
chr2-32513982-32514771	2.29039e-07	0.263193	0.22	0.102	0.0463376	ENSMUST00000150621	Gm13412	ENSMUSG00000085017	lincRNA	exon	chr2-32525031-32525089	chr2-32513982-32514771	10259
chr12-40558466-40559521	2.29385e-07	0.262347	0.168	0.074	0.0464077	ENSMUST00000037488	Dock4	ENSMUSG00000035954	protein_coding	gap	chr12-40446395-40621220	chr12-40558466-40559521	0
chr11-22695020-22695425	2.29638e-07	0.241408	0.08	0.016	0.0464587	ENSMUST00000143643	Gm12055	ENSMUSG00000085979	lincRNA	exon	chr11-22729897-22730399	chr11-22695020-22695425	34471
chr12-111429339-111431051	2.29804e-07	0.261314	0.209	0.089	0.0464923	ENSMUST00000072646	Exoc3l4	ENSMUSG00000021280	protein_coding	cds	chr12-111430669-111430852	chr12-111429339-111431051	0
chr6-87621263-87621587	2.31082e-07	0.220205	0.054	0.006	0.0467509	ENSMUST00000065997	Aplf	ENSMUSG00000030051	protein_coding	utr	chr6-87628429-87629993	chr6-87621263-87621587	6841
chr5-53961302-53962489	2.32879e-07	0.270102	0.209	0.106	0.0471144	ENSMUST00000117661	Stim2	ENSMUSG00000039156	protein_coding	exon	chr5-53998417-53999034	chr5-53961302-53962489	35927
chr4-138247213-138247640	2.33145e-07	0.231712	0.08	0.019	0.0471683	ENSMUST00000105827	Hp1bp3	ENSMUSG00000028759	protein_coding	utr	chr4-138241741-138244683	chr4-138247213-138247640	2529
chr7-119959481-119961542	2.33499e-07	0.264426	0.137	0.035	0.0472399	ENSMUST00000046993	Dnah3	ENSMUSG00000052273	protein_coding	gap	chr7-119956204-119962134	chr7-119959481-119961542	0
chr7-19477936-19478302	2.34258e-07	0.248179	0.088	0.02	0.0473934	ENSMUST00000011407	Exoc3l2	ENSMUSG00000011263	protein_coding	exon	chr7-19489056-19489174	chr7-19477936-19478302	10753
chr14-31930236-31930839	2.3616e-07	0.256341	0.165	0.074	0.0477783	ENSMUST00000143315	D830044D21Rik	ENSMUSG00000046005	lincRNA	exon	chr14-31928064-31929879	chr14-31930236-31930839	356
chr6-149193248-149194014	2.38083e-07	0.26538	0.202	0.087	0.0481673	ENSMUST00000111535	Amn1	ENSMUSG00000068250	protein_coding	exon	chr6-149188606-149188712	chr6-149193248-149194014	4535
chr3-115768435-115769424	2.38307e-07	0.262935	0.313	0.164	0.0482125	ENSMUST00000055676	S1pr1	ENSMUSG00000045092	protein_coding	exon	chr3-115714709-115715055	chr3-115768435-115769424	53379
chr3-152142974-152143699	2.40182e-07	0.217154	0.057	0.004	0.048592	ENSMUST00000133102	Gipc2	ENSMUSG00000039131	protein_coding	gap	chr3-152137759-152165647	chr3-152142974-152143699	0
chr9-25150621-25152313	2.40758e-07	0.244333	0.494	0.271	0.0487085	ENSMUST00000008573	Herpud2	ENSMUSG00000008429	protein_coding	cds	chr9-25150820-25150966	chr9-25150621-25152313	0
chr2-167254182-167254573	2.42014e-07	0.252376	0.129	0.041	0.0489625	ENSMUST00000018113	Ptgis	ENSMUSG00000017969	protein_coding	exon	chr2-167240344-167240604	chr2-167254182-167254573	13577
chr10-77206343-77207129	2.42472e-07	0.248248	0.173	0.071	0.0490552	ENSMUST00000081654	Col18a1	ENSMUSG00000001435	protein_coding	exon	chr10-77166439-77166548	chr10-77206343-77207129	39794
chr3-151437223-151438183	2.42589e-07	0.247731	0.152	0.067	0.0490789	ENSMUST00000046977	Eltd1	ENSMUSG00000039167	protein_coding	cds	chr3-151437983-151438004	chr3-151437223-151438183	0
chr15-78520174-78520609	2.43037e-07	0.260302	0.129	0.035	0.0491696	ENSMUST00000023075	C1qtnf6	ENSMUSG00000022440	protein_coding	utr	chr15-78523346-78524850	chr15-78520174-78520609	2736
chr5-125226183-125226844	2.43645e-07	0.26663	0.222	0.089	0.0492926	ENSMUST00000111398	Ncor2	ENSMUSG00000029478	protein_coding	exon	chr5-125178997-125179219	chr5-125226183-125226844	46963
chr2-153436470-153437232	2.43937e-07	0.253904	0.08	0.015	0.0493517	ENSMUST00000132770	Nol4l	ENSMUSG00000061411	protein_coding	gap	chr2-153436348-153445514	chr2-153436470-153437232	0
chr12-17495839-17496385	2.4521e-07	0.22684	0.07	0.004	0.0496091	ENSMUST00000171737	Odc1	ENSMUSG00000011179	protein_coding	exon	chr12-17544873-17545168	chr12-17495839-17496385	48487
chr15-71850059-71850568	2.45558e-07	0.225017	0.075	0.015	0.0496795	ENSMUST00000159993	Col22a1	ENSMUSG00000079022	protein_coding	gap	chr15-71848593-71857250	chr15-71850059-71850568	0
chr16-42676435-42677607	2.45682e-07	0.25547	0.165	0.068	0.0497047	ENSMUST00000142270	4932412D23Rik	ENSMUSG00000075070	processed_transcript	exon	chr16-42725702-42729360	chr16-42676435-42677607	48094
chr7-25266905-25270283	2.47186e-07	0.210393	0.703	0.46	0.0500089	ENSMUST00000169392	Cic	ENSMUSG00000005442	protein_coding	utr	chr7-25268387-25268544	chr7-25266905-25270283	0
chr2-128427918-128430071	2.47773e-07	0.228957	0.24	0.113	0.0501277	ENSMUST00000154173	Gm14005	ENSMUSG00000074813	processed_transcript	gap	chr2-128330973-128429093	chr2-128427918-128430071	0
chr11-59838620-59840088	2.48147e-07	0.24924	0.39	0.213	0.0502034	ENSMUST00000141415	Cops3	ENSMUSG00000019373	protein_coding	cds	chr11-59839670-59839724	chr11-59838620-59840088	0
chr4-141928611-141929784	2.48617e-07	0.255292	0.109	0.02	0.0502984	ENSMUST00000105780	Fhad1	ENSMUSG00000051435	protein_coding	cds	chr4-141929530-141929637	chr4-141928611-141929784	0
chr2-158658670-158659356	2.48813e-07	0.272925	0.194	0.087	0.0503382	ENSMUST00000052927	Ppp1r16b	ENSMUSG00000037754	protein_coding	exon	chr2-158665398-158665609	chr2-158658670-158659356	6041
chr3-144604284-144604545	2.49445e-07	0.254475	0.075	0.009	0.0504659	ENSMUST00000082437	Sep15	ENSMUSG00000037072	protein_coding	utr	chr3-144596955-144597680	chr3-144604284-144604545	6603
chr14-76693863-76694215	2.49873e-07	0.265516	0.147	0.042	0.0505525	ENSMUST00000189375	1700108F19Rik	ENSMUSG00000101009	processed_transcript	exon	chr14-76686728-76687169	chr14-76693863-76694215	6693
chr5-114175421-114176343	2.50194e-07	0.256762	0.367	0.199	0.0506174	ENSMUST00000146841	Acacb	ENSMUSG00000042010	protein_coding	cds	chr5-114176144-114176190	chr5-114175421-114176343	0
chr7-136496206-136496469	2.55115e-07	0.231896	0.062	0.007	0.0516131	ENSMUST00000081510	Mgmt	ENSMUSG00000054612	protein_coding	exon	chr7-136894611-136894687	chr7-136496206-136496469	398141
chr12-29005371-29005678	2.55252e-07	0.230528	0.062	0.007	0.0516408	ENSMUST00000158958	Gm23342	ENSMUSG00000089583	rRNA	exon	chr12-29035180-29035294	chr12-29005371-29005678	29501
chr16-30820874-30822161	2.57186e-07	0.25238	0.191	0.077	0.0520321	ENSMUST00000055389	Xxylt1	ENSMUSG00000047434	protein_coding	utr	chr16-30955627-30957337	chr16-30820874-30822161	133465
chr13-102657824-102658874	2.5763e-07	0.237112	0.111	0.036	0.0521219	ENSMUST00000022124	Cd180	ENSMUSG00000021624	protein_coding	exon	chr13-102693558-102693789	chr13-102657824-102658874	34683
chr11-69472435-69472988	2.58289e-07	0.234263	0.103	0.026	0.0522551	ENSMUST00000108659	Dnah2	ENSMUSG00000005237	protein_coding	gap	chr11-69465800-69473351	chr11-69472435-69472988	0
chr7-47007201-47009039	2.58592e-07	0.240174	0.421	0.247	0.0523165	ENSMUST00000061639	Spty2d1	ENSMUSG00000049516	protein_coding	cds	chr7-47008075-47008134	chr7-47007201-47009039	0
chr19-57358235-57358643	2.60761e-07	0.272739	0.202	0.089	0.0527554	ENSMUST00000181921	B230217O12Rik	ENSMUSG00000097785	lincRNA	gap	chr19-57324798-57360013	chr19-57358235-57358643	0
chr19-21126476-21127916	2.61469e-07	0.247789	0.165	0.06	0.0528985	ENSMUST00000025659	Zfand5	ENSMUSG00000024750	protein_coding	exon	chr19-21272278-21272742	chr19-21126476-21127916	144361
chr11-88114981-88115411	2.61841e-07	0.262191	0.189	0.084	0.0529738	ENSMUST00000133149	Cuedc1	ENSMUSG00000018378	protein_coding	gap	chr11-88099344-88169564	chr11-88114981-88115411	0
chr8-36636815-36637596	2.62382e-07	0.267279	0.194	0.089	0.0530832	ENSMUST00000163663	Dlc1	ENSMUSG00000031523	protein_coding	gap	chr8-36599441-36763644	chr8-36636815-36637596	0
chr8-83859482-83859960	2.62412e-07	0.25343	0.106	0.025	0.0530893	ENSMUST00000181723	Gm26721	ENSMUSG00000096943	lincRNA	exon	chr8-83887079-83887557	chr8-83859482-83859960	27118
chr13-41703225-41703961	2.65011e-07	0.264825	0.191	0.077	0.0536152	ENSMUST00000067176	Gm5082	ENSMUSG00000054258	protein_coding	utr	chr13-41656429-41656524	chr13-41703225-41703961	46700
chr13-47217007-47217588	2.6559e-07	0.259292	0.155	0.055	0.0537324	ENSMUST00000110111	Rnf144b	ENSMUSG00000038068	protein_coding	gap	chr13-47207551-47220493	chr13-47217007-47217588	0
chr8-64871174-64872538	2.65807e-07	0.271934	0.132	0.044	0.0537763	ENSMUST00000034017	Klhl2	ENSMUSG00000031605	protein_coding	exon	chr8-64849633-64849818	chr8-64871174-64872538	21355
chr10-66911099-66911996	2.6707e-07	0.250781	0.307	0.152	0.0540317	ENSMUST00000181710	1110002J07Rik	ENSMUSG00000097134	lincRNA	exon	chr10-66912489-66913672	chr10-66911099-66911996	492
chr19-42068237-42069417	2.68659e-07	0.266357	0.284	0.149	0.0543532	ENSMUST00000172244	Hoga1	ENSMUSG00000025176	protein_coding	gap	chr19-42063326-42070187	chr19-42068237-42069417	0
chr5-114127354-114128332	2.71293e-07	0.249133	0.24	0.122	0.0548862	ENSMUST00000112279	Alkbh2	ENSMUSG00000044339	protein_coding	cds	chr5-114127526-114127739	chr5-114127354-114128332	0
chr11-98932805-98933568	2.74454e-07	0.239924	0.22	0.104	0.0555256	ENSMUST00000107474	Rara	ENSMUSG00000037992	protein_coding	gap	chr11-98927911-98950244	chr11-98932805-98933568	0
chr6-30343989-30344348	2.75699e-07	0.22512	0.07	0.015	0.0557774	ENSMUST00000157221	Gm25625	ENSMUSG00000087846	rRNA	exon	chr6-30347371-30347466	chr6-30343989-30344348	3022
chr16-31325862-31327835	2.76656e-07	0.25901	0.152	0.054	0.0559711	ENSMUST00000130560	Apod	ENSMUSG00000022548	protein_coding	exon	chr16-31314552-31314808	chr16-31325862-31327835	11053
chr5-43818551-43819375	2.76949e-07	0.22642	0.054	0.004	0.0560303	ENSMUST00000101237	Bst1	ENSMUSG00000029082	protein_coding	cds	chr5-43818927-43819093	chr5-43818551-43819375	0
chr10-111101994-111103502	2.77419e-07	0.251914	0.276	0.139	0.0561255	ENSMUST00000171120	Gm5428	ENSMUSG00000091086	protein_coding	exon	chr10-111125851-111126738	chr10-111101994-111103502	22348
chr19-47330460-47331216	2.81446e-07	0.223806	0.093	0.028	0.0569402	ENSMUST00000111800	Sh3pxd2a	ENSMUSG00000053617	protein_coding	gap	chr19-47320321-47343439	chr19-47330460-47331216	0
chr16-32200110-32203060	2.81696e-07	0.247956	0.233	0.11	0.0569907	ENSMUST00000099990	Bex6	ENSMUSG00000075269	protein_coding	utr	chr16-32186721-32186949	chr16-32200110-32203060	13160
chr18-68498746-68499402	2.82854e-07	0.256001	0.31	0.148	0.057225	ENSMUST00000052347	Mc2r	ENSMUSG00000045569	protein_coding	exon	chr18-68429212-68429251	chr18-68498746-68499402	69494
chr17-31833861-31834954	2.83264e-07	0.269644	0.183	0.065	0.057308	ENSMUST00000024839	Sik1	ENSMUSG00000024042	protein_coding	utr	chr17-31844248-31846282	chr17-31833861-31834954	9293
chr12-3234787-3238033	2.83765e-07	0.239255	0.439	0.247	0.0574093	ENSMUST00000021001	Rab10	ENSMUSG00000020671	protein_coding	utr	chr12-3247430-3249786	chr12-3234787-3238033	9396
chr17-33788627-33789018	2.84268e-07	0.225402	0.075	0.01	0.0575111	ENSMUST00000173637	4931413I07Rik	ENSMUSG00000092602	lincRNA	exon	chr17-33785485-33785724	chr17-33788627-33789018	2902
chr2-152349803-152350194	2.85242e-07	0.226417	0.07	0.015	0.0577082	ENSMUST00000128577	Gm14164	ENSMUSG00000068062	processed_transcript	gap	chr2-152345727-152361798	chr2-152349803-152350194	0
chr19-34328074-34328561	2.85653e-07	0.234643	0.096	0.025	0.0577912	ENSMUST00000025691	Fas	ENSMUSG00000024778	protein_coding	utr	chr19-34327325-34327770	chr19-34328074-34328561	303
chr10-62231890-62232097	2.8596e-07	0.235809	0.106	0.03	0.0578535	ENSMUST00000047883	Tspan15	ENSMUSG00000037031	protein_coding	exon	chr10-62231020-62231218	chr10-62231890-62232097	671
chr2-132595738-132596234	2.86462e-07	0.205498	0.059	0.009	0.0579551	ENSMUST00000143964	AU019990	ENSMUSG00000074783	lincRNA	exon	chr2-132598195-132598565	chr2-132595738-132596234	1960
chr12-76307877-76308327	2.87349e-07	0.207689	0.07	0.016	0.0581343	ENSMUST00000021443	Mthfd1	ENSMUSG00000021048	protein_coding	gap	chr12-76307264-76310908	chr12-76307877-76308327	0
chr11-106957177-106957832	2.87815e-07	0.254474	0.22	0.106	0.0582286	ENSMUST00000150366	Gm11707	ENSMUSG00000086481	lincRNA	exon	chr11-106972058-106972507	chr11-106957177-106957832	14225
chr11-119807044-119808039	2.88125e-07	0.257909	0.178	0.073	0.0582914	ENSMUST00000147781	Rptor	ENSMUSG00000025583	protein_coding	gap	chr11-119799467-119817077	chr11-119807044-119808039	0
chr2-147298041-147298931	2.88131e-07	0.261428	0.109	0.025	0.0582926	ENSMUST00000127688	Gm14110	ENSMUSG00000084774	lincRNA	exon	chr2-147323562-147323787	chr2-147298041-147298931	24630
chr6-112781355-112781984	2.88201e-07	0.219881	0.072	0.01	0.0583068	ENSMUST00000113169	Srgap3	ENSMUSG00000030257	protein_coding	gap	chr6-112781059-112795772	chr6-112781355-112781984	0
chr3-122078018-122078604	2.88943e-07	0.243573	0.32	0.168	0.058457	ENSMUST00000150738	Abca4	ENSMUSG00000028125	protein_coding	gap	chr3-122074590-122080907	chr3-122078018-122078604	0
chr7-141468297-141469137	2.8964e-07	0.26427	0.23	0.119	0.0585979	ENSMUST00000177840	Cd151	ENSMUSG00000025510	protein_coding	utr	chr7-141468419-141468546	chr7-141468297-141469137	0
chr11-96829111-96830695	2.8981e-07	0.232058	0.517	0.295	0.0586324	ENSMUST00000167149	Nfe2l1	ENSMUSG00000038615	protein_coding	utr	chr11-96829411-96829502	chr11-96829111-96830695	0
chr13-5302112-5302570	2.91668e-07	0.223908	0.07	0.009	0.0590083	ENSMUST00000065956	Gm5444	ENSMUSG00000053499	protein_coding	utr	chr13-4834378-4836485	chr13-5302112-5302570	465626
chr3-27598146-27599249	2.93863e-07	0.230643	0.072	0.013	0.0594523	ENSMUST00000195008	Fndc3b	ENSMUSG00000039286	protein_coding	gap	chr3-27556197-27620604	chr3-27598146-27599249	0
chr3-51380368-51381071	2.94788e-07	0.269462	0.15	0.055	0.0596395	ENSMUST00000195545	RP23-403H2.2	ENSMUSG00000102544	lincRNA	gap	chr3-51378451-51381493	chr3-51380368-51381071	0
chr10-19563367-19563916	2.96276e-07	0.246104	0.124	0.042	0.0599406	ENSMUST00000020188	Ifngr1	ENSMUSG00000020009	protein_coding	exon	chr10-19591949-19592197	chr10-19563367-19563916	28032
chr12-81690820-81691678	2.97055e-07	0.262924	0.171	0.062	0.060098	ENSMUST00000035987	Map3k9	ENSMUSG00000042724	protein_coding	utr	chr12-81714950-81722038	chr12-81690820-81691678	23271
chr7-45017014-45018232	2.97156e-07	0.220396	0.574	0.366	0.0601186	ENSMUST00000044111	Rras	ENSMUSG00000038387	protein_coding	cds	chr7-45018016-45018168	chr7-45017014-45018232	0
chr5-124929489-124930348	2.99315e-07	0.25606	0.127	0.042	0.0605554	ENSMUST00000141533	Zfp664	ENSMUSG00000079215	protein_coding	exon	chr5-124901262-124902693	chr5-124929489-124930348	26795
chr2-153065625-153066425	3.00018e-07	0.261175	0.186	0.08	0.0606975	ENSMUST00000129377	Ccm2l	ENSMUSG00000027474	protein_coding	cds	chr2-153066007-153066036	chr2-153065625-153066425	0
chr4-147867593-147869121	3.00791e-07	0.242936	0.382	0.215	0.0608538	ENSMUST00000094481	Fv1	ENSMUSG00000070583	protein_coding	cds	chr4-147868979-147870358	chr4-147867593-147869121	0
chr7-116206944-116207418	3.00995e-07	0.241035	0.07	0.01	0.0608952	ENSMUST00000183308	Plekha7	ENSMUSG00000045659	protein_coding	gap	chr7-116189354-116237451	chr7-116206944-116207418	0
chr6-72389405-72391526	3.01603e-07	0.248136	0.297	0.147	0.0610182	ENSMUST00000059983	Vamp8	ENSMUSG00000050732	protein_coding	cds	chr6-72390474-72390476	chr6-72389405-72391526	0
chr4-141315721-141316251	3.02207e-07	0.247061	0.142	0.054	0.0611404	ENSMUST00000006614	Epha2	ENSMUSG00000006445	protein_coding	gap	chr4-141309081-141316586	chr4-141315721-141316251	0
chr18-47329665-47331480	3.02643e-07	0.267692	0.212	0.09	0.0612285	ENSMUST00000156422	Sema6a	ENSMUSG00000019647	protein_coding	gap	chr18-47306494-47333191	chr18-47329665-47331480	0
chr7-71963446-71963866	3.03045e-07	0.276481	0.142	0.048	0.0613099	ENSMUST00000079323	Mctp2	ENSMUSG00000032776	protein_coding	utr	chr7-72077830-72080788	chr7-71963446-71963866	113963
chr15-25580484-25581076	3.06456e-07	0.228955	0.059	0.003	0.062	ENSMUST00000110457	Myo10	ENSMUSG00000022272	protein_coding	exon	chr15-25622525-25623030	chr15-25580484-25581076	41448
chr6-129235849-129236505	3.06918e-07	0.256151	0.297	0.135	0.0620935	ENSMUST00000181238	2310001H17Rik	ENSMUSG00000097354	lincRNA	gap	chr6-129216537-129237738	chr6-129235849-129236505	0
chr18-64682220-64683824	3.07163e-07	0.250823	0.183	0.074	0.062143	ENSMUST00000025482	Atp8b1	ENSMUSG00000039529	protein_coding	exon	chr18-64660700-64661000	chr18-64682220-64683824	21219
chr13-82892676-82893946	3.07545e-07	0.239542	0.085	0.019	0.0622203	ENSMUST00000005722	Mef2c	ENSMUSG00000005583	protein_coding	exon	chr13-83504034-83504376	chr13-82892676-82893946	610087
chr10-72778400-72778731	3.08388e-07	0.236796	0.072	0.01	0.062391	ENSMUST00000020081	Zwint	ENSMUSG00000019923	protein_coding	utr	chr10-72673966-72674964	chr10-72778400-72778731	103435
chr11-77785537-77786591	3.08536e-07	0.26034	0.16	0.065	0.0624208	ENSMUST00000092883	Gm10277	ENSMUSG00000069804	protein_coding	cds	chr11-77785499-77786143	chr11-77785537-77786591	0
chr2-167595364-167595914	3.09552e-07	0.248196	0.116	0.025	0.0626264	ENSMUST00000127006	Gm11476	ENSMUSG00000085596	processed_transcript	gap	chr2-167558451-167604635	chr2-167595364-167595914	0
chr16-91379780-91380504	3.09913e-07	0.242781	0.098	0.029	0.0626994	ENSMUST00000134491	Ifnar2	ENSMUSG00000022971	protein_coding	gap	chr16-91373075-91383860	chr16-91379780-91380504	0
chr14-79228048-79228249	3.12187e-07	0.243951	0.07	0.016	0.0631594	ENSMUST00000162937	Zfp957	ENSMUSG00000071262	protein_coding	gap	chr14-79223864-79247216	chr14-79228048-79228249	0
chr7-67740187-67742233	3.15303e-07	0.257248	0.14	0.035	0.0637899	ENSMUST00000074233	Synm	ENSMUSG00000030554	protein_coding	gap	chr7-67739176-67751803	chr7-67740187-67742233	0
chr9-14365105-14365980	3.1784e-07	0.245412	0.101	0.023	0.0643032	ENSMUST00000167549	Endod1	ENSMUSG00000037419	protein_coding	gap	chr9-14357888-14380670	chr9-14365105-14365980	0
chr1-164114995-164115323	3.19631e-07	0.227773	0.085	0.016	0.0646655	ENSMUST00000162746	Selp	ENSMUSG00000026580	protein_coding	utr	chr1-164115264-164115386	chr1-164114995-164115323	0
chr1-52675564-52675841	3.22717e-07	0.217032	0.054	0.009	0.0652899	ENSMUST00000156876	Mfsd6	ENSMUSG00000041439	protein_coding	gap	chr1-52663447-52676477	chr1-52675564-52675841	0
chr7-31002199-31003214	3.23188e-07	0.258759	0.199	0.091	0.0653851	ENSMUST00000129773	Fam187b	ENSMUSG00000046826	protein_coding	exon	chr7-30988980-30989720	chr7-31002199-31003214	12478
chr12-13177534-13177911	3.25367e-07	0.239642	0.078	0.02	0.065826	ENSMUST00000071103	Ddx1	ENSMUSG00000037149	protein_coding	utr	chr12-13219308-13219497	chr12-13177534-13177911	41396
chr6-119418441-119419238	3.25514e-07	0.278465	0.191	0.075	0.0658556	ENSMUST00000032272	Adipor2	ENSMUSG00000030168	protein_coding	exon	chr6-119417420-119417704	chr6-119418441-119419238	736
chr5-31696923-31699192	3.28497e-07	0.227798	0.426	0.234	0.0664591	ENSMUST00000031018	Rbks	ENSMUSG00000029136	protein_coding	cds	chr5-31697510-31697601	chr5-31696923-31699192	0
chr15-83535408-83535912	3.30257e-07	0.271779	0.129	0.049	0.0668152	ENSMUST00000016902	Bik	ENSMUSG00000016758	protein_coding	gap	chr15-83526937-83541294	chr15-83535408-83535912	0
chr1-53986274-53986748	3.31363e-07	0.207038	0.057	0.006	0.067039	ENSMUST00000146850	Hecw2	ENSMUSG00000042807	protein_coding	gap	chr1-53950922-54040200	chr1-53986274-53986748	0
chr4-131929119-131929393	3.31546e-07	0.240352	0.078	0.012	0.067076	ENSMUST00000155990	Epb4.1	ENSMUSG00000028906	protein_coding	gap	chr4-131928573-131929693	chr4-131929119-131929393	0
chr17-15365708-15365984	3.33159e-07	0.21735	0.059	0.009	0.0674024	ENSMUST00000014917	Dll1	ENSMUSG00000014773	protein_coding	utr	chr17-15367354-15368029	chr17-15365708-15365984	1369
chr2-125706371-125706906	3.34904e-07	0.241521	0.059	0.01	0.0677555	ENSMUST00000157002	Shc4	ENSMUSG00000035109	protein_coding	gap	chr2-125694897-125722792	chr2-125706371-125706906	0
chr1-135686722-135688938	3.34919e-07	0.238704	0.38	0.212	0.0677585	ENSMUST00000112103	Nav1	ENSMUSG00000090399	lincRNA	gap	chr1-135607905-135687918	chr1-135686722-135688938	0
chr2-25533640-25535075	3.36572e-07	0.243349	0.163	0.065	0.0680929	ENSMUST00000151742	Traf2	ENSMUSG00000026942	protein_coding	gap	chr2-25530449-25536675	chr2-25533640-25535075	0
chr6-115764195-115764500	3.36581e-07	0.257502	0.181	0.065	0.0680947	ENSMUST00000166254	Tmem40	ENSMUSG00000059900	protein_coding	exon	chr6-115762273-115762466	chr6-115764195-115764500	1728
chr19-21471779-21472850	3.3688e-07	0.259216	0.134	0.044	0.0681552	ENSMUST00000087600	Gda	ENSMUSG00000058624	protein_coding	cds	chr19-21472368-21472490	chr19-21471779-21472850	0
chr11-17468339-17469110	3.37376e-07	0.24091	0.088	0.012	0.0682555	ENSMUST00000000594	C1d	ENSMUSG00000000581	protein_coding	utr	chr11-17266696-17269176	chr11-17468339-17469110	199162
chr5-105636485-105637265	3.38243e-07	0.247929	0.124	0.044	0.0684309	ENSMUST00000067924	Lrrc8c	ENSMUSG00000054720	protein_coding	utr	chr5-105608773-105613018	chr5-105636485-105637265	23466
chr11-113536403-113537474	3.3887e-07	0.212378	0.072	0.019	0.0685577	ENSMUST00000149034	Slc39a11	ENSMUSG00000041654	protein_coding	gap	chr11-113523625-113559510	chr11-113536403-113537474	0
chr5-112908076-112908532	3.44131e-07	0.241809	0.096	0.017	0.0696222	ENSMUST00000065167	Adrbk2	ENSMUSG00000042249	protein_coding	utr	chr5-112910478-112914912	chr5-112908076-112908532	1945
chr8-121187283-121188128	3.50125e-07	0.260345	0.264	0.119	0.0708348	ENSMUST00000127664	Gm20388	ENSMUSG00000092329	protein_coding	gap	chr8-119910940-124295357	chr8-121187283-121188128	0
chr9-66591801-66593868	3.50426e-07	0.237763	0.419	0.235	0.0708957	ENSMUST00000174387	Usp3	ENSMUSG00000032376	protein_coding	cds	chr9-66592784-66592874	chr9-66591801-66593868	0
chr8-24407032-24407369	3.50932e-07	0.264945	0.109	0.03	0.070998	ENSMUST00000181338	Gm26714	ENSMUSG00000097654	lincRNA	exon	chr8-24422404-24422535	chr8-24407032-24407369	15034
chr13-54978781-54979370	3.52056e-07	0.222789	0.065	0.012	0.0712255	ENSMUST00000109994	Unc5a	ENSMUSG00000025876	protein_coding	gap	chr13-54949732-54990879	chr13-54978781-54979370	0
chr4-94745791-94746873	3.52934e-07	0.260373	0.276	0.136	0.0714031	ENSMUST00000102798	Tek	ENSMUSG00000006386	protein_coding	gap	chr4-94739693-94780815	chr4-94745791-94746873	0
chr4-136122912-136123696	3.55028e-07	0.229905	0.075	0.016	0.0718267	ENSMUST00000008016	Id3	ENSMUSG00000007872	protein_coding	exon	chr4-136143497-136144178	chr4-136122912-136123696	19800
chr17-67566236-67566581	3.5805e-07	0.253325	0.127	0.048	0.0724383	ENSMUST00000097290	Lrrc30	ENSMUSG00000073375	protein_coding	utr	chr17-67630965-67631680	chr17-67566236-67566581	64383
chr7-97391366-97392442	3.63639e-07	0.265239	0.16	0.055	0.0735689	ENSMUST00000098300	Alg8	ENSMUSG00000035704	protein_coding	cds	chr7-97391528-97391759	chr7-97391366-97392442	0
chr11-115813003-115815359	3.64673e-07	0.231134	0.481	0.267	0.073778	ENSMUST00000106481	Tsen54	ENSMUSG00000020781	protein_coding	cds	chr11-115815327-115815410	chr11-115813003-115815359	0
chr2-120128125-120129061	3.65815e-07	0.247102	0.214	0.107	0.0740092	ENSMUST00000152366	Ehd4	ENSMUSG00000027293	protein_coding	gap	chr2-120127690-120136898	chr2-120128125-120129061	0
chr5-104373815-104374645	3.68185e-07	0.252562	0.088	0.016	0.0744886	ENSMUST00000066207	Mepe	ENSMUSG00000053863	protein_coding	utr	chr5-104338322-104338611	chr5-104373815-104374645	35203
chr4-47139318-47139808	3.70031e-07	0.244014	0.137	0.046	0.0748621	ENSMUST00000045041	Galnt12	ENSMUSG00000039774	protein_coding	utr	chr4-47122578-47123070	chr4-47139318-47139808	16247
chr5-72201626-72202274	3.73872e-07	0.247885	0.183	0.084	0.0756391	ENSMUST00000126664	Atp10d	ENSMUSG00000046808	processed_transcript	exon	chr5-72203329-72203563	chr5-72201626-72202274	1054
chr11-4974450-4975112	3.74931e-07	0.250165	0.173	0.067	0.0758534	ENSMUST00000009234	Ap1b1	ENSMUSG00000009090	protein_coding	exon	chr11-4986824-4987051	chr11-4974450-4975112	11711
chr17-14693752-14694388	3.76088e-07	0.237423	0.096	0.017	0.0760875	ENSMUST00000170872	Thbs2	ENSMUSG00000023885	protein_coding	utr	chr17-14693970-14694262	chr17-14693752-14694388	0
chr12-69501323-69502910	3.7905e-07	0.249528	0.261	0.134	0.0766867	ENSMUST00000058639	Vcpkmt	ENSMUSG00000049882	protein_coding	utr	chr12-69577628-69577925	chr12-69501323-69502910	74717
chr12-111704495-111705968	3.81863e-07	0.266632	0.209	0.084	0.0772559	ENSMUST00000054636	Bag5	ENSMUSG00000049792	protein_coding	utr	chr12-111709488-111710043	chr12-111704495-111705968	3519
chr2-30749965-30750402	3.82118e-07	0.266109	0.183	0.074	0.0773074	ENSMUST00000134755	Gm14488	ENSMUSG00000075416	processed_transcript	exon	chr2-30719973-30720057	chr2-30749965-30750402	29907
chr15-6913973-6914648	3.83388e-07	0.210051	0.057	0.007	0.0775644	ENSMUST00000022746	Osmr	ENSMUSG00000022146	protein_coding	exon	chr15-6874201-6874969	chr15-6913973-6914648	39003
chr11-67667298-67668010	3.83568e-07	0.246829	0.106	0.023	0.0776008	ENSMUST00000151784	Gas7	ENSMUSG00000033066	protein_coding	gap	chr11-67665463-67670593	chr11-67667298-67668010	0
chr12-79751375-79752109	3.83615e-07	0.236451	0.116	0.041	0.0776104	ENSMUST00000079533	Rad51b	ENSMUSG00000059060	protein_coding	utr	chr12-79507730-79508656	chr12-79751375-79752109	242718
chr11-79738583-79739643	3.84001e-07	0.24687	0.333	0.192	0.0776885	ENSMUST00000137738	Gm11205	ENSMUSG00000084969	lincRNA	exon	chr11-79705151-79705420	chr11-79738583-79739643	33162
chr19-46340816-46341194	3.85227e-07	0.198603	0.057	0.007	0.0779364	ENSMUST00000128041	Tmem180	ENSMUSG00000025227	protein_coding	utr	chr19-46341121-46341170	chr19-46340816-46341194	0
chr10-25331180-25332214	3.86204e-07	0.243961	0.178	0.08	0.078134	ENSMUST00000176231	Akap7	ENSMUSG00000039166	protein_coding	exon	chr10-25307785-25307870	chr10-25331180-25332214	23309
chr7-110940820-110941970	3.86509e-07	0.237906	0.088	0.017	0.0781959	ENSMUST00000154466	Mrvi1	ENSMUSG00000005611	protein_coding	gap	chr7-110929579-110945832	chr7-110940820-110941970	0
chr15-75827977-75828558	3.8923e-07	0.267699	0.222	0.093	0.0787464	ENSMUST00000100538	Zc3h3	ENSMUSG00000075600	protein_coding	gap	chr15-75809679-75837466	chr15-75827977-75828558	0
chr4-98091126-98092268	3.92947e-07	0.250674	0.271	0.11	0.0794983	ENSMUST00000107062	Nfia	ENSMUSG00000028565	protein_coding	gap	chr4-98065447-98111217	chr4-98091126-98092268	0
chr17-28510487-28510995	3.96717e-07	0.246955	0.116	0.032	0.0802611	ENSMUST00000177939	Fkbp5	ENSMUSG00000024222	protein_coding	gap	chr17-28507470-28517394	chr17-28510487-28510995	0
chr15-50703642-50704258	3.97418e-07	0.241344	0.093	0.019	0.0804029	ENSMUST00000184885	Trps1	ENSMUSG00000038679	protein_coding	gap	chr15-50664810-50822104	chr15-50703642-50704258	0
chr7-142033975-142034531	3.99095e-07	0.259417	0.183	0.084	0.0807422	ENSMUST00000084418	Mob2	ENSMUSG00000025147	protein_coding	gap	chr7-142016506-142060984	chr7-142033975-142034531	0
chr9-37368548-37369190	3.99499e-07	0.248969	0.096	0.023	0.0808238	ENSMUST00000051839	Hepacam	ENSMUSG00000046240	protein_coding	gap	chr9-37367762-37380462	chr9-37368548-37369190	0
chr8-87893583-87893935	4.01853e-07	0.243908	0.09	0.017	0.0813001	ENSMUST00000174764	Zfp423	ENSMUSG00000045333	protein_coding	gap	chr8-87859485-87904488	chr8-87893583-87893935	0
chr13-102869488-102869825	4.02624e-07	0.248129	0.163	0.058	0.081456	ENSMUST00000194446	Mast4	ENSMUSG00000034751	protein_coding	gap	chr13-102853920-103007204	chr13-102869488-102869825	0
chr8-125872676-125872981	4.05197e-07	0.22705	0.078	0.012	0.0819766	ENSMUST00000187772	Pcnxl2	ENSMUSG00000060212	protein_coding	gap	chr8-125861261-125897928	chr8-125872676-125872981	0
chr16-87665277-87665581	4.06576e-07	0.243806	0.098	0.019	0.0822557	ENSMUST00000026703	Bach1	ENSMUSG00000025612	protein_coding	exon	chr16-87698945-87699056	chr16-87665277-87665581	33363
chr6-87051764-87052403	4.0894e-07	0.201923	0.052	0.003	0.0827339	ENSMUST00000150410	Gfpt1	ENSMUSG00000029992	protein_coding	gap	chr6-87051029-87053750	chr6-87051764-87052403	0
chr1-135770890-135771469	4.10167e-07	0.262791	0.191	0.083	0.0829821	ENSMUST00000038945	Phlda3	ENSMUSG00000041801	protein_coding	utr	chr1-135768478-135769136	chr1-135770890-135771469	1753
chr15-73731453-73733444	4.12617e-07	0.247207	0.279	0.134	0.0834778	ENSMUST00000167582	Ptp4a3	ENSMUSG00000059895	protein_coding	gap	chr15-73723516-73753755	chr15-73731453-73733444	0
chr19-57264165-57265132	4.14073e-07	0.216505	0.085	0.023	0.0837724	ENSMUST00000156316	Ablim1	ENSMUSG00000025085	protein_coding	gap	chr19-57173460-57314692	chr19-57264165-57265132	0
chr6-31012167-31012611	4.17037e-07	0.214942	0.065	0.009	0.0843719	ENSMUST00000183056	Gm27019	ENSMUSG00000097998	lincRNA	exon	chr6-31063092-31063495	chr6-31012167-31012611	50480
chr1-125592436-125592779	4.18357e-07	0.205713	0.059	0.004	0.084639	ENSMUST00000189443	Slc35f5	ENSMUSG00000026342	protein_coding	gap	chr1-125591130-125594912	chr1-125592436-125592779	0
chr11-120726858-120727474	4.1971e-07	0.24379	0.214	0.106	0.0849129	ENSMUST00000106148	Dcxr	ENSMUSG00000039450	protein_coding	cds	chr11-120727178-120727229	chr11-120726858-120727474	0
chr17-88131993-88133409	4.20176e-07	0.228651	0.16	0.065	0.085007	ENSMUST00000180785	Gm26612	ENSMUSG00000097676	lincRNA	exon	chr17-88146084-88147059	chr17-88131993-88133409	12674
chr7-72143321-72143678	4.21085e-07	0.218424	0.072	0.009	0.0851909	ENSMUST00000079323	Mctp2	ENSMUSG00000032776	protein_coding	gap	chr7-72127261-72161139	chr7-72143321-72143678	0
chr2-4554913-4555572	4.24804e-07	0.240177	0.199	0.084	0.0859434	ENSMUST00000177457	Frmd4a	ENSMUSG00000026657	protein_coding	gap	chr2-4537326-4560213	chr2-4554913-4555572	0
chr14-63131730-63132682	4.24961e-07	0.254982	0.158	0.058	0.085975	ENSMUST00000006235	Ctsb	ENSMUSG00000021939	protein_coding	gap	chr14-63122566-63133315	chr14-63131730-63132682	0
chr18-38127089-38127683	4.25009e-07	0.266624	0.152	0.044	0.0859849	ENSMUST00000160721	Pcdh1	ENSMUSG00000051375	protein_coding	utr	chr18-38185914-38189942	chr18-38127089-38127683	58230
chr1-133069678-133070574	4.25287e-07	0.227029	0.083	0.02	0.0860411	ENSMUST00000077730	Pik3c2b	ENSMUSG00000026447	protein_coding	cds	chr1-133070318-133070418	chr1-133069678-133070574	0
chr17-64621870-64622738	4.25303e-07	0.253455	0.183	0.075	0.0860442	ENSMUST00000086723	Man2a1	ENSMUSG00000024085	protein_coding	gap	chr17-64601871-64624527	chr17-64621870-64622738	0
chr9-57072561-57073914	4.30053e-07	0.221558	0.579	0.35	0.0870054	ENSMUST00000169879	Sin3a	ENSMUSG00000042557	protein_coding	gap	chr9-57072064-57086580	chr9-57072561-57073914	0
chr4-131722229-131723803	4.31548e-07	0.262125	0.134	0.048	0.0873078	ENSMUST00000152128	Gm16080	ENSMUSG00000086856	lincRNA	exon	chr4-131710447-131710508	chr4-131722229-131723803	11720
chr6-48699966-48700610	4.32973e-07	0.245293	0.233	0.115	0.0875962	ENSMUST00000053661	Gimap6	ENSMUSG00000047867	protein_coding	utr	chr6-48701582-48702182	chr6-48699966-48700610	971
chr13-76579151-76579873	4.33875e-07	0.214243	0.078	0.022	0.0877786	ENSMUST00000126960	Mctp1	ENSMUSG00000021596	protein_coding	cds	chr13-76579761-76579817	chr13-76579151-76579873	0
chr16-87132127-87132352	4.35566e-07	0.248525	0.119	0.041	0.0881207	ENSMUST00000054442	N6amt1	ENSMUSG00000044442	protein_coding	exon	chr16-87354185-87354386	chr16-87132127-87132352	221832
chr4-133057298-133058220	4.35868e-07	0.250319	0.165	0.074	0.0881817	ENSMUST00000156677	Ahdc1	ENSMUSG00000037692	protein_coding	gap	chr4-133055506-133060675	chr4-133057298-133058220	0
chr13-28457437-28457758	4.36402e-07	0.211237	0.054	0.004	0.0882899	ENSMUST00000134787	2610307P16Rik	ENSMUSG00000085936	processed_transcript	exon	chr13-28460034-28461061	chr13-28457437-28457758	2275
chr6-115675239-115677083	4.37325e-07	0.242496	0.354	0.181	0.0884765	ENSMUST00000112949	Raf1	ENSMUSG00000000441	protein_coding	utr	chr6-115675689-115675964	chr6-115675239-115677083	0
chr19-6296585-6298016	4.37922e-07	0.238355	0.202	0.093	0.0885972	ENSMUST00000025684	Ehd1	ENSMUSG00000024772	protein_coding	cds	chr19-6297533-6297697	chr19-6296585-6298016	0
chr3-135674699-135675015	4.40614e-07	0.235946	0.106	0.028	0.0891418	ENSMUST00000138602	Nfkb1	ENSMUSG00000028163	protein_coding	gap	chr3-135669340-135691122	chr3-135674699-135675015	0
chr8-117267278-117268261	4.40828e-07	0.225863	0.101	0.032	0.0891852	ENSMUST00000166750	Cmip	ENSMUSG00000034390	protein_coding	gap	chr8-117257402-117377074	chr8-117267278-117268261	0
chr5-113974594-113976282	4.41063e-07	0.255954	0.181	0.07	0.0892327	ENSMUST00000162322	Ssh1	ENSMUSG00000042121	protein_coding	gap	chr5-113970475-113989645	chr5-113974594-113976282	0
chr8-69995153-69996937	4.43432e-07	0.222332	0.597	0.366	0.0897121	ENSMUST00000177851	Gatad2a	ENSMUSG00000036180	protein_coding	utr	chr8-69995943-69996379	chr8-69995153-69996937	0
chr9-111055901-111058189	4.4538e-07	0.235409	0.204	0.109	0.0901062	ENSMUST00000111888	Ccrl2	ENSMUSG00000043953	protein_coding	cds	chr9-111055346-111056428	chr9-111055901-111058189	0
chr5-53948432-53949084	4.47098e-07	0.256679	0.225	0.103	0.0904538	ENSMUST00000037337	Tbc1d19	ENSMUSG00000039178	protein_coding	utr	chr5-53903407-53904380	chr5-53948432-53949084	44051
chr12-69537280-69538890	4.49386e-07	0.242003	0.214	0.08	0.0909167	ENSMUST00000058639	Vcpkmt	ENSMUSG00000049882	protein_coding	utr	chr12-69577628-69577925	chr12-69537280-69538890	38737
chr18-80261559-80261781	4.52205e-07	0.257765	0.101	0.022	0.091487	ENSMUST00000157056	Pqlc1	ENSMUSG00000034006	protein_coding	gap	chr18-80257119-80263419	chr18-80261559-80261781	0
chr8-46655661-46656254	4.52208e-07	0.24022	0.057	0.004	0.0914875	ENSMUST00000093517	Casp3	ENSMUSG00000031628	protein_coding	utr	chr8-46638149-46638706	chr8-46655661-46656254	16954
chr1-39761058-39762341	4.58722e-07	0.251577	0.225	0.093	0.0928054	ENSMUST00000151913	Rfx8	ENSMUSG00000057173	protein_coding	exon	chr1-39720878-39720997	chr1-39761058-39762341	40060
chr12-17389731-17390785	4.61481e-07	0.23172	0.119	0.044	0.0933636	ENSMUST00000046011	Nol10	ENSMUSG00000061458	protein_coding	gap	chr12-17379301-17402072	chr12-17389731-17390785	0
chr11-53761844-53762179	4.61645e-07	0.272367	0.178	0.083	0.0933967	ENSMUST00000108920	Irf1	ENSMUSG00000018899	protein_coding	exon	chr11-53770014-53770278	chr11-53761844-53762179	7834
chr11-98399569-98401096	4.6169e-07	0.253438	0.264	0.126	0.0934058	ENSMUST00000128897	Pgap3	ENSMUSG00000038208	protein_coding	cds	chr11-98400215-98400395	chr11-98399569-98401096	0
chr1-89555031-89555966	4.61692e-07	0.245279	0.101	0.028	0.0934063	ENSMUST00000190096	Agap1	ENSMUSG00000055013	protein_coding	gap	chr1-89455593-89604597	chr1-89555031-89555966	0
chr6-93232596-93233060	4.62064e-07	0.249164	0.114	0.029	0.0934816	ENSMUST00000181121	9530026P05Rik	ENSMUSG00000097462	lincRNA	gap	chr6-93192204-93236651	chr6-93232596-93233060	0
chr7-128540735-128541452	4.6209e-07	0.242256	0.163	0.071	0.0934869	ENSMUST00000033136	Bag3	ENSMUSG00000030847	protein_coding	gap	chr7-128540312-128541806	chr7-128540735-128541452	0
chr2-122651269-122653326	4.62318e-07	0.240129	0.204	0.094	0.0935329	ENSMUST00000047498	AA467197	ENSMUSG00000033213	protein_coding	utr	chr2-122640770-122641191	chr2-122651269-122653326	10077
chr6-118047704-118048303	4.63957e-07	0.262512	0.168	0.068	0.0938646	ENSMUST00000164960	Rasgef1a	ENSMUSG00000030134	protein_coding	exon	chr6-118066385-118066462	chr6-118047704-118048303	18081
chr9-27109436-27110140	4.65488e-07	0.248951	0.176	0.074	0.0941743	ENSMUST00000167074	Jam3	ENSMUSG00000031990	protein_coding	gap	chr9-27106415-27155290	chr9-27109436-27110140	0
chr2-167631171-167632499	4.66211e-07	0.236179	0.434	0.234	0.0943205	ENSMUST00000109207	Ube2v1	ENSMUSG00000078923	protein_coding	cds	chr2-167631940-167631961	chr2-167631171-167632499	0
chr5-3340776-3344777	4.67709e-07	0.246417	0.307	0.16	0.0946237	ENSMUST00000165117	Cdk6	ENSMUSG00000040274	protein_coding	cds	chr5-3344367-3344599	chr5-3340776-3344777	0
chr1-95664155-95666449	4.68286e-07	0.243216	0.204	0.093	0.0947403	ENSMUST00000189556	St8sia4	ENSMUSG00000040710	protein_coding	gap	chr1-95660996-95667148	chr1-95664155-95666449	0
chr1-185277015-185277412	4.69579e-07	0.253202	0.09	0.023	0.0950019	ENSMUST00000194740	Rab3gap2	ENSMUSG00000039318	protein_coding	cds	chr1-185277147-185277221	chr1-185277015-185277412	0
chr15-38457185-38458621	4.70532e-07	0.252213	0.357	0.18	0.0951947	ENSMUST00000065308	Azin1	ENSMUSG00000037458	protein_coding	utr	chr15-38487430-38490360	chr15-38457185-38458621	28808
chr7-98359850-98361753	4.71087e-07	0.251574	0.202	0.081	0.095307	ENSMUST00000179780	Tsku	ENSMUSG00000049580	protein_coding	utr	chr7-98360021-98360079	chr7-98359850-98361753	0
chr7-89787652-89788140	4.7402e-07	0.249523	0.119	0.032	0.0959004	ENSMUST00000160995	Me3	ENSMUSG00000030621	protein_coding	gap	chr7-89786502-89796619	chr7-89787652-89788140	0
chr10-80098539-80098889	4.76435e-07	0.234389	0.119	0.042	0.096389	ENSMUST00000042771	Sbno2	ENSMUSG00000035673	protein_coding	gap	chr10-80086433-80102616	chr10-80098539-80098889	0
chr8-71665000-71666057	4.76535e-07	0.254974	0.106	0.025	0.0964092	ENSMUST00000177517	Unc13a	ENSMUSG00000034799	protein_coding	cds	chr8-71665979-71666078	chr8-71665000-71666057	0
chr10-30777845-30779061	4.78549e-07	0.204921	0.062	0.012	0.0968166	ENSMUST00000068567	Ncoa7	ENSMUSG00000039697	protein_coding	gap	chr10-30771841-30802828	chr10-30777845-30779061	0
chr10-44861483-44862356	4.79657e-07	0.262684	0.204	0.08	0.0970408	ENSMUST00000185159	Gm27977	ENSMUSG00000098642	rRNA	exon	chr10-44668384-44668494	chr10-44861483-44862356	192988
chr12-70023619-70023860	4.79862e-07	0.242523	0.093	0.03	0.0970822	ENSMUST00000169074	Nin	ENSMUSG00000021068	protein_coding	gap	chr12-70021032-70025379	chr12-70023619-70023860	0
chr10-61928673-61929575	4.86536e-07	0.251911	0.114	0.033	0.0984326	ENSMUST00000105454	Col13a1	ENSMUSG00000058806	protein_coding	gap	chr10-61920097-61961288	chr10-61928673-61929575	0
chr19-16168201-16169112	4.92343e-07	0.251133	0.181	0.08	0.0996074	ENSMUST00000170229	Gnaq	ENSMUSG00000024639	protein_coding	gap	chr19-16133462-16219587	chr19-16168201-16169112	0
chr4-149888966-149890409	4.92568e-07	0.248839	0.305	0.154	0.0996529	ENSMUST00000038562	Spsb1	ENSMUSG00000039911	protein_coding	utr	chr4-149896283-149898213	chr4-149888966-149890409	5873
chr8-116735387-116735600	4.94202e-07	0.200585	0.057	0.006	0.0999836	ENSMUST00000109102	Cdyl2	ENSMUSG00000031758	protein_coding	exon	chr8-116732798-116732991	chr8-116735387-116735600	2395
chr3-149338162-149339727	4.96475e-07	0.209175	0.067	0.016	0.100443	ENSMUST00000180599	Gm10287	ENSMUSG00000070342	lincRNA	exon	chr3-149221687-149225745	chr3-149338162-149339727	112416
chr12-111753163-111753547	5.00252e-07	0.230503	0.072	0.01	0.101207	ENSMUST00000163220	Apopt1	ENSMUSG00000037787	protein_coding	gap	chr12-111751276-111754963	chr12-111753163-111753547	0
chr4-33260943-33261953	5.05729e-07	0.258132	0.315	0.16	0.102316	ENSMUST00000137589	Pnrc1	ENSMUSG00000040128	protein_coding	gap	chr4-33246508-33289994	chr4-33260943-33261953	0
chr19-43563217-43563687	5.05905e-07	0.228069	0.065	0.007	0.102351	ENSMUST00000026196	Got1	ENSMUSG00000025190	protein_coding	exon	chr19-43524338-43524605	chr19-43563217-43563687	38611
chr15-25637669-25638398	5.08529e-07	0.244824	0.085	0.015	0.102882	ENSMUST00000137601	Myo10	ENSMUSG00000022272	protein_coding	gap	chr15-25623031-25701561	chr15-25637669-25638398	0
chr5-63982164-63982627	5.11921e-07	0.241828	0.072	0.012	0.103568	ENSMUST00000154169	Rell1	ENSMUSG00000047881	protein_coding	exon	chr5-63968646-63968905	chr5-63982164-63982627	13258
chr18-64634179-64634501	5.13574e-07	0.199554	0.057	0.007	0.103903	ENSMUST00000025482	Atp8b1	ENSMUSG00000039529	protein_coding	gap	chr18-64605401-64660699	chr18-64634179-64634501	0
chr9-32901052-32901816	5.13799e-07	0.239346	0.318	0.173	0.103948	ENSMUST00000185169	Gm27162	ENSMUSG00000099025	lincRNA	exon	chr9-32904937-32907042	chr9-32901052-32901816	3120
chr2-121294041-121294505	5.17518e-07	0.225023	0.083	0.019	0.104701	ENSMUST00000094639	Map1a	ENSMUSG00000027254	protein_coding	gap	chr2-121290822-121298596	chr2-121294041-121294505	0
chr4-57842600-57843158	5.17554e-07	0.235985	0.124	0.041	0.104708	ENSMUST00000150412	Palm2Akap2	ENSMUSG00000089945	protein_coding	gap	chr4-57757684-57854561	chr4-57842600-57843158	0
chr5-112298275-112298876	5.199e-07	0.267125	0.173	0.067	0.105183	ENSMUST00000151947	Tpst2	ENSMUSG00000029344	protein_coding	gap	chr5-112288813-112303899	chr5-112298275-112298876	0
chr1-89190773-89191883	5.22386e-07	0.245642	0.158	0.064	0.105686	ENSMUST00000066279	Sh3bp4	ENSMUSG00000036206	protein_coding	utr	chr1-89153352-89155068	chr1-89190773-89191883	35704
chr15-77581509-77582063	5.22487e-07	0.259186	0.147	0.049	0.105706	ENSMUST00000089465	Apol10b	ENSMUSG00000050014	protein_coding	utr	chr15-77584158-77584970	chr15-77581509-77582063	2094
chr13-43239697-43240250	5.24707e-07	0.237238	0.15	0.064	0.106155	ENSMUST00000055341	Gfod1	ENSMUSG00000051335	protein_coding	gap	chr13-43201245-43303244	chr13-43239697-43240250	0
chr19-55865652-55866544	5.28385e-07	0.240185	0.09	0.026	0.106899	ENSMUST00000153888	Tcf7l2	ENSMUSG00000024985	protein_coding	gap	chr19-55817866-55908422	chr19-55865652-55866544	0
chr18-83740390-83741496	5.32636e-07	0.205354	0.062	0.012	0.107759	ENSMUST00000060303	Tshz1	ENSMUSG00000046982	protein_coding	utr	chr18-84011627-84013026	chr18-83740390-83741496	270130
chr11-61597302-61598156	5.36579e-07	0.229598	0.075	0.015	0.108557	ENSMUST00000178202	Epn2	ENSMUSG00000001036	protein_coding	exon	chr11-61579567-61579687	chr11-61597302-61598156	17614
chr8-45874941-45875681	5.37437e-07	0.254905	0.227	0.093	0.10873	ENSMUST00000034053	Pdlim3	ENSMUSG00000031636	protein_coding	exon	chr8-45885485-45885672	chr8-45874941-45875681	9803
chr9-71566691-71567058	5.37465e-07	0.240612	0.124	0.036	0.108736	ENSMUST00000171977	Myzap	ENSMUSG00000041361	protein_coding	gap	chr9-71564566-71579610	chr9-71566691-71567058	0
chr8-88010437-88010873	5.39343e-07	0.26003	0.09	0.015	0.109116	ENSMUST00000181500	Gm2716	ENSMUSG00000097631	lincRNA	exon	chr8-88044898-88045226	chr8-88010437-88010873	34024
chr16-15983941-15985299	5.39775e-07	0.250466	0.302	0.148	0.109204	ENSMUST00000040248	Spidr	ENSMUSG00000041974	protein_coding	gap	chr16-15968718-16037489	chr16-15983941-15985299	0
chr5-32338045-32338646	5.41549e-07	0.259123	0.103	0.017	0.109562	ENSMUST00000101377	Plb1	ENSMUSG00000029134	protein_coding	cds	chr5-32338070-32338135	chr5-32338045-32338646	0
chr5-96916845-96918252	5.44e-07	0.227258	0.212	0.1	0.110058	ENSMUST00000031447	Anxa3	ENSMUSG00000029484	protein_coding	utr	chr5-96845561-96845968	chr5-96916845-96918252	70876
chr5-3151910-3152713	5.44873e-07	0.238401	0.111	0.036	0.110235	ENSMUST00000165117	Cdk6	ENSMUSG00000040274	protein_coding	exon	chr5-3343893-3343971	chr5-3151910-3152713	191179
chr13-52235817-52236804	5.45347e-07	0.242237	0.106	0.026	0.110331	ENSMUST00000181851	Gm26651	ENSMUSG00000097495	lincRNA	exon	chr13-51974498-51976583	chr13-52235817-52236804	259233
chr17-28463692-28464318	5.45672e-07	0.252079	0.145	0.042	0.110397	ENSMUST00000177939	Fkbp5	ENSMUSG00000024222	protein_coding	gap	chr17-28441054-28487904	chr17-28463692-28464318	0
chr6-84053748-84054363	5.4626e-07	0.250432	0.173	0.067	0.110516	ENSMUST00000168387	Dysf	ENSMUSG00000033788	protein_coding	gap	chr6-84039598-84058418	chr6-84053748-84054363	0
chr6-119864257-119865014	5.47738e-07	0.23479	0.08	0.016	0.110814	ENSMUST00000062454	3110021A11Rik	ENSMUSG00000050604	protein_coding	utr	chr6-119848633-119849013	chr6-119864257-119865014	15243
chr13-24337673-24339054	5.5047e-07	0.250731	0.282	0.148	0.111367	ENSMUST00000167746	Cmah	ENSMUSG00000016756	protein_coding	gap	chr13-24327489-24395198	chr13-24337673-24339054	0
chr8-24450031-24450920	5.5189e-07	0.265951	0.145	0.046	0.111654	ENSMUST00000181338	Gm26714	ENSMUSG00000097654	lincRNA	exon	chr8-24438648-24440008	chr8-24450031-24450920	10022
chr15-99028871-99030929	5.52719e-07	0.24741	0.313	0.144	0.111822	ENSMUST00000058914	Tuba1c	ENSMUSG00000043091	protein_coding	cds	chr15-99030422-99030424	chr15-99028871-99030929	0
chr8-46940694-46942031	5.54812e-07	0.248634	0.251	0.119	0.112246	ENSMUST00000140149	Enpp6	ENSMUSG00000038173	protein_coding	exon	chr8-46986925-46987211	chr8-46940694-46942031	44893
chr5-110769788-110771195	5.5693e-07	0.224144	0.579	0.361	0.112674	ENSMUST00000146458	Ep400	ENSMUSG00000029505	protein_coding	utr	chr5-110770492-110770585	chr5-110769788-110771195	0
chr1-184861622-184861921	5.58783e-07	0.228102	0.065	0.009	0.113049	ENSMUST00000048308	C130074G19Rik	ENSMUSG00000039349	protein_coding	utr	chr1-184871926-184874307	chr1-184861622-184861921	10004
chr18-35738454-35740677	5.59191e-07	0.249633	0.194	0.089	0.113132	ENSMUST00000115728	Tmem173	ENSMUSG00000024349	protein_coding	cds	chr18-35739351-35739577	chr18-35738454-35740677	0
chr7-130808682-130808995	5.59501e-07	0.207234	0.059	0.009	0.113194	ENSMUST00000124096	Fgfr2	ENSMUSG00000030849	protein_coding	gap	chr7-130172940-133081756	chr7-130808682-130808995	0
chr9-119101991-119103100	5.66304e-07	0.246878	0.155	0.057	0.114571	ENSMUST00000165231	Dlec1	ENSMUSG00000038060	protein_coding	cds	chr9-119102515-119102925	chr9-119101991-119103100	0
chr6-135482441-135482726	5.66545e-07	0.189084	0.052	0.004	0.114619	ENSMUST00000154270	Emp1	ENSMUSG00000030208	protein_coding	utr	chr6-135380974-135383173	chr6-135482441-135482726	99267
chr17-13682137-13684206	5.67908e-07	0.241563	0.439	0.244	0.114895	ENSMUST00000150889	Gm16046	ENSMUSG00000085705	processed_transcript	gap	chr17-13680185-13683177	chr17-13682137-13684206	0
chr8-70838735-70840189	5.67948e-07	0.219821	0.623	0.396	0.114903	ENSMUST00000002989	Arrdc2	ENSMUSG00000002910	protein_coding	cds	chr8-70839128-70839401	chr8-70838735-70840189	0
chr16-34493751-34494389	5.68109e-07	0.26174	0.09	0.017	0.114936	ENSMUST00000151491	Kalrn	ENSMUSG00000061751	protein_coding	gap	chr16-34392110-34513913	chr16-34493751-34494389	0
chr17-15299538-15300157	5.69554e-07	0.239421	0.165	0.061	0.115228	ENSMUST00000181658	Gm5091	ENSMUSG00000097624	lincRNA	exon	chr17-15240701-15240783	chr17-15299538-15300157	58754
chr1-87650510-87651685	5.74159e-07	0.251634	0.214	0.103	0.11616	ENSMUST00000169754	Inpp5d	ENSMUSG00000026288	protein_coding	gap	chr1-87635356-87665386	chr1-87650510-87651685	0
chr7-110108659-110109616	5.74606e-07	0.244374	0.111	0.038	0.11625	ENSMUST00000185931	1600010M07Rik	ENSMUSG00000101585	lincRNA	gap	chr7-110003716-110147627	chr7-110108659-110109616	0
chr11-101180720-101181163	5.75576e-07	0.237997	0.072	0.016	0.116446	ENSMUST00000103109	Cntnap1	ENSMUSG00000017167	protein_coding	gap	chr11-101180572-101181231	chr11-101180720-101181163	0
chr8-86887640-86888838	5.78259e-07	0.236124	0.284	0.145	0.116989	ENSMUST00000184161	2010110E17Rik	ENSMUSG00000098434	lincRNA	exon	chr8-86885688-86886566	chr8-86887640-86888838	1073
chr2-167117950-167118486	5.81202e-07	0.25761	0.129	0.039	0.117585	ENSMUST00000059826	Kcnb1	ENSMUSG00000050556	protein_coding	gap	chr2-167106360-167188056	chr2-167117950-167118486	0
chr15-53848236-53848881	5.81914e-07	0.28597	0.207	0.104	0.117729	ENSMUST00000154119	Samd12	ENSMUSG00000058656	protein_coding	gap	chr15-53719745-53860103	chr15-53848236-53848881	0
chr6-31584866-31585194	5.82266e-07	0.2051	0.052	0.006	0.1178	ENSMUST00000150540	Gm6117	ENSMUSG00000086732	lincRNA	exon	chr6-31575856-31576723	chr6-31584866-31585194	8142
chr4-126109625-126111414	5.82562e-07	0.22829	0.336	0.174	0.11786	ENSMUST00000139524	Stk40	ENSMUSG00000042608	protein_coding	gap	chr4-126104147-126118273	chr4-126109625-126111414	0
chr19-57079062-57079869	5.86283e-07	0.241189	0.145	0.051	0.118613	ENSMUST00000111559	Ablim1	ENSMUSG00000025085	protein_coding	cds	chr19-57079813-57079871	chr19-57079062-57079869	0
chr5-151367880-151369646	5.88979e-07	0.235453	0.556	0.347	0.119158	ENSMUST00000186838	D730045B01Rik	ENSMUSG00000054622	lincRNA	gap	chr5-151369171-151428118	chr5-151367880-151369646	0
chr9-21462894-21464138	5.89853e-07	0.252589	0.194	0.086	0.119335	ENSMUST00000174828	Dnm2	ENSMUSG00000033335	protein_coding	gap	chr9-21425257-21465581	chr9-21462894-21464138	0
chr11-88996449-88996669	5.89994e-07	0.240413	0.116	0.041	0.119363	ENSMUST00000128078	Gm11496	ENSMUSG00000085152	lincRNA	exon	chr11-88996402-88996544	chr11-88996449-88996669	0
chr7-19920100-19921279	5.90869e-07	0.245797	0.251	0.118	0.11954	ENSMUST00000043517	Pvr	ENSMUSG00000040511	protein_coding	cds	chr7-19920953-19921031	chr7-19920100-19921279	0
chr5-137031981-137033303	5.91139e-07	0.248248	0.233	0.119	0.119595	ENSMUST00000190827	Vgf	ENSMUSG00000037428	protein_coding	cds	chr5-137030986-137032839	chr5-137031981-137033303	0
chr2-152707285-152707947	5.92177e-07	0.252214	0.3	0.151	0.119805	ENSMUST00000125366	H13	ENSMUSG00000019188	protein_coding	utr	chr2-152704725-152708670	chr2-152707285-152707947	0
chr17-73918669-73919267	5.92542e-07	0.247608	0.09	0.019	0.119879	ENSMUST00000024866	Xdh	ENSMUSG00000024066	protein_coding	gap	chr17-73918558-73920392	chr17-73918669-73919267	0
chr6-71631740-71633653	5.95628e-07	0.227166	0.514	0.321	0.120503	ENSMUST00000167220	Kdm3a	ENSMUSG00000053470	protein_coding	cds	chr6-71632056-71632241	chr6-71631740-71633653	0
chr11-117968269-117970570	5.95965e-07	0.221765	0.481	0.284	0.120571	ENSMUST00000054002	Socs3	ENSMUSG00000053113	protein_coding	utr	chr11-117968875-117969186	chr11-117968269-117970570	0
chr4-131872881-131874729	5.99341e-07	0.234244	0.372	0.212	0.121255	ENSMUST00000129966	Srsf4	ENSMUSG00000028911	protein_coding	cds	chr4-131873816-131873870	chr4-131872881-131874729	0
chr2-148530420-148530879	6.04406e-07	0.244178	0.186	0.09	0.122279	ENSMUST00000129067	Gm14120	ENSMUSG00000087678	lincRNA	exon	chr2-148476067-148478780	chr2-148530420-148530879	51639
chr19-42130612-42131363	6.04437e-07	0.246387	0.147	0.058	0.122285	ENSMUST00000018965	Avpi1	ENSMUSG00000018821	protein_coding	exon	chr19-42128871-42129059	chr19-42130612-42131363	1552
chr13-52818747-52819111	6.05708e-07	0.233908	0.098	0.026	0.122543	ENSMUST00000137064	Auh	ENSMUSG00000021460	protein_coding	utr	chr13-52835119-52835551	chr13-52818747-52819111	16007
chr3-18338951-18339583	6.14291e-07	0.251517	0.072	0.012	0.124279	ENSMUST00000193120	RP23-77D22.1	ENSMUSG00000102886	lincRNA	exon	chr3-18341667-18342121	chr3-18338951-18339583	2083
chr18-12120349-12122071	6.1544e-07	0.247329	0.23	0.113	0.124512	ENSMUST00000092075	Tmem241	ENSMUSG00000049411	protein_coding	cds	chr18-12121381-12121452	chr18-12120349-12122071	0
chr12-55446356-55447428	6.23748e-07	0.261787	0.217	0.102	0.126192	ENSMUST00000021412	Psma6	ENSMUSG00000021024	protein_coding	utr	chr12-55418295-55418454	chr12-55446356-55447428	27901
chr9-70977440-70977722	6.24086e-07	0.243991	0.116	0.03	0.126261	ENSMUST00000034731	Lipc	ENSMUSG00000032207	protein_coding	exon	chr9-70934476-70934808	chr9-70977440-70977722	42631
chr18-69437135-69437803	6.26044e-07	0.213611	0.054	0.006	0.126657	ENSMUST00000155695	Tcf4	ENSMUSG00000053477	protein_coding	gap	chr18-69349145-69461861	chr18-69437135-69437803	0
chr4-134733987-134735091	6.2826e-07	0.249388	0.199	0.089	0.127105	ENSMUST00000185711	Gm29294	ENSMUSG00000100493	lincRNA	exon	chr4-134741554-134743421	chr4-134733987-134735091	6462
chr16-93815536-93817160	6.28879e-07	0.243703	0.207	0.103	0.12723	ENSMUST00000045004	Dopey2	ENSMUSG00000022946	protein_coding	utr	chr16-93810348-93810585	chr16-93815536-93817160	4950
chr15-59727781-59729409	6.29746e-07	0.245942	0.248	0.109	0.127406	ENSMUST00000067543	Trib1	ENSMUSG00000032501	protein_coding	utr	chr15-59654702-59656550	chr15-59727781-59729409	71230
chr18-60605955-60607399	6.34267e-07	0.253324	0.323	0.161	0.12832	ENSMUST00000160395	Synpo	ENSMUSG00000043079	protein_coding	gap	chr18-60604491-60609906	chr18-60605955-60607399	0
chr8-70282288-70283995	6.37517e-07	0.2431	0.351	0.205	0.128978	ENSMUST00000140212	Homer3	ENSMUSG00000003573	protein_coding	utr	chr8-70282827-70283100	chr8-70282288-70283995	0
chr16-84810251-84810547	6.38846e-07	0.242154	0.085	0.013	0.129247	ENSMUST00000098407	Jam2	ENSMUSG00000053062	protein_coding	utr	chr16-84809646-84810996	chr16-84810251-84810547	0
chr5-113199121-113199707	6.4012e-07	0.252303	0.088	0.022	0.129505	ENSMUST00000086615	Tmem211	ENSMUSG00000066964	protein_coding	exon	chr5-113226909-113227001	chr5-113199121-113199707	27201
chr8-36660219-36661440	6.40184e-07	0.250074	0.137	0.052	0.129518	ENSMUST00000163663	Dlc1	ENSMUSG00000031523	protein_coding	gap	chr8-36599441-36763644	chr8-36660219-36661440	0
chr19-42016824-42018197	6.41228e-07	0.245758	0.222	0.096	0.129729	ENSMUST00000026170	Ubtd1	ENSMUSG00000025171	protein_coding	gap	chr19-41982009-42031888	chr19-42016824-42018197	0
chr4-129819438-129821595	6.42298e-07	0.222168	0.483	0.279	0.129945	ENSMUST00000165853	Ptp4a2	ENSMUSG00000028788	protein_coding	utr	chr4-129820708-129820799	chr4-129819438-129821595	0
chr3-27351044-27351403	6.45963e-07	0.255333	0.114	0.035	0.130687	ENSMUST00000174840	Tnfsf10	ENSMUSG00000039304	protein_coding	utr	chr3-27342212-27342427	chr3-27351044-27351403	8616
chr5-147757895-147759244	6.48802e-07	0.242561	0.147	0.057	0.131261	ENSMUST00000031653	Flt1	ENSMUSG00000029648	protein_coding	exon	chr5-147725671-147726011	chr5-147757895-147759244	31883
chr2-75801527-75802243	6.49592e-07	0.234159	0.075	0.01	0.131421	ENSMUST00000135682	Gm13657	ENSMUSG00000086813	processed_transcript	exon	chr2-75780711-75782306	chr2-75801527-75802243	19220
chr6-122810098-122812092	6.49746e-07	0.218739	0.532	0.316	0.131452	ENSMUST00000181317	Gm26826	ENSMUSG00000097635	lincRNA	exon	chr6-122813626-122814855	chr6-122810098-122812092	1533
chr7-139285323-139285855	6.5095e-07	0.238208	0.096	0.023	0.131696	ENSMUST00000172136	Pwwp2b	ENSMUSG00000060260	protein_coding	utr	chr7-139266472-139267253	chr7-139285323-139285855	18069
chr12-84192297-84194489	6.54208e-07	0.230004	0.336	0.174	0.132355	ENSMUST00000110294	Elmsan1	ENSMUSG00000042507	protein_coding	utr	chr12-84193499-84194015	chr12-84192297-84194489	0
chr18-57673564-57673975	6.54489e-07	0.243699	0.078	0.01	0.132412	ENSMUST00000135806	1700011I03Rik	ENSMUSG00000058925	protein_coding	gap	chr18-57594136-57730714	chr18-57673564-57673975	0
chr18-60736663-60737463	6.59091e-07	0.252004	0.22	0.103	0.133343	ENSMUST00000169273	Ndst1	ENSMUSG00000054008	protein_coding	exon	chr18-60712723-60713389	chr18-60736663-60737463	23273
chr6-108709204-108710246	6.6716e-07	0.253533	0.24	0.116	0.134975	ENSMUST00000032194	Bhlhe40	ENSMUSG00000030103	protein_coding	utr	chr6-108665333-108666925	chr6-108709204-108710246	42278
chr8-104121344-104122374	6.70427e-07	0.235097	0.289	0.148	0.135636	ENSMUST00000034339	Cdh5	ENSMUSG00000031871	protein_coding	gap	chr8-104113103-104125458	chr8-104121344-104122374	0
chr11-55453051-55453967	6.75843e-07	0.245809	0.147	0.051	0.136732	ENSMUST00000138412	Atox1	ENSMUSG00000018585	protein_coding	gap	chr11-55446785-55454880	chr11-55453051-55453967	0
chr15-73446541-73447281	6.81874e-07	0.246661	0.264	0.122	0.137952	ENSMUST00000110036	Ptk2	ENSMUSG00000022607	protein_coding	exon	chr15-73423009-73423191	chr15-73446541-73447281	23349
chr17-83982874-83983513	6.83313e-07	0.262339	0.22	0.1	0.138243	ENSMUST00000157568	Gm23905	ENSMUSG00000088193	rRNA	exon	chr17-83947588-83947696	chr17-83982874-83983513	35177
chr9-37529700-37531397	6.89518e-07	0.277481	0.258	0.118	0.139498	ENSMUST00000144596	Esam	ENSMUSG00000001946	protein_coding	utr	chr9-37530250-37530510	chr9-37529700-37531397	0
chr5-43855412-43856137	6.90268e-07	0.237382	0.119	0.049	0.13965	ENSMUST00000118126	Bst1	ENSMUSG00000029082	protein_coding	utr	chr5-43842103-43843247	chr5-43855412-43856137	12164
chr5-150465990-150466685	6.94768e-07	0.26225	0.22	0.099	0.140561	ENSMUST00000087204	Fry	ENSMUSG00000056602	protein_coding	cds	chr5-150466244-150466441	chr5-150465990-150466685	0
chr13-43995410-43995933	6.98153e-07	0.227799	0.062	0.007	0.141245	ENSMUST00000163056	Gm5083	ENSMUSG00000089815	lincRNA	exon	chr13-44121167-44121441	chr13-43995410-43995933	125233
chr7-116100058-116100458	6.98298e-07	0.208291	0.057	0.004	0.141275	ENSMUST00000151254	1110004F10Rik	ENSMUSG00000030663	protein_coding	gap	chr7-116099524-116101943	chr7-116100058-116100458	0
chr8-120977038-120977566	6.98463e-07	0.247749	0.093	0.019	0.141308	ENSMUST00000127664	Gm20388	ENSMUSG00000092329	protein_coding	gap	chr8-119910940-124295357	chr8-120977038-120977566	0
chr10-77258539-77259782	6.98905e-07	0.234277	0.382	0.216	0.141397	ENSMUST00000105408	Gm10941	ENSMUSG00000078444	protein_coding	cds	chr10-77258779-77258925	chr10-77258539-77259782	0
chr9-75435764-75436290	6.99373e-07	0.256174	0.214	0.089	0.141492	ENSMUST00000181896	A130057D12Rik	ENSMUSG00000097298	protein_coding	cds	chr9-75441122-75441652	chr9-75435764-75436290	4831
chr19-5806066-5806408	7.01854e-07	0.257797	0.132	0.049	0.141994	ENSMUST00000172812	Malat1	ENSMUSG00000092341	lincRNA	exon	chr19-5795690-5802672	chr19-5806066-5806408	3393
chr18-11470560-11471226	7.02037e-07	0.215266	0.078	0.019	0.142031	ENSMUST00000115861	Rbbp8	ENSMUSG00000041238	protein_coding	exon	chr18-11633276-11633524	chr18-11470560-11471226	162049
chr2-144086012-144086628	7.03795e-07	0.26865	0.173	0.061	0.142387	ENSMUST00000110032	Banf2	ENSMUSG00000037307	protein_coding	utr	chr2-144073914-144073979	chr2-144086012-144086628	12032
chr11-86839407-86840782	7.04272e-07	0.237217	0.109	0.036	0.142483	ENSMUST00000018569	Dhx40	ENSMUSG00000018425	protein_coding	exon	chr11-86807438-86807746	chr11-86839407-86840782	31660
chr8-86475658-86476096	7.06848e-07	0.214083	0.065	0.01	0.143005	ENSMUST00000129898	Abcc12	ENSMUSG00000036872	protein_coding	utr	chr8-86482260-86482650	chr8-86475658-86476096	6163
chr12-100724061-100725692	7.0704e-07	0.228193	0.54	0.327	0.143043	ENSMUST00000043599	Rps6ka5	ENSMUSG00000021180	protein_coding	cds	chr12-100724781-100724880	chr12-100724061-100725692	0
chr6-92034447-92035318	7.07492e-07	0.248338	0.207	0.106	0.143135	ENSMUST00000113466	Fgd5	ENSMUSG00000034037	protein_coding	gap	chr6-92024634-92038024	chr6-92034447-92035318	0
chr17-31828206-31828407	7.09576e-07	0.235143	0.116	0.045	0.143556	ENSMUST00000024839	Sik1	ENSMUSG00000024042	protein_coding	utr	chr17-31844248-31846282	chr17-31828206-31828407	15840
chr18-38541938-38543573	7.10847e-07	0.233071	0.119	0.046	0.143814	ENSMUST00000025295	Spry4	ENSMUSG00000024427	protein_coding	utr	chr18-38586268-38589805	chr18-38541938-38543573	42694
chr7-123338495-123338709	7.1262e-07	0.231015	0.083	0.02	0.144172	ENSMUST00000167309	Arhgap17	ENSMUSG00000030766	protein_coding	gap	chr7-123331266-123369753	chr7-123338495-123338709	0
chr3-115779173-115780159	7.13254e-07	0.241789	0.119	0.03	0.144301	ENSMUST00000055676	S1pr1	ENSMUSG00000045092	protein_coding	exon	chr3-115714709-115715055	chr3-115779173-115780159	64117
chr7-75397380-75397933	7.19162e-07	0.250513	0.09	0.019	0.145496	ENSMUST00000147005	Akap13	ENSMUSG00000066406	protein_coding	exon	chr7-75455534-75455748	chr7-75397380-75397933	57600
chr13-37622283-37622948	7.21482e-07	0.189329	0.054	0.012	0.145965	ENSMUST00000190396	Gm29590	ENSMUSG00000100022	lincRNA	exon	chr13-37511180-37512074	chr13-37622283-37622948	110208
chr17-31940545-31940970	7.22185e-07	0.248807	0.098	0.025	0.146107	ENSMUST00000002145	Hsf2bp	ENSMUSG00000002076	protein_coding	utr	chr17-31944769-31946602	chr17-31940545-31940970	3798
chr8-125328622-125329101	7.25393e-07	0.241591	0.109	0.036	0.146756	ENSMUST00000118942	Disc1	ENSMUSG00000043051	protein_coding	utr	chr8-125261596-125261858	chr8-125328622-125329101	66763
chr8-121082826-121084587	7.28572e-07	0.250109	0.341	0.179	0.1474	ENSMUST00000181504	Foxf1	ENSMUSG00000042812	protein_coding	cds	chr8-121084399-121085374	chr8-121082826-121084587	0
chr12-110844521-110845778	7.34865e-07	0.245743	0.269	0.138	0.148673	ENSMUST00000180988	Gm26912	ENSMUSG00000097832	lincRNA	exon	chr12-110844093-110845216	chr12-110844521-110845778	0
chr3-108561843-108563656	7.37026e-07	0.229191	0.39	0.221	0.14911	ENSMUST00000106622	Tmem167b	ENSMUSG00000068732	protein_coding	cds	chr3-108562087-108562124	chr3-108561843-108563656	0
chr1-180393914-180394205	7.37759e-07	0.234129	0.093	0.026	0.149258	ENSMUST00000070181	Itpkb	ENSMUSG00000038855	protein_coding	gap	chr1-180334231-180412673	chr1-180393914-180394205	0
chr14-61548436-61549017	7.39623e-07	0.258935	0.08	0.017	0.149635	ENSMUST00000100496	Spryd7	ENSMUSG00000021930	protein_coding	gap	chr14-61545849-61549743	chr14-61548436-61549017	0
chr14-79586746-79588078	7.41569e-07	0.244046	0.419	0.242	0.150029	ENSMUST00000054908	Sugt1	ENSMUSG00000022024	protein_coding	cds	chr14-79587954-79588011	chr14-79586746-79588078	0
chr13-28842651-28843343	7.47902e-07	0.207576	0.065	0.012	0.15131	ENSMUST00000148885	2610307P16Rik	ENSMUSG00000085936	processed_transcript	gap	chr13-28772667-28883314	chr13-28842651-28843343	0
chr2-121007749-121009281	7.49098e-07	0.256918	0.256	0.134	0.151552	ENSMUST00000171260	Ccndbp1	ENSMUSG00000023572	protein_coding	cds	chr2-121009043-121009122	chr2-121007749-121009281	0
chr9-48354109-48355150	7.50775e-07	0.237972	0.111	0.03	0.151892	ENSMUST00000137976	Nxpe2	ENSMUSG00000032028	protein_coding	exon	chr9-48353364-48353454	chr9-48354109-48355150	654
chr16-88710480-88711044	7.52804e-07	0.255518	0.085	0.017	0.152302	ENSMUST00000050882	2310061N02Rik	ENSMUSG00000050704	protein_coding	exon	chr16-88707169-88707962	chr16-88710480-88711044	2517
chr4-32287849-32288940	7.54783e-07	0.257749	0.194	0.078	0.152702	ENSMUST00000156430	Bach2	ENSMUSG00000040270	protein_coding	gap	chr4-32248063-32317197	chr4-32287849-32288940	0
chr17-46750824-46752548	7.58612e-07	0.229271	0.439	0.254	0.153477	ENSMUST00000129200	Cnpy3	ENSMUSG00000023973	protein_coding	cds	chr17-46751973-46752123	chr17-46750824-46752548	0
chr14-103815330-103816060	7.59607e-07	0.246422	0.147	0.055	0.153678	ENSMUST00000172237	Ednrb	ENSMUSG00000022122	protein_coding	utr	chr14-103814626-103817065	chr14-103815330-103816060	0
chr11-119990872-119991625	7.60038e-07	0.239335	0.145	0.062	0.153766	ENSMUST00000106233	Baiap2	ENSMUSG00000025372	protein_coding	gap	chr11-119982127-119993695	chr11-119990872-119991625	0
chr8-22756664-22758009	7.60487e-07	0.247859	0.276	0.136	0.153856	ENSMUST00000033941	Plat	ENSMUSG00000031538	protein_coding	utr	chr8-22757744-22757828	chr8-22756664-22758009	0
chr17-10040497-10041387	7.65128e-07	0.254866	0.204	0.096	0.154795	ENSMUST00000097414	Qk	ENSMUSG00000062078	protein_coding	utr	chr17-10206471-10209614	chr17-10040497-10041387	165083
chr17-44238884-44239931	7.6622e-07	0.254154	0.233	0.102	0.155016	ENSMUST00000024755	Clic5	ENSMUSG00000023959	protein_coding	gap	chr17-44237243-44242033	chr17-44238884-44239931	0
chr2-92182769-92185860	7.67234e-07	0.231944	0.336	0.17	0.155221	ENSMUST00000162497	Phf21a	ENSMUSG00000058318	protein_coding	utr	chr2-92184302-92184352	chr2-92182769-92185860	0
chr5-29864009-29864798	7.67661e-07	0.205616	0.057	0.006	0.155308	ENSMUST00000008733	Dnajb6	ENSMUSG00000029131	protein_coding	utr	chr5-29785114-29786478	chr5-29864009-29864798	77530
chr13-99217932-99218728	7.67921e-07	0.235731	0.096	0.032	0.15536	ENSMUST00000056558	Zfp366	ENSMUSG00000050919	protein_coding	gap	chr13-99184865-99228318	chr13-99217932-99218728	0
chr12-3959375-3960784	7.70749e-07	0.231362	0.23	0.118	0.155932	ENSMUST00000020990	Pomc	ENSMUSG00000020660	protein_coding	cds	chr12-3959893-3960468	chr12-3959375-3960784	0
chr9-66311537-66311747	7.74679e-07	0.216148	0.057	0.009	0.156728	ENSMUST00000144280	Herc1	ENSMUSG00000038664	protein_coding	exon	chr9-66350450-66350621	chr9-66311537-66311747	38702
chr9-110683558-110685926	7.75138e-07	0.256649	0.204	0.091	0.156821	ENSMUST00000019803	Ccdc12	ENSMUSG00000019659	protein_coding	gap	chr9-110656659-110692315	chr9-110683558-110685926	0
chr4-132514533-132516005	7.75386e-07	0.243662	0.307	0.157	0.156871	ENSMUST00000030724	Sesn2	ENSMUSG00000028893	protein_coding	exon	chr4-132510064-132510501	chr4-132514533-132516005	4031
chr13-45623693-45624254	7.83929e-07	0.212621	0.072	0.017	0.158599	ENSMUST00000180110	Atxn1	ENSMUSG00000046876	protein_coding	gap	chr13-45568581-45697820	chr13-45623693-45624254	0
chr8-117364476-117365127	7.85997e-07	0.224907	0.085	0.026	0.159017	ENSMUST00000166750	Cmip	ENSMUSG00000034390	protein_coding	gap	chr8-117257402-117377074	chr8-117364476-117365127	0
chr4-117999976-118000508	7.88965e-07	0.215979	0.067	0.012	0.159618	ENSMUST00000138274	St3gal3	ENSMUSG00000028538	protein_coding	gap	chr4-117964425-118014704	chr4-117999976-118000508	0
chr7-84142818-84143619	7.89668e-07	0.203754	0.054	0.01	0.15976	ENSMUST00000131505	Abhd17c	ENSMUSG00000038459	protein_coding	gap	chr7-84136155-84147734	chr7-84142818-84143619	0
chr10-59577518-59578966	7.92144e-07	0.24051	0.204	0.09	0.160261	ENSMUST00000161435	Mcu	ENSMUSG00000009647	protein_coding	gap	chr10-59535107-59599927	chr10-59577518-59578966	0
chr18-61767526-61768453	7.95929e-07	0.260843	0.235	0.122	0.161027	ENSMUST00000154876	Afap1l1	ENSMUSG00000033032	protein_coding	gap	chr18-61758729-61786575	chr18-61767526-61768453	0
chr2-25110687-25111764	7.98465e-07	0.252294	0.323	0.17	0.16154	ENSMUST00000123483	Gm13387	ENSMUSG00000087028	lincRNA	exon	chr2-25122603-25122731	chr2-25110687-25111764	10838
chr4-136461885-136463118	8.01747e-07	0.238778	0.284	0.151	0.162204	ENSMUST00000084593	6030445D17Rik	ENSMUSG00000066178	protein_coding	cds	chr4-136462310-136462756	chr4-136461885-136463118	0
chr14-19733162-19734119	8.02036e-07	0.24232	0.078	0.015	0.162262	ENSMUST00000022340	Nid2	ENSMUSG00000021806	protein_coding	exon	chr14-19751257-19751565	chr14-19733162-19734119	17137
chr2-181218834-181220420	8.02406e-07	0.232749	0.227	0.107	0.162337	ENSMUST00000108835	BC051628	ENSMUSG00000047841	protein_coding	utr	chr2-181220037-181220134	chr2-181218834-181220420	0
chr7-116715052-116715932	8.04326e-07	0.24173	0.057	0.004	0.162726	ENSMUST00000122543	n-R5s157	ENSMUSG00000084492	rRNA	exon	chr7-116625122-116625242	chr7-116715052-116715932	89809
chr4-45011512-45013405	8.07503e-07	0.219952	0.576	0.36	0.163368	ENSMUST00000180217	Zbtb5	ENSMUSG00000049657	protein_coding	utr	chr4-45011847-45012412	chr4-45011512-45013405	0
chr18-43394419-43394934	8.16355e-07	0.240333	0.093	0.017	0.165159	ENSMUST00000121805	Dpysl3	ENSMUSG00000024501	protein_coding	gap	chr18-43363592-43437829	chr18-43394419-43394934	0
chr14-66845322-66846689	8.26069e-07	0.239086	0.191	0.089	0.167125	ENSMUST00000022629	Dpysl2	ENSMUSG00000022048	protein_coding	gap	chr14-66834377-66862472	chr14-66845322-66846689	0
chr13-56549338-56549770	8.27982e-07	0.245491	0.165	0.057	0.167512	ENSMUST00000062806	Lect2	ENSMUSG00000021539	protein_coding	exon	chr13-56548317-56548538	chr13-56549338-56549770	799
chr2-74899916-74900321	8.30436e-07	0.248537	0.137	0.051	0.168008	ENSMUST00000028511	Mtx2	ENSMUSG00000027099	protein_coding	utr	chr2-74876475-74878431	chr2-74899916-74900321	21484
chr19-8818472-8820924	8.32731e-07	0.21579	0.558	0.35	0.168472	ENSMUST00000153281	Ttc9c	ENSMUSG00000071660	protein_coding	cds	chr19-8818436-8818673	chr19-8818472-8820924	0
chr8-126526877-126527557	8.33052e-07	0.265642	0.258	0.12	0.168537	ENSMUST00000170518	Gm17296	ENSMUSG00000090290	protein_coding	exon	chr8-126474255-126475065	chr8-126526877-126527557	51811
chr4-137500928-137501275	8.333e-07	0.212319	0.07	0.01	0.168588	ENSMUST00000171332	Hspg2	ENSMUSG00000028763	protein_coding	cds	chr4-137501059-137501194	chr4-137500928-137501275	0
chr1-105152187-105152611	8.33659e-07	0.224914	0.078	0.017	0.16866	ENSMUST00000187882	Gm29012	ENSMUSG00000099669	lincRNA	exon	chr1-105127187-105127366	chr1-105152187-105152611	24820
chr6-48840091-48841704	8.3861e-07	0.265873	0.271	0.123	0.169662	ENSMUST00000168406	Tmem176a	ENSMUSG00000023367	protein_coding	utr	chr6-48841656-48841710	chr6-48840091-48841704	0
chr13-51644434-51646104	8.47141e-07	0.241182	0.375	0.193	0.171388	ENSMUST00000075853	Cks2	ENSMUSG00000062248	protein_coding	cds	chr13-51645413-51645471	chr13-51644434-51646104	0
chr16-55733444-55734567	8.48759e-07	0.24706	0.088	0.028	0.171715	ENSMUST00000114458	Nfkbiz	ENSMUSG00000035356	protein_coding	utr	chr16-55811375-55812729	chr16-55733444-55734567	76807
chr14-74880738-74881338	8.50277e-07	0.196753	0.065	0.012	0.172022	ENSMUST00000088970	Lrch1	ENSMUSG00000068015	protein_coding	gap	chr14-74858122-74947383	chr14-74880738-74881338	0
chr11-83788895-83789682	8.50564e-07	0.246323	0.114	0.042	0.17208	ENSMUST00000001002	Heatr6	ENSMUSG00000000976	protein_coding	utr	chr11-83781723-83783754	chr11-83788895-83789682	5140
chr2-167924807-167926372	8.51159e-07	0.252218	0.279	0.135	0.172201	ENSMUST00000147210	Ptpn1	ENSMUSG00000027540	protein_coding	exon	chr2-167932057-167932329	chr2-167924807-167926372	5684
chr9-63970422-63971037	8.54929e-07	0.270145	0.152	0.06	0.172963	ENSMUST00000144323	Smad6	ENSMUSG00000036867	protein_coding	gap	chr9-63954057-63989471	chr9-63970422-63971037	0
chr2-131376797-131377310	8.57378e-07	0.219439	0.054	0.006	0.173459	ENSMUST00000142982	Rnf24	ENSMUSG00000048911	protein_coding	exon	chr2-131352736-131352892	chr2-131376797-131377310	23904
chr18-56790059-56790965	8.58236e-07	0.224851	0.08	0.016	0.173632	ENSMUST00000102912	March3	ENSMUSG00000032656	protein_coding	gap	chr18-56783229-56807663	chr18-56790059-56790965	0
chr5-113179809-113180903	8.62249e-07	0.238201	0.297	0.16	0.174444	ENSMUST00000050125	2900026A02Rik	ENSMUSG00000051339	protein_coding	exon	chr5-113163058-113163351	chr5-113179809-113180903	16457
chr11-106778948-106779835	8.66346e-07	0.252289	0.313	0.16	0.175273	ENSMUST00000155107	Polg2	ENSMUSG00000020718	protein_coding	cds	chr11-106779084-106779442	chr11-106778948-106779835	0
chr9-106344735-106345497	8.66358e-07	0.236722	0.075	0.015	0.175275	ENSMUST00000191434	Poc1a	ENSMUSG00000023345	protein_coding	gap	chr9-106308034-106349681	chr9-106344735-106345497	0
chr6-145210358-145212232	8.68261e-07	0.231912	0.494	0.296	0.17566	ENSMUST00000060797	Casc1	ENSMUSG00000043541	protein_coding	cds	chr6-145210807-145210809	chr6-145210358-145212232	0
chr10-62065945-62066600	8.71099e-07	0.230703	0.093	0.019	0.176235	ENSMUST00000053865	Gm5424	ENSMUSG00000046687	protein_coding	exon	chr10-62071015-62072609	chr10-62065945-62066600	4414
chr19-46478263-46479727	8.7554e-07	0.262345	0.248	0.118	0.177133	ENSMUST00000111867	Sufu	ENSMUSG00000025231	protein_coding	gap	chr19-46475647-46483599	chr19-46478263-46479727	0
chr5-105626002-105626451	8.77435e-07	0.218764	0.062	0.013	0.177516	ENSMUST00000067924	Lrrc8c	ENSMUSG00000054720	protein_coding	utr	chr5-105608773-105613018	chr5-105626002-105626451	12983
chr5-142544958-142545732	8.79462e-07	0.228001	0.075	0.01	0.177927	ENSMUST00000085758	Radil	ENSMUSG00000029576	protein_coding	utr	chr5-142544916-142545028	chr5-142544958-142545732	0
chr1-89876465-89877005	8.81891e-07	0.246616	0.096	0.025	0.178418	ENSMUST00000190096	Agap1	ENSMUSG00000055013	protein_coding	gap	chr1-89843244-89887505	chr1-89876465-89877005	0
chr9-56497346-56497859	8.8289e-07	0.239391	0.083	0.015	0.17862	ENSMUST00000034879	Hmg20a	ENSMUSG00000032329	protein_coding	utr	chr9-56494533-56496884	chr9-56497346-56497859	461
chr12-13145094-13146116	8.87925e-07	0.260862	0.253	0.118	0.179639	ENSMUST00000071103	Ddx1	ENSMUSG00000037149	protein_coding	utr	chr12-13219308-13219497	chr12-13145094-13146116	73191
chr5-77357322-77358675	8.95531e-07	0.260814	0.23	0.103	0.181178	ENSMUST00000163898	Igfbp7	ENSMUSG00000036256	protein_coding	gap	chr5-77355672-77401486	chr5-77357322-77358675	0
chr1-135711012-135711470	8.97465e-07	0.240211	0.114	0.035	0.181569	ENSMUST00000097561	Csrp1	ENSMUSG00000026421	protein_coding	exon	chr1-135720061-135720193	chr1-135711012-135711470	8590
chr7-93136092-93136318	8.98574e-07	0.225681	0.057	0.009	0.181793	ENSMUST00000181886	Gm26862	ENSMUSG00000097644	lincRNA	exon	chr7-93103046-93104789	chr7-93136092-93136318	31302
chr10-128034734-128037103	8.99024e-07	0.234868	0.367	0.19	0.181884	ENSMUST00000092048	Naca	ENSMUSG00000061315	protein_coding	cds	chr10-128036491-128036560	chr10-128034734-128037103	0
chrX-109190741-109191764	9.04304e-07	0.253303	0.204	0.08	0.182952	ENSMUST00000133614	Sh3bgrl	ENSMUSG00000031246	protein_coding	gap	chrX-109154387-109196710	chrX-109190741-109191764	0
chr11-61644561-61645701	9.04425e-07	0.215111	0.088	0.028	0.182977	ENSMUST00000004959	Grap	ENSMUSG00000004837	protein_coding	exon	chr11-61653265-61653424	chr11-61644561-61645701	7563
chr17-14826517-14827169	9.0667e-07	0.201003	0.062	0.009	0.183431	ENSMUST00000170386	Wdr27	ENSMUSG00000046991	protein_coding	utr	chr17-14829331-14829561	chr17-14826517-14827169	2161
chr19-3985215-3985636	9.16691e-07	0.250931	0.127	0.045	0.185458	ENSMUST00000054030	Acy3	ENSMUSG00000024866	protein_coding	exon	chr19-3986661-3987305	chr19-3985215-3985636	1024
chr5-149524100-149524879	9.18161e-07	0.256919	0.181	0.067	0.185756	ENSMUST00000156774	Gm15997	ENSMUSG00000086744	processed_transcript	gap	chr5-149503706-149537912	chr5-149524100-149524879	0
chr2-170209088-170209697	9.2158e-07	0.242463	0.307	0.161	0.186448	ENSMUST00000180625	Gm17619	ENSMUSG00000097514	lincRNA	exon	chr2-170193953-170194053	chr2-170209088-170209697	15034
chr4-129623592-129625549	9.22581e-07	0.224248	0.261	0.139	0.18665	ENSMUST00000174073	Tmem234	ENSMUSG00000028797	protein_coding	utr	chr4-129623889-129624059	chr4-129623592-129625549	0
chr13-41336097-41336595	9.30429e-07	0.257119	0.098	0.02	0.188238	ENSMUST00000163623	Nedd9	ENSMUSG00000021365	protein_coding	gap	chr13-41318546-41338576	chr13-41336097-41336595	0
chr1-74283867-74285443	9.33511e-07	0.233307	0.496	0.298	0.188861	ENSMUST00000190008	Aamp	ENSMUSG00000006299	protein_coding	cds	chr1-74284174-74284276	chr1-74283867-74285443	0
chr7-64064492-64065228	9.3844e-07	0.254018	0.155	0.051	0.189859	ENSMUST00000175664	Gm20670	ENSMUSG00000093542	processed_transcript	exon	chr7-64062906-64062958	chr7-64064492-64065228	1533
chr11-96410961-96411378	9.39077e-07	0.222673	0.098	0.03	0.189987	ENSMUST00000153012	Gm11529	ENSMUSG00000075586	processed_transcript	exon	chr11-96448323-96448457	chr11-96410961-96411378	36944
chr3-133600454-133601208	9.41439e-07	0.228658	0.083	0.016	0.190465	ENSMUST00000098603	Tet2	ENSMUSG00000040943	protein_coding	exon	chr3-133544200-133544390	chr3-133600454-133601208	56063
chr2-170258414-170258660	9.41743e-07	0.239978	0.083	0.022	0.190527	ENSMUST00000180625	Gm17619	ENSMUSG00000097514	lincRNA	exon	chr2-170193953-170194053	chr2-170258414-170258660	64360
chr1-135583332-135584070	9.48776e-07	0.209756	0.054	0.007	0.19195	ENSMUST00000190298	Nav1	ENSMUSG00000009418	protein_coding	gap	chr1-135537300-135584554	chr1-135583332-135584070	0
chr6-120835441-120836972	9.50204e-07	0.239092	0.305	0.174	0.192239	ENSMUST00000009256	Bcl2l13	ENSMUSG00000009112	protein_coding	utr	chr6-120836230-120836357	chr6-120835441-120836972	0
chr4-8962949-8963267	9.54775e-07	0.202585	0.059	0.007	0.193163	ENSMUST00000051558	Chd7	ENSMUSG00000041235	protein_coding	utr	chr4-8866656-8867659	chr4-8962949-8963267	95289
chr5-115235196-115236156	9.54941e-07	0.240903	0.227	0.112	0.193197	ENSMUST00000081497	Pop5	ENSMUSG00000060152	protein_coding	utr	chr5-115235836-115235884	chr5-115235196-115236156	0
chr11-102338534-102339849	9.5558e-07	0.251509	0.147	0.054	0.193326	ENSMUST00000006749	Slc4a1	ENSMUSG00000006574	protein_coding	utr	chr11-102348824-102350286	chr11-102338534-102339849	8974
chr2-152742461-152742772	9.56058e-07	0.26322	0.155	0.061	0.193423	ENSMUST00000109824	Id1	ENSMUSG00000042745	protein_coding	utr	chr2-152736848-152737410	chr2-152742461-152742772	5050
chr7-120830206-120831401	9.77728e-07	0.247318	0.225	0.109	0.197807	ENSMUST00000047875	Eef2k	ENSMUSG00000035064	protein_coding	exon	chr7-120842831-120843100	chr7-120830206-120831401	11429
chr5-150195339-150196554	9.78607e-07	0.256251	0.212	0.093	0.197985	ENSMUST00000087204	Fry	ENSMUSG00000056602	protein_coding	exon	chr5-150259930-150260338	chr5-150195339-150196554	63375
chr18-82910308-82910958	9.85561e-07	0.238446	0.152	0.061	0.199392	ENSMUST00000171238	Zfp516	ENSMUSG00000058881	protein_coding	utr	chr18-82910879-82910992	chr18-82910308-82910958	0
chr11-95688129-95689447	9.87917e-07	0.243271	0.129	0.054	0.199868	ENSMUST00000125172	Phb	ENSMUSG00000038845	protein_coding	utr	chr11-95679907-95680773	chr11-95688129-95689447	7355
chr11-86756144-86758571	9.90774e-07	0.220882	0.512	0.306	0.200447	ENSMUST00000103186	Cltc	ENSMUSG00000047126	protein_coding	cds	chr11-86757248-86757289	chr11-86756144-86758571	0
chr12-4006021-4007679	9.97417e-07	0.21135	0.072	0.016	0.20179	ENSMUST00000111178	Efr3b	ENSMUSG00000020658	protein_coding	gap	chr12-4000957-4038703	chr12-4006021-4007679	0
chr1-11033060-11033872	1.00129e-06	0.261454	0.209	0.096	0.202574	ENSMUST00000027056	Prex2	ENSMUSG00000048960	protein_coding	gap	chr1-10993910-11061325	chr1-11033060-11033872	0
chr10-7142121-7142607	1.00219e-06	0.245514	0.121	0.039	0.202756	ENSMUST00000015346	Cnksr3	ENSMUSG00000015202	protein_coding	gap	chr10-7140439-7142960	chr10-7142121-7142607	0
chr2-34843189-34843790	1.00569e-06	0.239282	0.212	0.104	0.203464	ENSMUST00000028225	Psmd5	ENSMUSG00000026869	protein_coding	utr	chr2-34852088-34852575	chr2-34843189-34843790	8297
chr12-73574602-73575294	1.00893e-06	0.24014	0.137	0.046	0.20412	ENSMUST00000021527	Prkch	ENSMUSG00000021108	protein_coding	exon	chr12-73584797-73585525	chr12-73574602-73575294	9502
chr2-52929842-52930805	1.00907e-06	0.239274	0.114	0.042	0.204149	ENSMUST00000090952	Fmnl2	ENSMUSG00000036053	protein_coding	gap	chr2-52858260-53014802	chr2-52929842-52930805	0
chr10-77398026-77398402	1.01072e-06	0.23757	0.101	0.026	0.204481	ENSMUST00000156583	Adarb1	ENSMUSG00000020262	protein_coding	gap	chr10-77359736-77418094	chr10-77398026-77398402	0
chr11-93994755-93997388	1.01184e-06	0.217731	0.501	0.286	0.204707	ENSMUST00000041956	Spag9	ENSMUSG00000020859	protein_coding	cds	chr11-93996271-93996573	chr11-93994755-93997388	0
chr2-116971726-116972851	1.01353e-06	0.219555	0.127	0.049	0.20505	ENSMUST00000188763	Gm29340	ENSMUSG00000099470	lincRNA	exon	chr2-116972575-116976428	chr2-116971726-116972851	0
chr9-88273028-88274307	1.01705e-06	0.236845	0.078	0.017	0.205763	ENSMUST00000190118	Gm28231	ENSMUSG00000100782	lincRNA	exon	chr9-88260697-88263035	chr9-88273028-88274307	9992
chr11-54786536-54788264	1.01761e-06	0.236118	0.393	0.234	0.205875	ENSMUST00000153209	Cdc42se2	ENSMUSG00000052298	protein_coding	utr	chr11-54787560-54787646	chr11-54786536-54788264	0
chr11-51897321-51897659	1.02109e-06	0.252404	0.191	0.077	0.20658	ENSMUST00000020655	Jade2	ENSMUSG00000020387	protein_coding	exon	chr11-51857311-51857653	chr11-51897321-51897659	39667
chr10-75170009-75170831	1.02193e-06	0.245232	0.233	0.096	0.20675	ENSMUST00000164107	Bcr	ENSMUSG00000009681	protein_coding	gap	chr10-75168239-75175276	chr10-75170009-75170831	0
chr11-93884627-93887313	1.02413e-06	0.229483	0.465	0.27	0.207196	ENSMUST00000066888	Utp18	ENSMUSG00000054079	protein_coding	cds	chr11-93885334-93885657	chr11-93884627-93887313	0
chr6-48711396-48712298	1.02859e-06	0.239301	0.121	0.045	0.208098	ENSMUST00000053661	Gimap6	ENSMUSG00000047867	protein_coding	exon	chr6-48707959-48708225	chr6-48711396-48712298	3170
chr13-37446644-37447056	1.03459e-06	0.25946	0.23	0.112	0.20931	ENSMUST00000191359	Gm29459	ENSMUSG00000100932	lincRNA	exon	chr13-37449400-37449721	chr13-37446644-37447056	2343
chr1-131747719-131748178	1.041e-06	0.216512	0.057	0.007	0.210608	ENSMUST00000186122	Slc26a9	ENSMUSG00000042268	protein_coding	gap	chr1-131744114-131750579	chr1-131747719-131748178	0
chr18-11978141-11978895	1.04142e-06	0.25856	0.186	0.074	0.210693	ENSMUST00000055447	Tmem241	ENSMUSG00000049411	protein_coding	utr	chr18-11981303-11983593	chr18-11978141-11978895	2407
chr1-53977899-53978783	1.04477e-06	0.241953	0.181	0.086	0.211371	ENSMUST00000146850	Hecw2	ENSMUSG00000042807	protein_coding	gap	chr1-53950922-54040200	chr1-53977899-53978783	0
chr5-29854287-29854863	1.05302e-06	0.206884	0.065	0.013	0.213039	ENSMUST00000008733	Dnajb6	ENSMUSG00000029131	protein_coding	utr	chr5-29785114-29786478	chr5-29854287-29854863	67808
chr10-78228176-78228696	1.05662e-06	0.221213	0.078	0.013	0.213768	ENSMUST00000000384	Trappc10	ENSMUSG00000000374	protein_coding	gap	chr10-78222861-78228778	chr10-78228176-78228696	0
chr8-125102289-125102669	1.05832e-06	0.234797	0.106	0.028	0.214111	ENSMUST00000126111	Disc1	ENSMUSG00000043051	protein_coding	gap	chr8-125090443-125102606	chr8-125102289-125102669	0
chr4-62348017-62348588	1.06482e-06	0.238248	0.14	0.052	0.215427	ENSMUST00000131977	Fkbp15	ENSMUSG00000066151	protein_coding	gap	chr4-62346142-62352432	chr4-62348017-62348588	0
chr14-25614140-25615357	1.06553e-06	0.234084	0.145	0.055	0.21557	ENSMUST00000162645	Zmiz1	ENSMUSG00000007817	protein_coding	gap	chr14-25581674-25635872	chr14-25614140-25615357	0
chr5-139363898-139365333	1.0696e-06	0.242086	0.313	0.183	0.216393	ENSMUST00000066052	3110082I17Rik	ENSMUSG00000053553	protein_coding	cds	chr5-139363973-139364163	chr5-139363898-139365333	0
chr5-134539713-134540331	1.07112e-06	0.257089	0.212	0.089	0.216701	ENSMUST00000100647	Clip2	ENSMUSG00000063146	protein_coding	gap	chr5-134535238-134552045	chr5-134539713-134540331	0
chr18-38949900-38950381	1.08118e-06	0.219938	0.072	0.017	0.218737	ENSMUST00000148850	Arhgap26	ENSMUSG00000036452	protein_coding	gap	chr18-38933965-39097629	chr18-38949900-38950381	0
chr3-81009230-81010240	1.09062e-06	0.217916	0.059	0.013	0.220646	ENSMUST00000029652	Pdgfc	ENSMUSG00000028019	protein_coding	exon	chr3-81036416-81037554	chr3-81009230-81010240	26175
chr13-110562295-110563207	1.09373e-06	0.229243	0.264	0.144	0.221275	ENSMUST00000022212	Plk2	ENSMUSG00000021701	protein_coding	utr	chr13-110400225-110400844	chr13-110562295-110563207	161450
chr4-6365066-6366572	1.10028e-06	0.234804	0.326	0.174	0.222601	ENSMUST00000175769	Sdcbp	ENSMUSG00000028249	protein_coding	utr	chr4-6365709-6365921	chr4-6365066-6366572	0
chr1-4622414-4622715	1.1036e-06	0.208511	0.065	0.012	0.223273	ENSMUST00000195771	RP23-37D15.1	ENSMUSG00000104328	lincRNA	exon	chr1-4585937-4586252	chr1-4622414-4622715	36161
chr15-101144785-101146789	1.11283e-06	0.254891	0.333	0.183	0.22514	ENSMUST00000120754	Acvrl1	ENSMUSG00000000530	protein_coding	utr	chr15-101143478-101145336	chr15-101144785-101146789	0
chr2-152741378-152742176	1.12744e-06	0.250154	0.274	0.129	0.228095	ENSMUST00000109824	Id1	ENSMUSG00000042745	protein_coding	utr	chr2-152736848-152737410	chr2-152741378-152742176	3967
chr2-27087676-27089043	1.13419e-06	0.24355	0.225	0.113	0.229462	ENSMUST00000091233	Adamtsl2	ENSMUSG00000036040	protein_coding	gap	chr2-27087292-27089583	chr2-27087676-27089043	0
chr11-117255973-117256483	1.13617e-06	0.242596	0.173	0.065	0.229863	ENSMUST00000106354	Sept9	ENSMUSG00000059248	protein_coding	gap	chr11-117232720-117290397	chr11-117255973-117256483	0
chr17-31965553-31966016	1.13761e-06	0.209103	0.067	0.012	0.230153	ENSMUST00000133308	Hsf2bp	ENSMUSG00000002076	protein_coding	gap	chr17-31946812-32007675	chr17-31965553-31966016	0
chr8-13624651-13625232	1.13966e-06	0.234923	0.155	0.058	0.230569	ENSMUST00000154454	Rasa3	ENSMUSG00000031453	protein_coding	gap	chr8-13614638-13631774	chr8-13624651-13625232	0
chr11-54961434-54961795	1.14716e-06	0.228233	0.088	0.02	0.232084	ENSMUST00000132776	Tnip1	ENSMUSG00000020400	protein_coding	gap	chr11-54940883-54962832	chr11-54961434-54961795	0
chr9-108577928-108579138	1.15766e-06	0.239901	0.235	0.115	0.234209	ENSMUST00000068700	Wdr6	ENSMUSG00000066357	protein_coding	cds	chr9-108578494-108578593	chr9-108577928-108579138	0
chr15-79346982-79348441	1.161e-06	0.224491	0.442	0.255	0.234886	ENSMUST00000163691	Maff	ENSMUSG00000042622	protein_coding	utr	chr15-79348061-79348246	chr15-79346982-79348441	0
chr3-51194955-51195928	1.16121e-06	0.243647	0.165	0.062	0.234927	ENSMUST00000023849	Ccrn4l	ENSMUSG00000023087	protein_coding	exon	chr3-51224447-51225287	chr3-51194955-51195928	28518
chr8-86881204-86881551	1.16719e-06	0.23385	0.062	0.01	0.236139	ENSMUST00000034074	N4bp1	ENSMUSG00000031652	protein_coding	gap	chr8-86862111-86884821	chr8-86881204-86881551	0
chr2-93141898-93142913	1.17148e-06	0.263449	0.119	0.042	0.237005	ENSMUST00000150159	Gm13802	ENSMUSG00000087559	lincRNA	exon	chr2-93098075-93098244	chr2-93141898-93142913	43653
chr17-70753449-70753964	1.17181e-06	0.242679	0.176	0.073	0.237072	ENSMUST00000181546	5031415H12Rik	ENSMUSG00000097282	lincRNA	gap	chr17-70752100-70755067	chr17-70753449-70753964	0
chr14-34215618-34216028	1.17577e-06	0.239124	0.119	0.035	0.237874	ENSMUST00000147298	Syt15	ENSMUSG00000041479	protein_coding	exon	chr14-34219595-34220180	chr14-34215618-34216028	3566
chr2-84019638-84020310	1.17865e-06	0.254317	0.145	0.055	0.238456	ENSMUST00000099947	Gm13691	ENSMUSG00000079247	protein_coding	cds	chr2-83990553-83993045	chr2-84019638-84020310	26592
chr10-5497565-5498155	1.18344e-06	0.223267	0.088	0.02	0.239426	ENSMUST00000041639	Syne1	ENSMUSG00000096054	protein_coding	gap	chr10-5456869-5541947	chr10-5497565-5498155	0
chr19-44900062-44901166	1.19002e-06	0.220116	0.096	0.028	0.240757	ENSMUST00000096053	Fam178a	ENSMUSG00000036097	protein_coding	exon	chr19-44931119-44931450	chr19-44900062-44901166	29952
chr4-83380226-83380782	1.19624e-06	0.221762	0.054	0.004	0.242015	ENSMUST00000126437	Gm11184	ENSMUSG00000087592	lincRNA	exon	chr4-83383064-83383161	chr4-83380226-83380782	2281
chr19-36860507-36860717	1.19665e-06	0.214219	0.052	0.006	0.242098	ENSMUST00000168718	Tnks2	ENSMUSG00000024811	protein_coding	gap	chr19-36859177-36862085	chr19-36860507-36860717	0
chr11-69062281-69063727	1.19761e-06	0.237479	0.377	0.208	0.242291	ENSMUST00000051888	2310047M10Rik	ENSMUSG00000045176	protein_coding	utr	chr11-69060881-69061578	chr11-69062281-69063727	702
chr12-108267655-108267999	1.19913e-06	0.236642	0.134	0.048	0.242599	ENSMUST00000136175	Ccdc85c	ENSMUSG00000084883	protein_coding	gap	chr12-108221783-108274337	chr12-108267655-108267999	0
chr1-166064929-166065145	1.20145e-06	0.213649	0.057	0.006	0.243069	ENSMUST00000181378	Gm26665	ENSMUSG00000097196	lincRNA	exon	chr1-166037441-166038256	chr1-166064929-166065145	26672
chr2-60838828-60839199	1.20207e-06	0.254513	0.207	0.084	0.243195	ENSMUST00000164147	Rbms1	ENSMUSG00000026970	protein_coding	gap	chr2-60797743-60842296	chr2-60838828-60839199	0
chr14-64011710-64012234	1.20337e-06	0.219563	0.072	0.015	0.243458	ENSMUST00000058229	Rp1l1	ENSMUSG00000046049	protein_coding	gap	chr14-63992629-64021889	chr14-64011710-64012234	0
chr7-65469475-65470619	1.22017e-06	0.265991	0.189	0.065	0.246857	ENSMUST00000102592	Tjp1	ENSMUSG00000030516	protein_coding	exon	chr7-65370810-65371239	chr7-65469475-65470619	98235
chr2-20776211-20776513	1.22967e-06	0.19485	0.052	0.007	0.248778	ENSMUST00000146488	Etl4	ENSMUSG00000036617	protein_coding	gap	chr2-20766612-20778025	chr2-20776211-20776513	0
chr11-88187222-88188312	1.23338e-06	0.245189	0.24	0.122	0.249528	ENSMUST00000018522	Cuedc1	ENSMUSG00000018378	protein_coding	cds	chr11-88187994-88188087	chr11-88187222-88188312	0
chr10-77265850-77266637	1.23481e-06	0.238994	0.14	0.062	0.249818	ENSMUST00000020493	Pofut2	ENSMUSG00000020260	protein_coding	cds	chr10-77265836-77265961	chr10-77265850-77266637	0
chr6-52172298-52173057	1.23592e-06	0.253162	0.199	0.096	0.250042	ENSMUST00000134831	Hoxa3	ENSMUSG00000079560	protein_coding	cds	chr6-52172571-52172649	chr6-52172298-52173057	0
chr2-30625270-30626662	1.2423e-06	0.223852	0.132	0.055	0.251334	ENSMUST00000146702	9330198N18Rik	ENSMUSG00000086405	lincRNA	exon	chr2-30629655-30629745	chr2-30625270-30626662	2992
chr8-33842080-33842552	1.24477e-06	0.248481	0.209	0.096	0.251833	ENSMUST00000191473	Rbpms	ENSMUSG00000031586	protein_coding	gap	chr8-33834455-33862985	chr8-33842080-33842552	0
chr2-169663647-169664647	1.24525e-06	0.234314	0.119	0.038	0.251931	ENSMUST00000181446	Gm26883	ENSMUSG00000096972	lincRNA	gap	chr2-169633744-169790962	chr2-169663647-169664647	0
chr11-118074893-118075590	1.2503e-06	0.237769	0.124	0.045	0.252951	ENSMUST00000132685	Dnah17	ENSMUSG00000033987	protein_coding	gap	chr11-118074445-118078561	chr11-118074893-118075590	0
chr5-113889095-113889620	1.25148e-06	0.221416	0.07	0.013	0.25319	ENSMUST00000171630	Coro1c	ENSMUSG00000004530	protein_coding	gap	chr5-113882158-113908610	chr5-113889095-113889620	0
chr11-60726577-60728786	1.25326e-06	0.232616	0.346	0.177	0.253551	ENSMUST00000002889	Flii	ENSMUSG00000002812	protein_coding	cds	chr11-60727127-60727189	chr11-60726577-60728786	0
chr4-44107237-44107662	1.25367e-06	0.216493	0.072	0.016	0.253635	ENSMUST00000146576	Gm12503	ENSMUSG00000087326	processed_transcript	exon	chr4-44106331-44109311	chr4-44107237-44107662	0
chr1-182227364-182227793	1.2554e-06	0.205376	0.052	0.007	0.253984	ENSMUST00000035295	Degs1	ENSMUSG00000038633	protein_coding	utr	chr1-182275772-182276746	chr1-182227364-182227793	47978
chr17-67133282-67133979	1.26165e-06	0.231346	0.093	0.022	0.255247	ENSMUST00000037974	Ptprm	ENSMUSG00000033278	protein_coding	gap	chr17-67095696-67191248	chr17-67133282-67133979	0
chr10-93069130-93069653	1.26171e-06	0.24241	0.196	0.093	0.25526	ENSMUST00000171781	Cfap54	ENSMUSG00000020014	protein_coding	gap	chr10-93066851-93069828	chr10-93069130-93069653	0
chr11-103292007-103292899	1.26198e-06	0.240068	0.147	0.057	0.255315	ENSMUST00000139621	1700028N14Rik	ENSMUSG00000078635	processed_transcript	exon	chr11-103267338-103267745	chr11-103292007-103292899	24261
chr1-151338137-151339159	1.26782e-06	0.226601	0.07	0.015	0.256497	ENSMUST00000023918	Ivns1abp	ENSMUSG00000023150	protein_coding	exon	chr1-151344477-151344755	chr1-151338137-151339159	5317
chr10-5295100-5295727	1.26818e-06	0.221968	0.078	0.016	0.25657	ENSMUST00000041639	Syne1	ENSMUSG00000096054	protein_coding	utr	chr10-5336949-5339202	chr10-5295100-5295727	41221
chr5-136986356-136988652	1.2686e-06	0.243576	0.357	0.194	0.256654	ENSMUST00000156963	Znhit1	ENSMUSG00000059518	protein_coding	cds	chr5-136987489-136987507	chr5-136986356-136988652	0
chr4-142095471-142095818	1.27129e-06	0.239872	0.059	0.009	0.257199	ENSMUST00000155023	Kazn	ENSMUSG00000040606	protein_coding	utr	chr4-142102390-142104789	chr4-142095471-142095818	6571
chr9-15600393-15601075	1.28084e-06	0.238165	0.103	0.029	0.259131	ENSMUST00000152377	Ccdc67	ENSMUSG00000039977	protein_coding	cds	chr9-15600903-15601016	chr9-15600393-15601075	0
chr13-54302251-54303949	1.29155e-06	0.239172	0.191	0.084	0.261297	ENSMUST00000026985	Cplx2	ENSMUSG00000025867	protein_coding	exon	chr13-54371349-54371575	chr13-54302251-54303949	67399
chr2-36229985-36231247	1.29274e-06	0.238188	0.116	0.041	0.261537	ENSMUST00000062069	Ptgs1	ENSMUSG00000047250	protein_coding	cds	chr2-36230668-36230763	chr2-36229985-36231247	0
chr16-29813403-29814458	1.30178e-06	0.223816	0.176	0.077	0.263367	ENSMUST00000181815	Gm26834	ENSMUSG00000097307	lincRNA	gap	chr16-29811301-29837107	chr16-29813403-29814458	0
chr11-79002459-79003555	1.31035e-06	0.243484	0.152	0.055	0.2651	ENSMUST00000018478	Ksr1	ENSMUSG00000018334	protein_coding	utr	chr11-79013440-79016184	chr11-79002459-79003555	9884
chr15-76659405-76661482	1.31337e-06	0.219763	0.463	0.28	0.265712	ENSMUST00000004294	Kifc2	ENSMUSG00000004187	protein_coding	cds	chr15-76661480-76661618	chr15-76659405-76661482	0
chr19-3986078-3986685	1.31604e-06	0.249987	0.14	0.054	0.266253	ENSMUST00000054030	Acy3	ENSMUSG00000024866	protein_coding	utr	chr19-3986661-3987069	chr19-3986078-3986685	0
chr19-21077415-21078801	1.32103e-06	0.269654	0.134	0.028	0.267262	ENSMUST00000039500	Tmc1	ENSMUSG00000024749	protein_coding	exon	chr19-20954144-20954202	chr19-21077415-21078801	123212
chr2-84635004-84636409	1.32857e-06	0.248307	0.204	0.086	0.268788	ENSMUST00000189772	Gm28635	ENSMUSG00000101645	protein_coding	gap	chr2-84626138-84676096	chr2-84635004-84636409	0
chr15-78580931-78582241	1.32966e-06	0.228542	0.238	0.131	0.269007	ENSMUST00000043214	Rac2	ENSMUSG00000033220	protein_coding	exon	chr15-78572611-78572783	chr15-78580931-78582241	8147
chr5-108714184-108714478	1.33093e-06	0.21234	0.062	0.012	0.269264	ENSMUST00000112560	Fgfrl1	ENSMUSG00000008090	protein_coding	utr	chr5-108706346-108706950	chr5-108714184-108714478	7233
chr3-38936395-38937598	1.33257e-06	0.230167	0.127	0.045	0.269597	ENSMUST00000129182	Fat4	ENSMUSG00000046743	protein_coding	gap	chr3-38892135-38942808	chr3-38936395-38937598	0
chr4-45452336-45453507	1.33441e-06	0.249652	0.134	0.055	0.269969	ENSMUST00000147926	Shb	ENSMUSG00000044813	protein_coding	gap	chr4-45447678-45458126	chr4-45452336-45453507	0
chr9-119087587-119088804	1.33561e-06	0.252828	0.217	0.09	0.270212	ENSMUST00000010804	Plcd1	ENSMUSG00000010660	protein_coding	gap	chr9-119084755-119093357	chr9-119087587-119088804	0
chr3-37768982-37769932	1.33667e-06	0.242386	0.264	0.136	0.270425	ENSMUST00000099128	Gm5148	ENSMUSG00000058174	protein_coding	exon	chr3-37724203-37724490	chr3-37768982-37769932	44491
chr7-25316188-25317245	1.33688e-06	0.246087	0.323	0.18	0.270468	ENSMUST00000128119	Megf8	ENSMUSG00000045039	protein_coding	utr	chr7-25317164-25317506	chr7-25316188-25317245	0
chr5-147925950-147926615	1.33764e-06	0.228891	0.114	0.039	0.270622	ENSMUST00000138406	Gm15721	ENSMUSG00000085565	processed_transcript	exon	chr5-147949882-147950522	chr5-147925950-147926615	23266
chr7-19500170-19502014	1.33805e-06	0.237634	0.09	0.022	0.270705	ENSMUST00000137613	Exoc3l2	ENSMUSG00000011263	protein_coding	utr	chr7-19495249-19496760	chr7-19500170-19502014	3409
chr9-32400464-32401417	1.33934e-06	0.257294	0.165	0.065	0.270965	ENSMUST00000172015	Kcnj1	ENSMUSG00000041248	protein_coding	utr	chr9-32397461-32399192	chr9-32400464-32401417	1271
chr2-84404857-84405104	1.34605e-06	0.213419	0.085	0.016	0.272323	ENSMUST00000151295	Calcrl	ENSMUSG00000059588	protein_coding	gap	chr2-84377046-84425069	chr2-84404857-84405104	0
chr17-78444654-78445199	1.34735e-06	0.249391	0.132	0.041	0.272586	ENSMUST00000070039	Fez2	ENSMUSG00000056121	protein_coding	exon	chr17-78417833-78418131	chr17-78444654-78445199	26522
chr5-142920357-142921358	1.34858e-06	0.237279	0.297	0.151	0.272836	ENSMUST00000100497	Actb	ENSMUSG00000029580	protein_coding	exon	chr5-142906652-142906754	chr5-142920357-142921358	13602
chr4-137476242-137477354	1.34879e-06	0.241004	0.119	0.033	0.272878	ENSMUST00000171332	Hspg2	ENSMUSG00000028763	protein_coding	gap	chr4-137468925-137501058	chr4-137476242-137477354	0
chr3-57501596-57502063	1.35266e-06	0.211063	0.093	0.02	0.273661	ENSMUST00000120977	Wwtr1	ENSMUSG00000027803	protein_coding	cds	chr3-57501732-57501868	chr3-57501596-57502063	0
chr15-10685729-10686341	1.35347e-06	0.243481	0.124	0.036	0.273824	ENSMUST00000169385	Rai14	ENSMUSG00000022246	protein_coding	gap	chr15-10633267-10690370	chr15-10685729-10686341	0
chr18-56760764-56761141	1.35381e-06	0.254651	0.158	0.049	0.273893	ENSMUST00000102912	March3	ENSMUSG00000032656	protein_coding	utr	chr18-56761716-56762514	chr18-56760764-56761141	574
chr7-110768007-110769521	1.35482e-06	0.246439	0.173	0.074	0.274098	ENSMUST00000170374	Ampd3	ENSMUSG00000005686	protein_coding	utr	chr7-110768206-110768379	chr7-110768007-110769521	0
chr6-86403528-86404808	1.35584e-06	0.239389	0.354	0.179	0.274304	ENSMUST00000130967	Tia1	ENSMUSG00000071337	protein_coding	cds	chr6-86404497-86404522	chr6-86403528-86404808	0
chr2-180223315-180223545	1.35598e-06	0.236049	0.098	0.029	0.274332	ENSMUST00000015791	Lama5	ENSMUSG00000015647	protein_coding	gap	chr2-180221379-180225490	chr2-180223315-180223545	0
chr5-96196564-96196906	1.35978e-06	0.219071	0.072	0.013	0.275101	ENSMUST00000117766	Mrpl1	ENSMUSG00000029486	protein_coding	exon	chr5-96209493-96209565	chr5-96196564-96196906	12586
chr19-59065981-59066313	1.36415e-06	0.232806	0.062	0.009	0.275984	ENSMUST00000163821	4930506M07Rik	ENSMUSG00000041362	protein_coding	gap	chr19-59060684-59075454	chr19-59065981-59066313	0
chr1-162635082-162636085	1.36751e-06	0.219464	0.057	0.006	0.276665	ENSMUST00000028020	Myoc	ENSMUSG00000026697	protein_coding	exon	chr1-162639155-162639825	chr1-162635082-162636085	3069
chr2-35617179-35617642	1.37001e-06	0.24147	0.121	0.038	0.27717	ENSMUST00000135741	Dab2ip	ENSMUSG00000026883	protein_coding	gap	chr2-35583050-35643887	chr2-35617179-35617642	0
chr11-95413334-95415168	1.371e-06	0.234658	0.421	0.239	0.27737	ENSMUST00000150884	Spop	ENSMUSG00000057522	protein_coding	utr	chr11-95414332-95414404	chr11-95413334-95415168	0
chr4-154246142-154247081	1.37785e-06	0.25567	0.155	0.058	0.278757	ENSMUST00000152159	Megf6	ENSMUSG00000057751	protein_coding	gap	chr4-154242525-154249426	chr4-154246142-154247081	0
chr5-135777800-135779161	1.38006e-06	0.229574	0.403	0.219	0.279205	ENSMUST00000138101	Mdh2	ENSMUSG00000019179	protein_coding	cds	chr5-135778736-135778801	chr5-135777800-135779161	0
chr15-97862758-97863236	1.38135e-06	0.192833	0.059	0.01	0.279465	ENSMUST00000023119	Vdr	ENSMUSG00000022479	protein_coding	gap	chr15-97859250-97867116	chr15-97862758-97863236	0
chr2-164460707-164461864	1.38373e-06	0.247563	0.331	0.184	0.279946	ENSMUST00000164863	Gm20458	ENSMUSG00000090996	protein_coding	cds	chr2-164461368-164461529	chr2-164460707-164461864	0
chr4-62407293-62409341	1.38678e-06	0.231029	0.326	0.168	0.280564	ENSMUST00000084524	Prpf4	ENSMUSG00000066148	protein_coding	cds	chr4-62408875-62408901	chr4-62407293-62409341	0
chr11-86623686-86624821	1.39402e-06	0.232447	0.121	0.042	0.282029	ENSMUST00000018315	Vmp1	ENSMUSG00000018171	protein_coding	gap	chr11-86611423-86635174	chr11-86623686-86624821	0
chr18-65000375-65001716	1.39672e-06	0.235911	0.116	0.036	0.282575	ENSMUST00000163516	Nedd4l	ENSMUSG00000024589	protein_coding	gap	chr18-64997422-65074723	chr18-65000375-65001716	0
chr8-120204711-120205218	1.39716e-06	0.254343	0.116	0.033	0.282664	ENSMUST00000127664	Gm20388	ENSMUSG00000092329	protein_coding	gap	chr8-119910940-124295357	chr8-120204711-120205218	0
chr7-25385520-25386711	1.39784e-06	0.236888	0.204	0.104	0.282802	ENSMUST00000149349	Lipe	ENSMUSG00000003123	protein_coding	cds	chr7-25385437-25385527	chr7-25385520-25386711	0
chr11-117963161-117963857	1.40543e-06	0.230107	0.401	0.226	0.284336	ENSMUST00000054002	Socs3	ENSMUSG00000053113	protein_coding	utr	chr11-117966079-117967552	chr11-117963161-117963857	2221
chr2-59286168-59286672	1.41979e-06	0.244782	0.189	0.087	0.287243	ENSMUST00000184705	Pkp4	ENSMUSG00000026991	protein_coding	gap	chr2-59214815-59289217	chr2-59286168-59286672	0
chr11-116800867-116801748	1.41992e-06	0.217542	0.057	0.007	0.287269	ENSMUST00000021170	Mxra7	ENSMUSG00000020814	protein_coding	utr	chr11-116803062-116804539	chr11-116800867-116801748	1313
chr8-93940696-93941227	1.42e-06	0.225448	0.07	0.012	0.287284	ENSMUST00000138659	Gnao1	ENSMUSG00000031748	protein_coding	gap	chr8-93896373-93944197	chr8-93940696-93941227	0
chr2-32881613-32883000	1.42233e-06	0.236793	0.258	0.135	0.287756	ENSMUST00000028135	Fam129b	ENSMUSG00000026796	protein_coding	gap	chr2-32876405-32905768	chr2-32881613-32883000	0
chr8-95330927-95332602	1.42392e-06	0.225253	0.486	0.283	0.288078	ENSMUST00000034245	Usb1	ENSMUSG00000031792	protein_coding	cds	chr8-95332362-95332465	chr8-95330927-95332602	0
chr18-65697363-65698653	1.42529e-06	0.235049	0.127	0.044	0.288354	ENSMUST00000117694	Oacyl	ENSMUSG00000046610	protein_coding	cds	chr18-65698294-65698441	chr18-65697363-65698653	0
[truncated: 13,362 more rows]
