# Supplementary material for: Single-cell multiomics reveals endothelial mechanosensitive PIEZO1 coupling IL-33 regulates the development of pulmonary fibrosis
Source: Research Square preprint supplement (doi:10.21203/rs.3.rs-4861689/v1), 2024-09-06
Supplement: Supplementary file 13 [file Table S9.xlsx]

## Sheet: Sheet1
Supplenetary Table 8: Mice Sequencing Data Summary
Type	Organism	disease state	sample-name	Estimated Number of cells	Median Fragments per cell	Fraction of fragments overlapping any targeted region	Fraction of transposition events in peaks in cell barcodes	Total number of read pairs	Fraction of read pairs with a valid barcode	Enrichment score of transcription start sites	Fraction of fragments overlapping called peaks
scATAC	Mouse	Bleomycin	Bleomycin1	4696	6280	0.779	0.567	131748366	0.973	14.1	0.596
scATAC	Mouse	Bleomycin	Bleomycin2	9497	15515	0.707	0.477	685572225	0.969	10.52	0.498
scATAC	Mouse	Bleomycin	Bleomycin3	11476	14404	0.694	0.486	641949959	0.969	10.68	0.507
scATAC	Mouse	Saline	Saline1	2,235	16,962	0.773	0.543	465473559	0.973	13.6	0.574
scATAC	Mouse	Saline	Saline2	9744	11191	0.678	0.526	653606600	0.968	10.86	0.545
scATAC	Mouse	Saline	Saline3	3661	11872	0.75	0.568	314837262	0.971	14.79	0.592
